# Supplementary material
Source: PubMed Central journal article supplement (PMC10786554)

# Motif Group 1

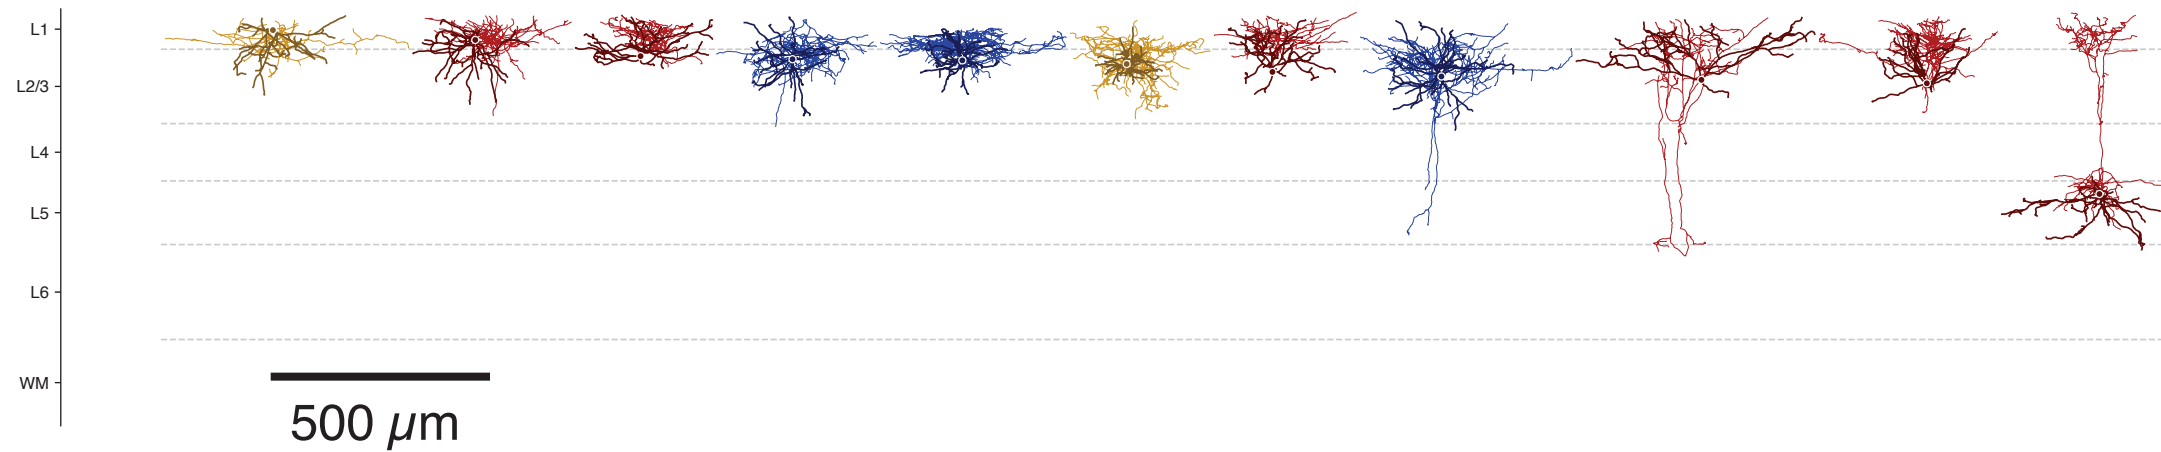

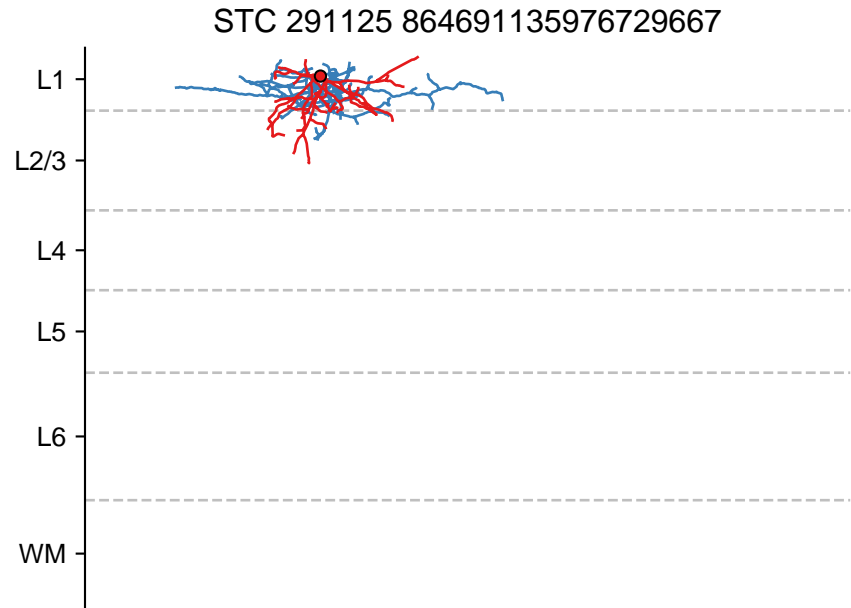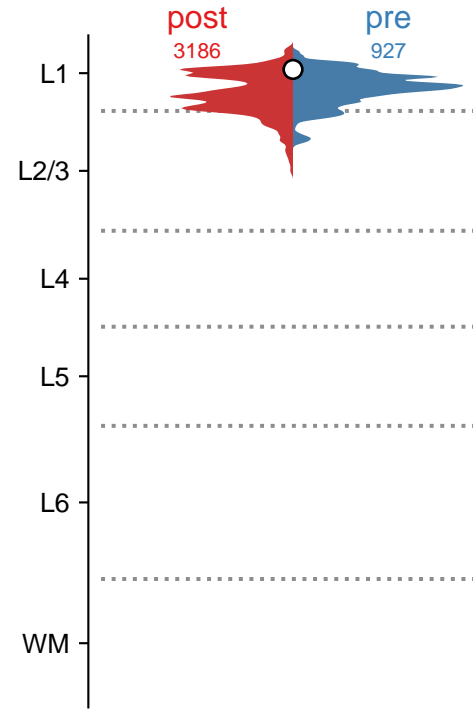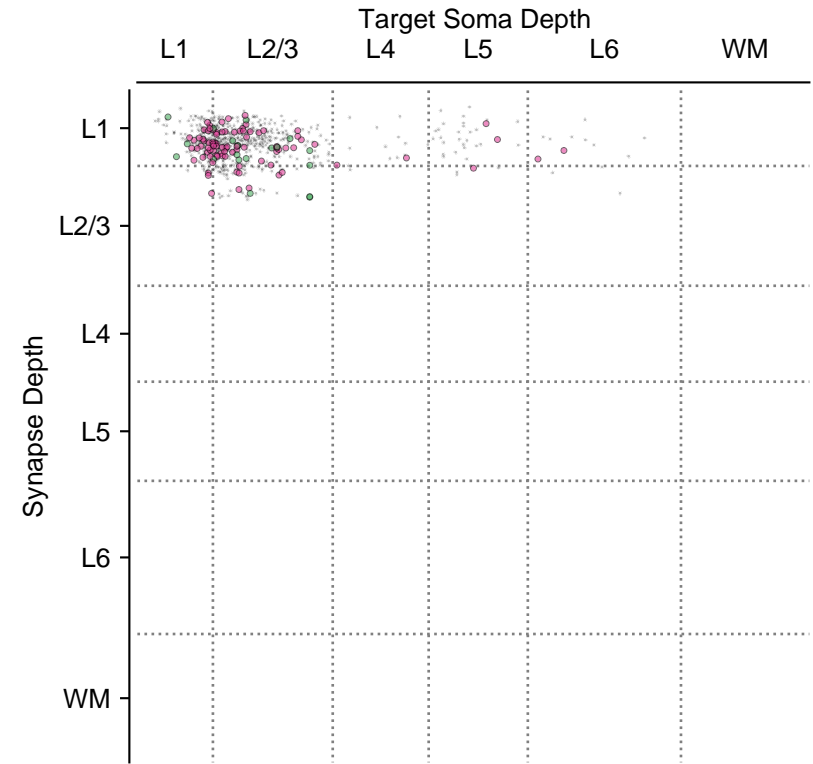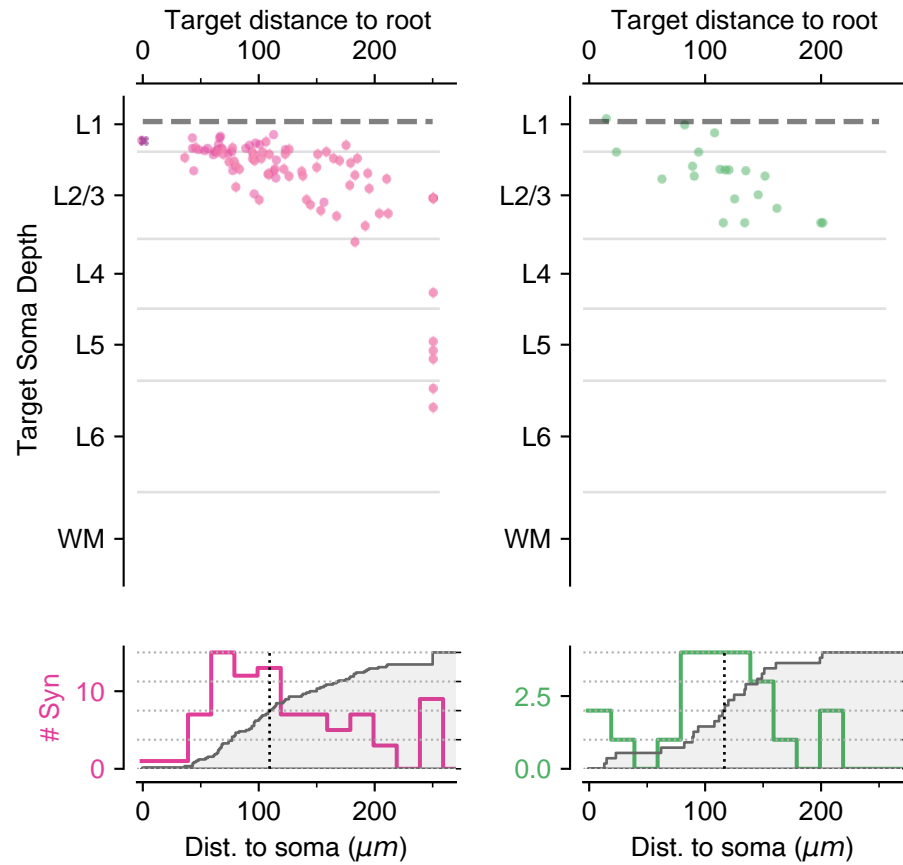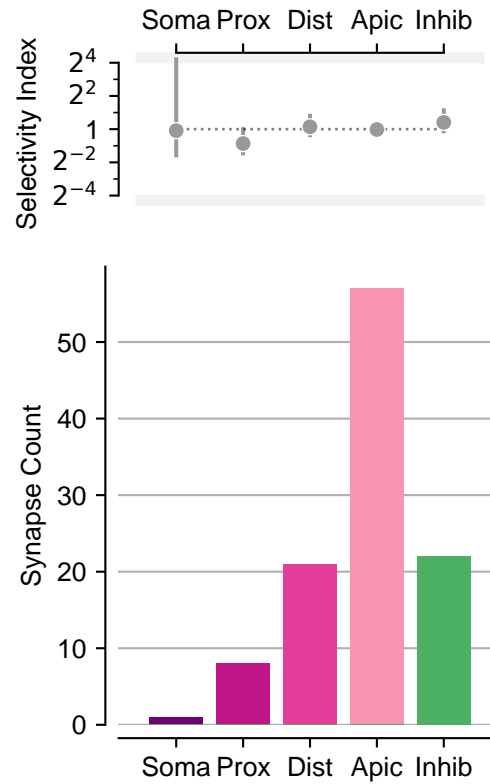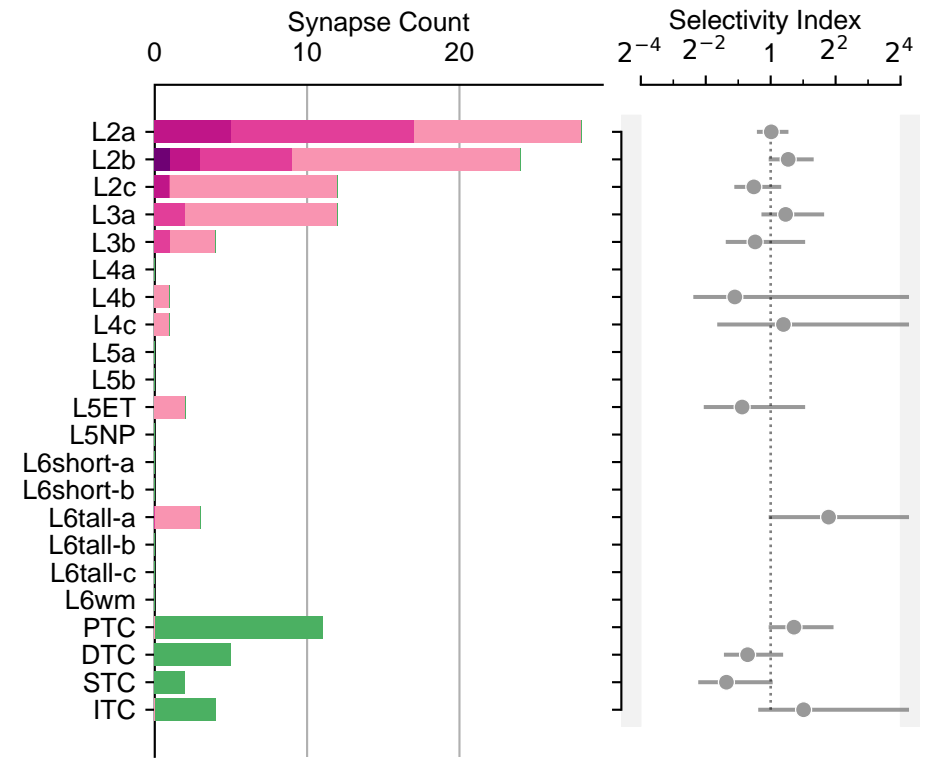

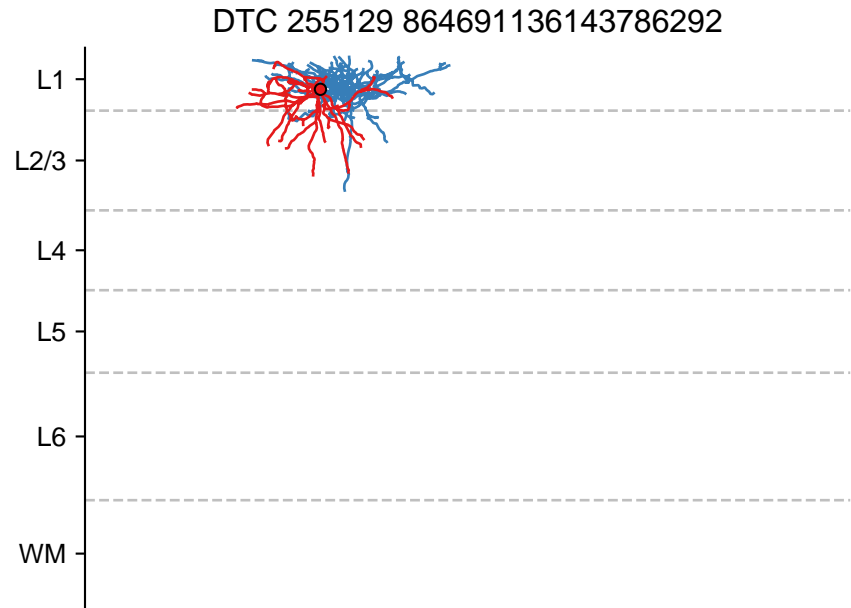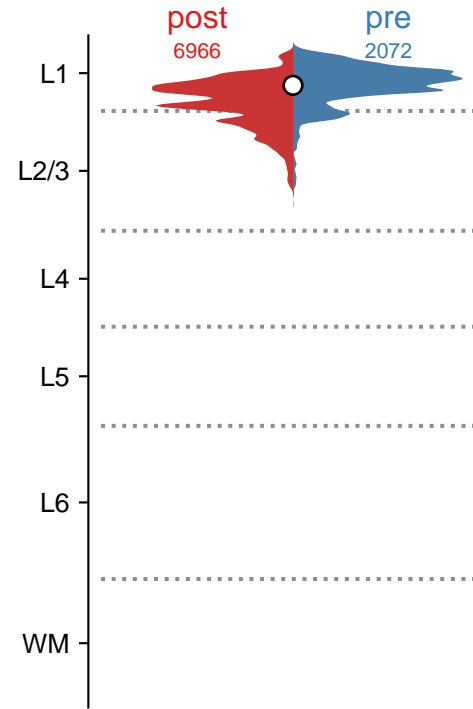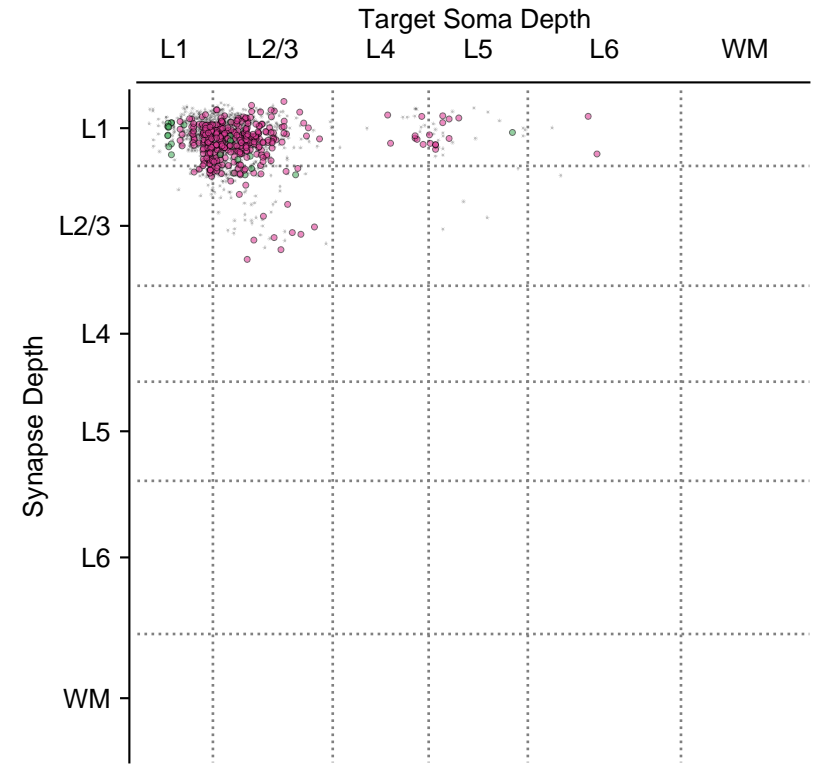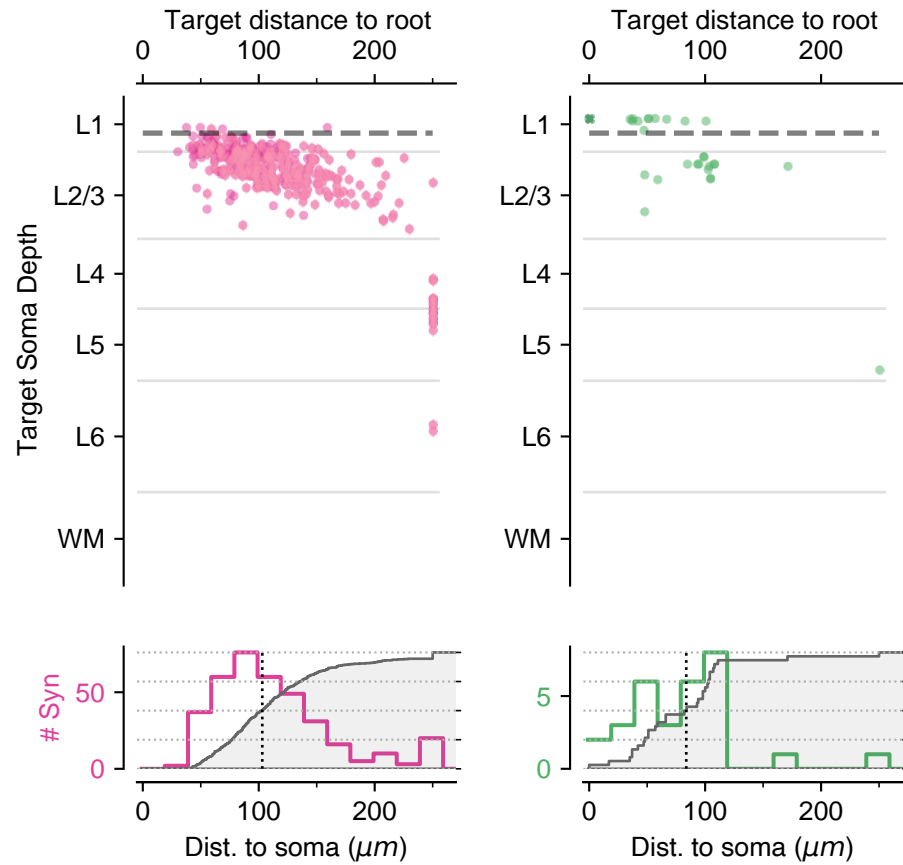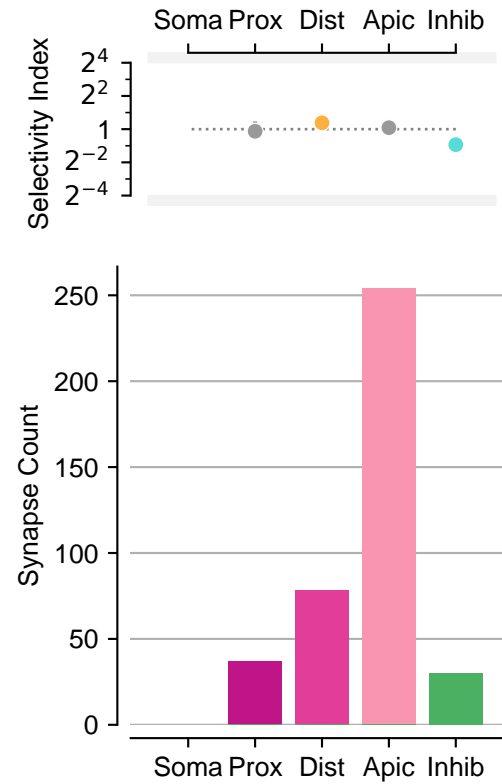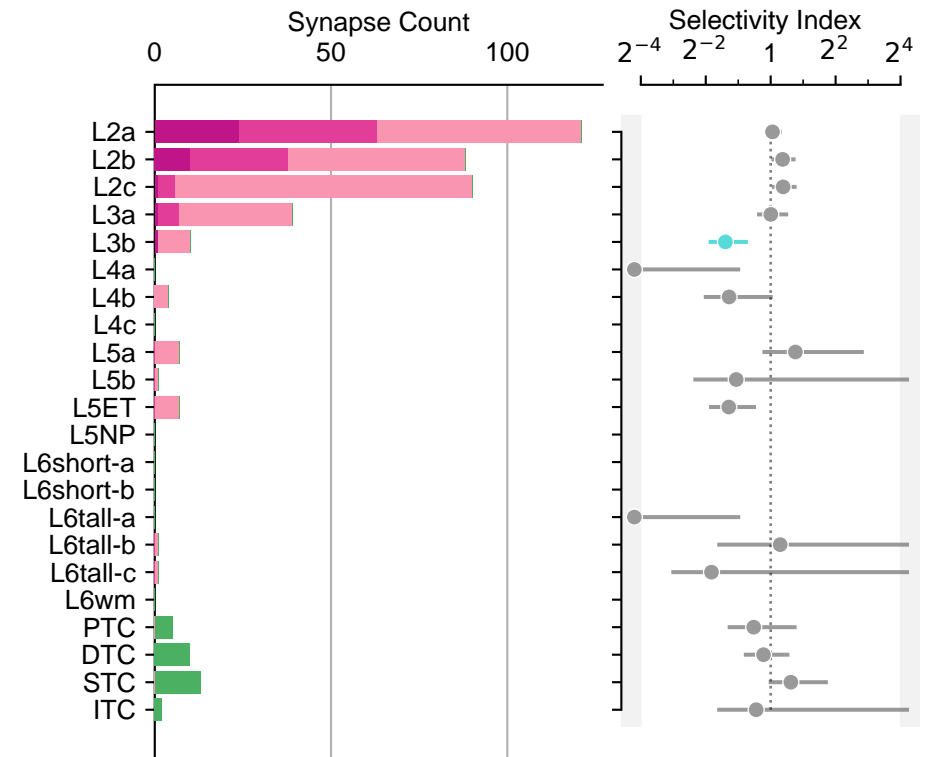

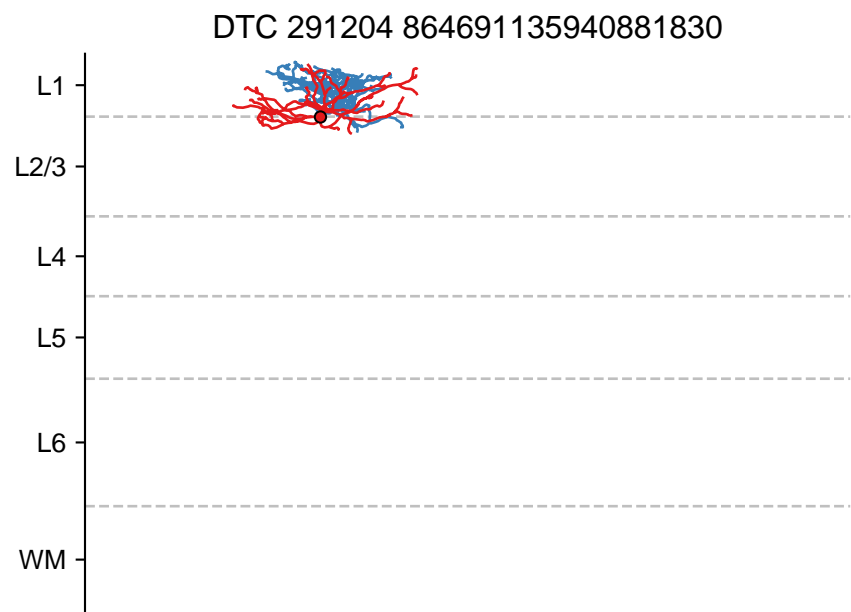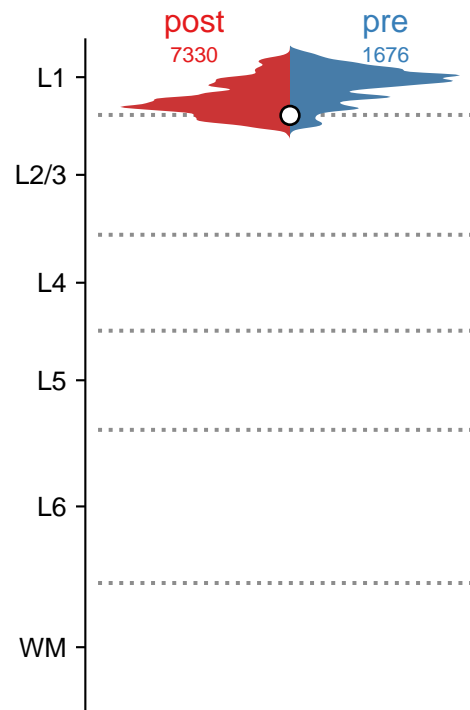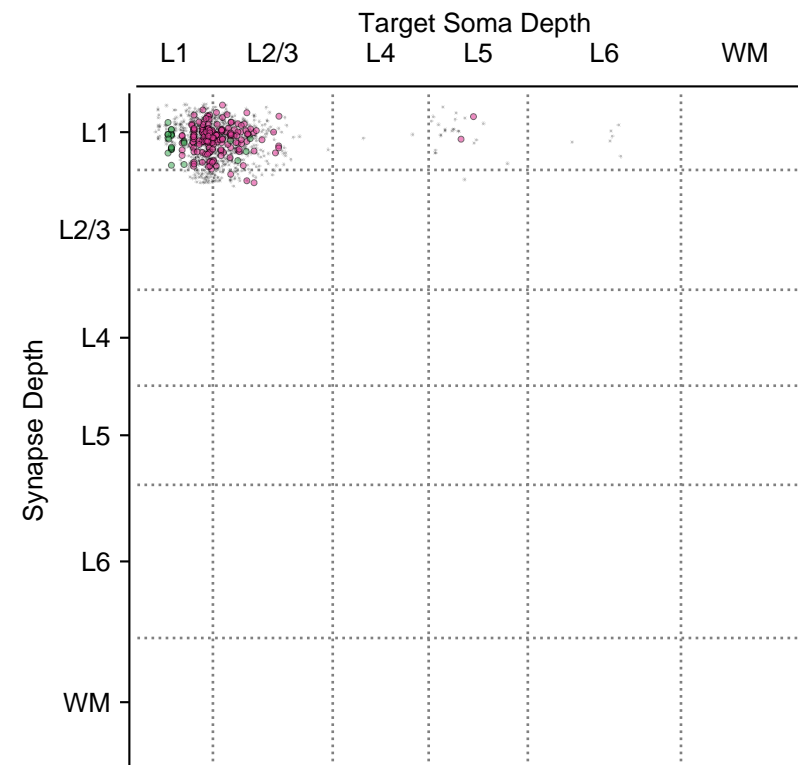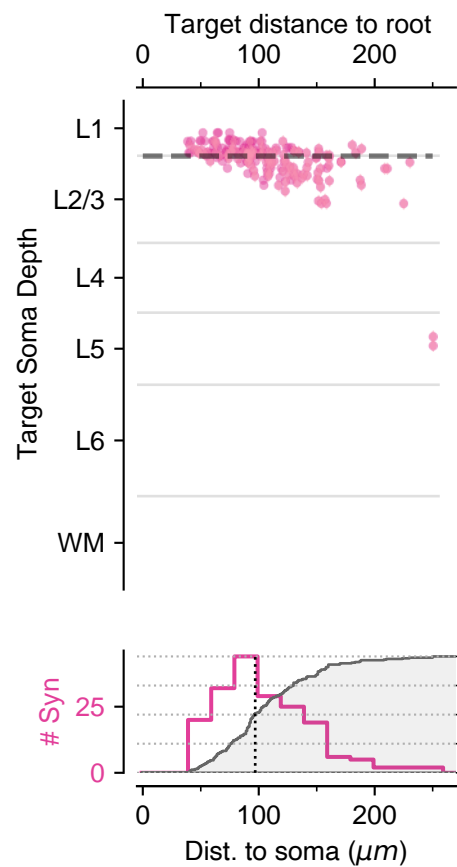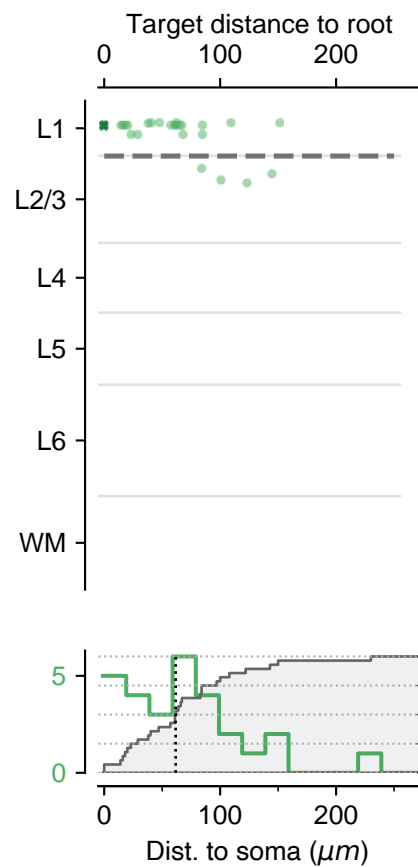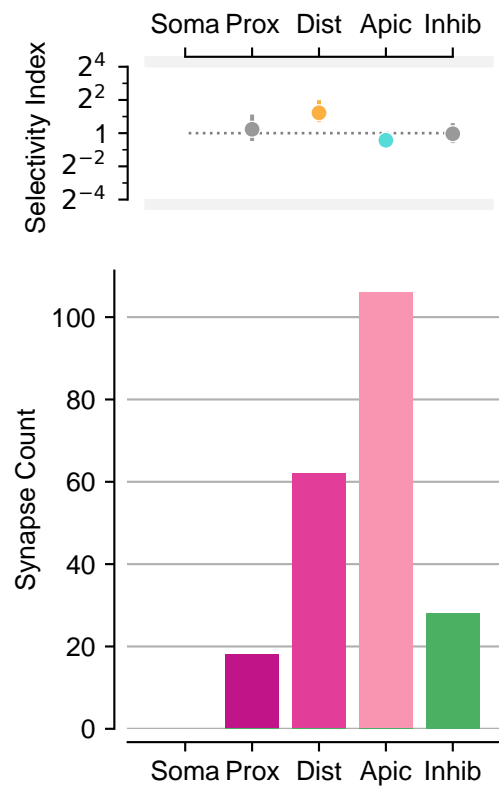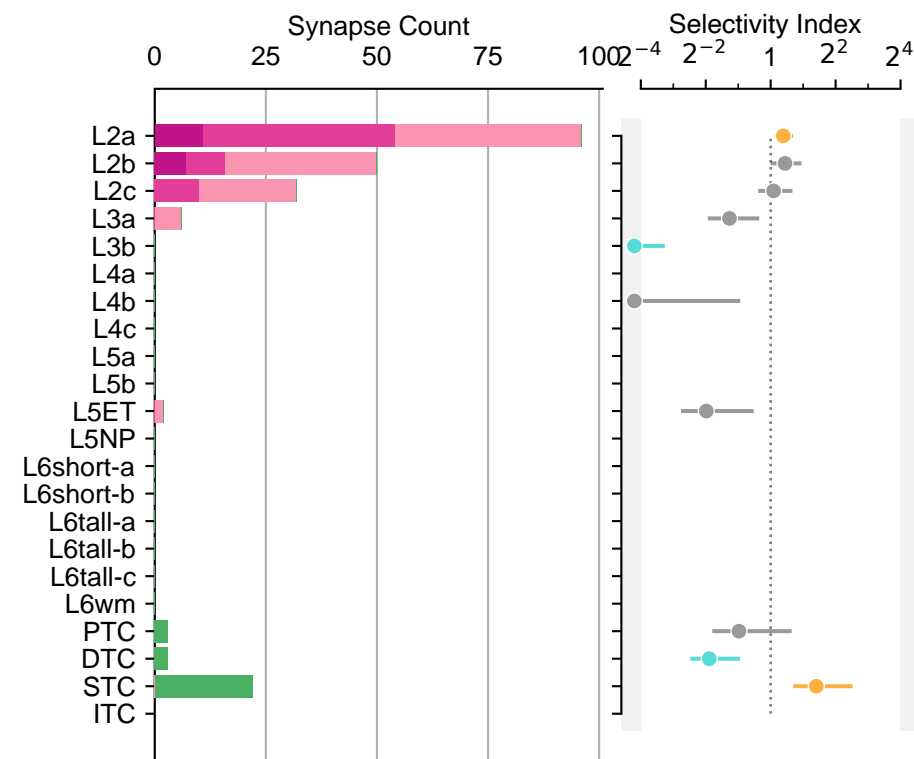

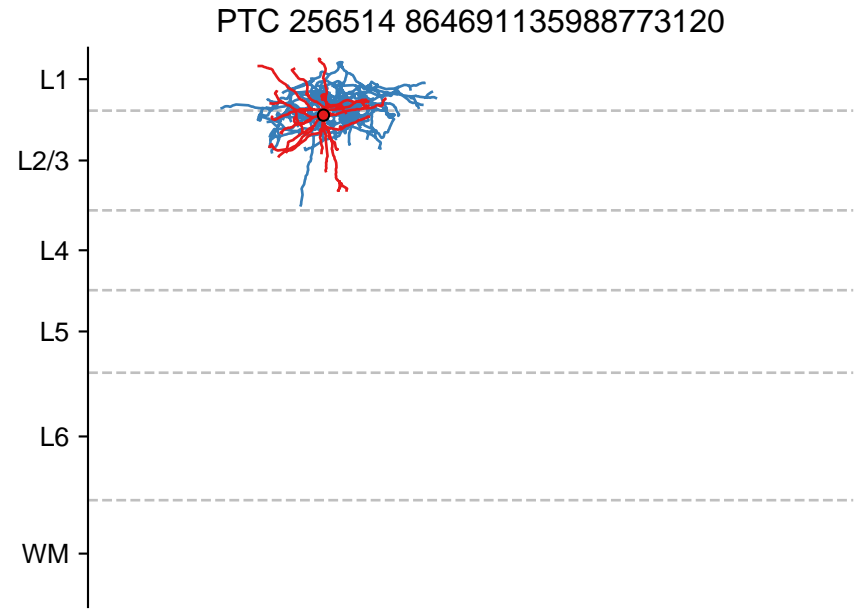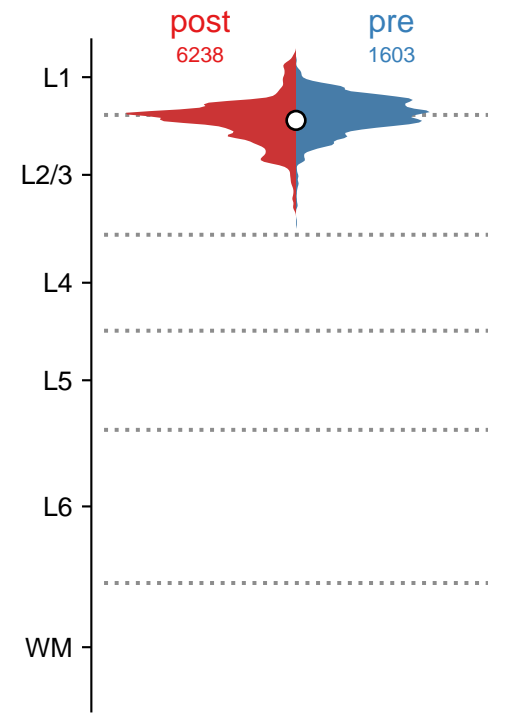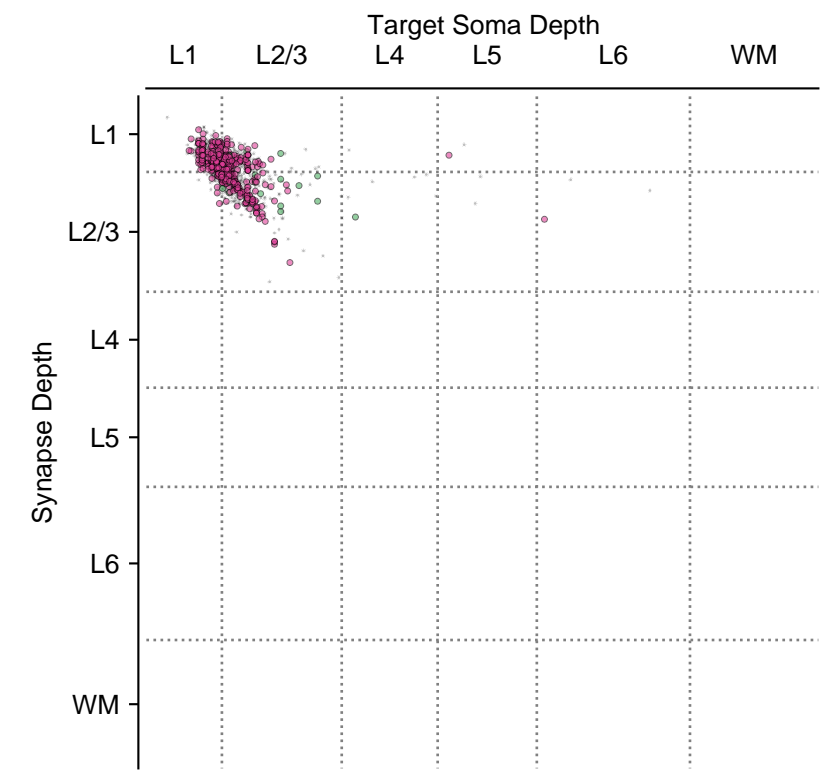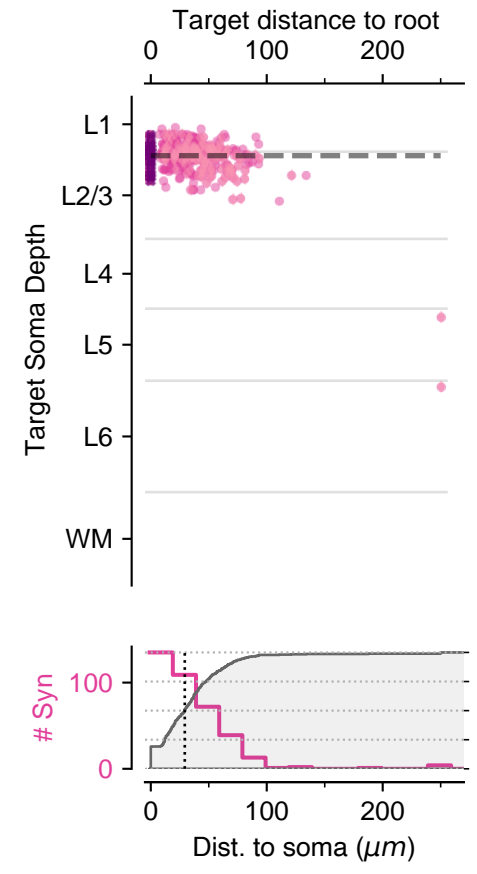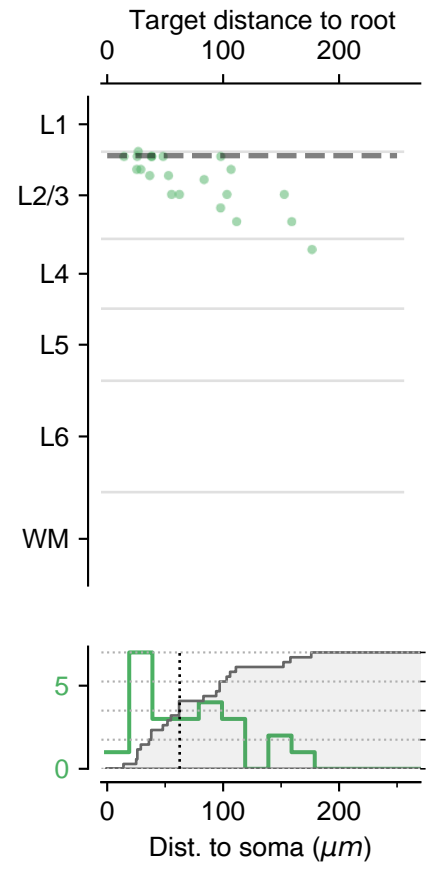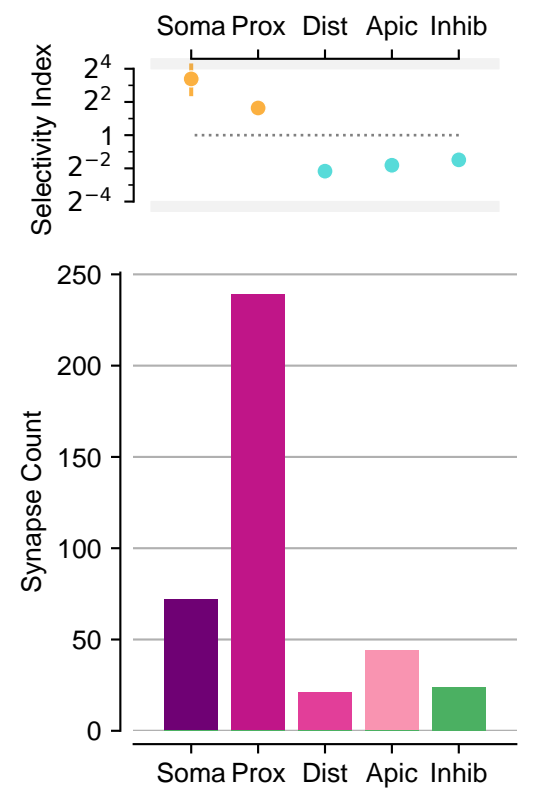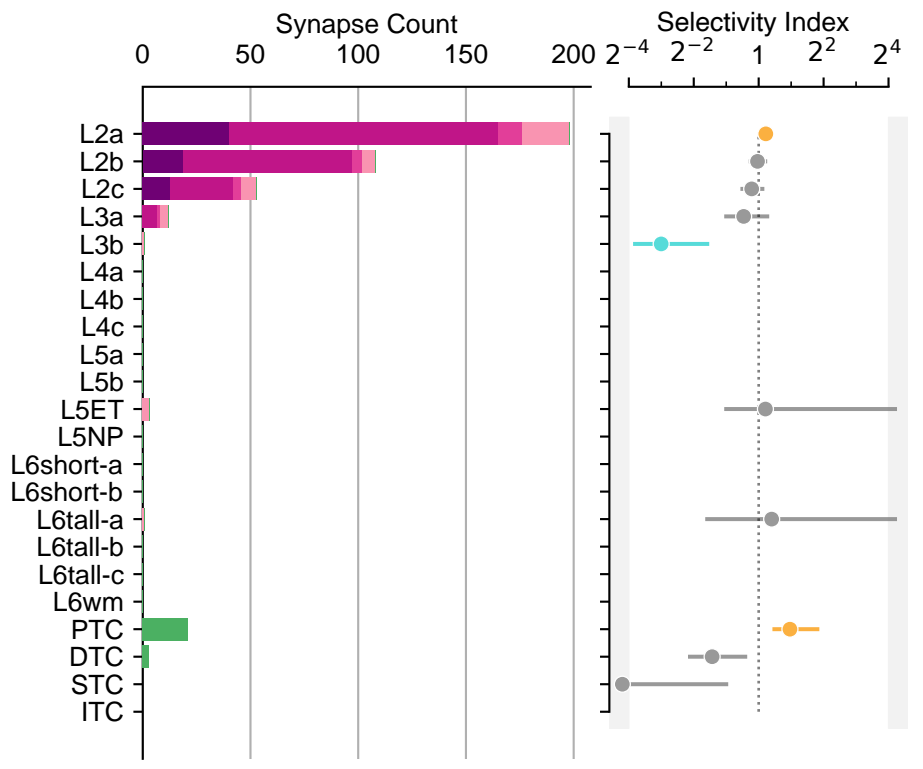

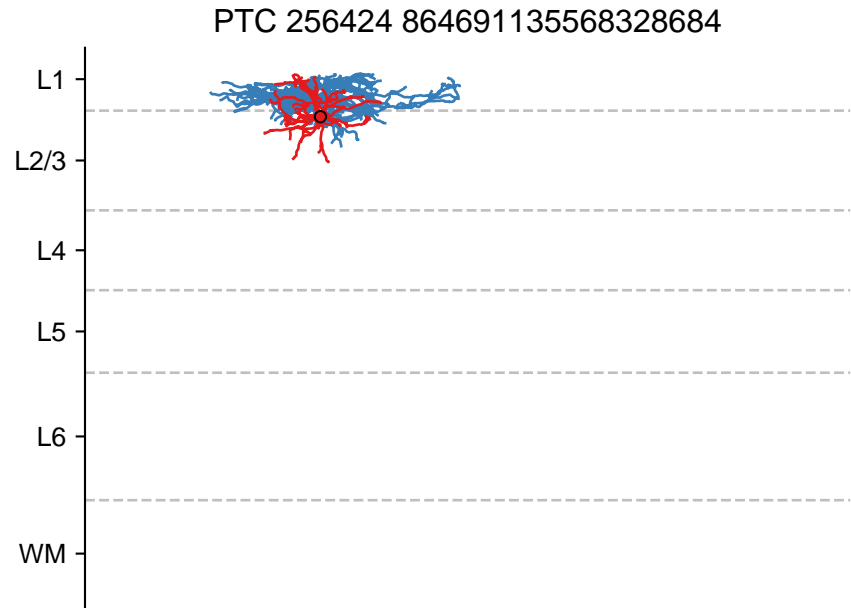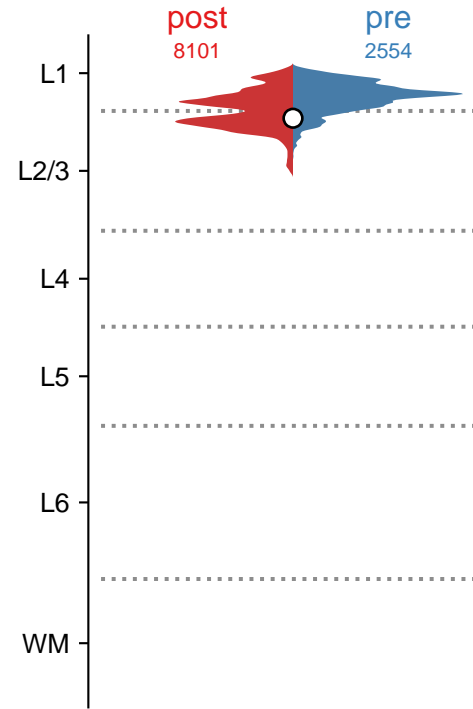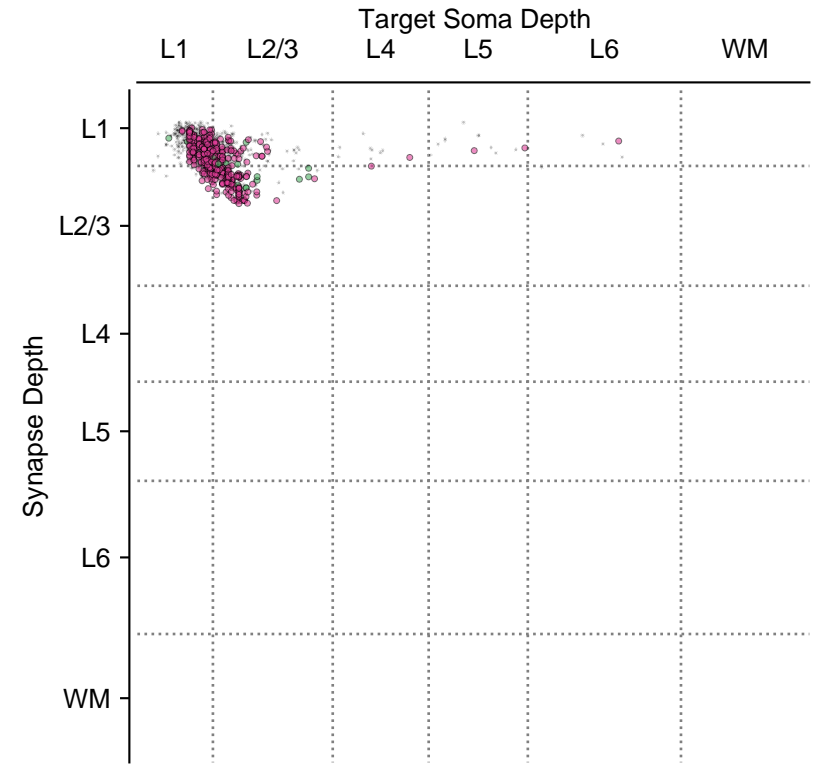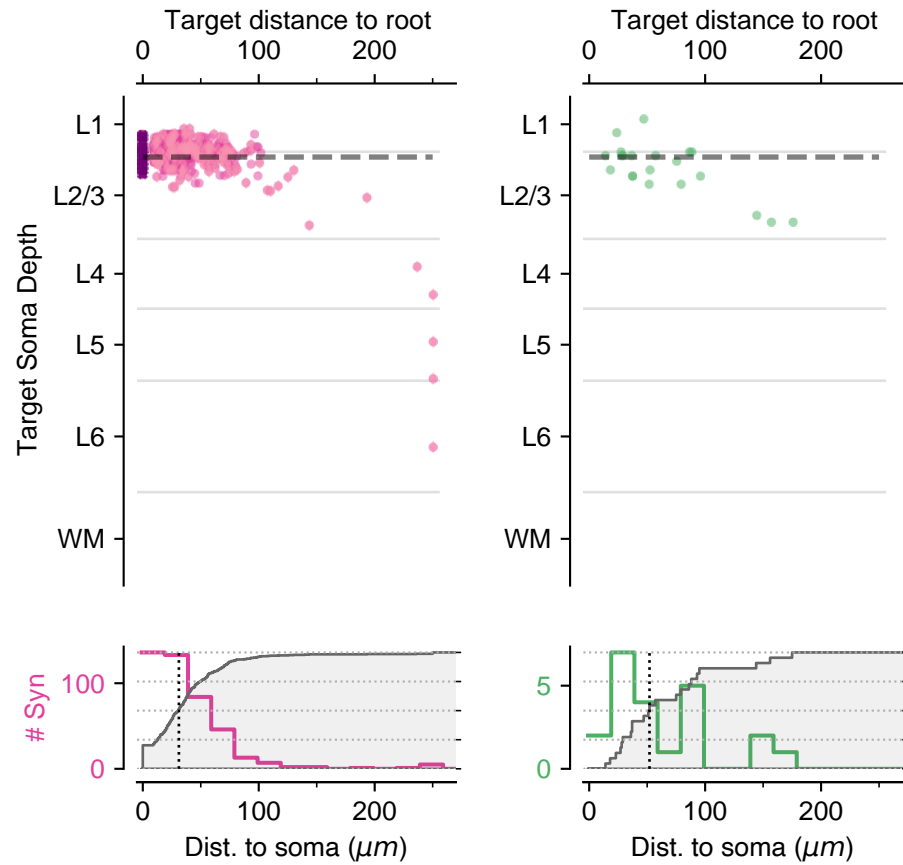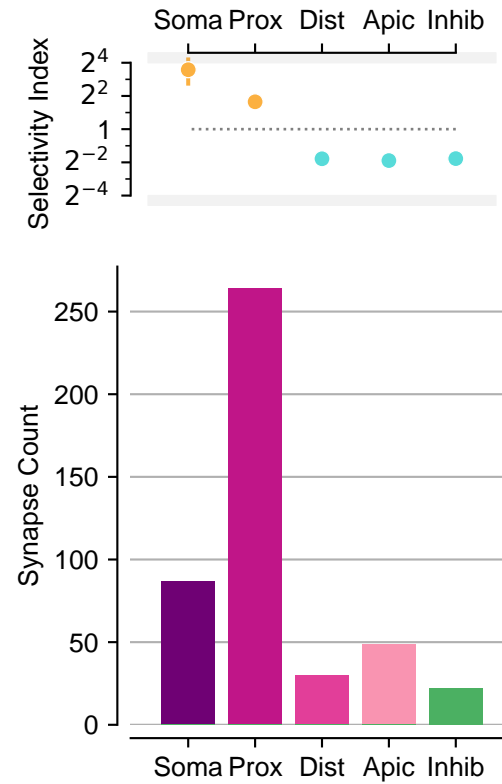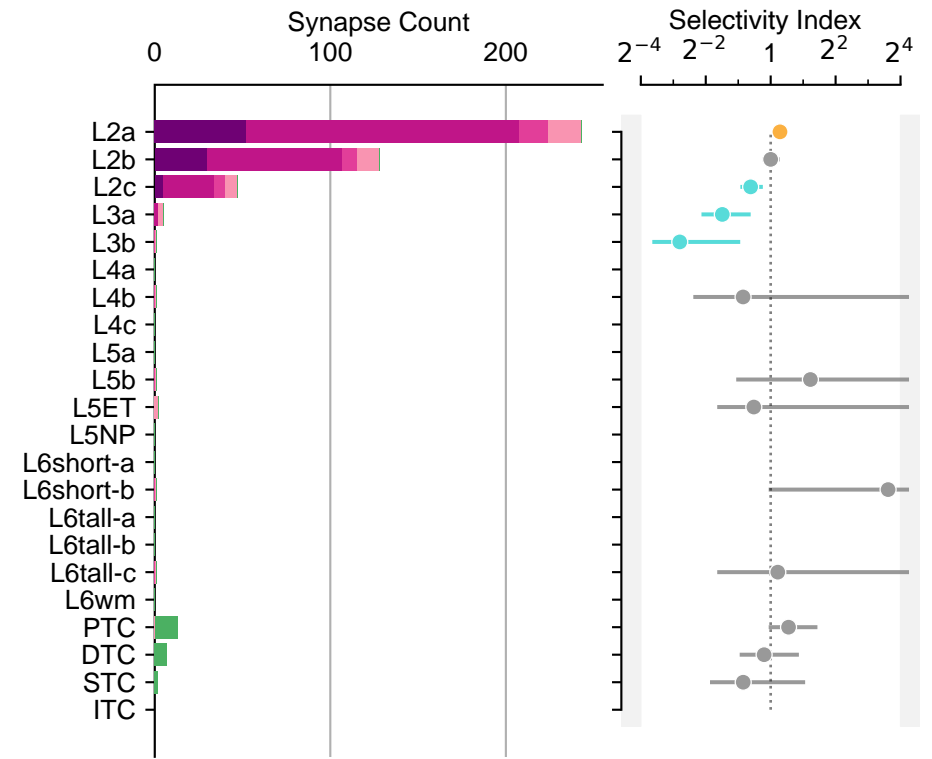

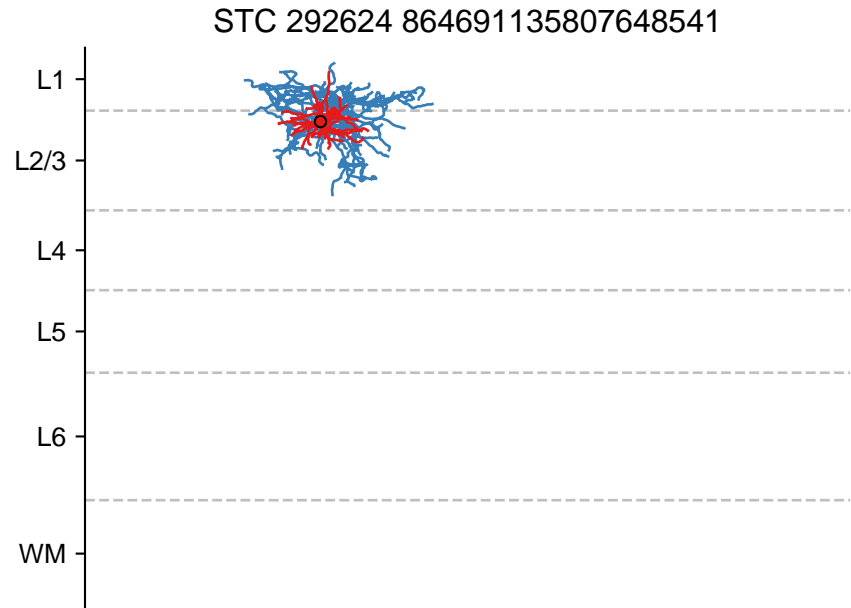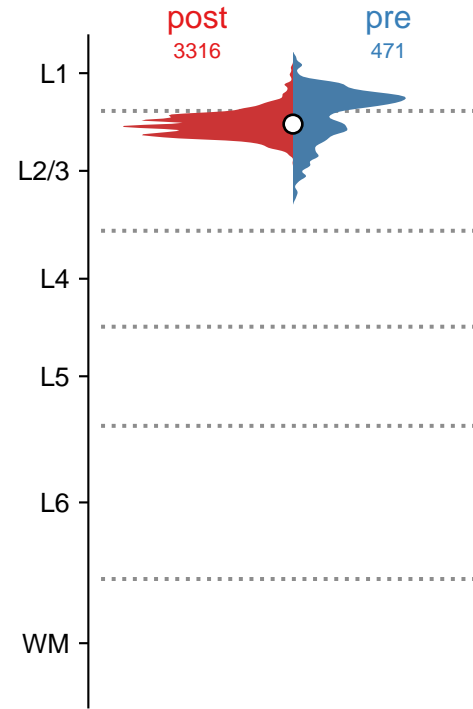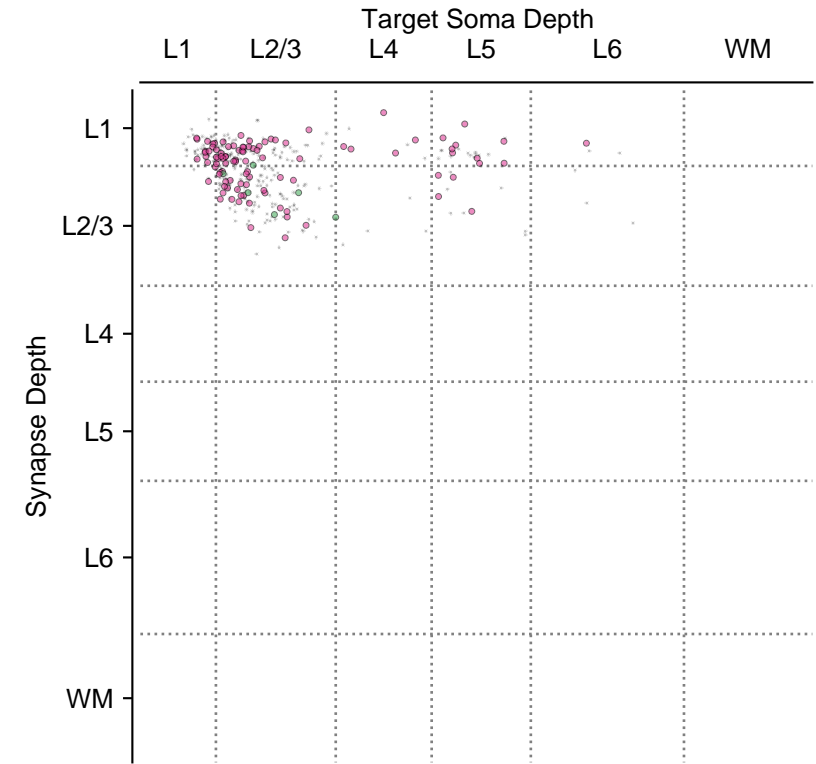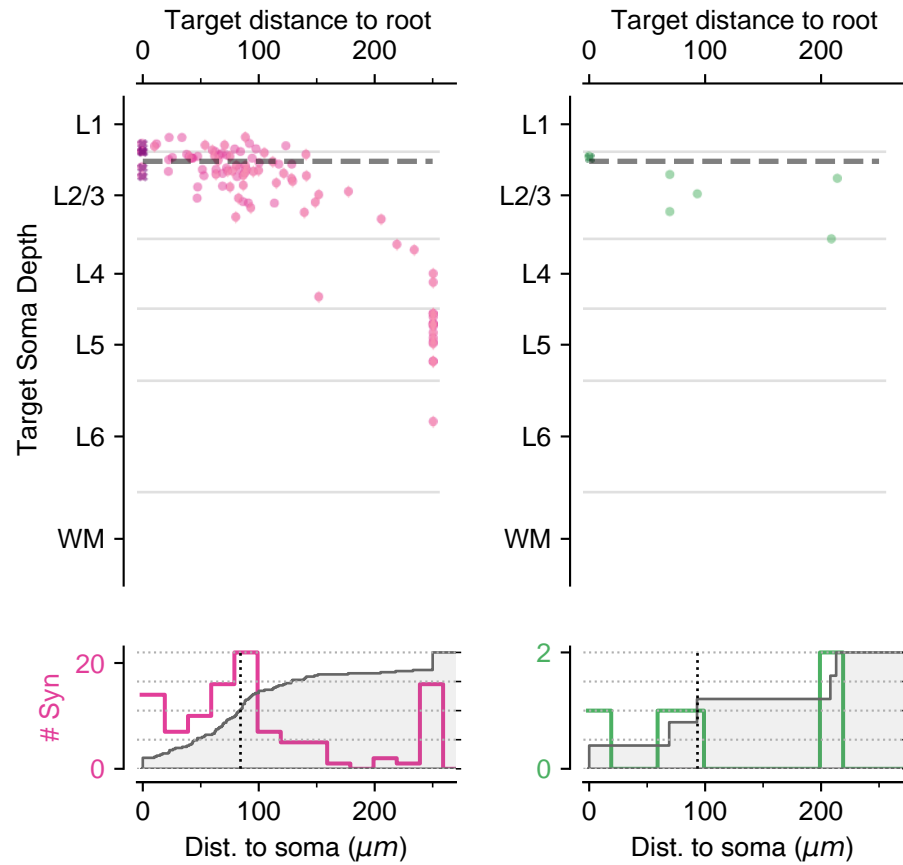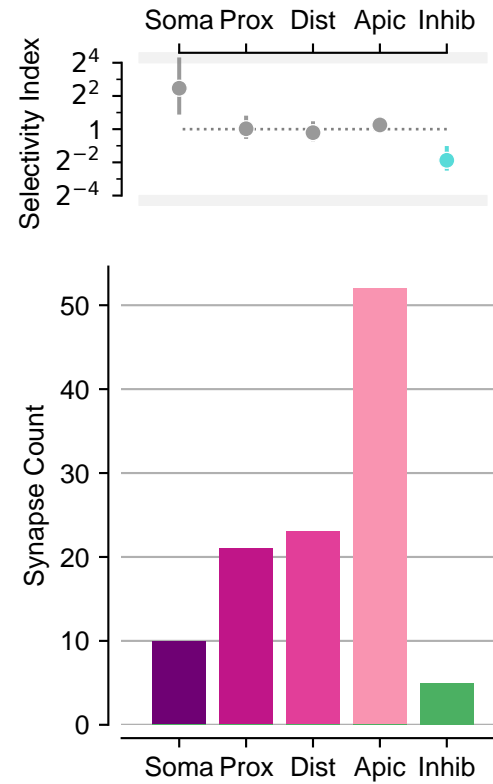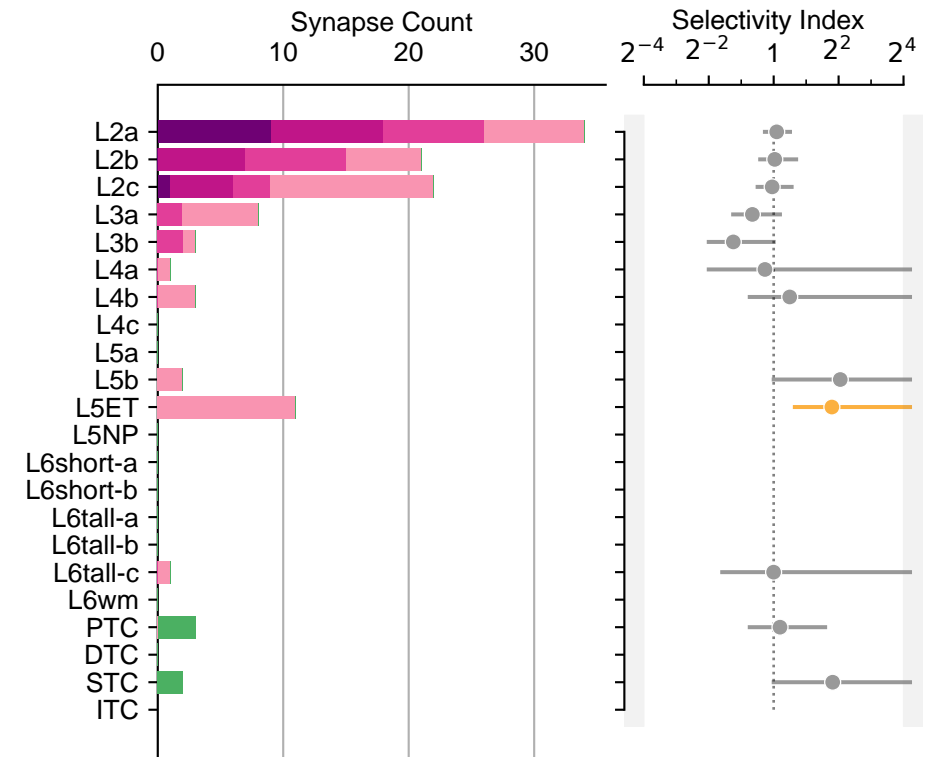

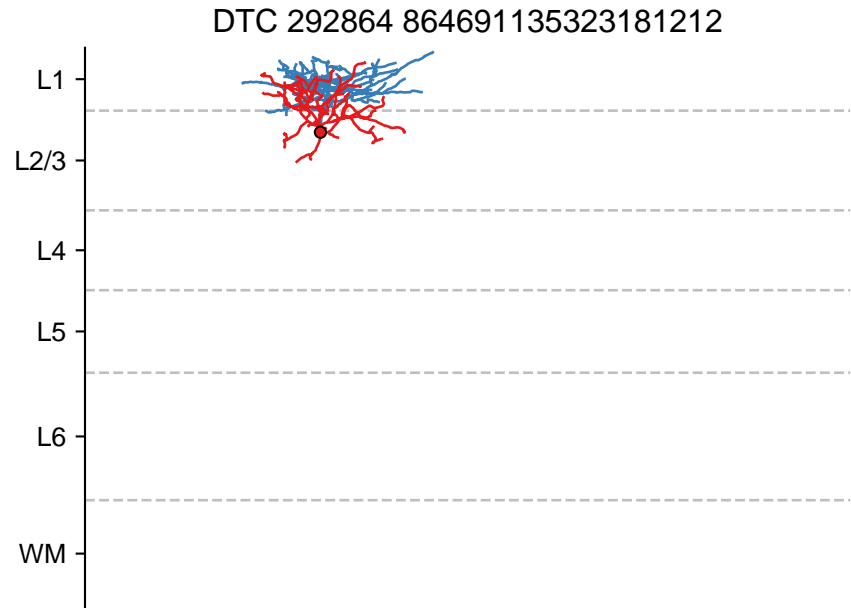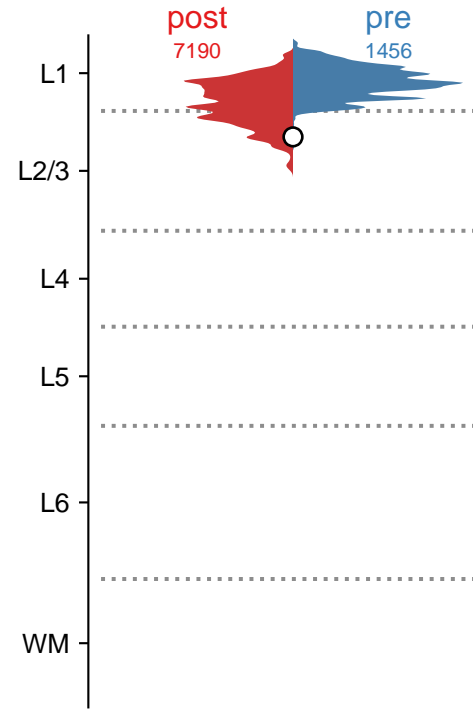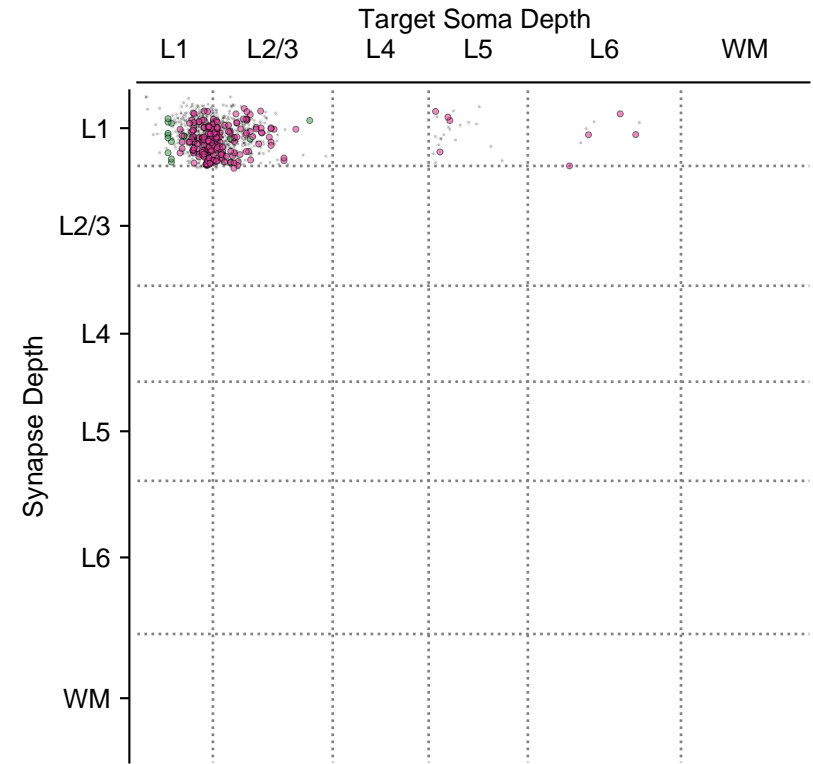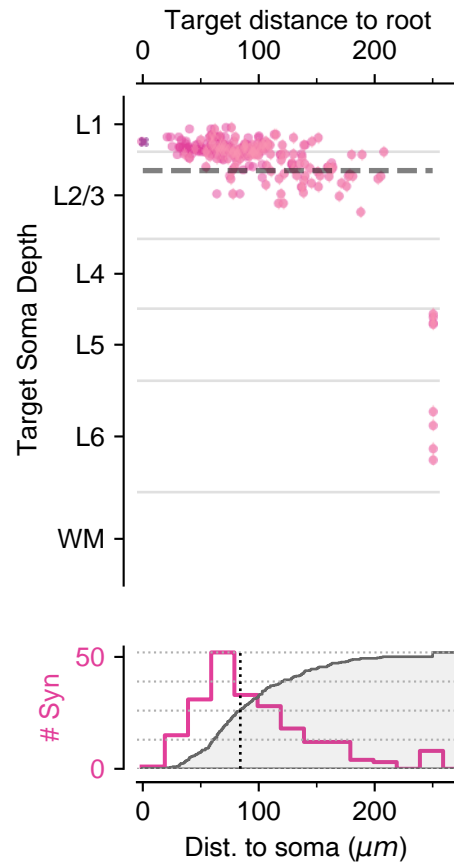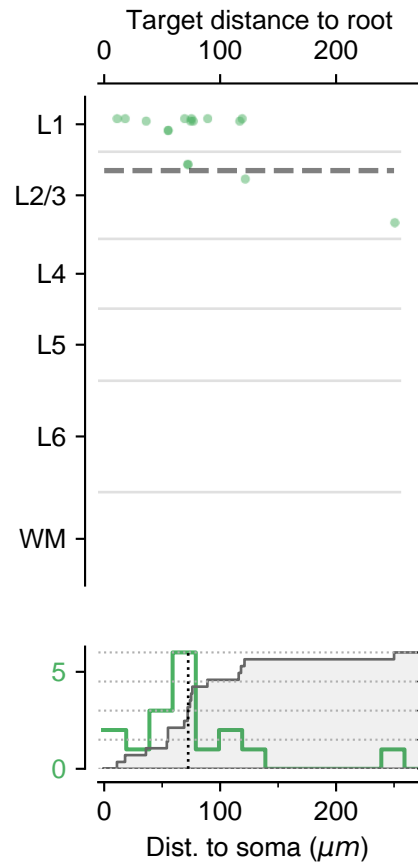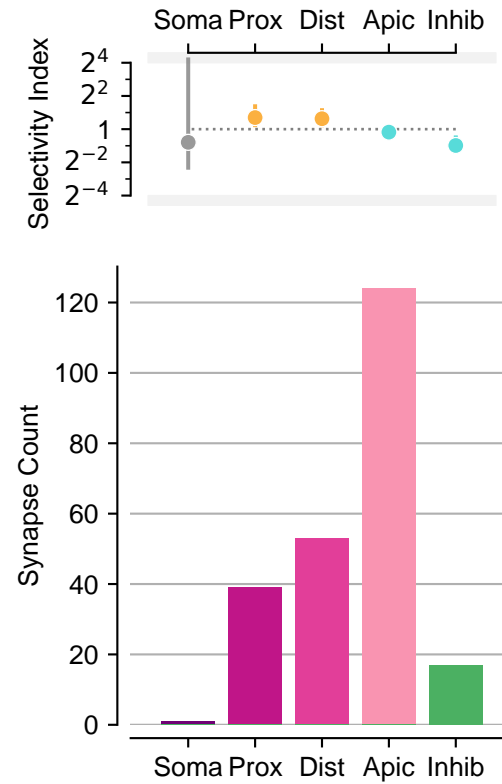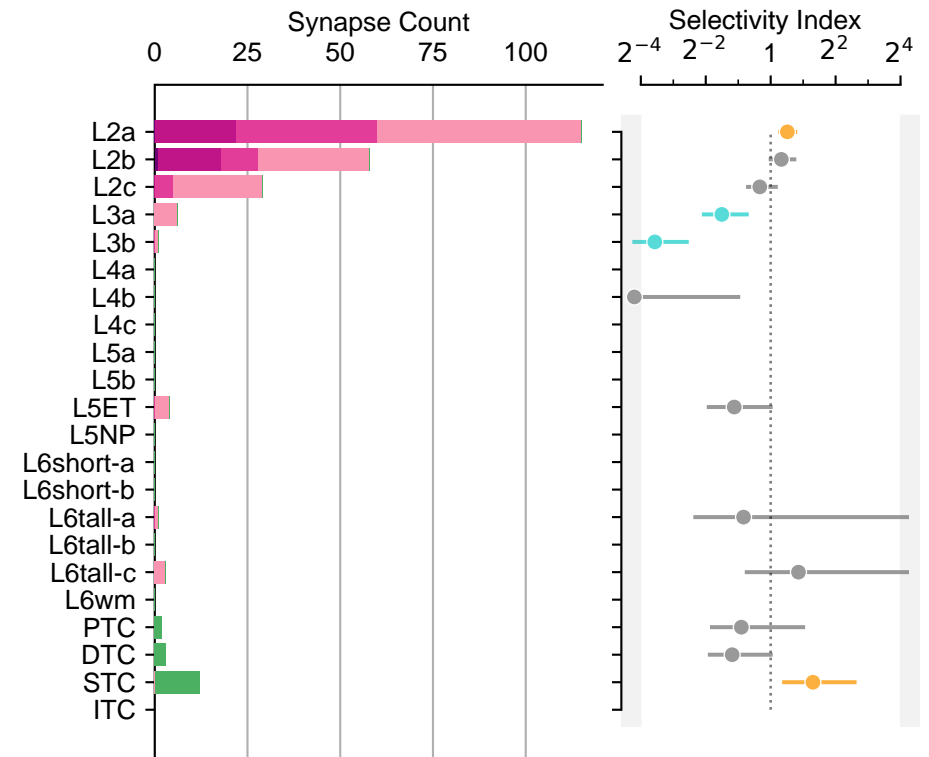



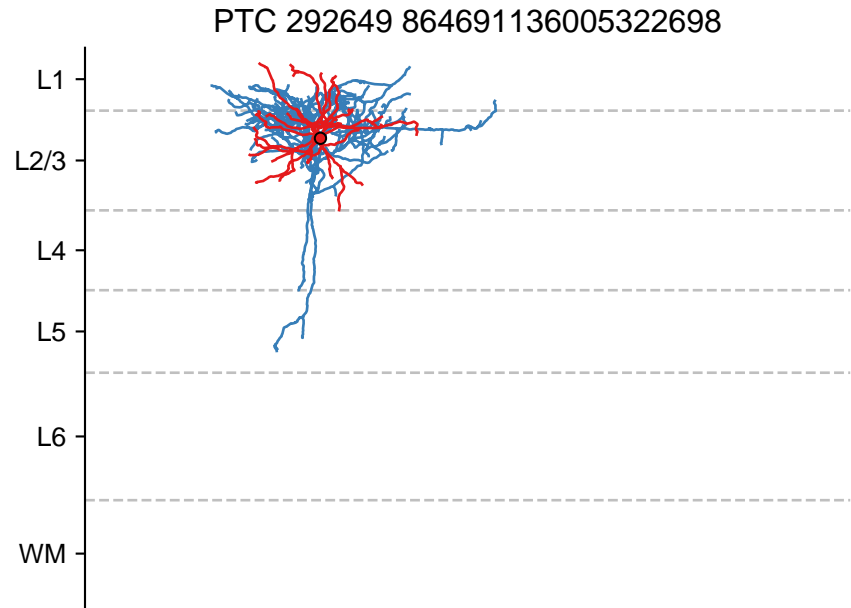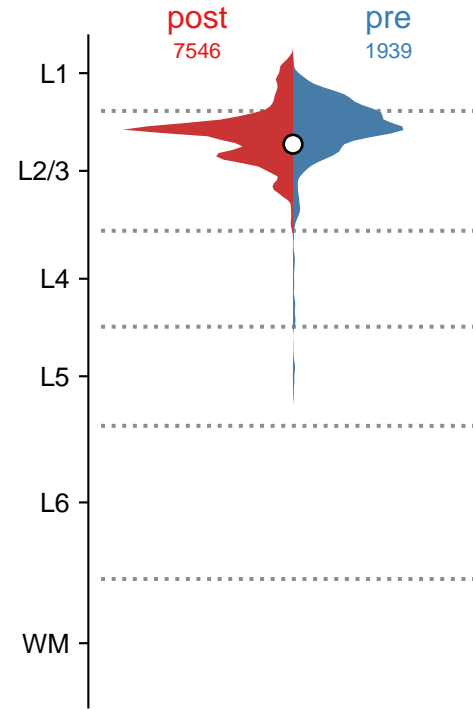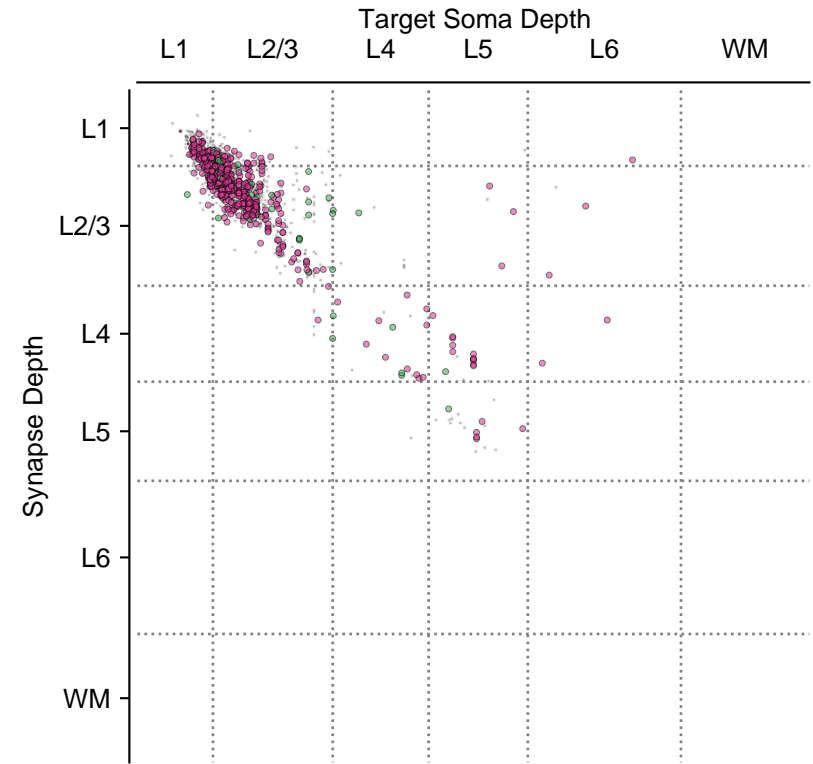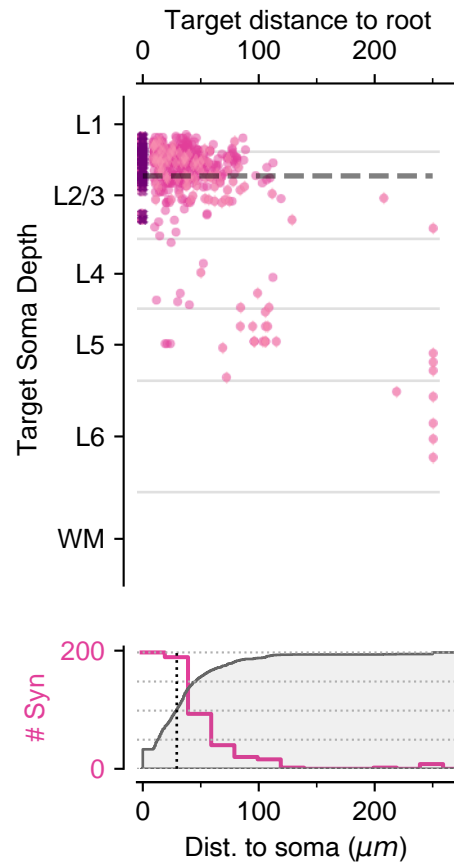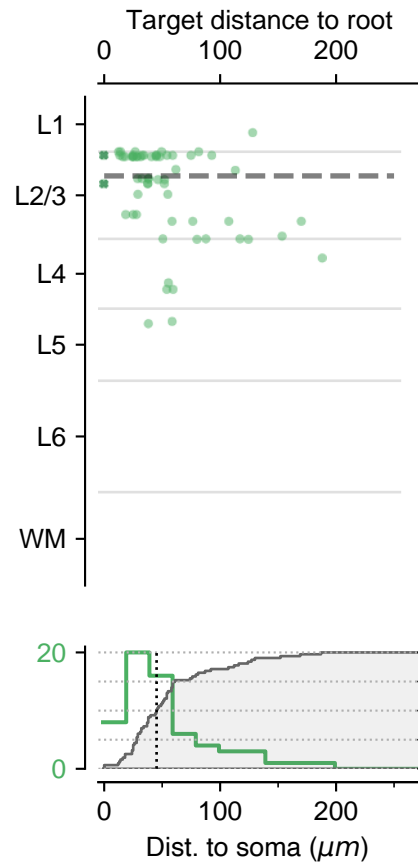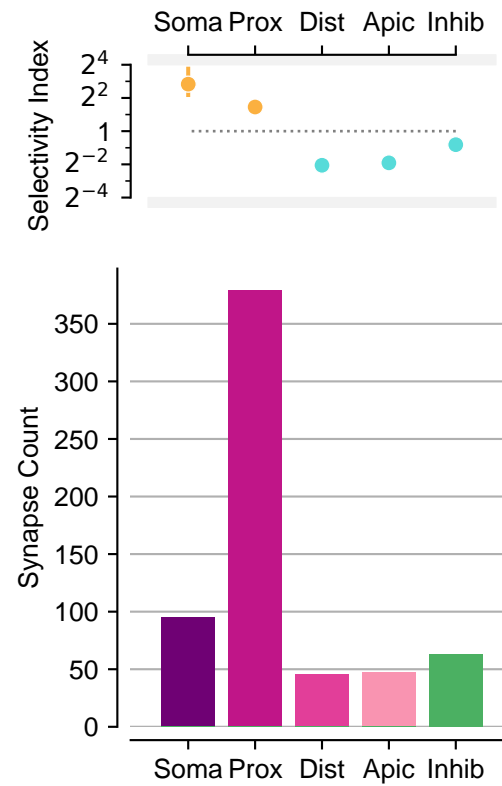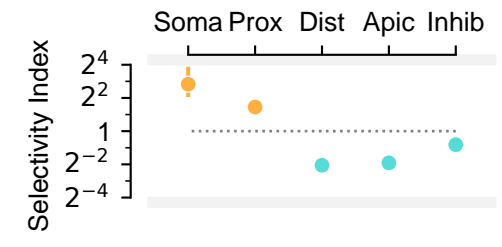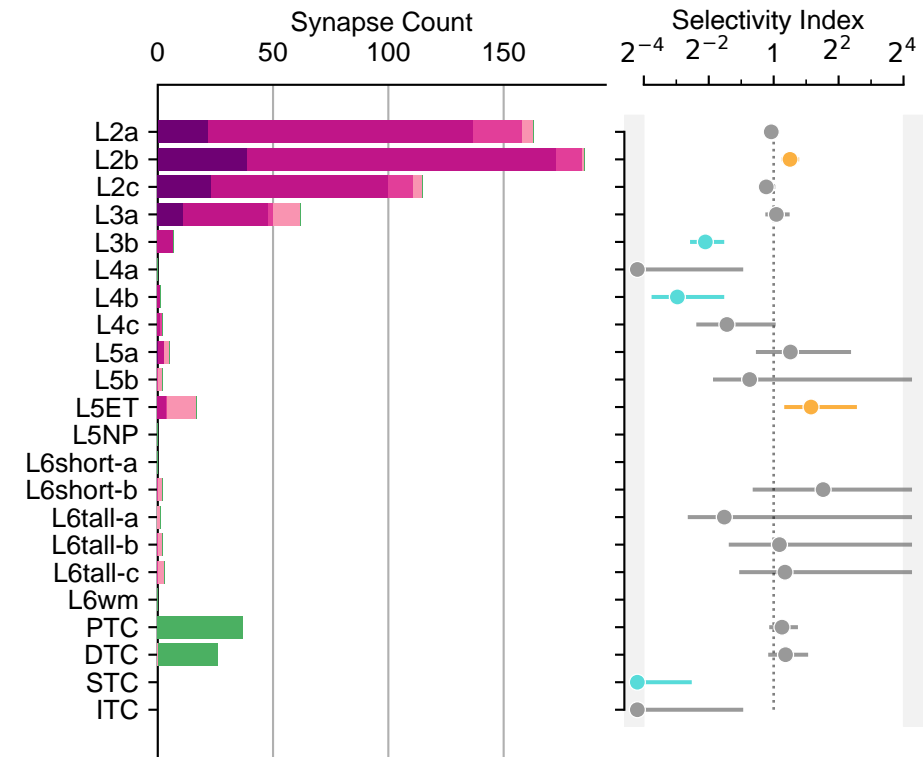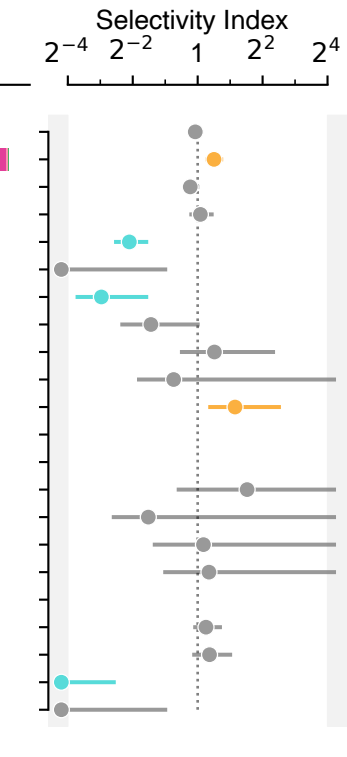

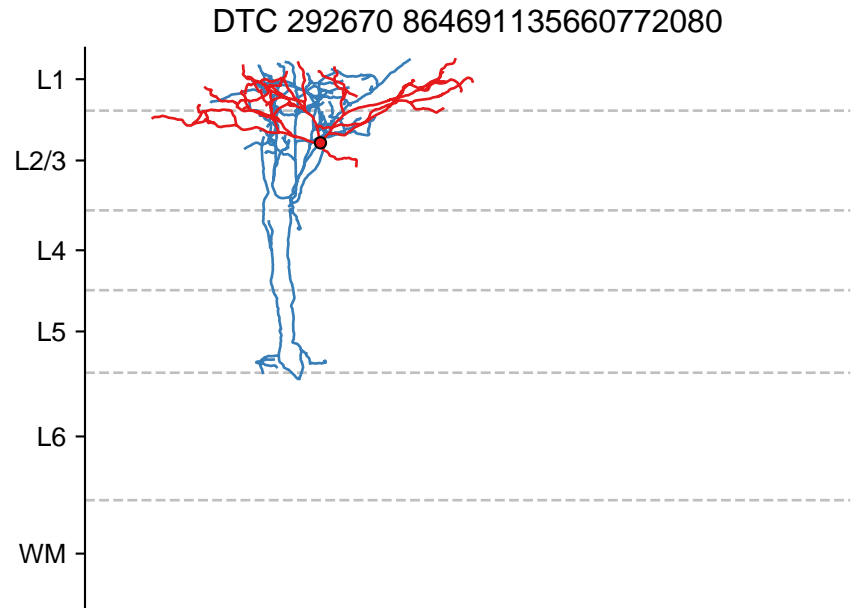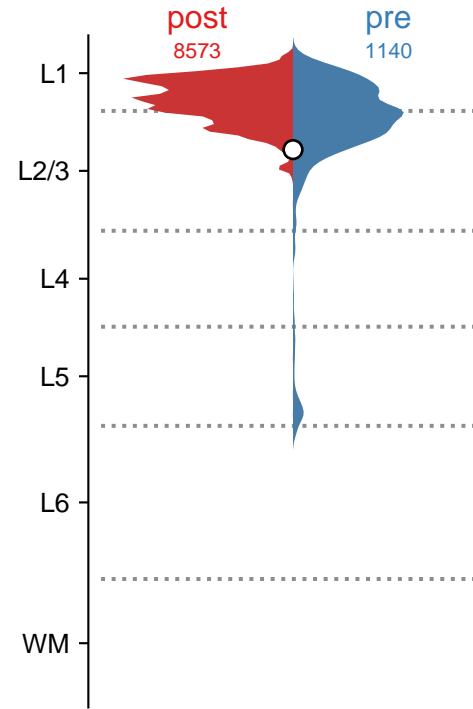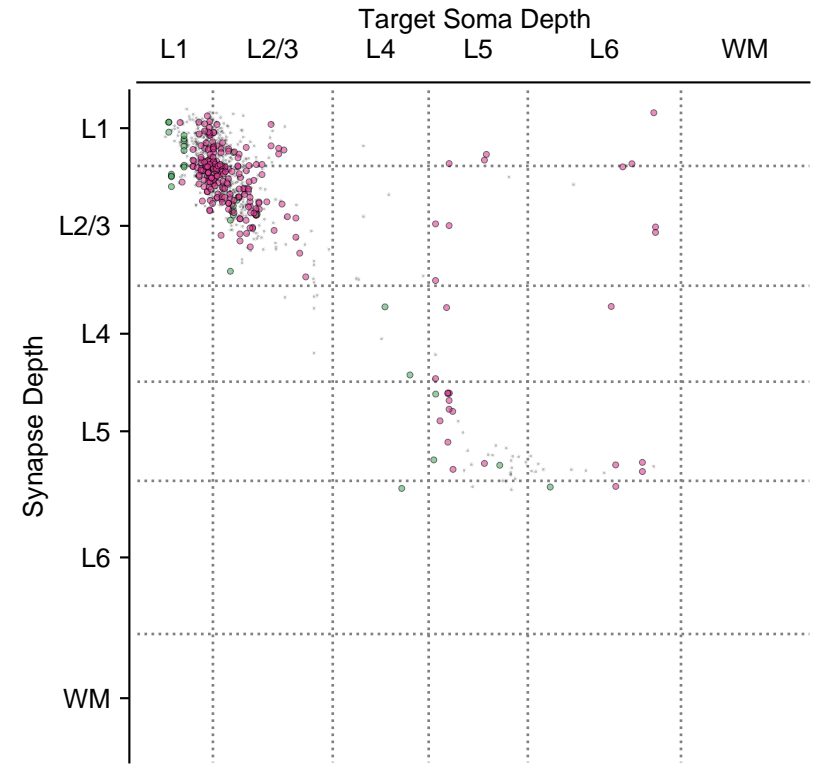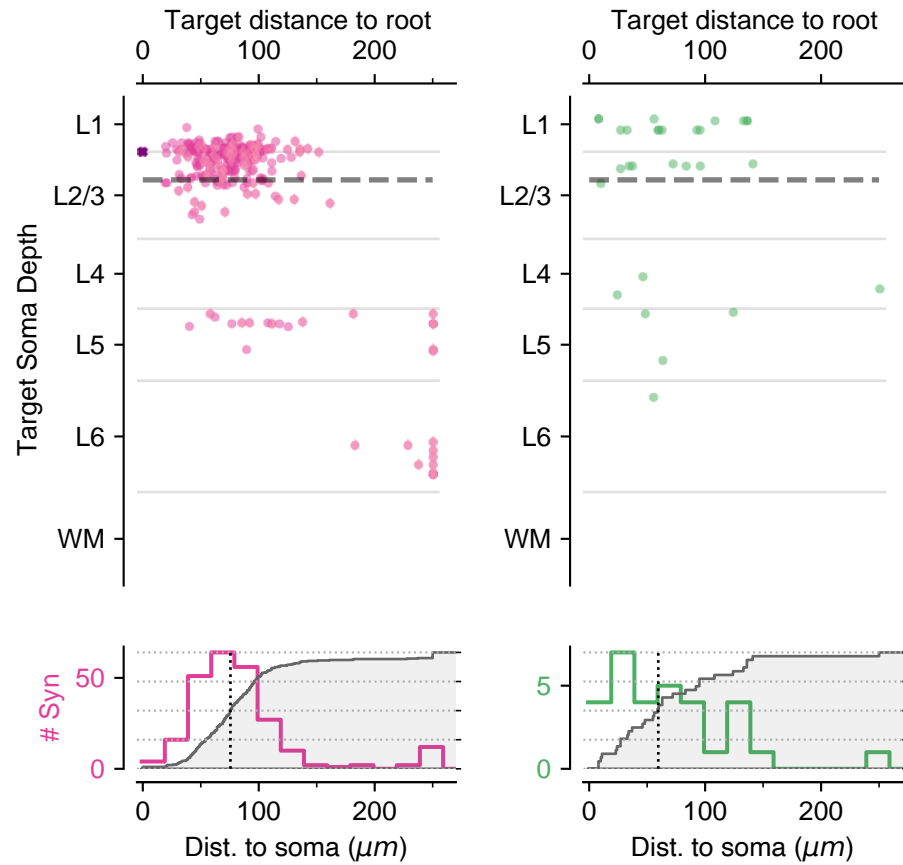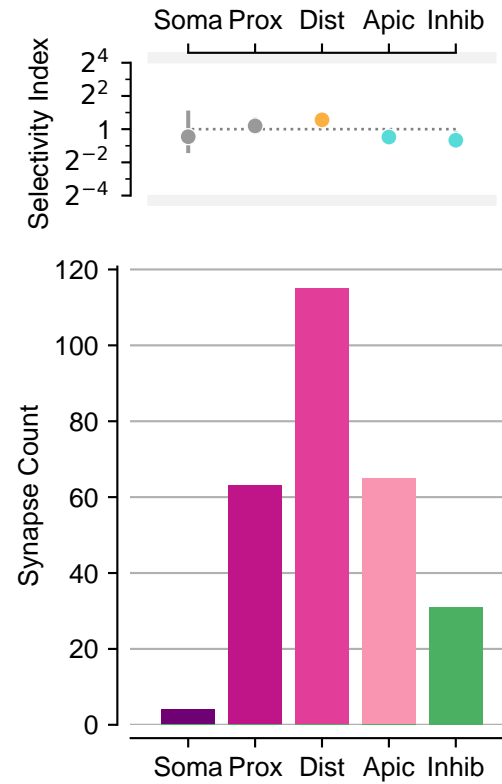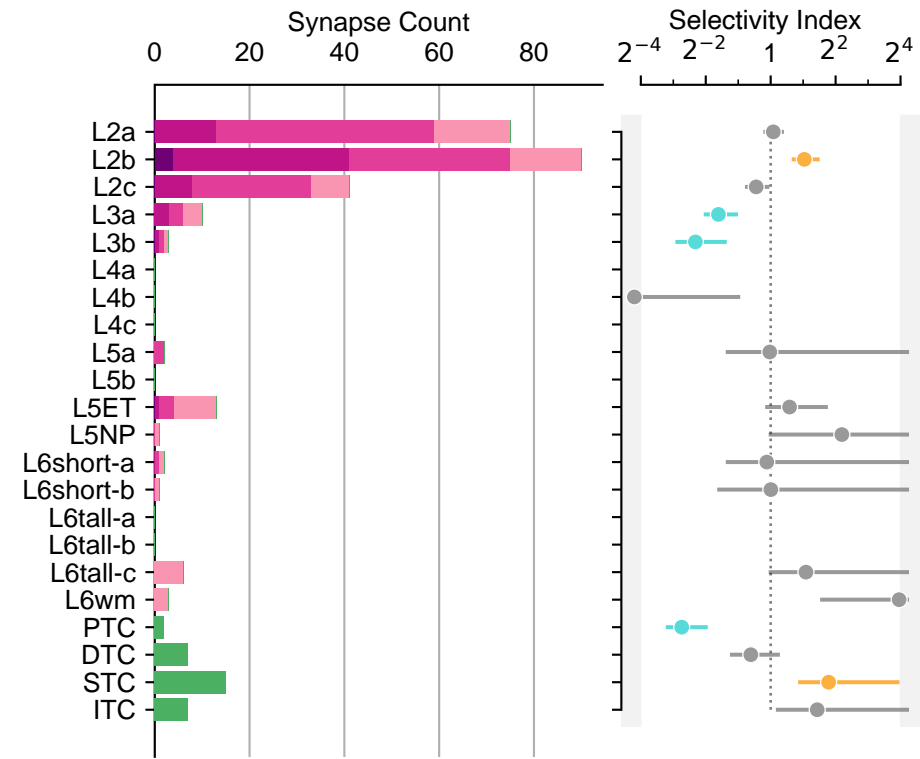

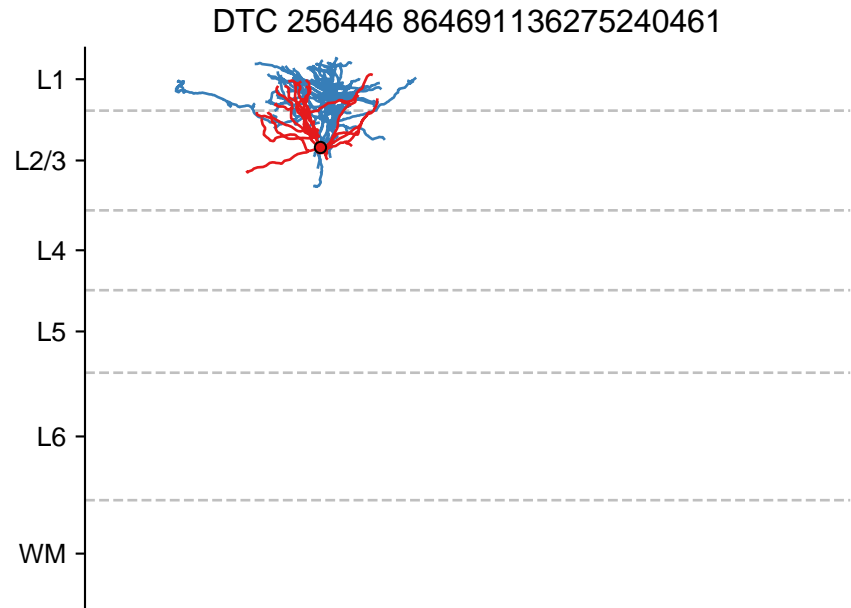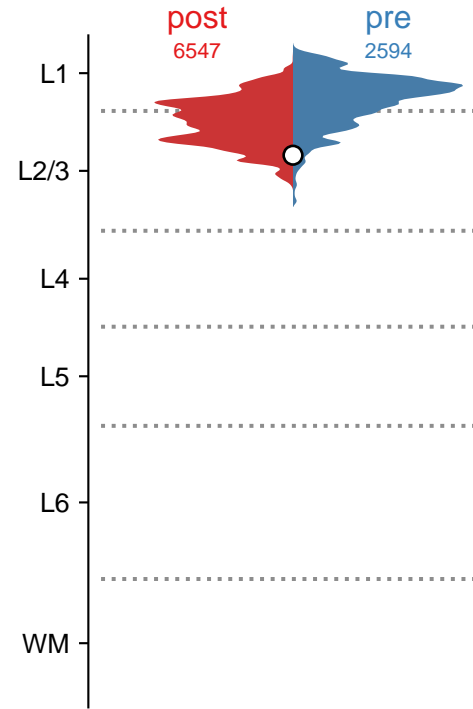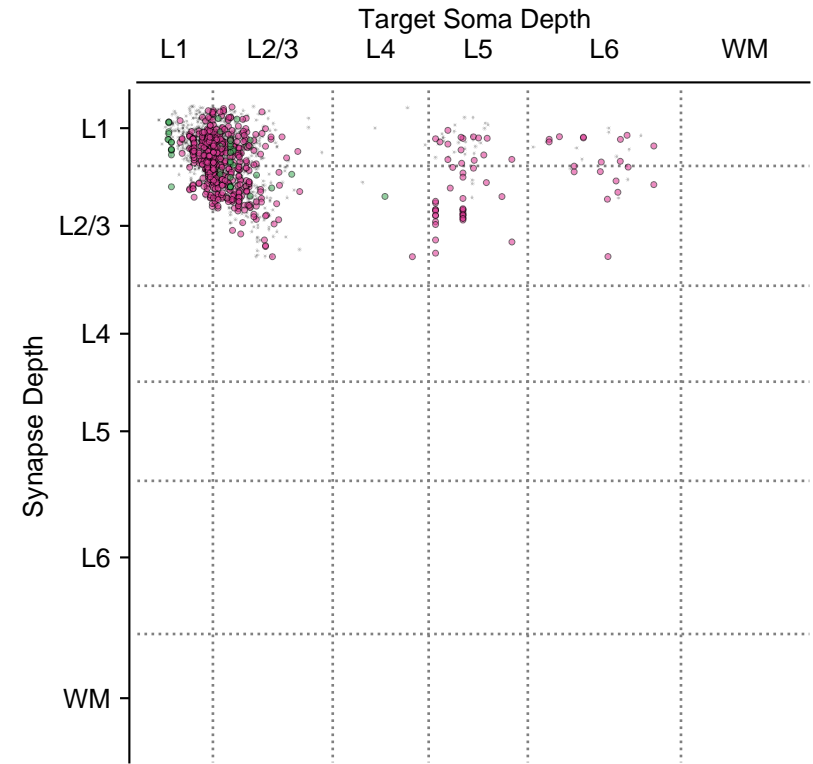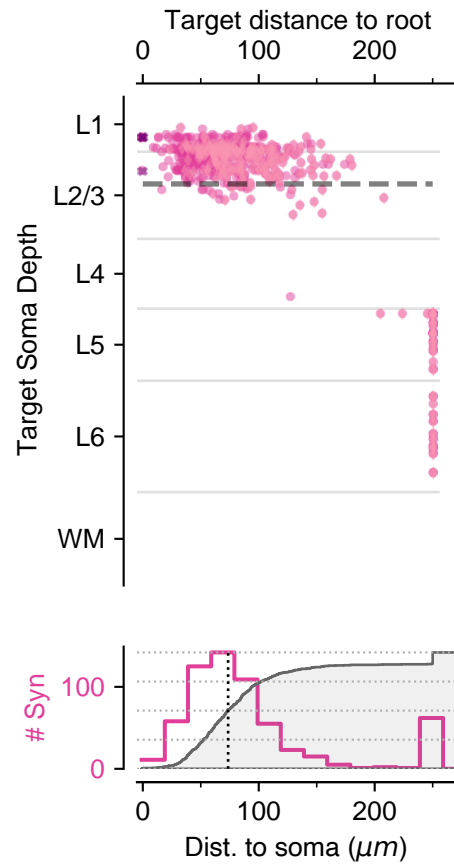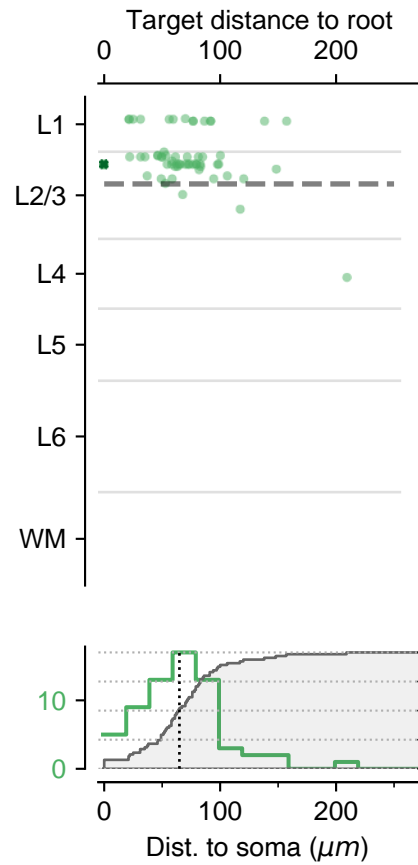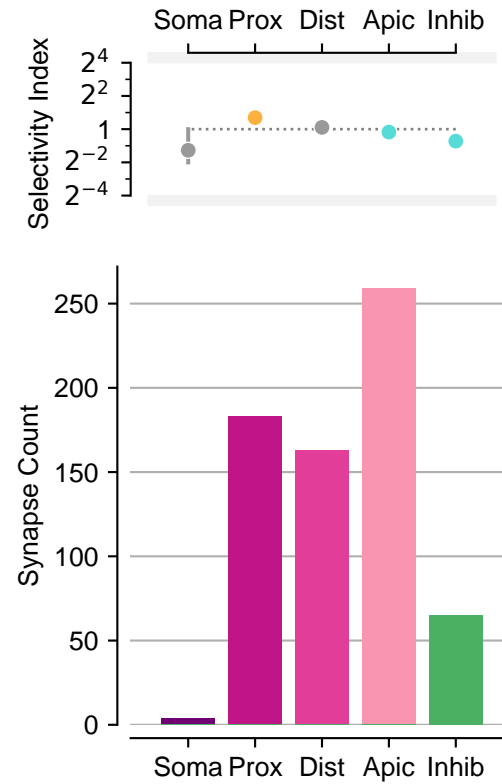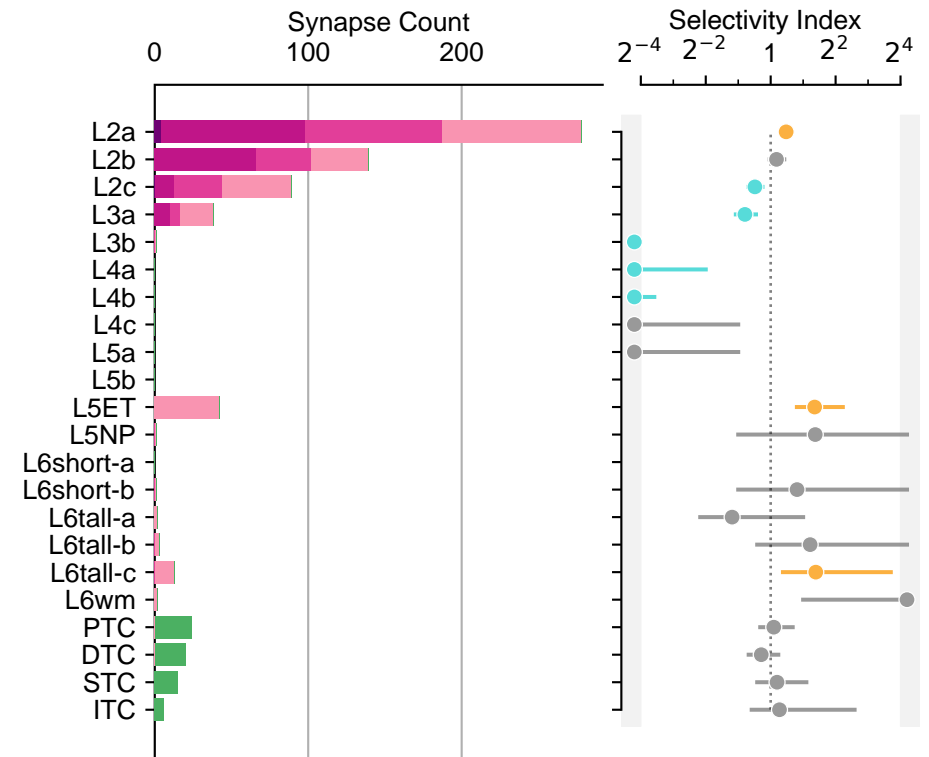

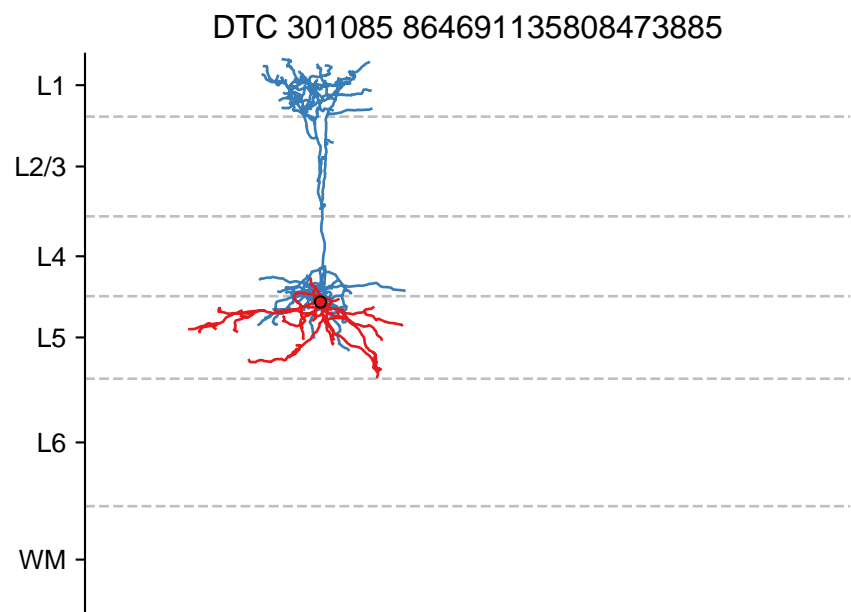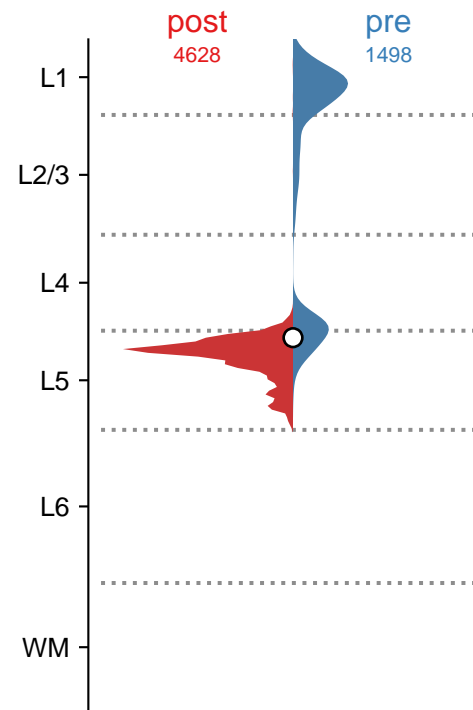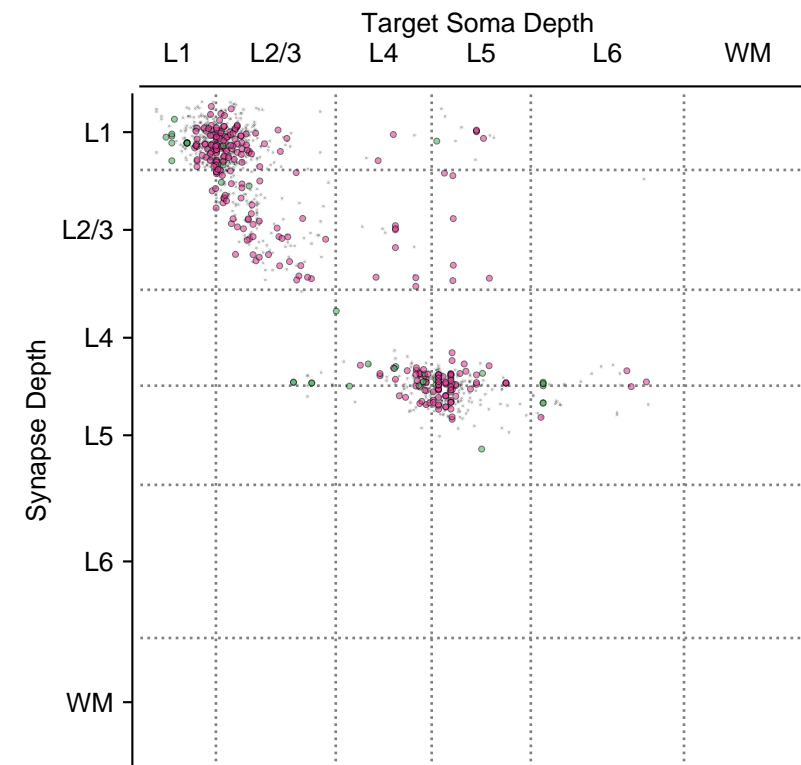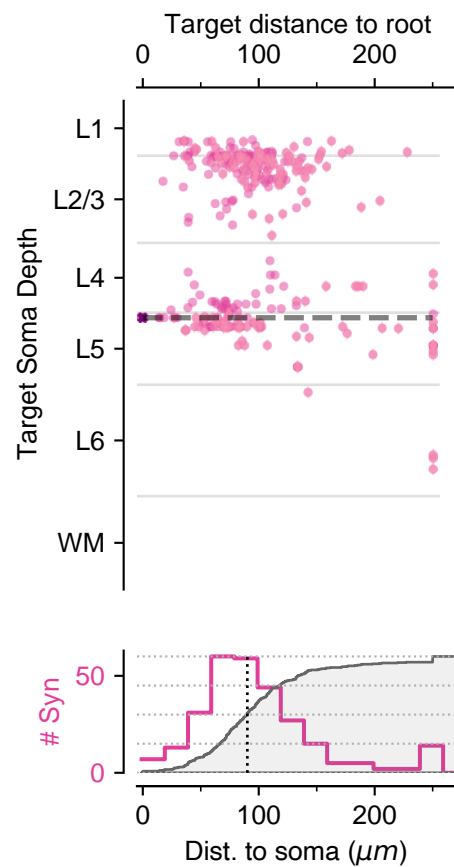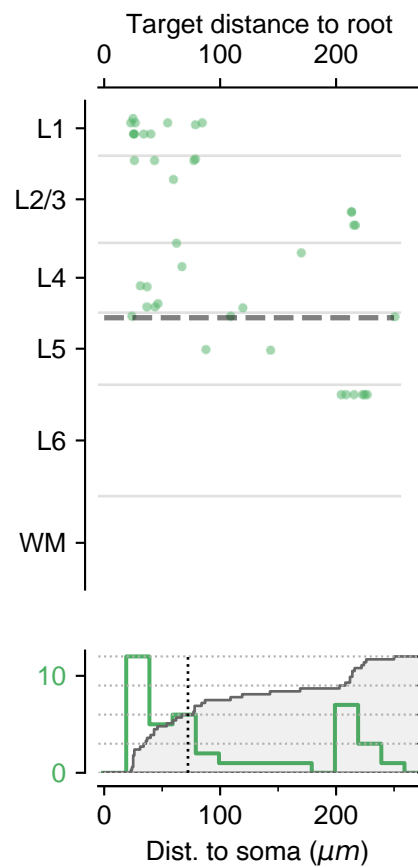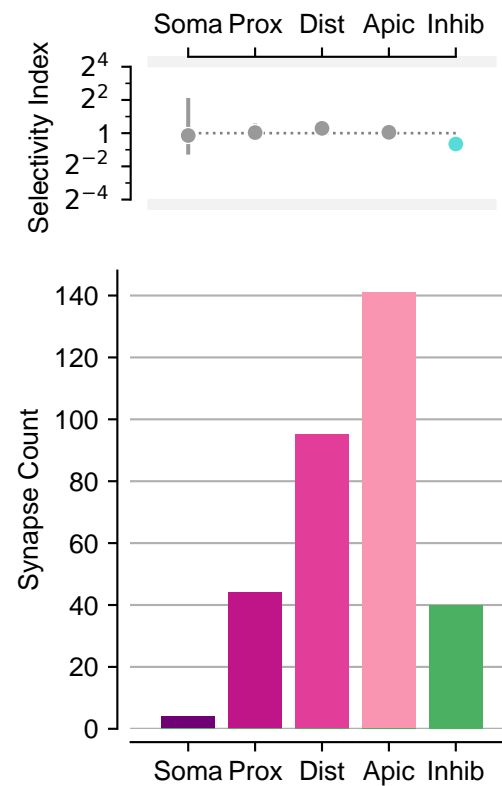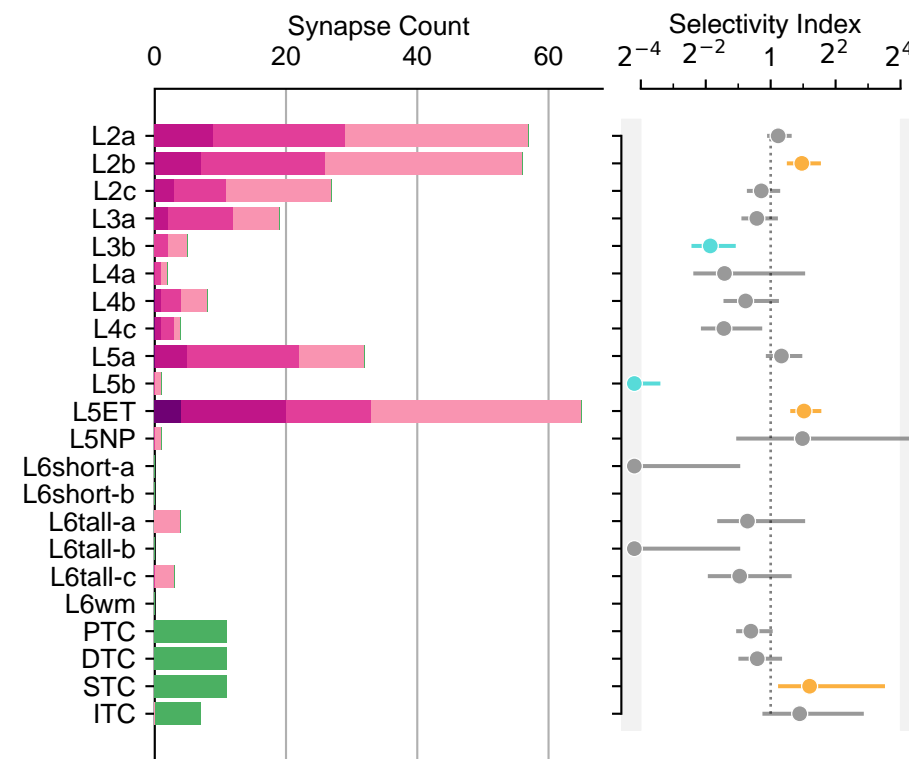

# Motif Group 2

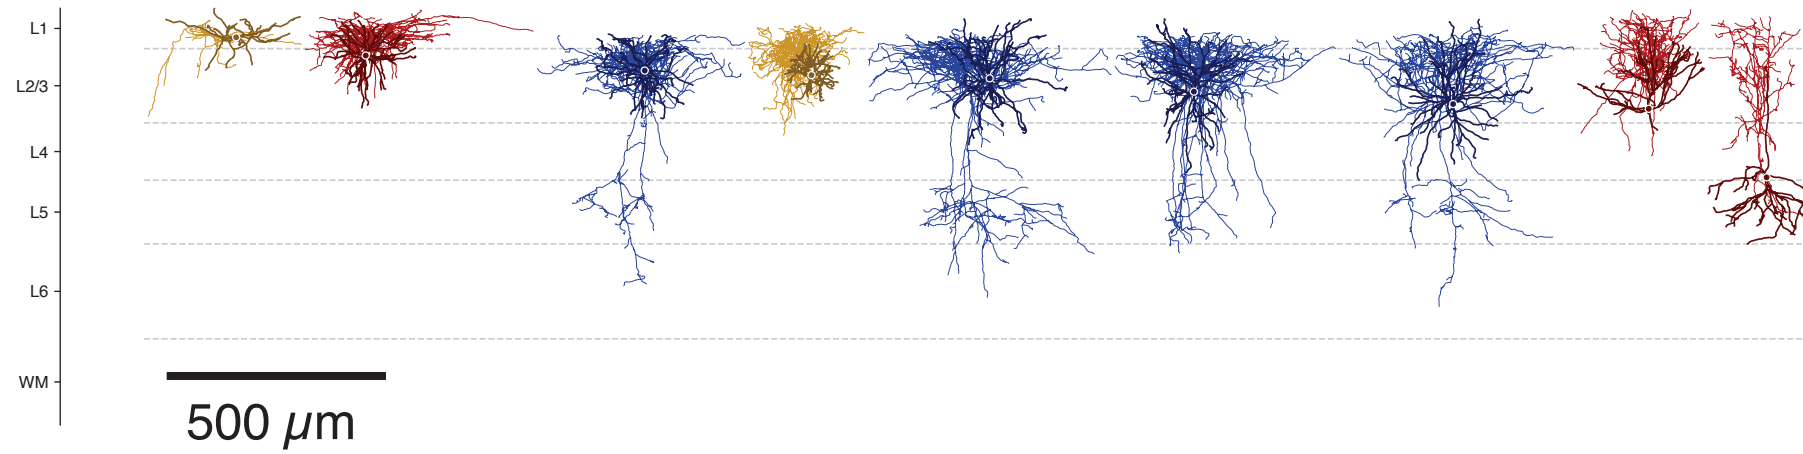

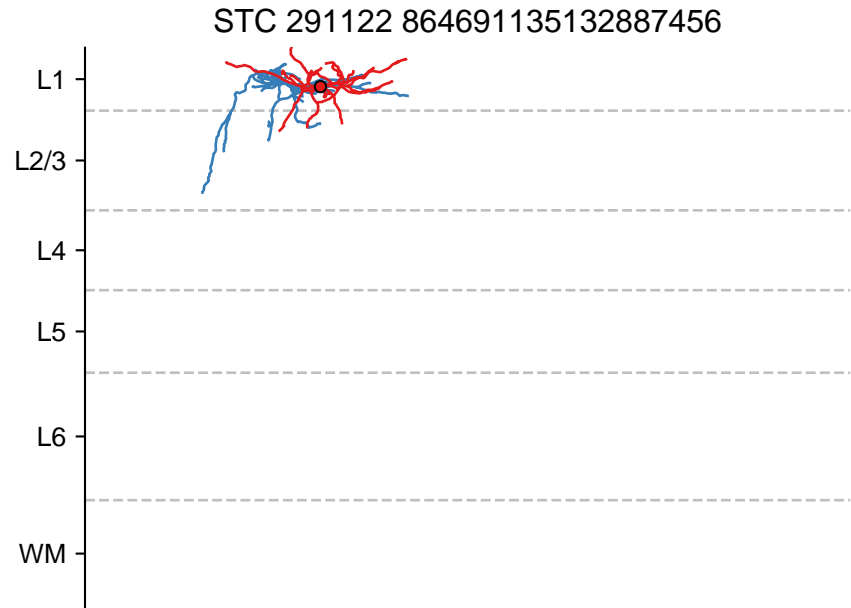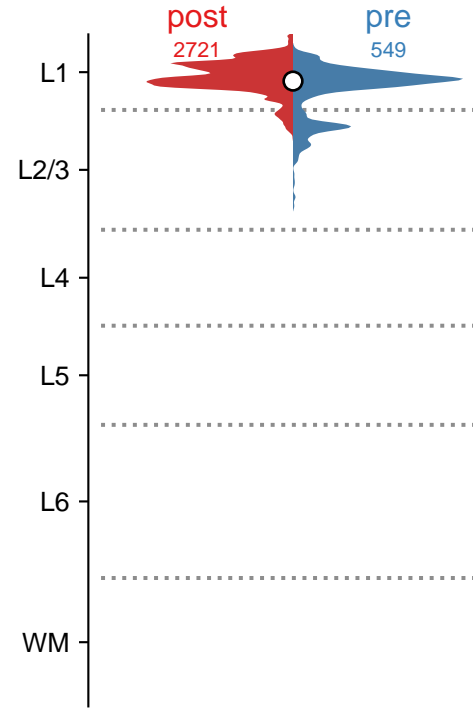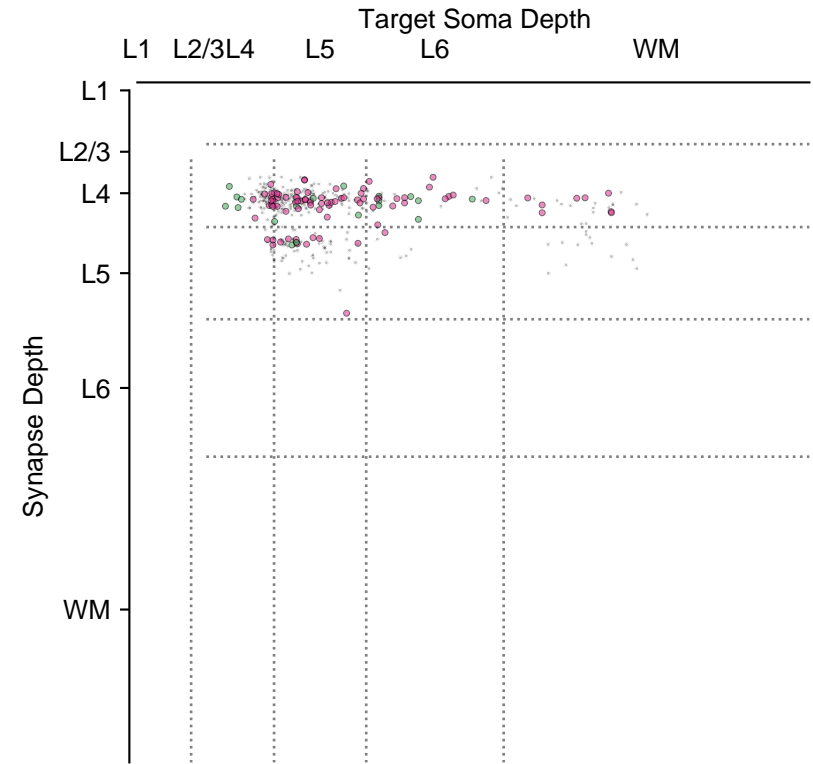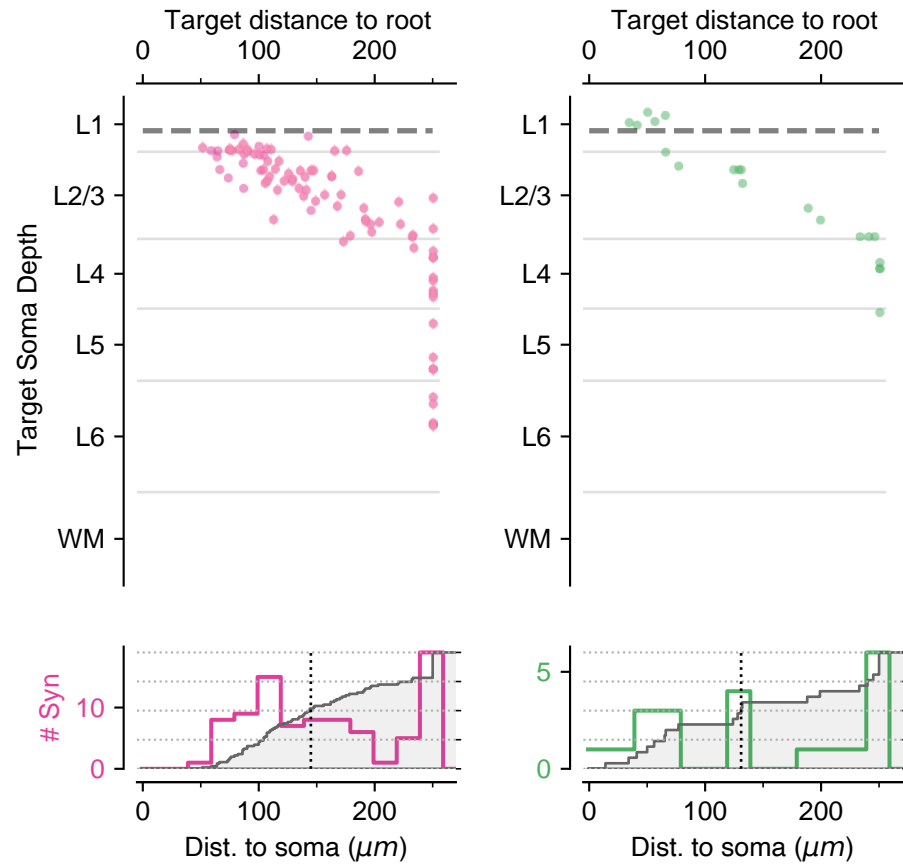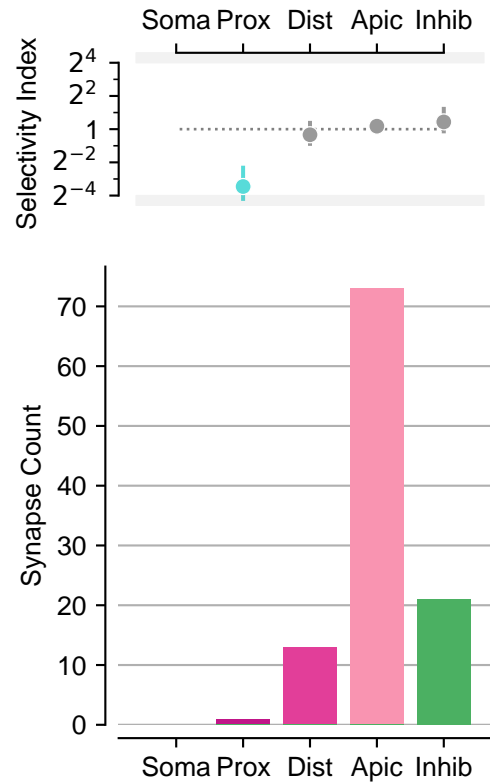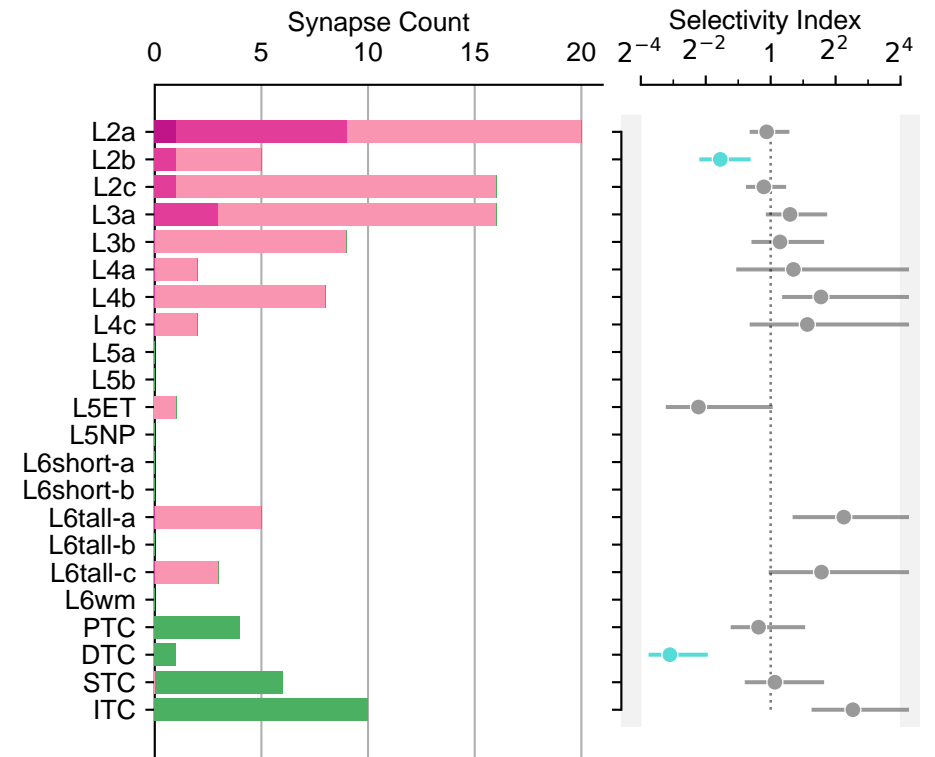

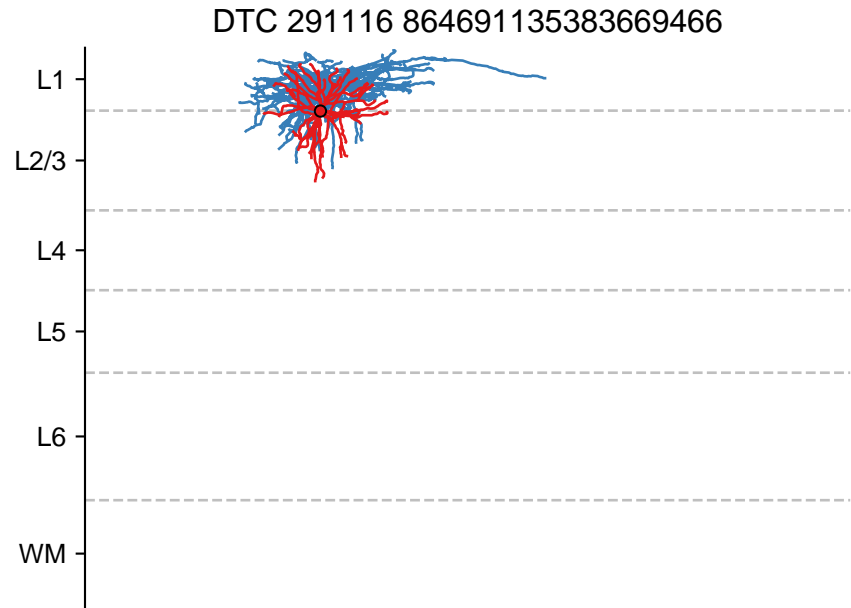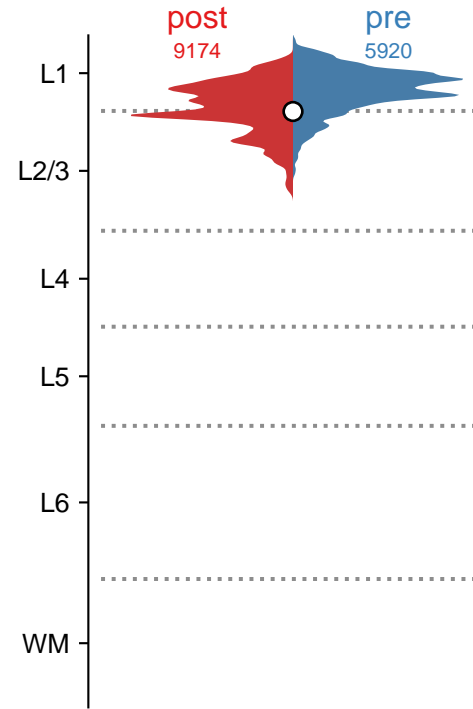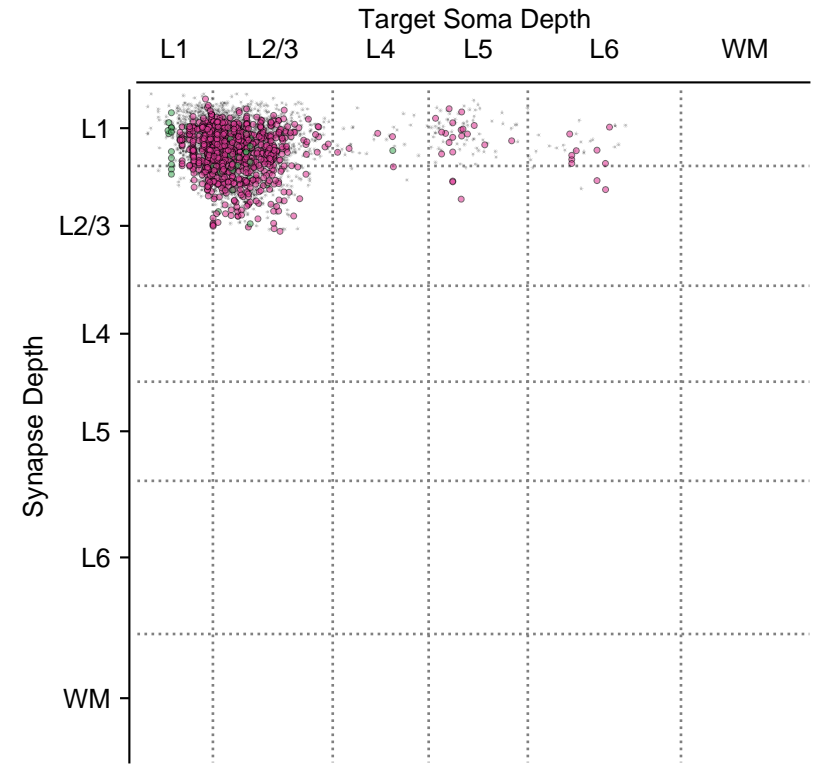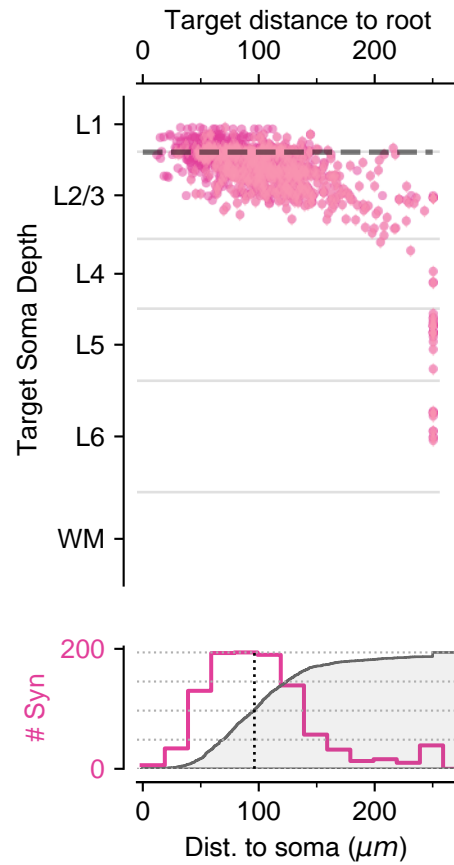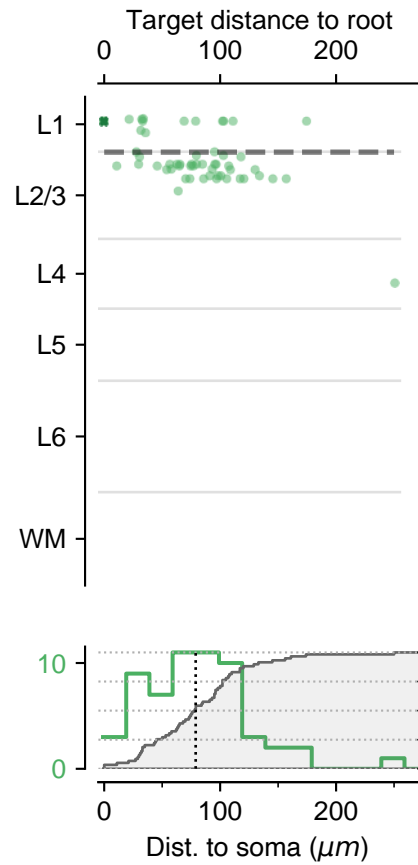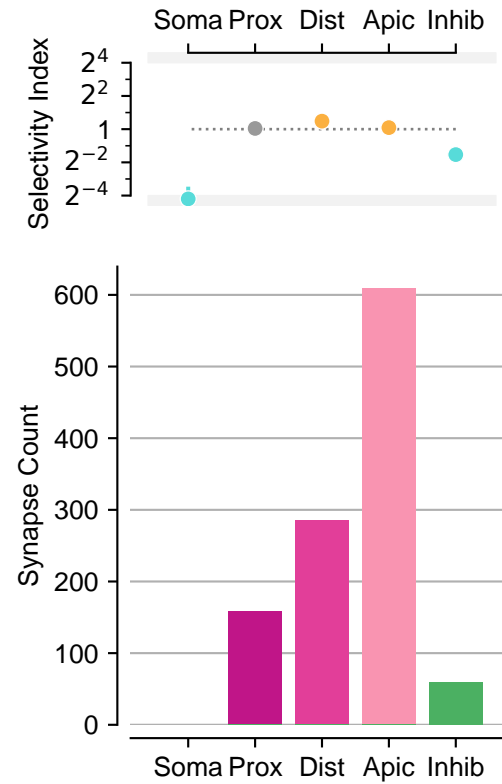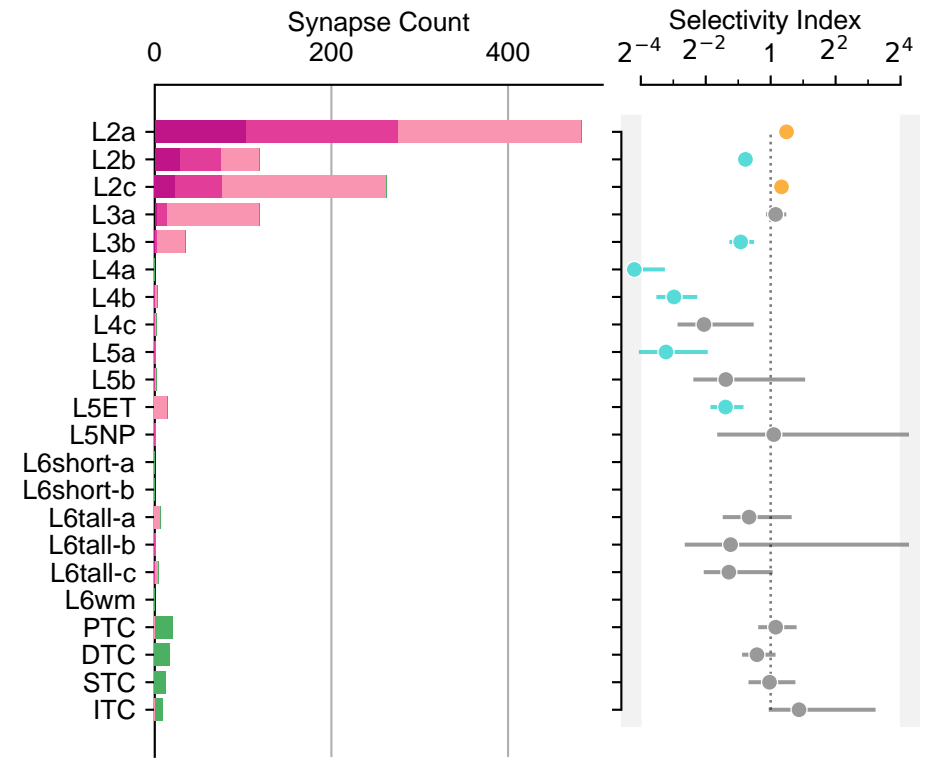

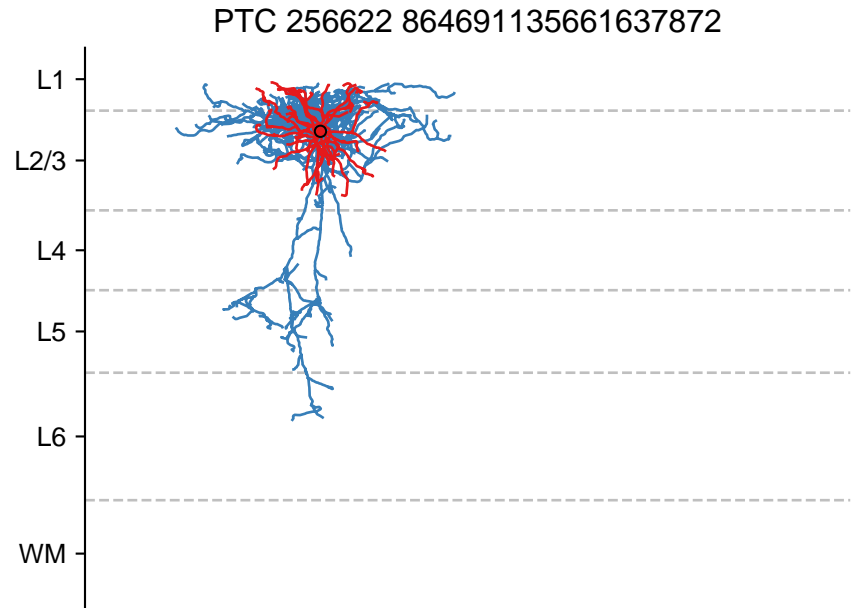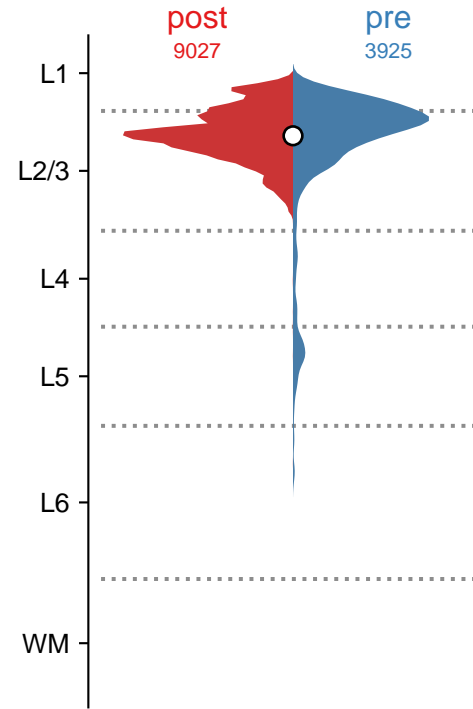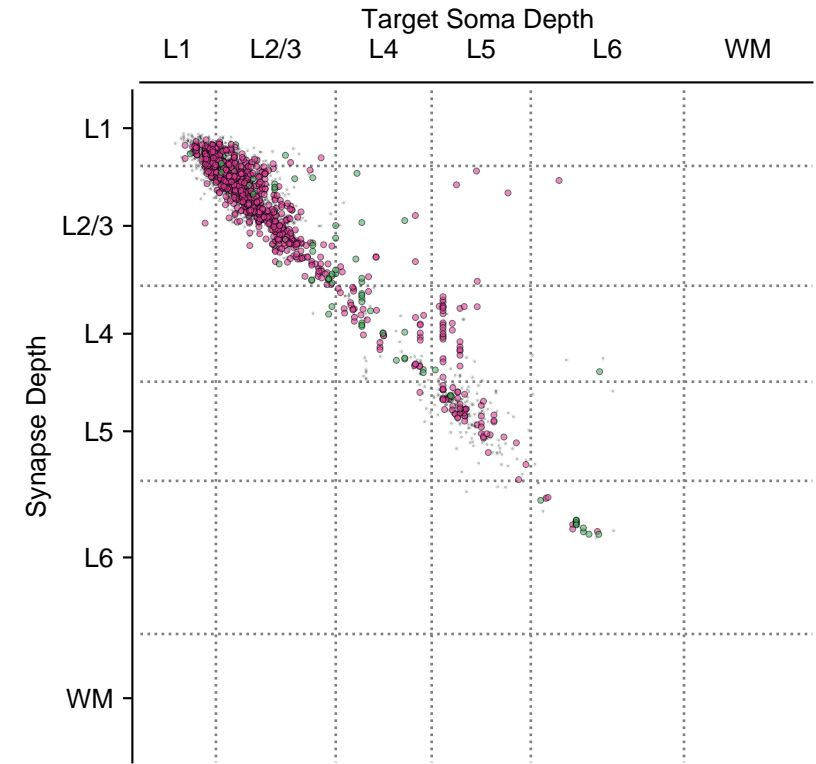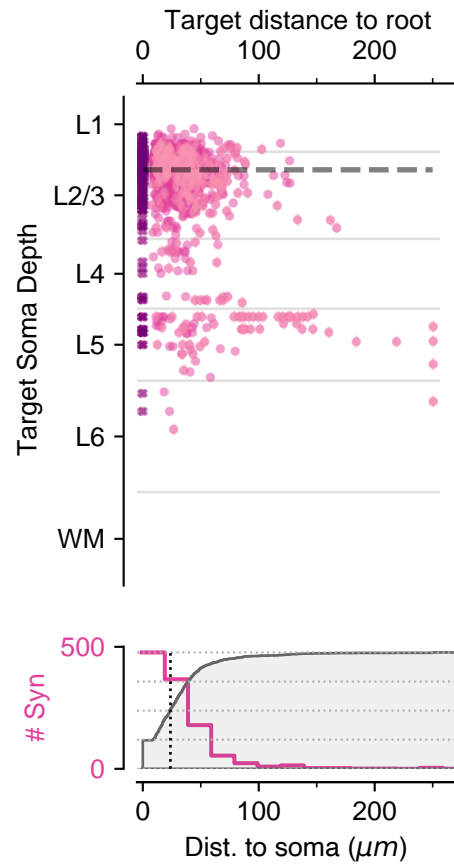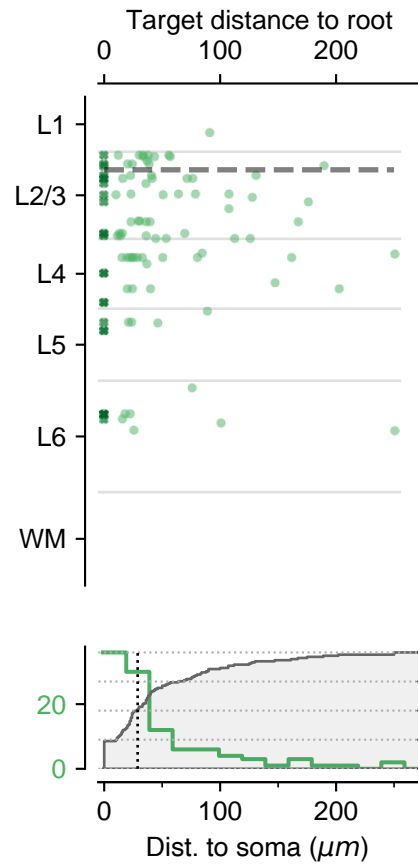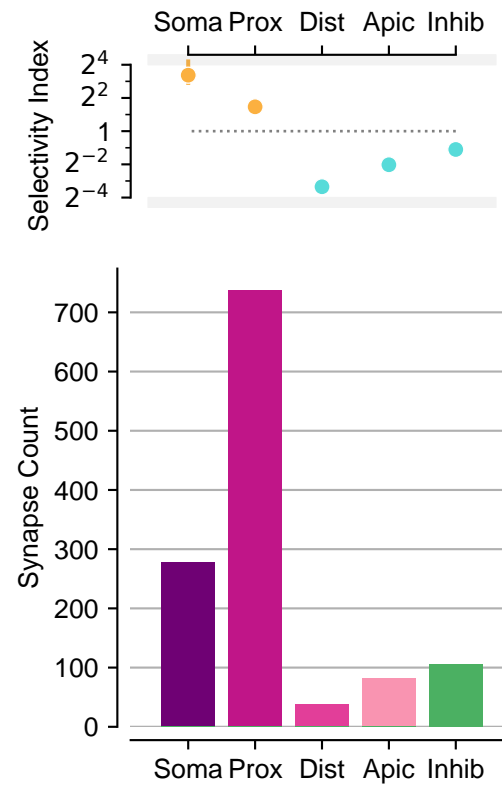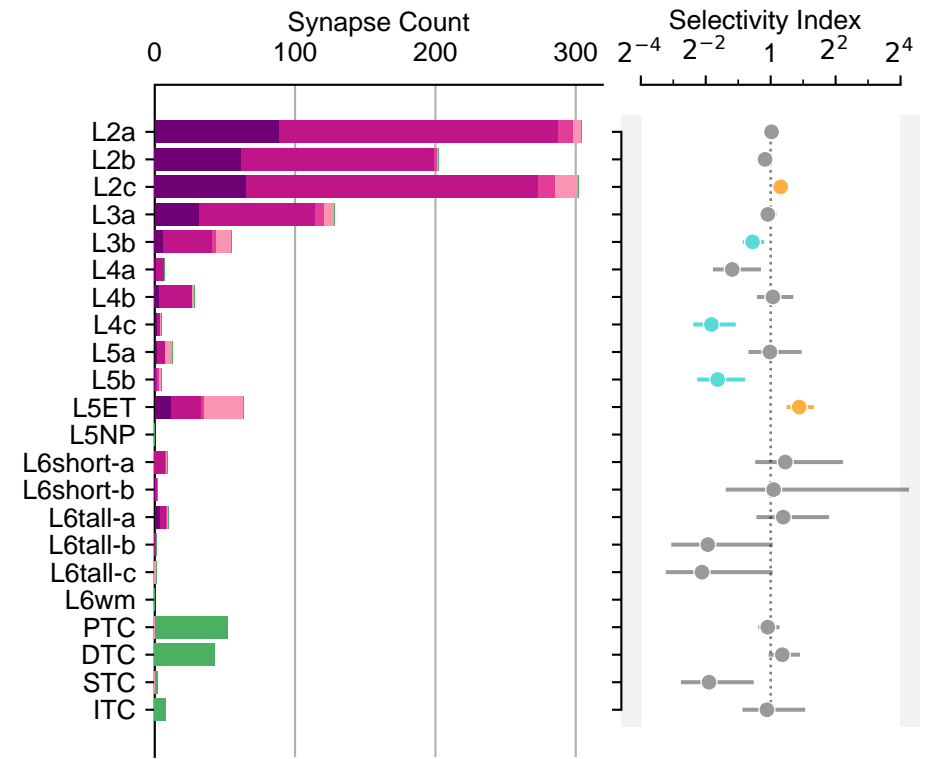



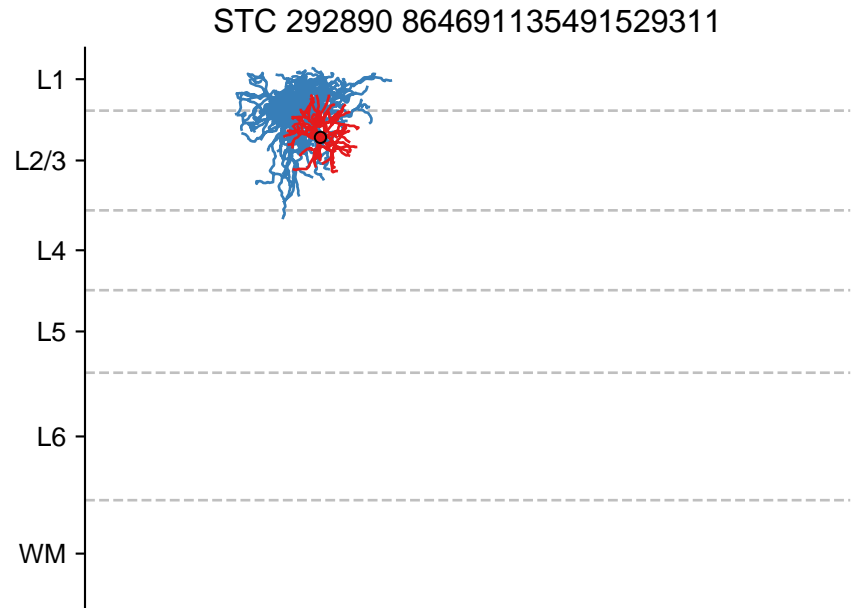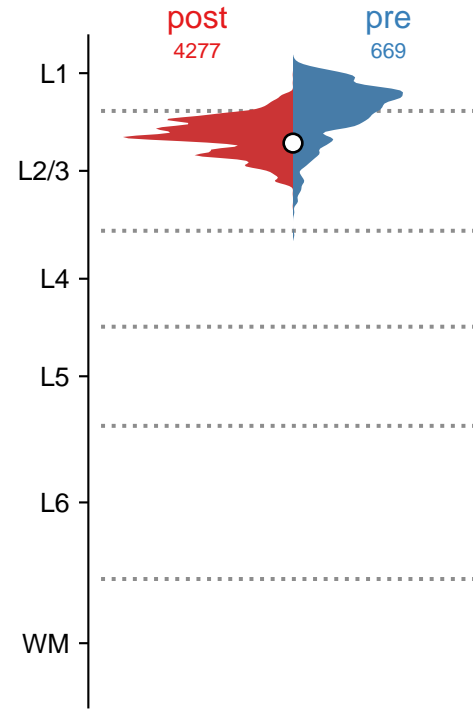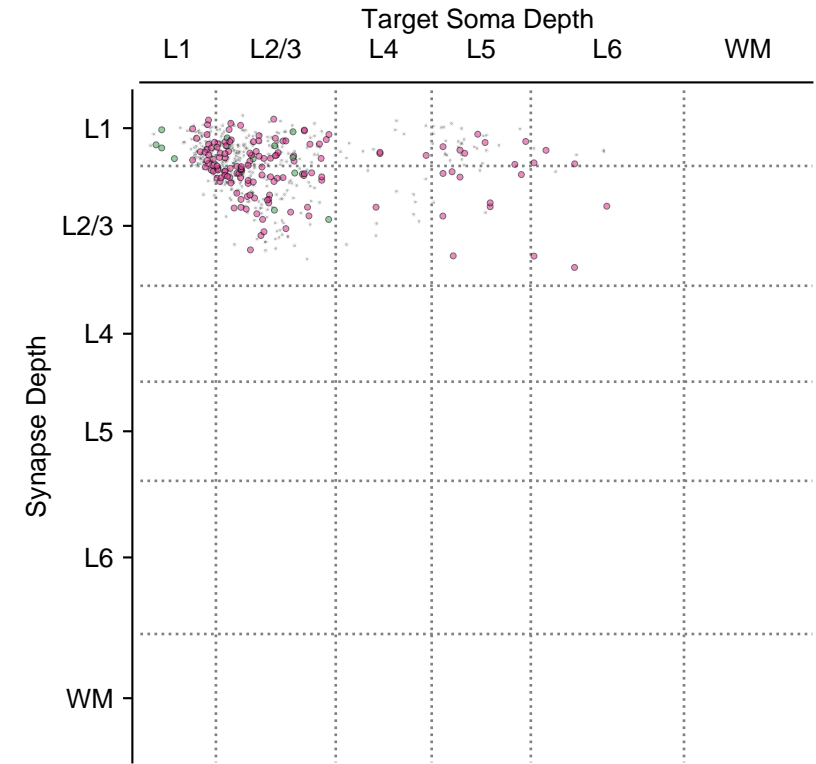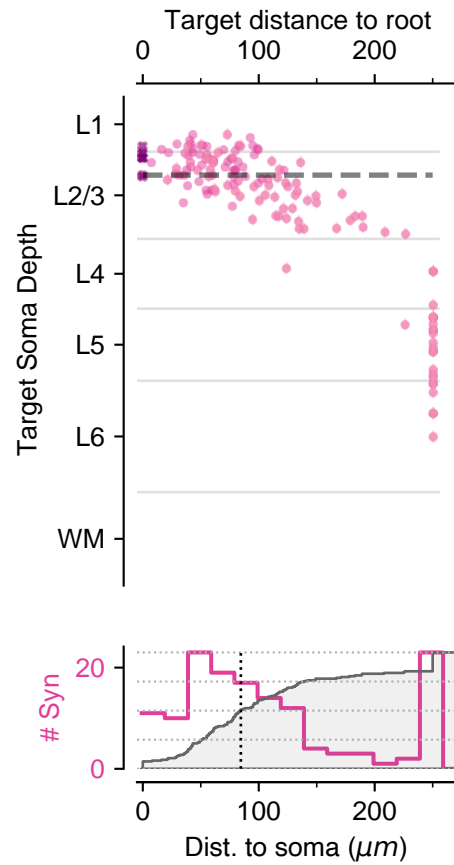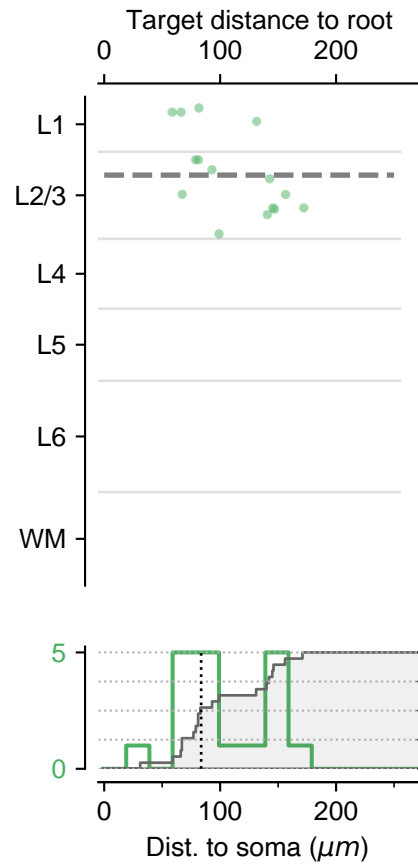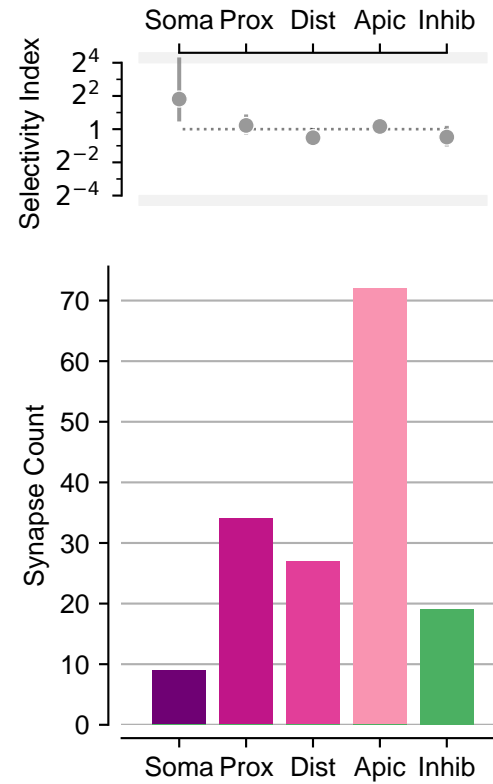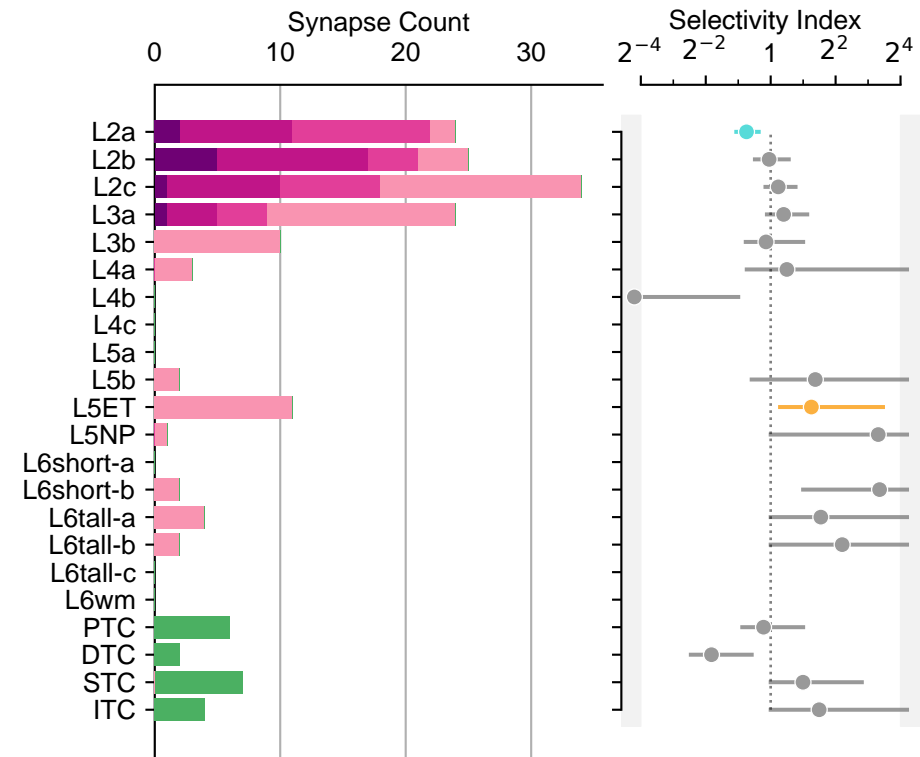

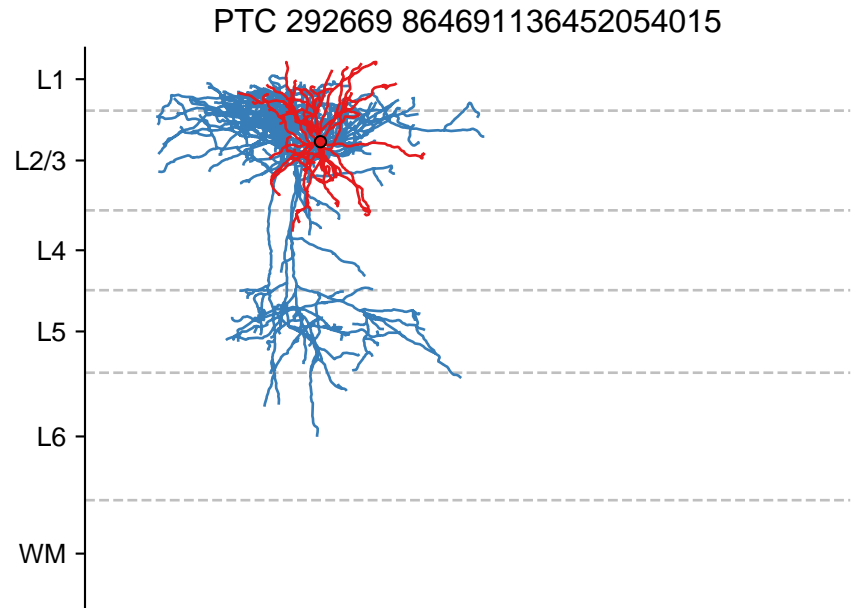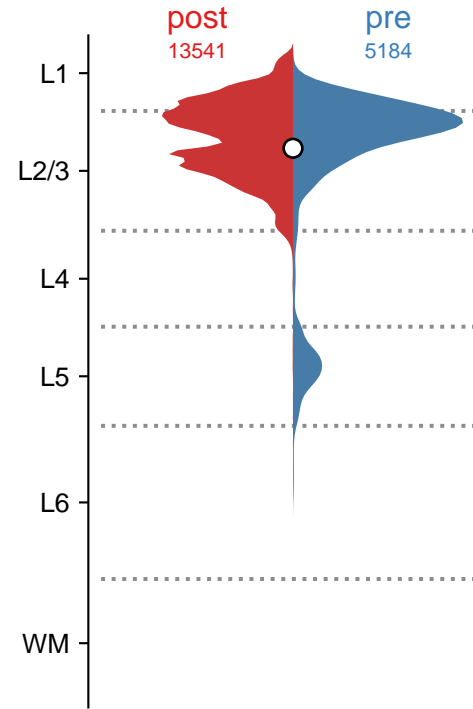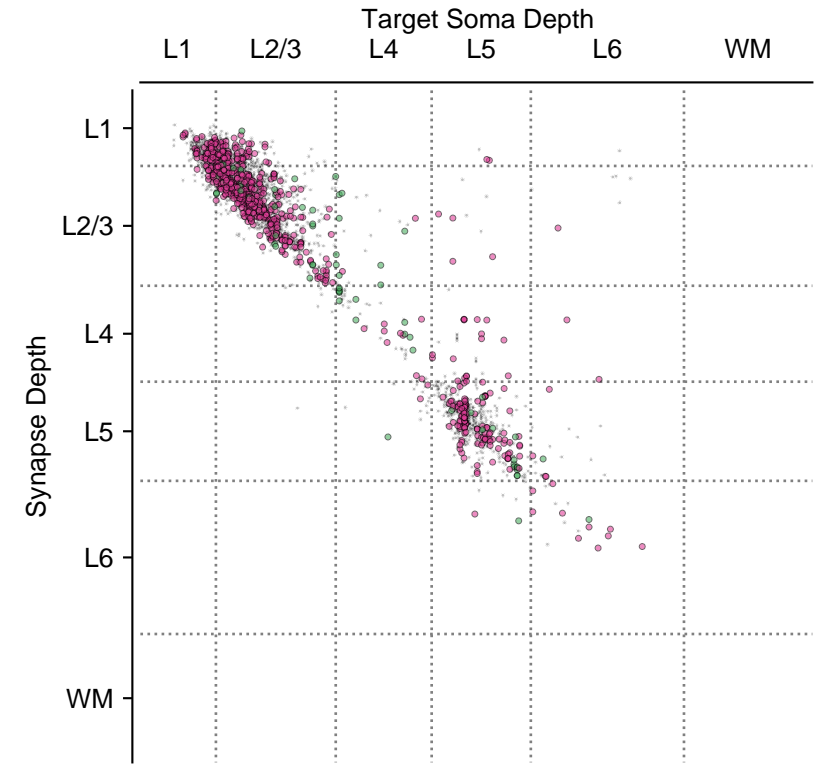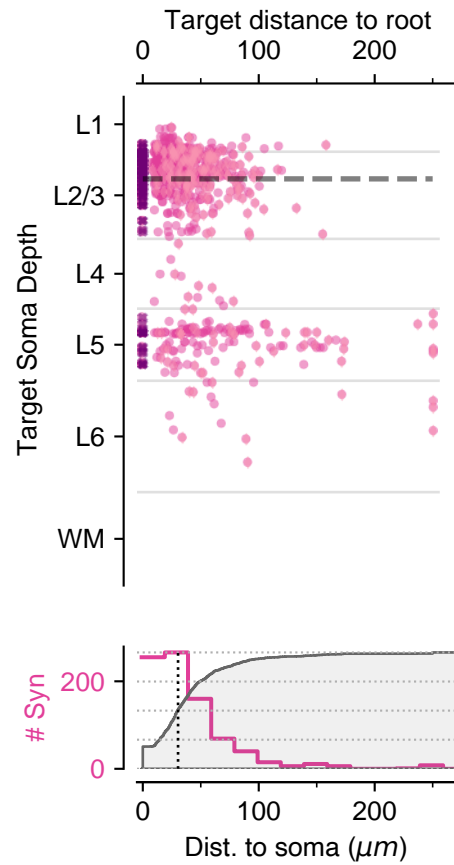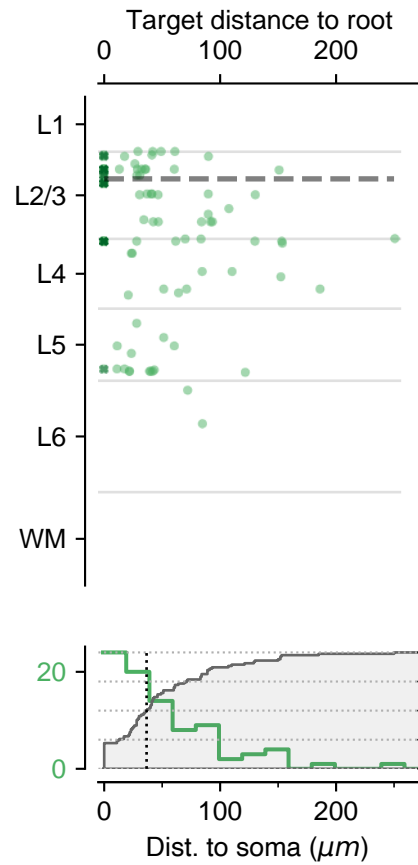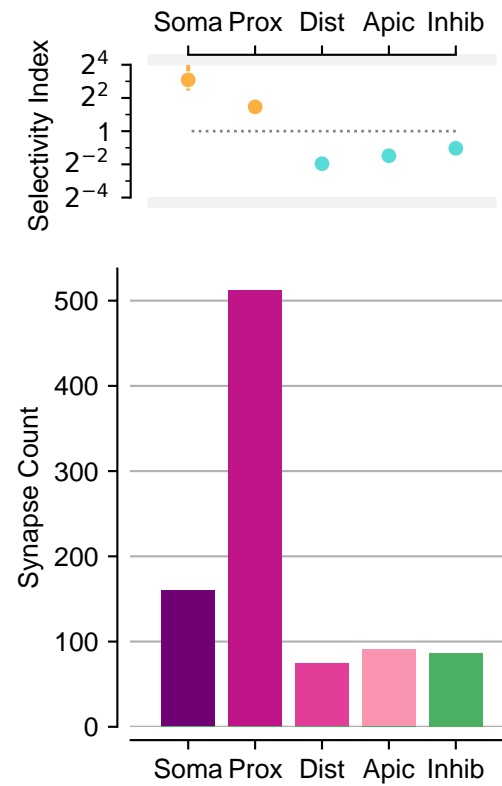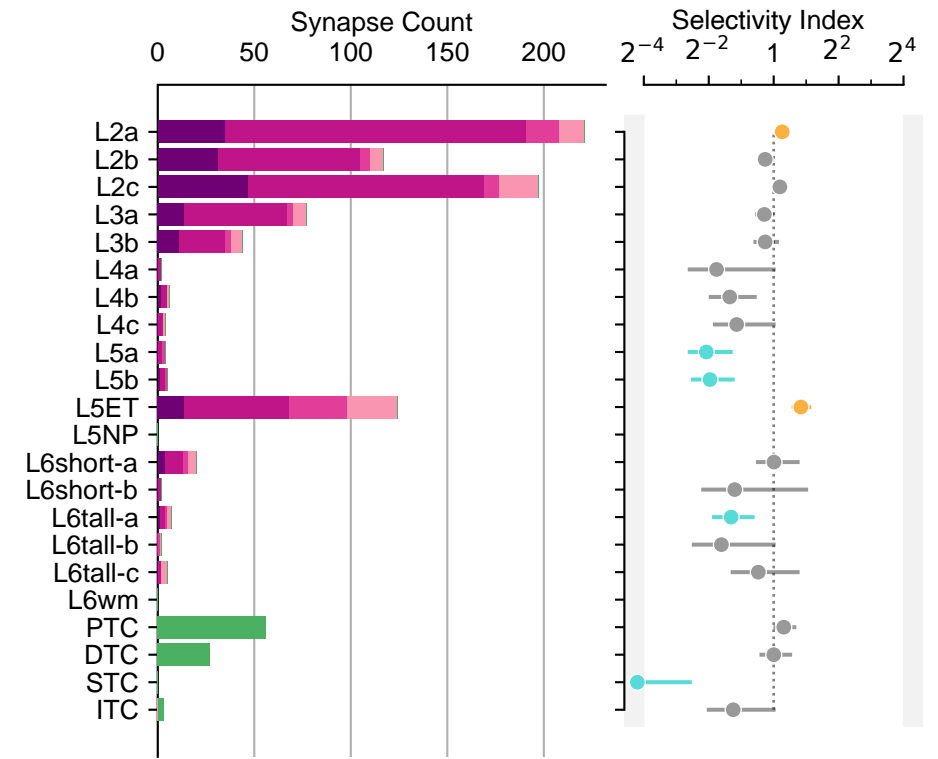

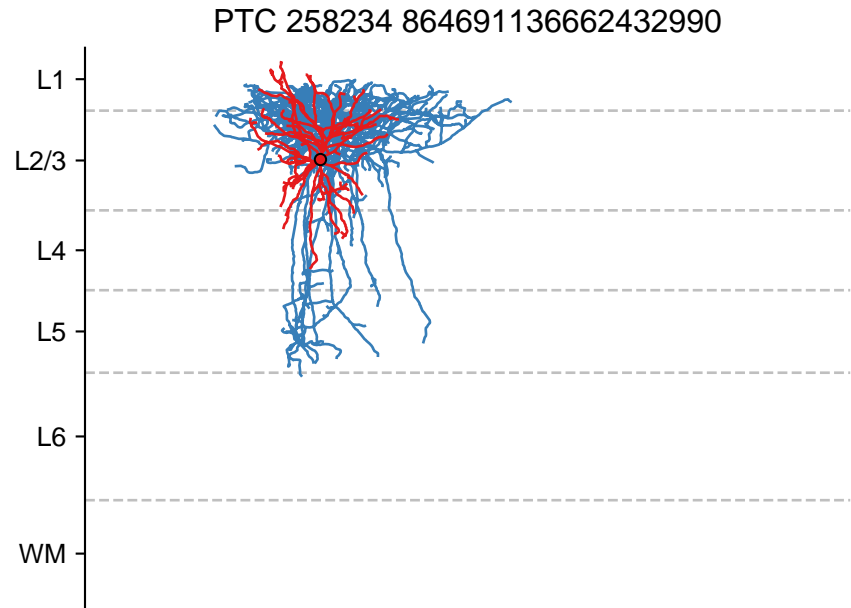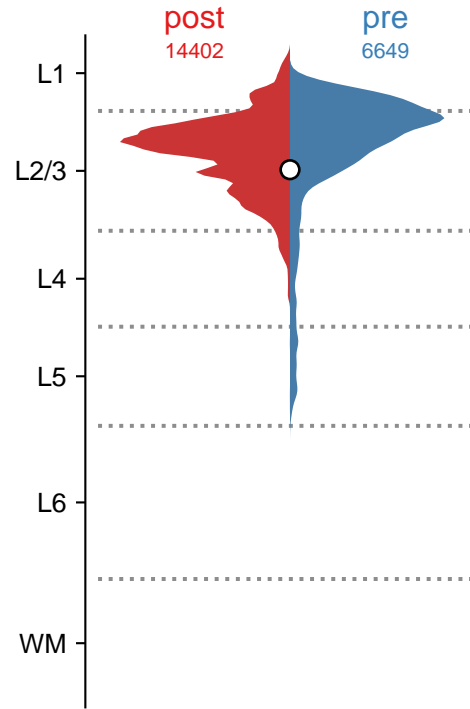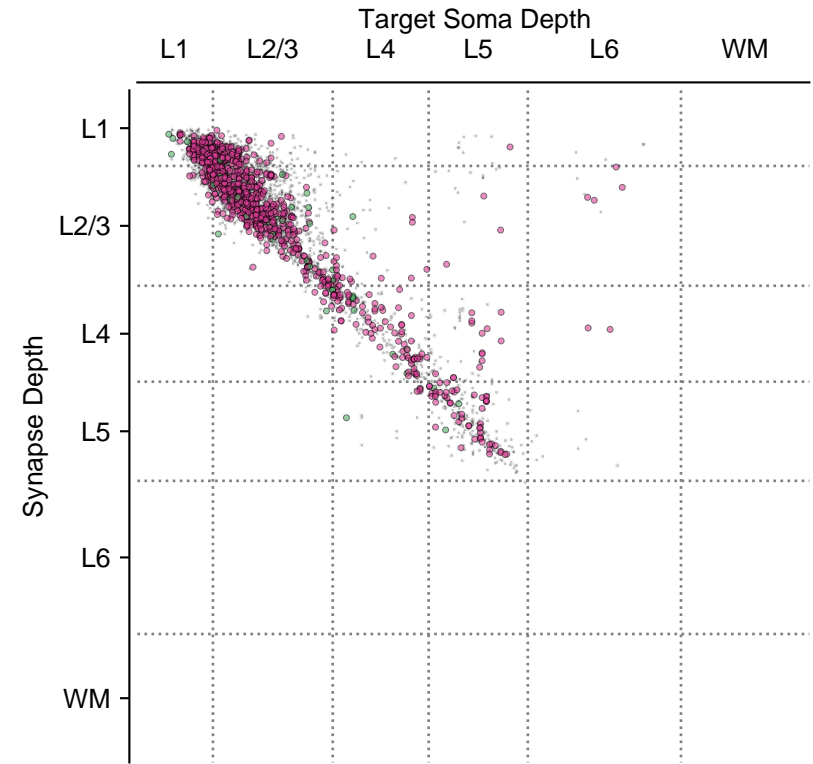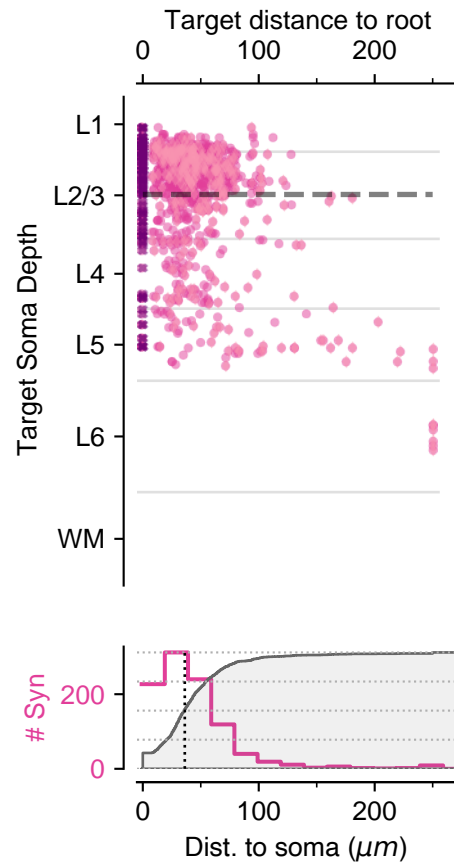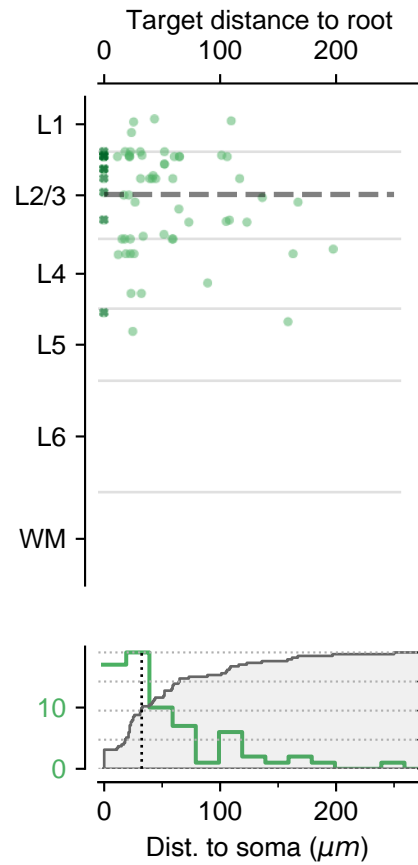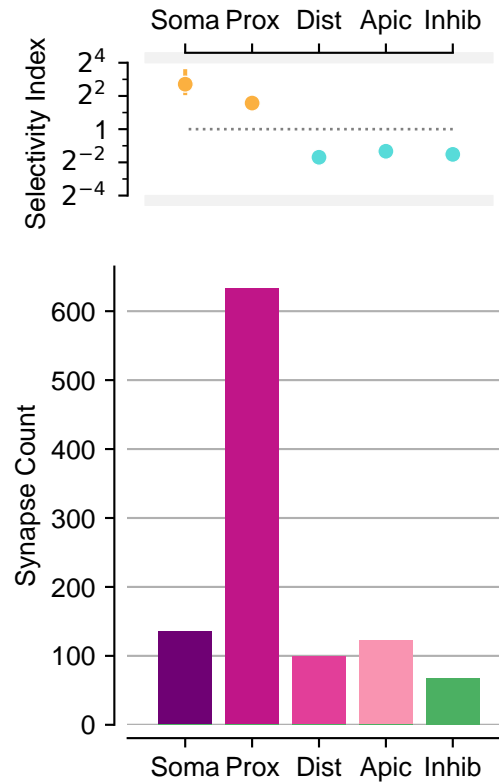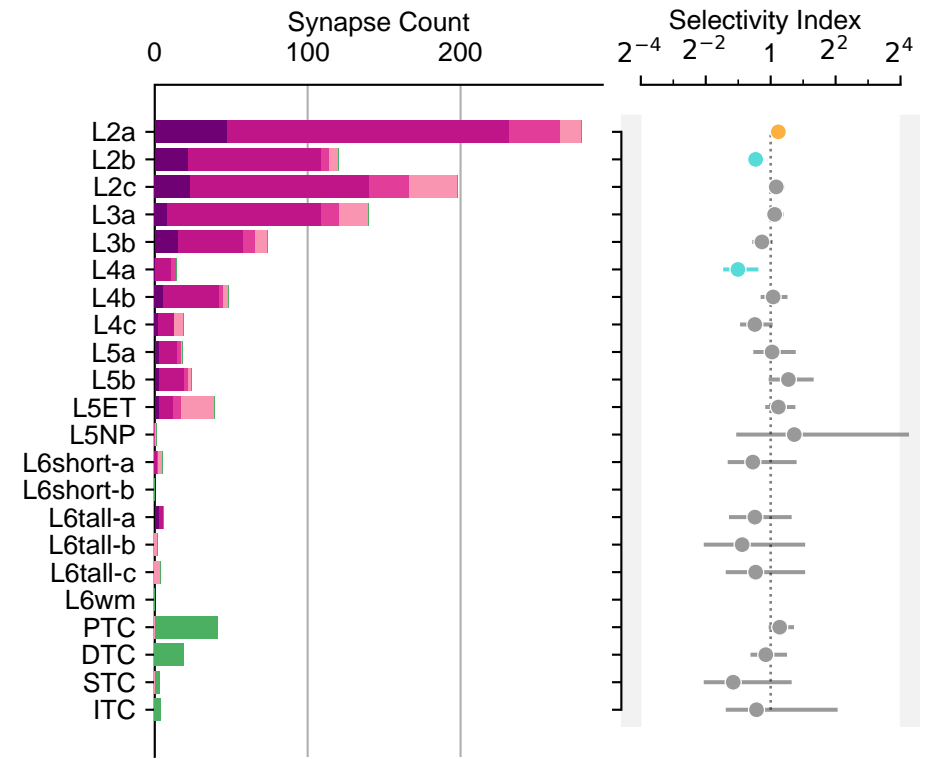

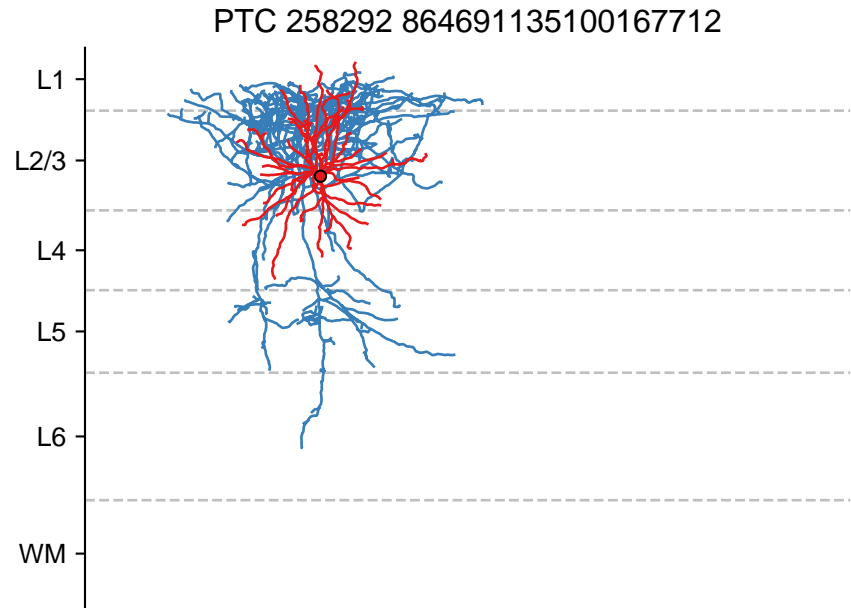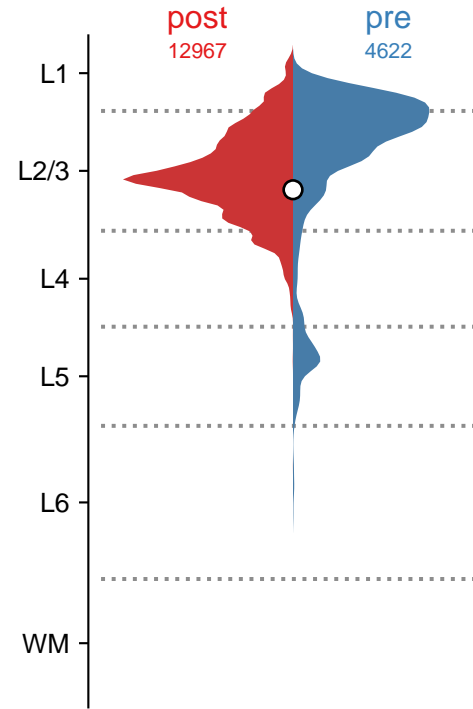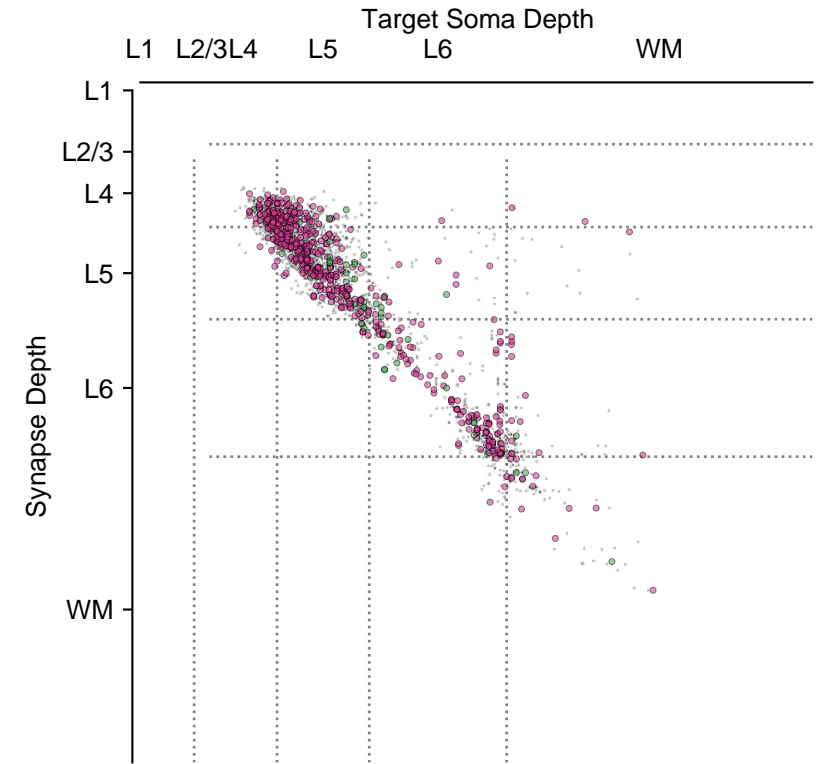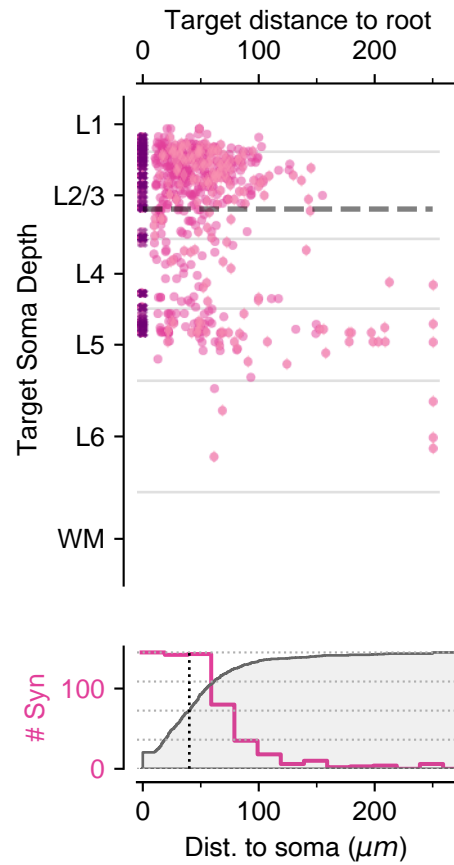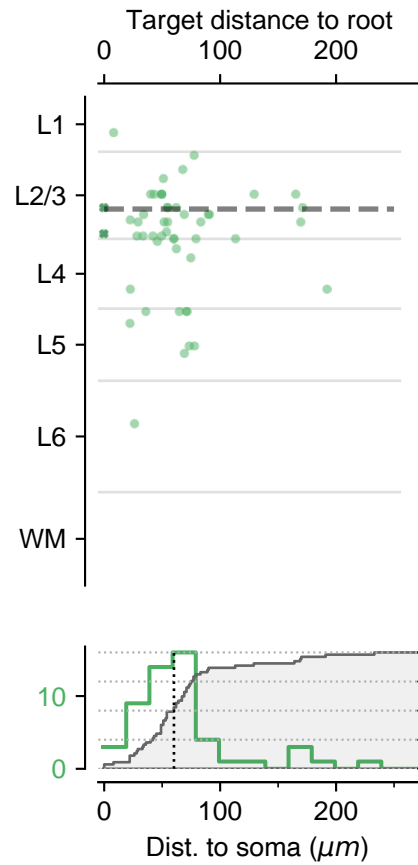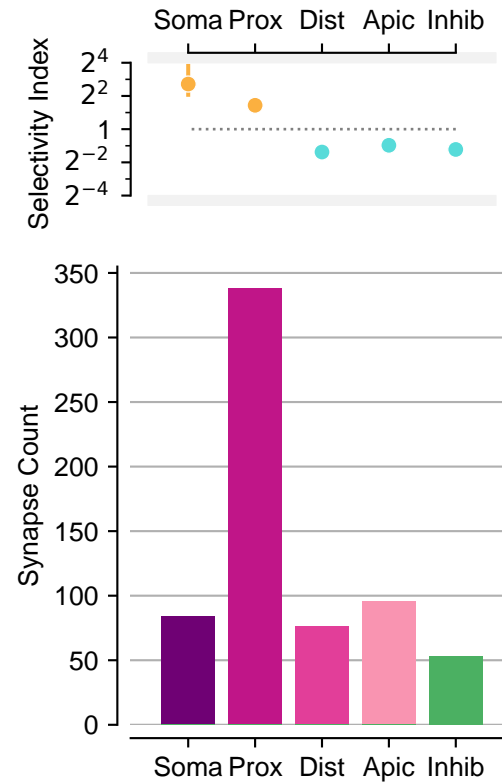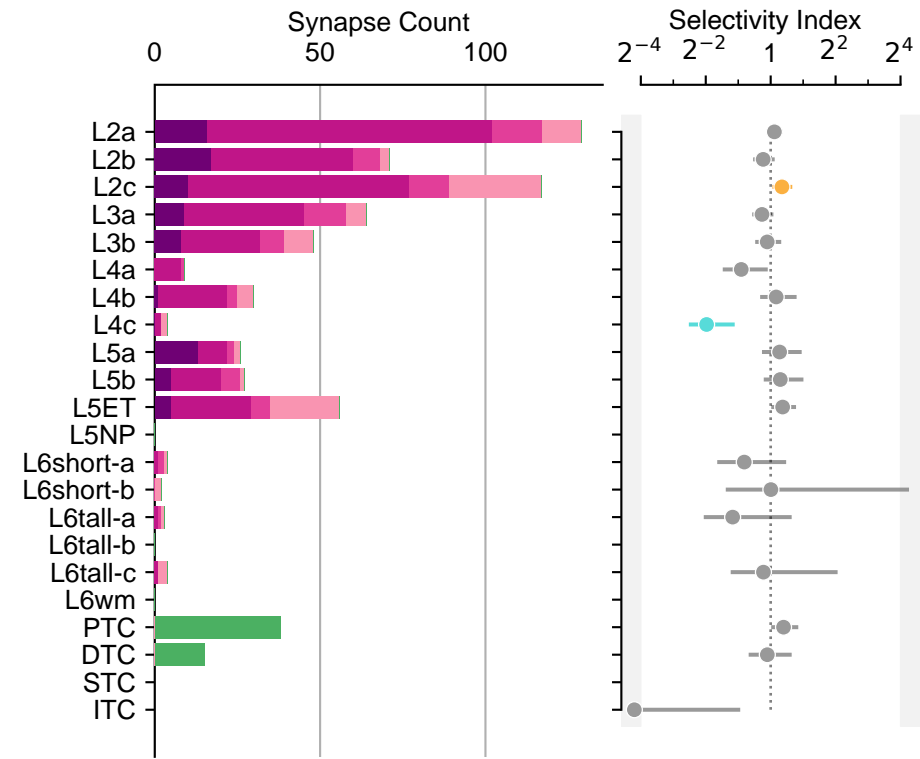

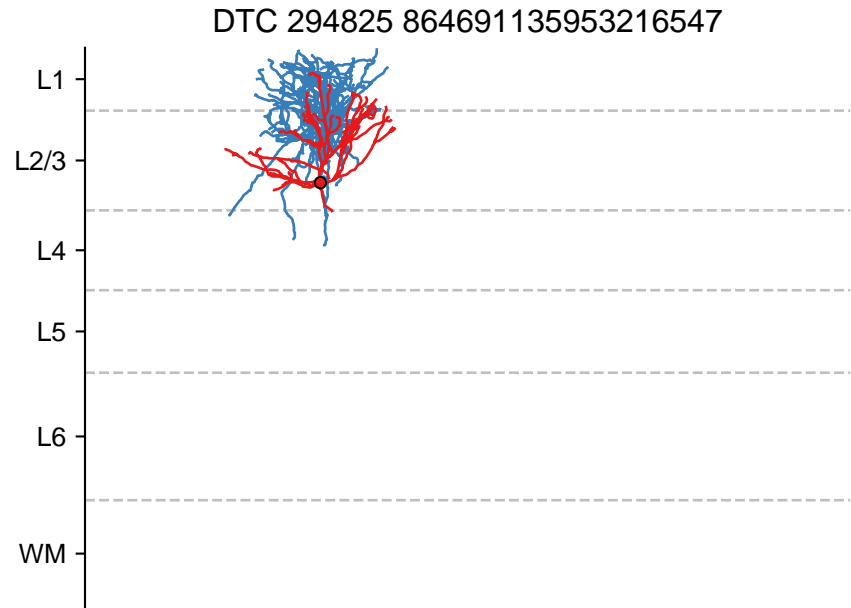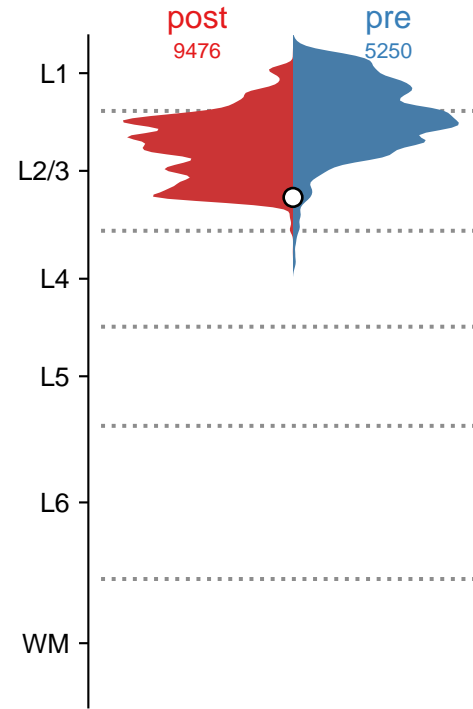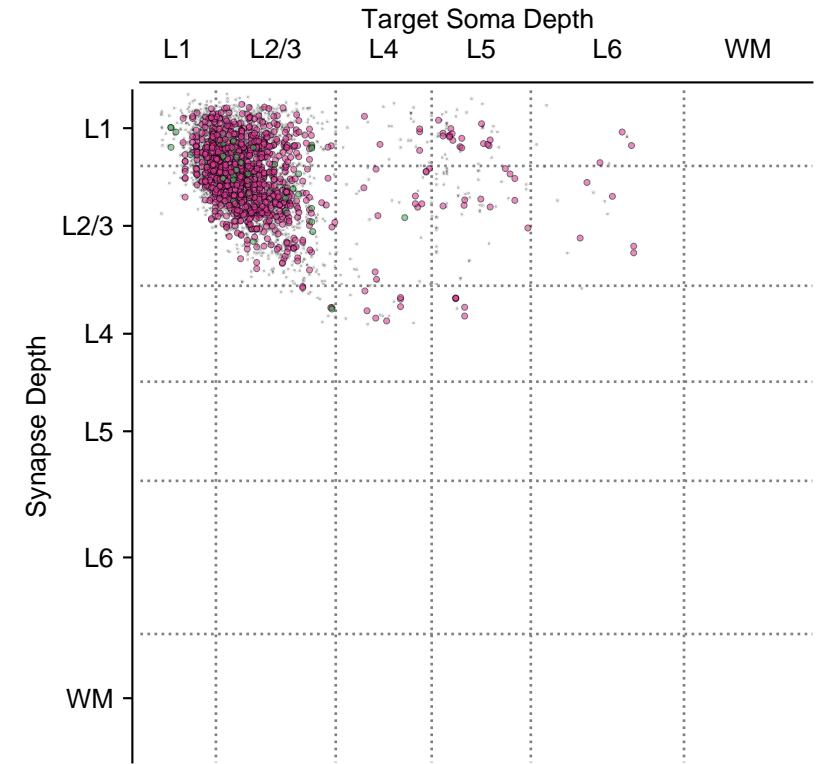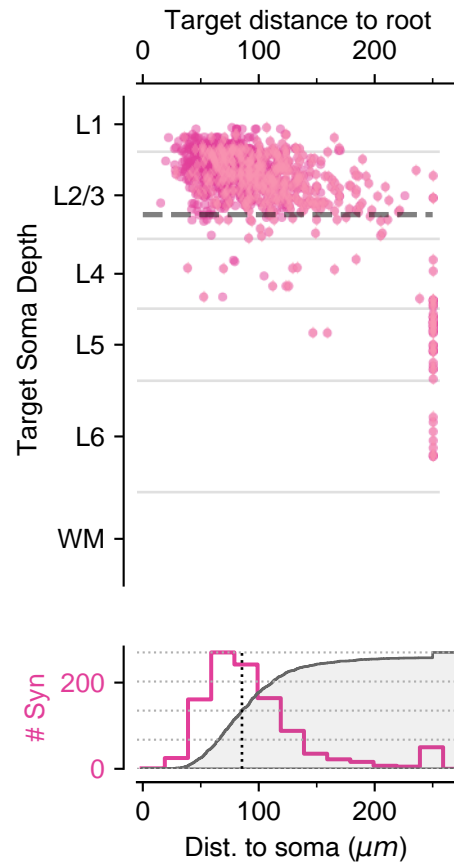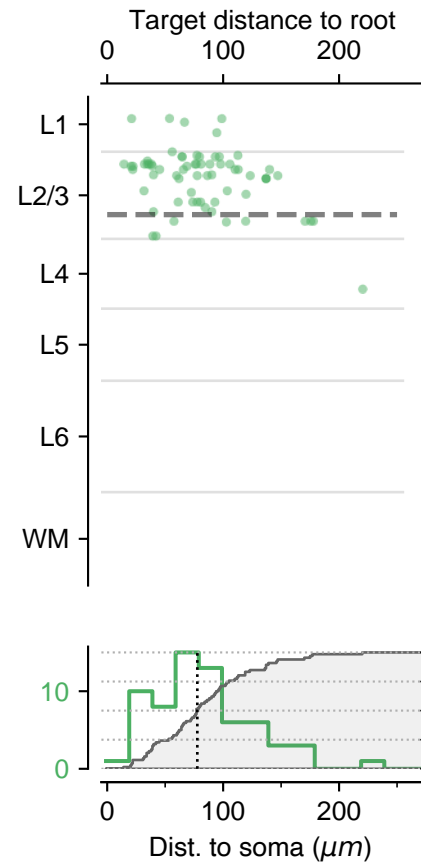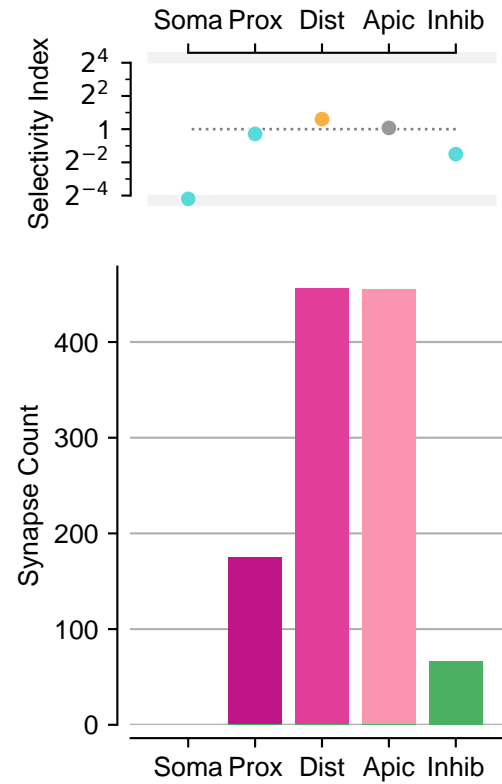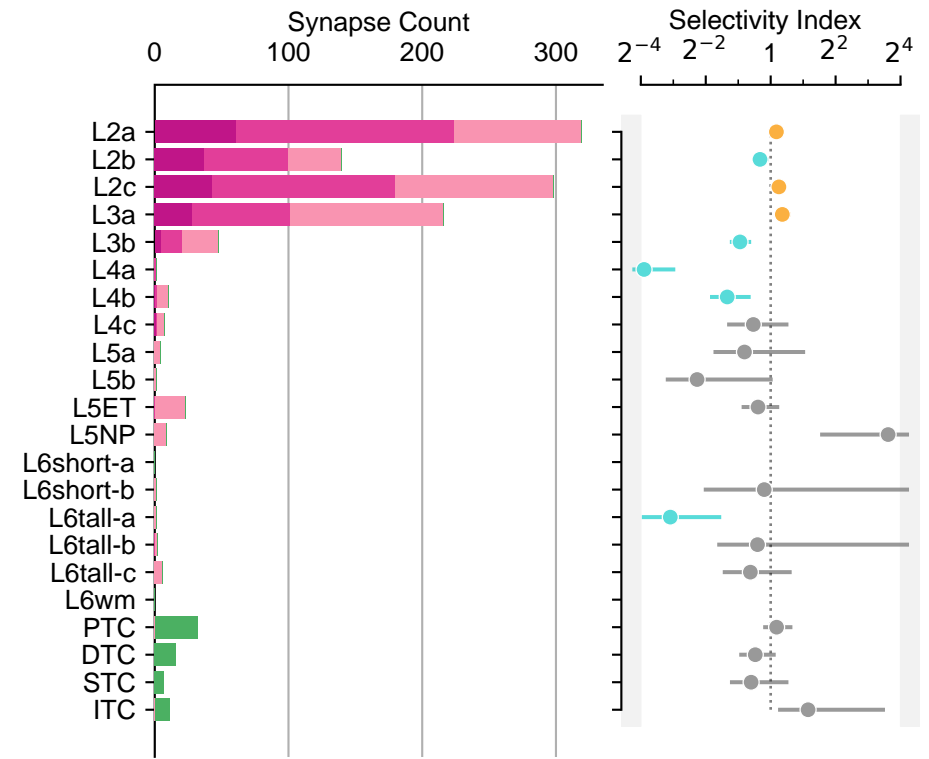

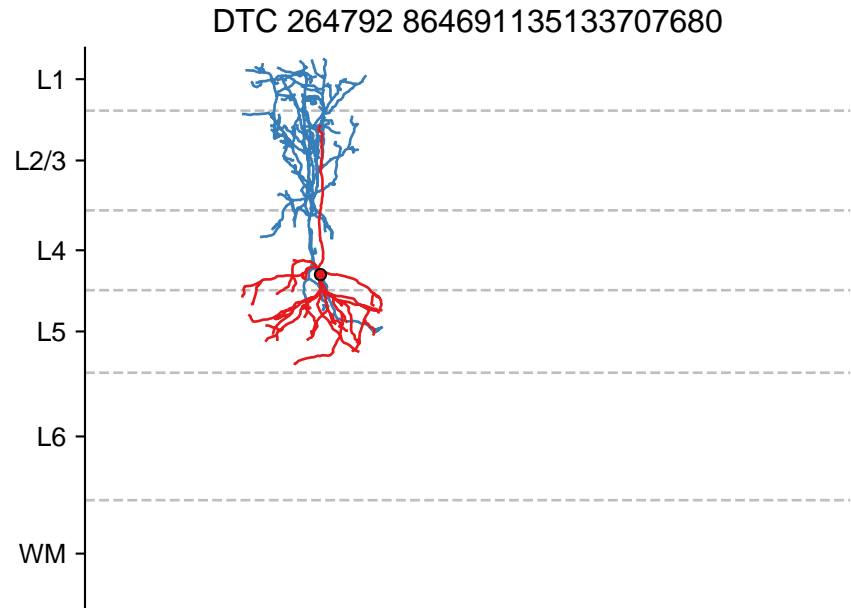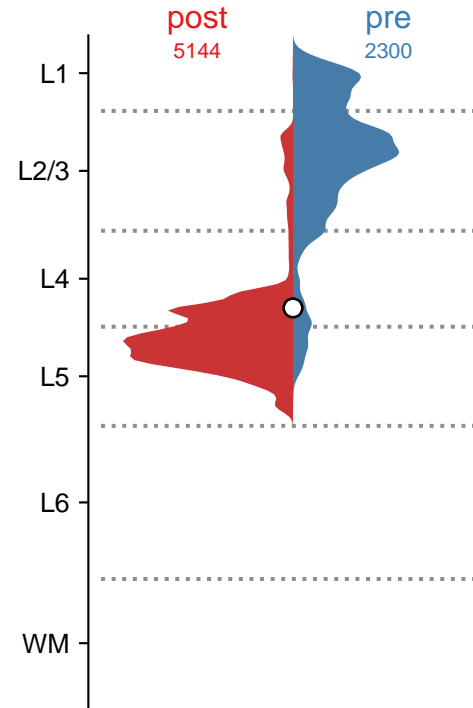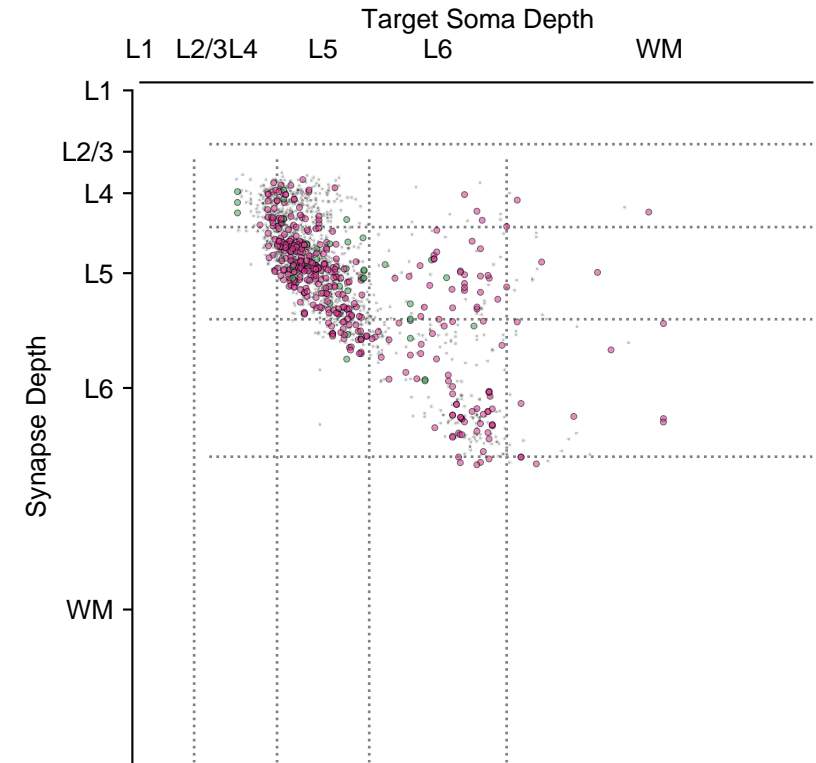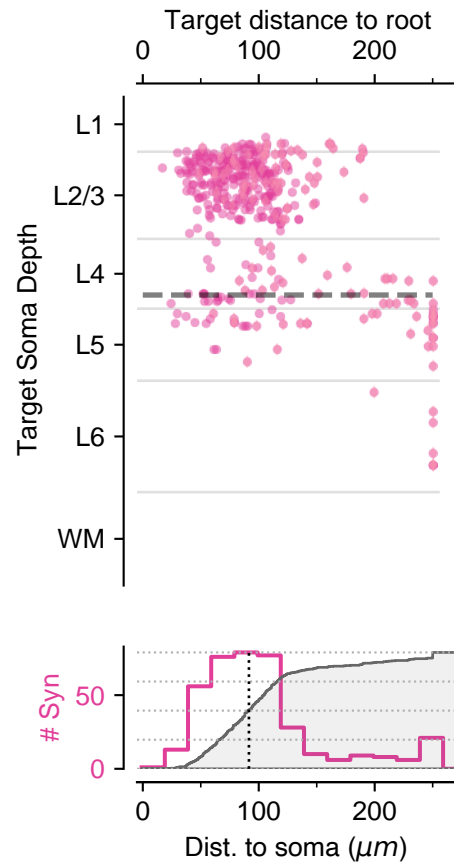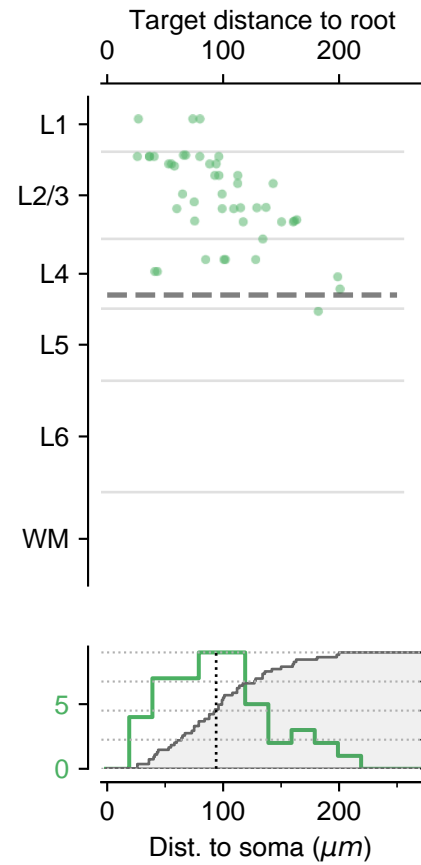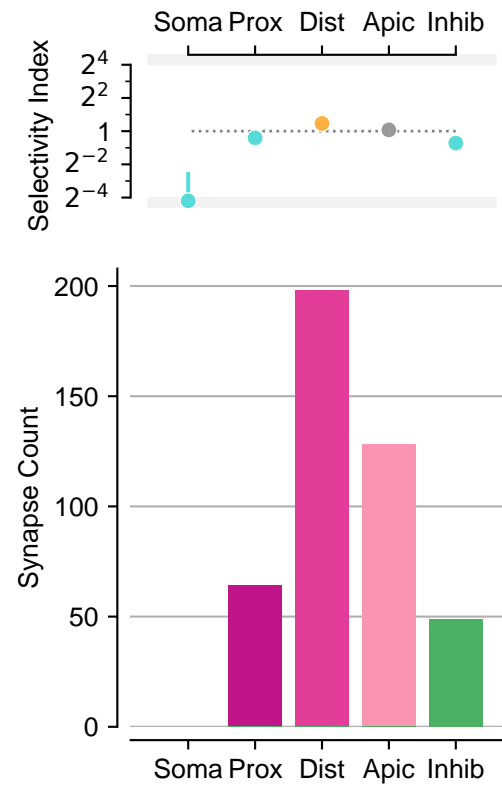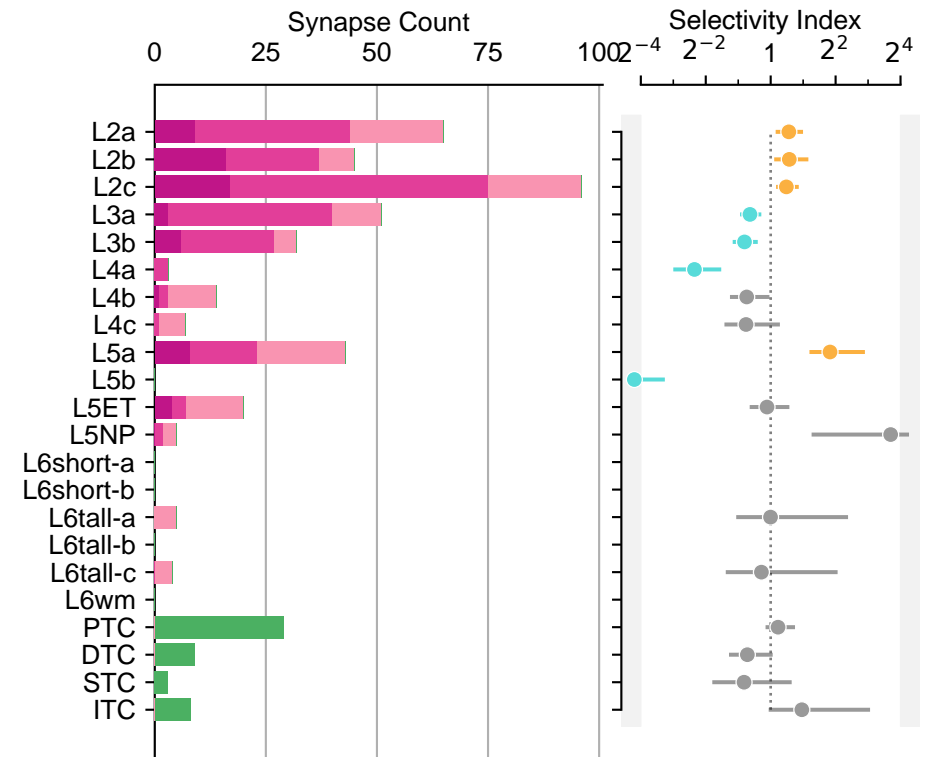

# Motif Group 3

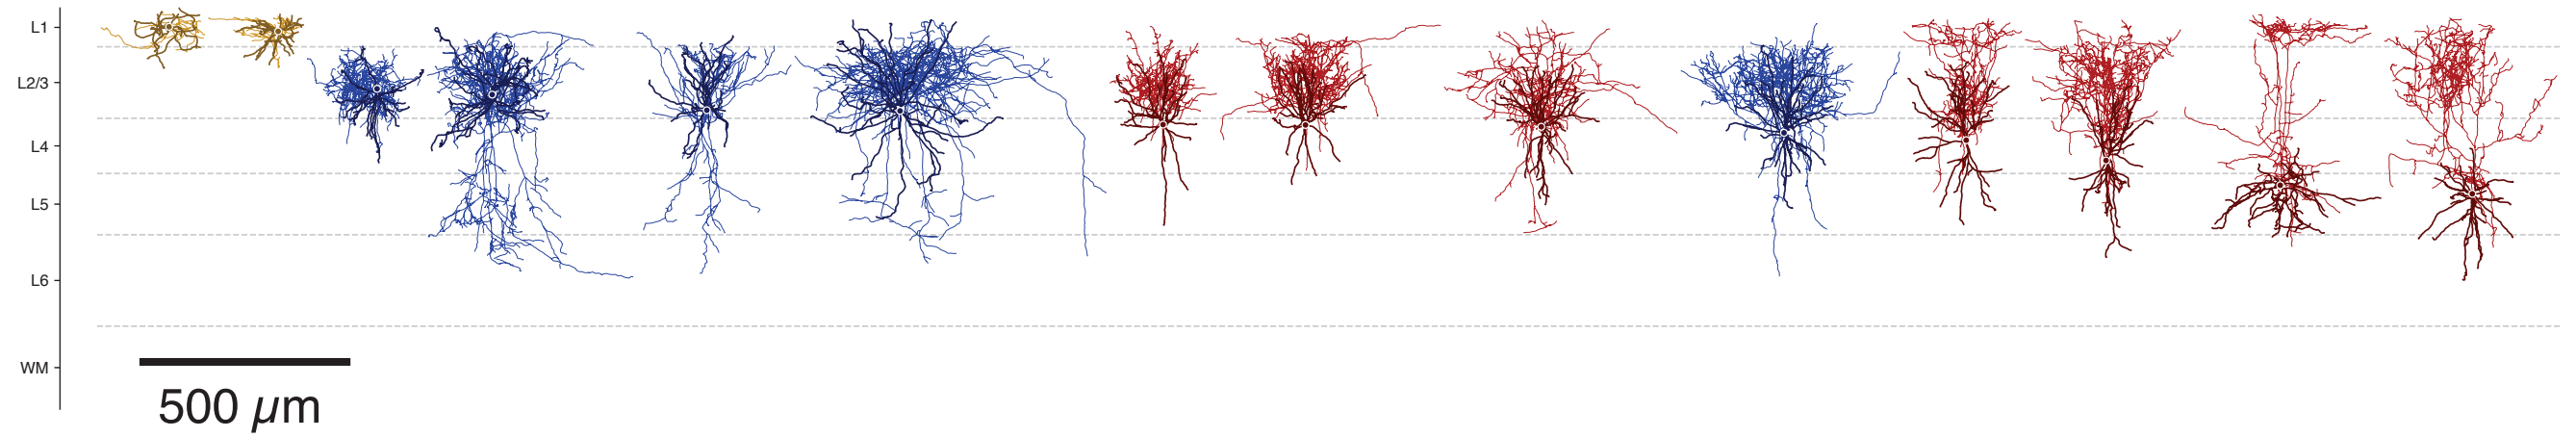

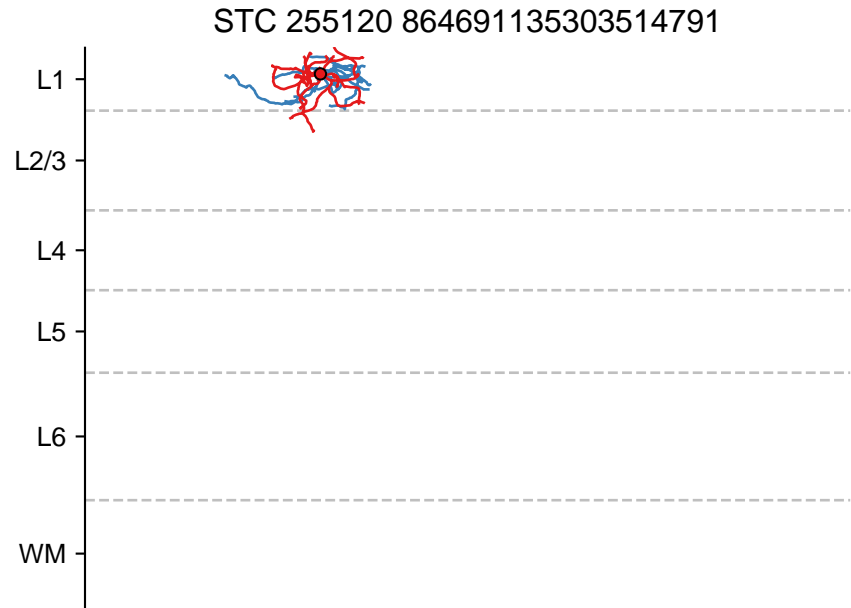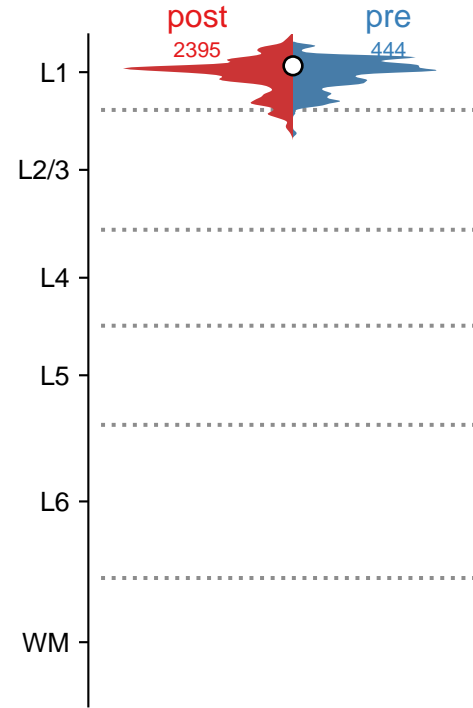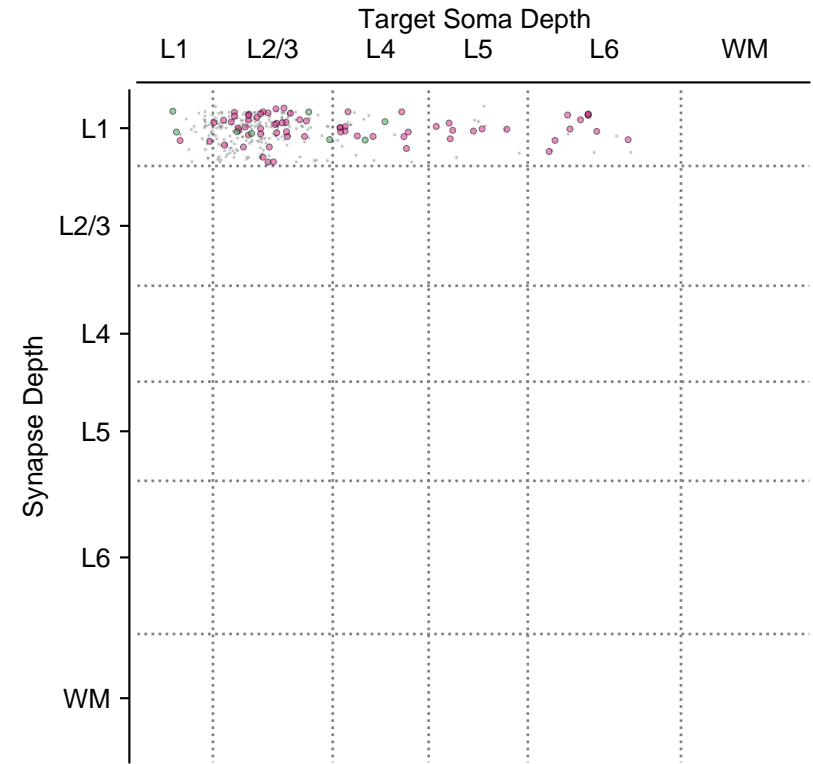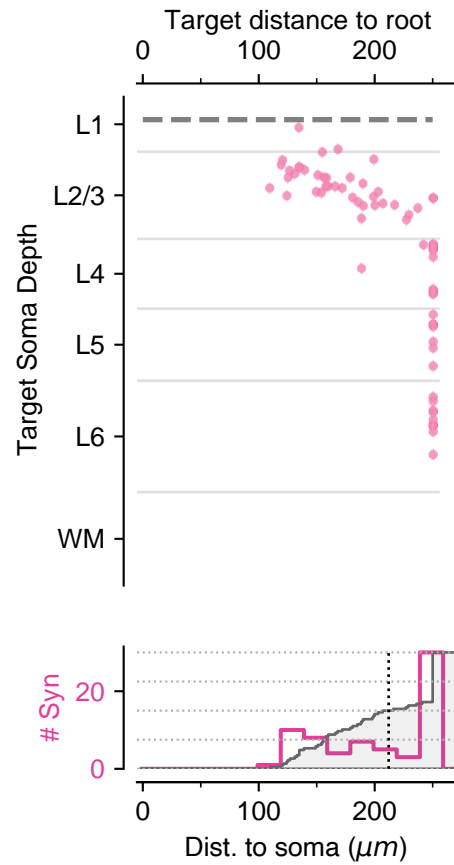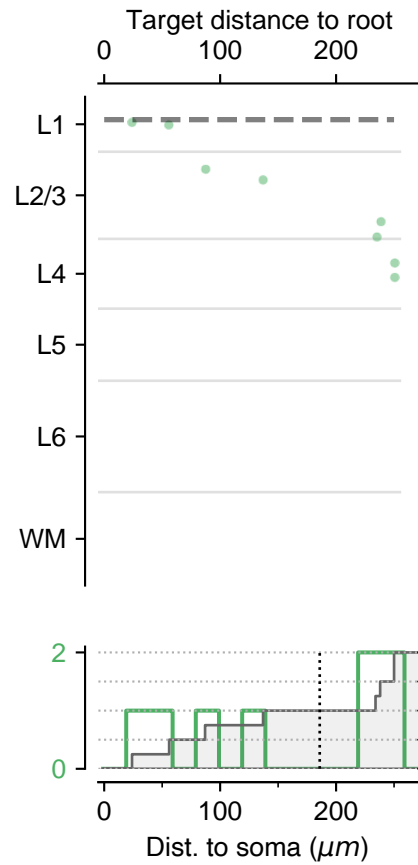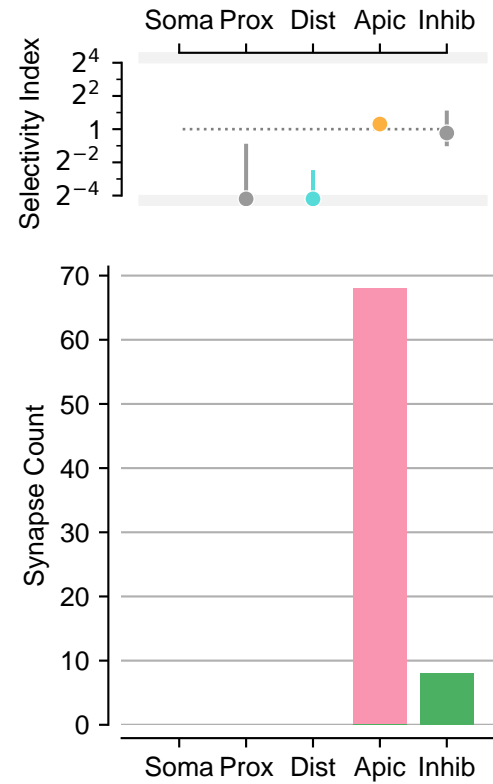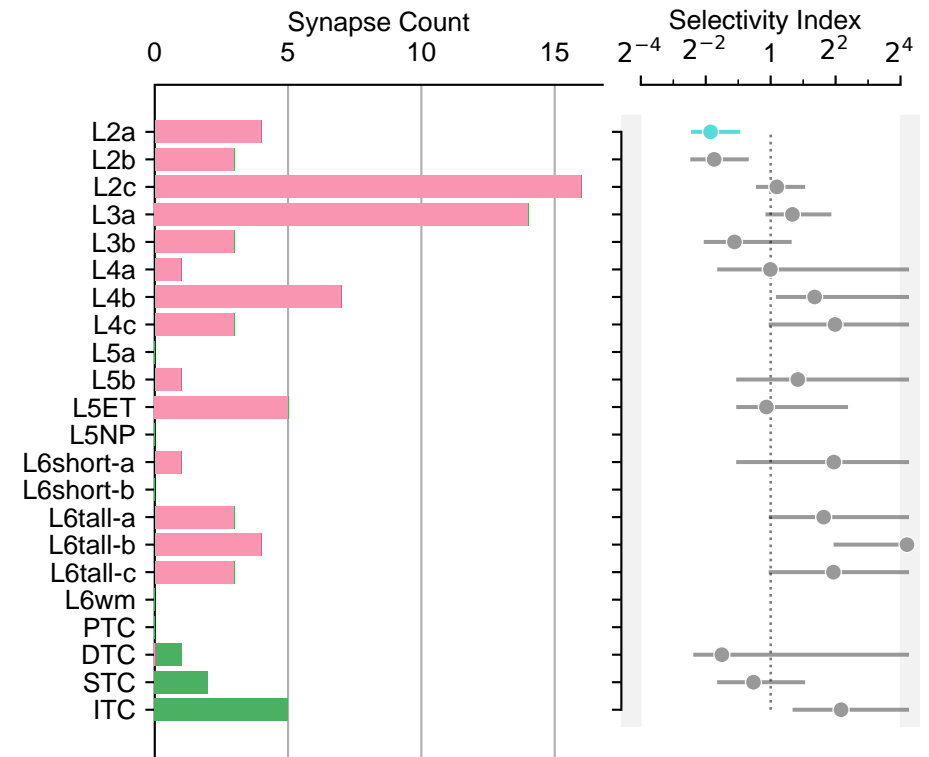



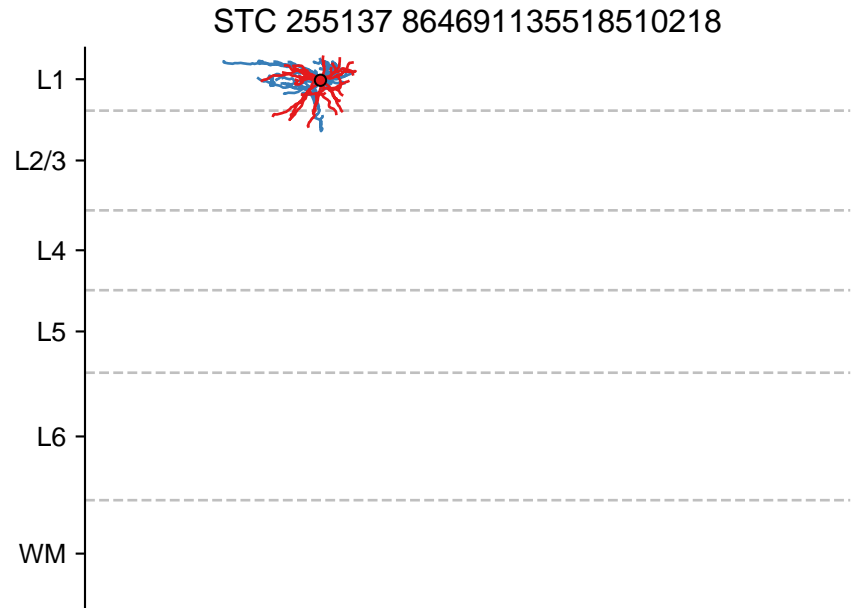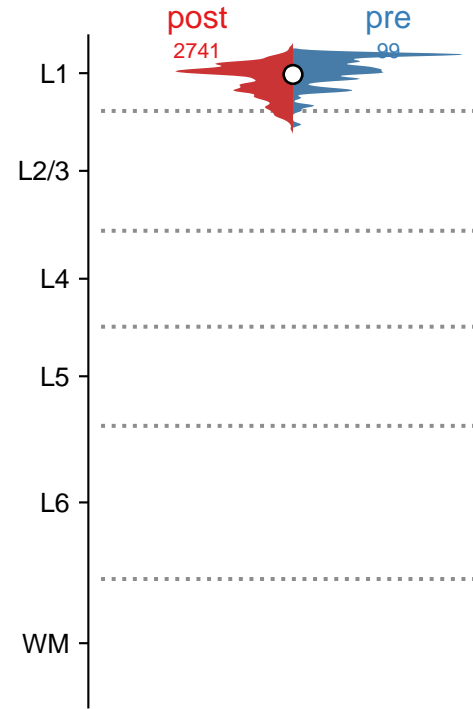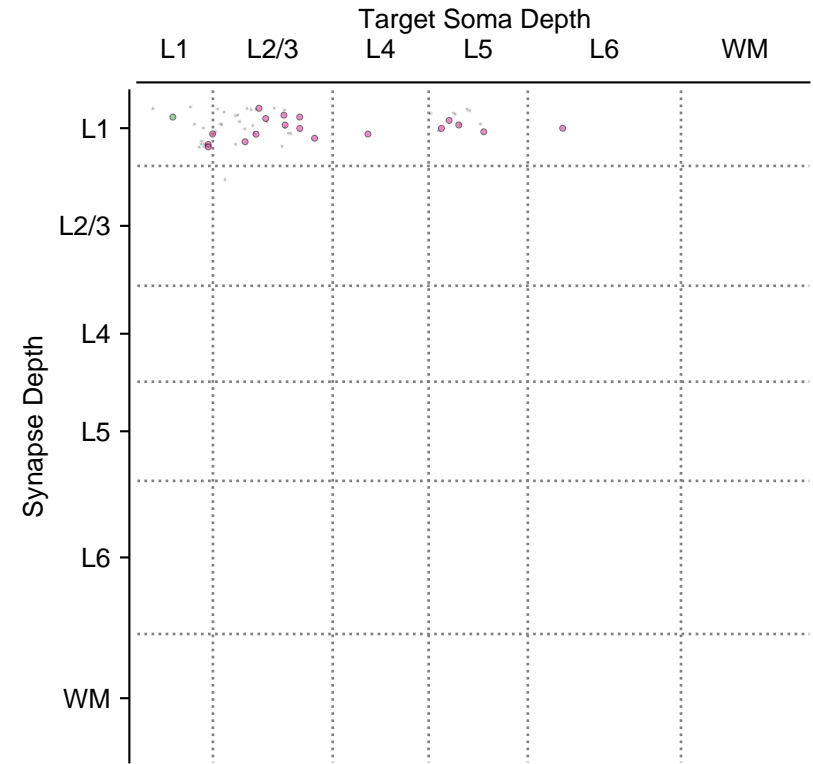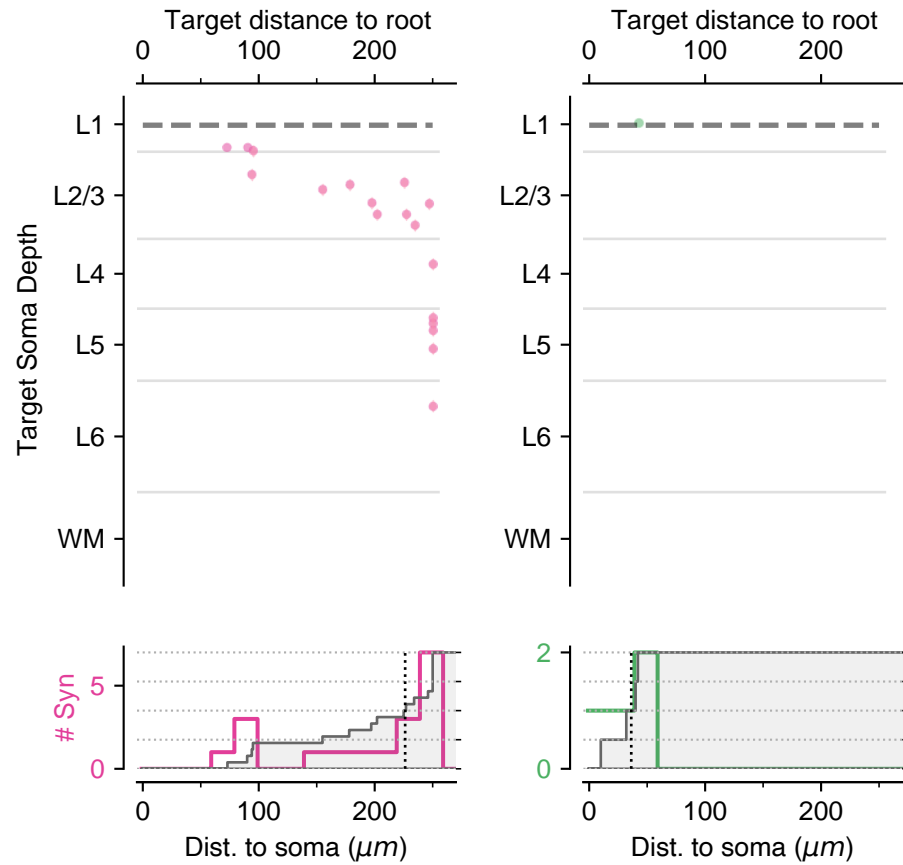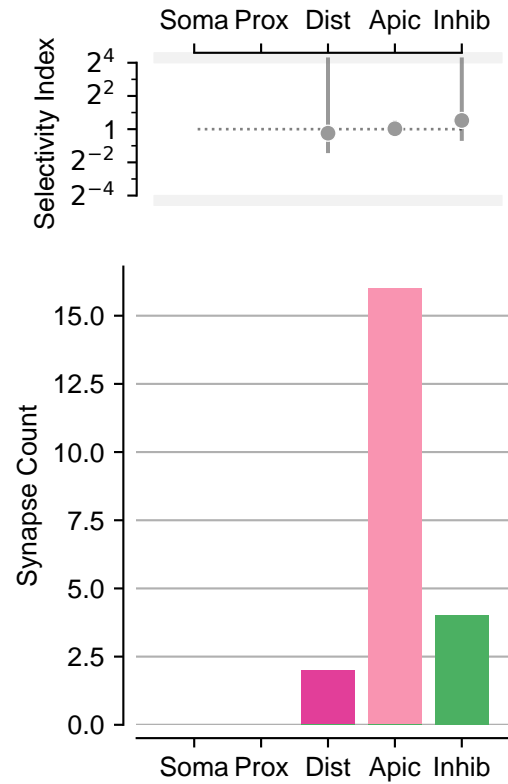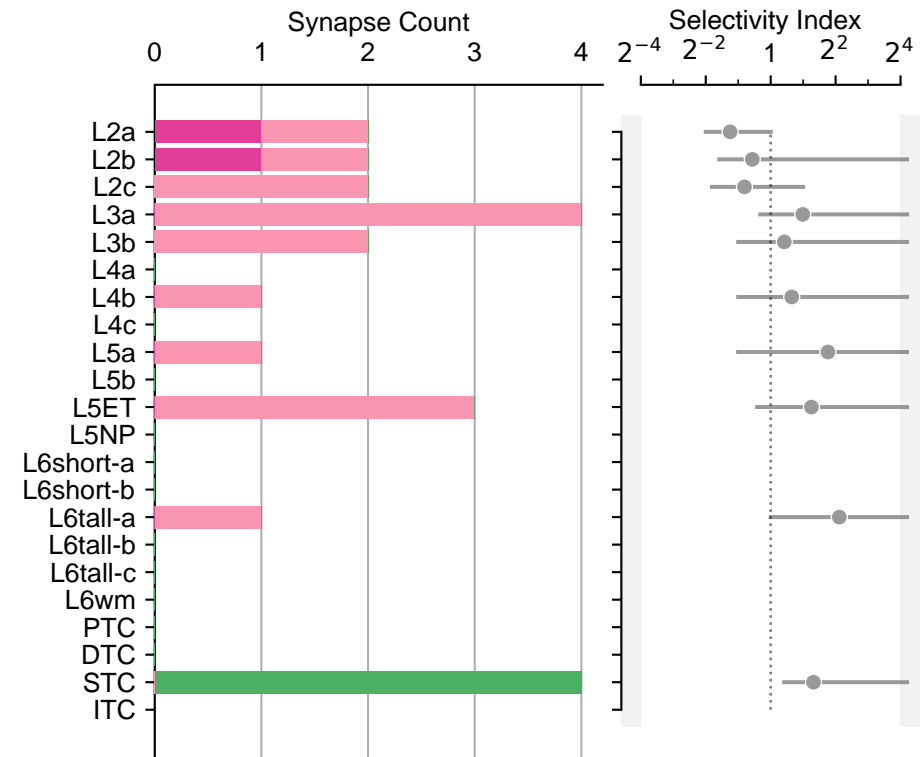

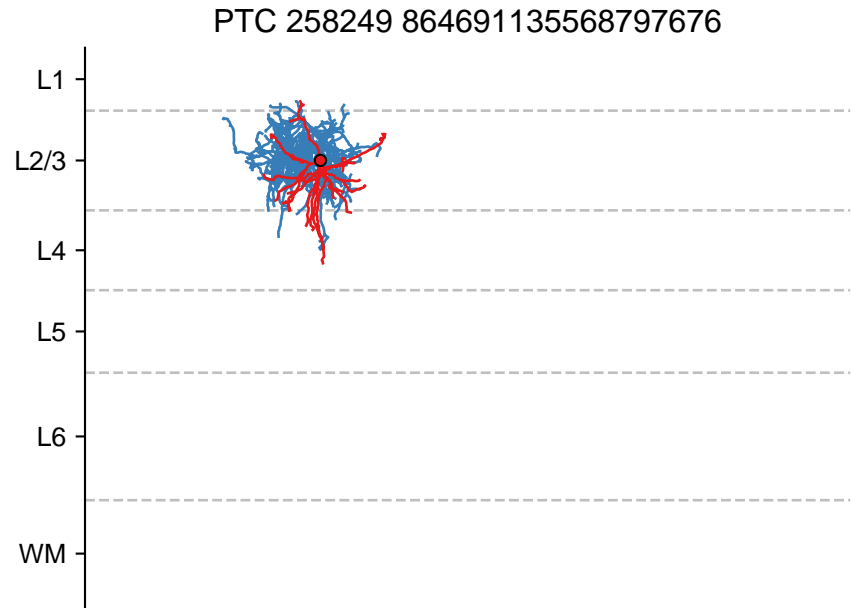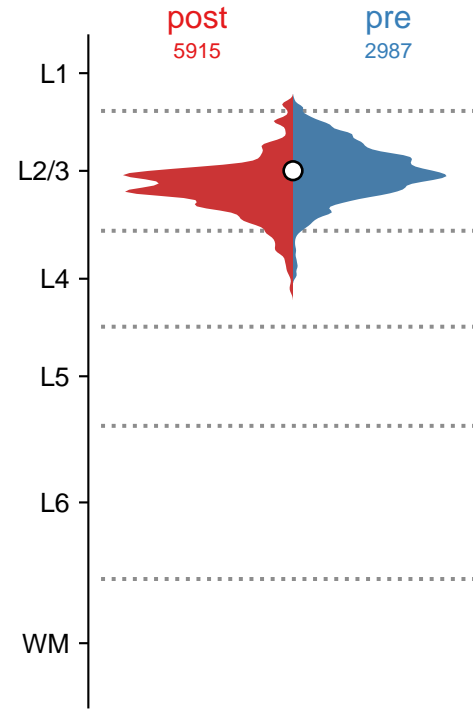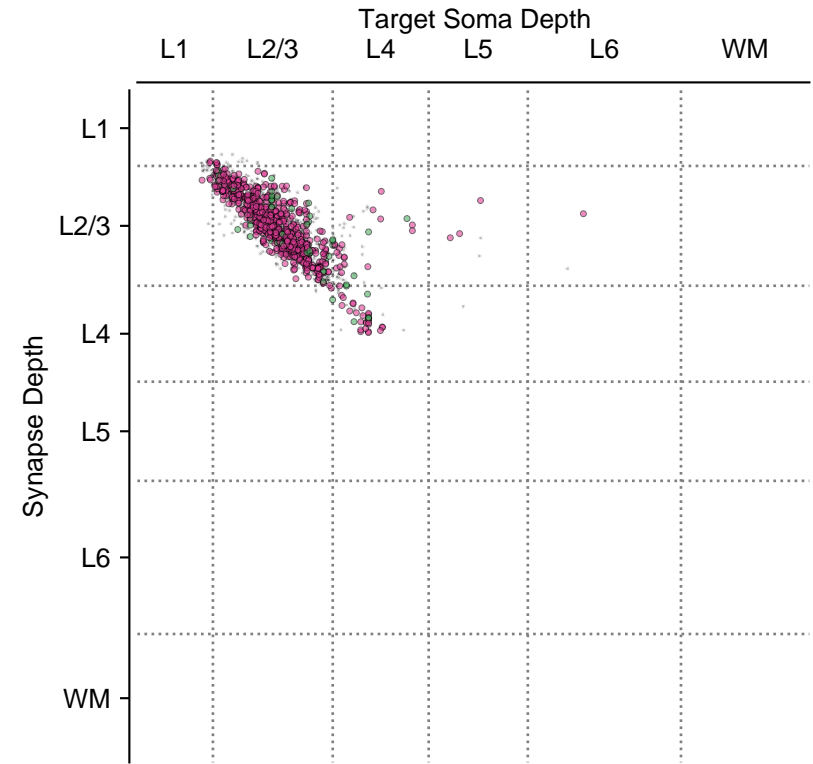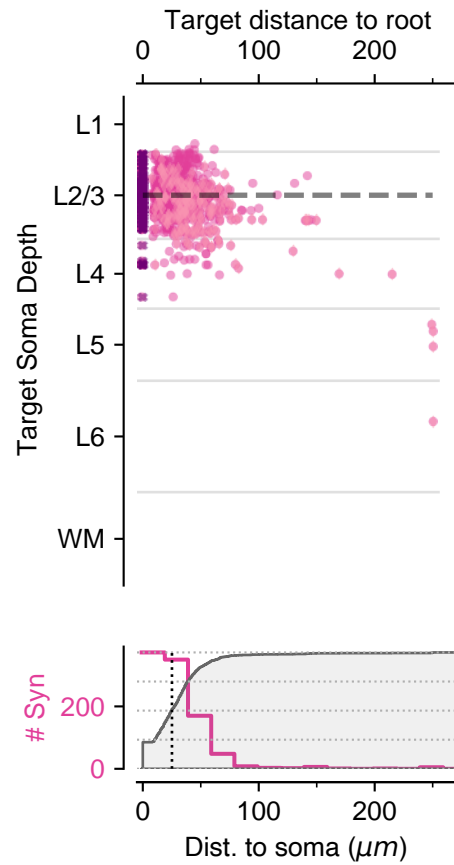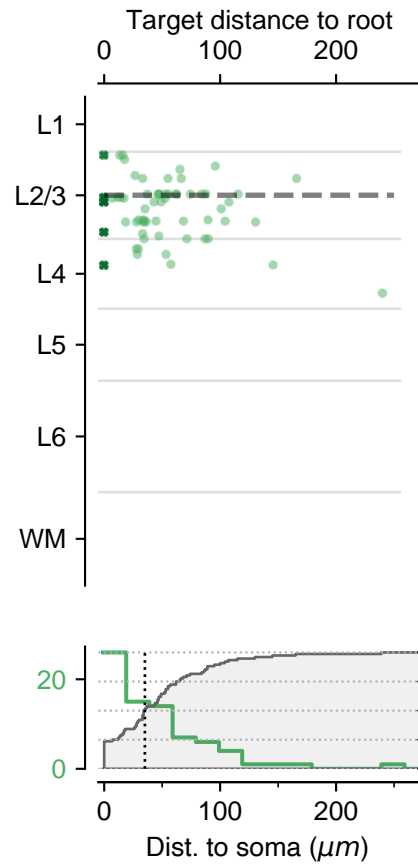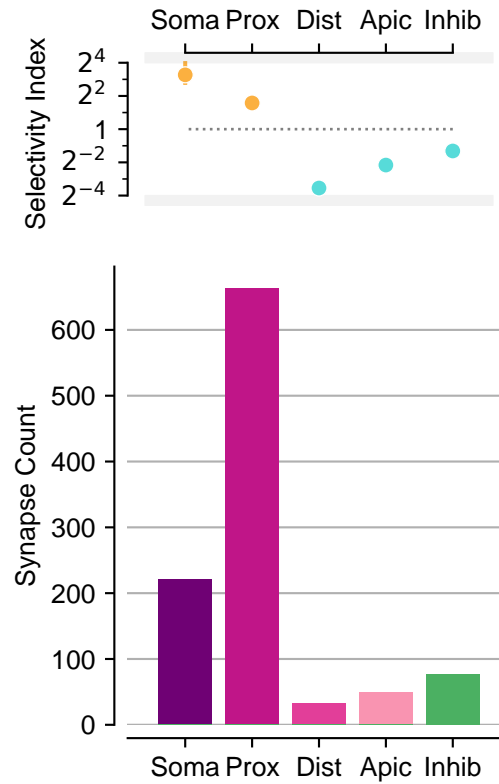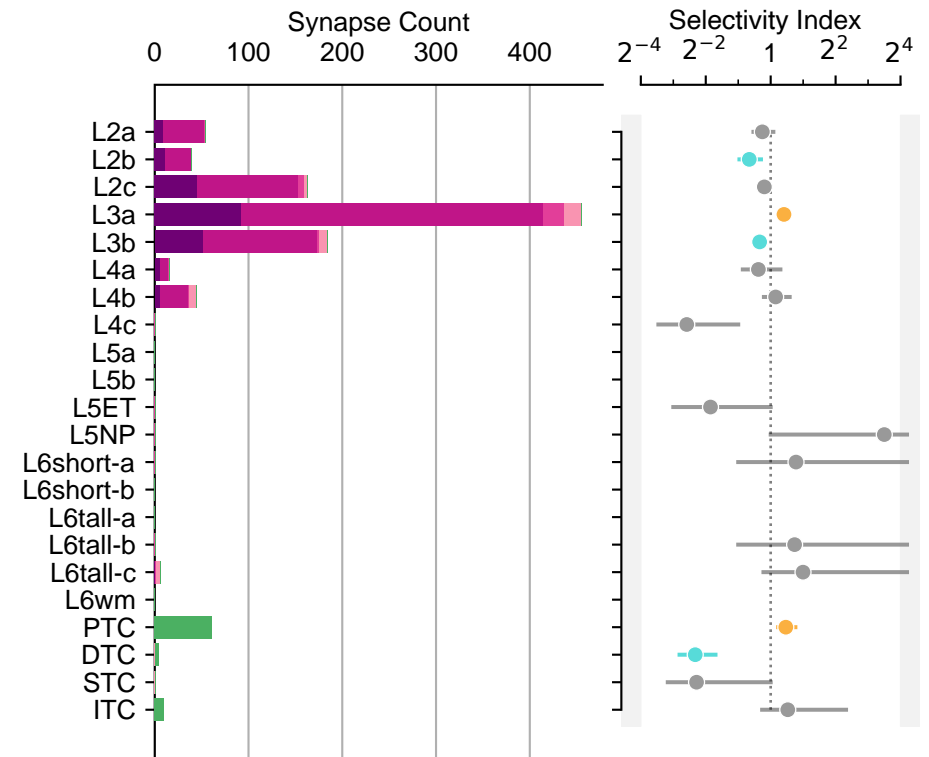

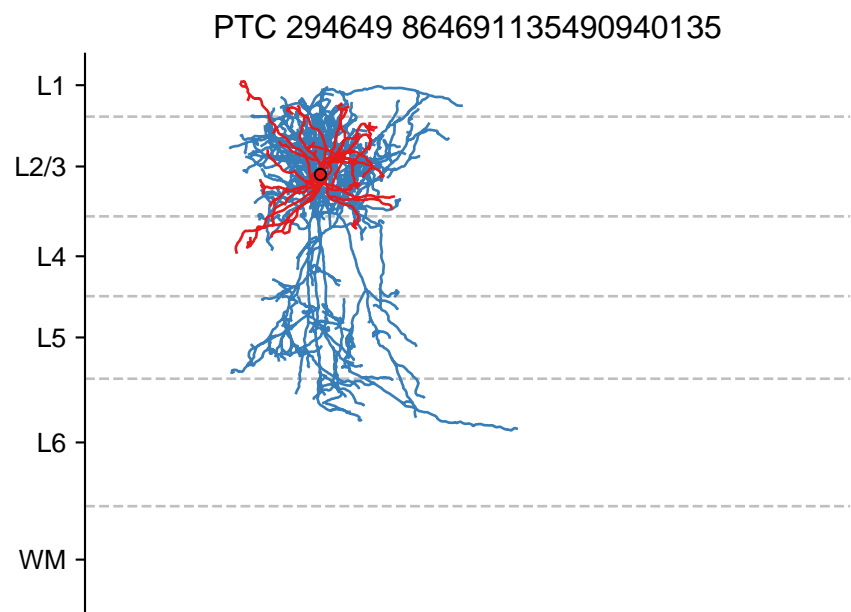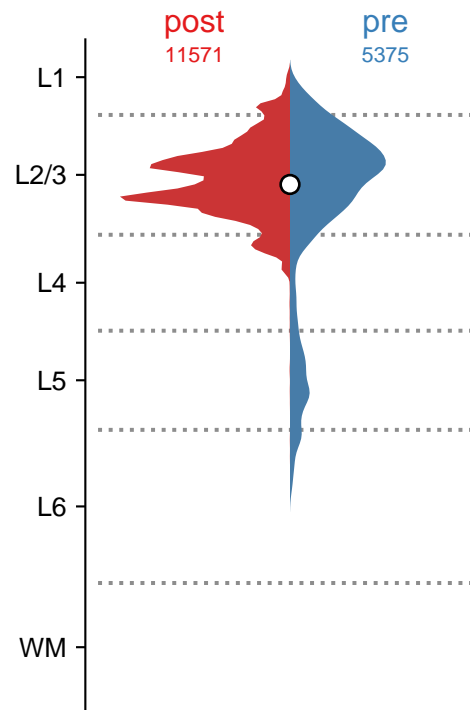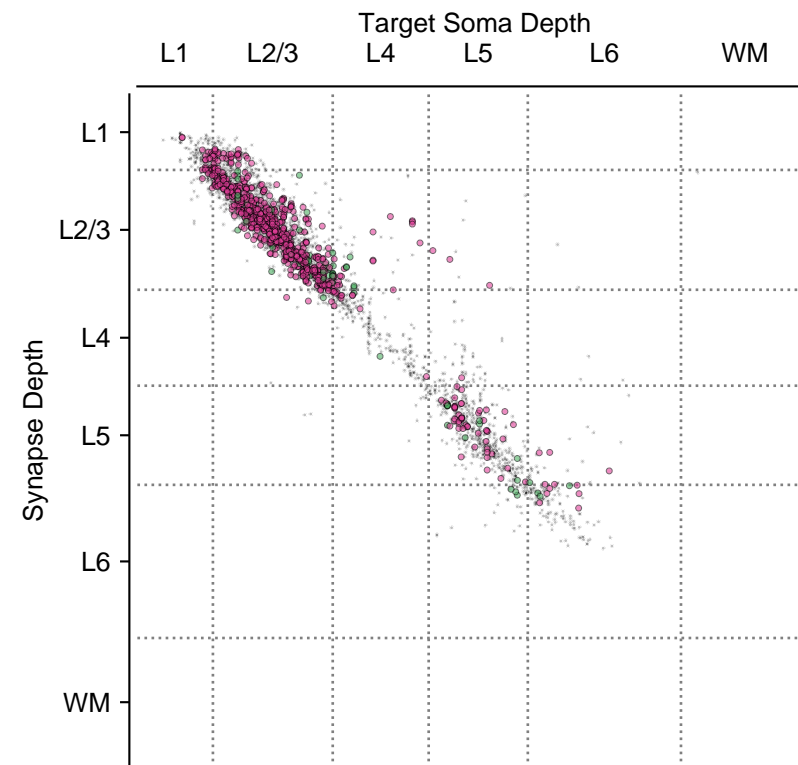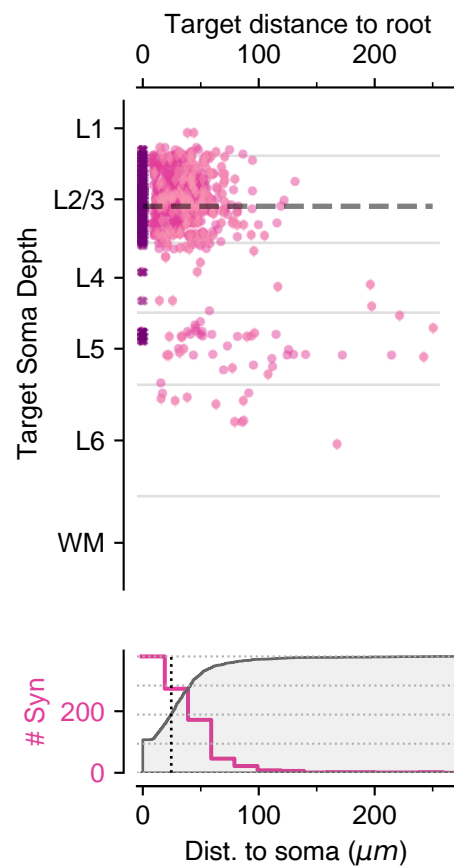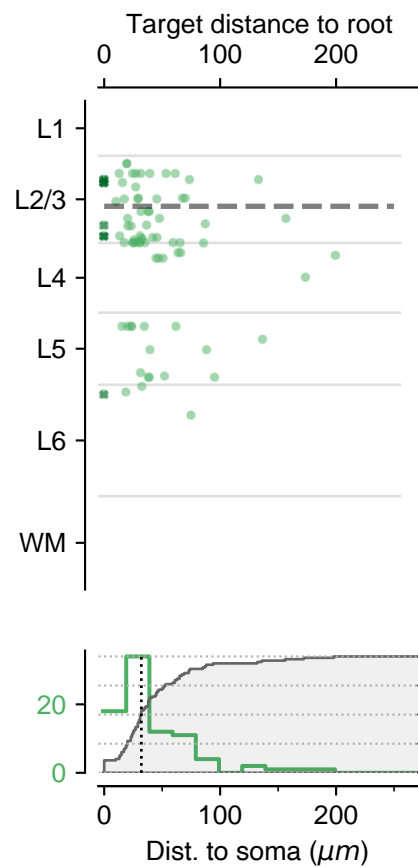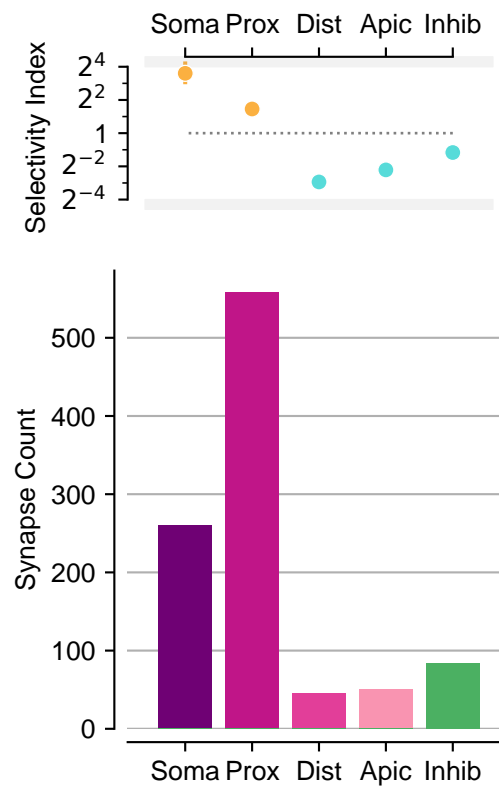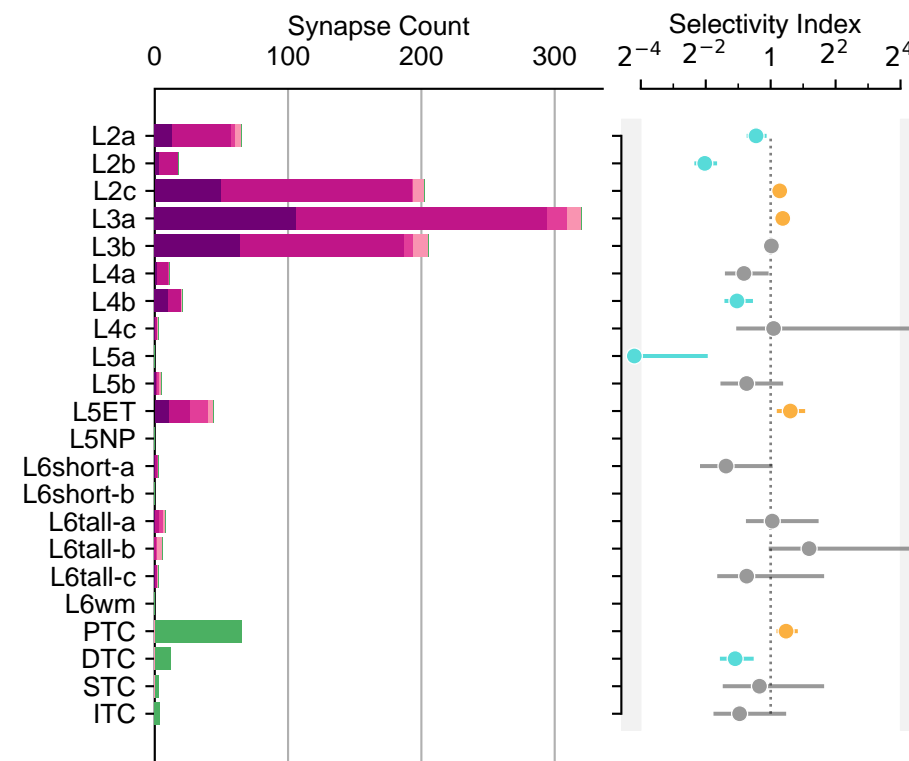

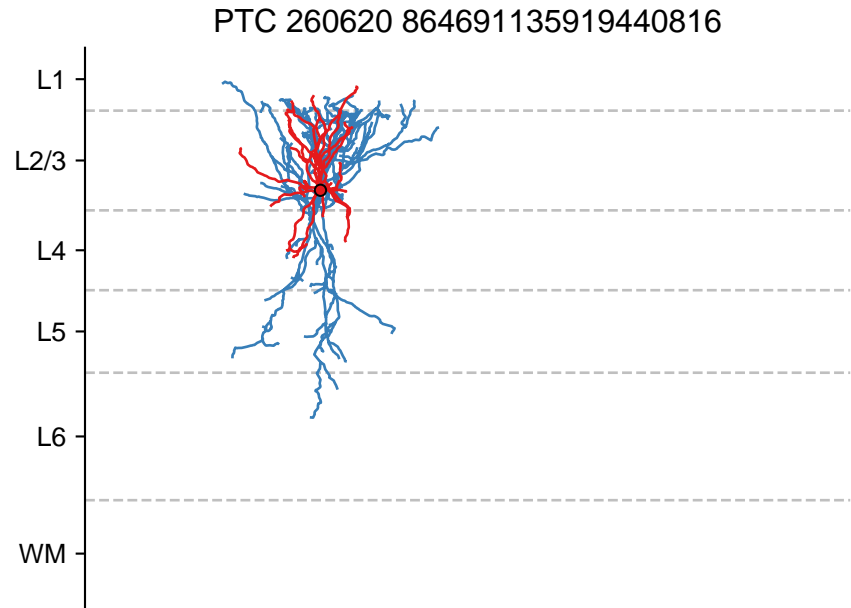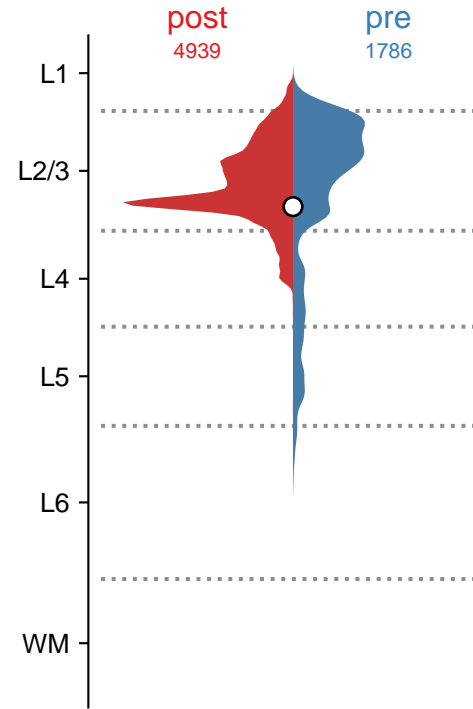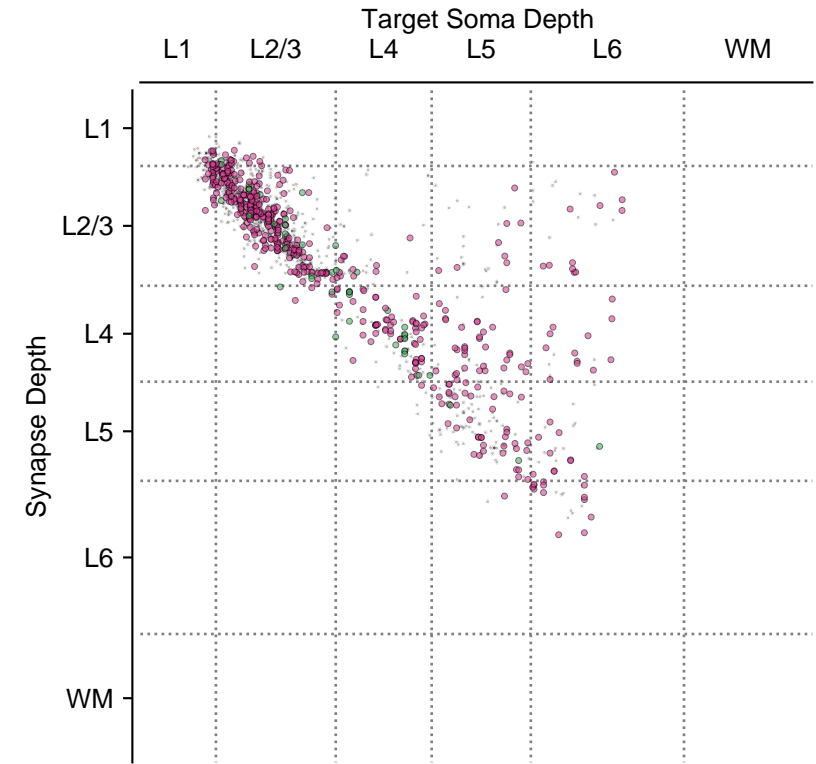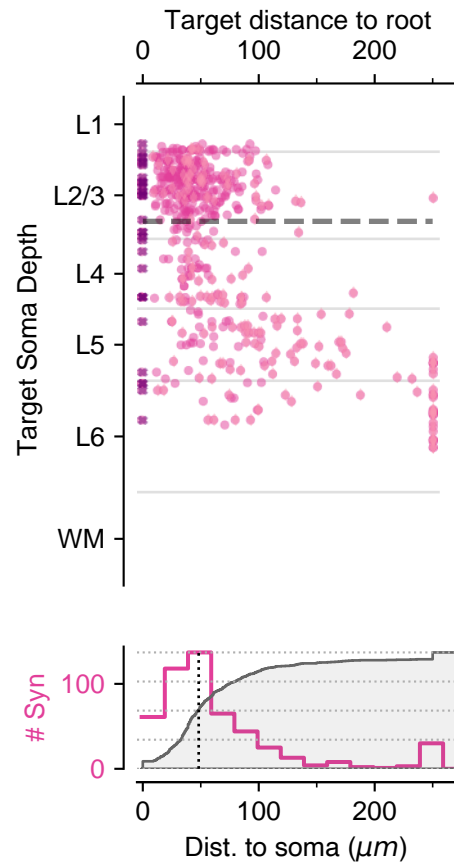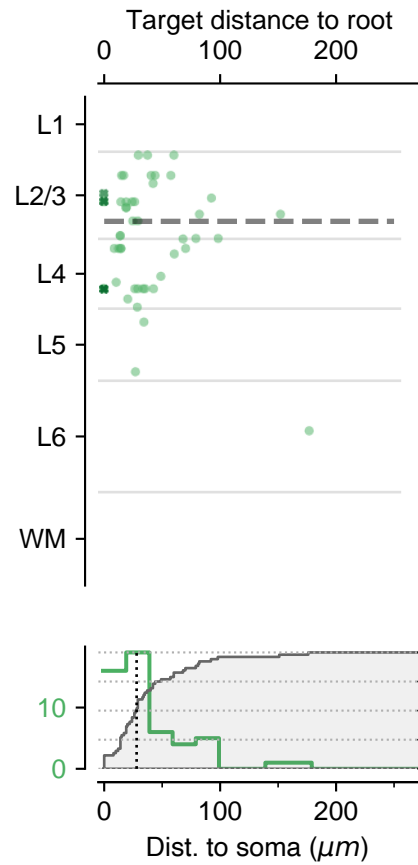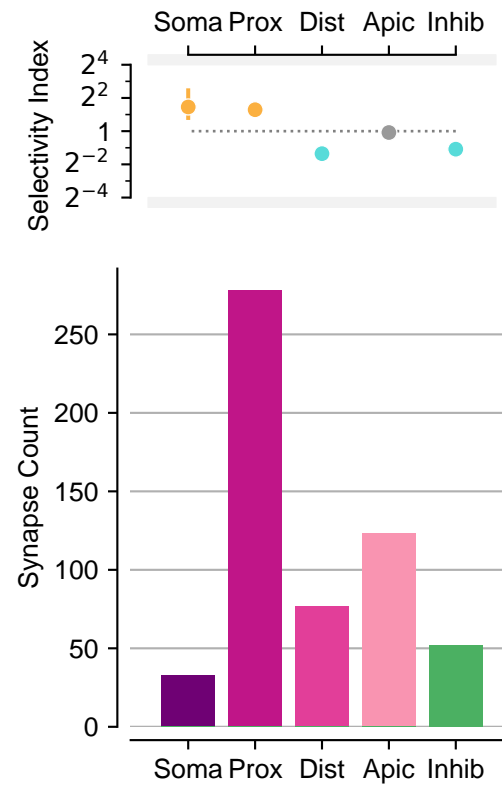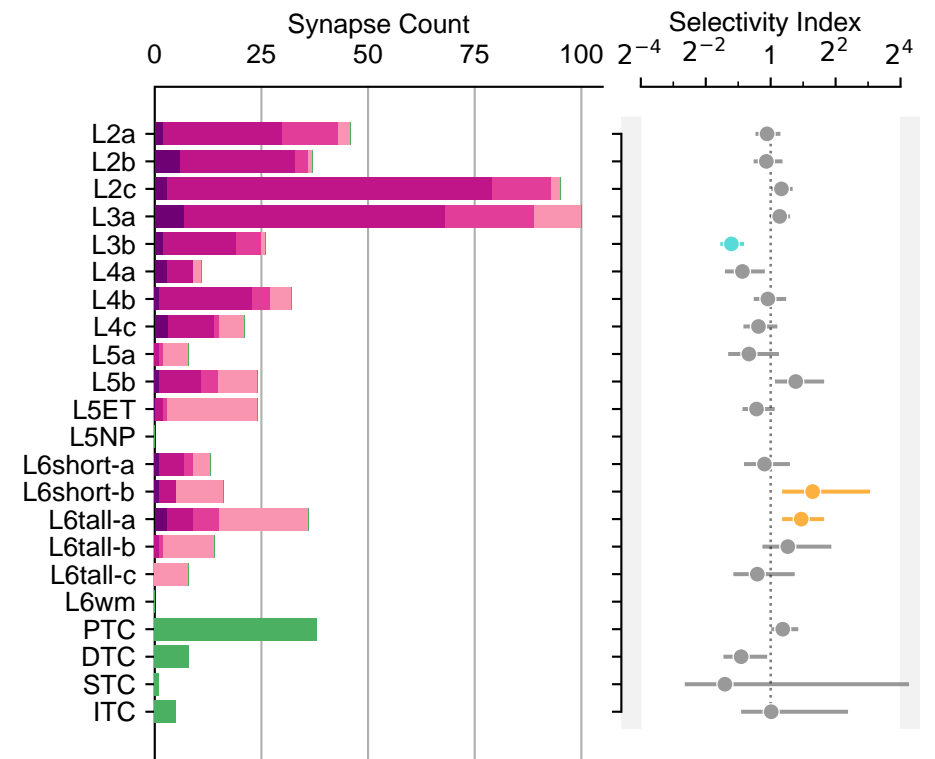

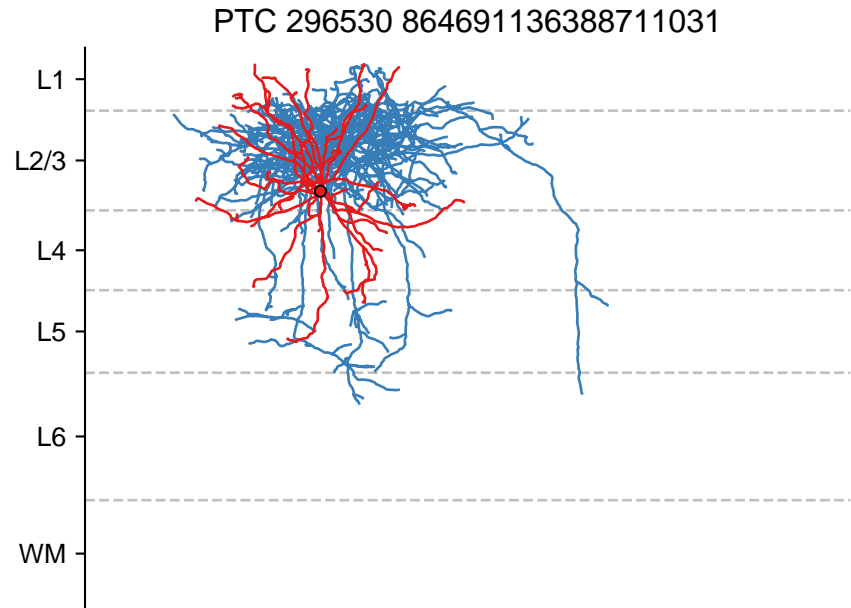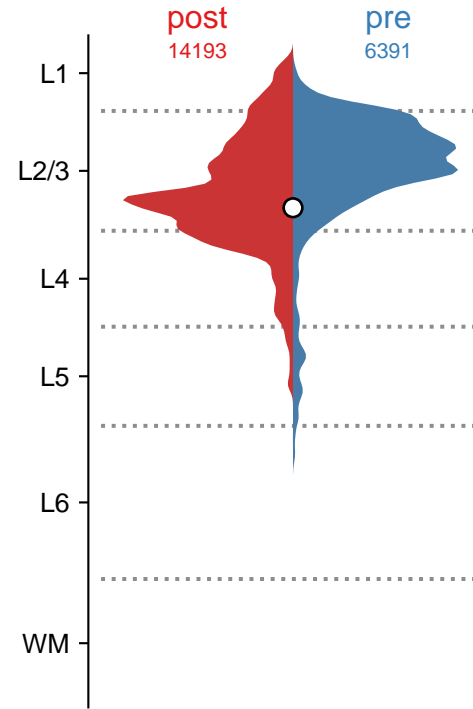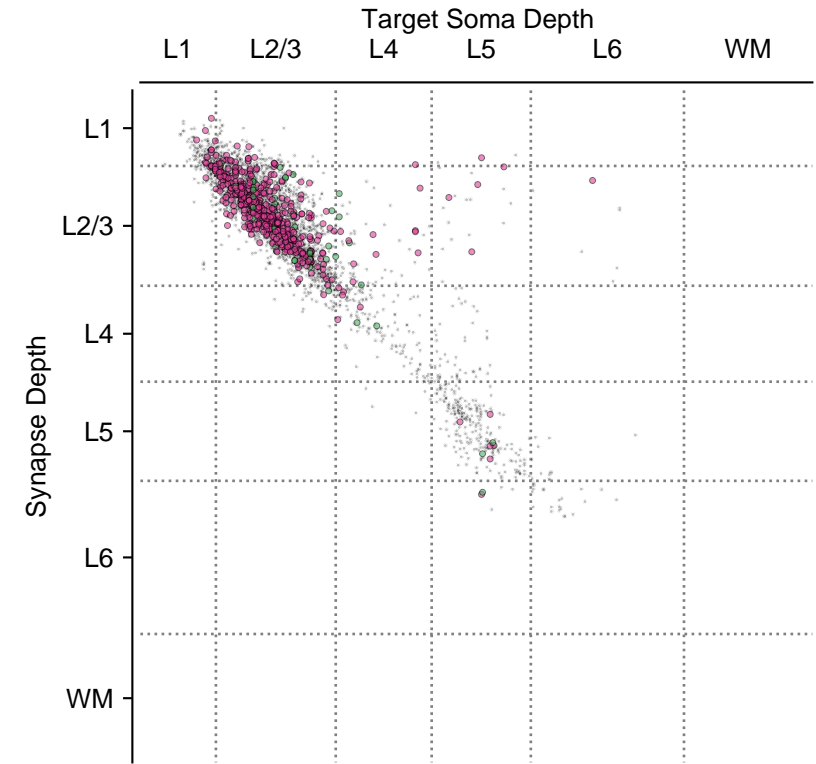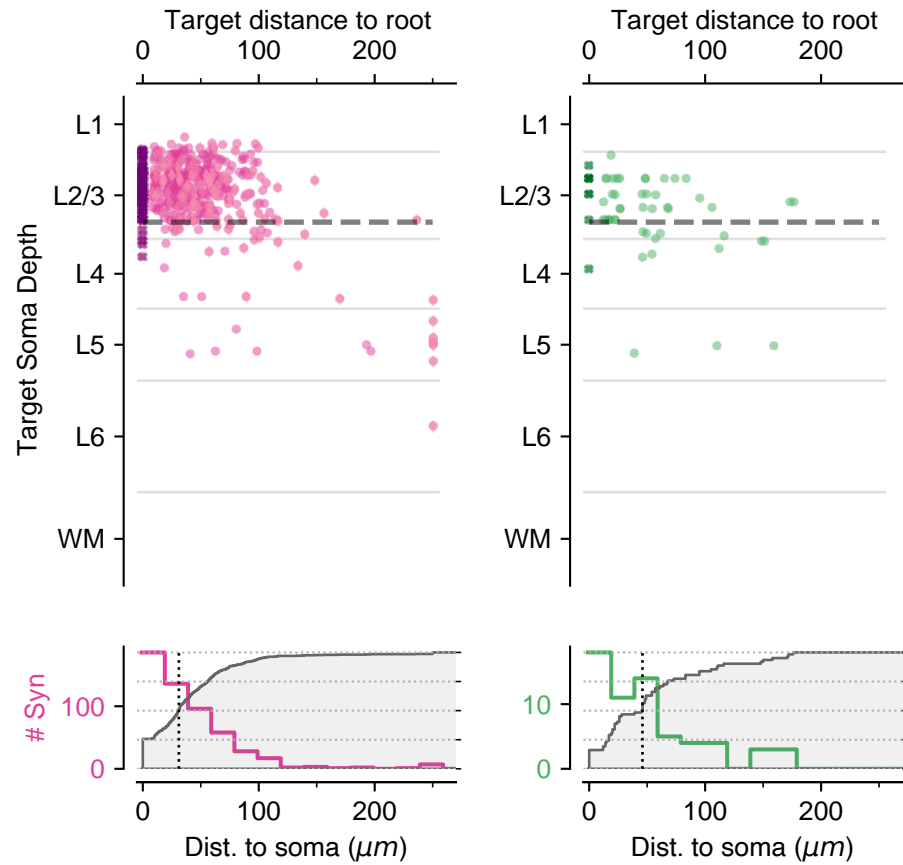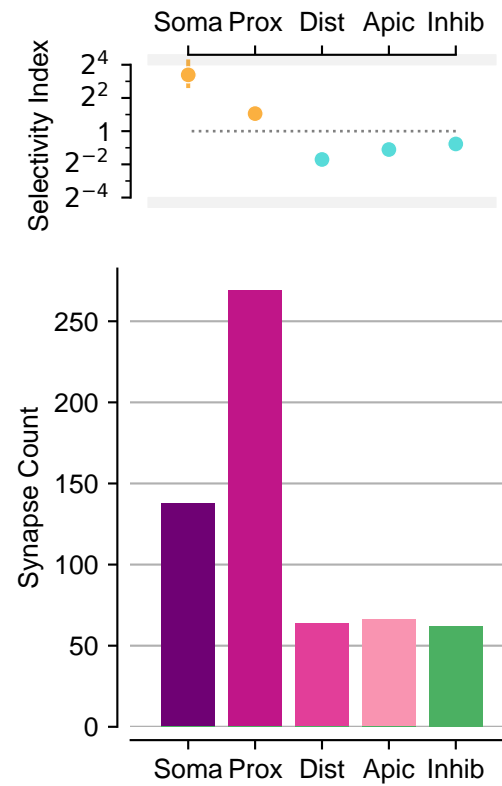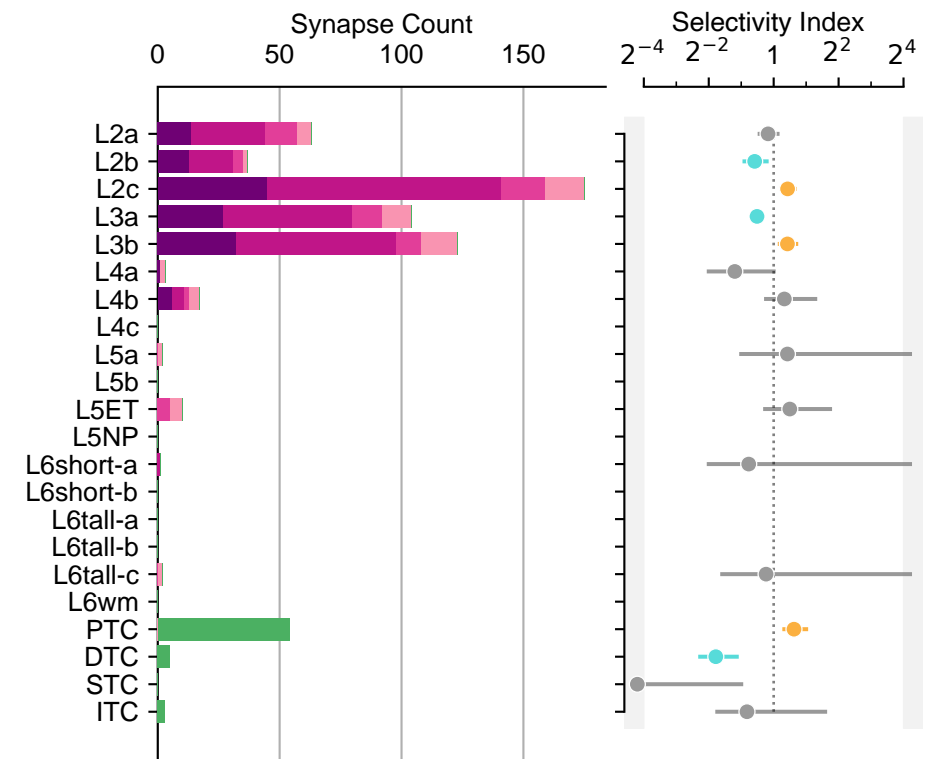

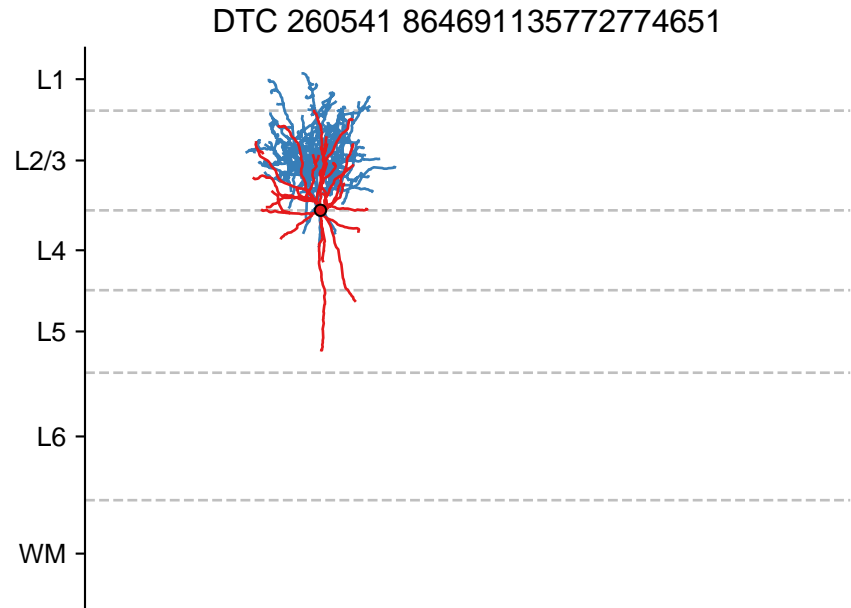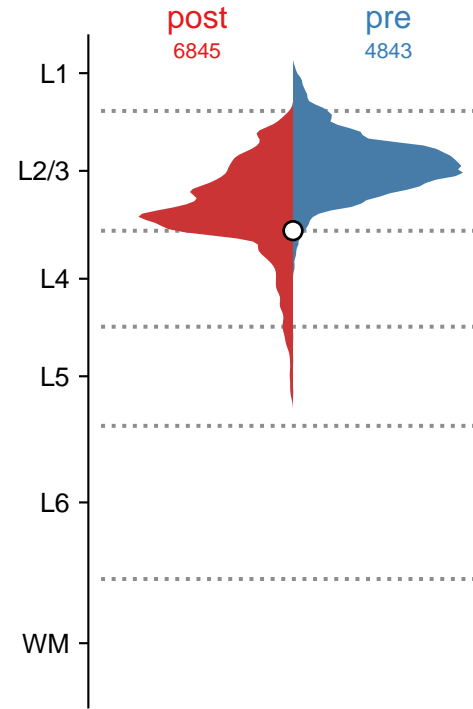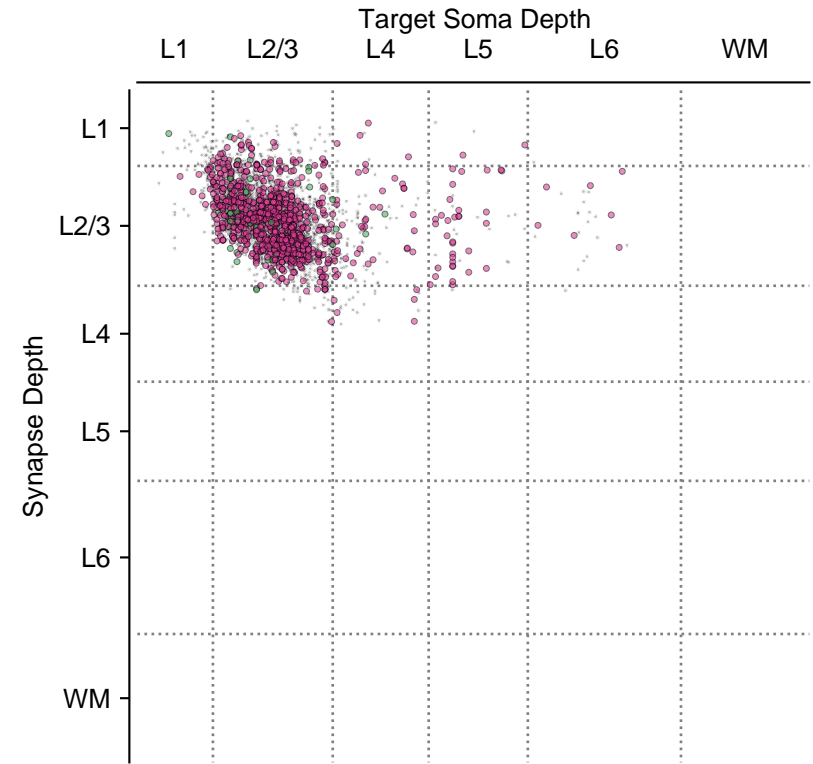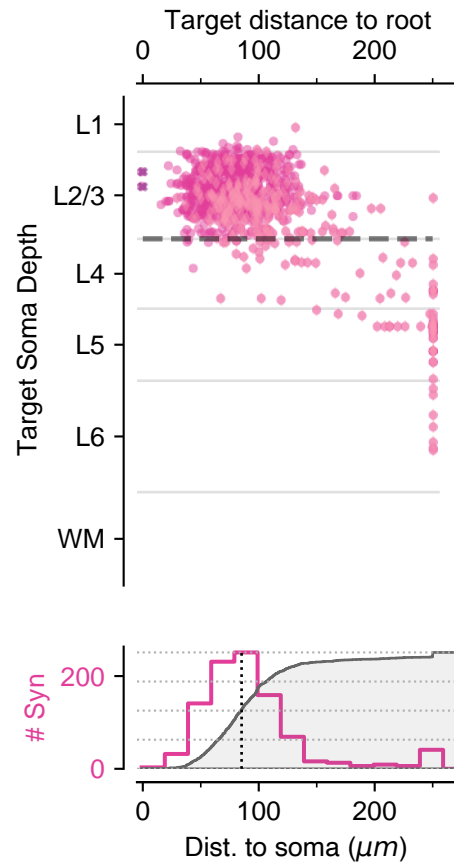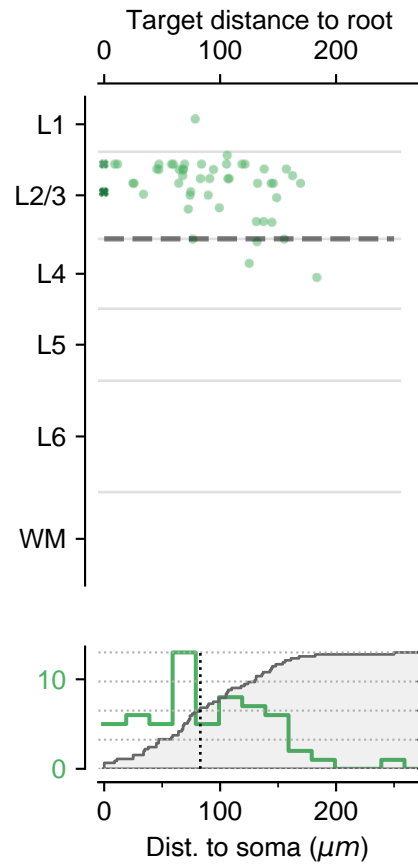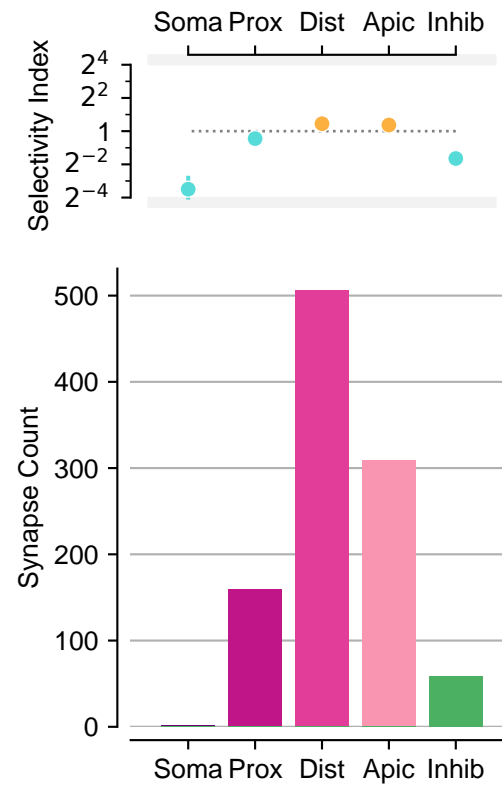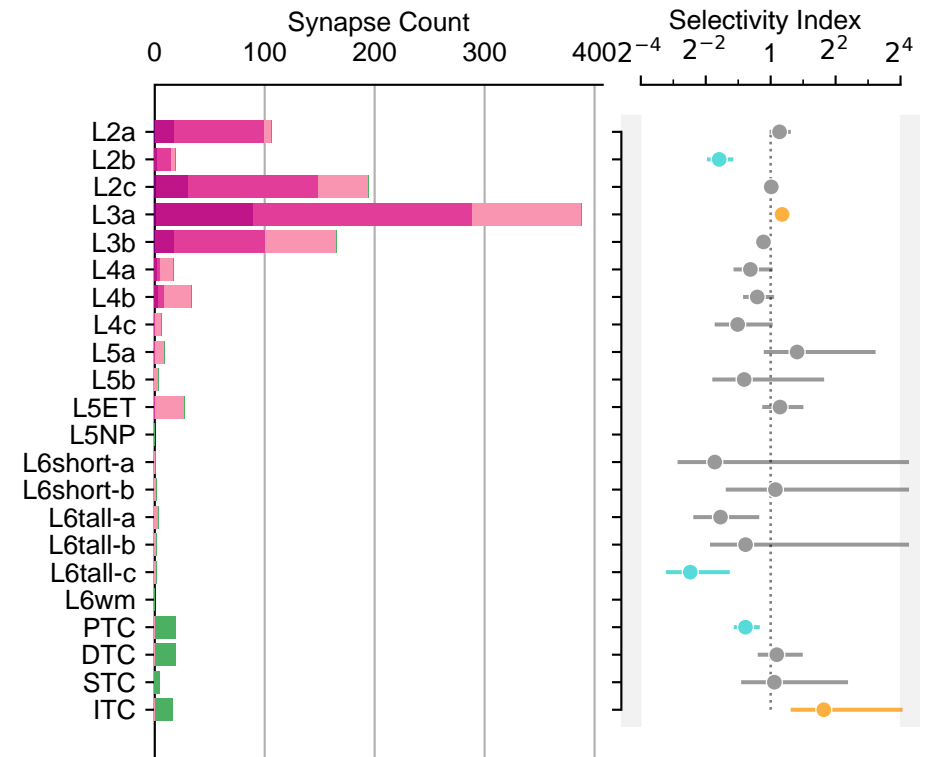

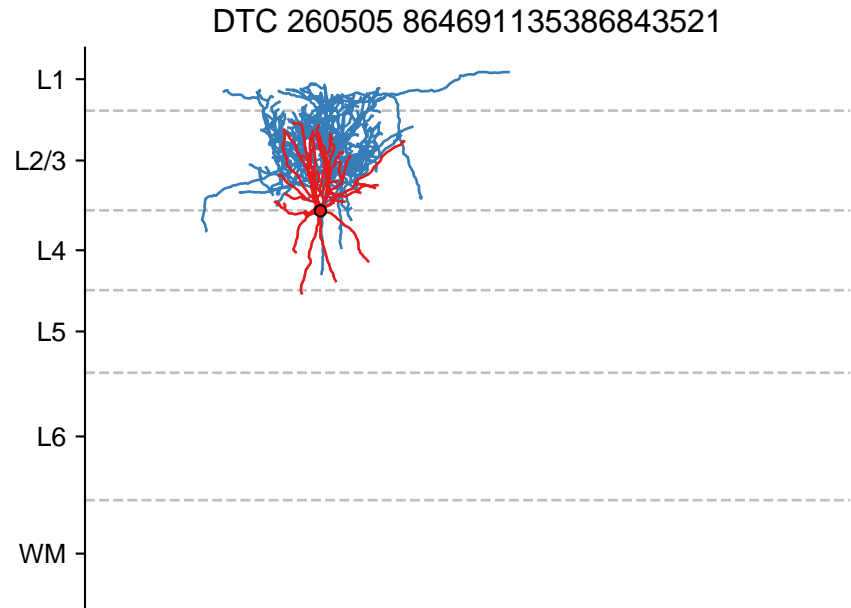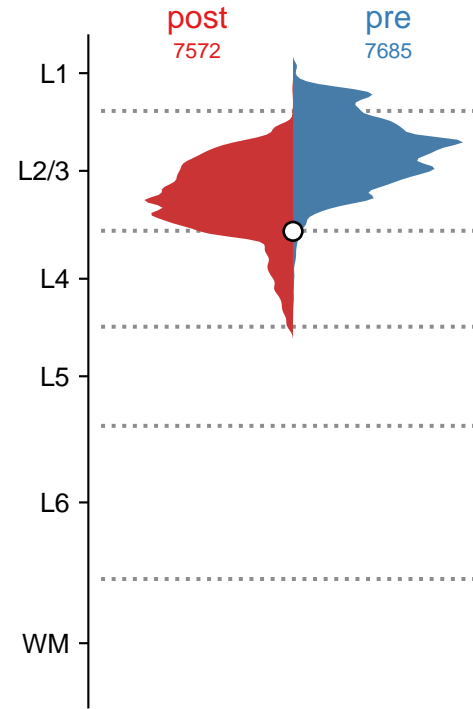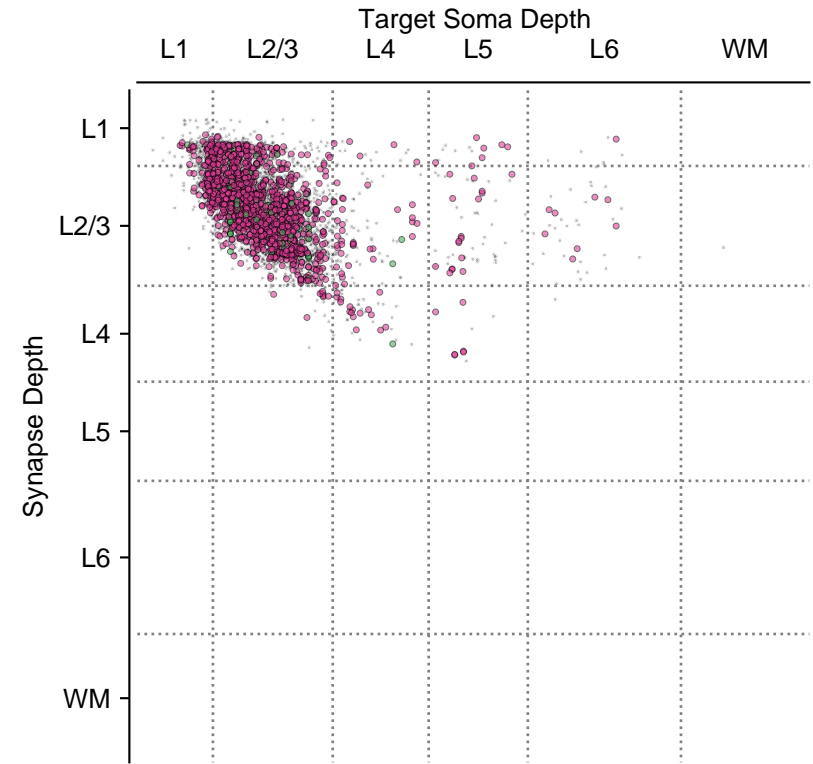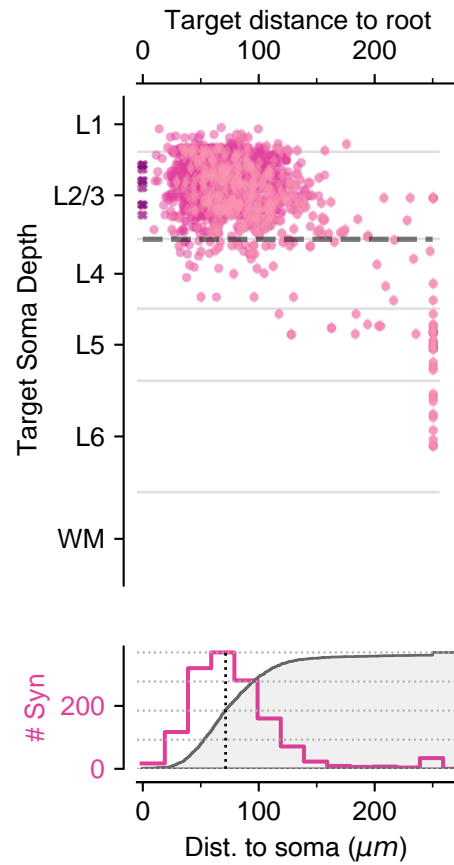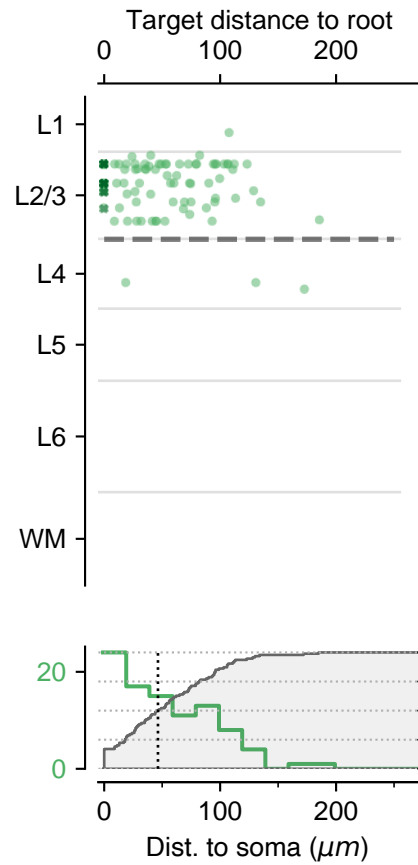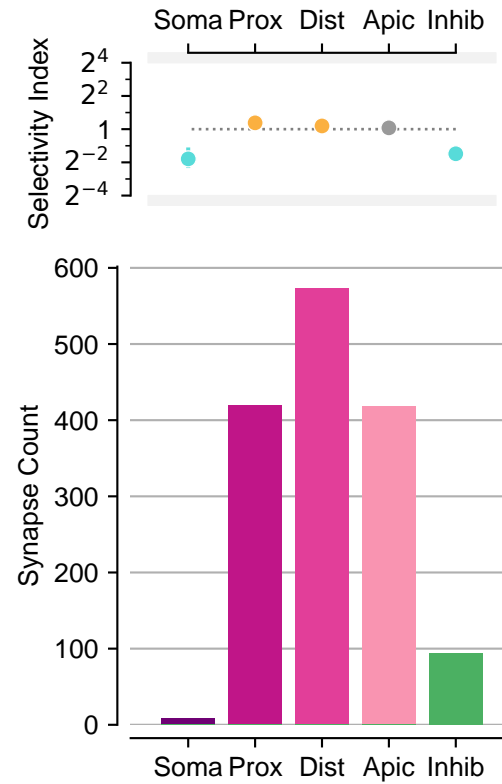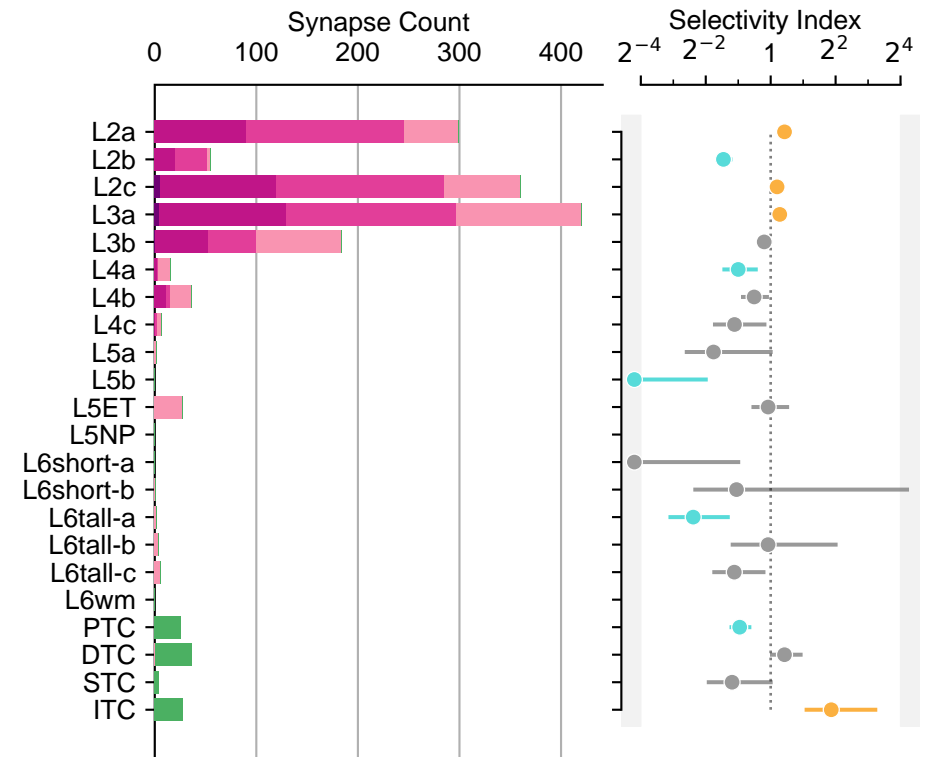

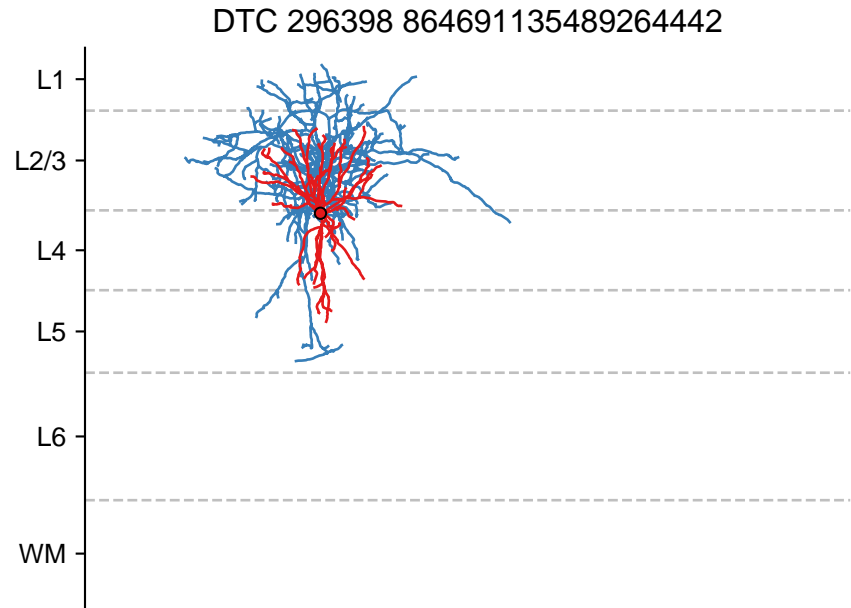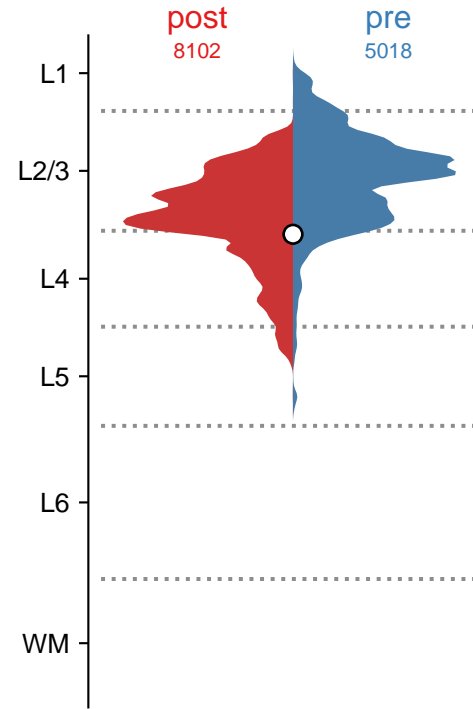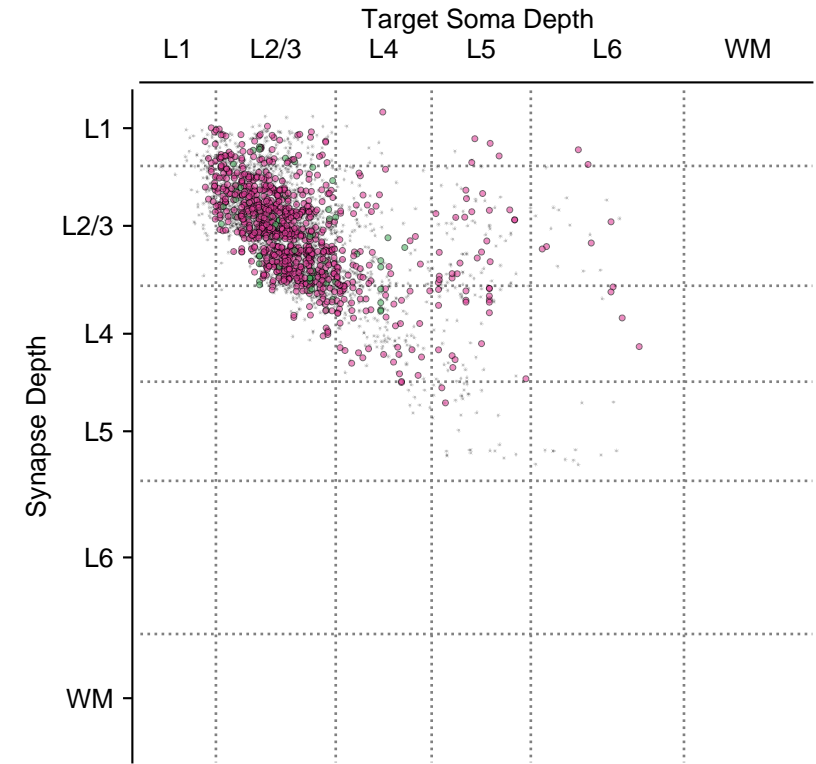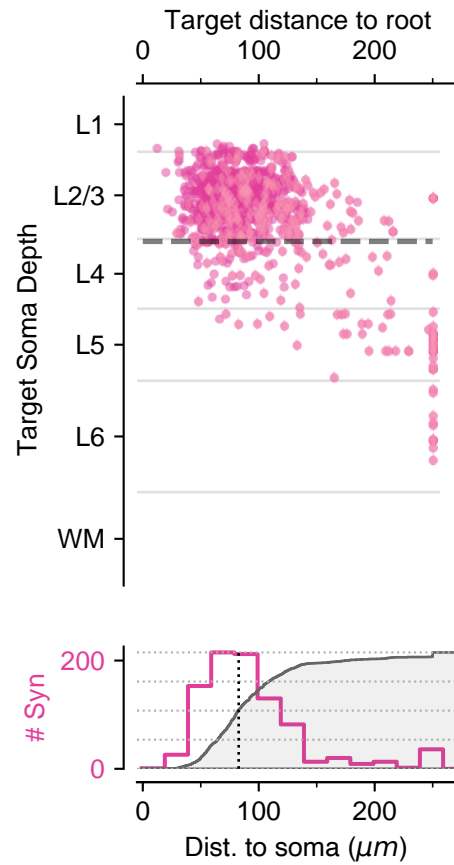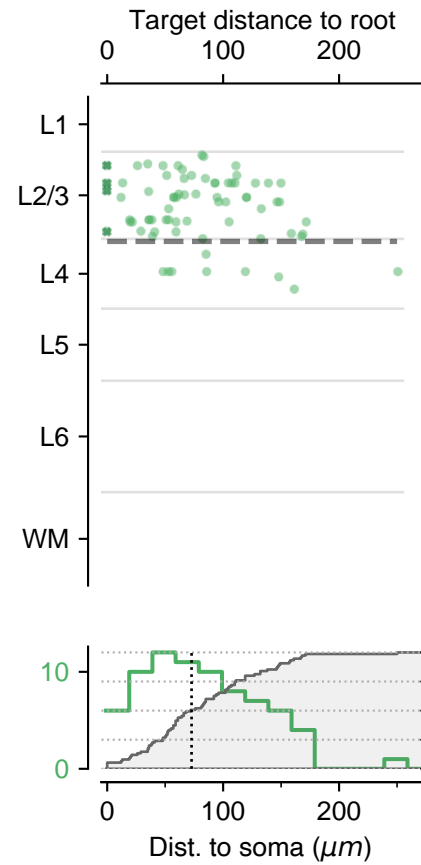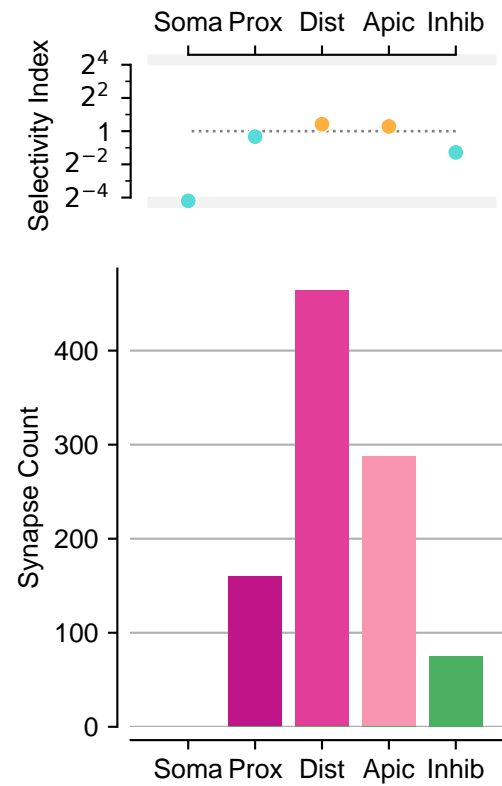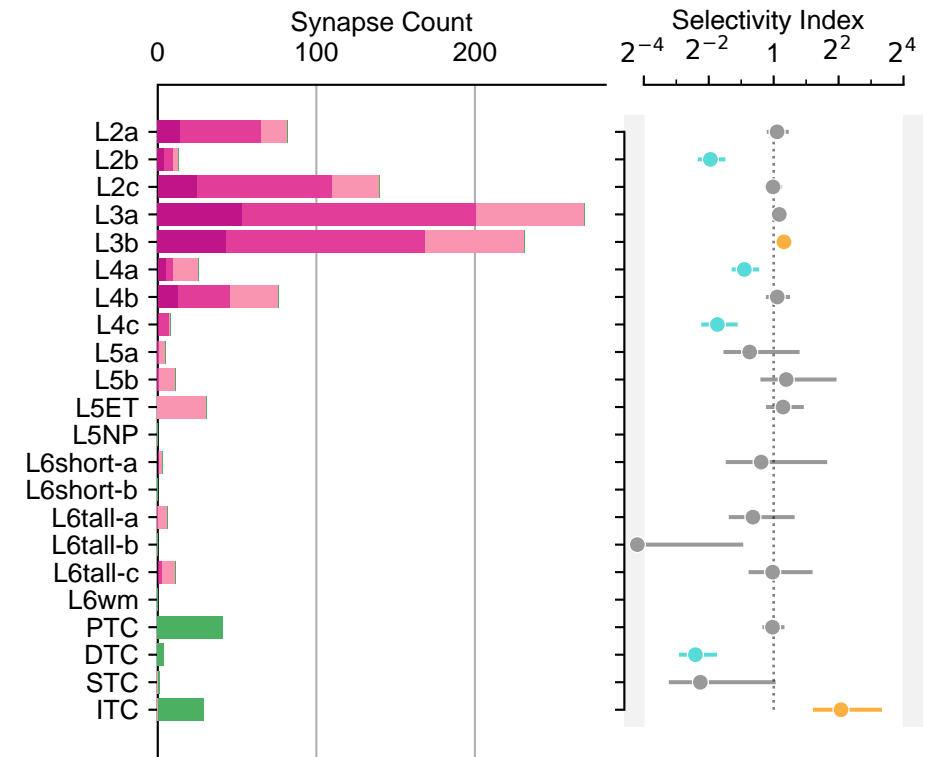



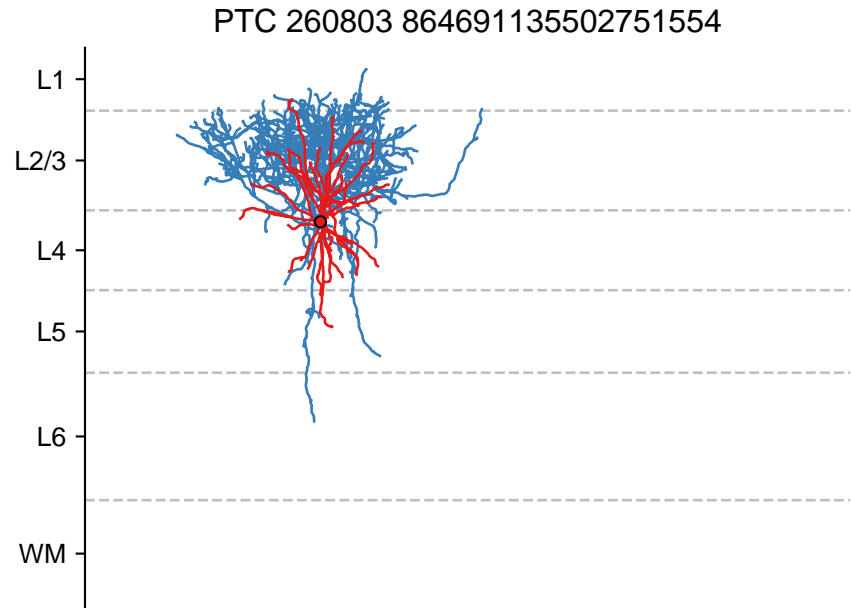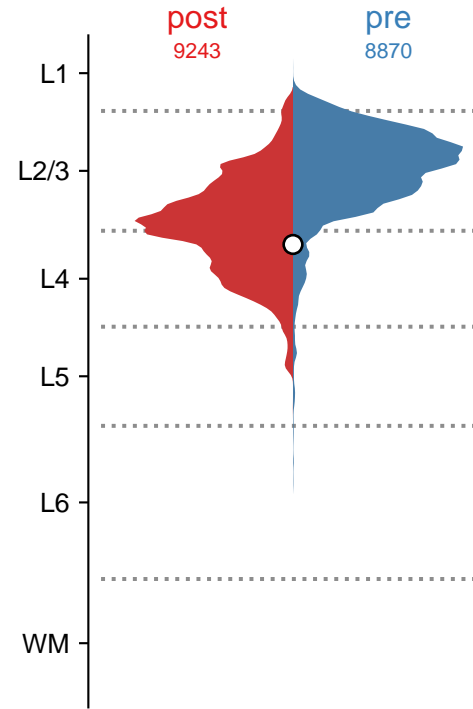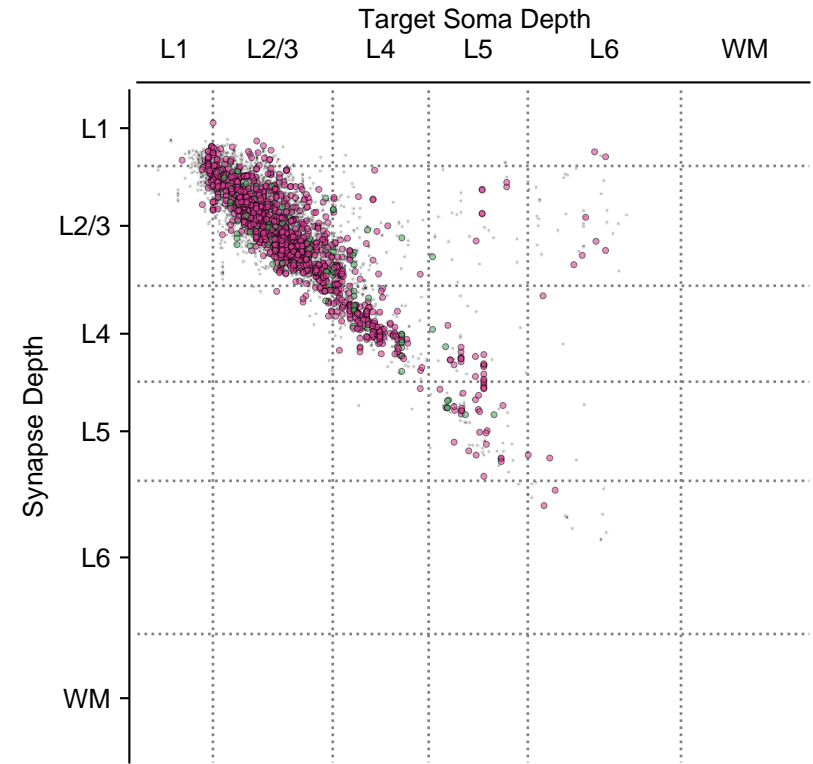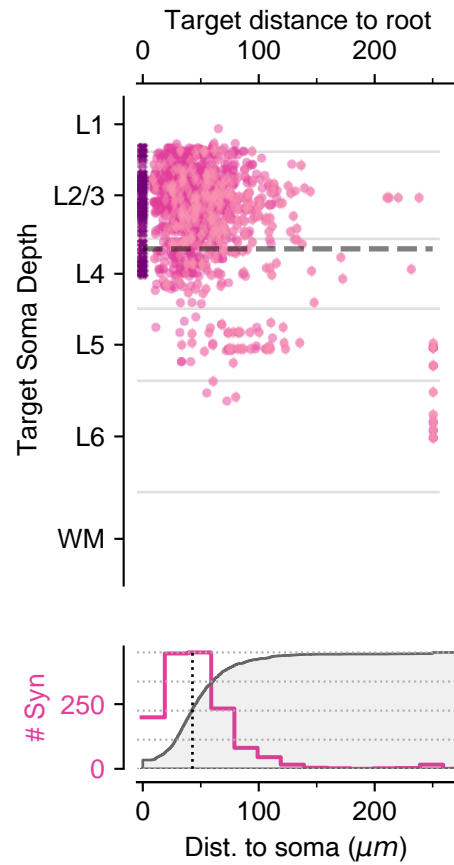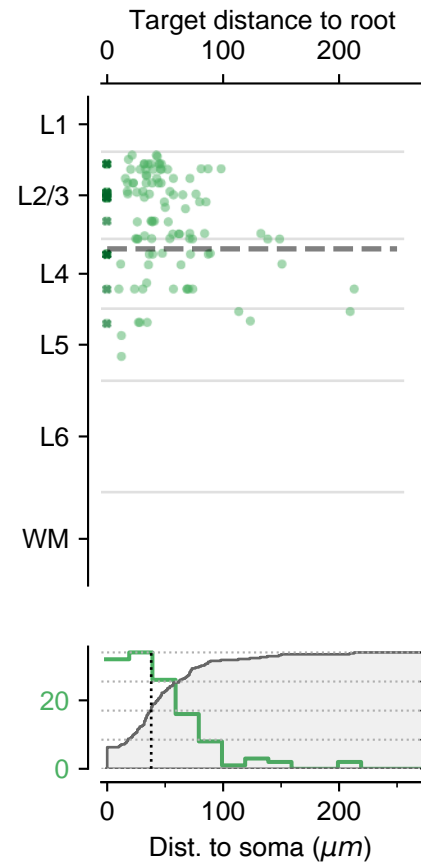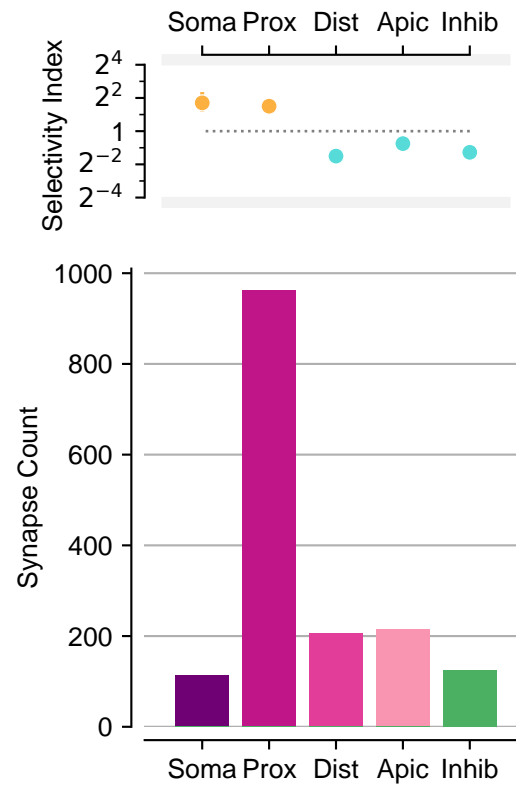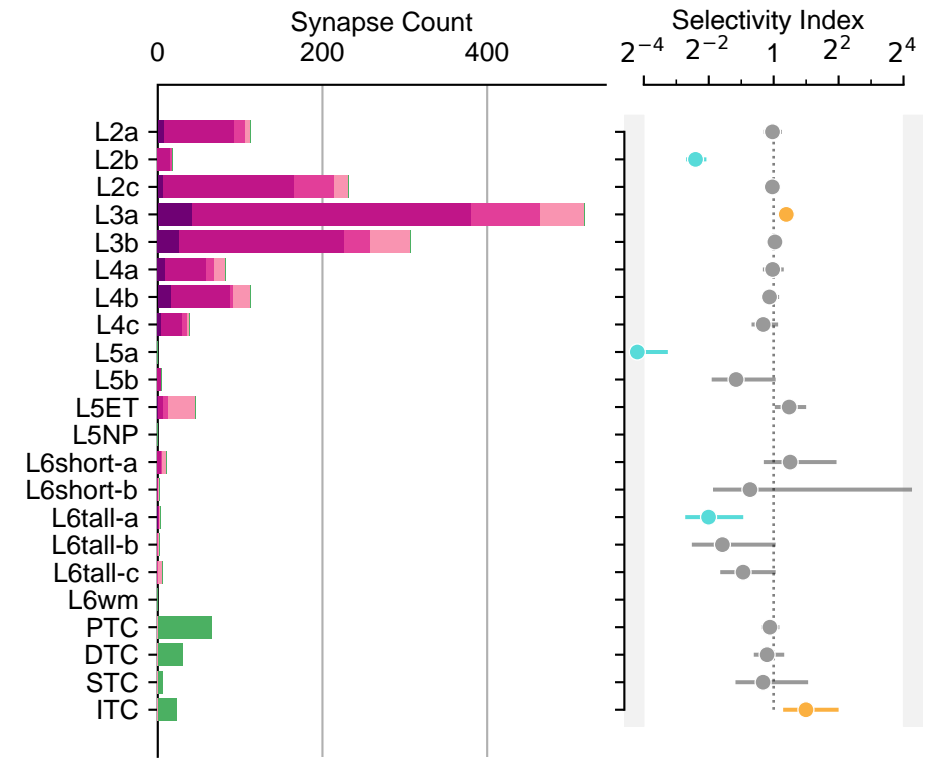

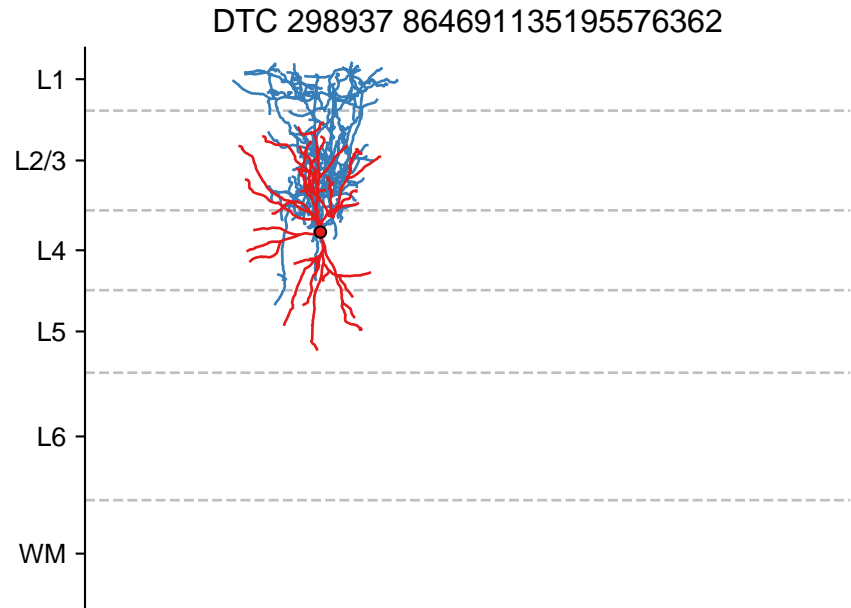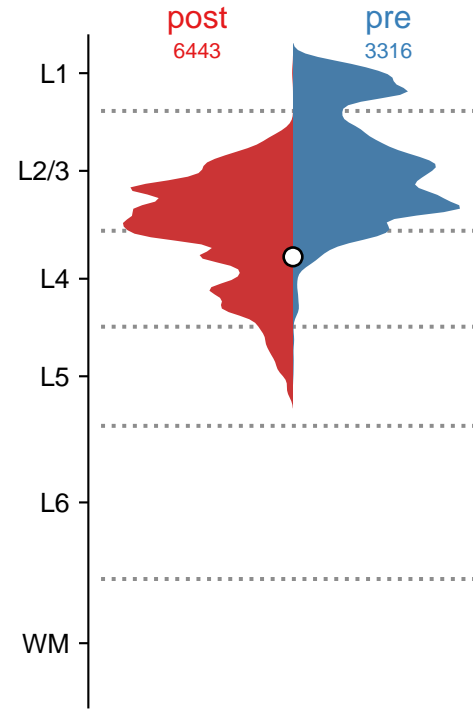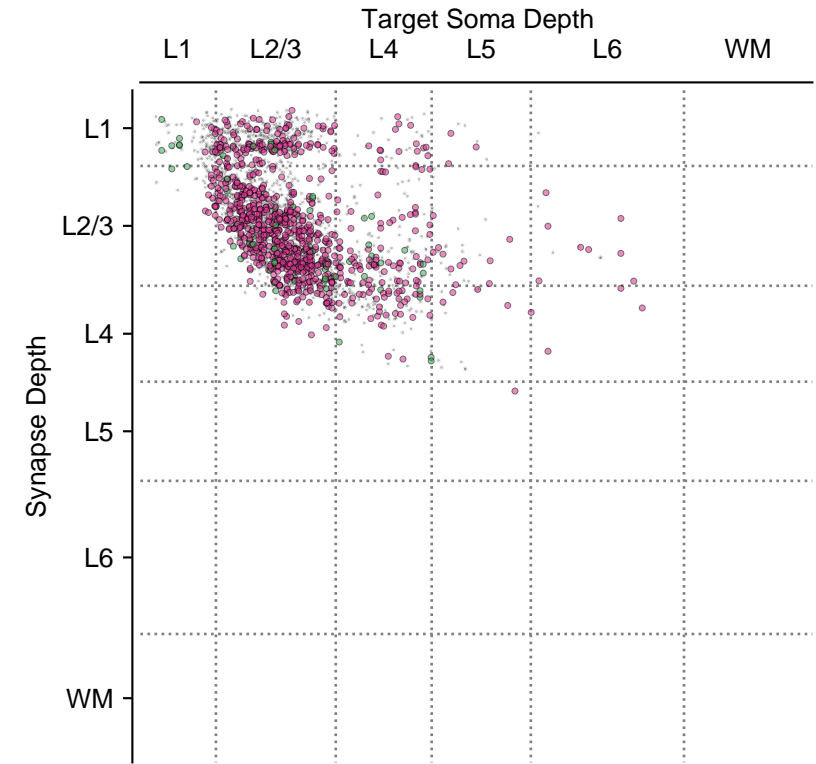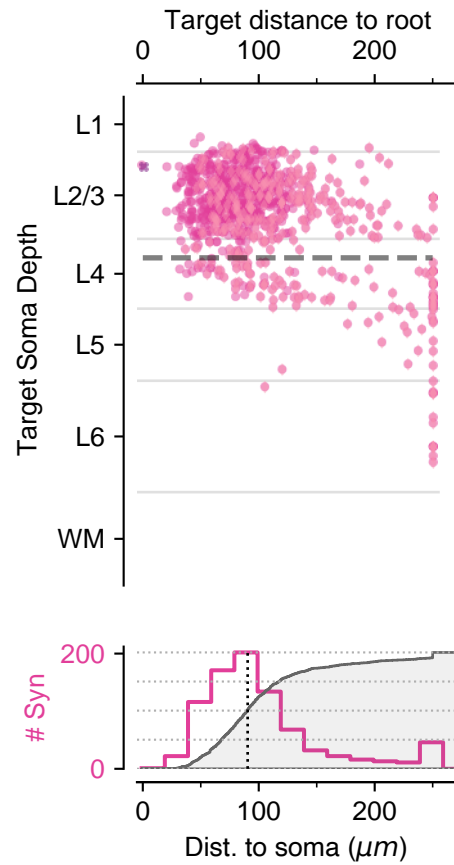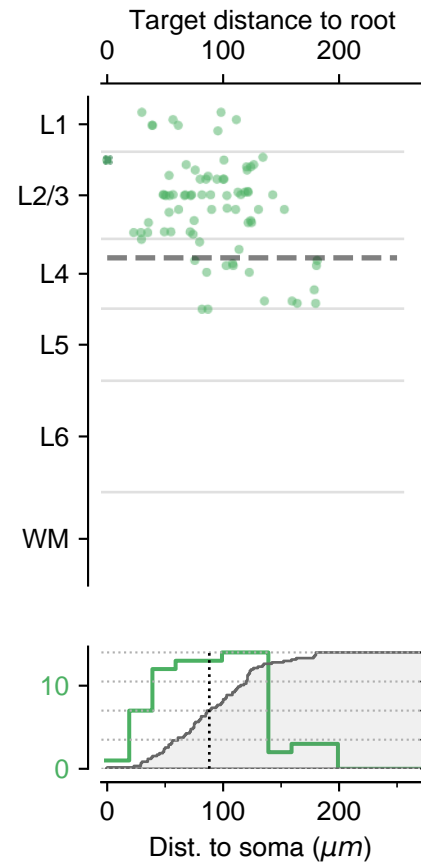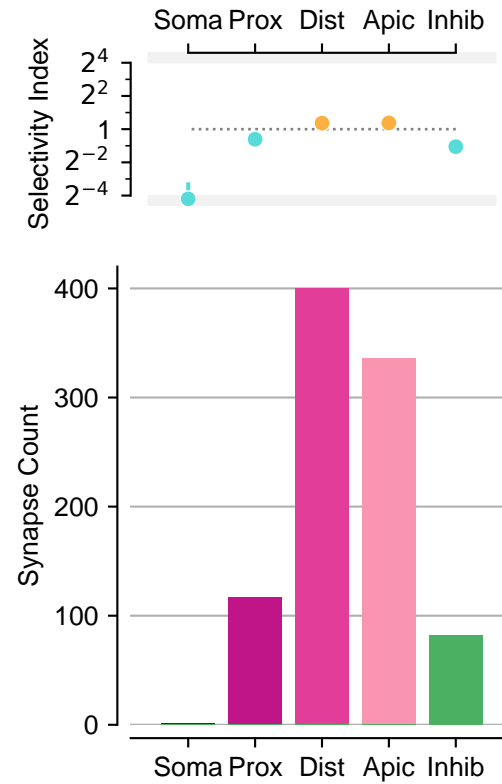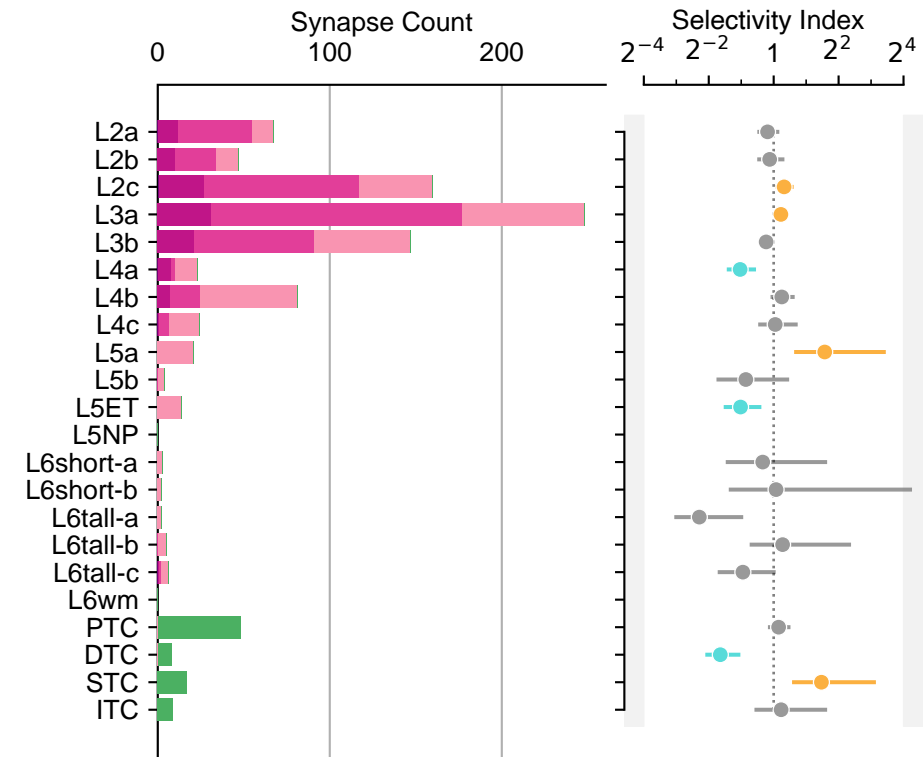

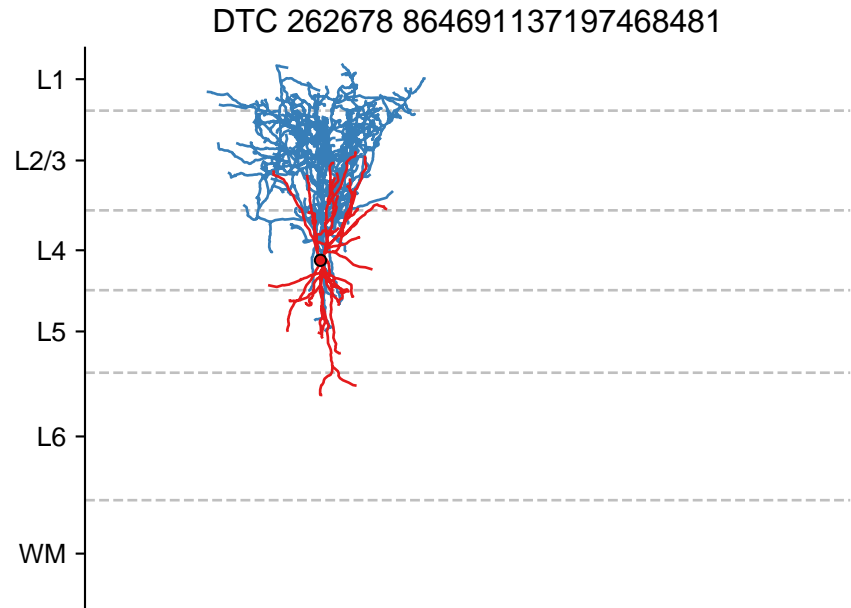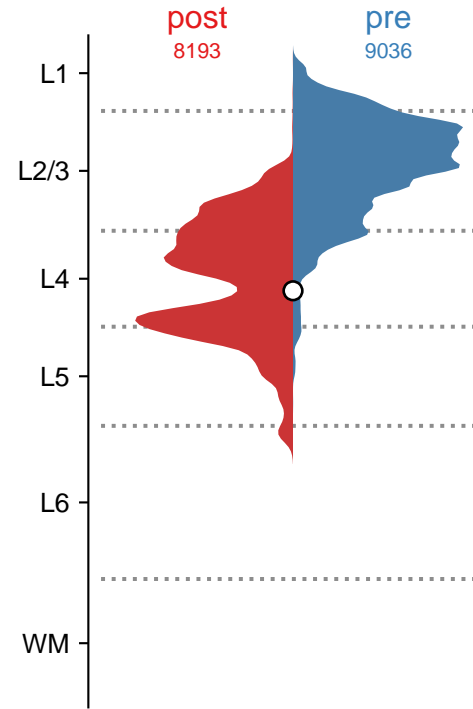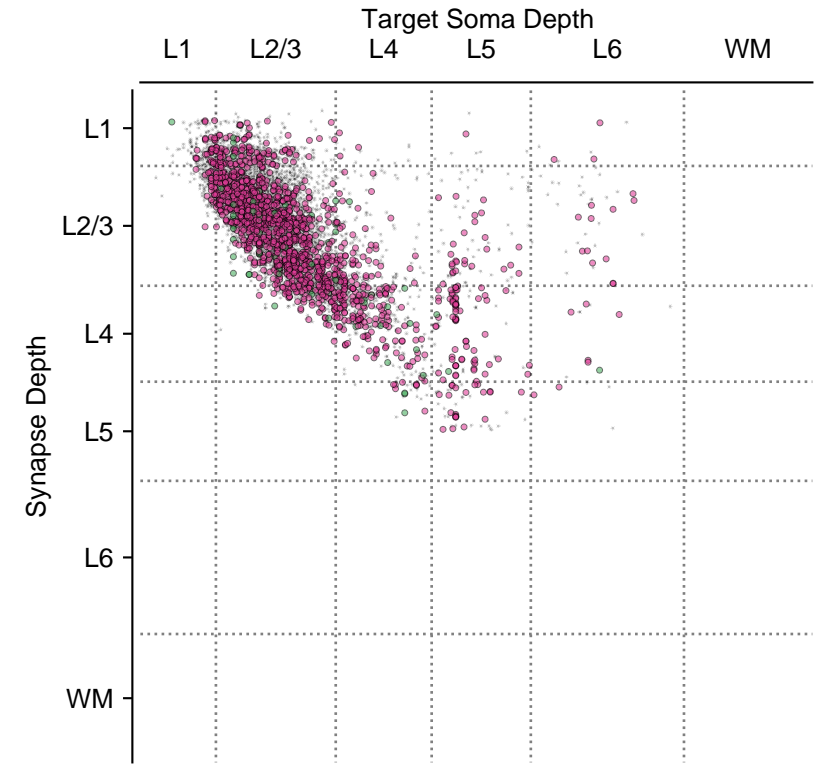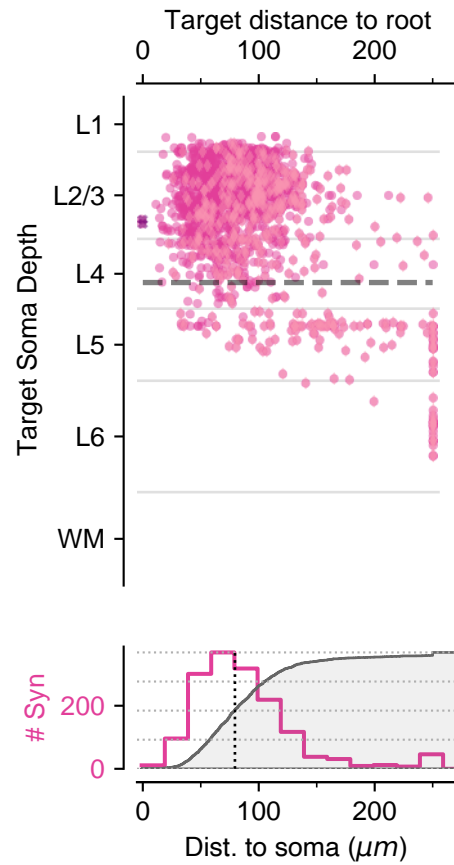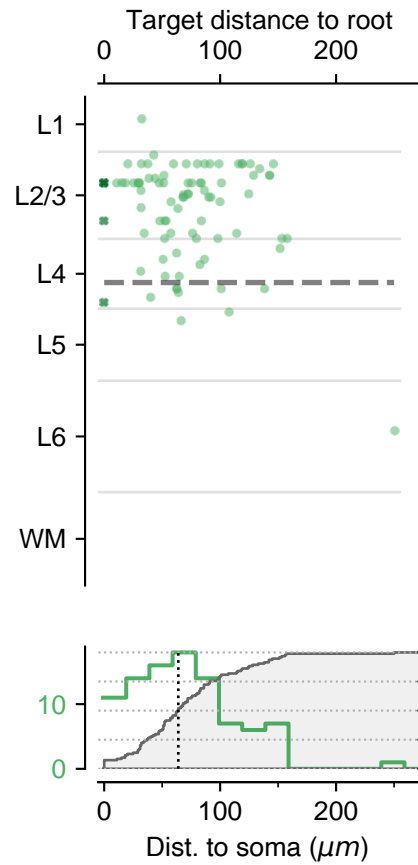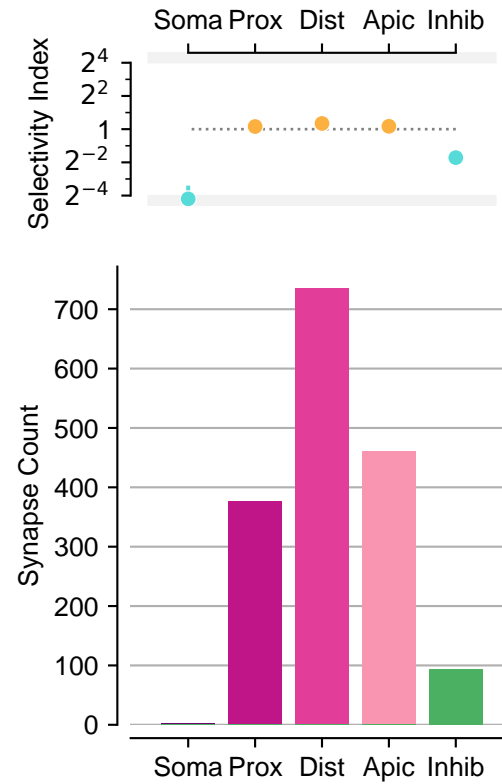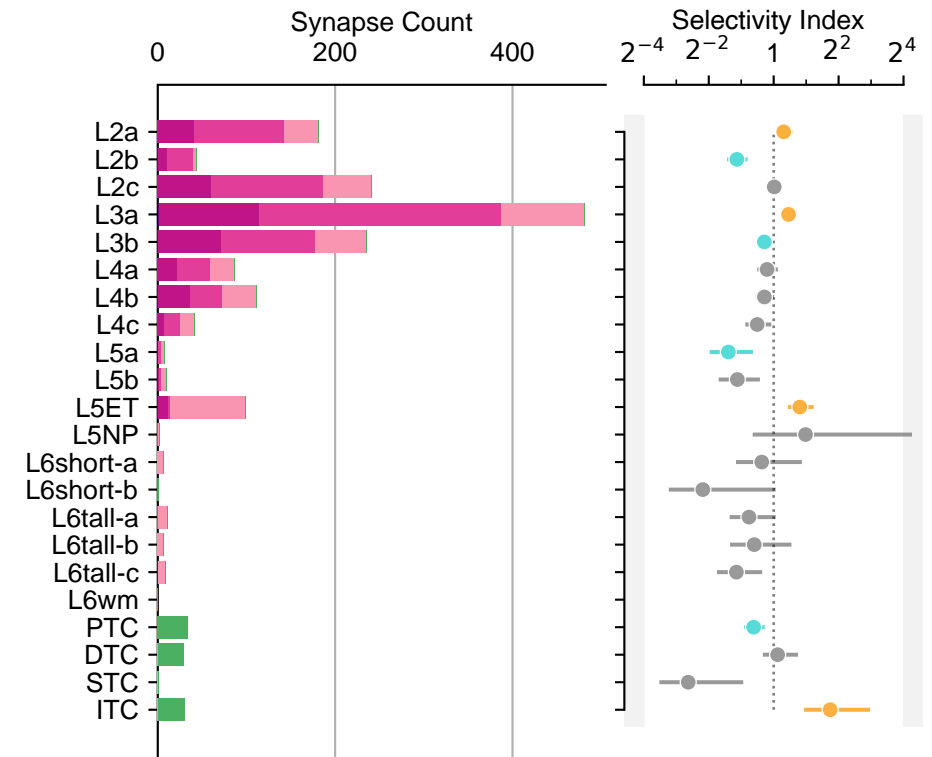

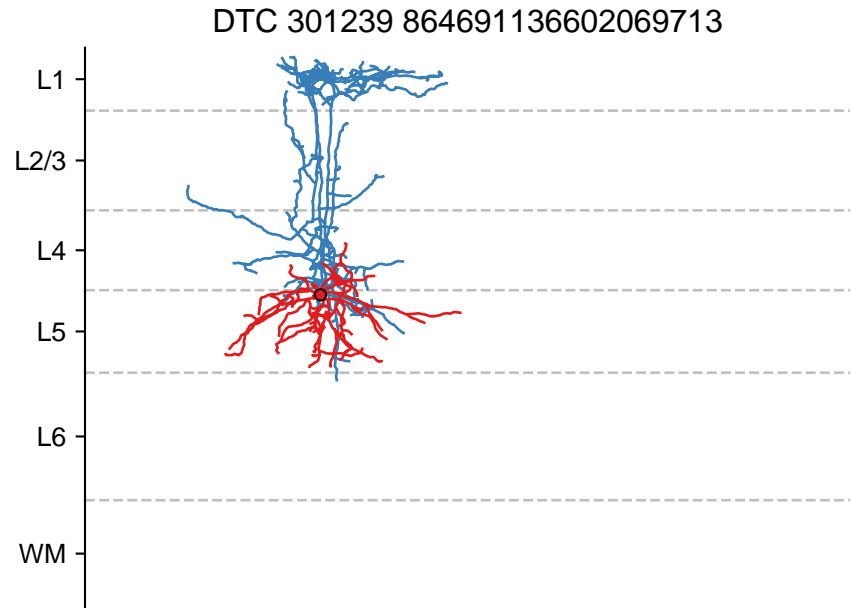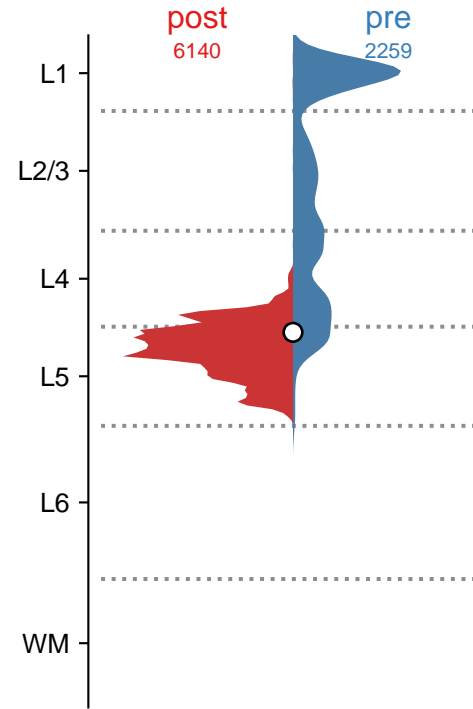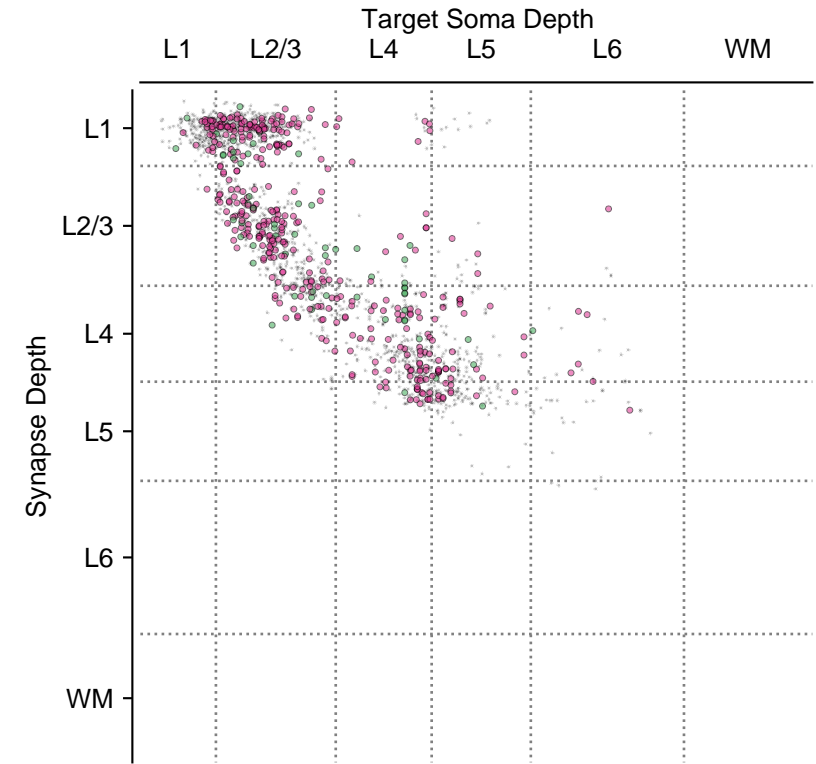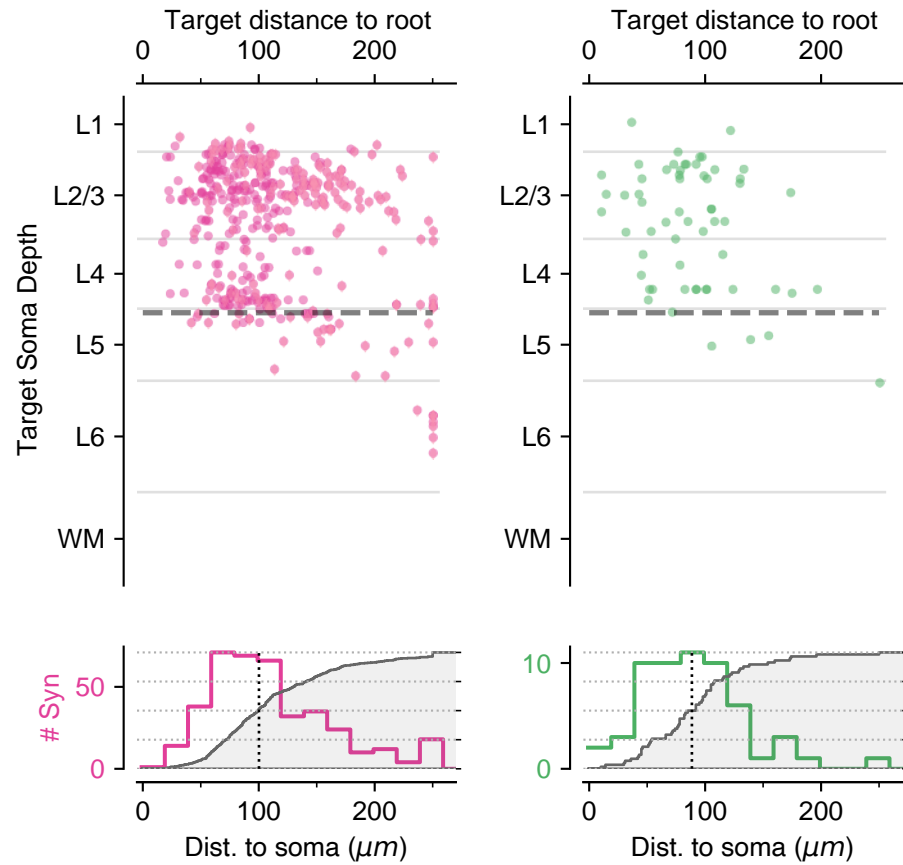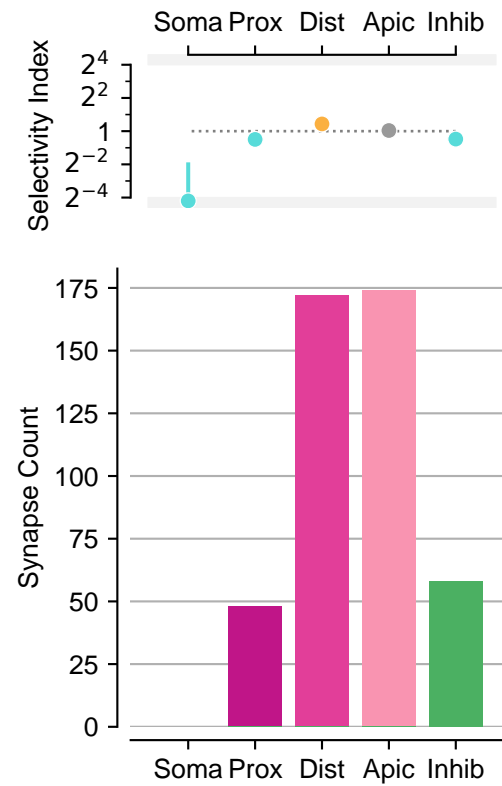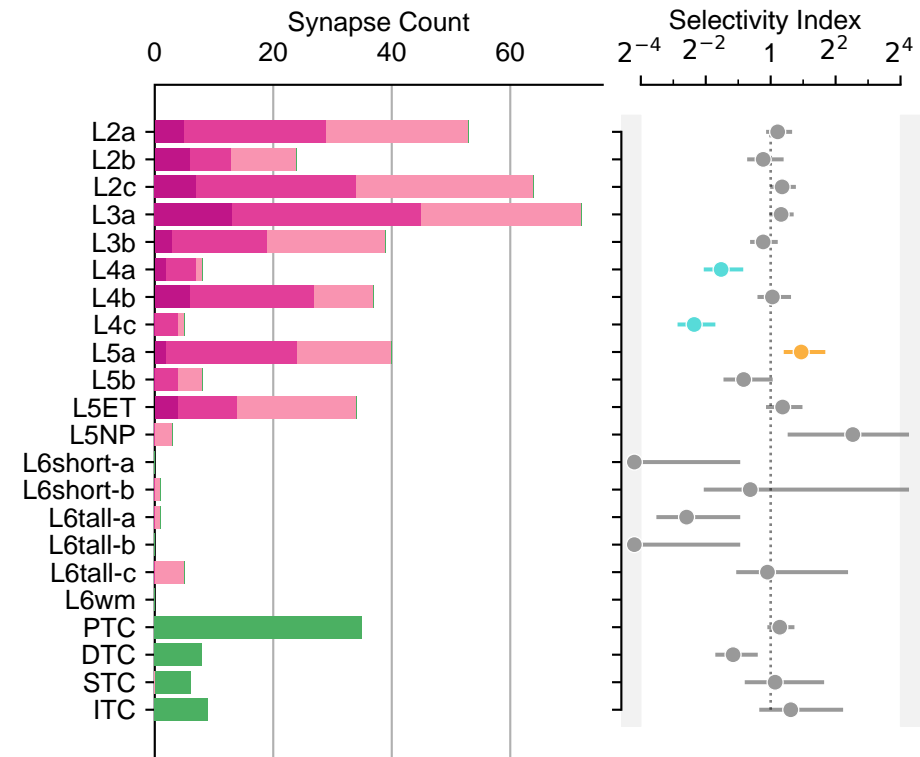

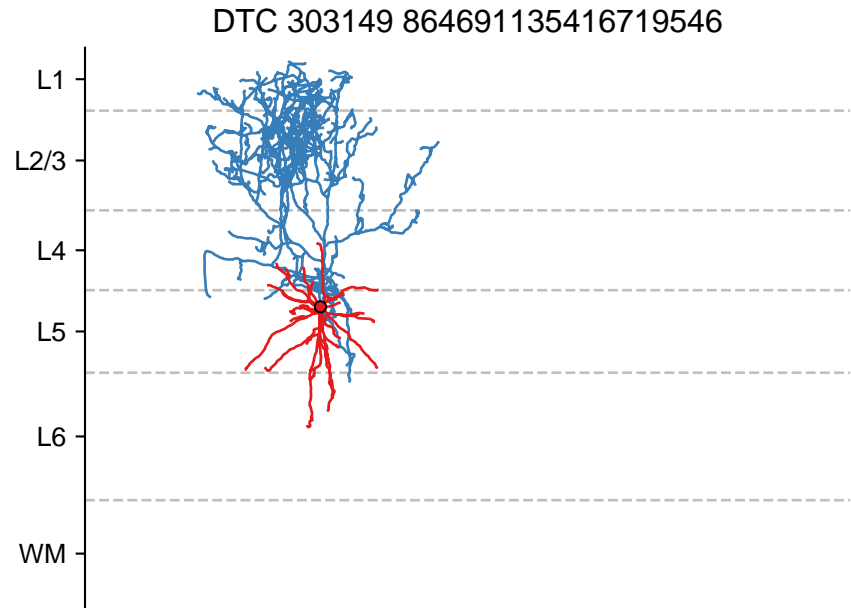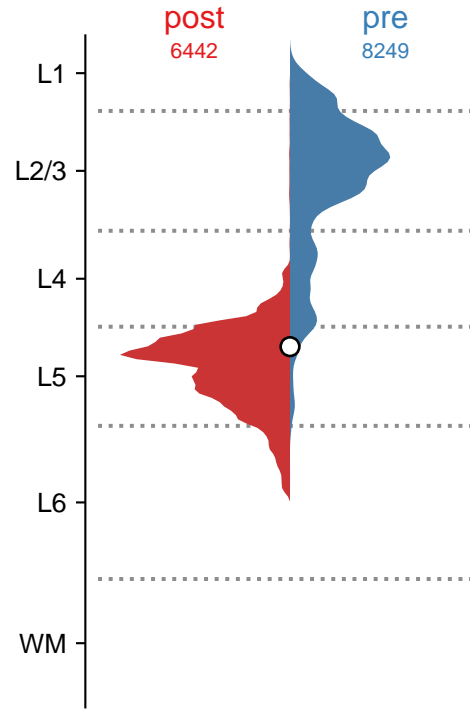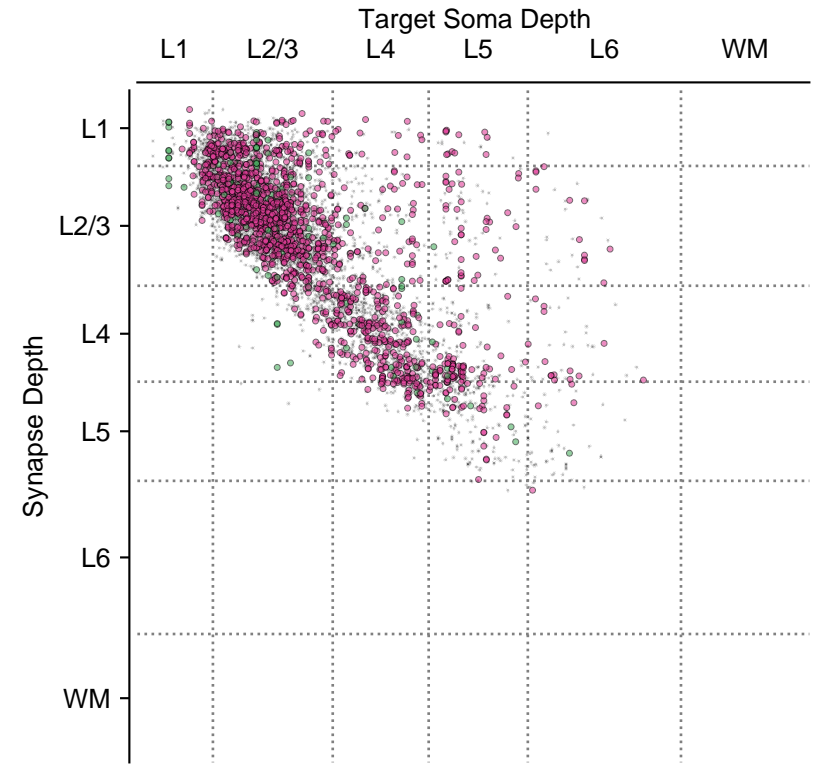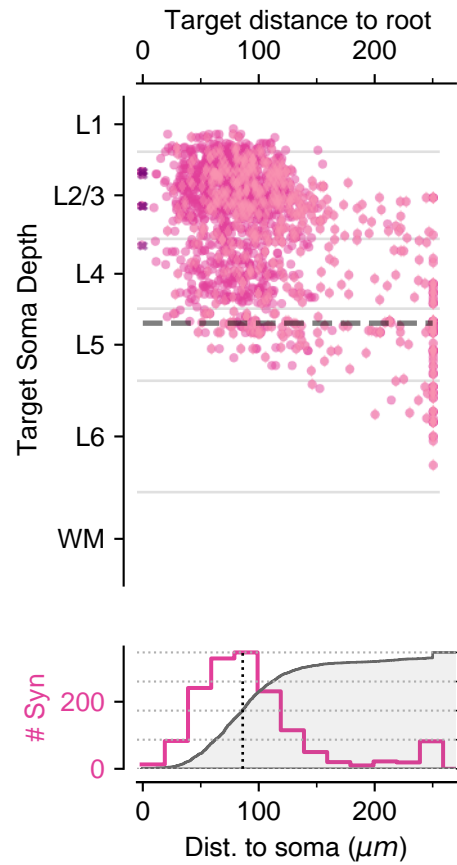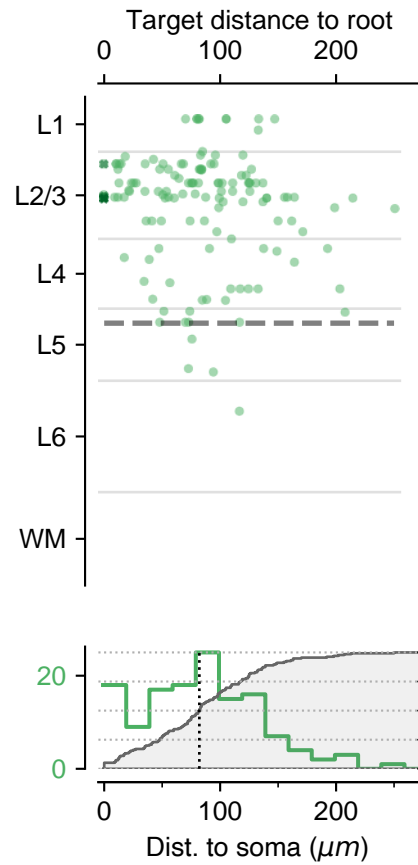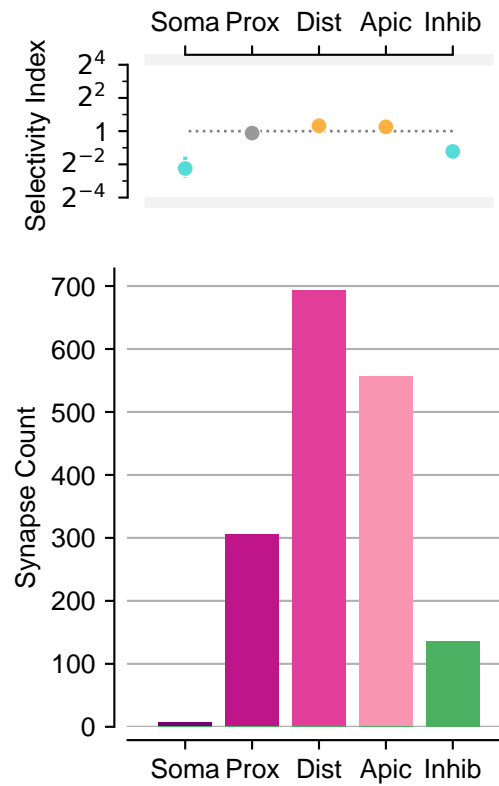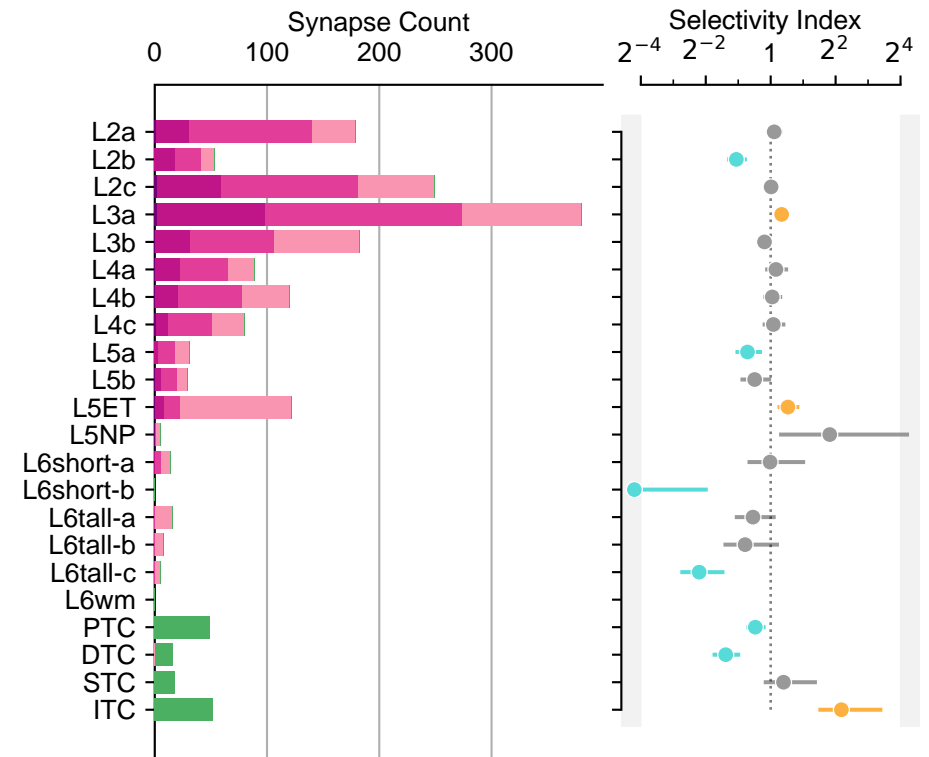

# Motif Group 4

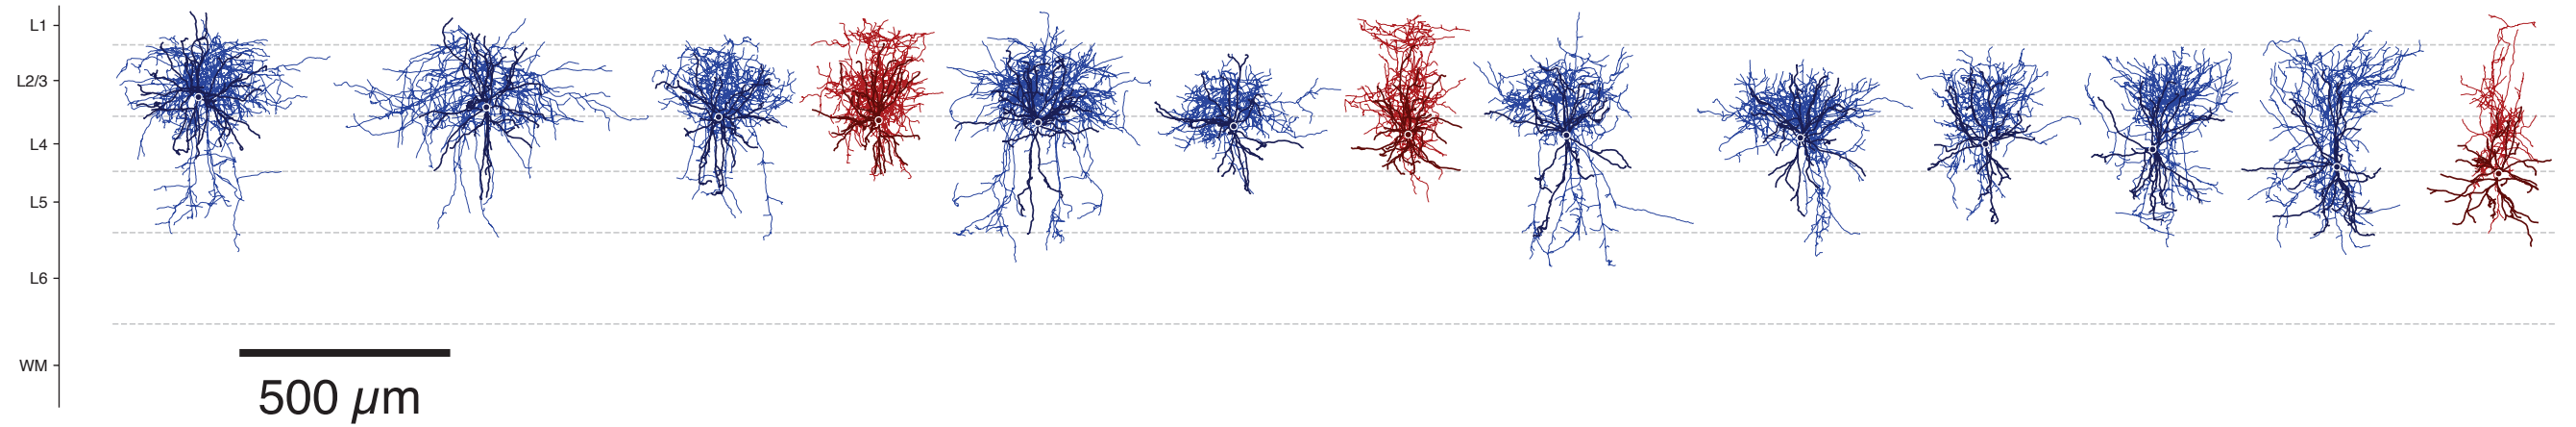

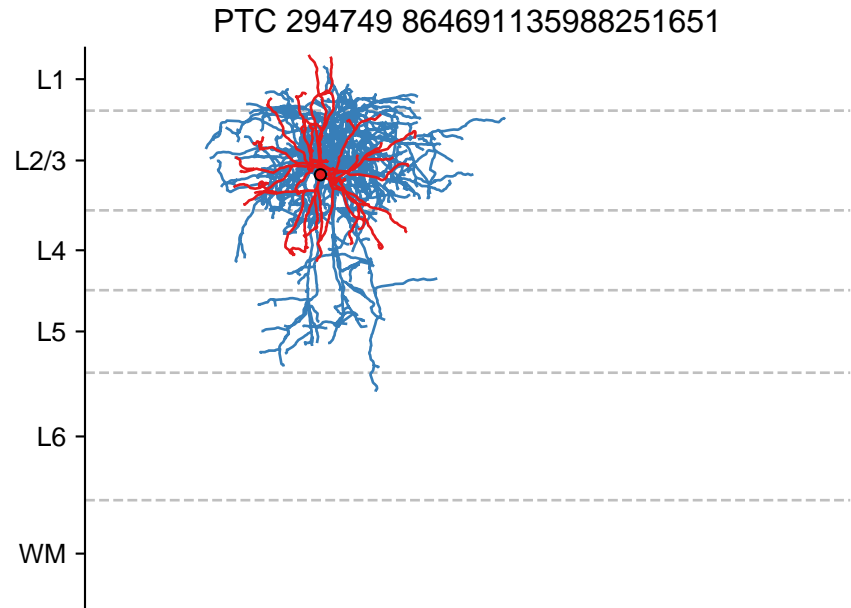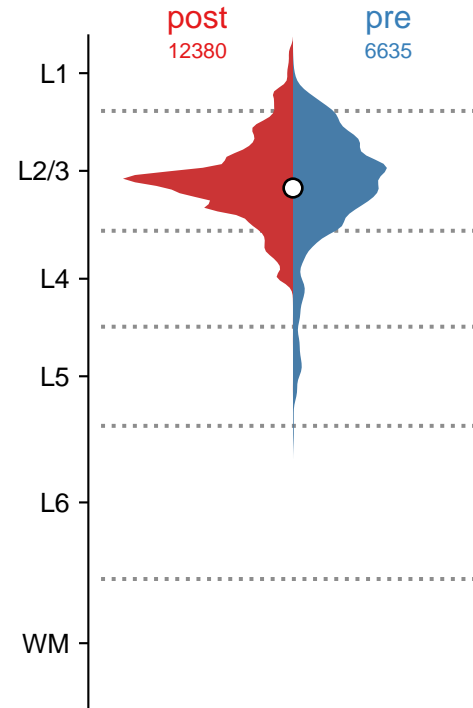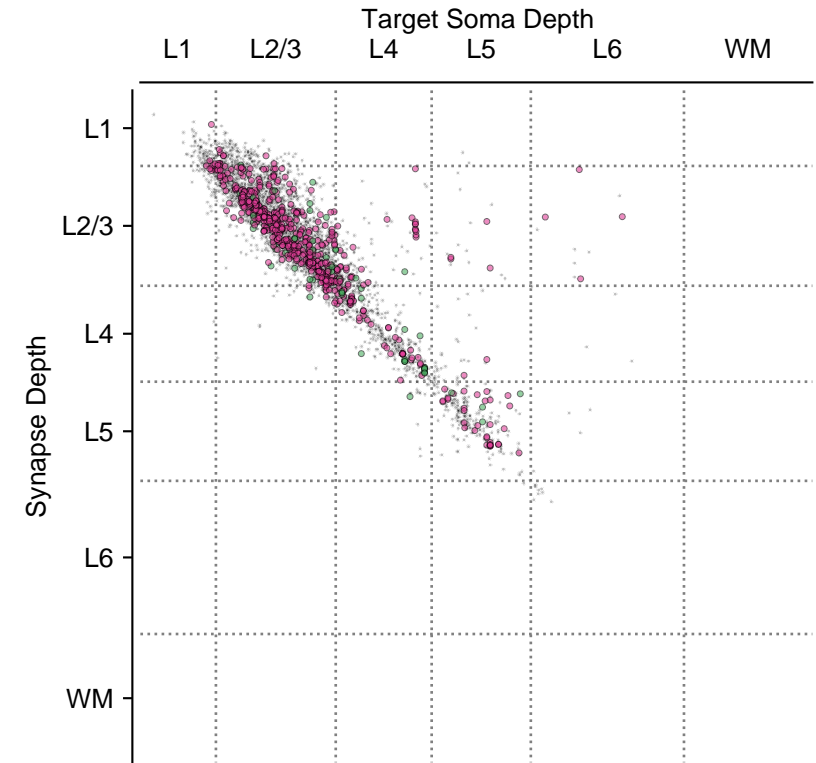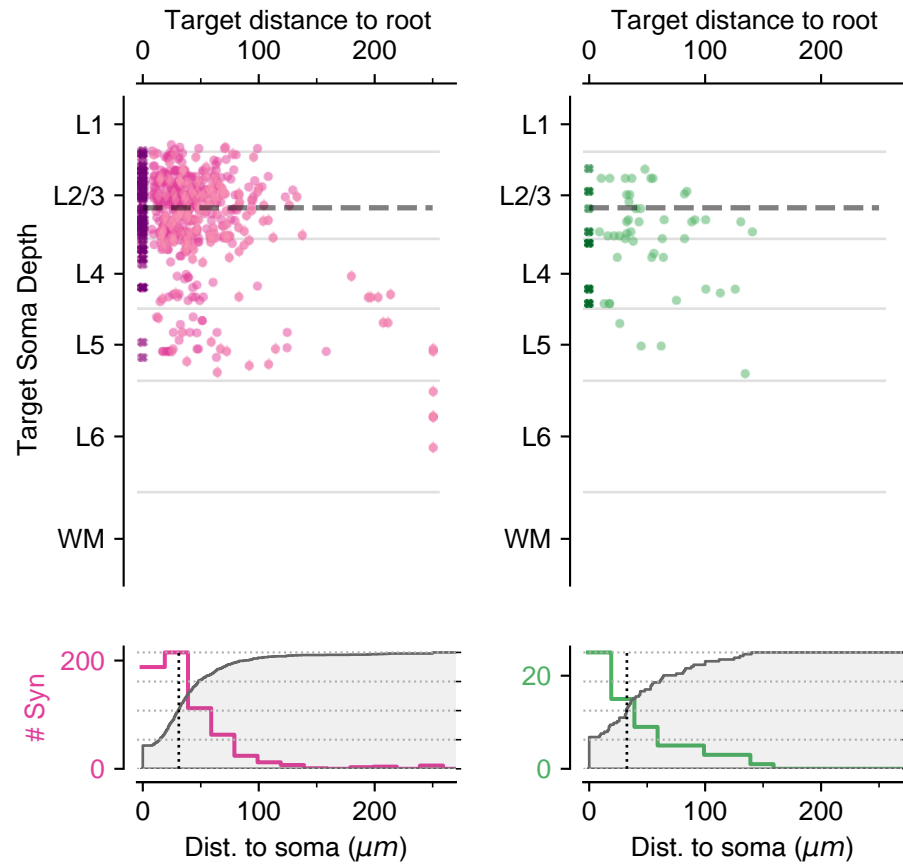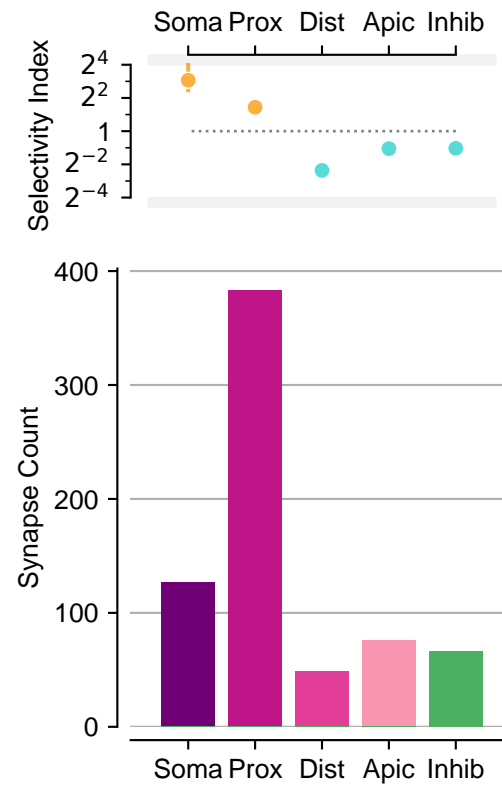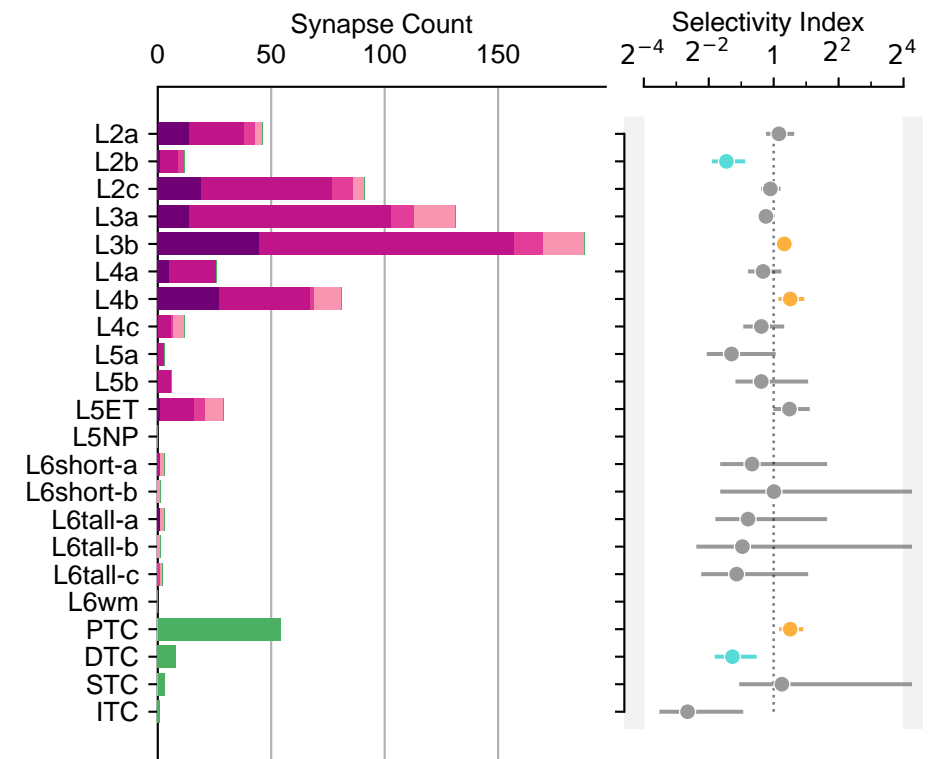

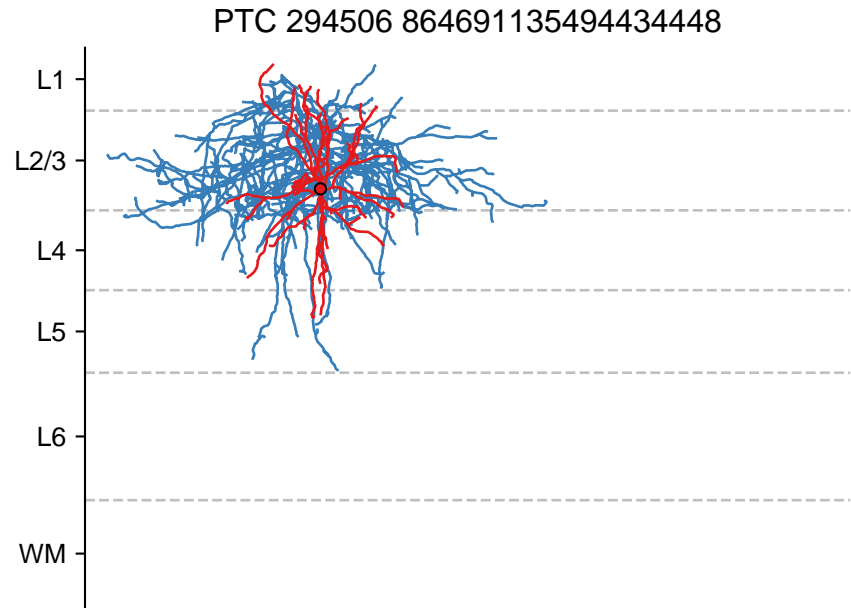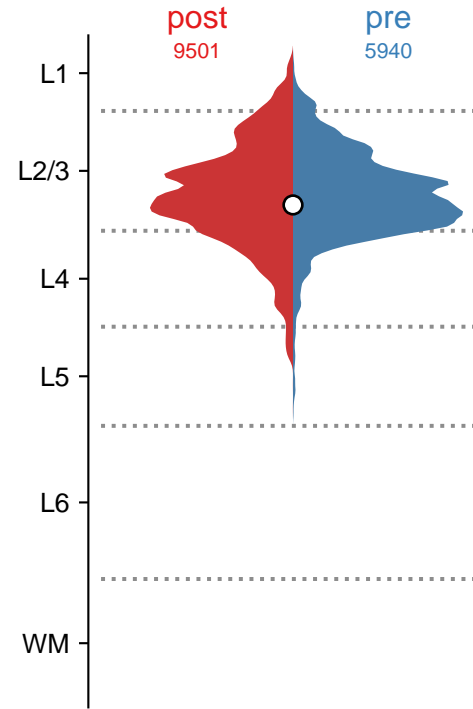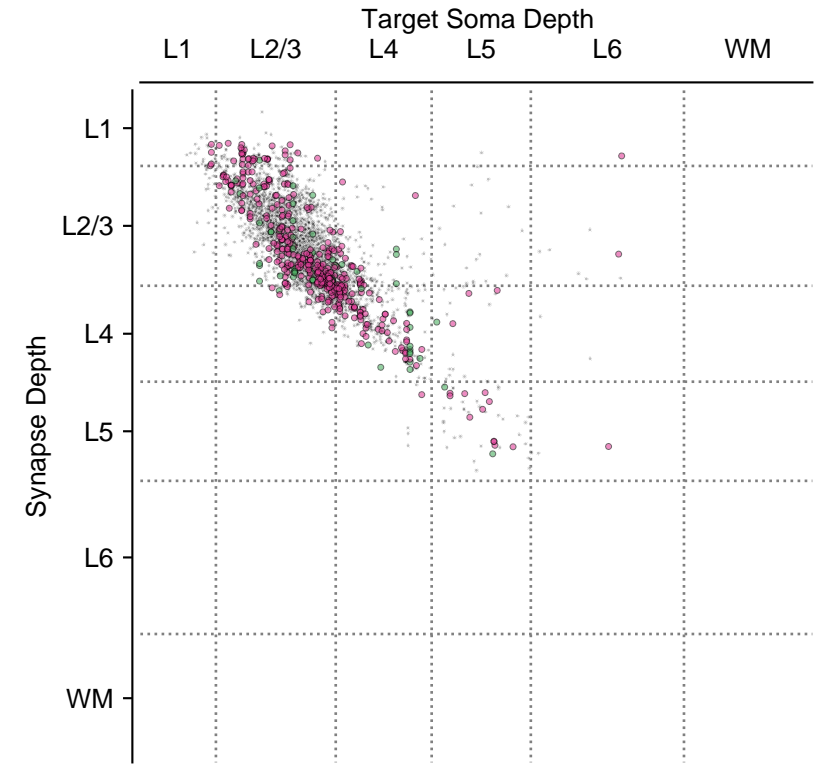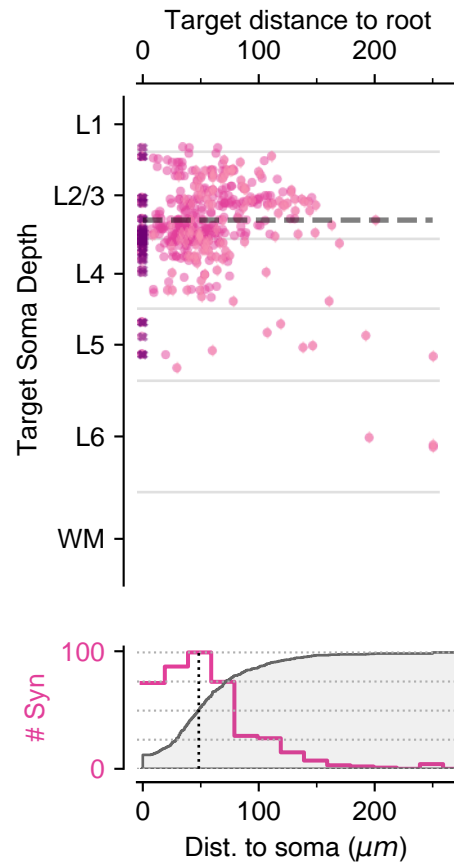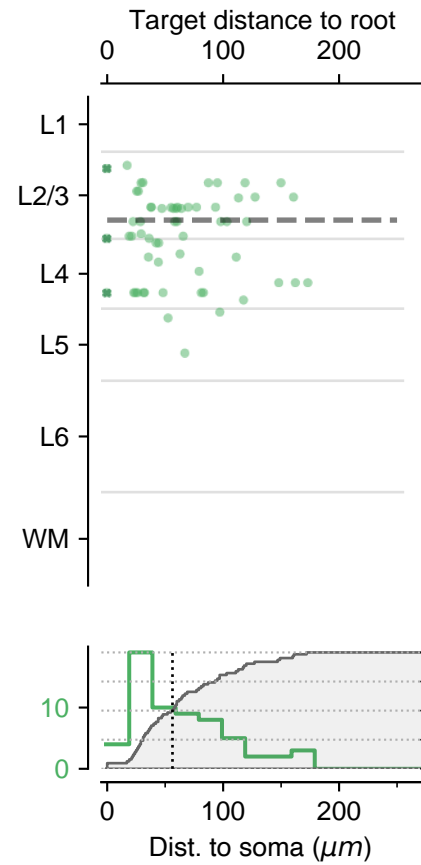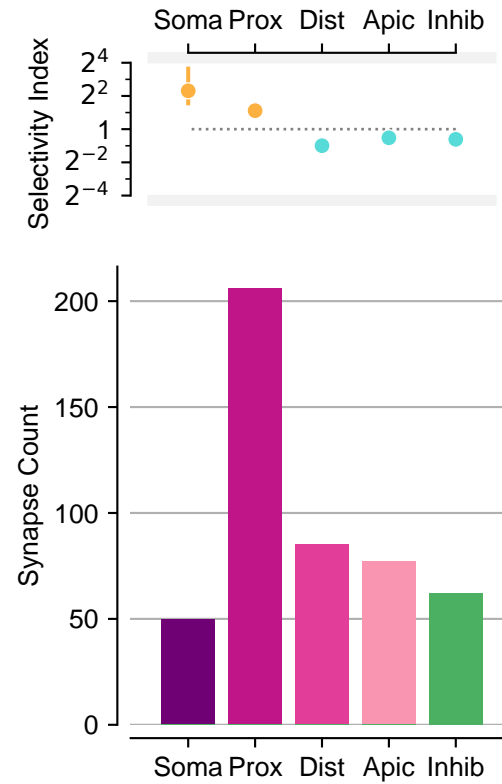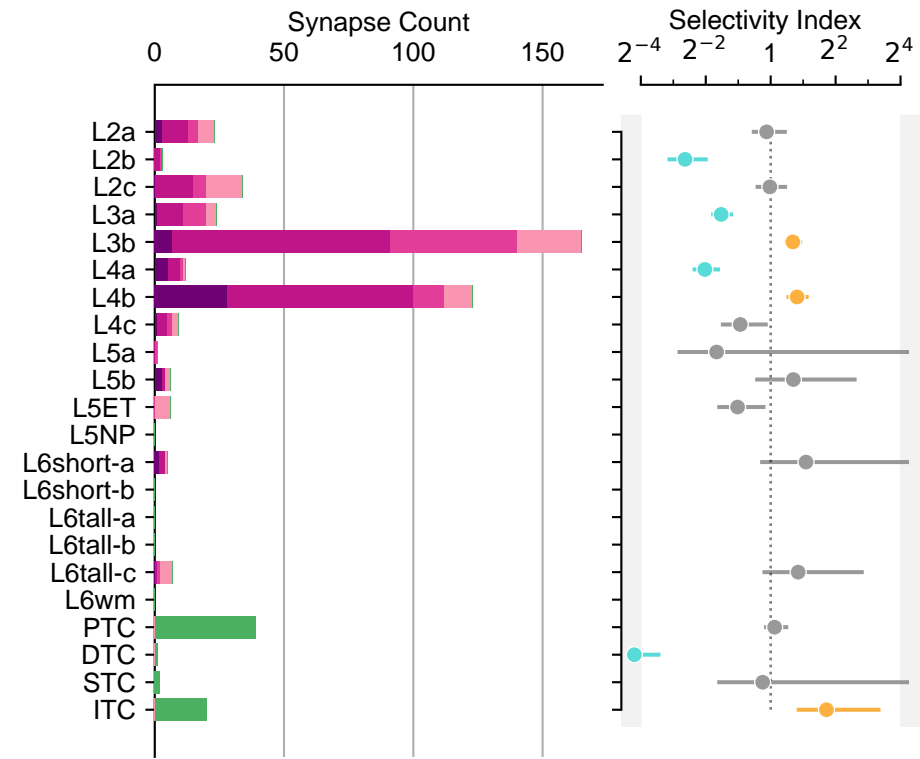



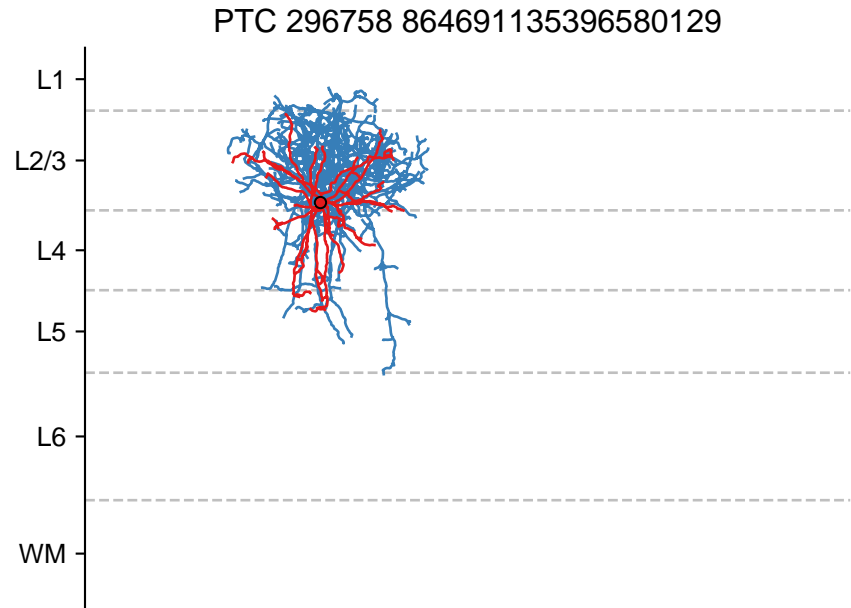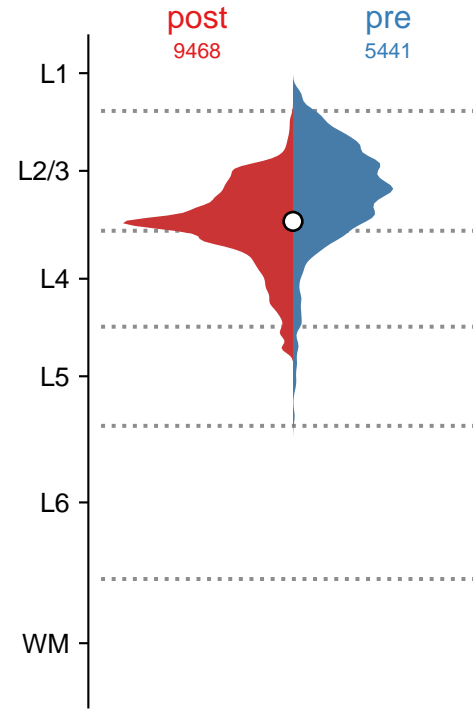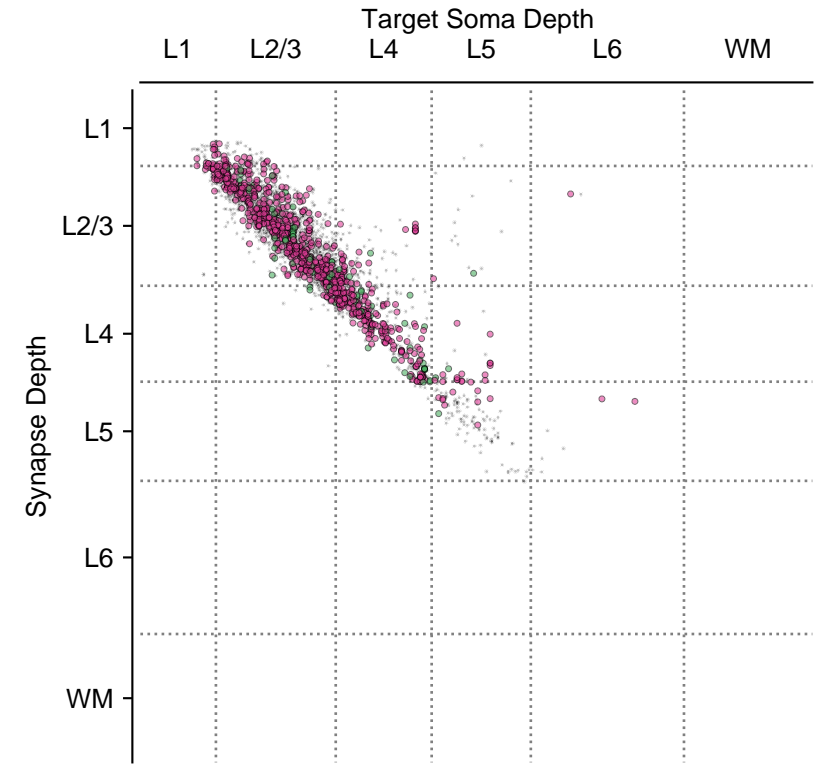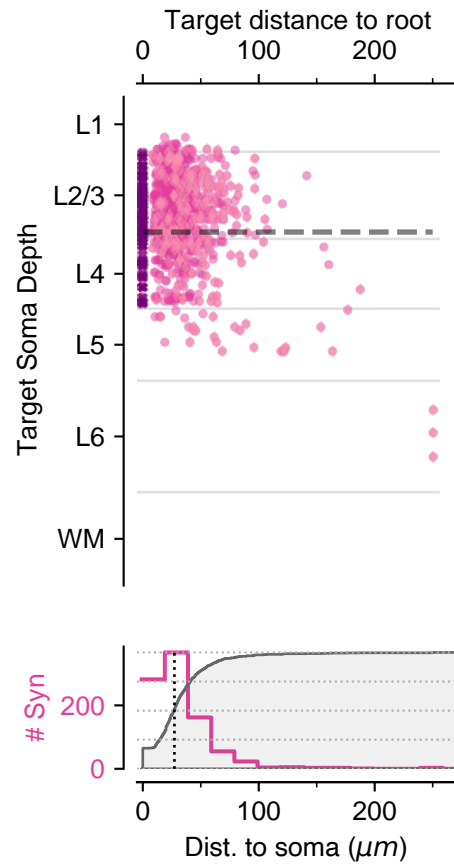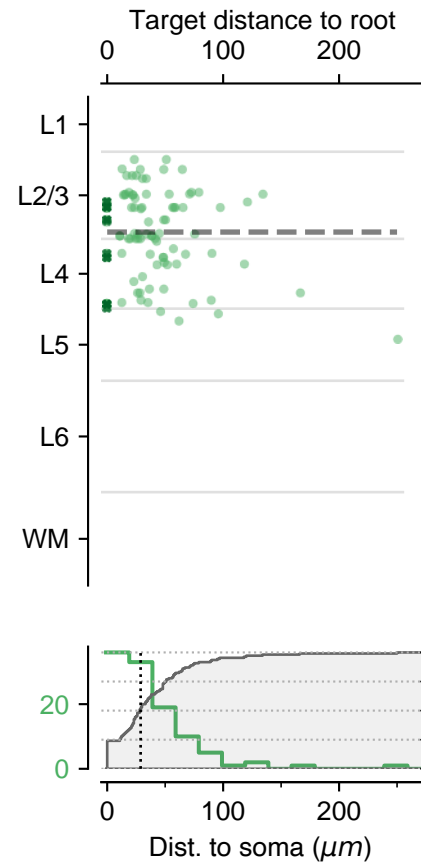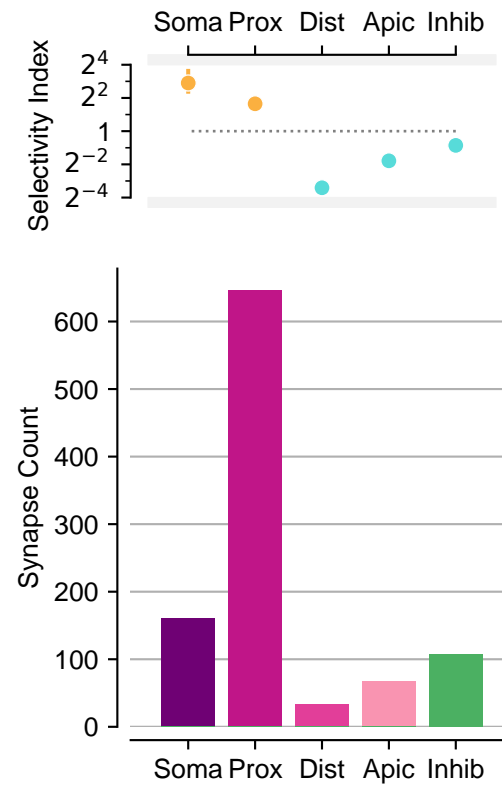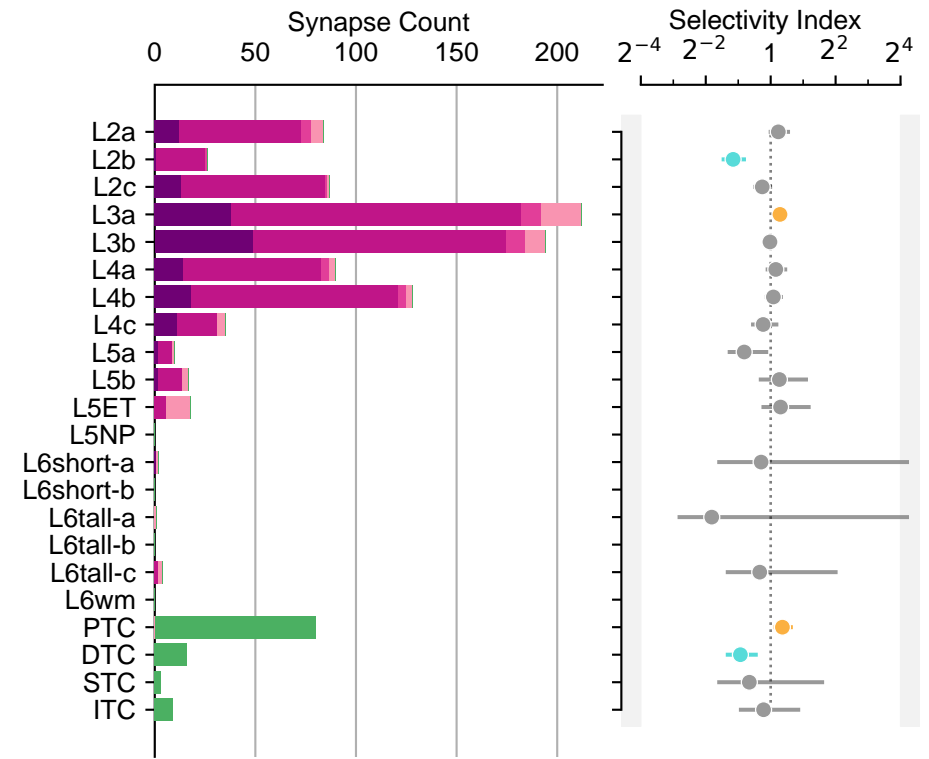

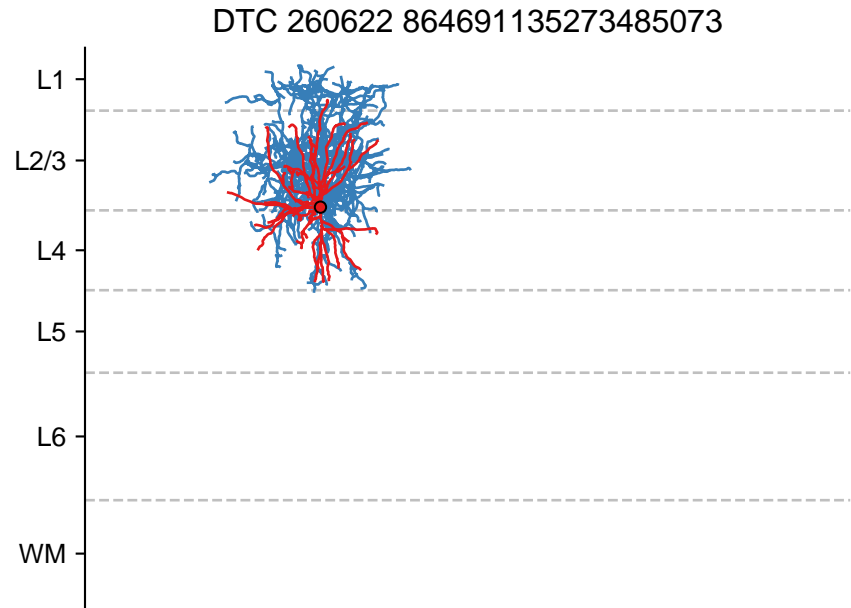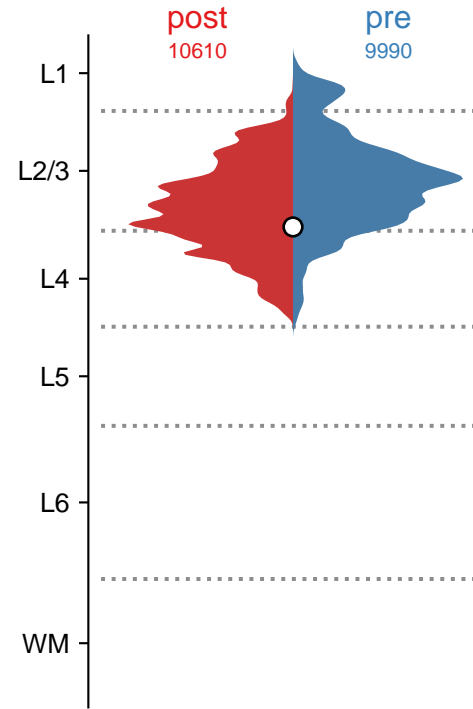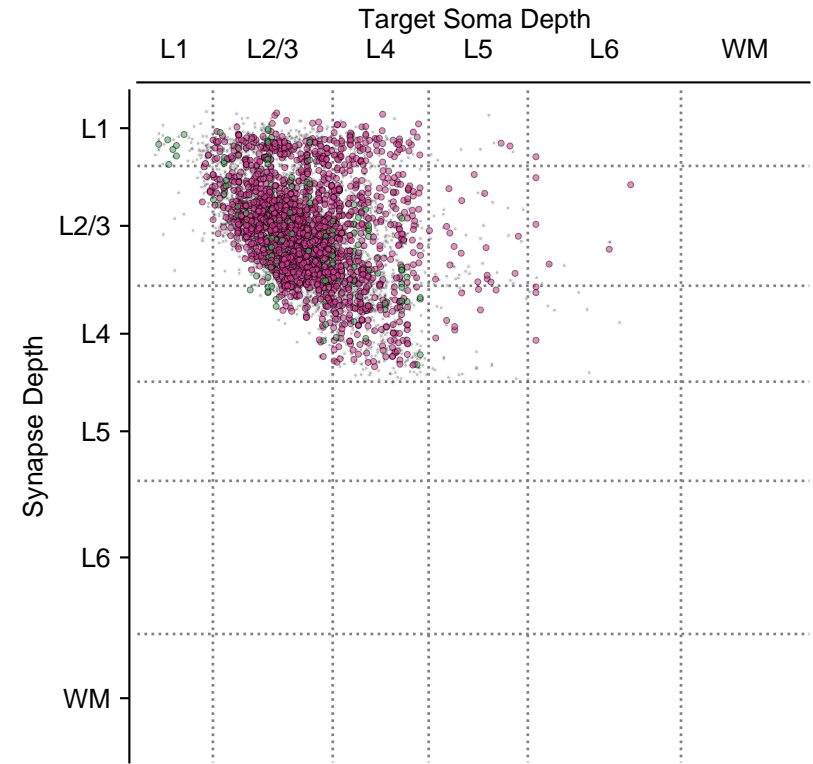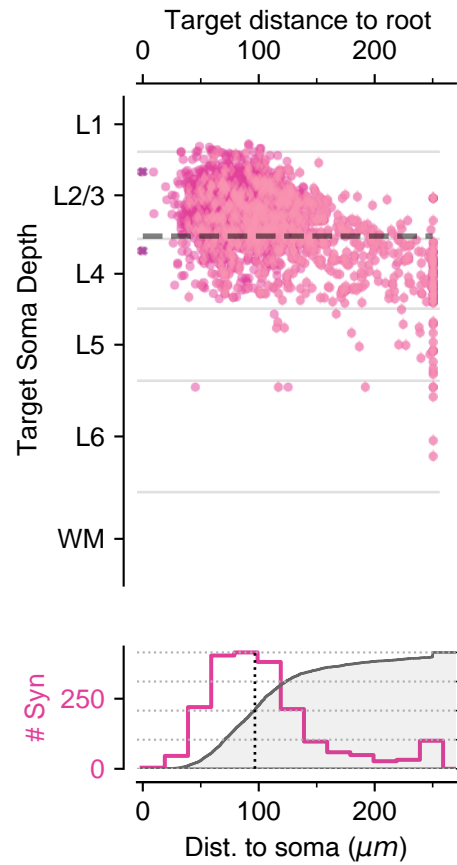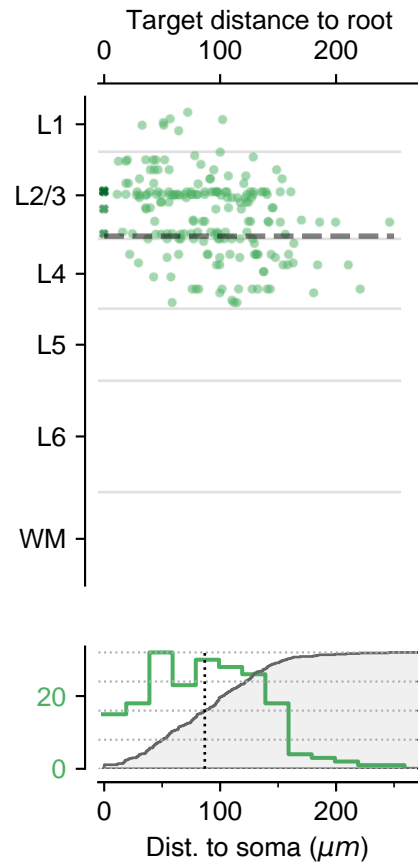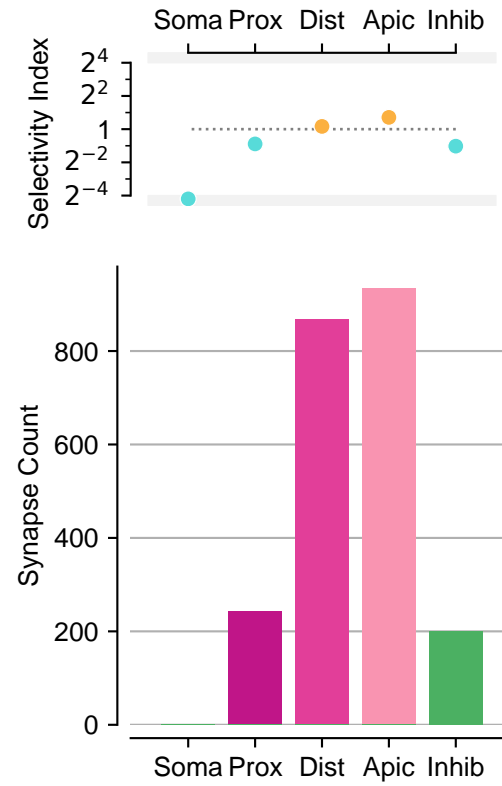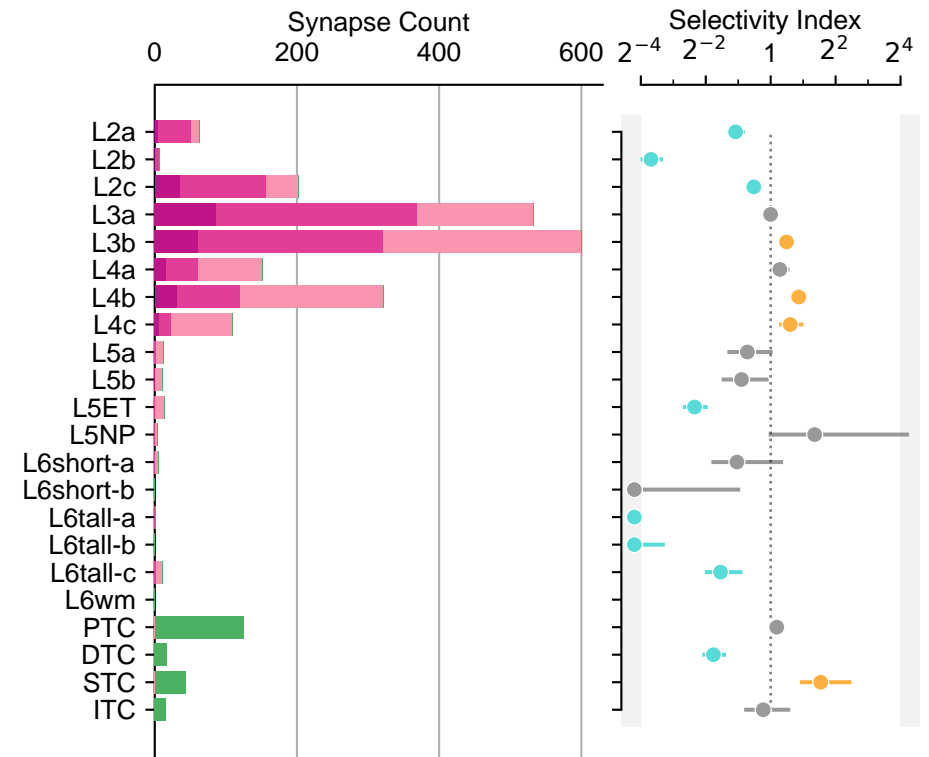

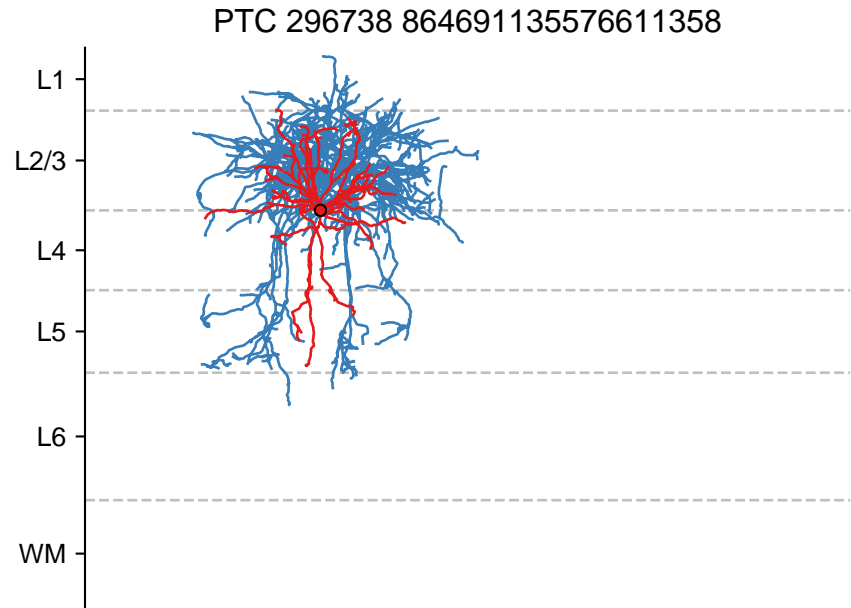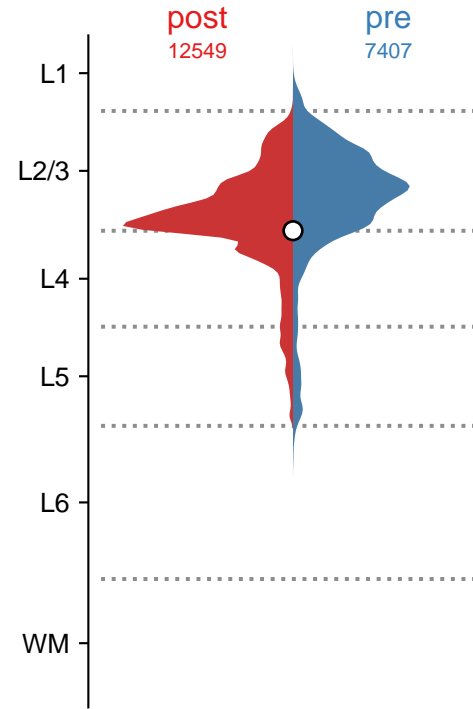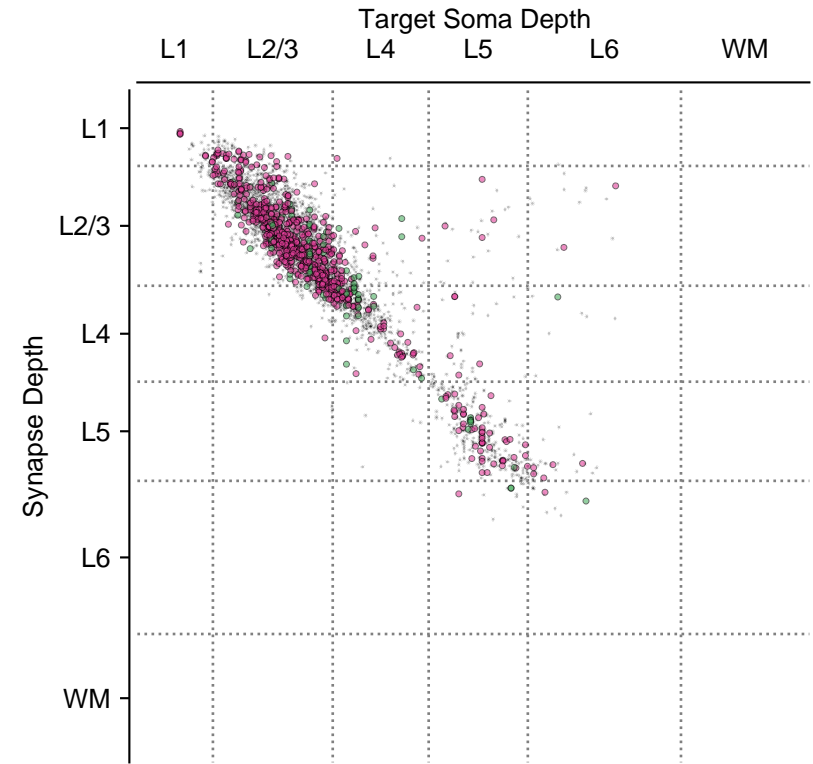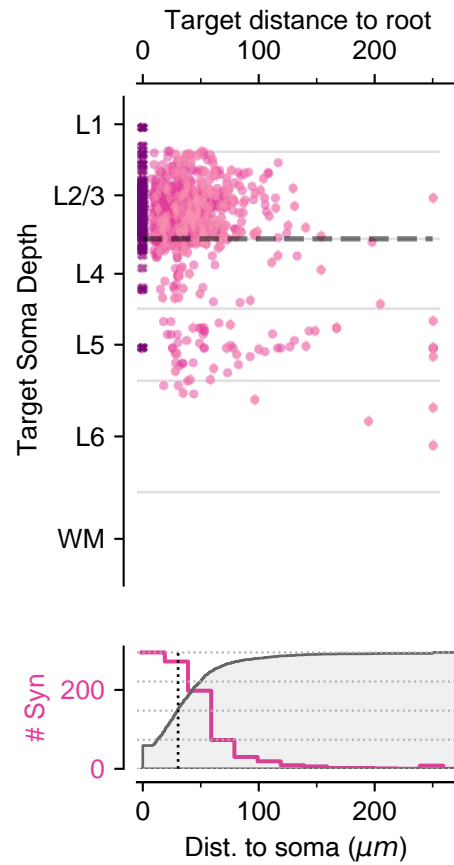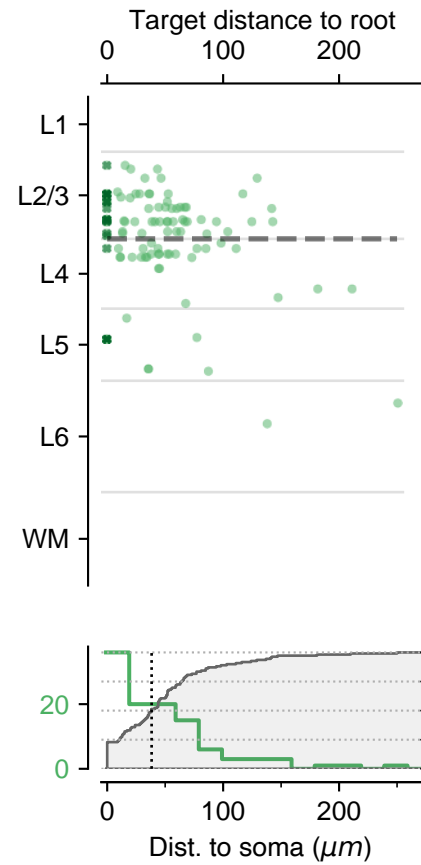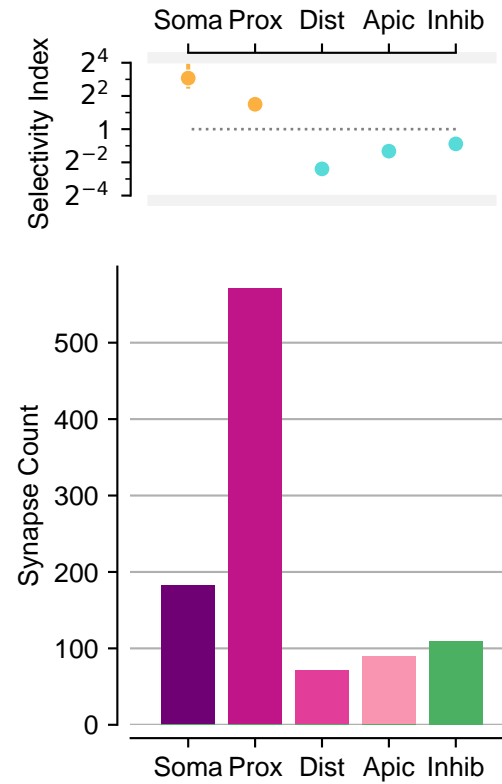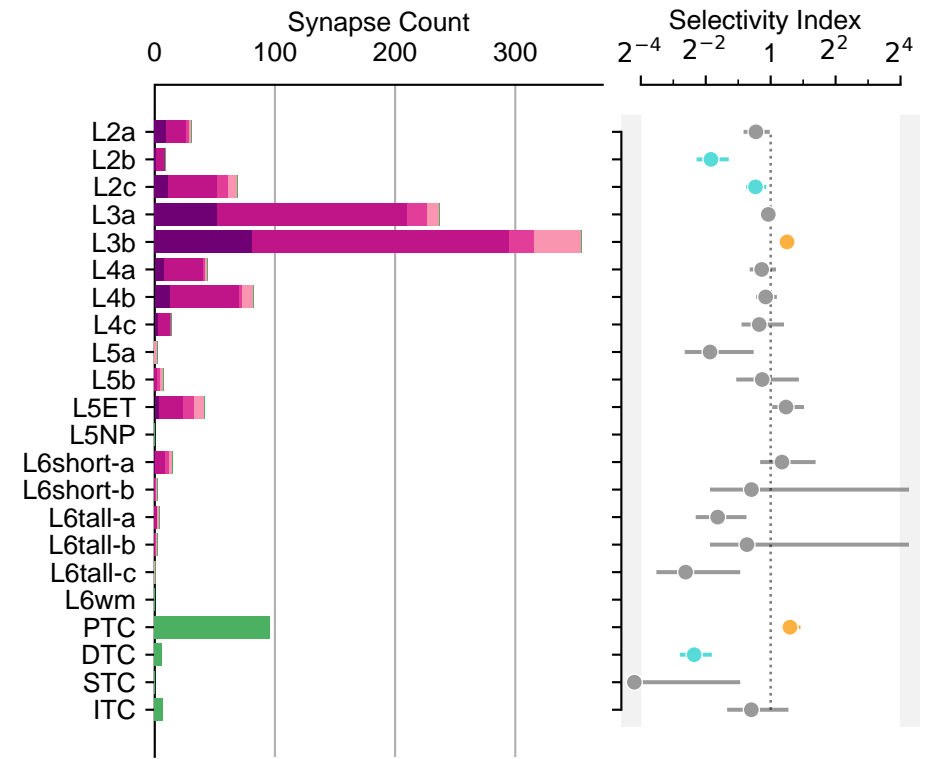

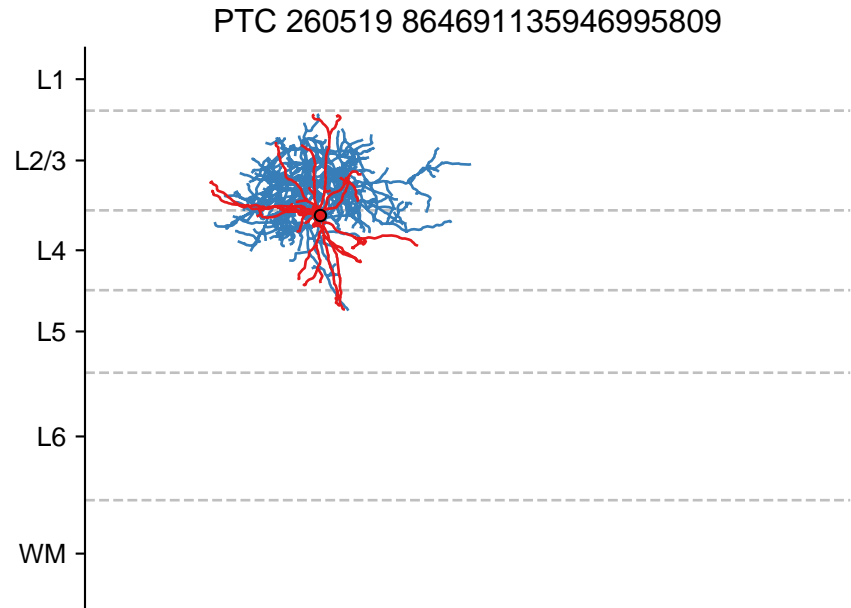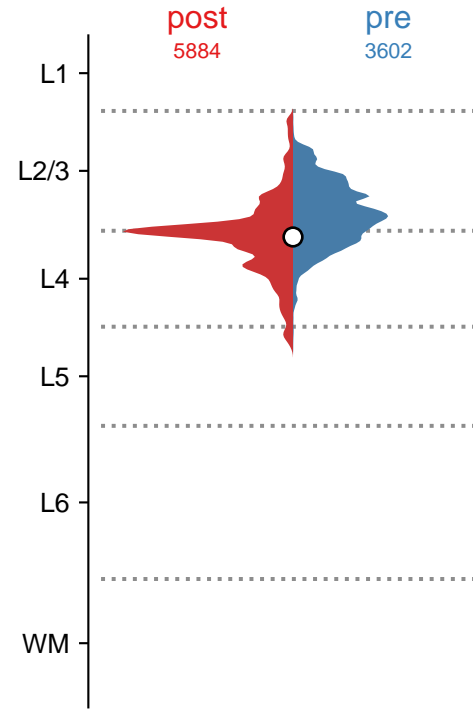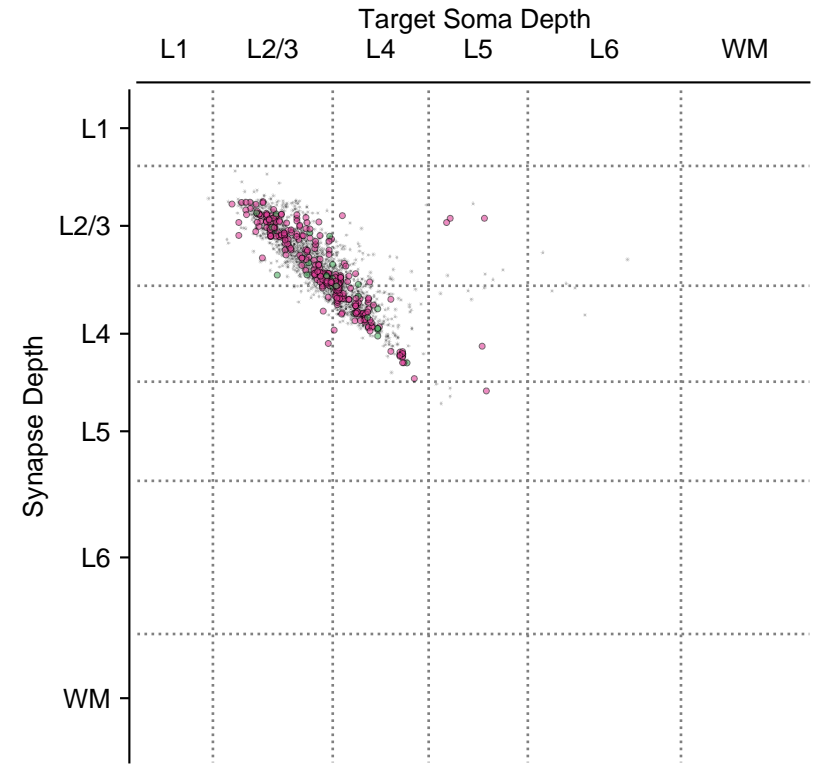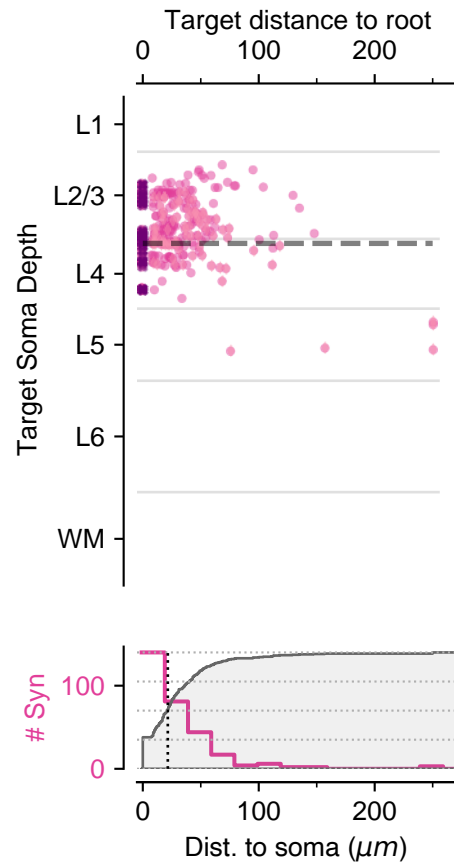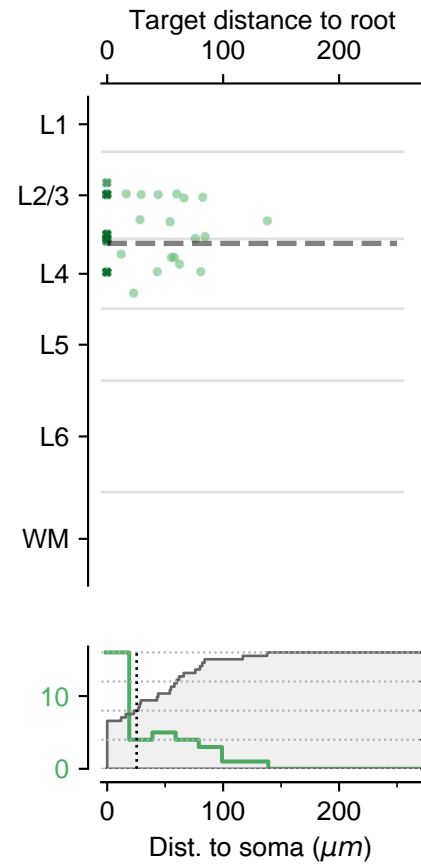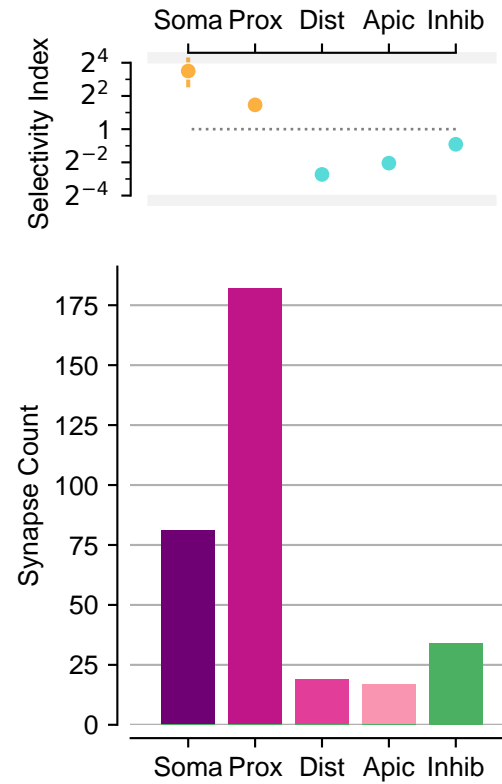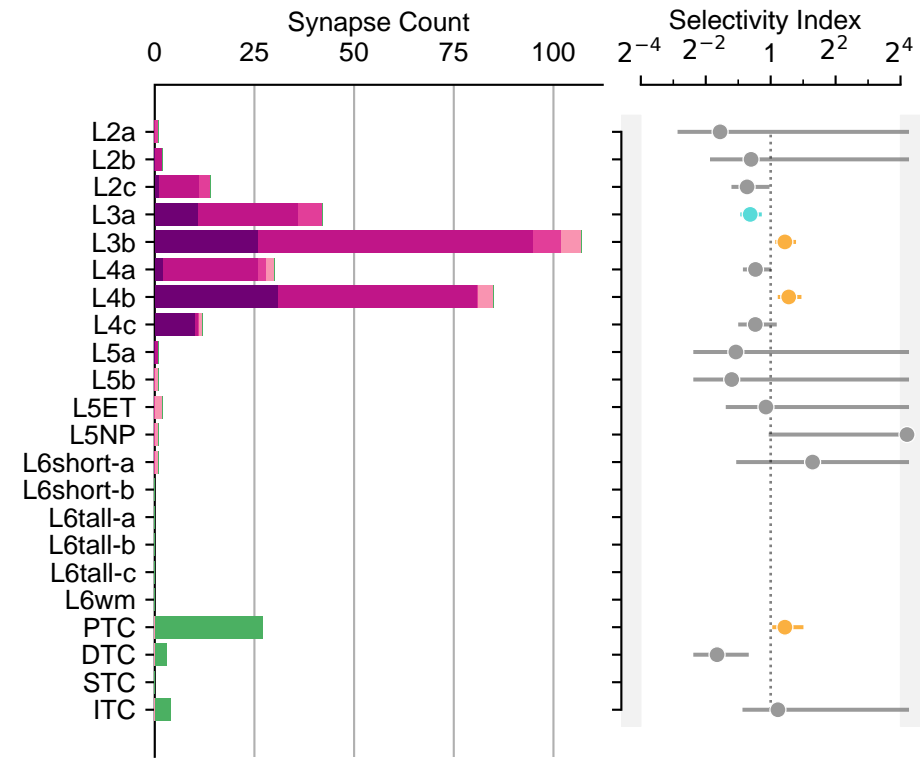

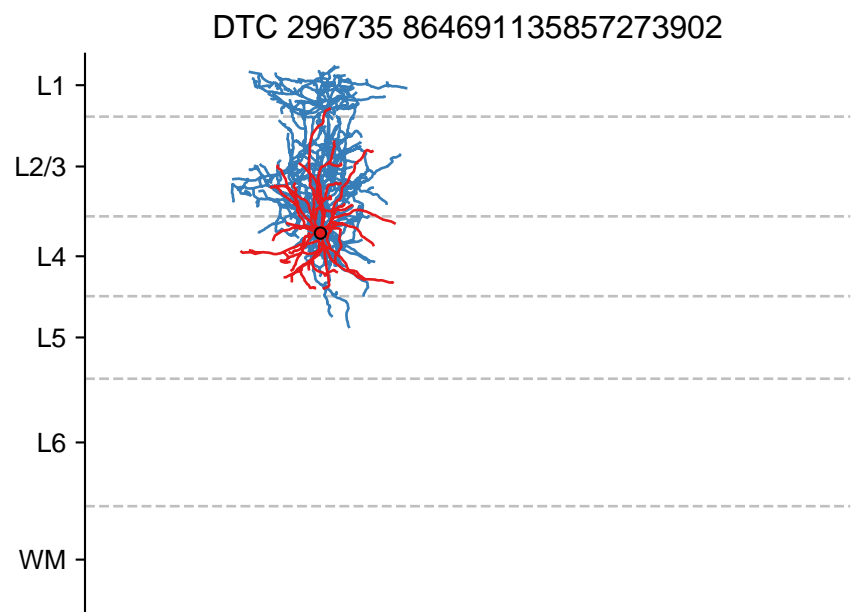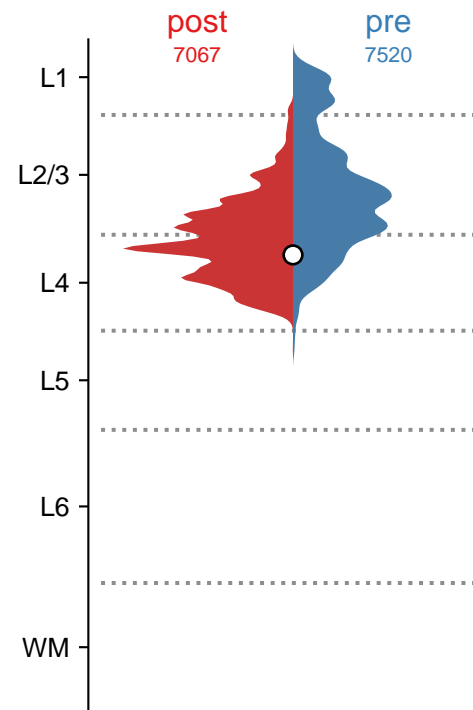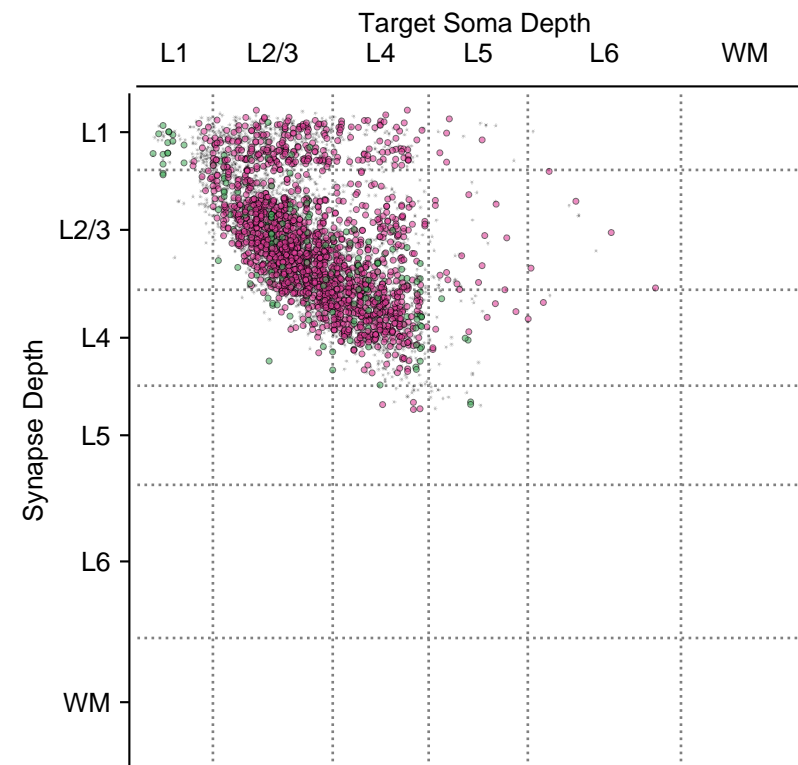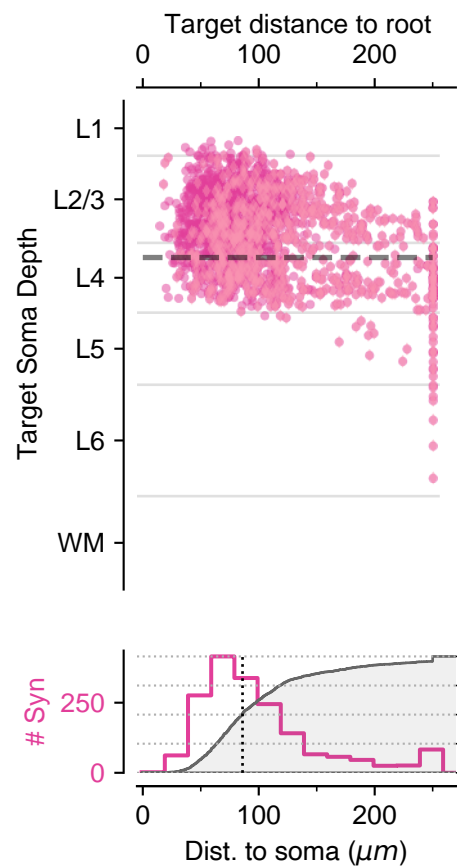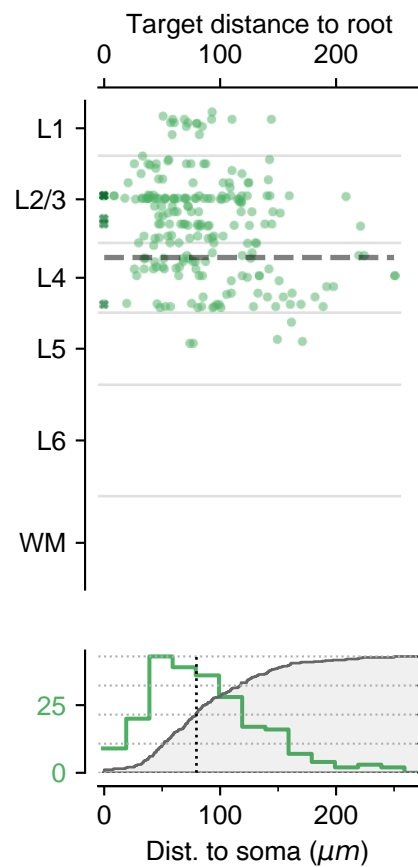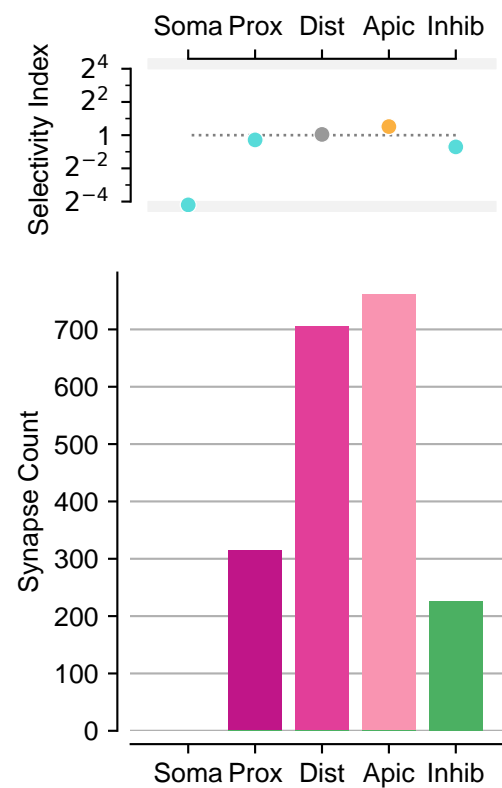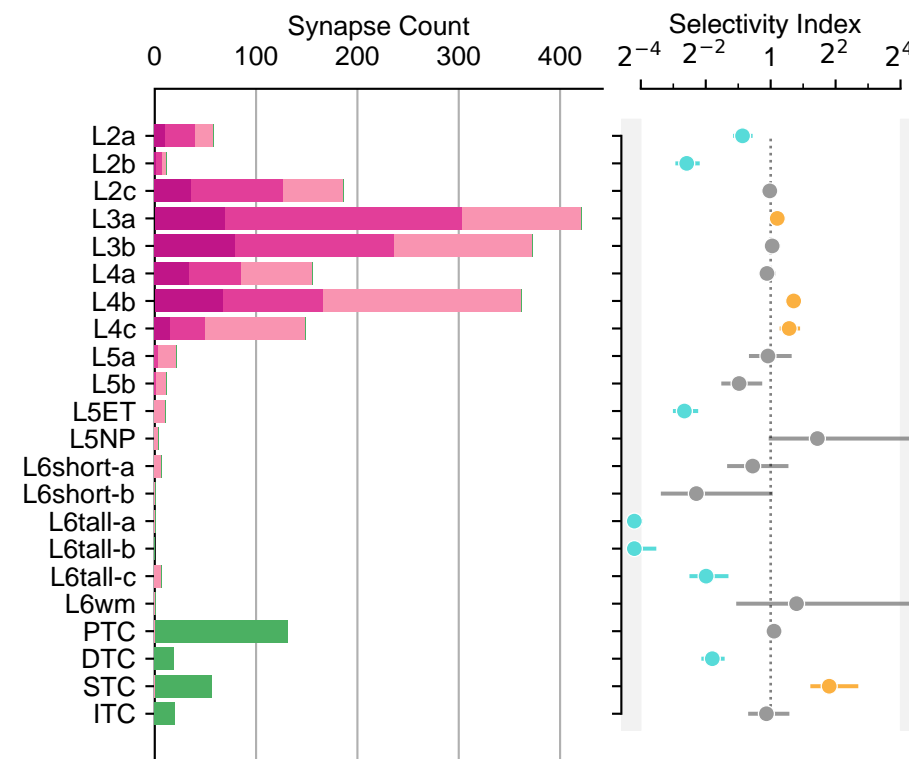

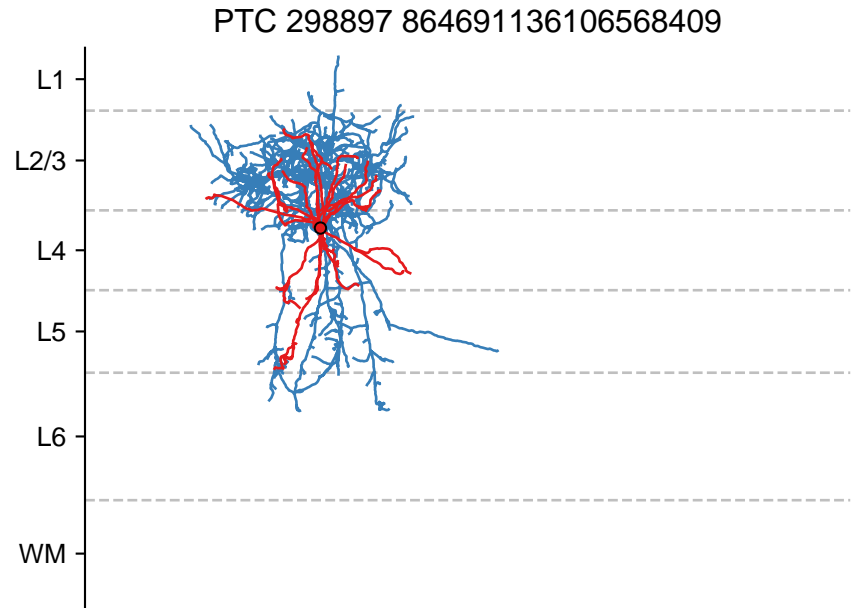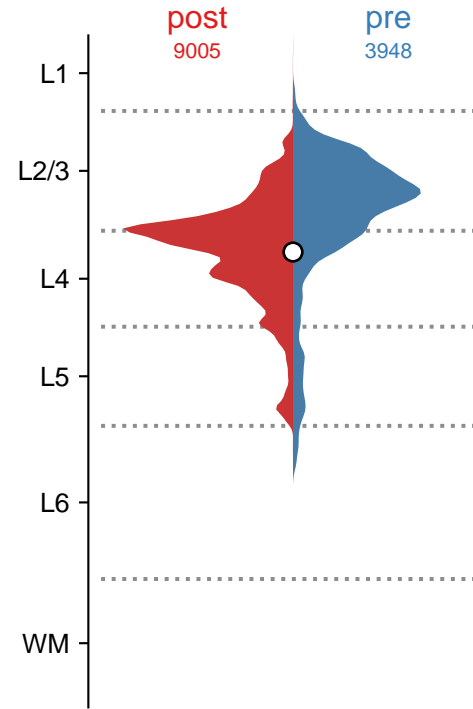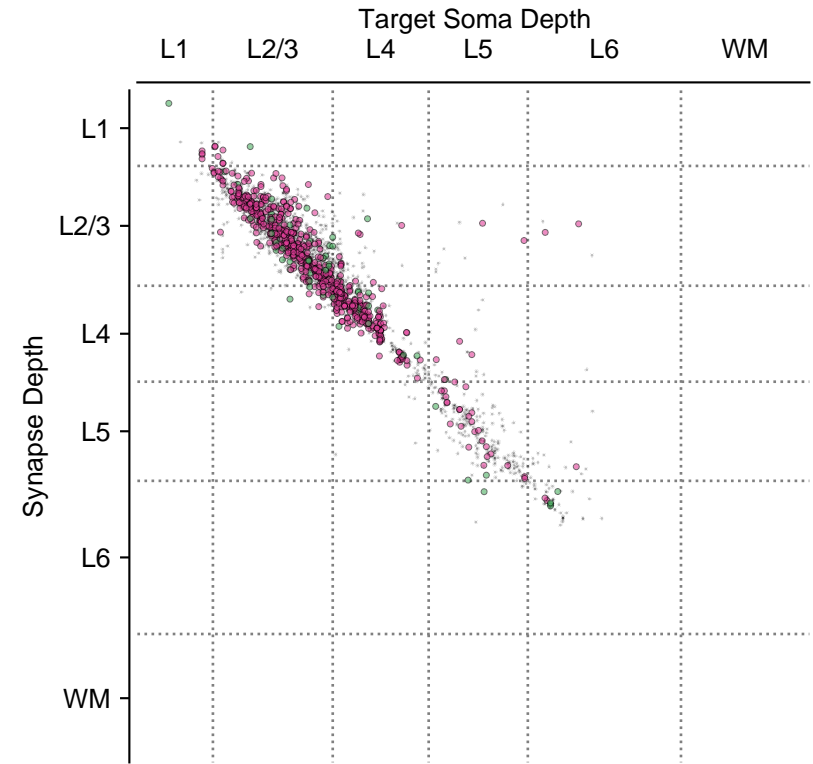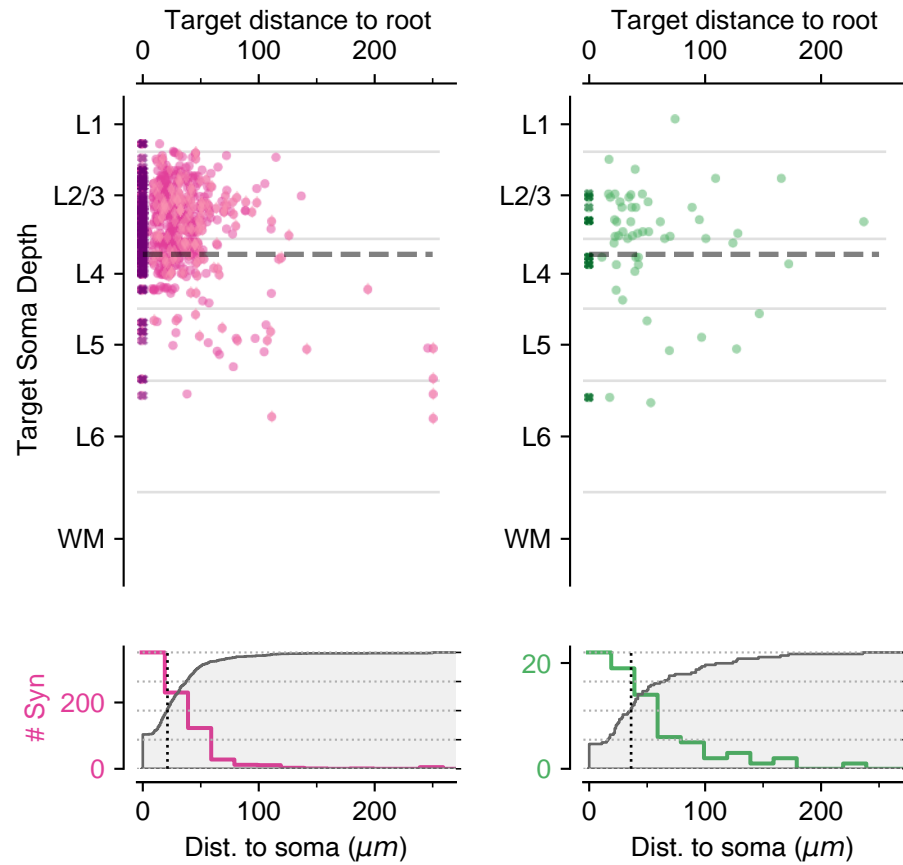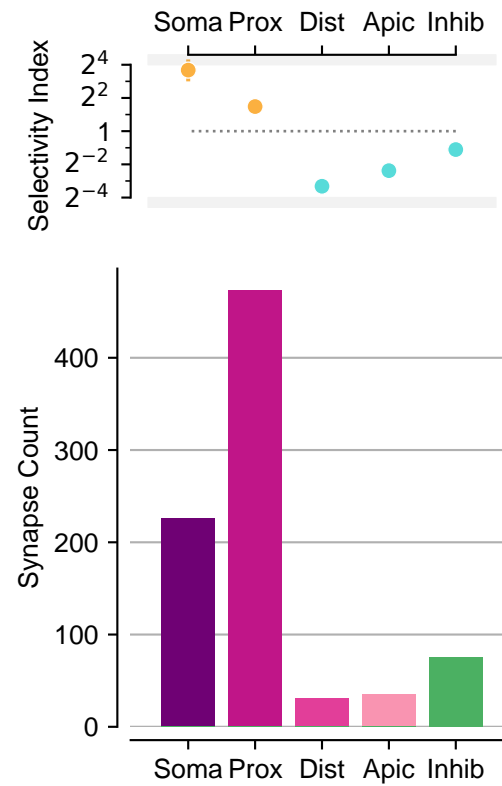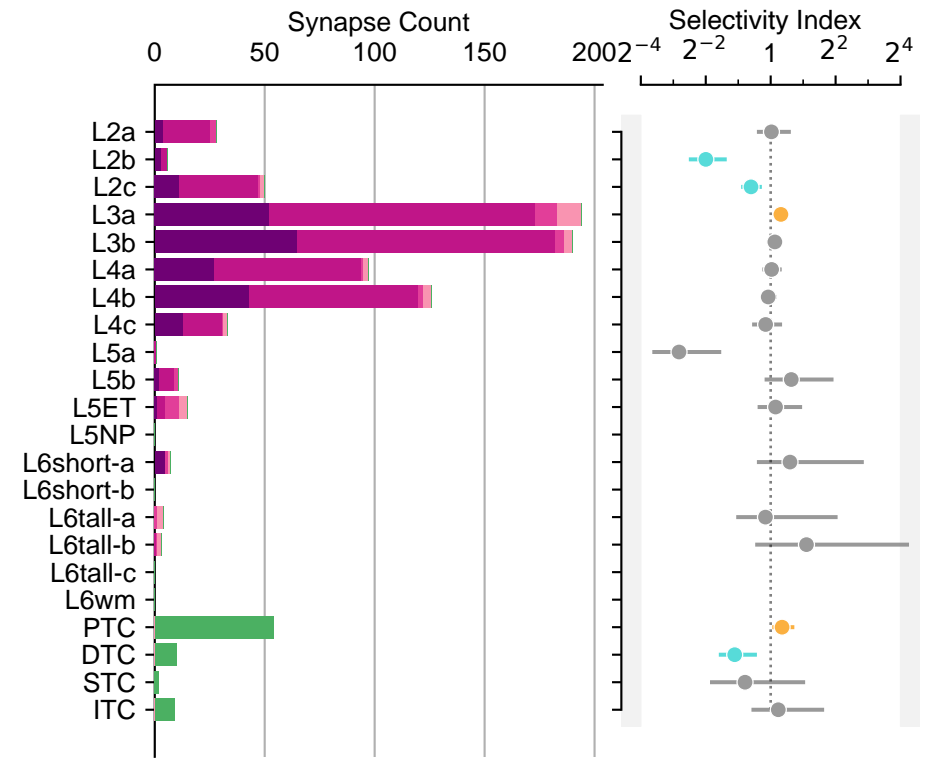

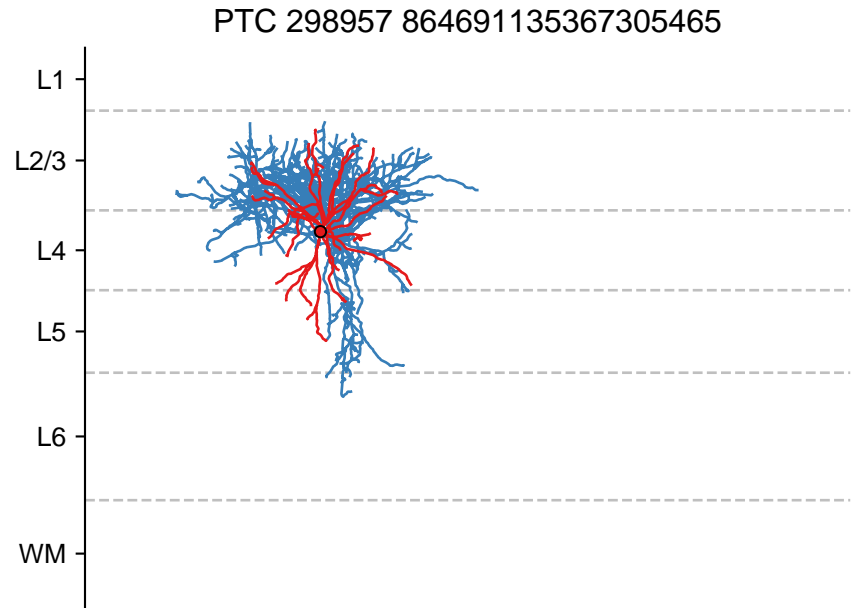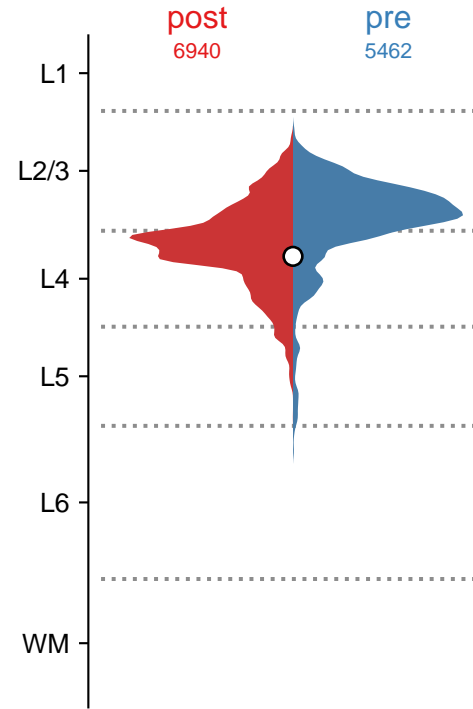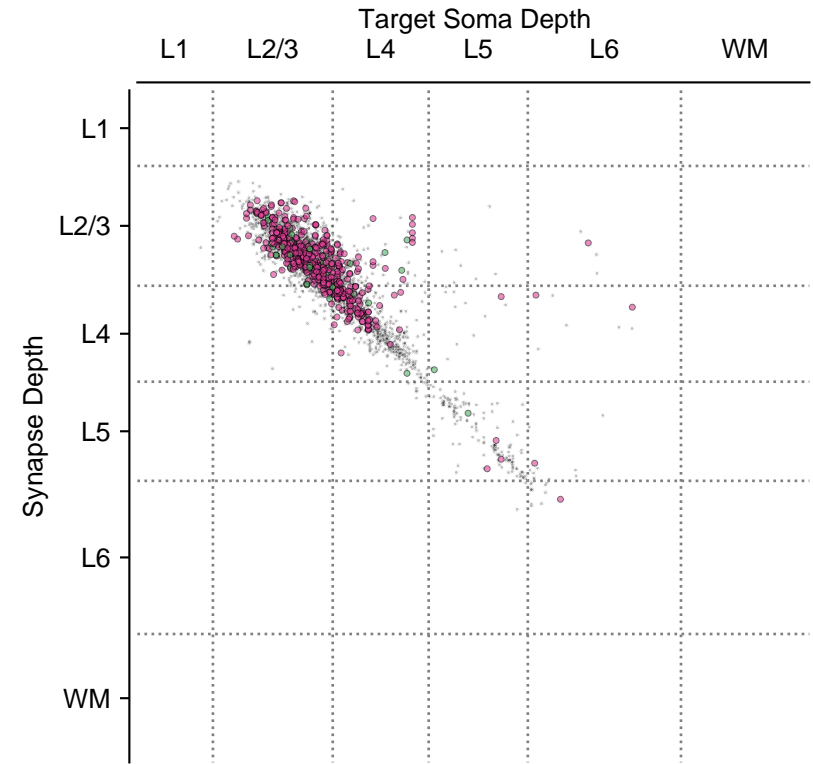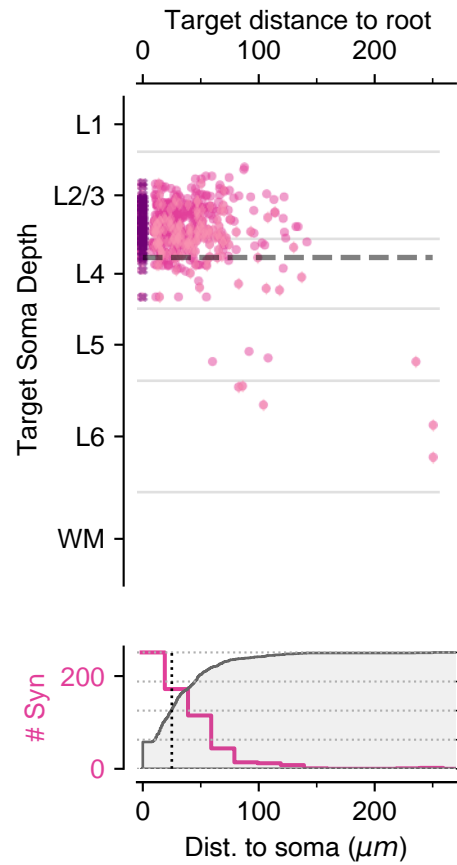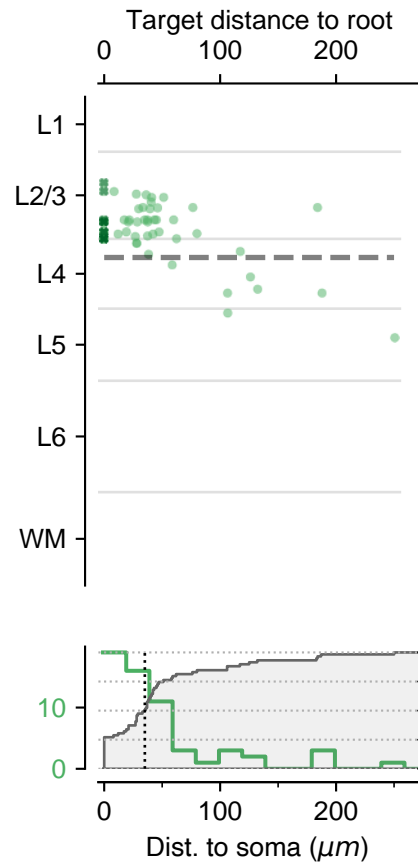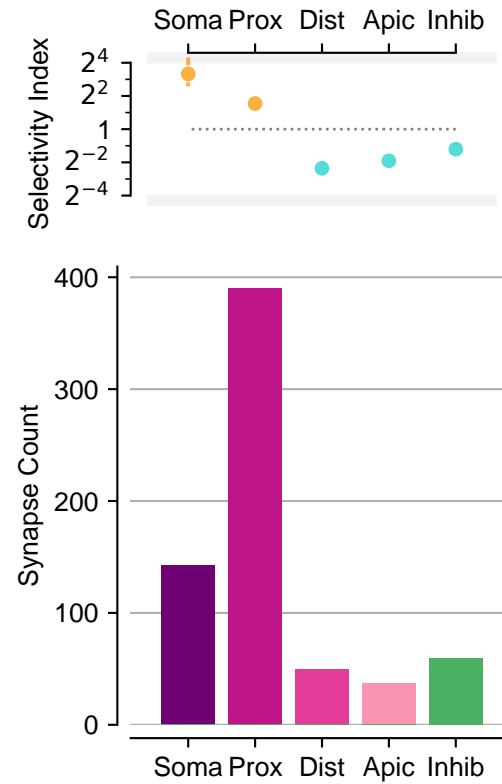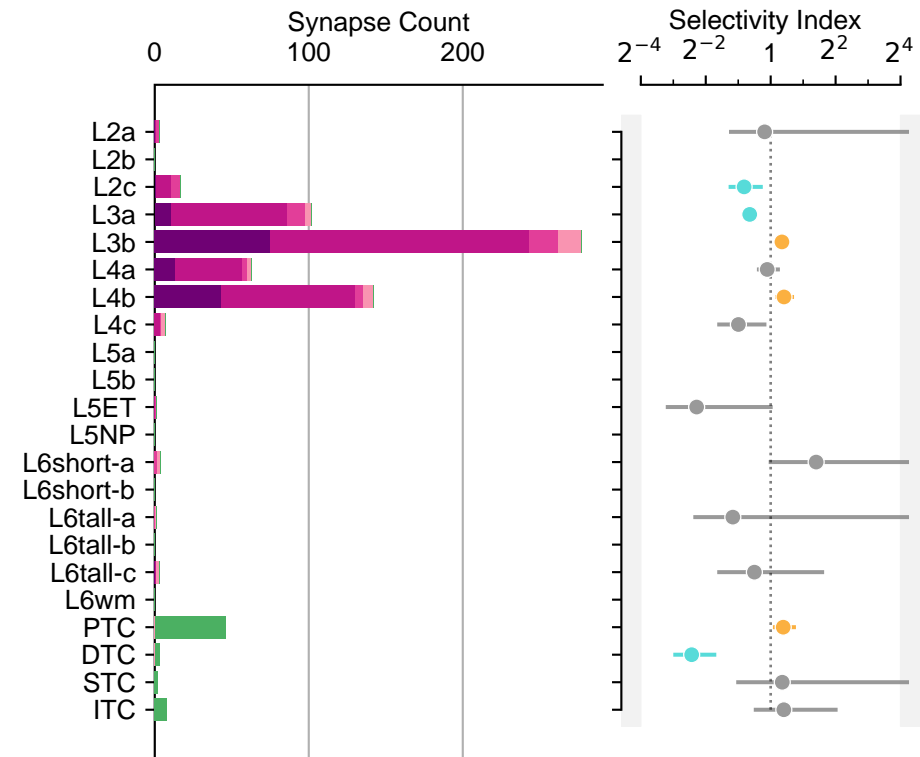

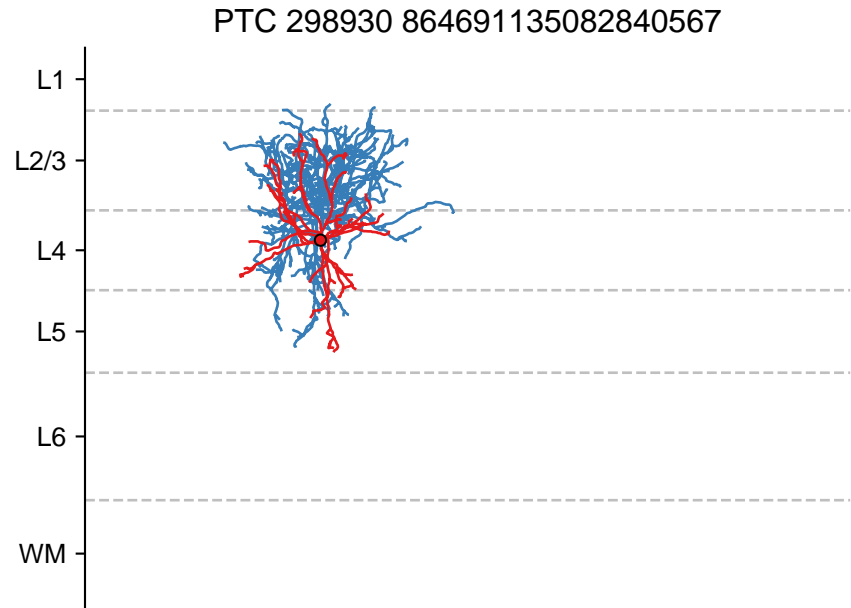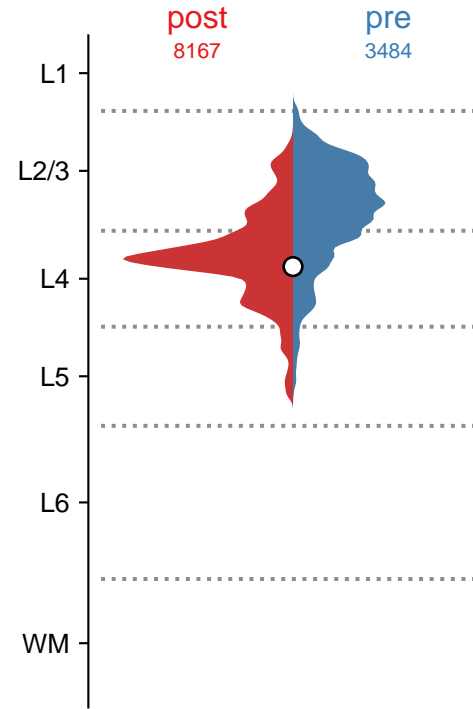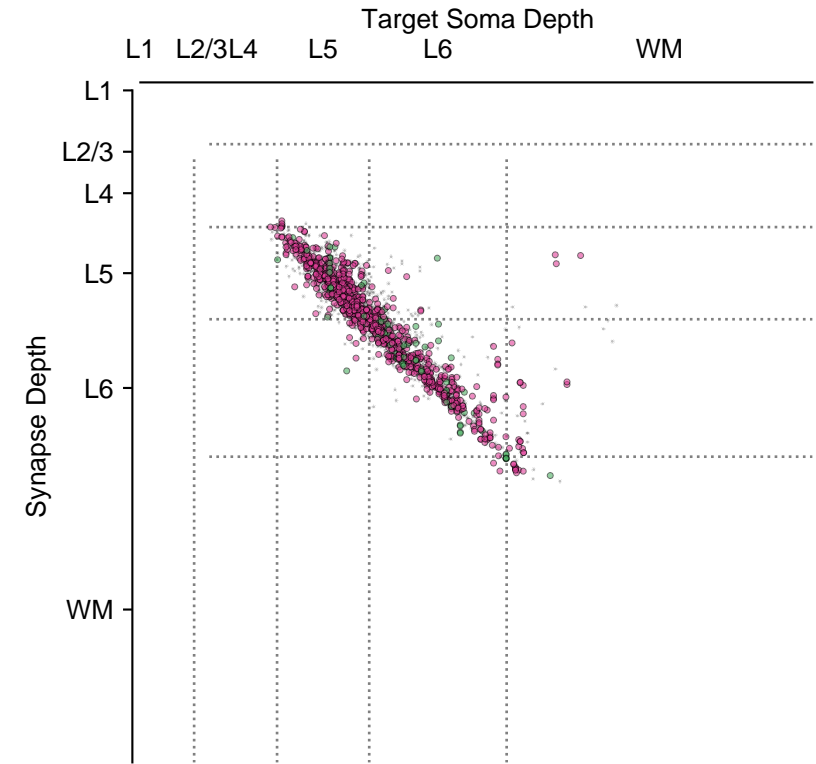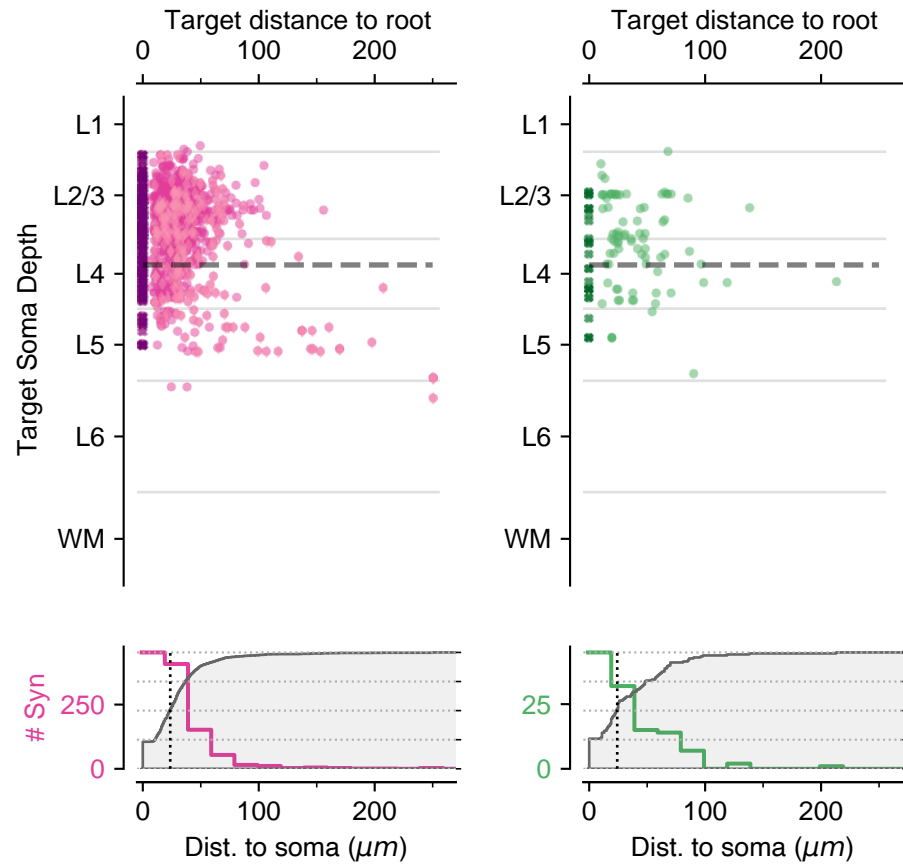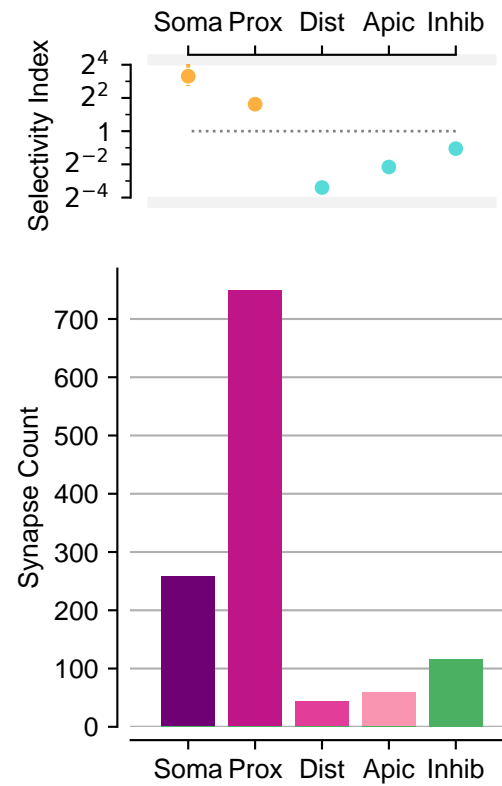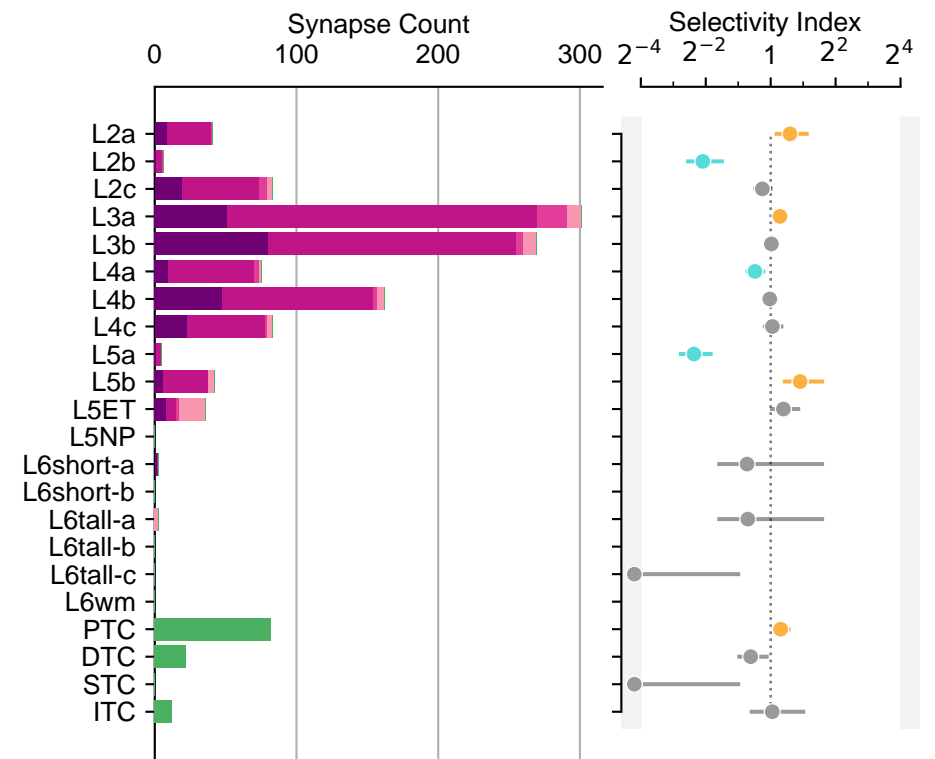



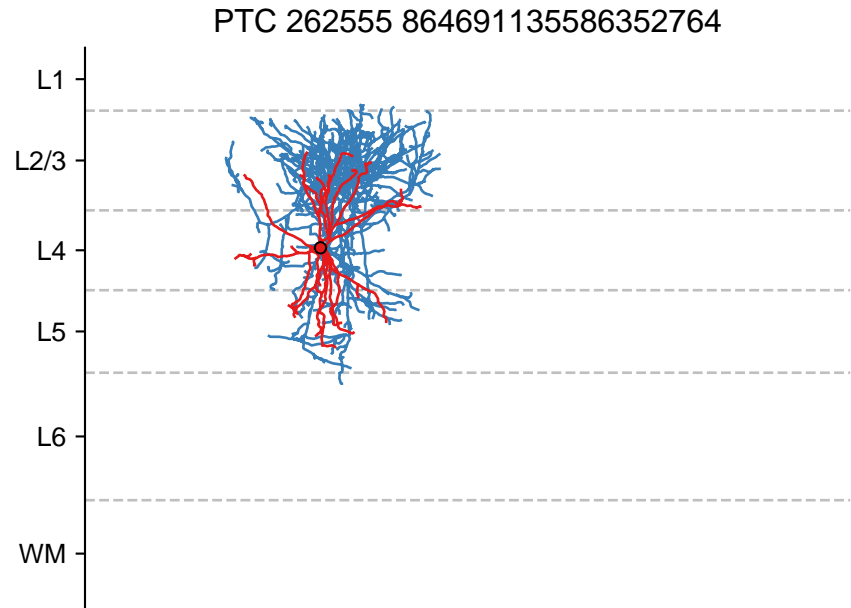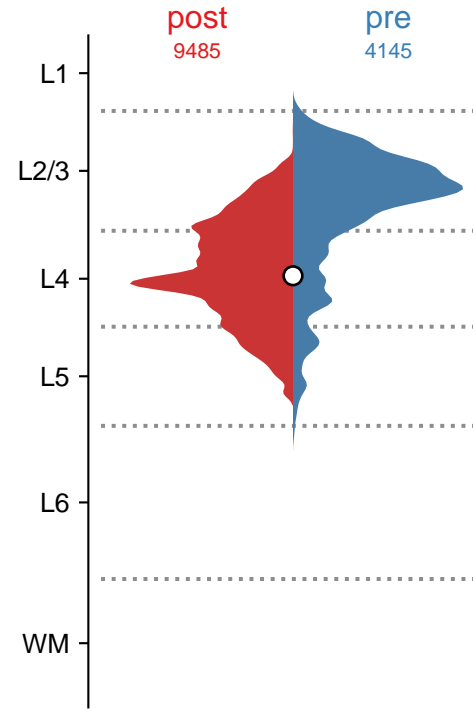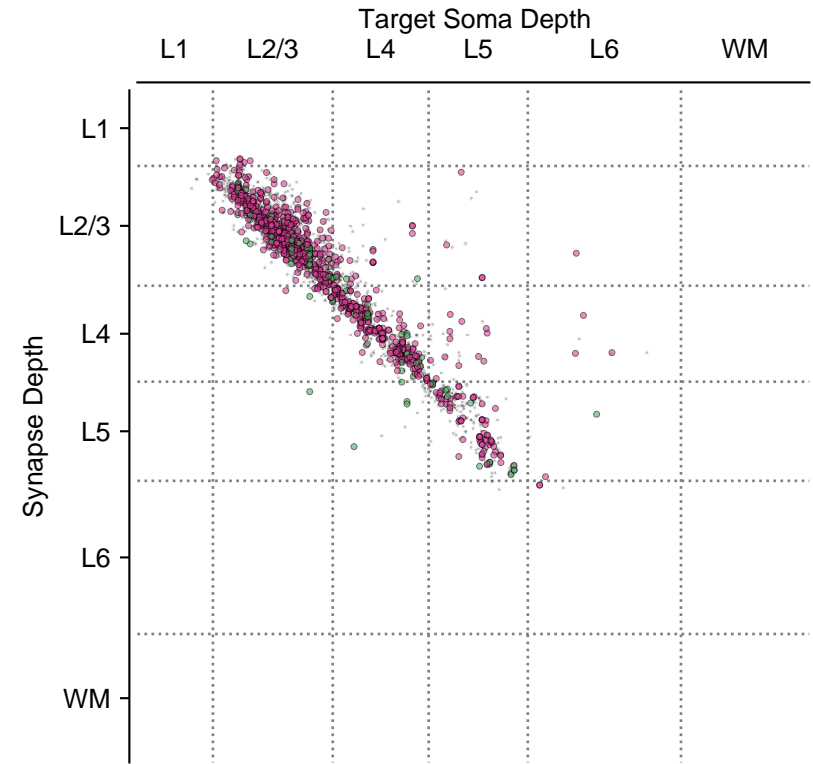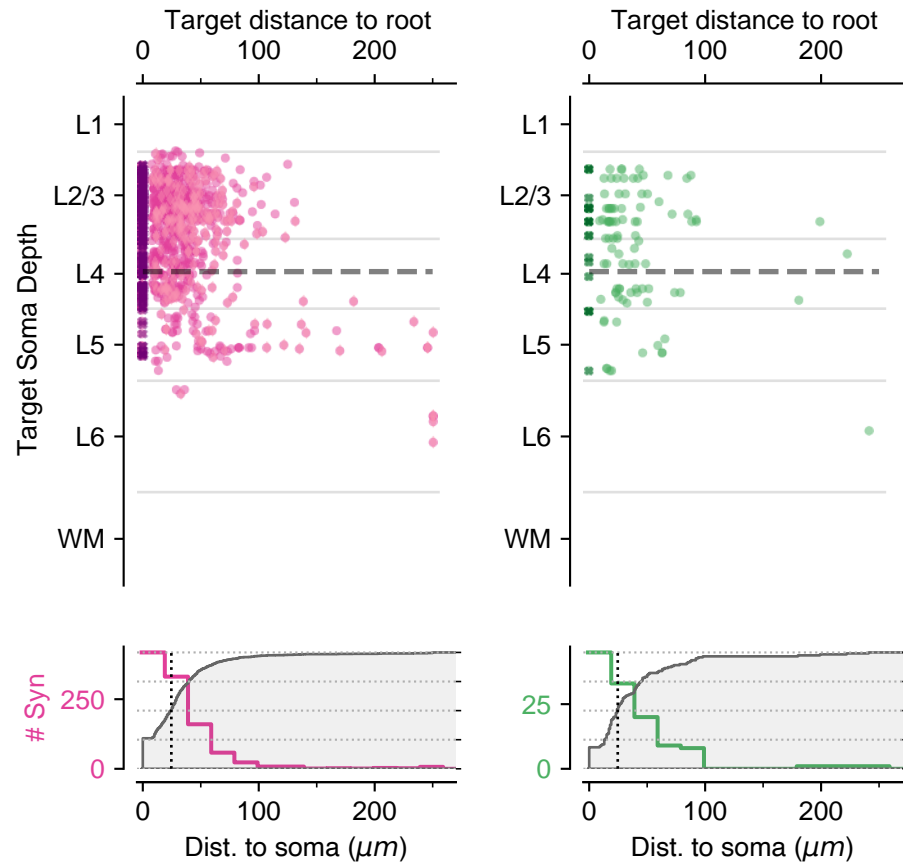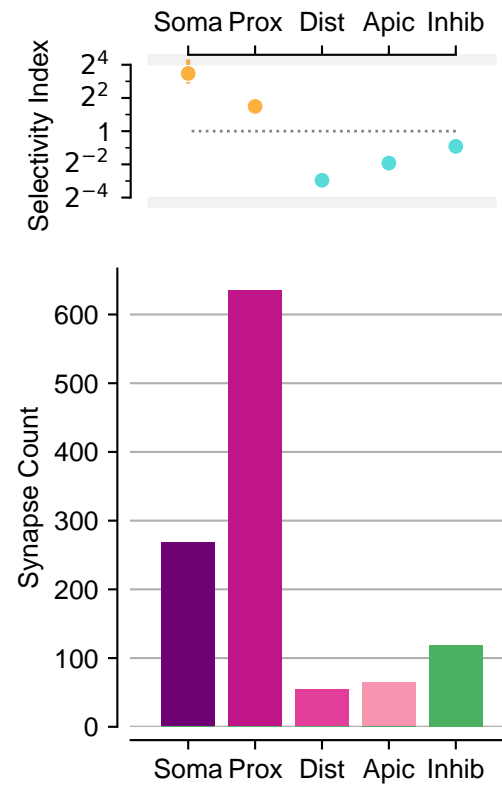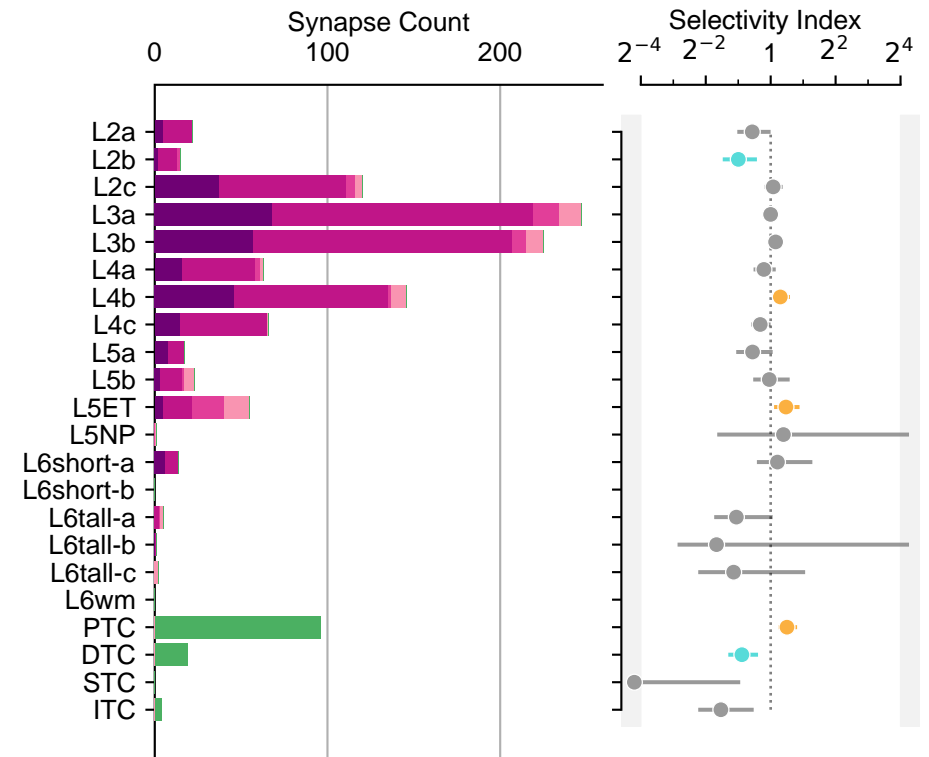

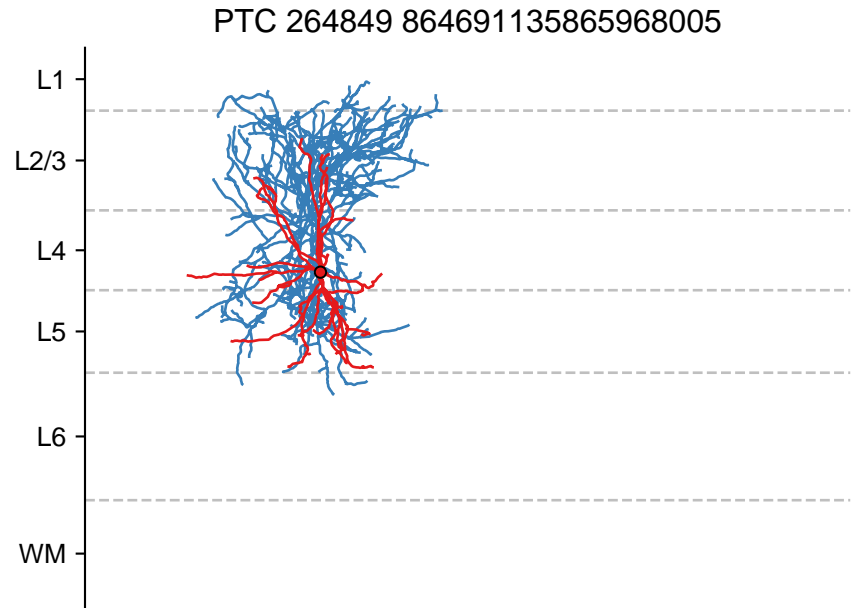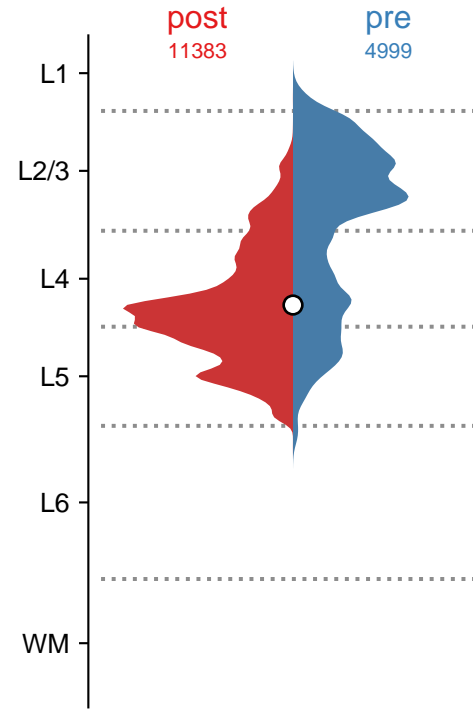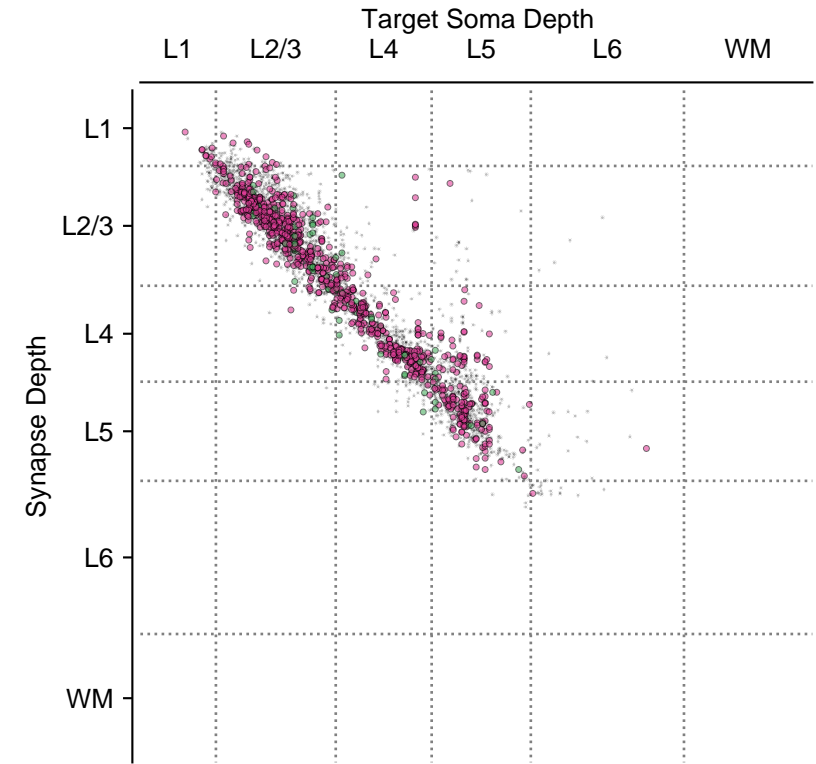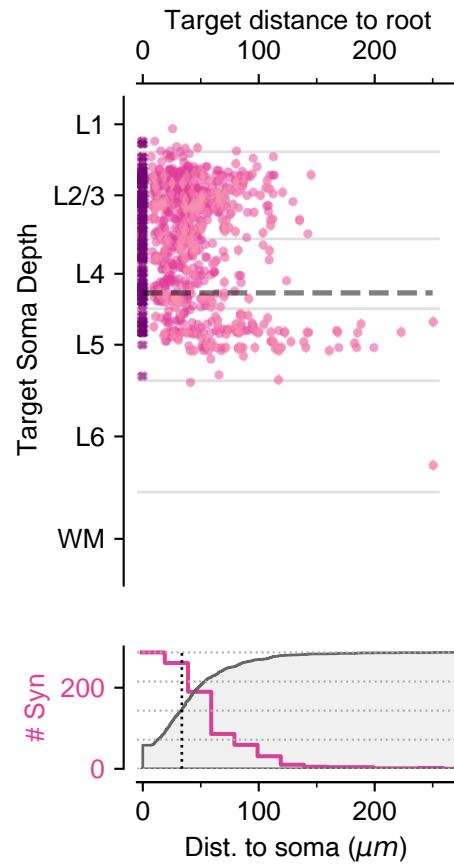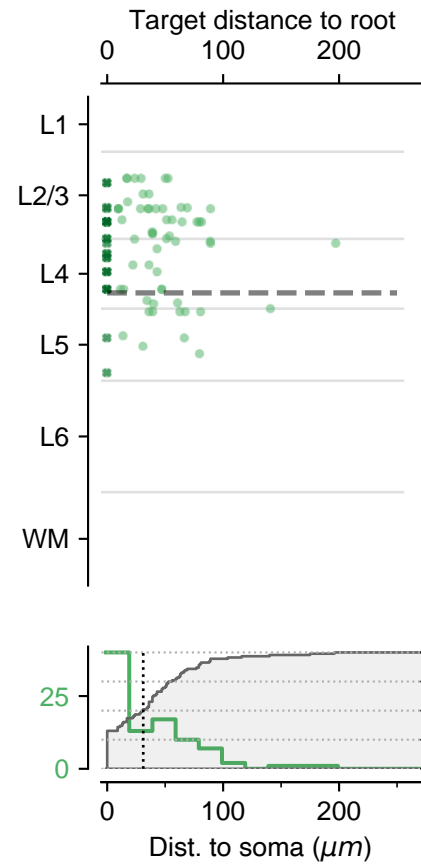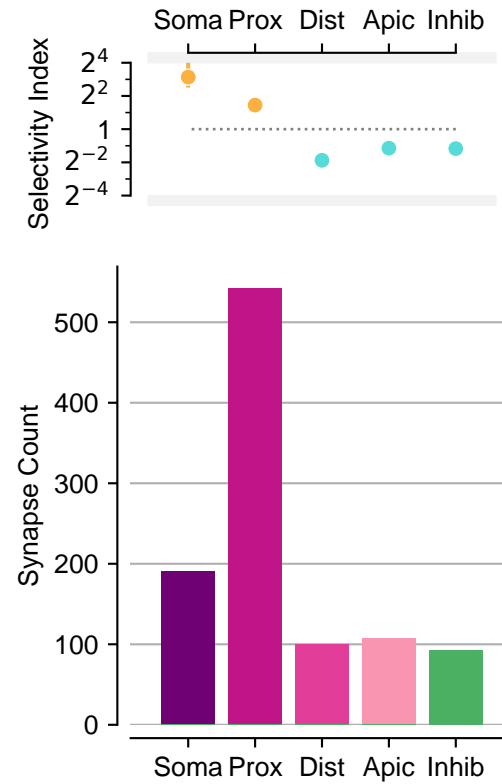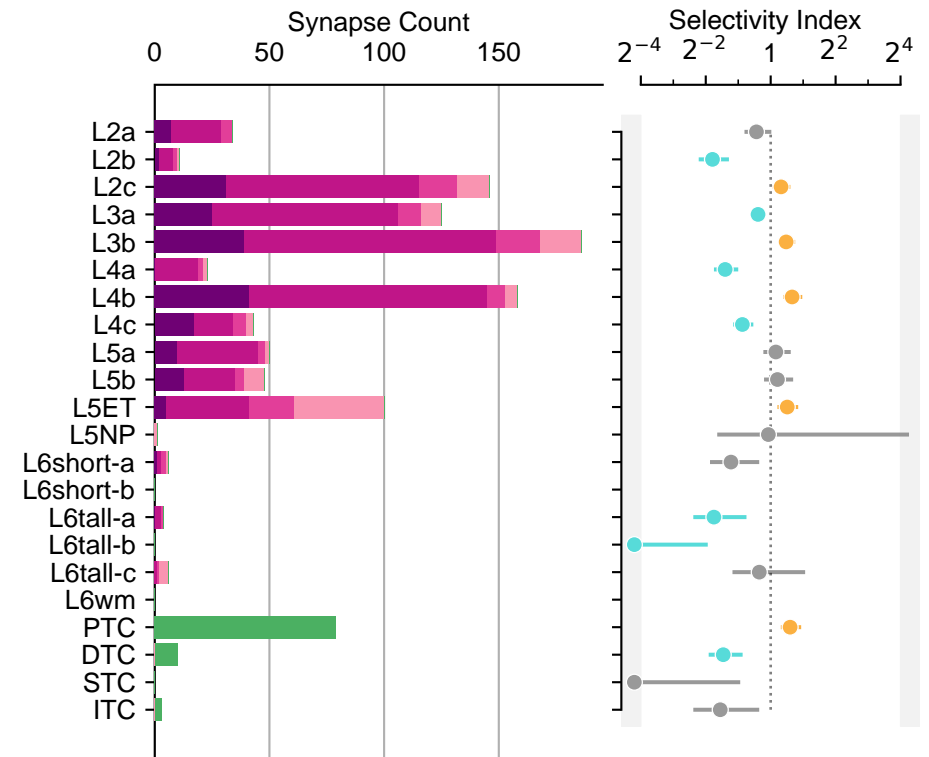

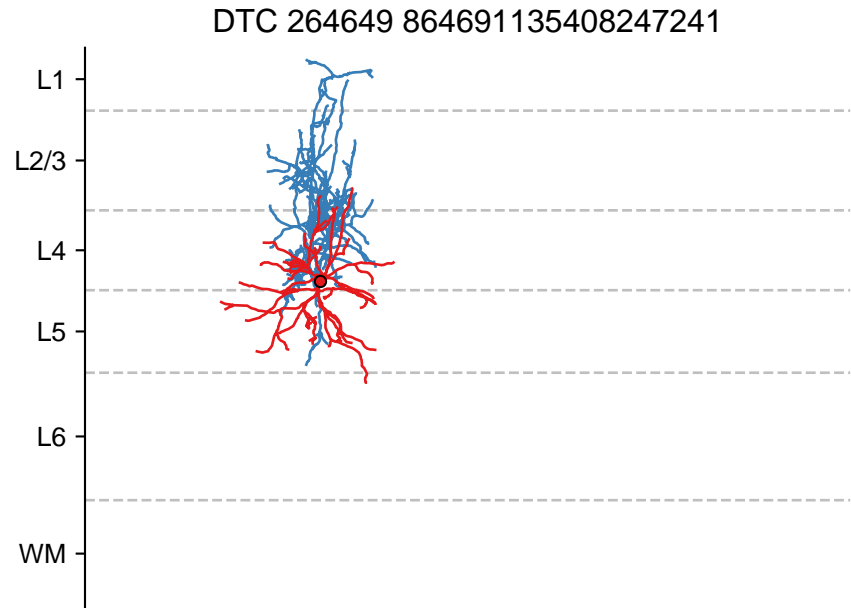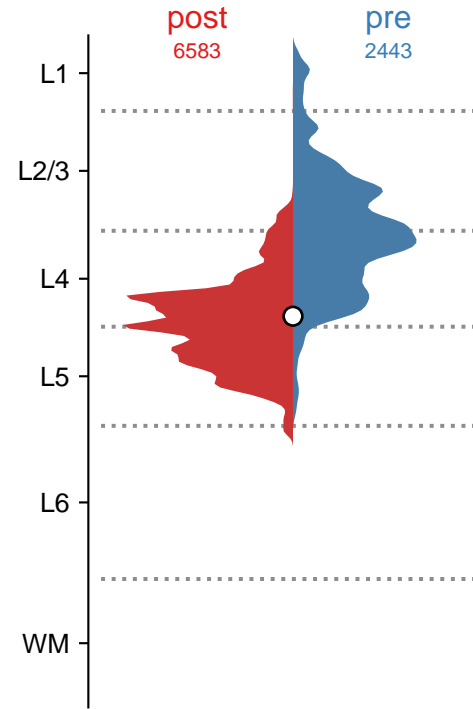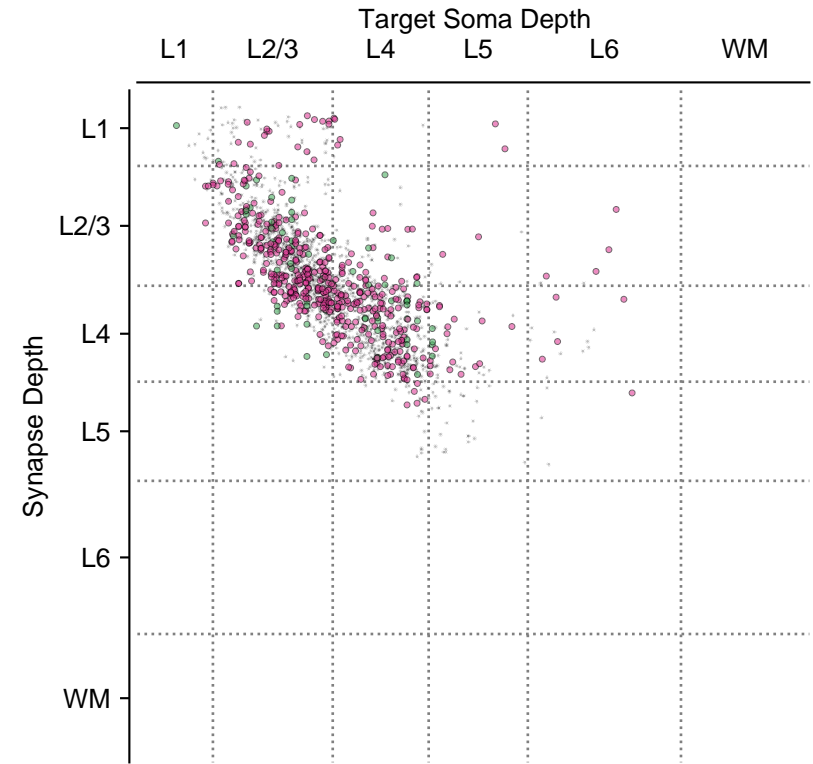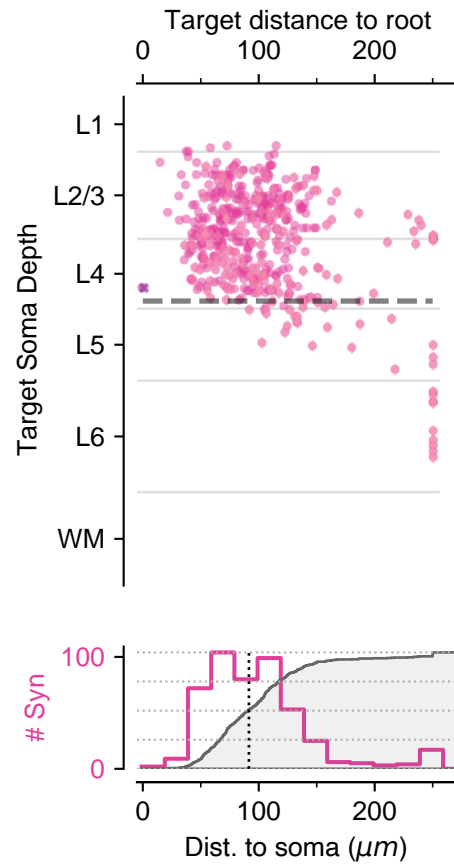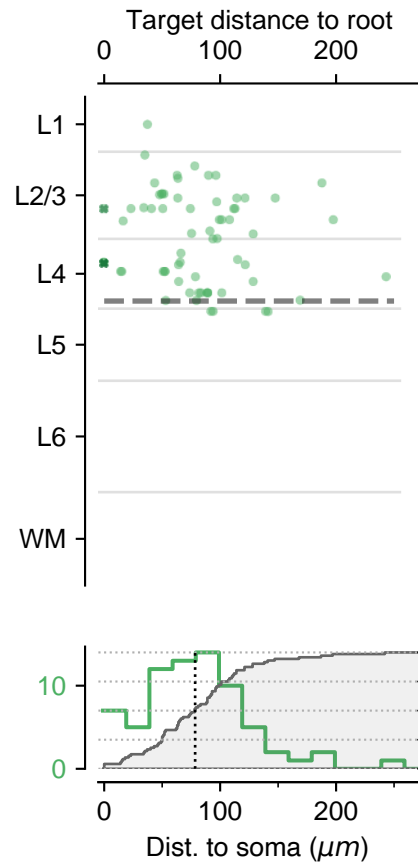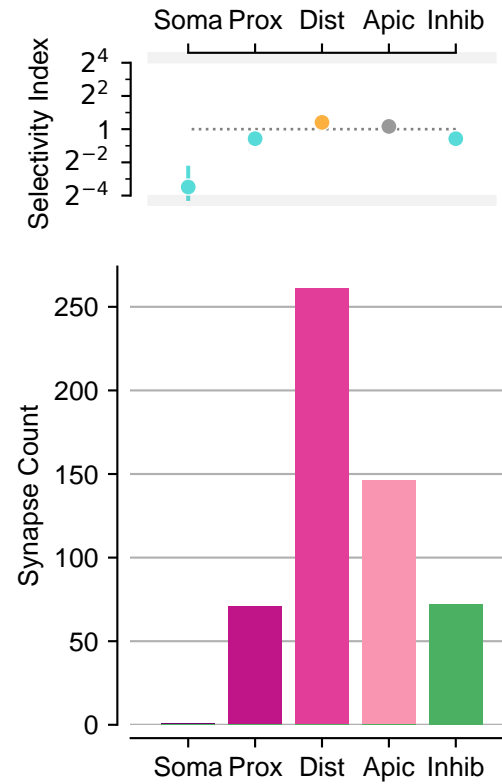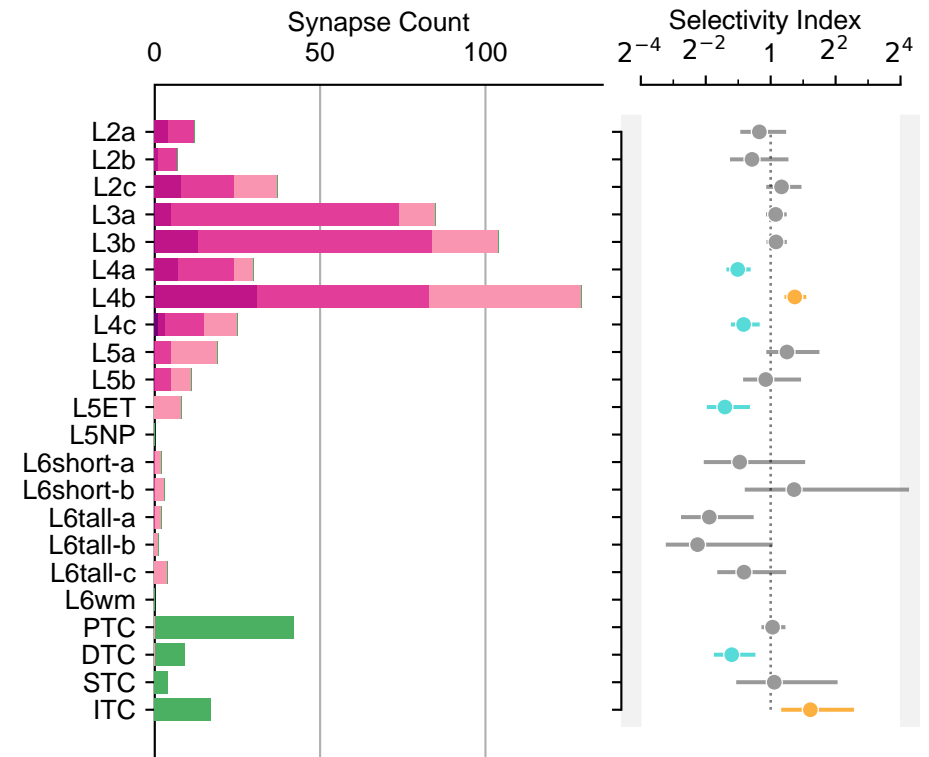

# Motif Group 5

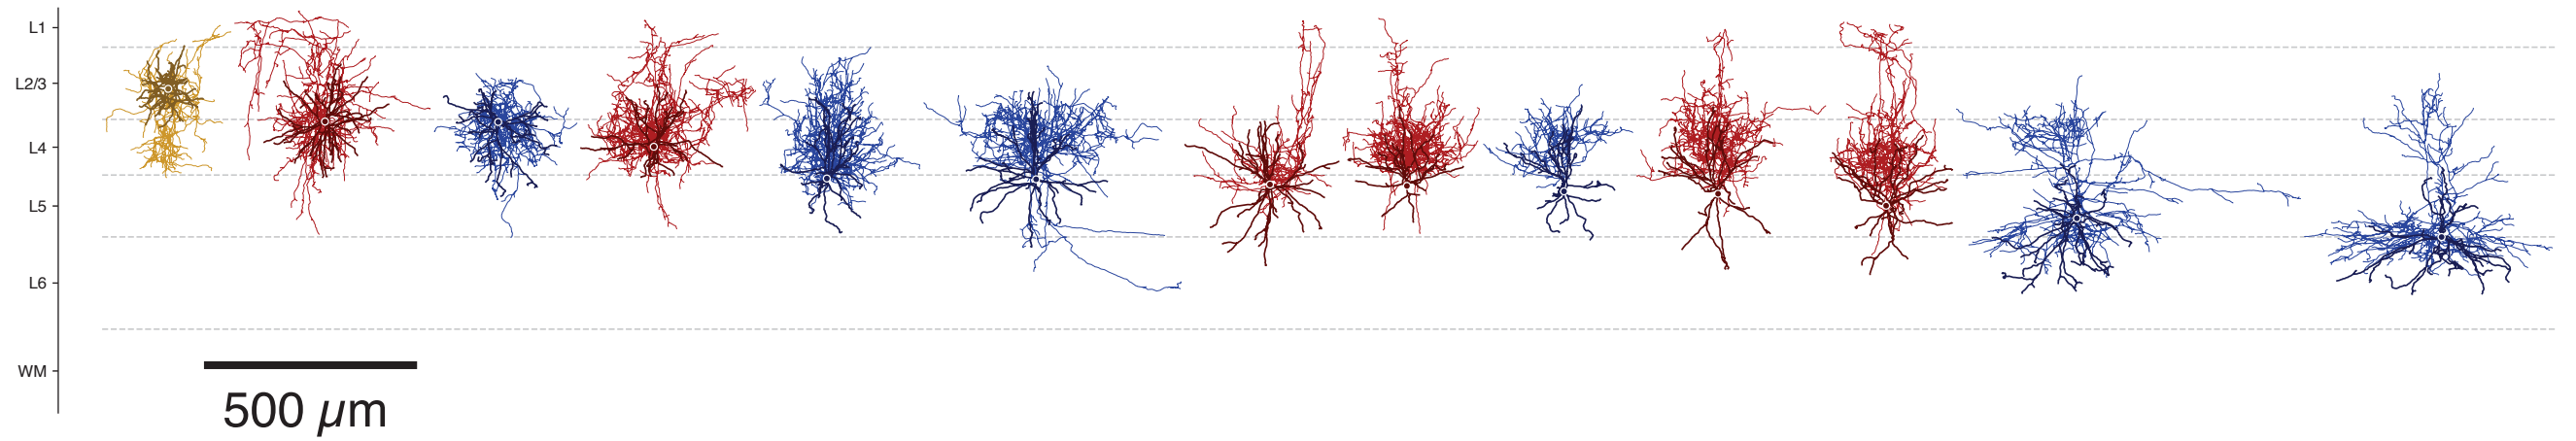

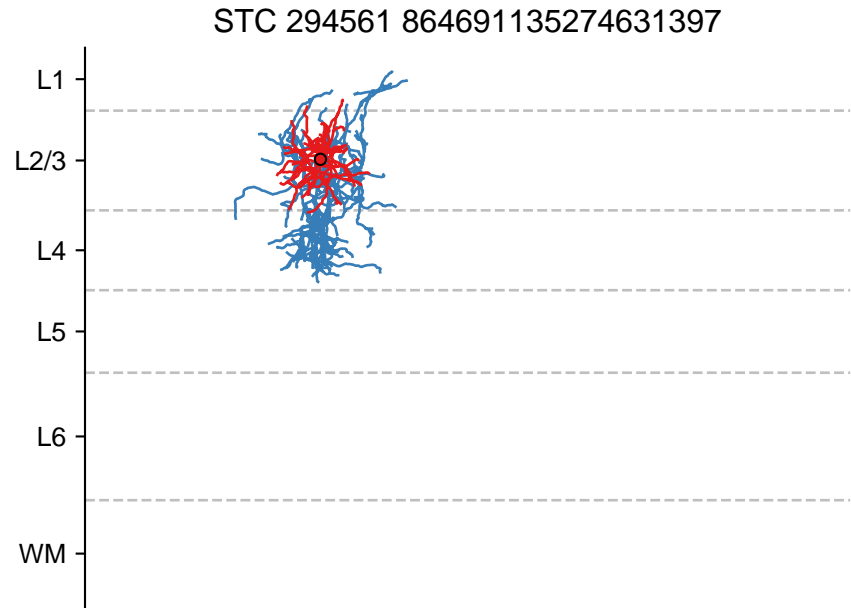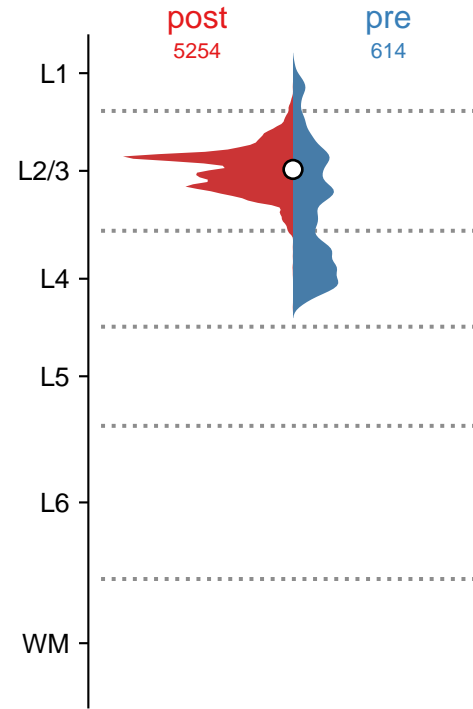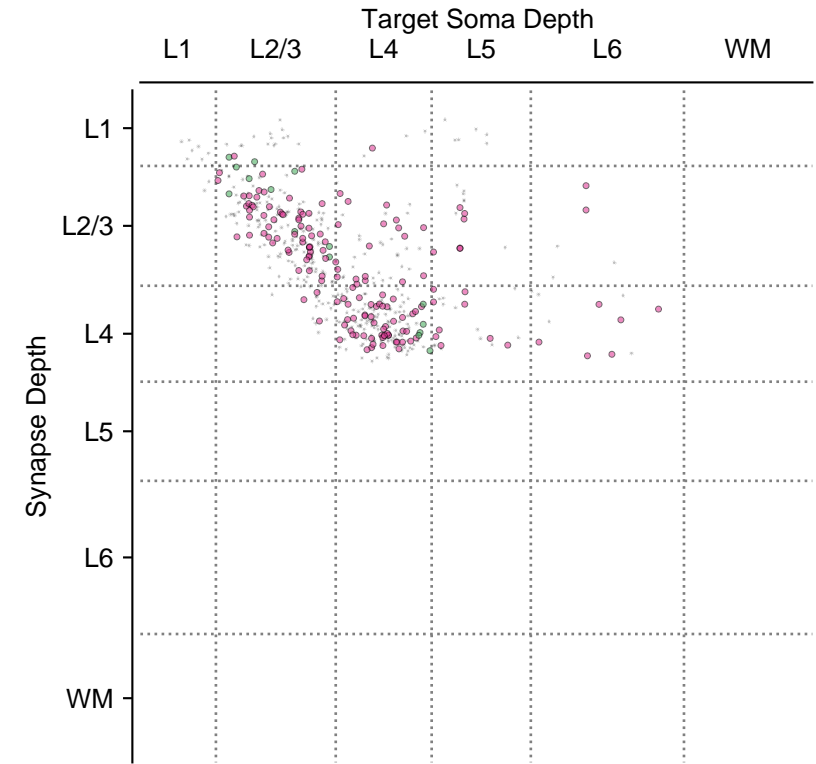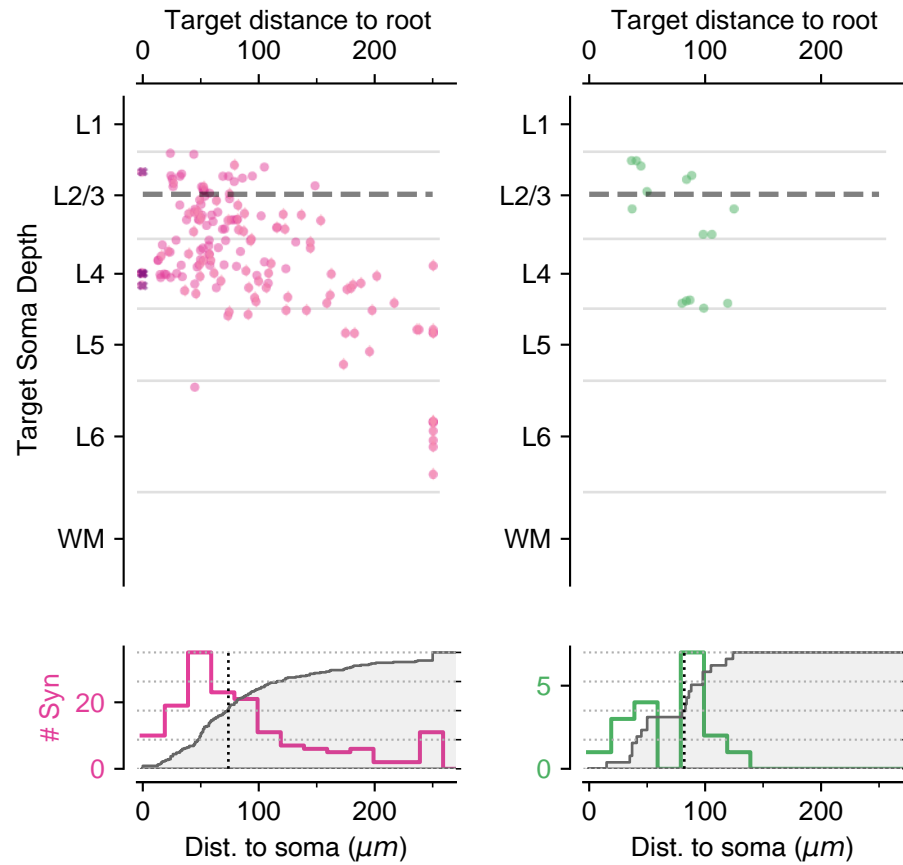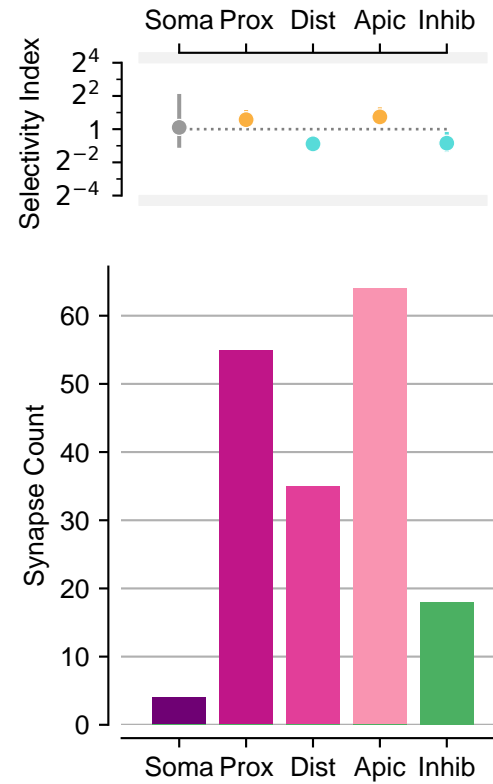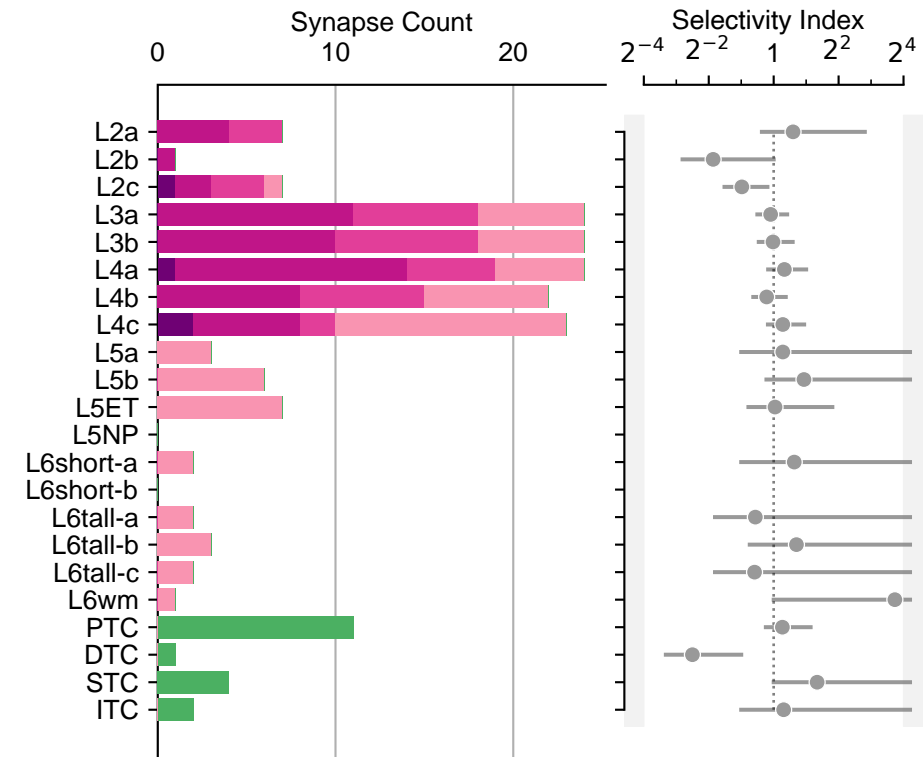

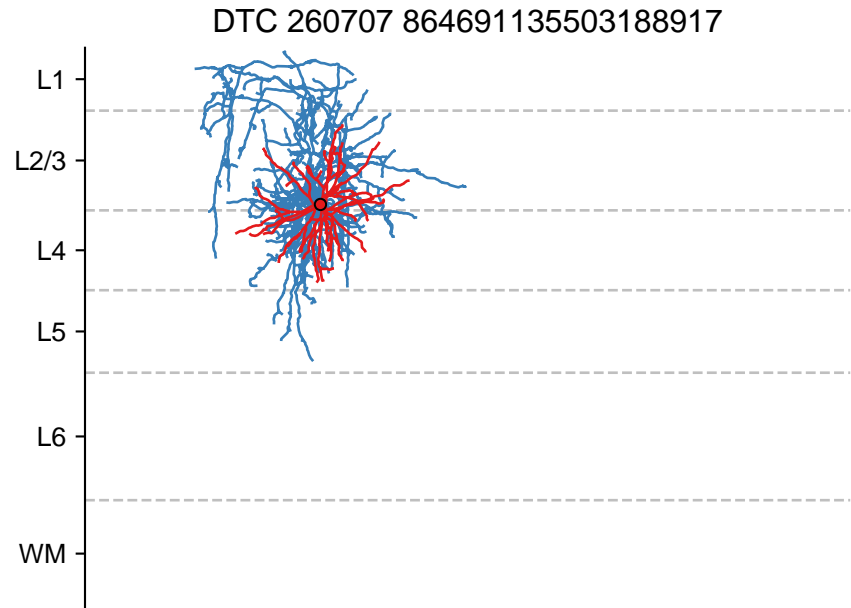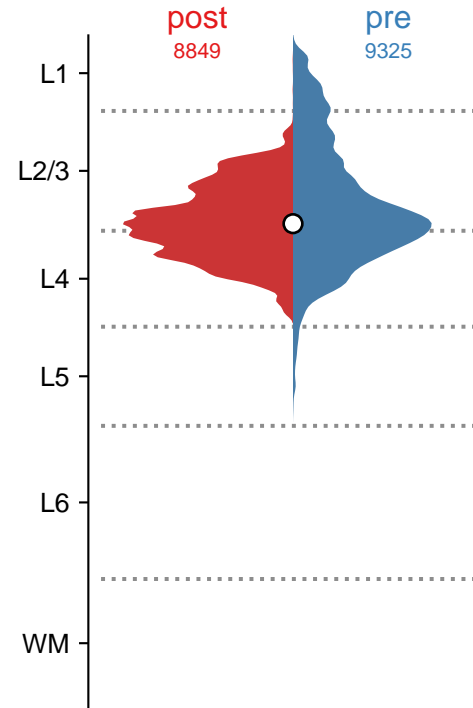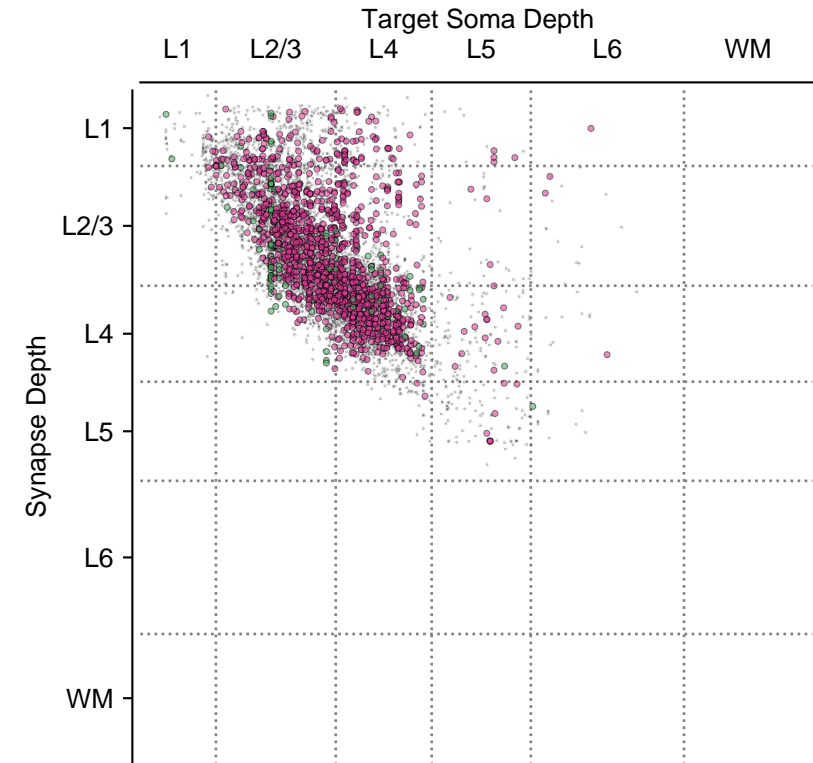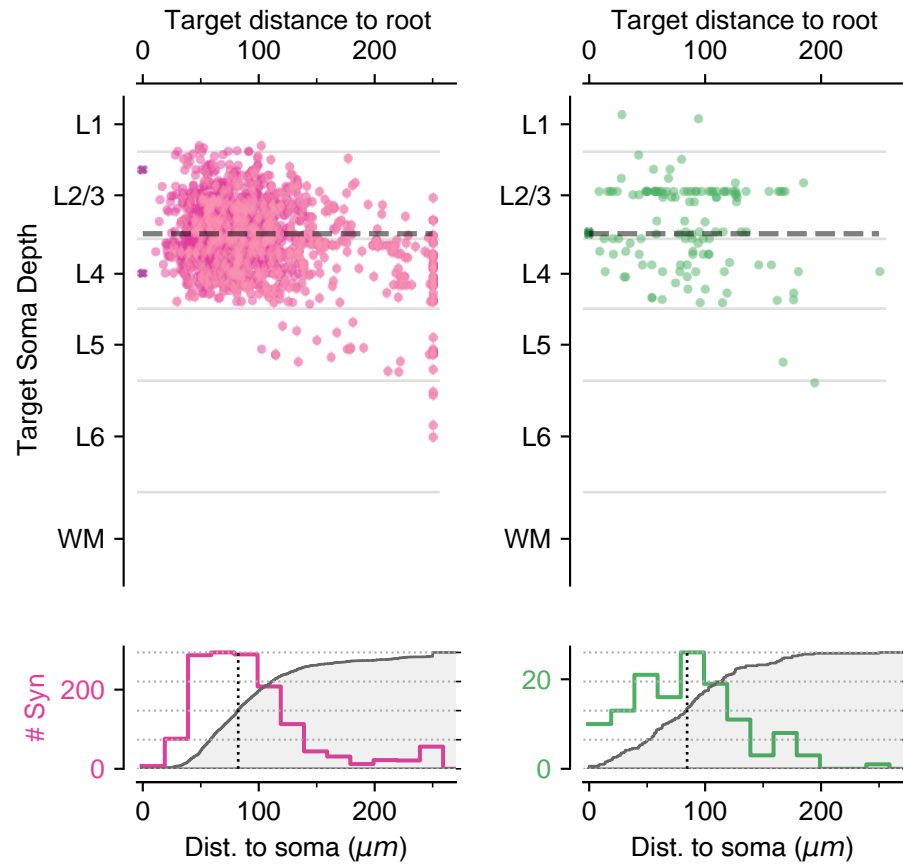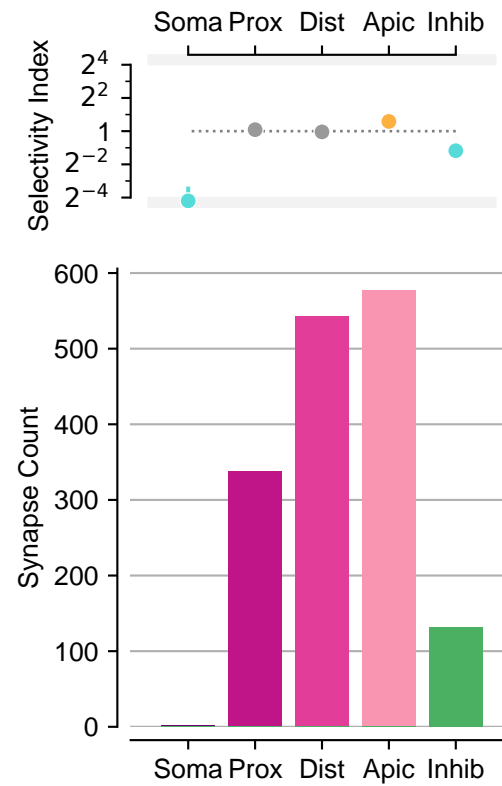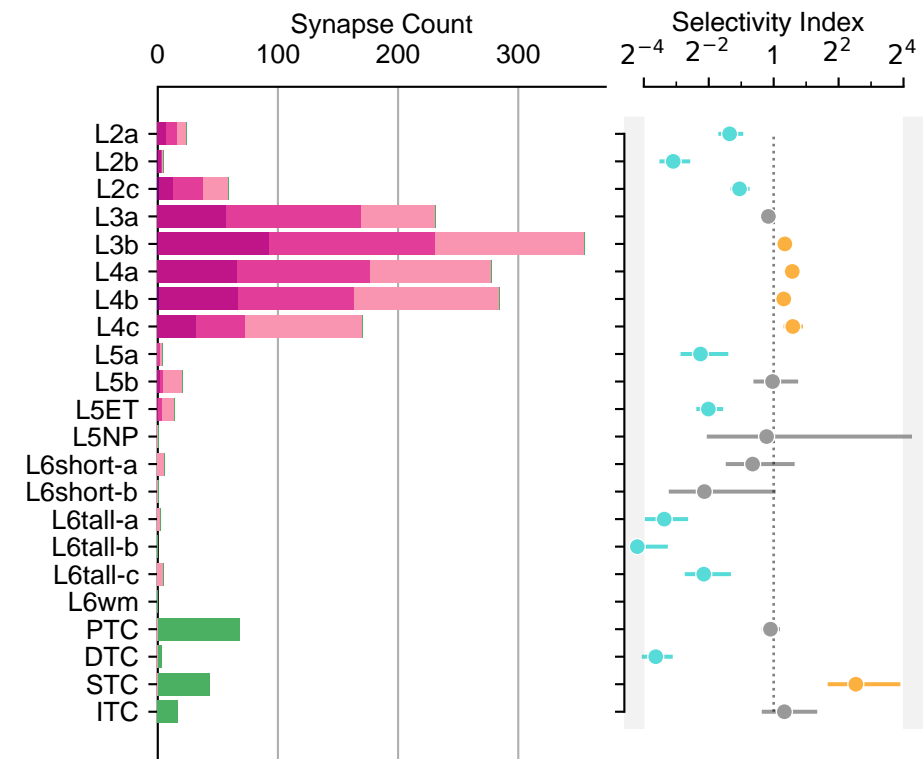

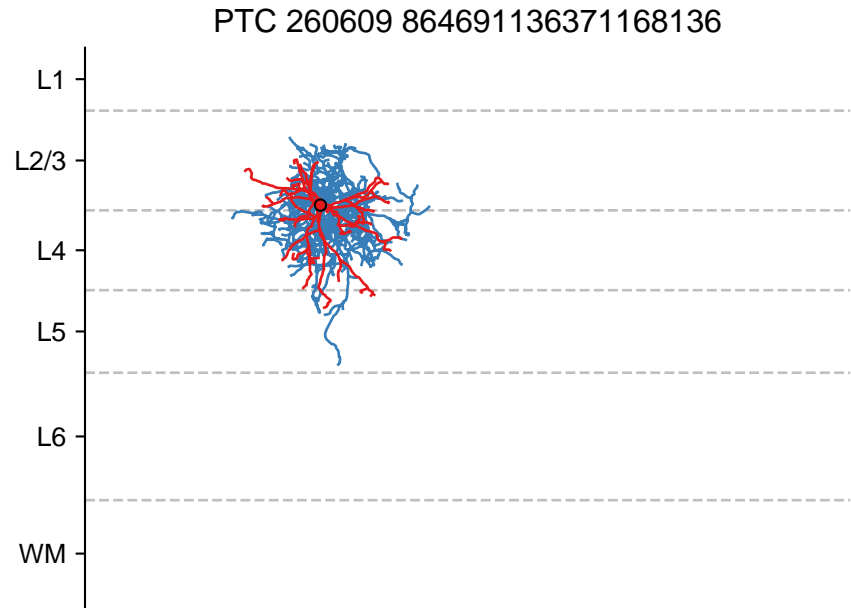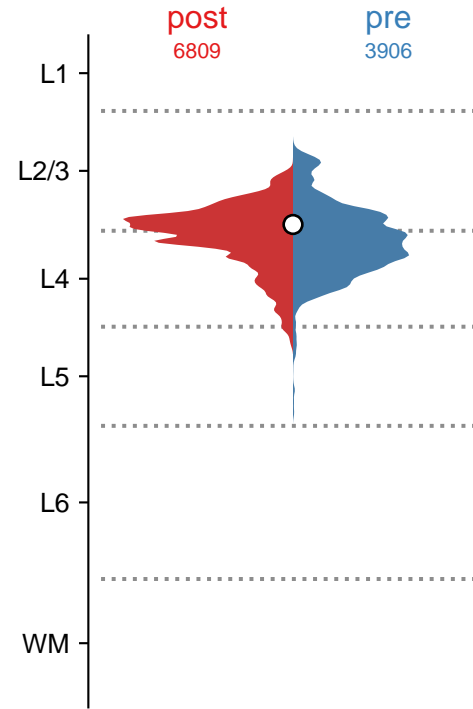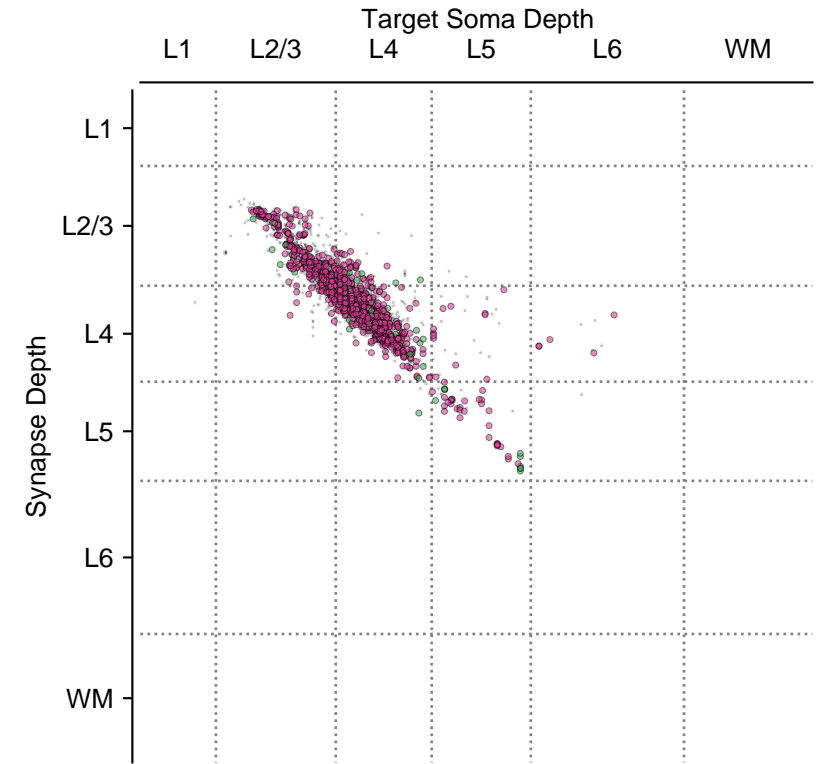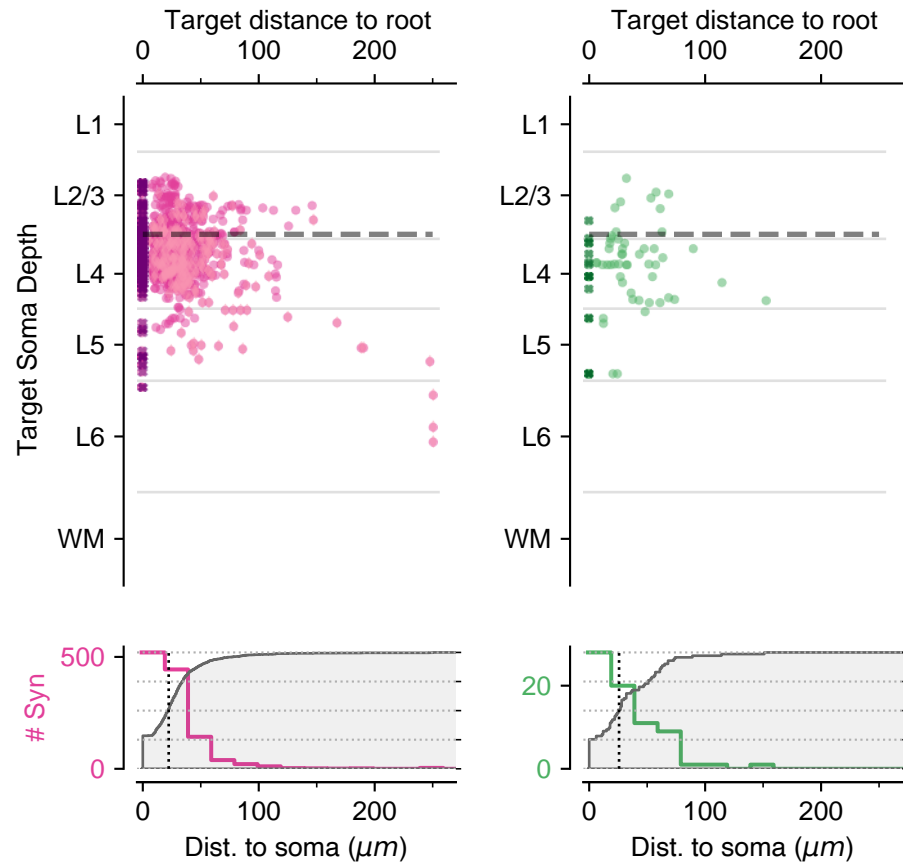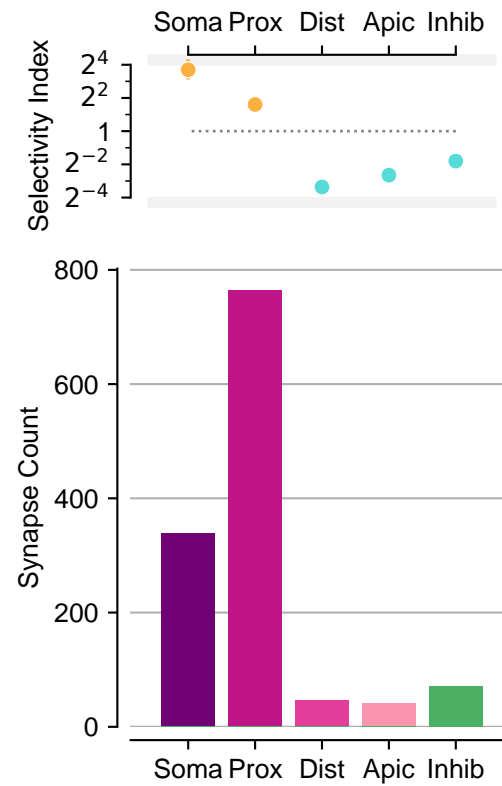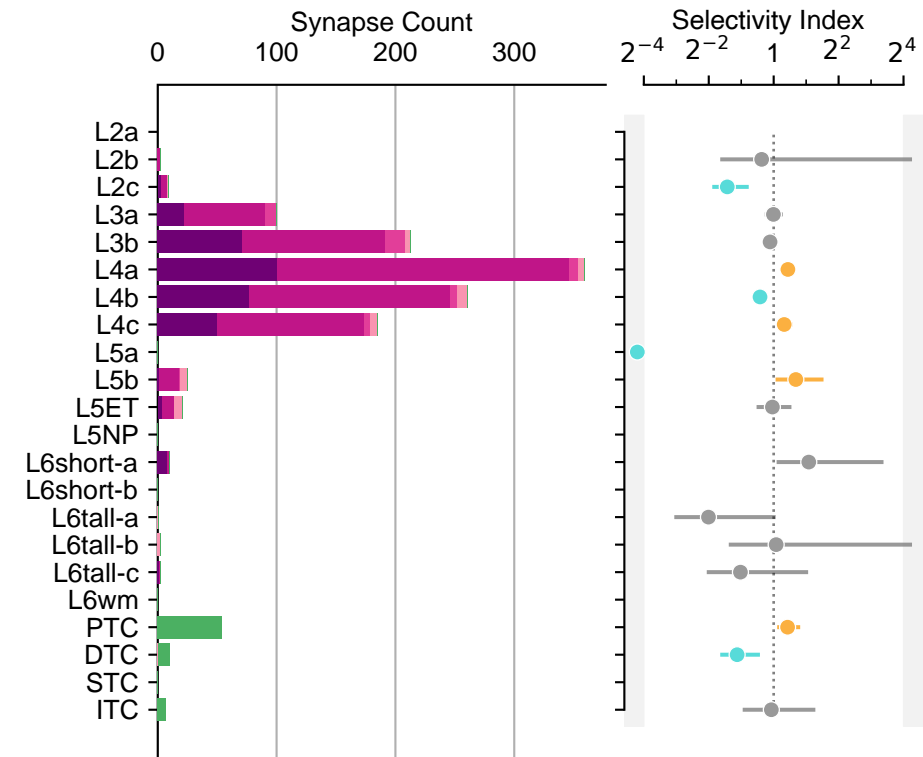

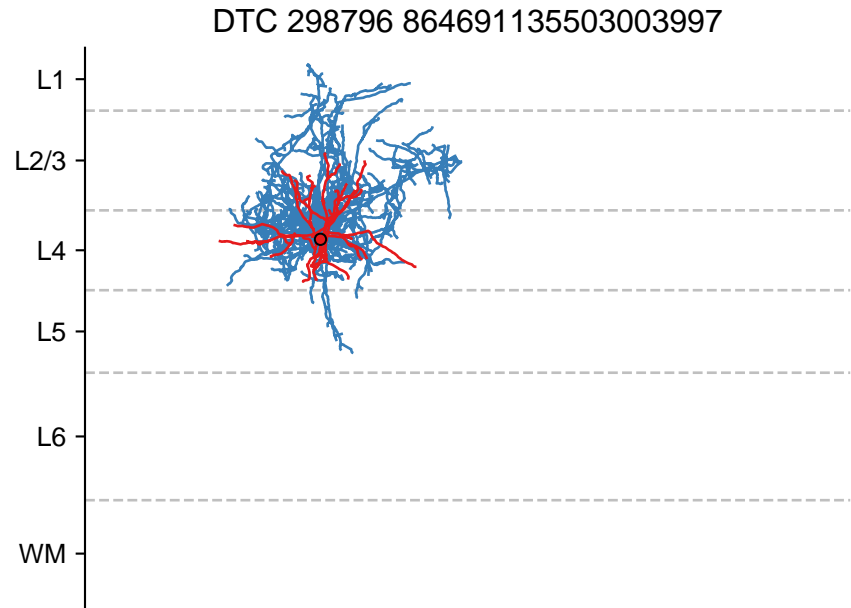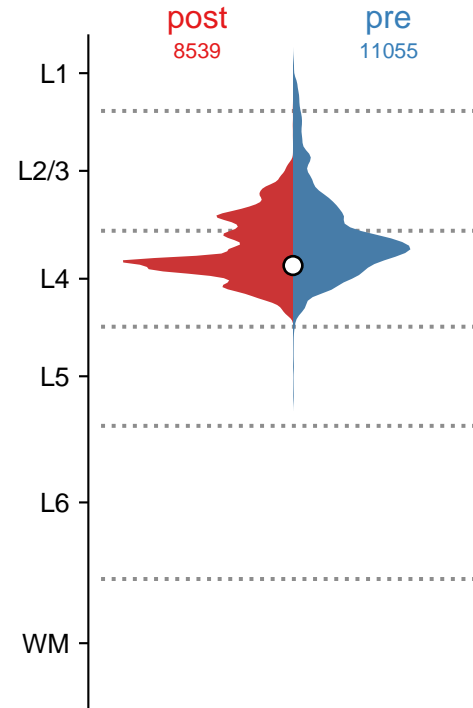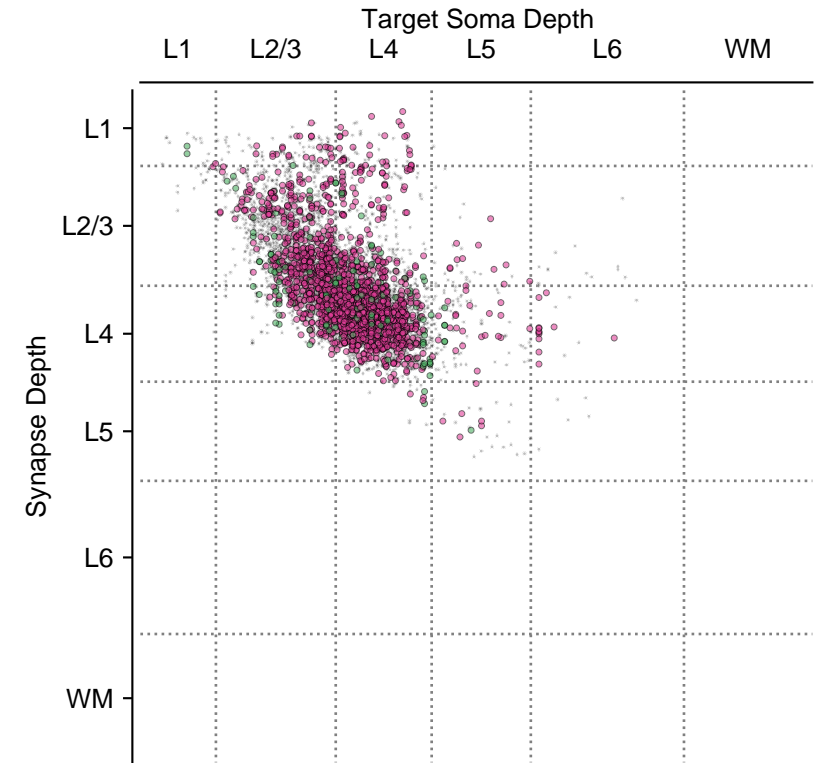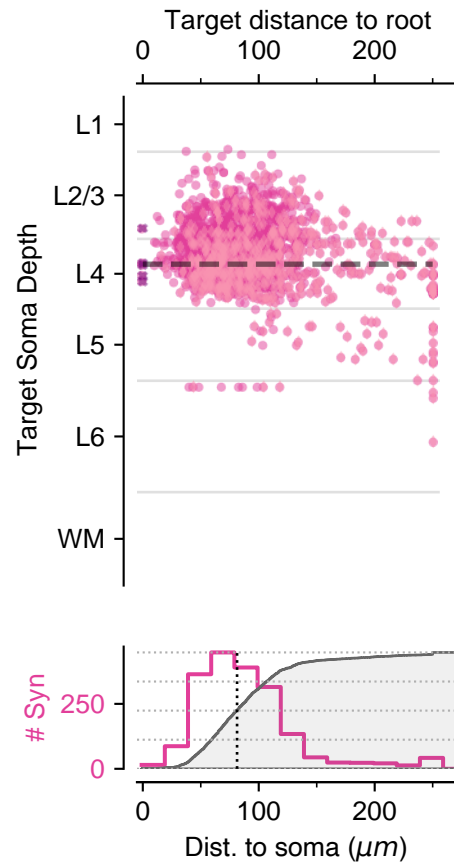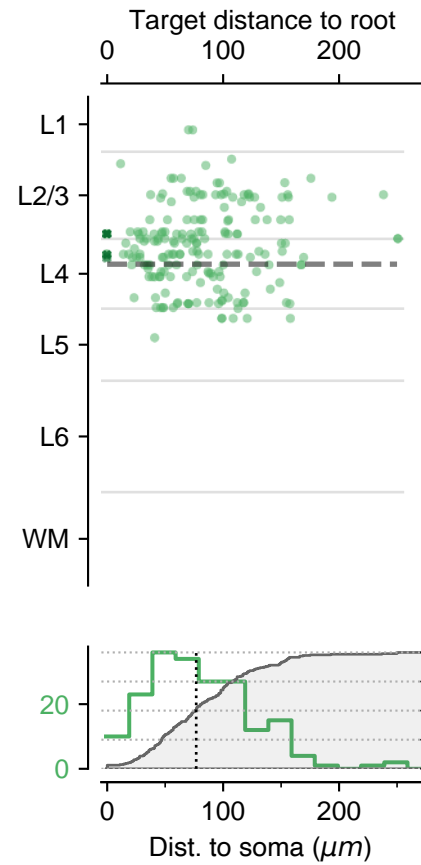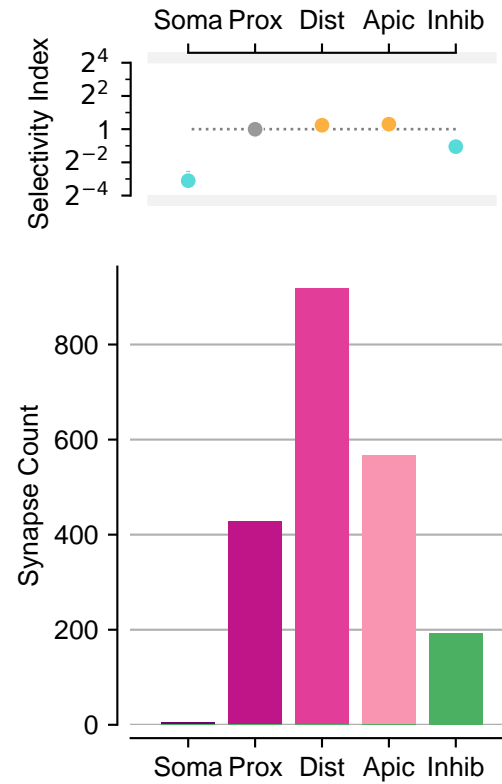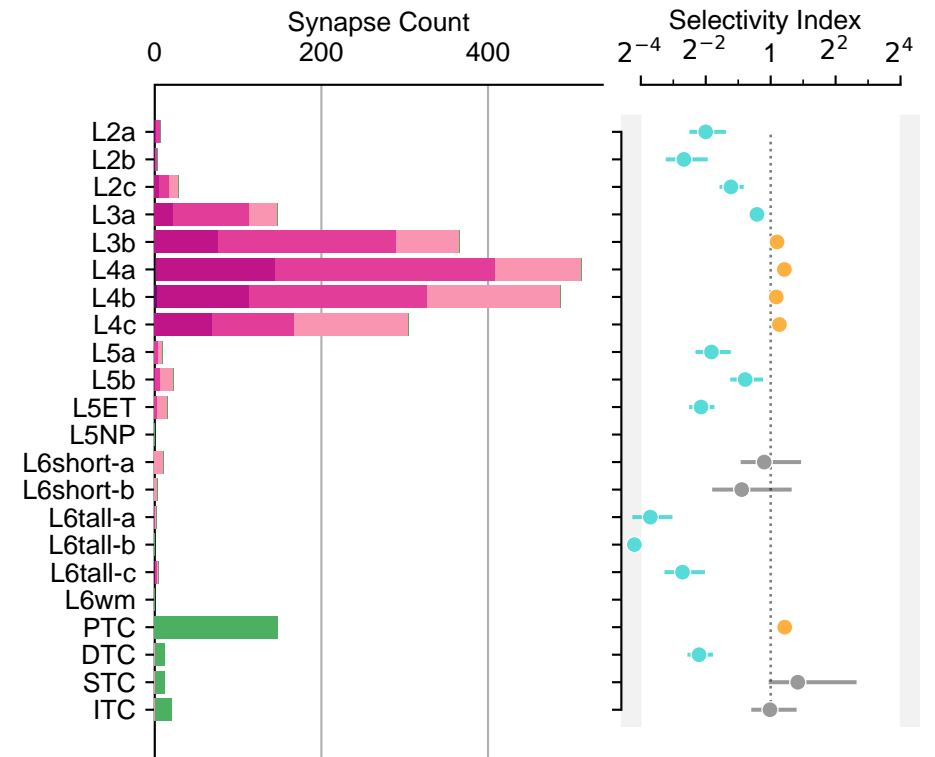



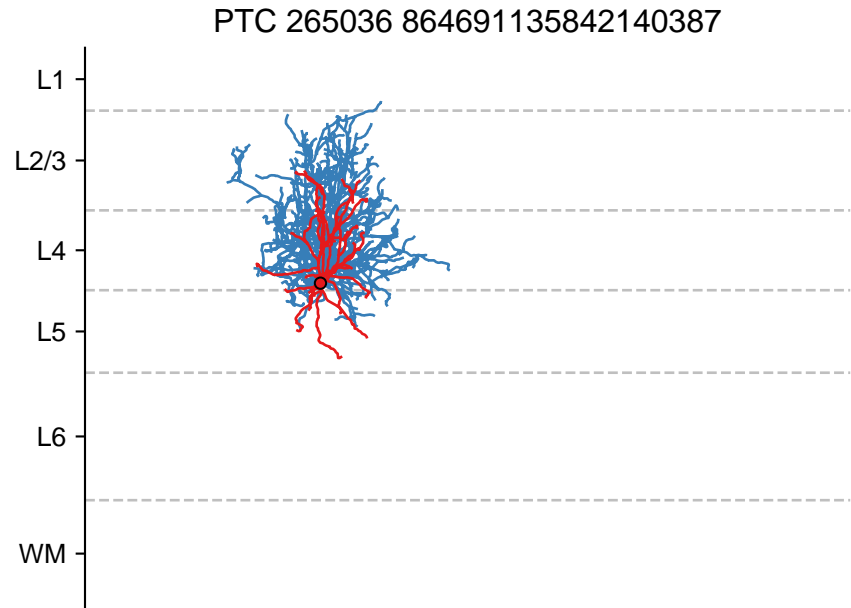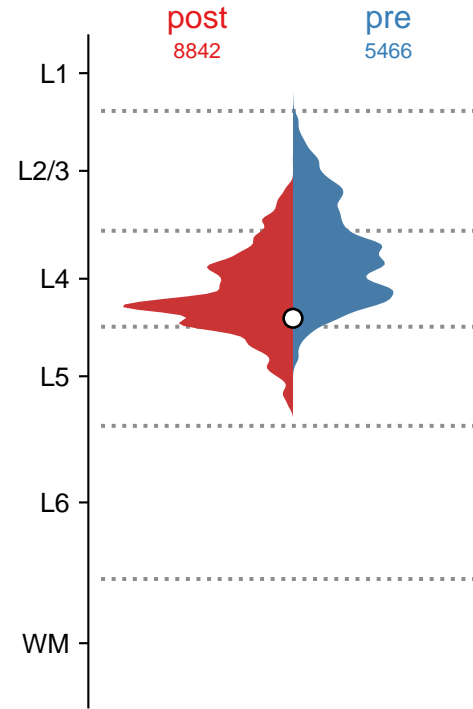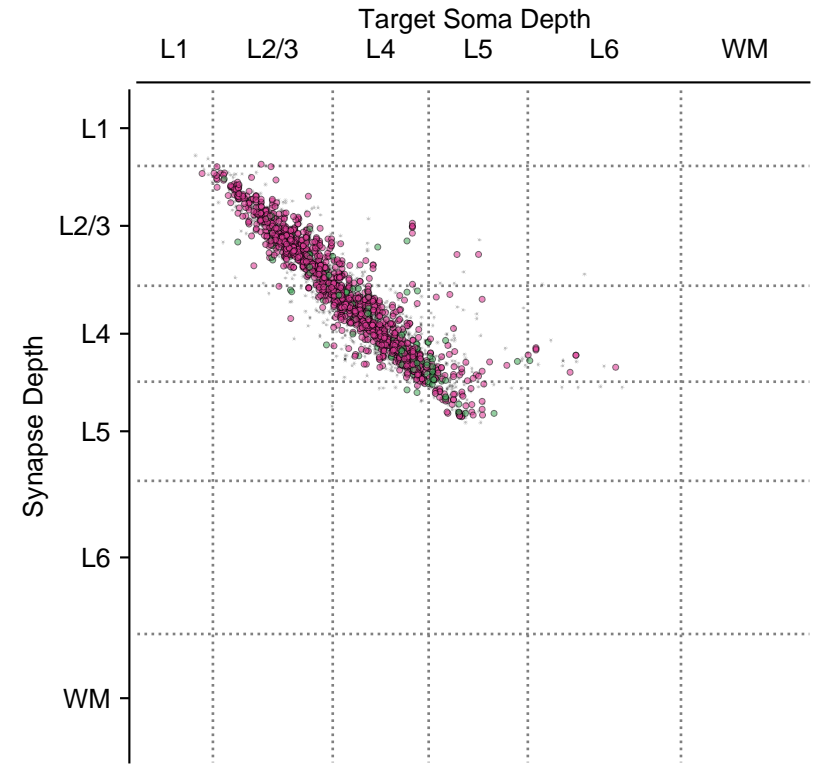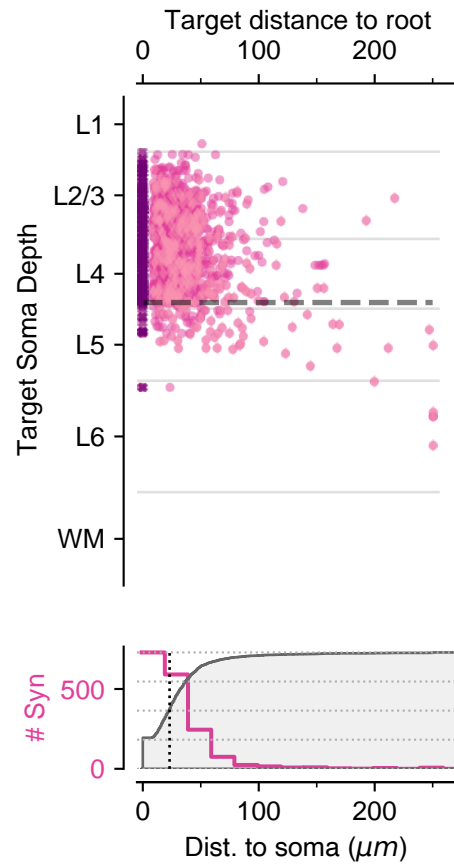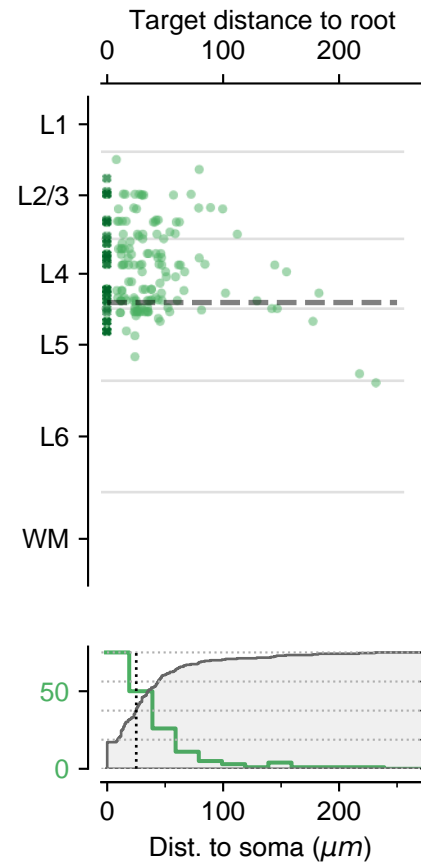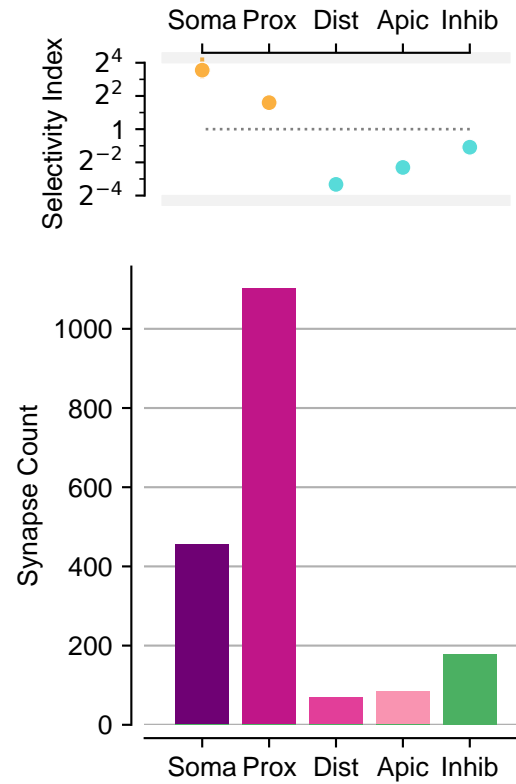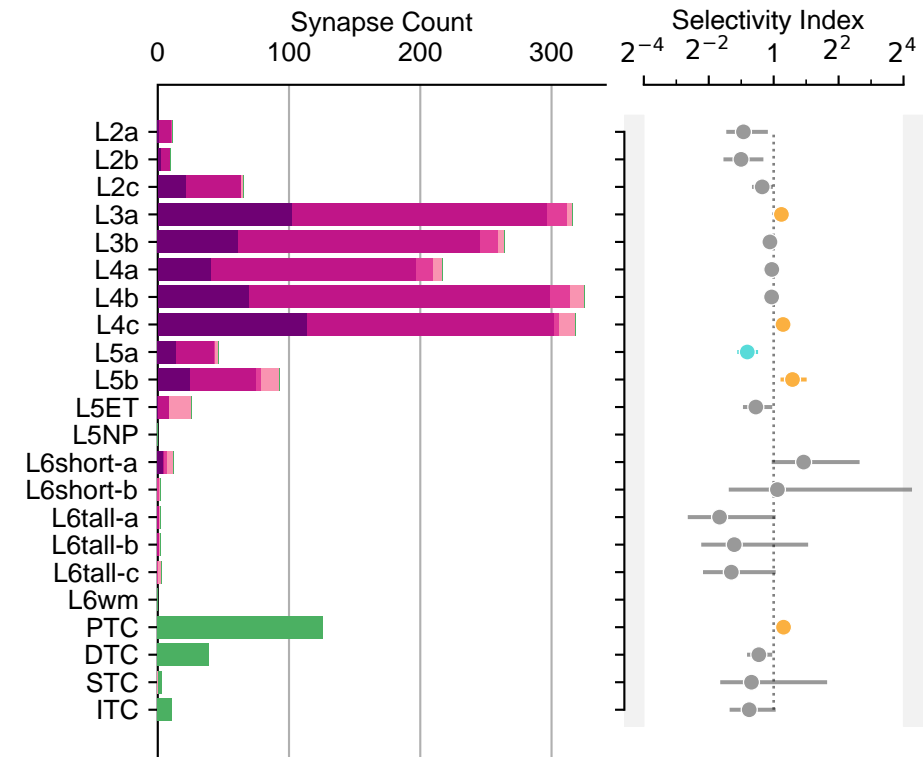

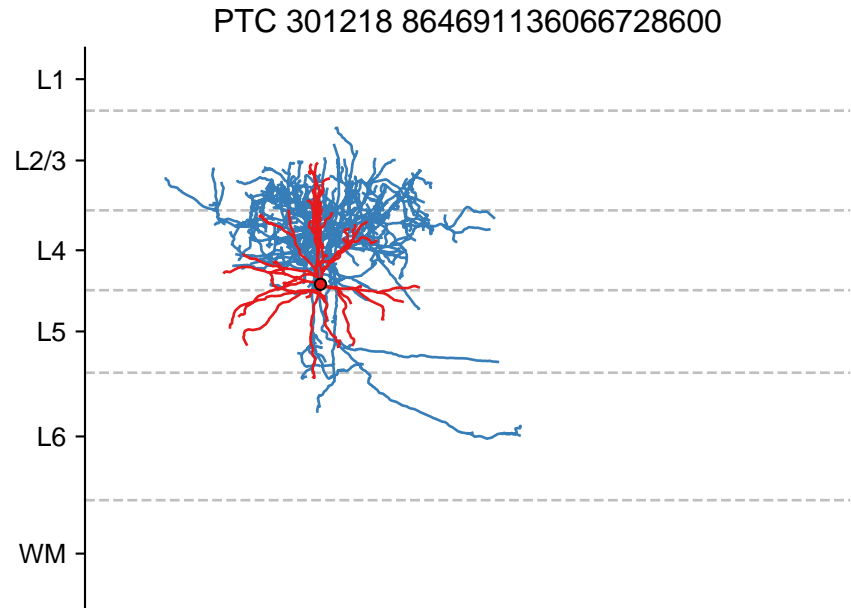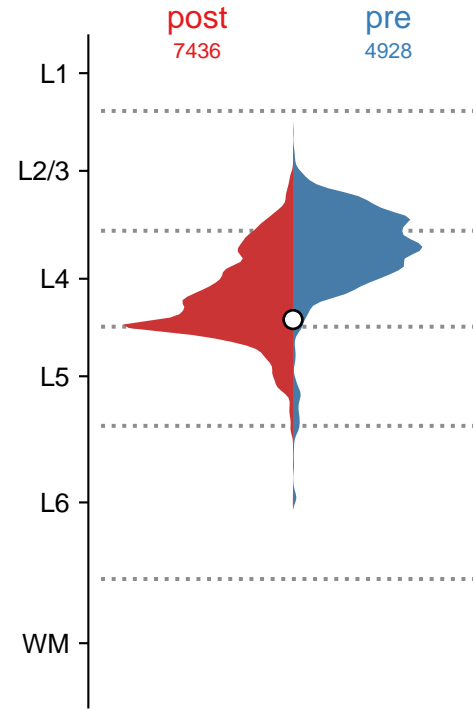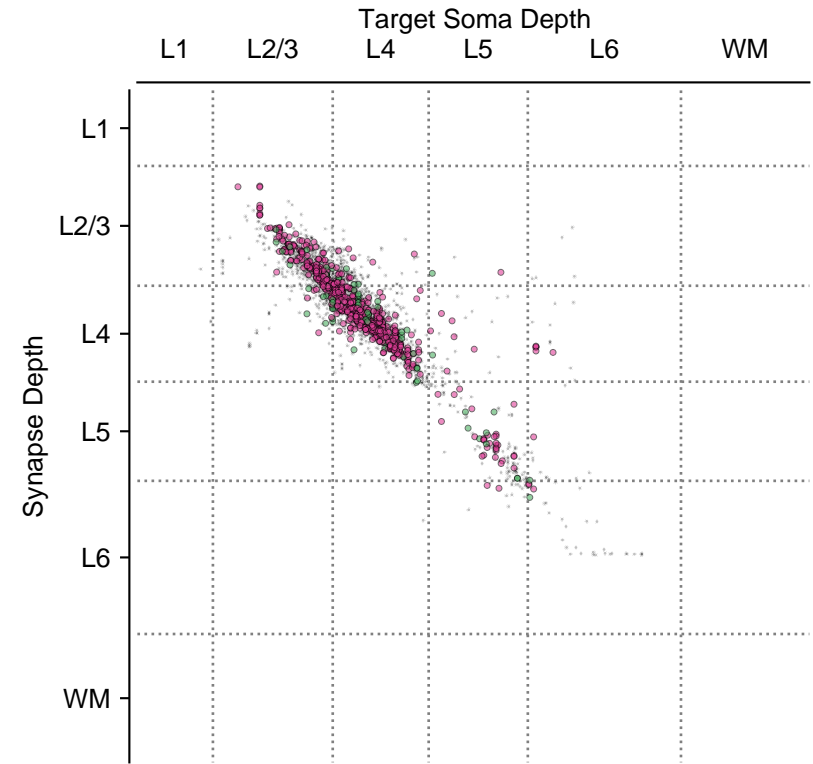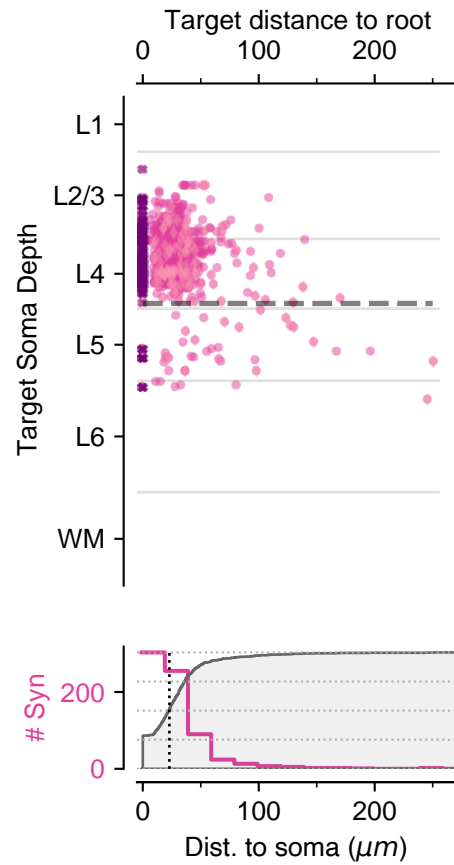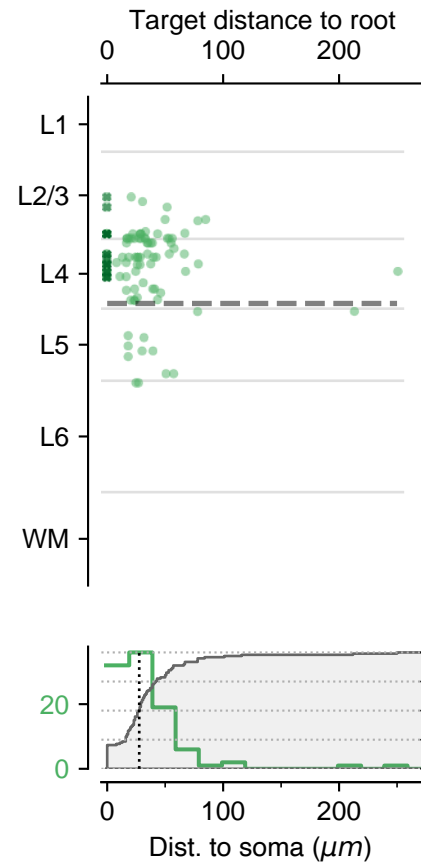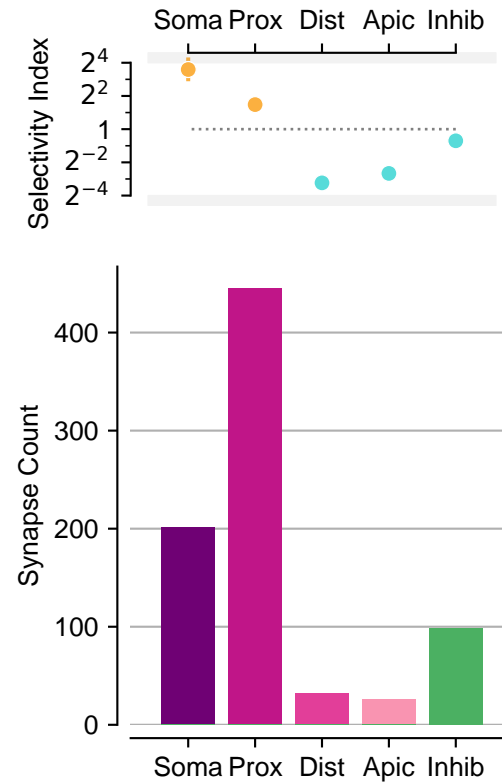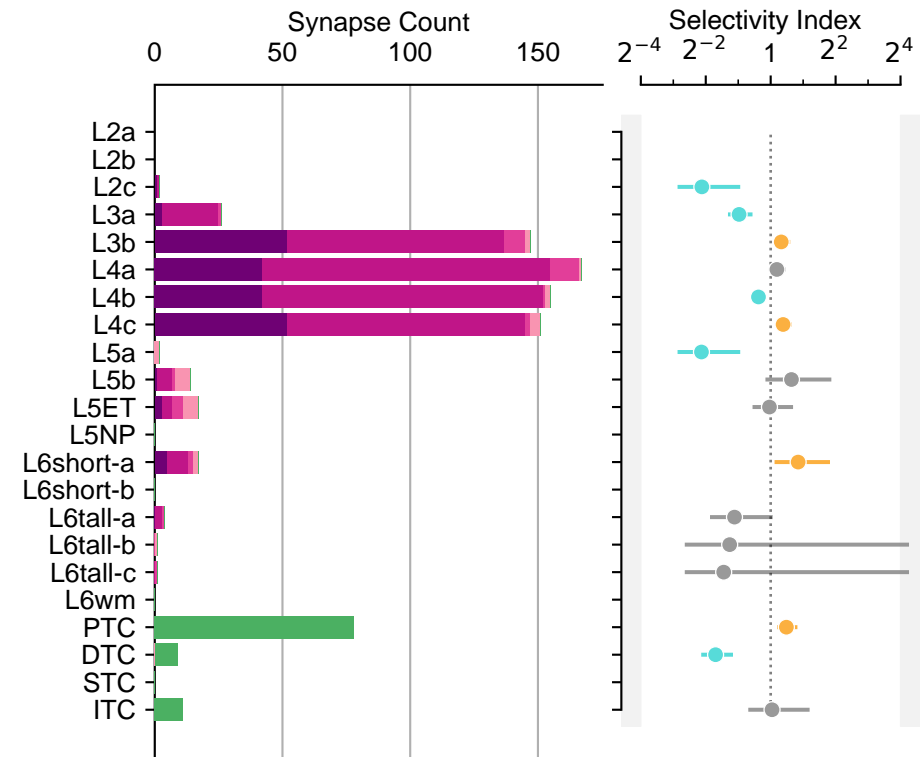

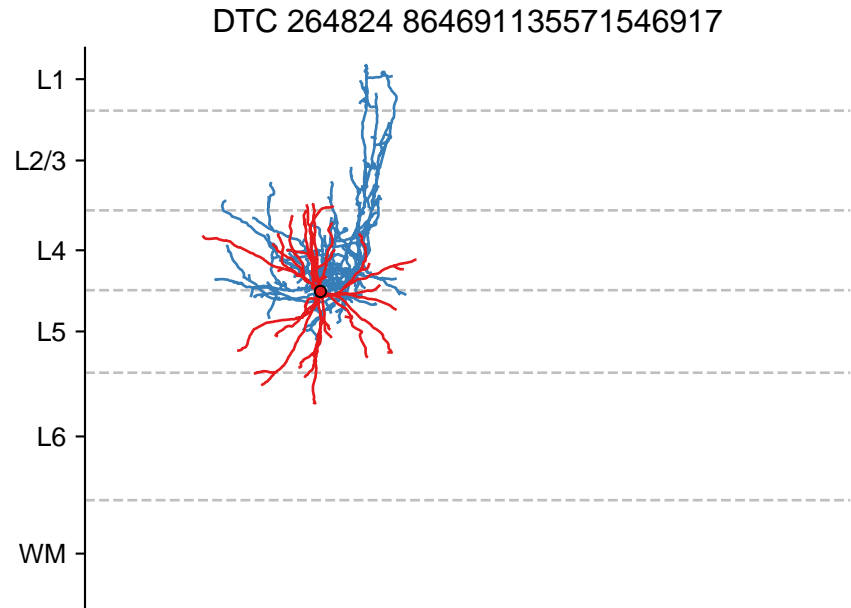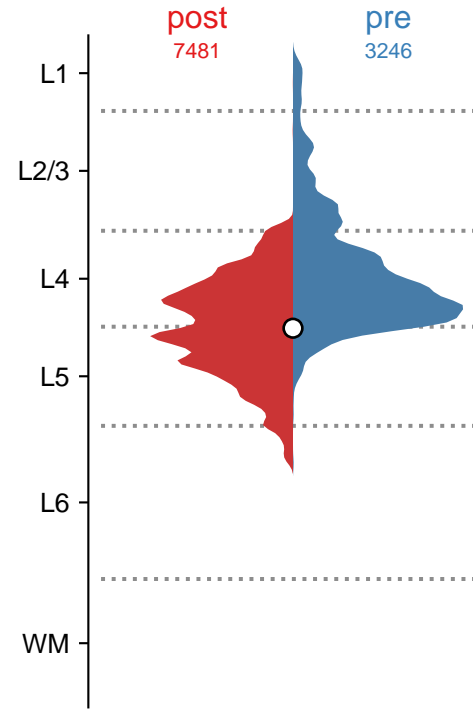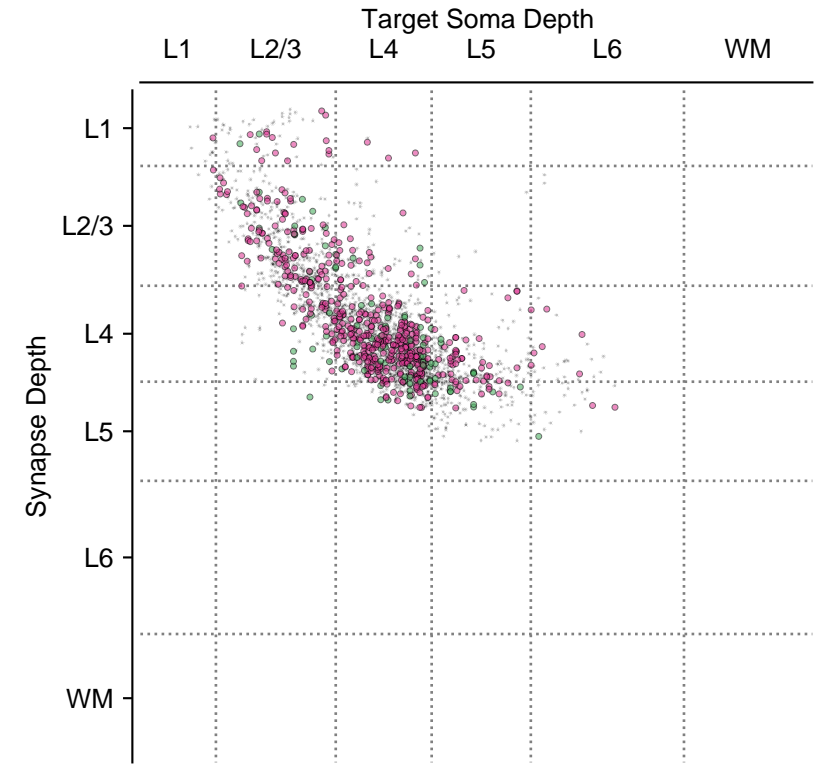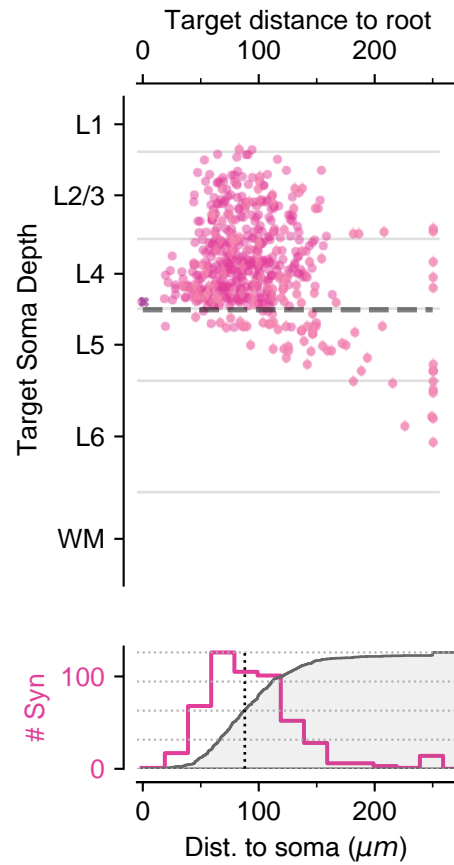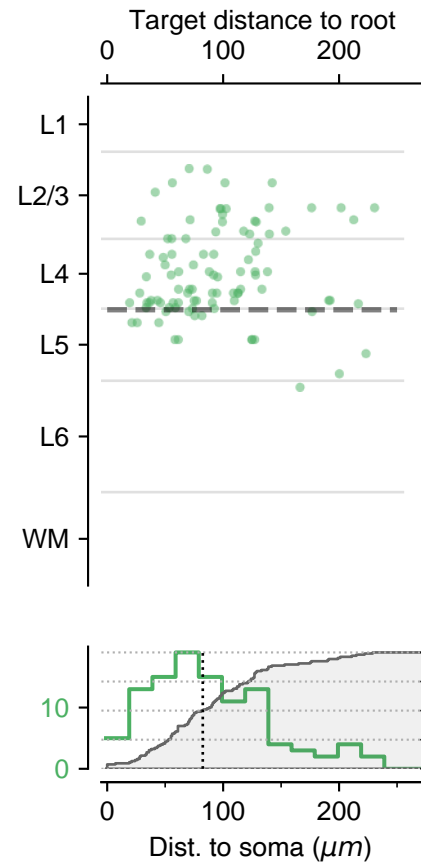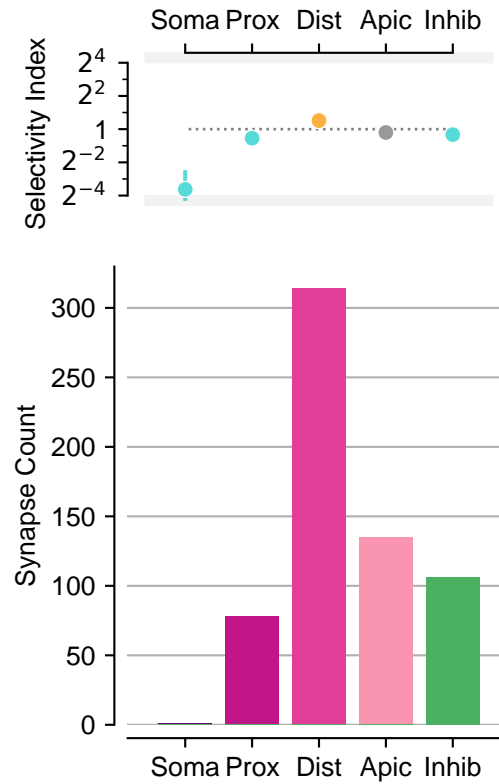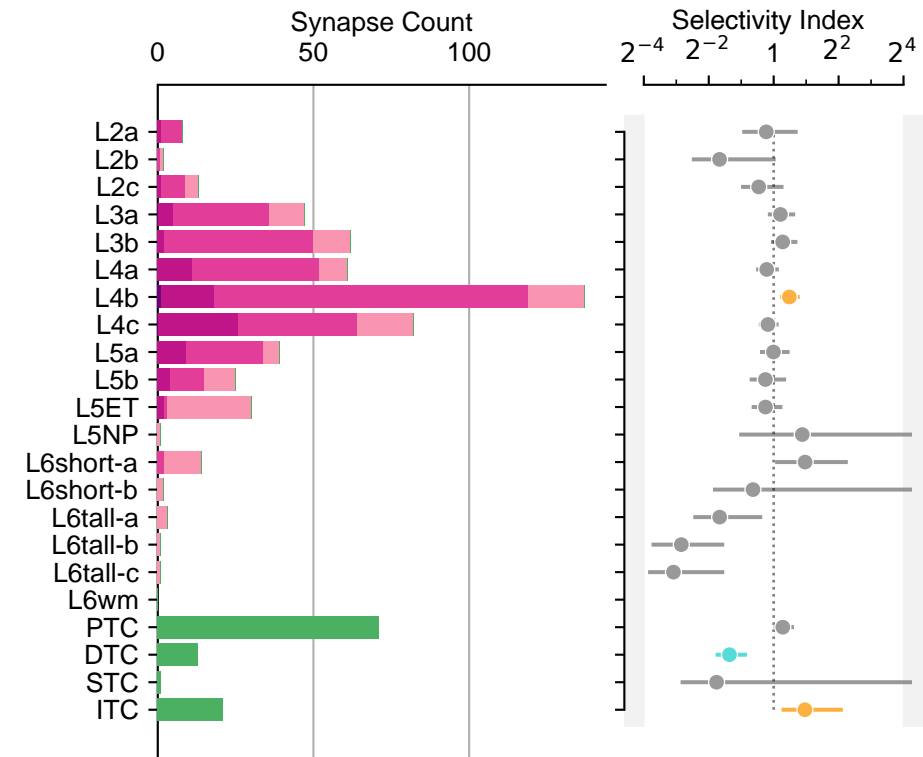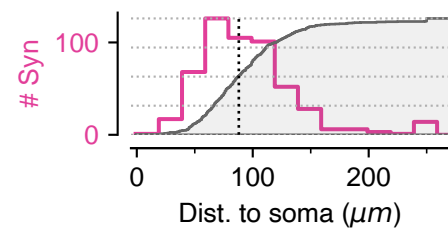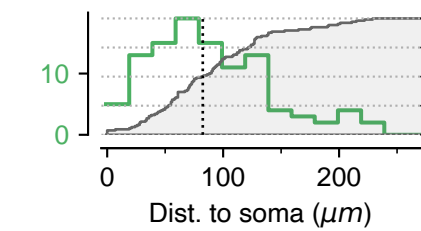

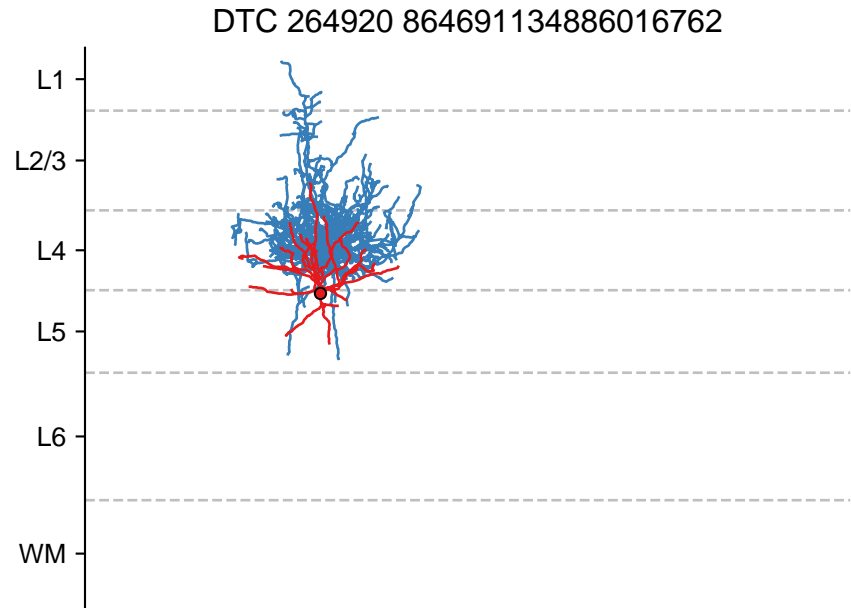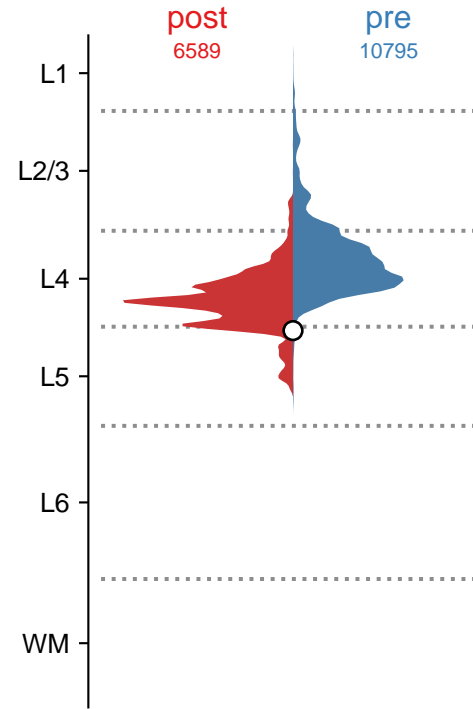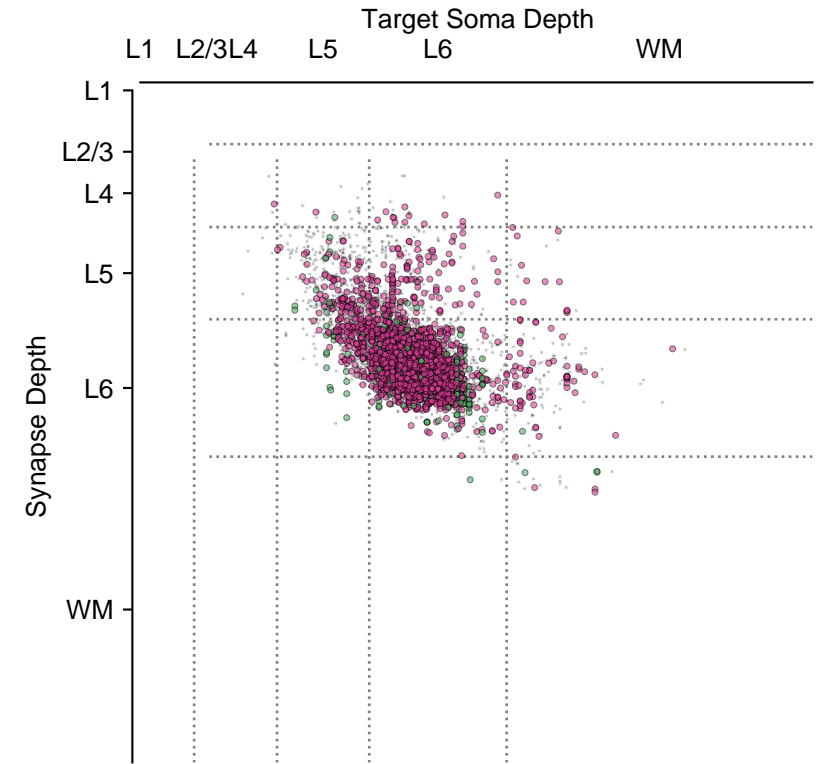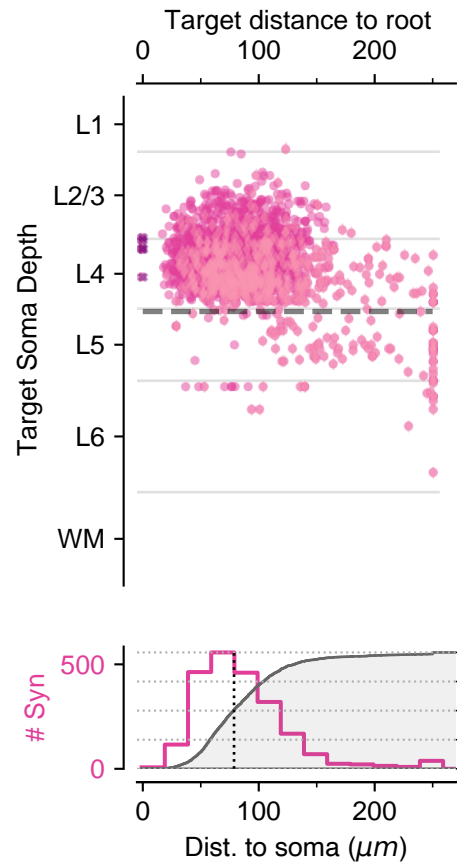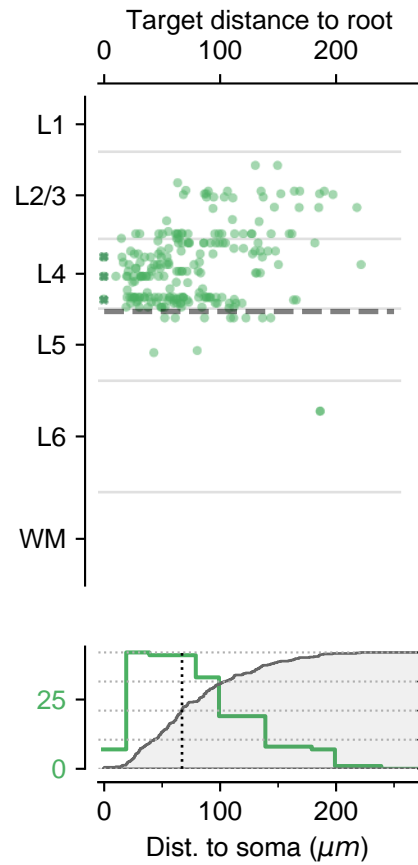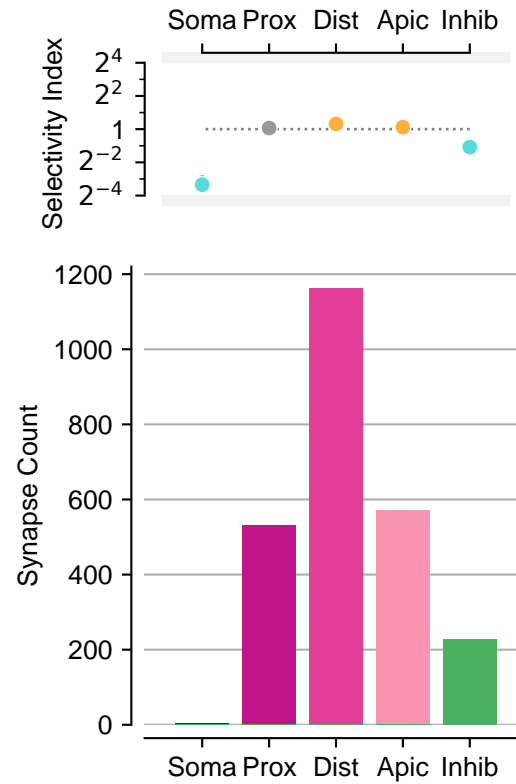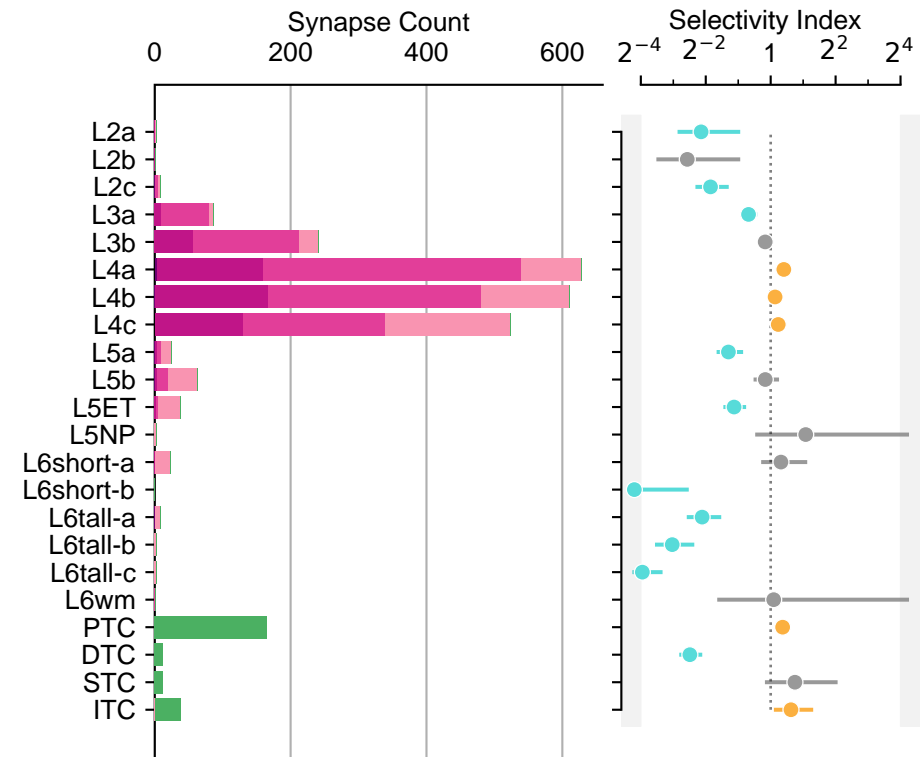

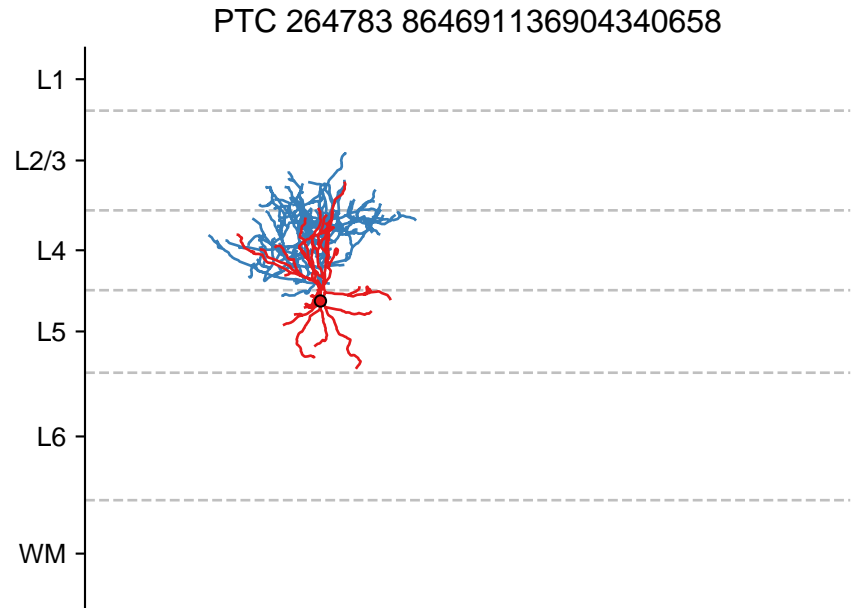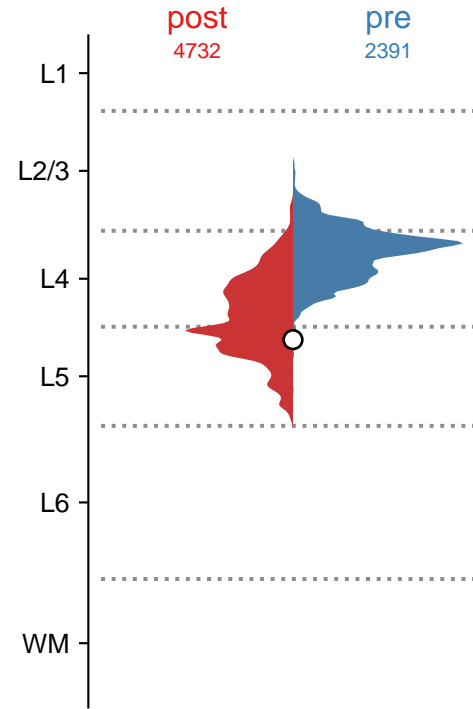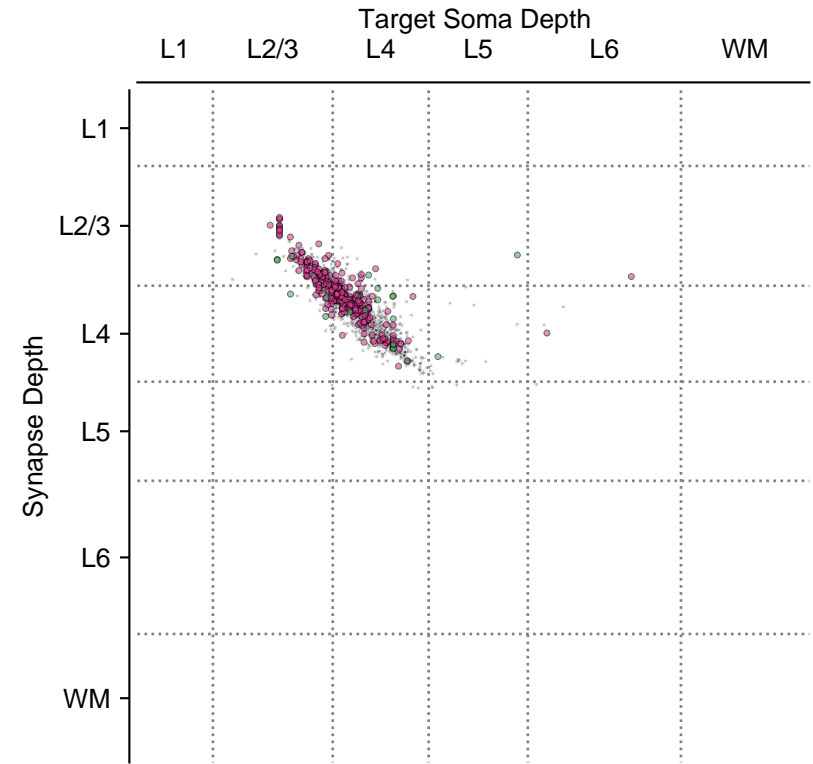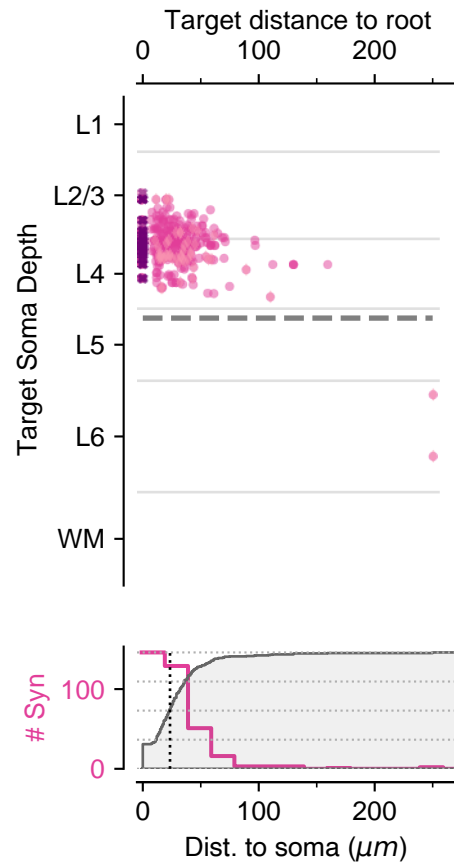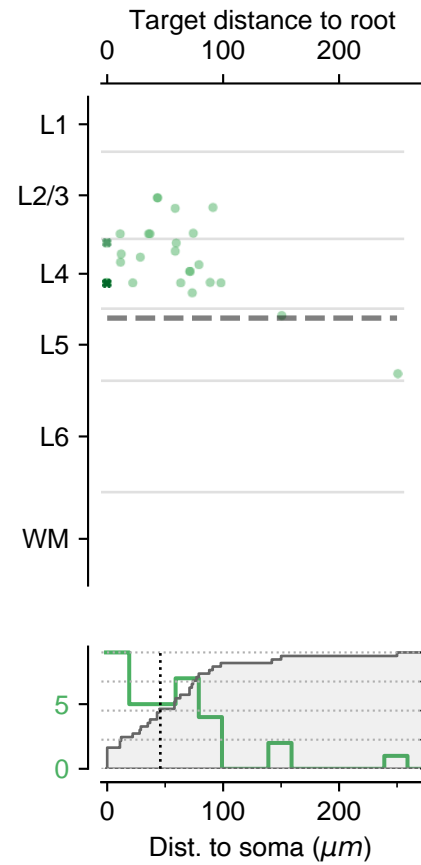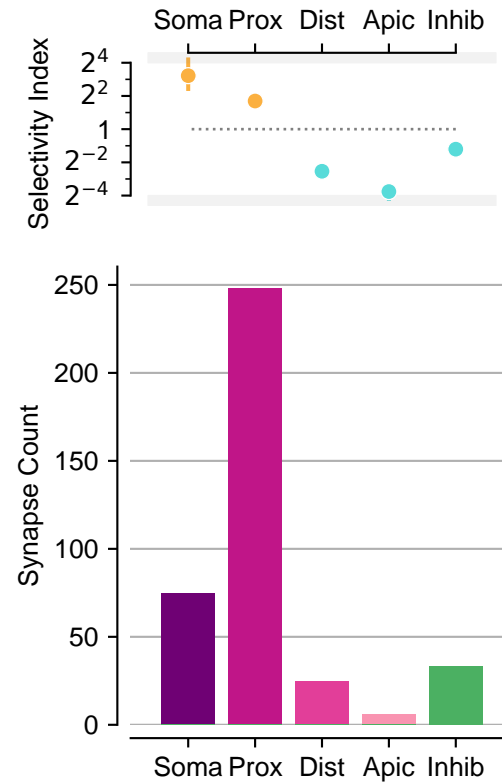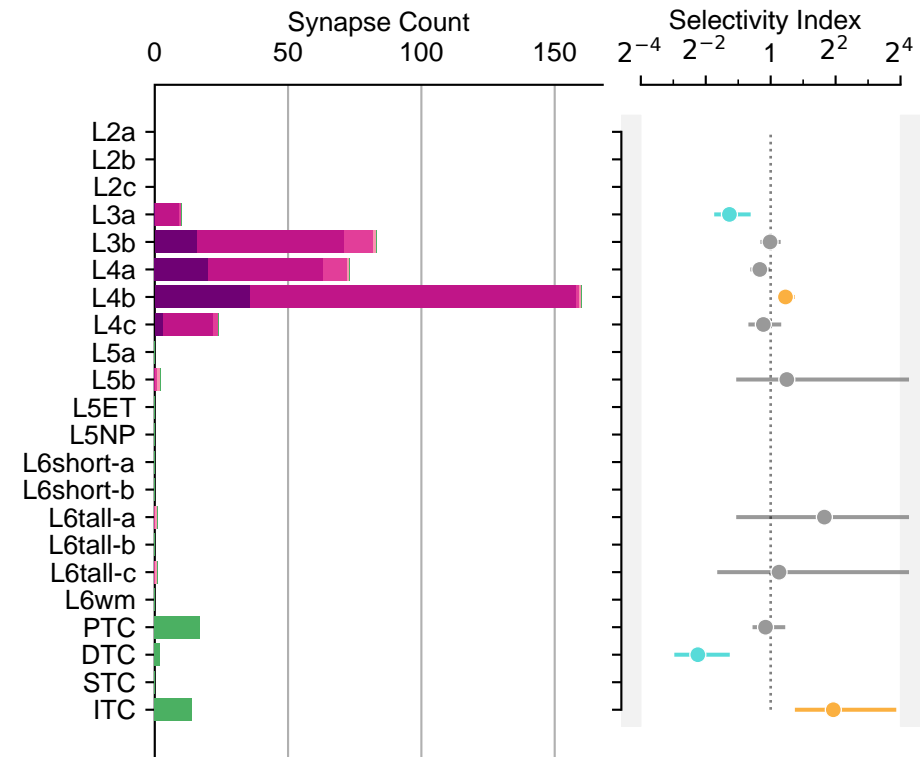

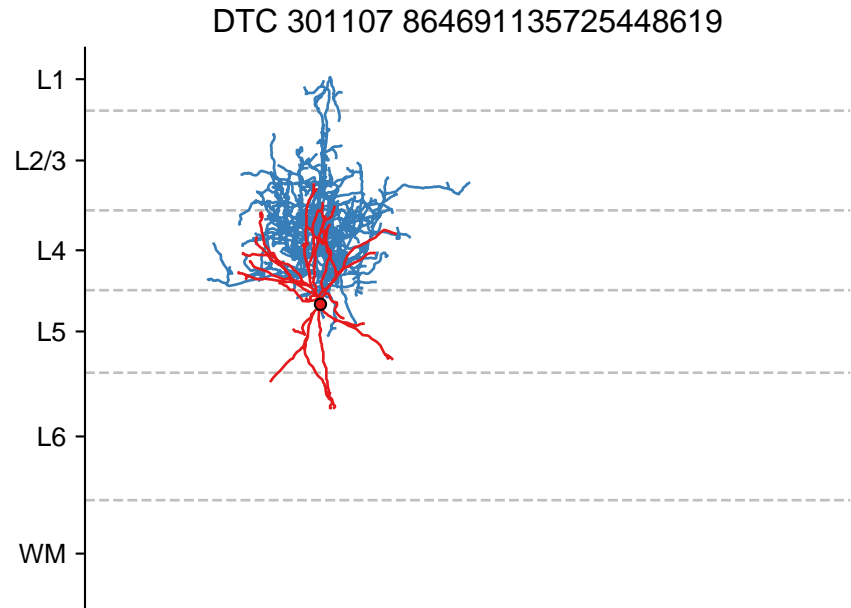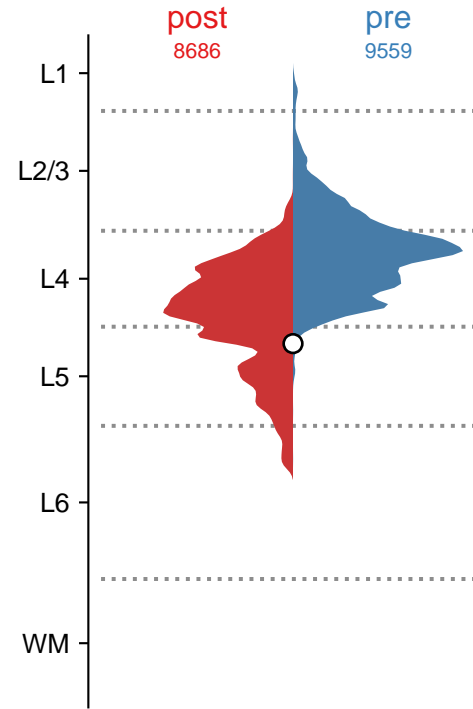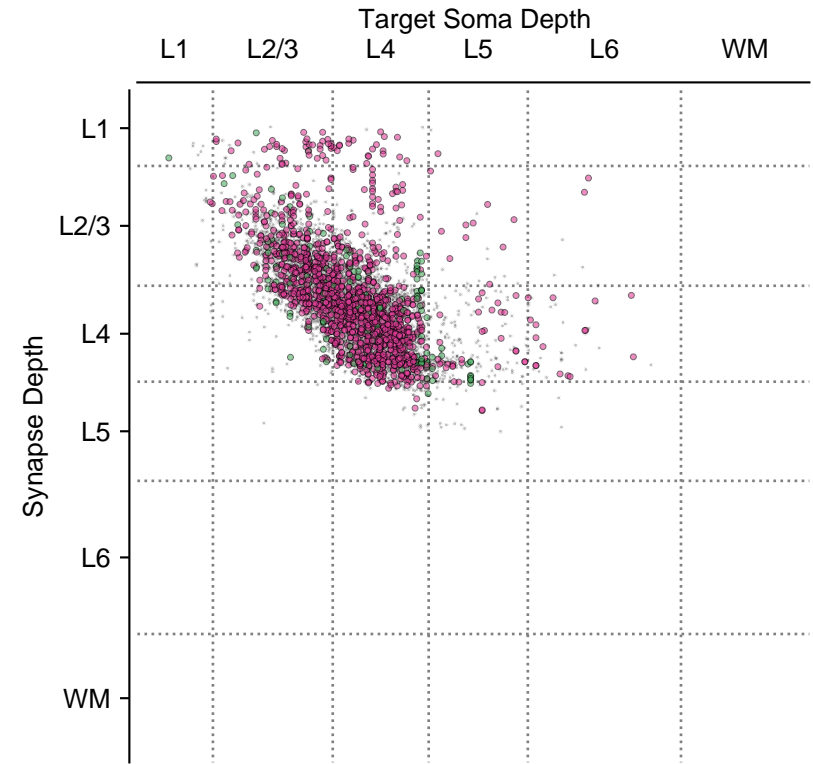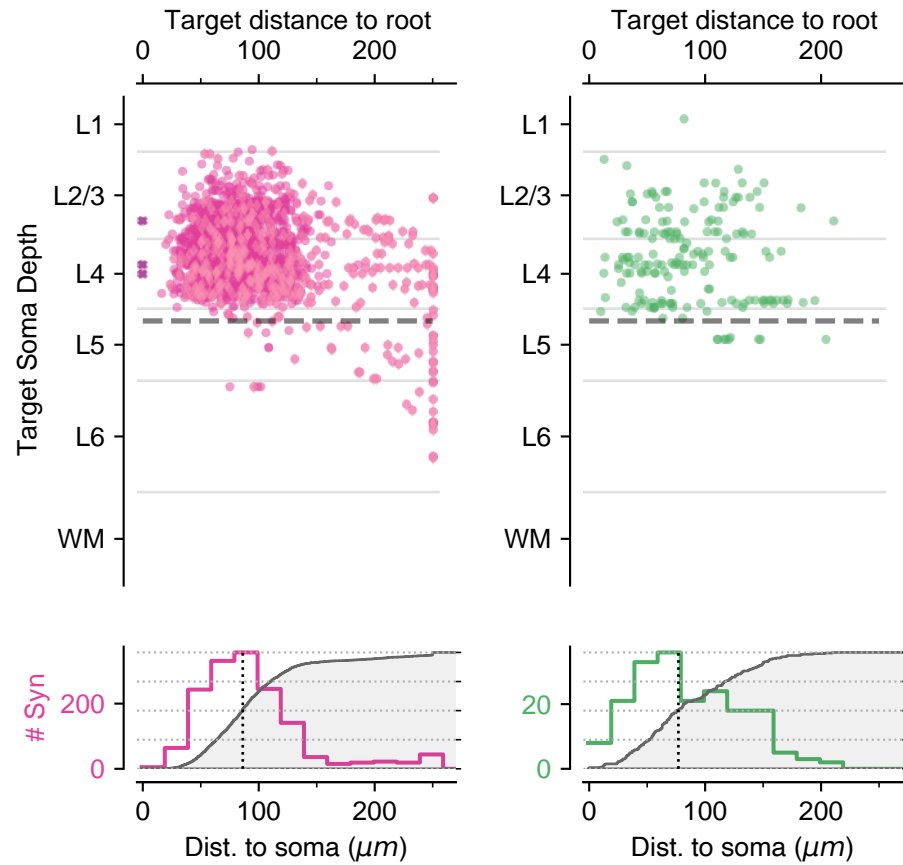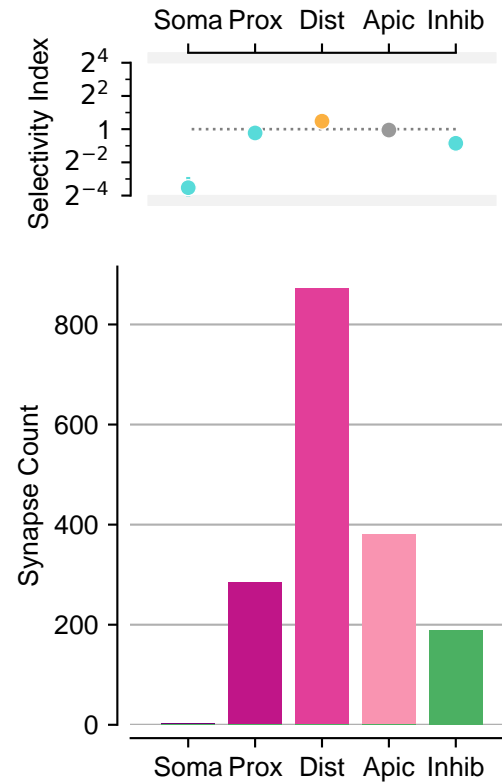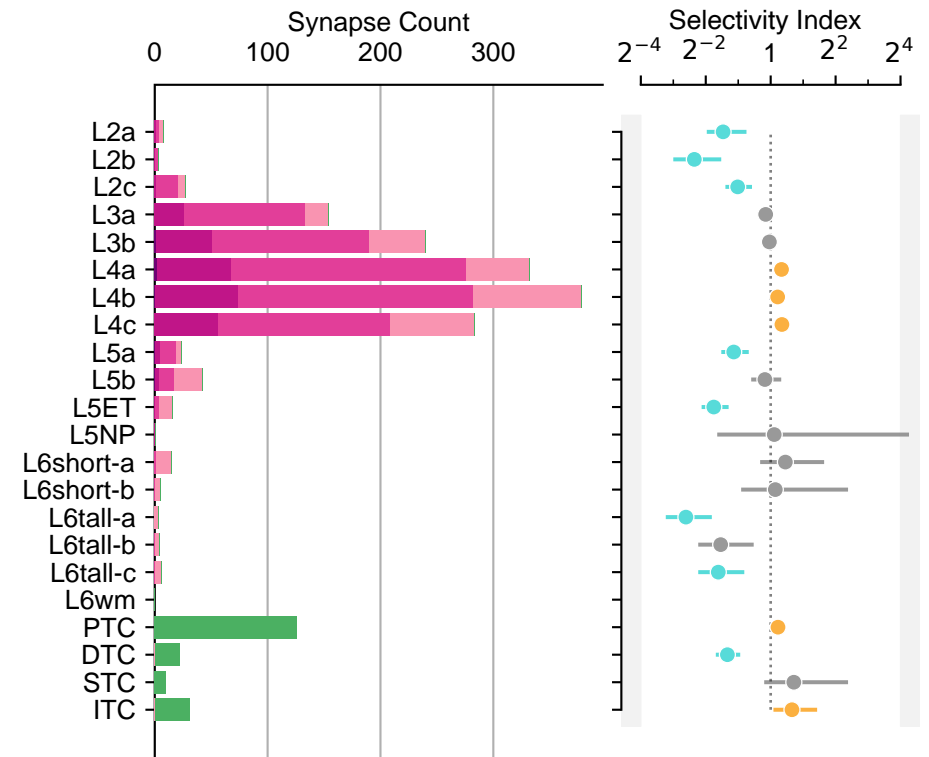

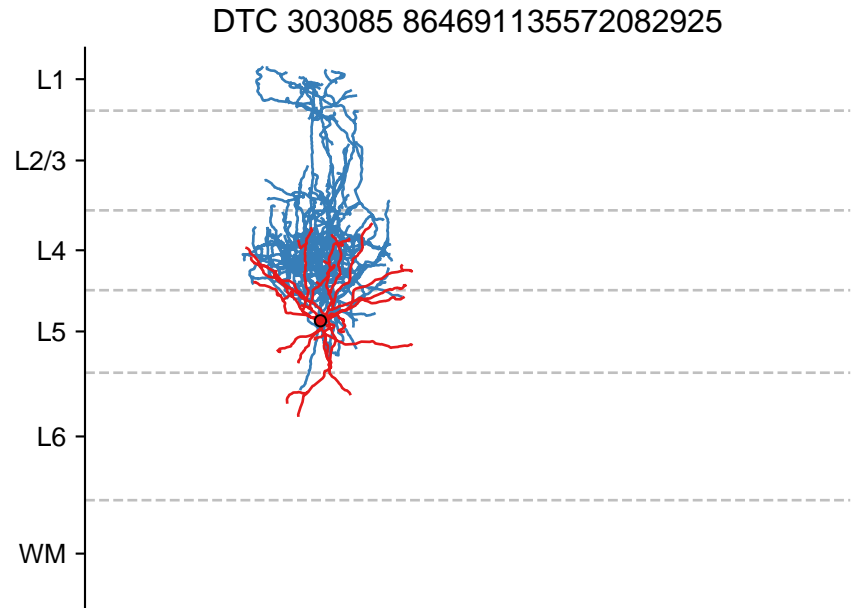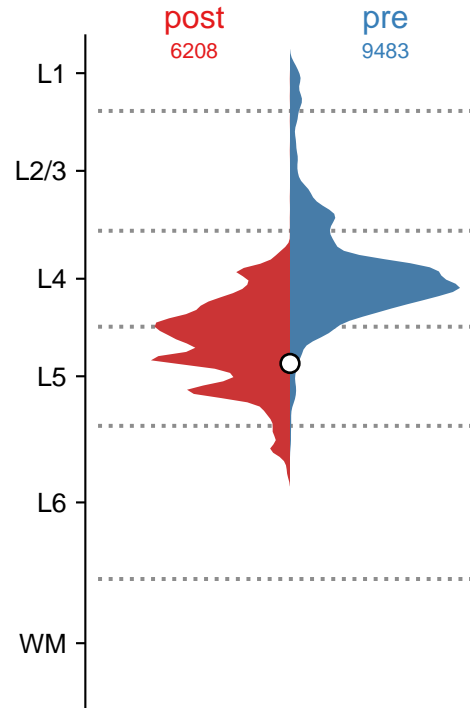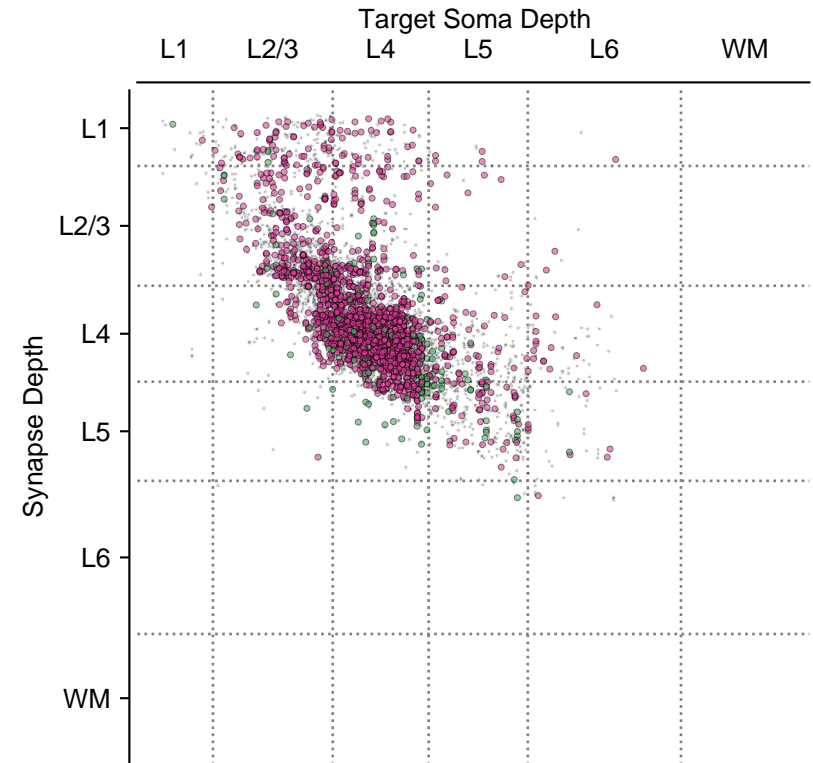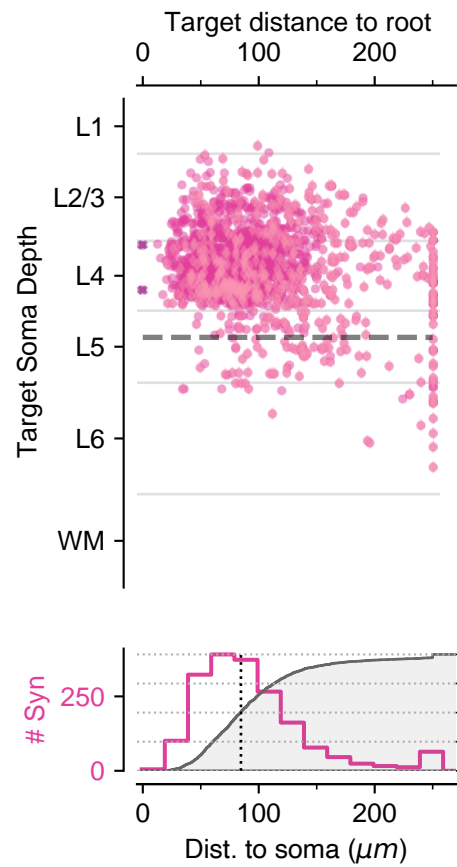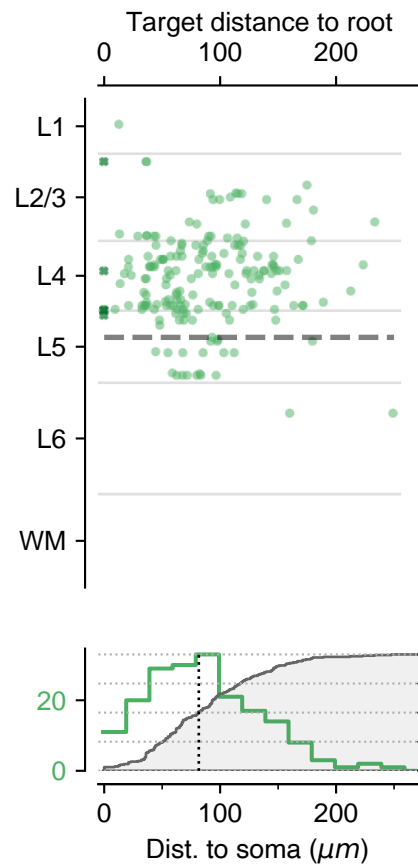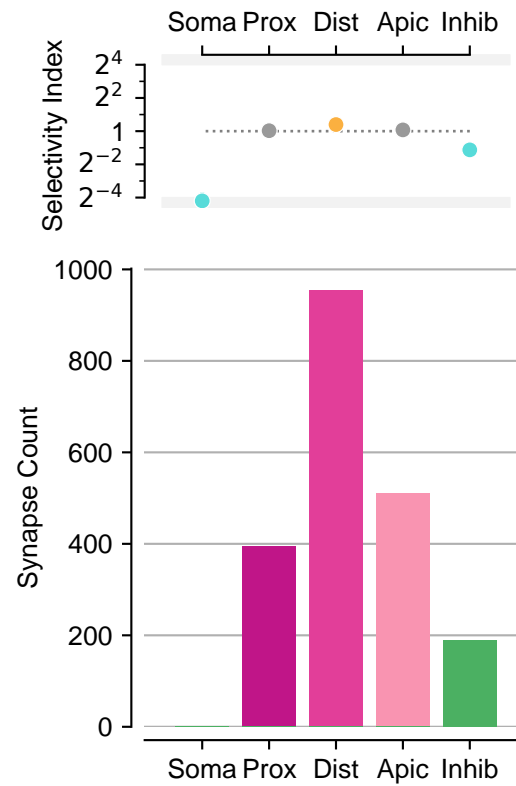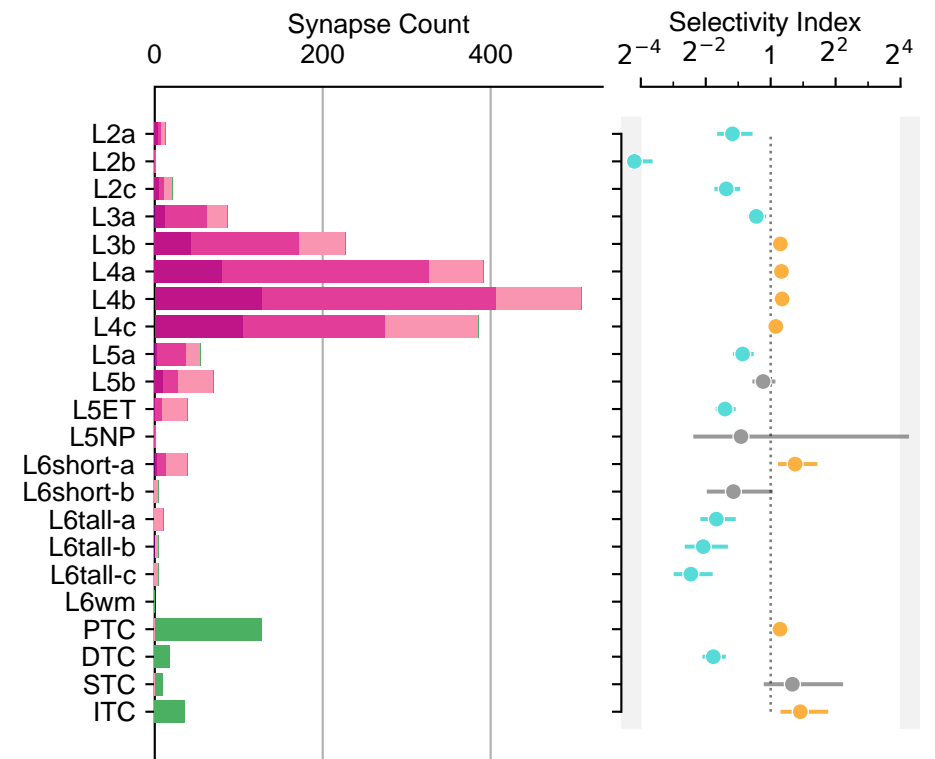

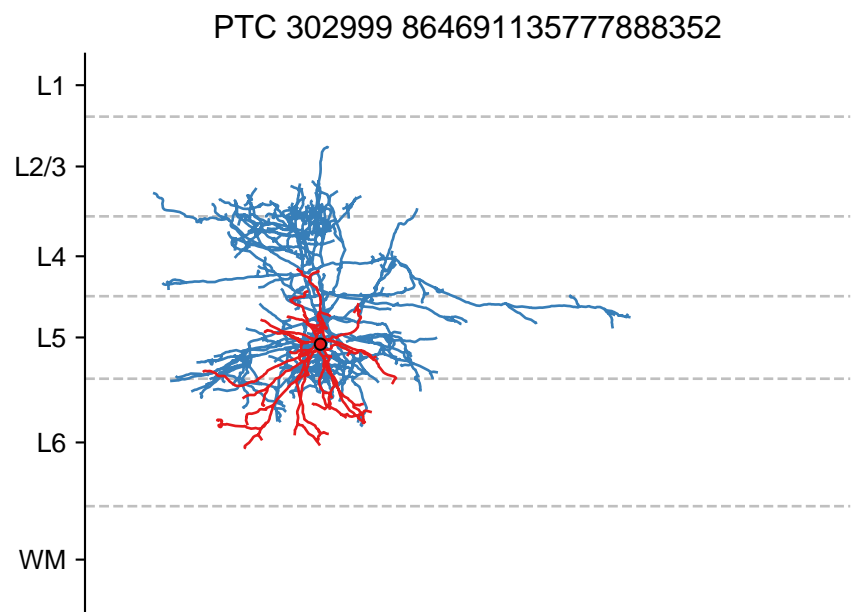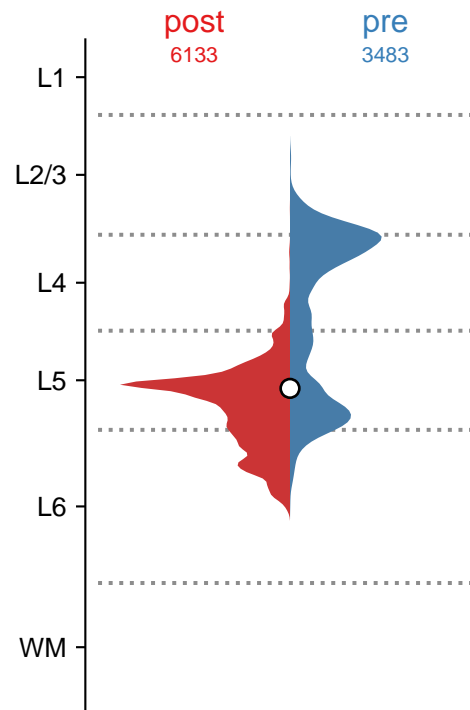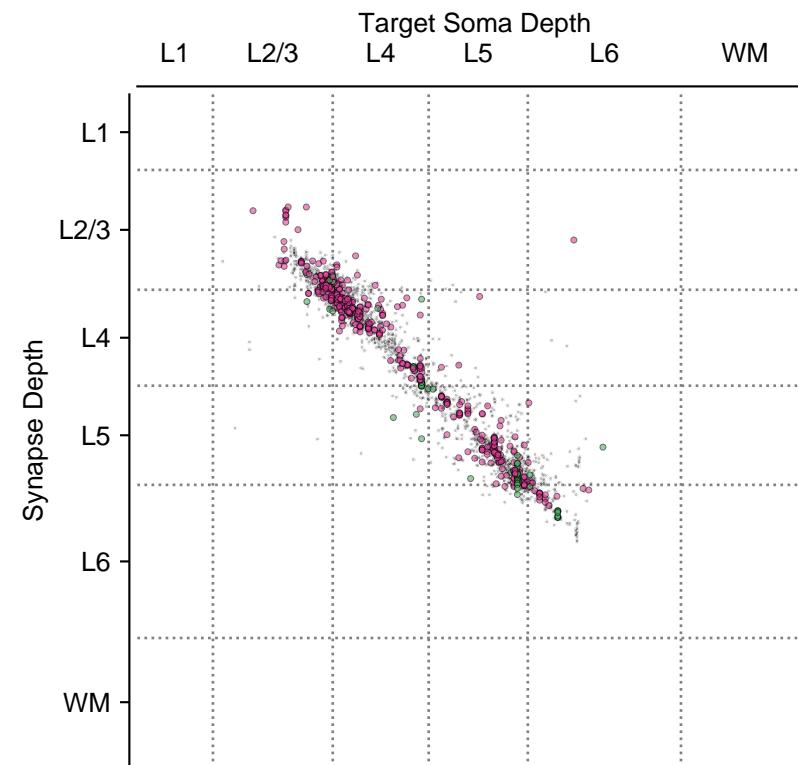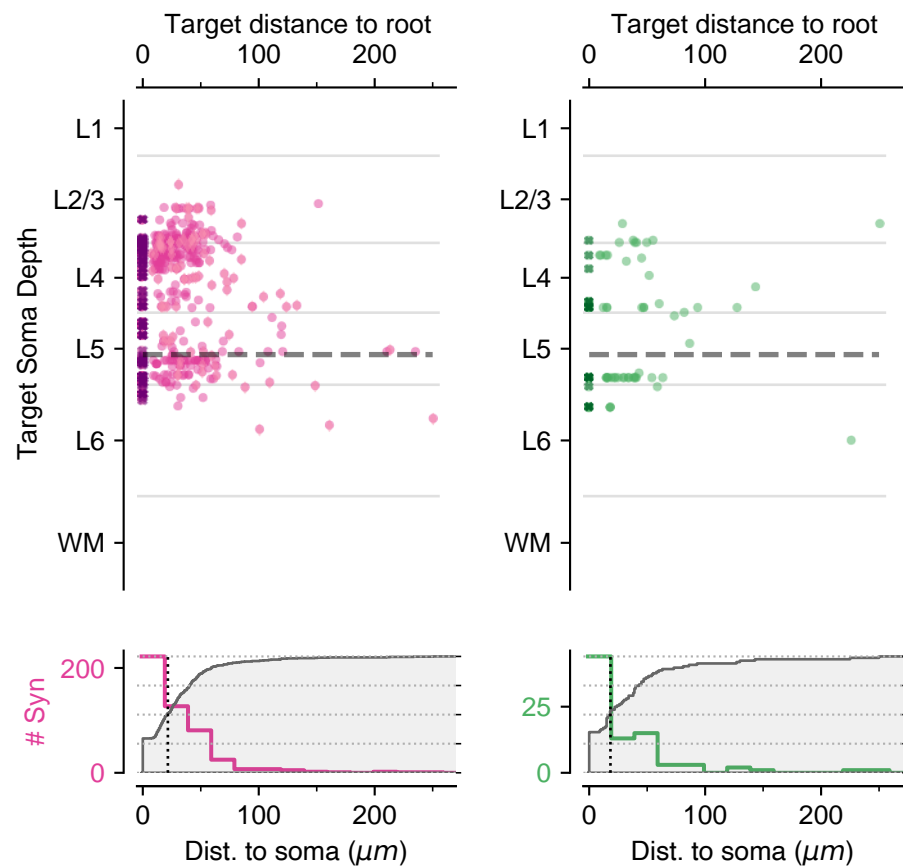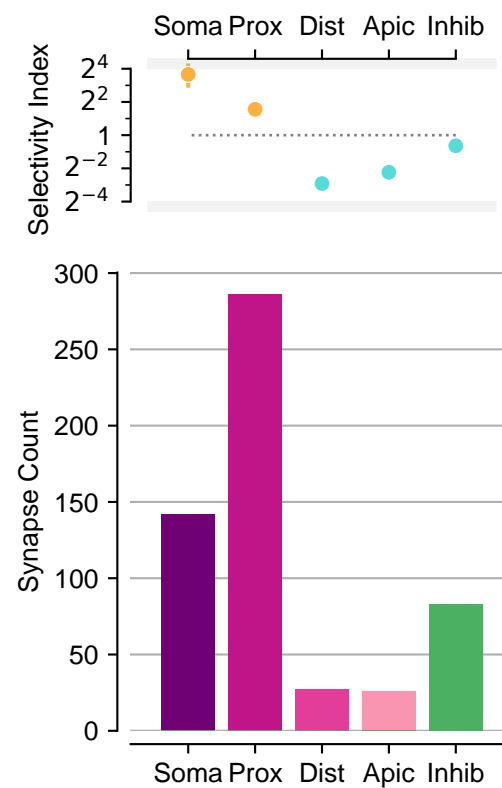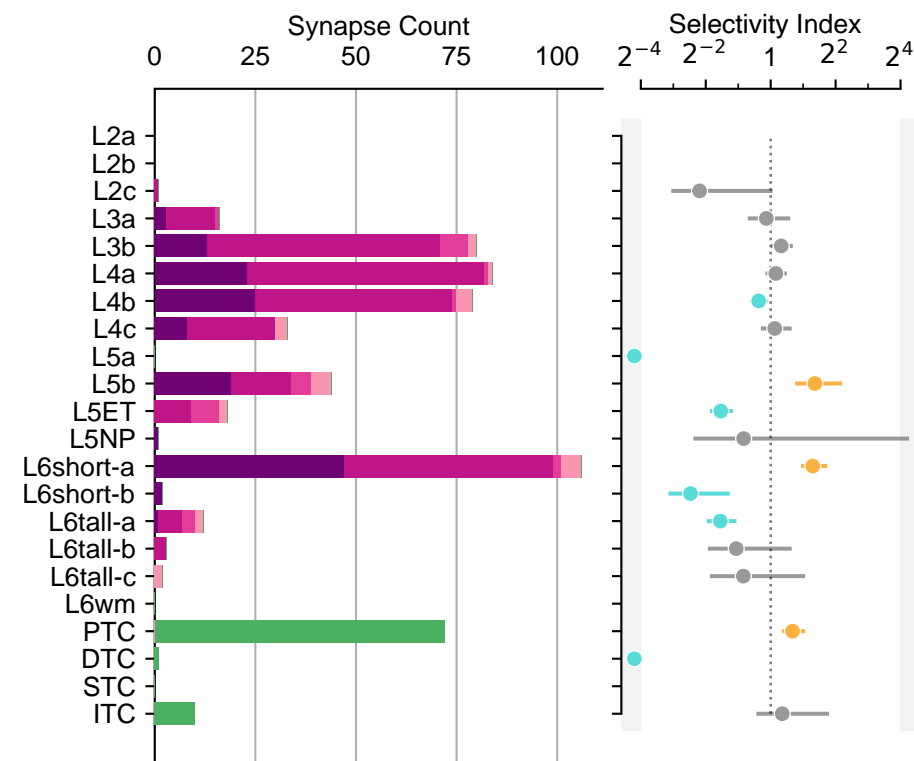



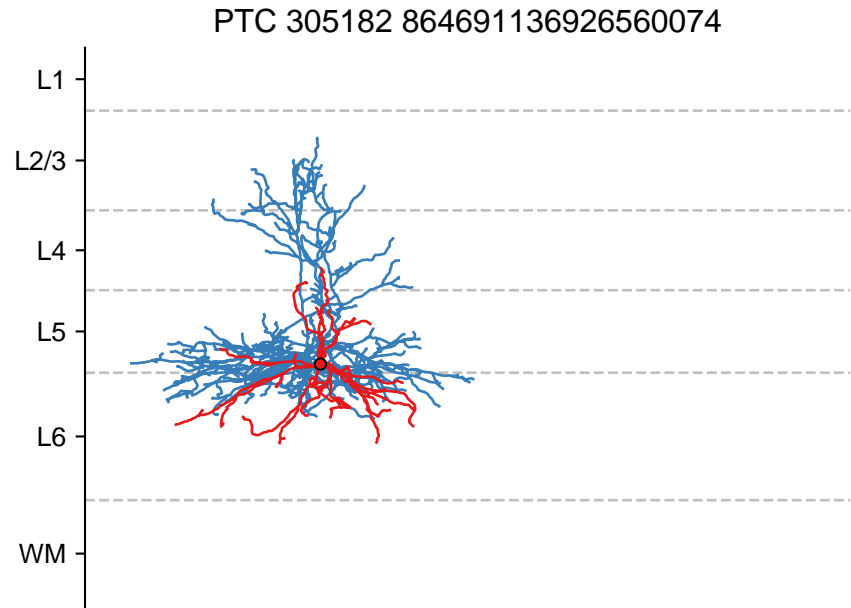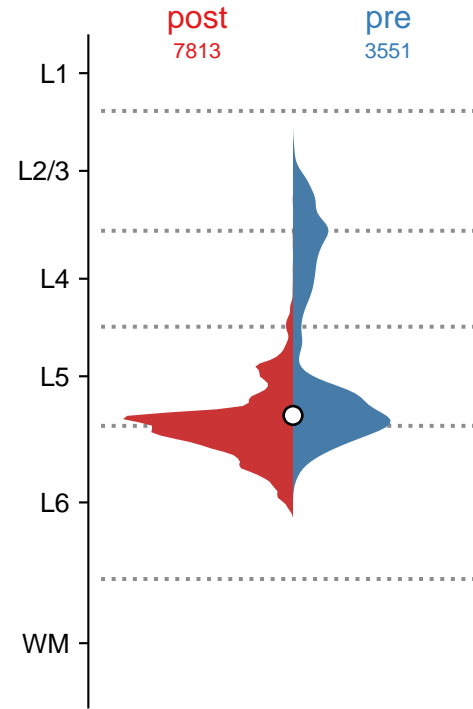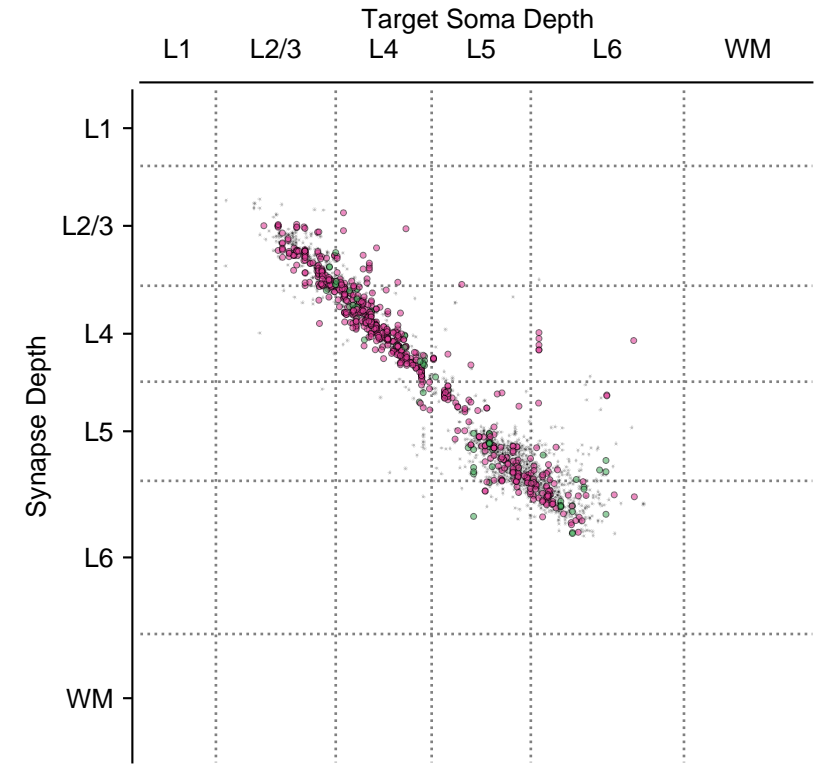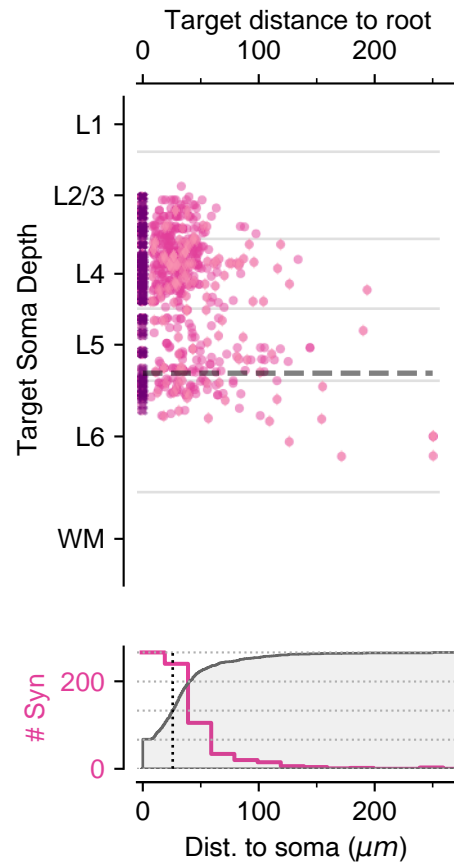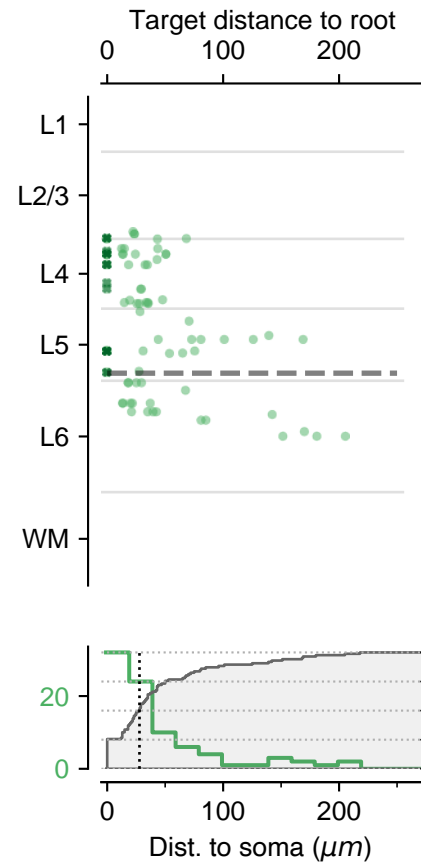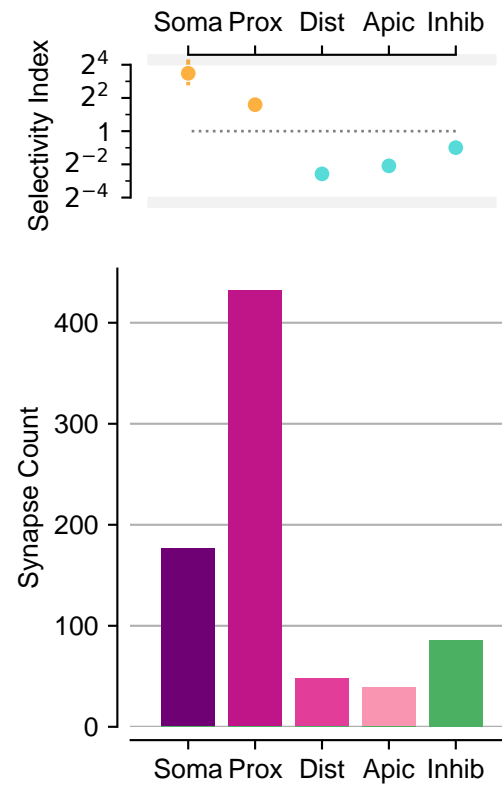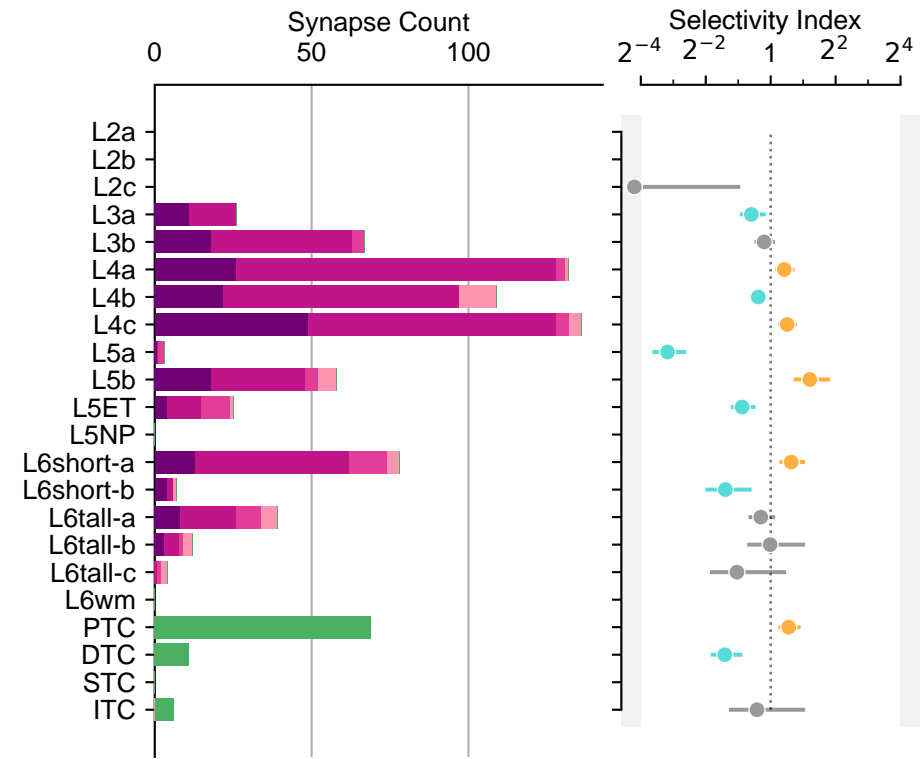

# Motif Group 6

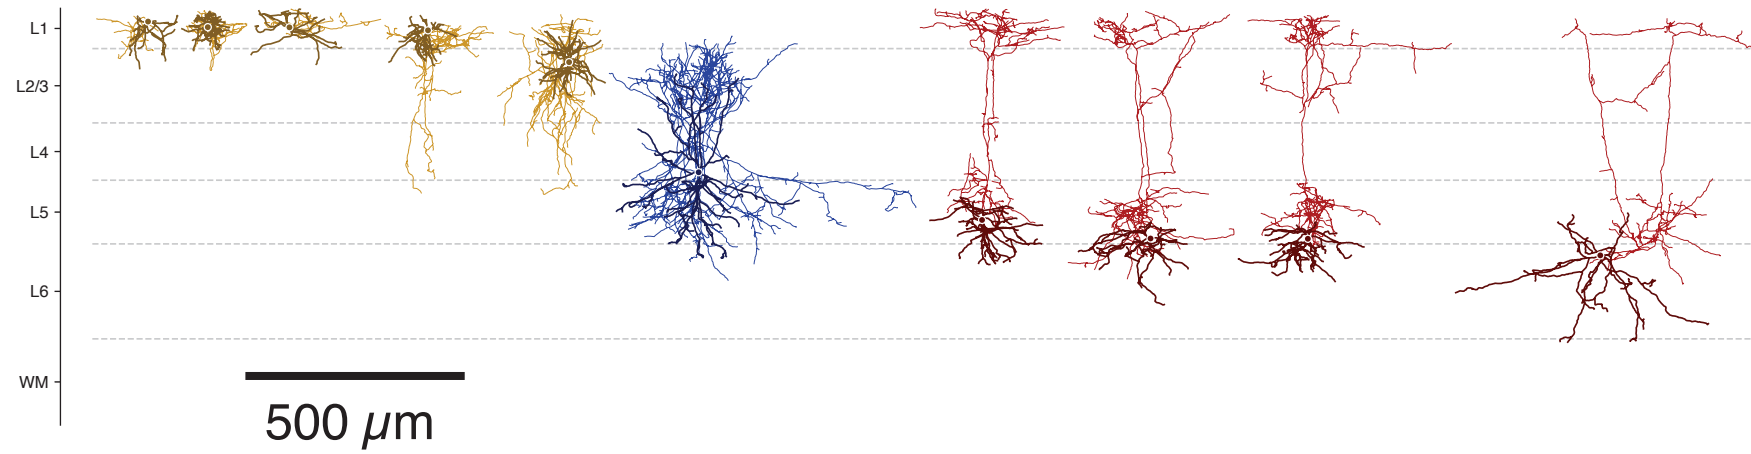

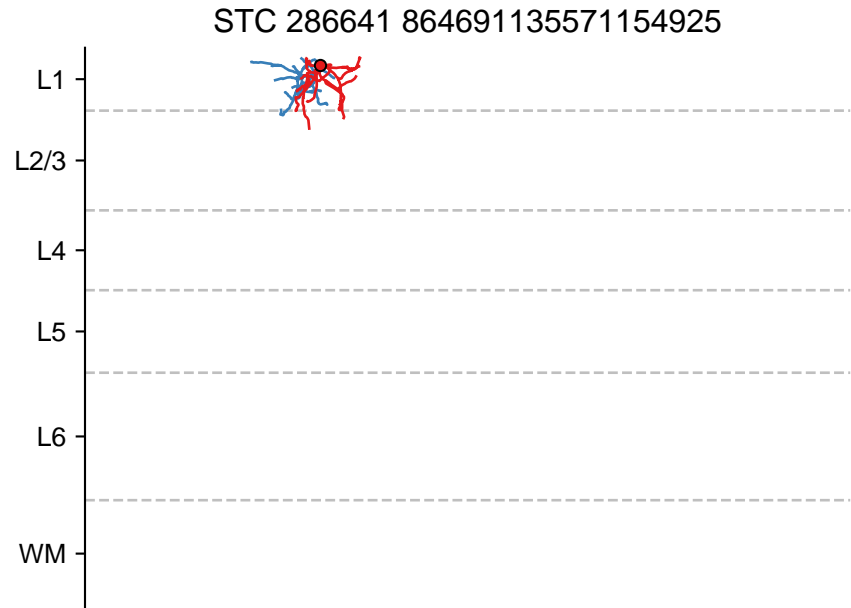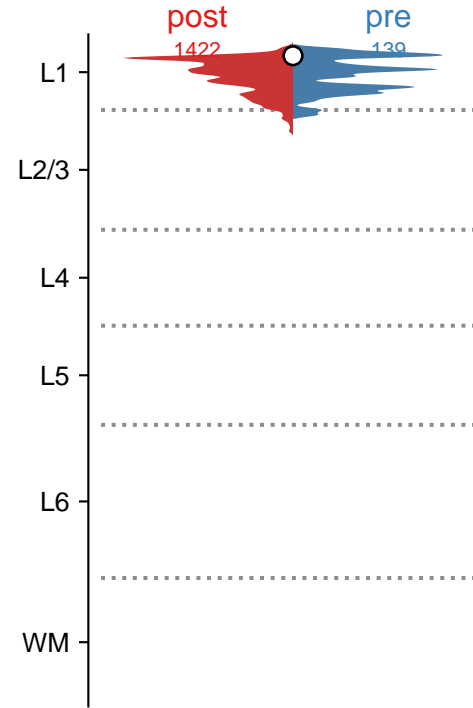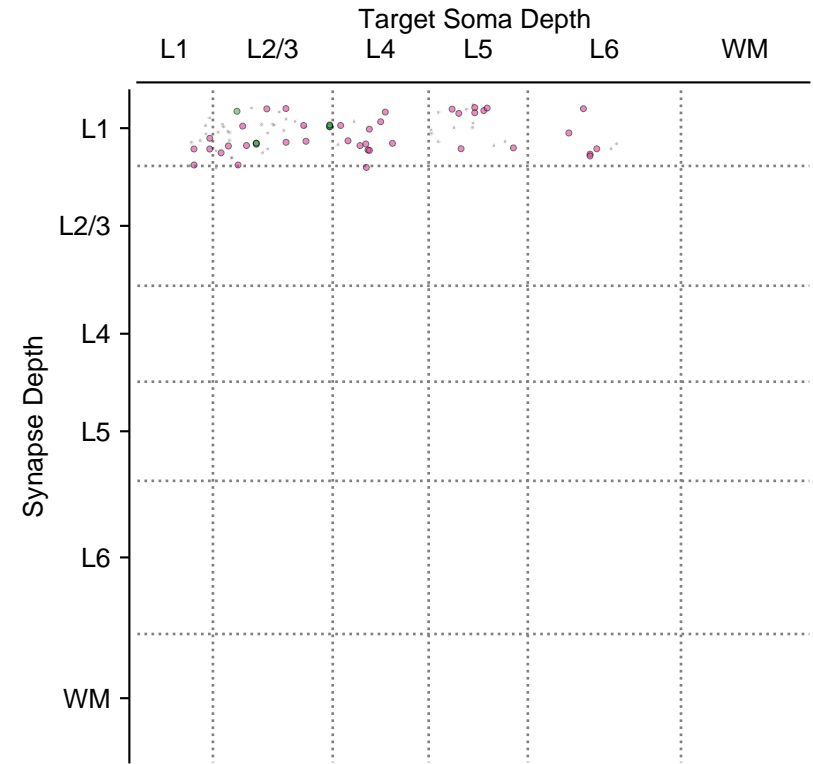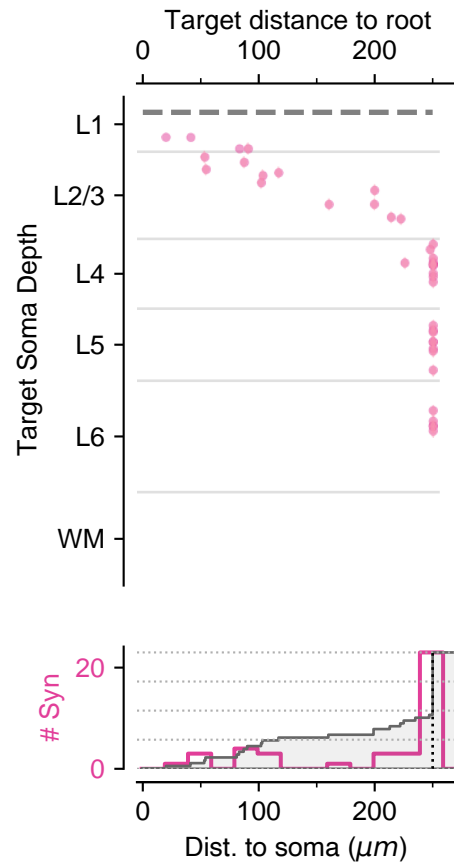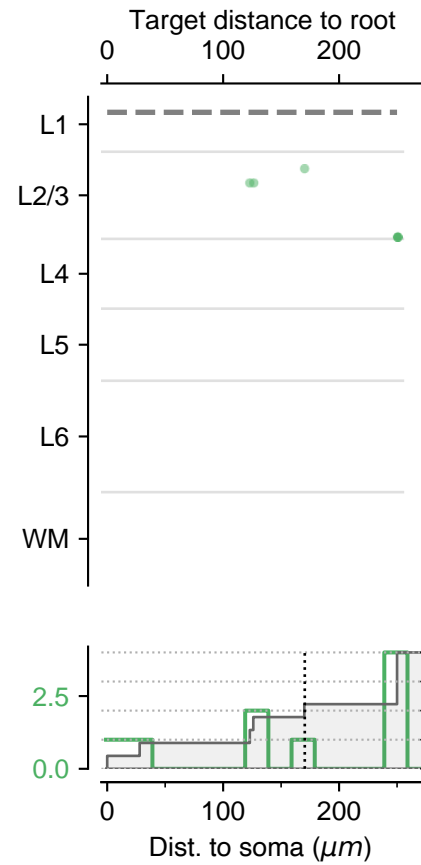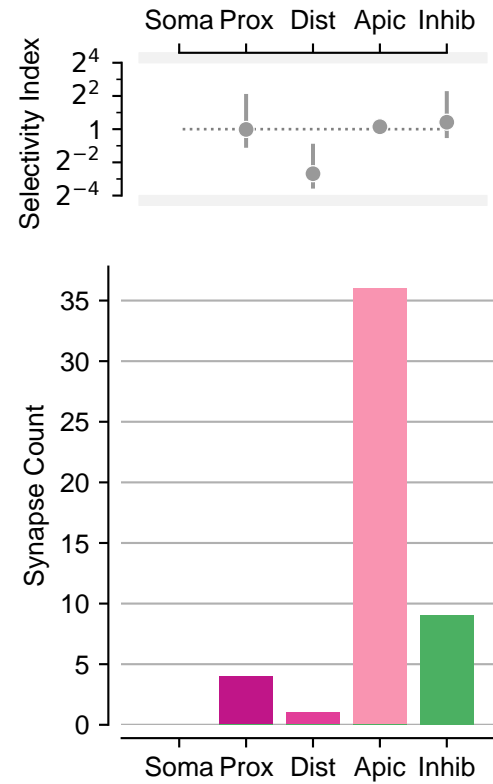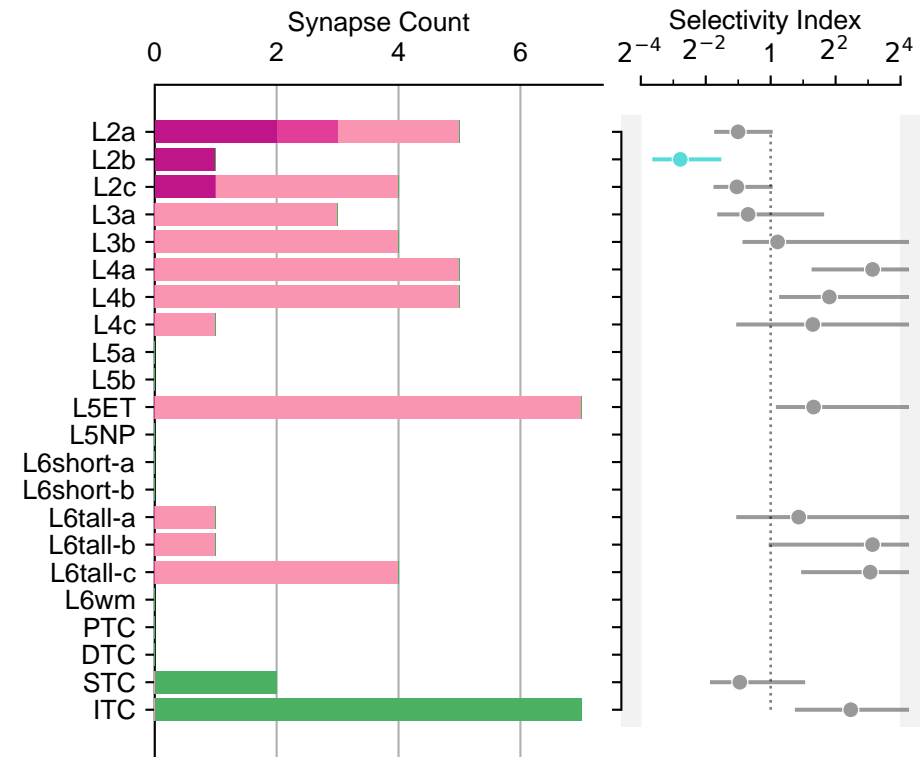

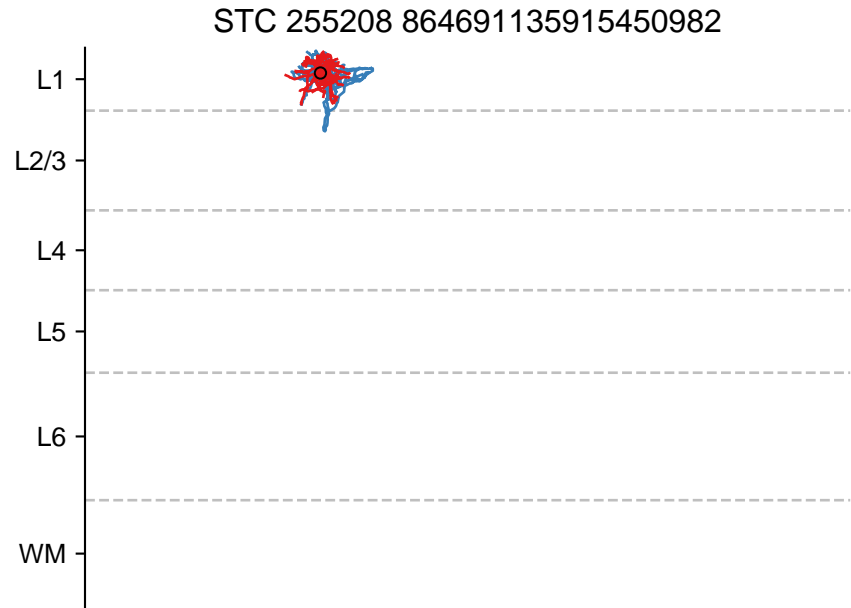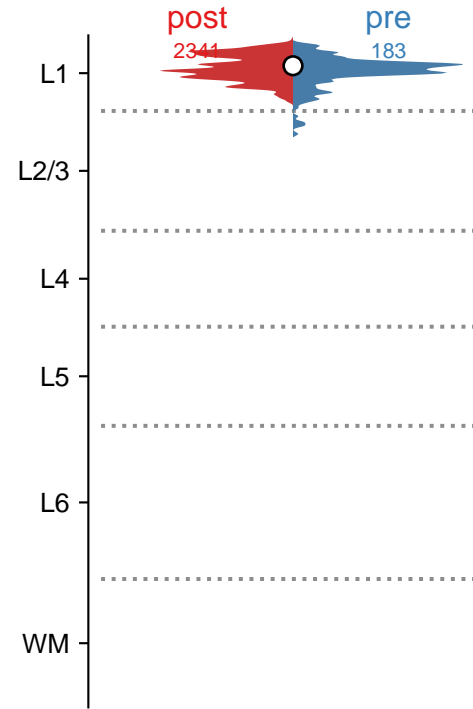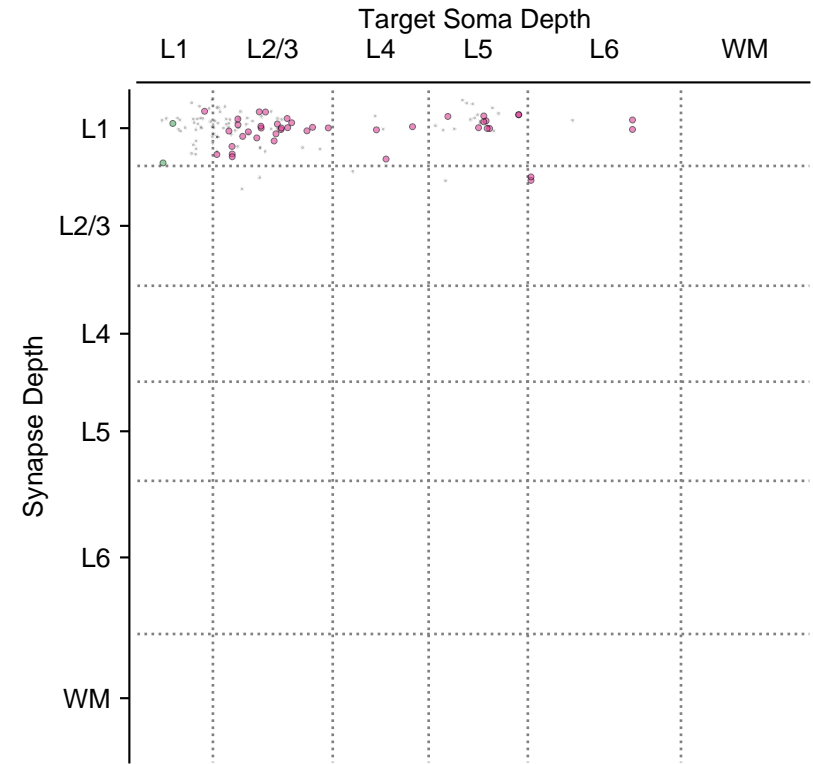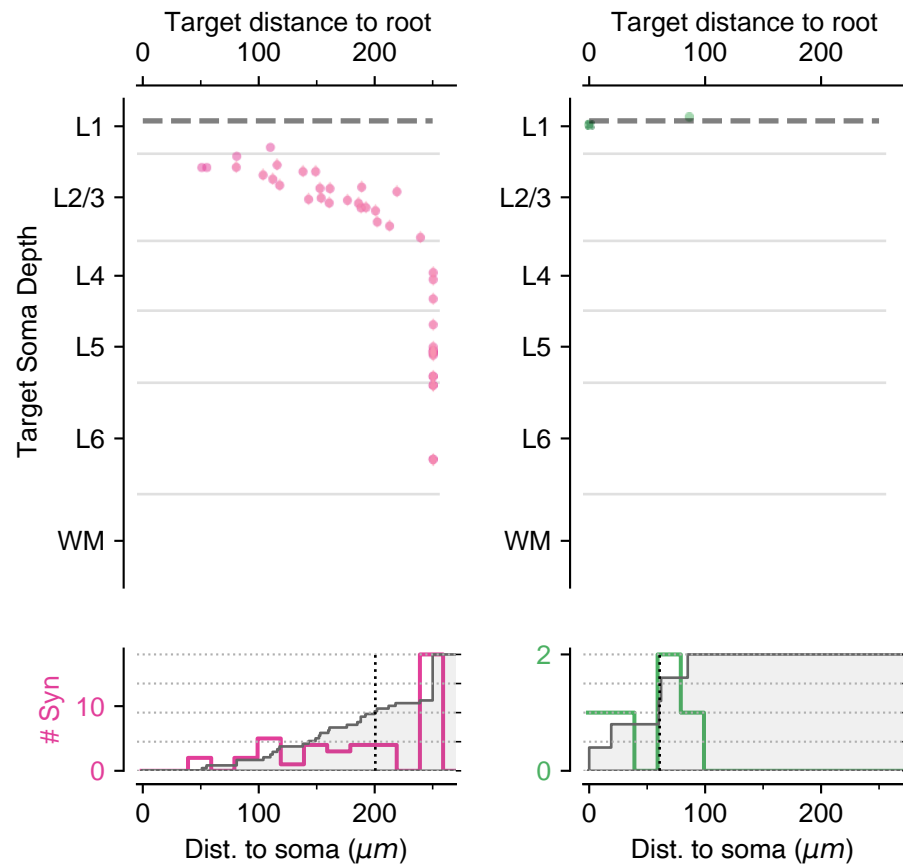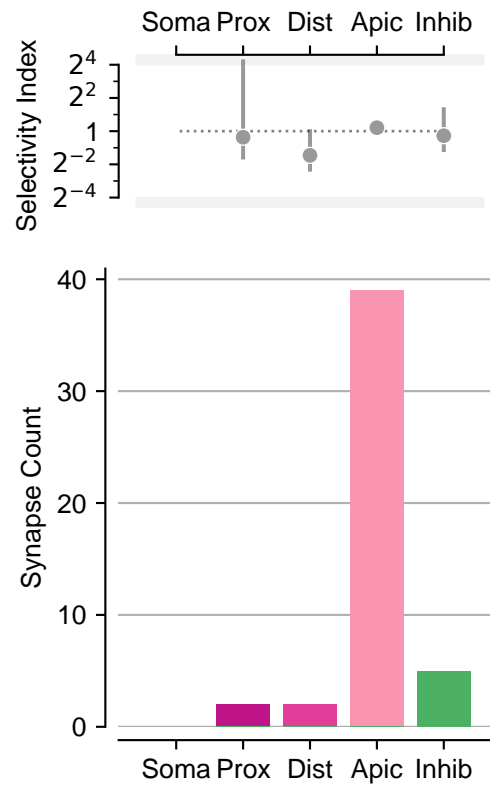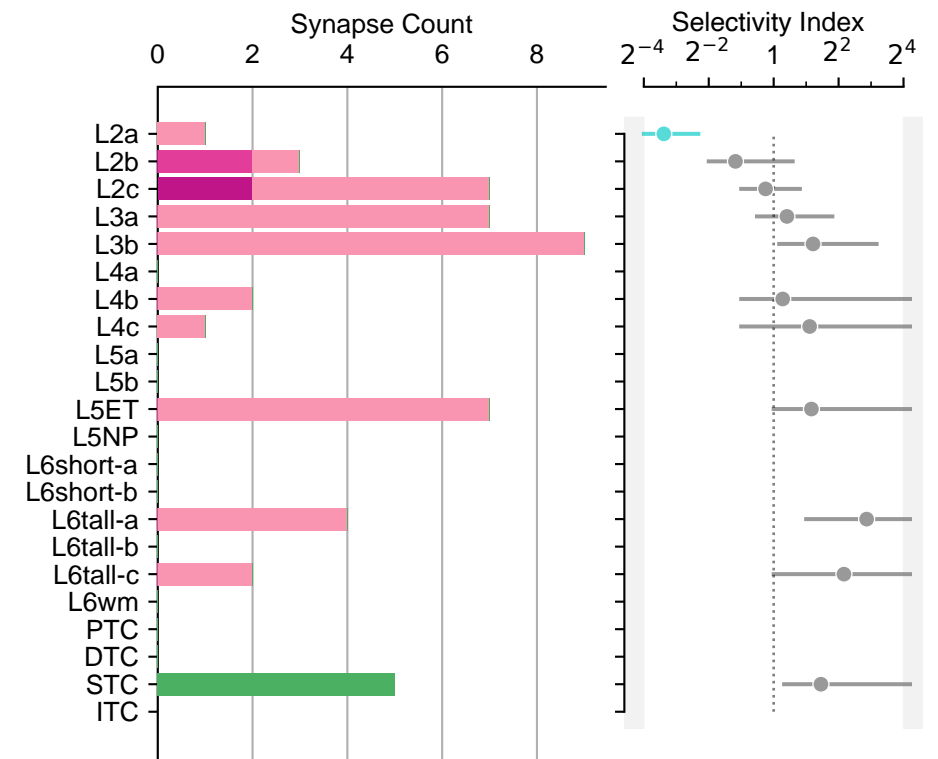

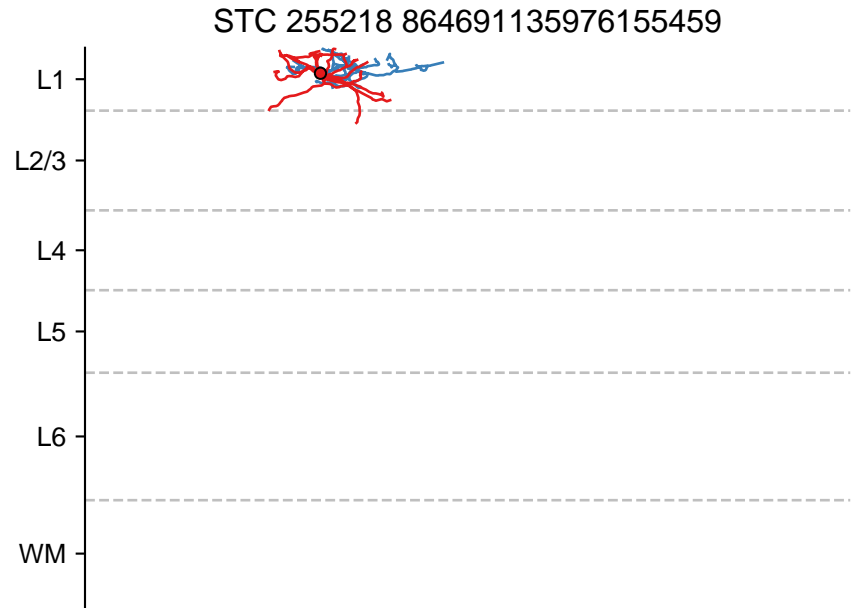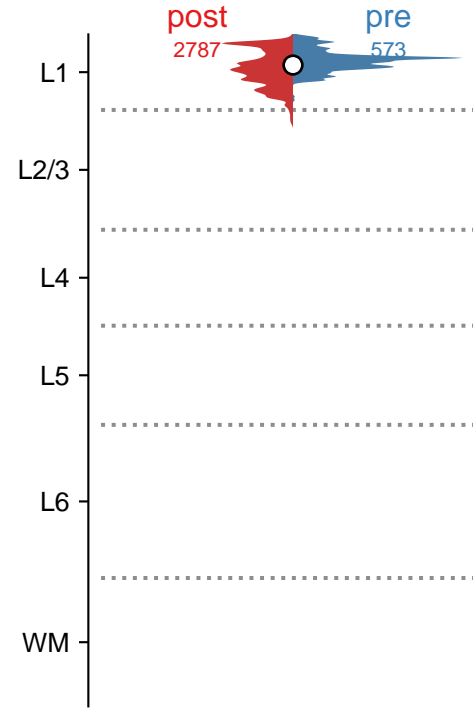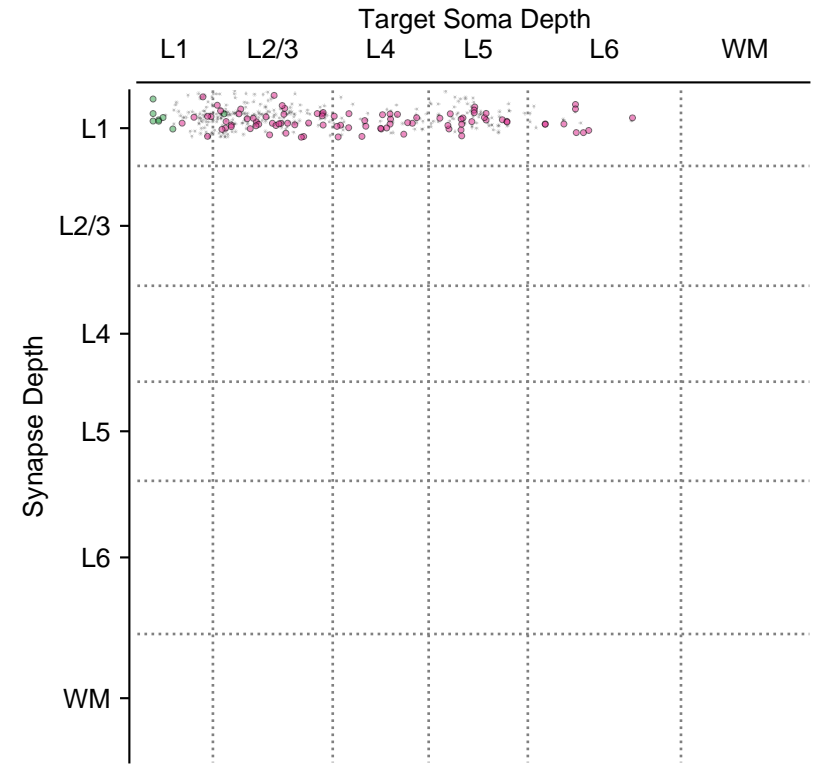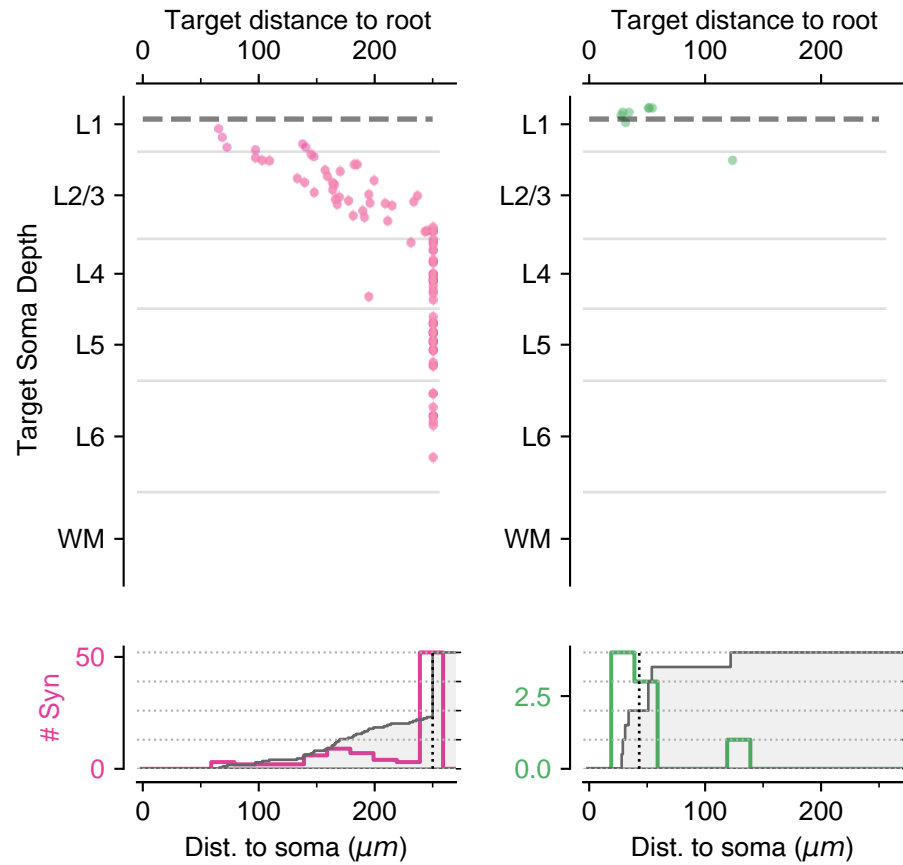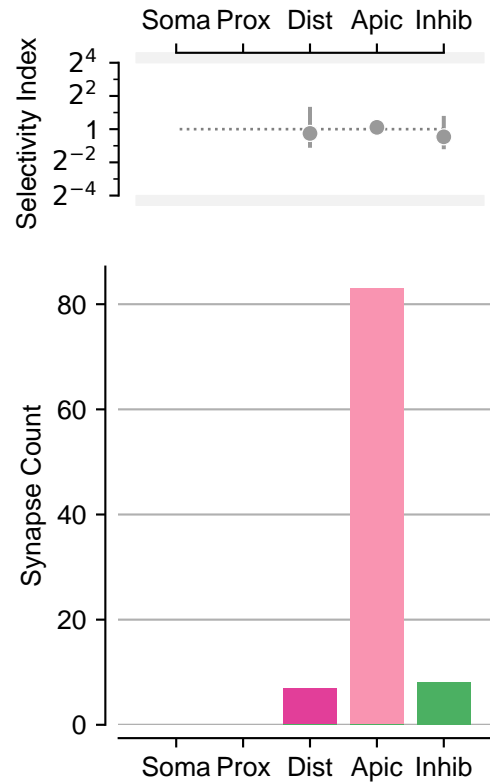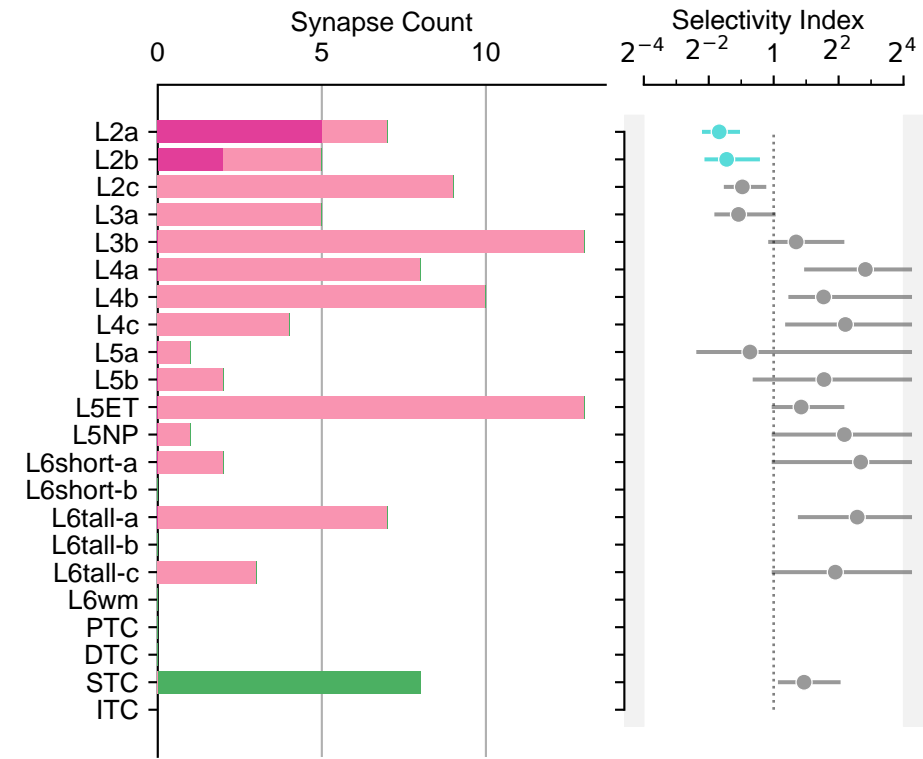

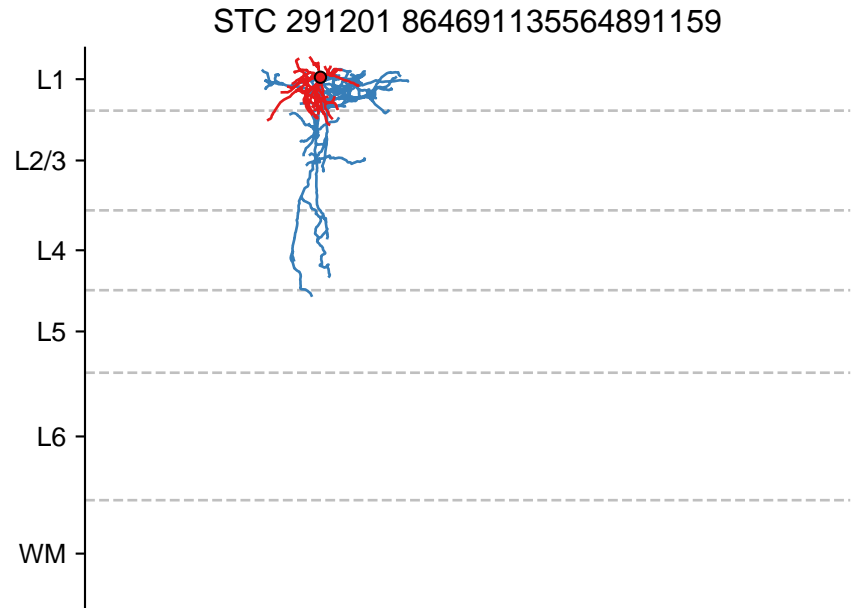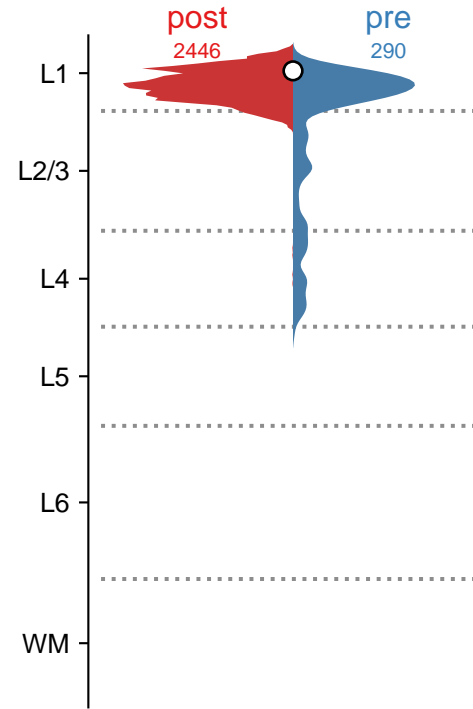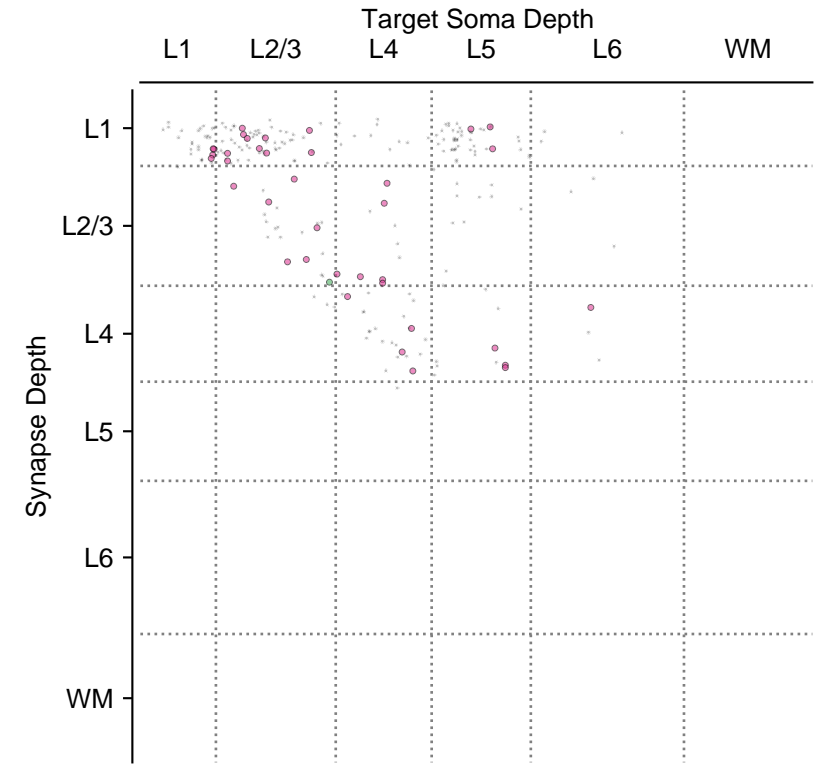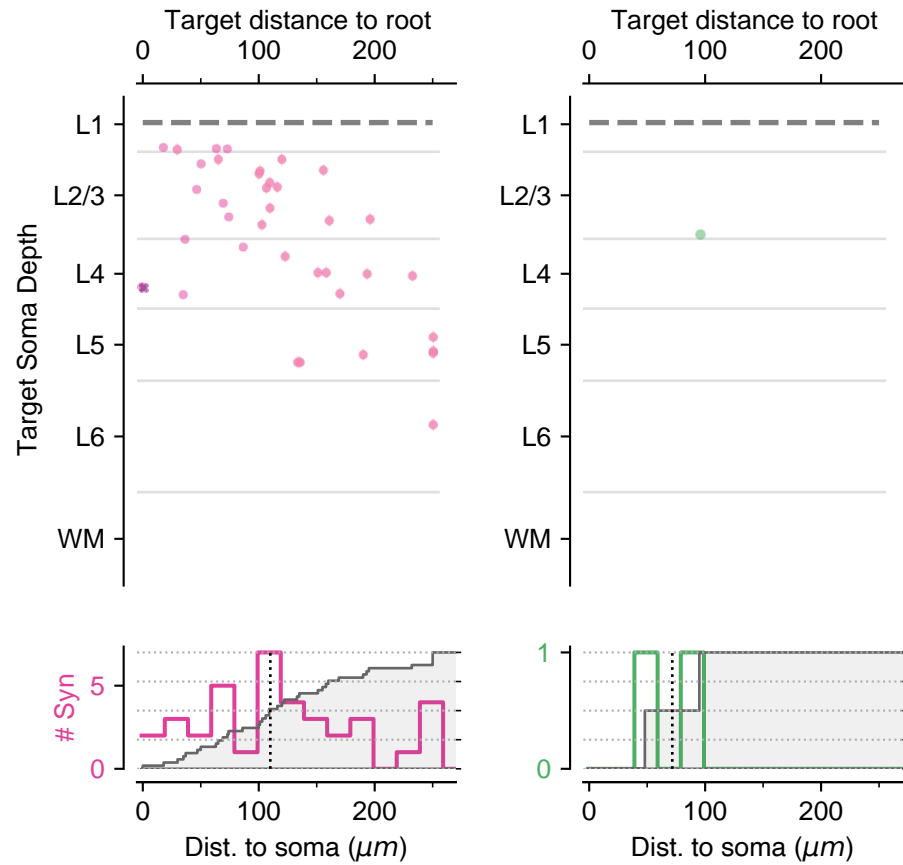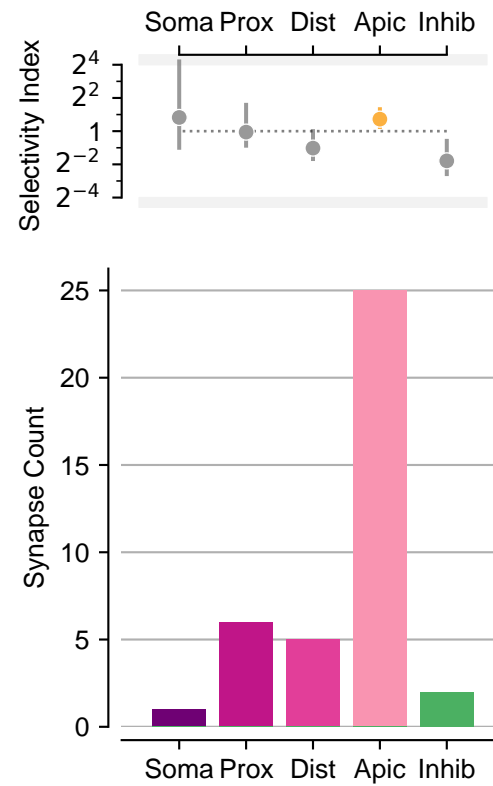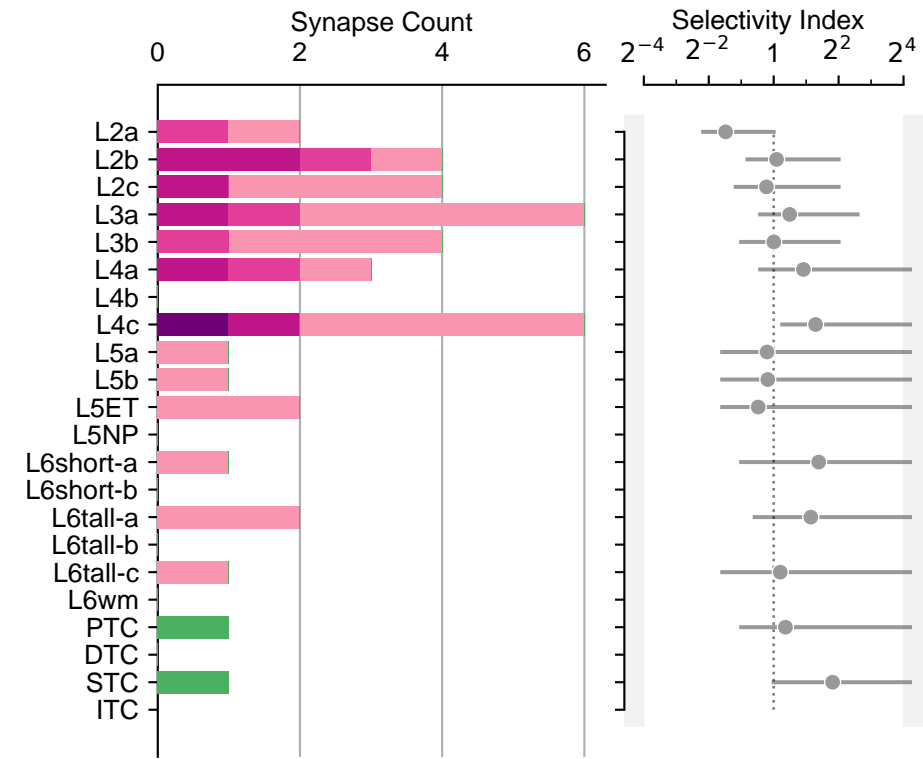

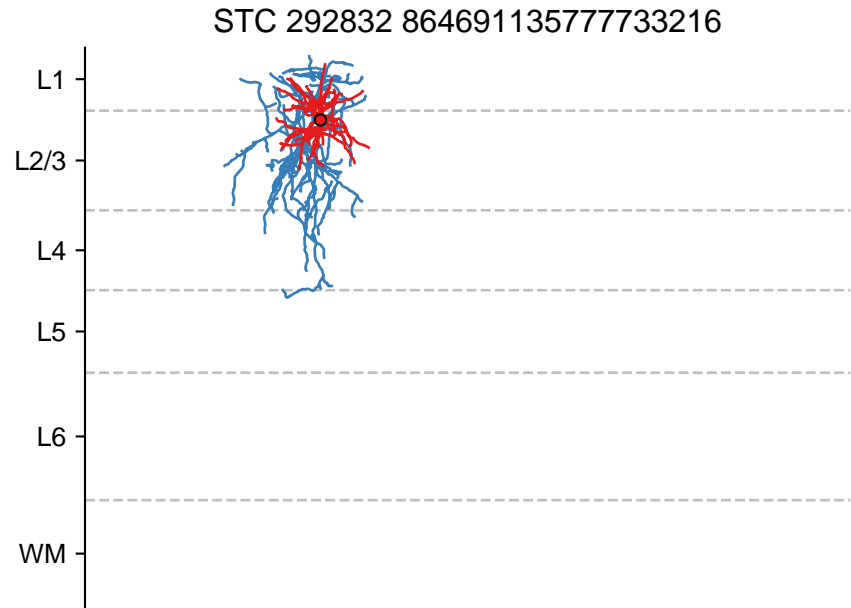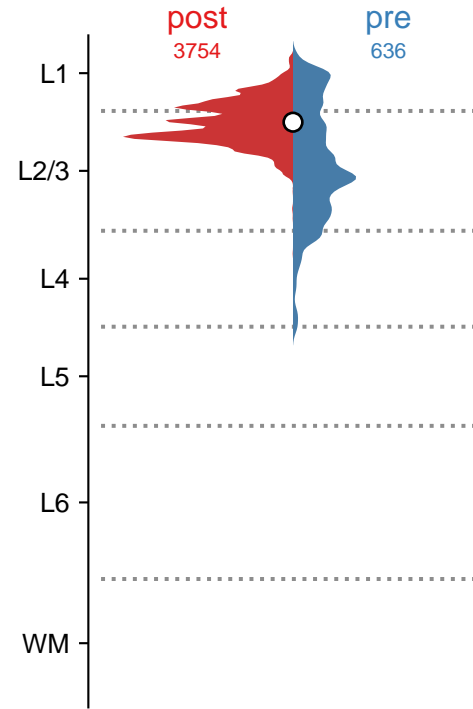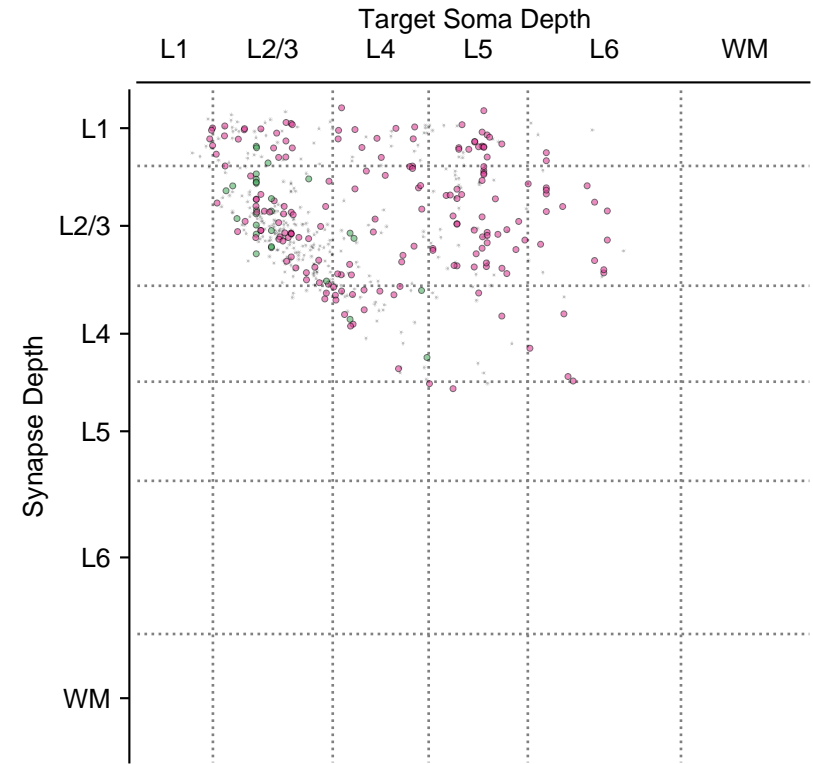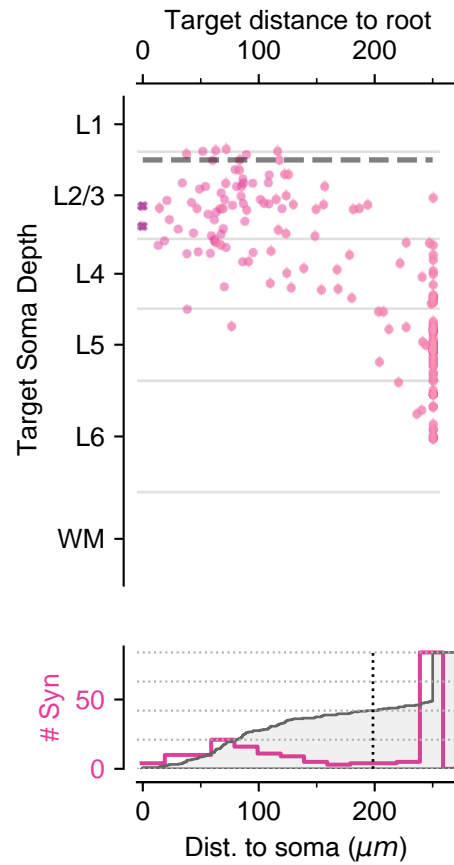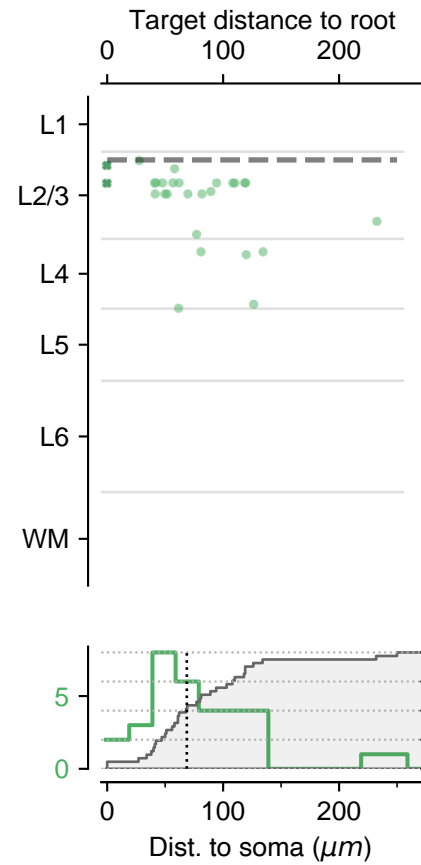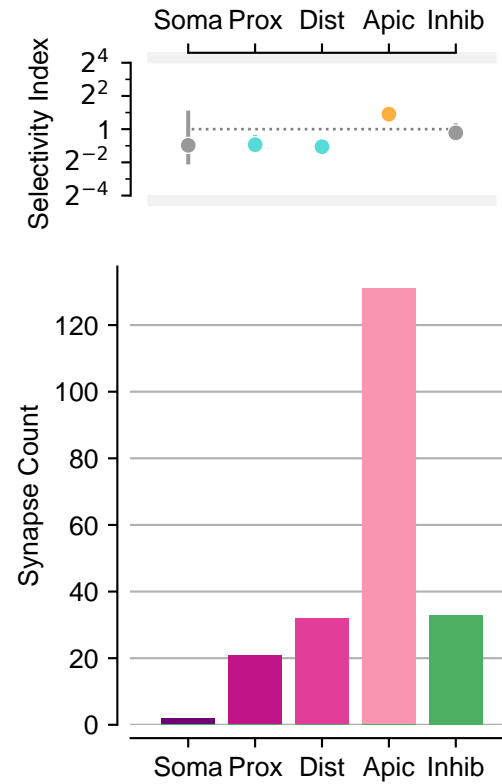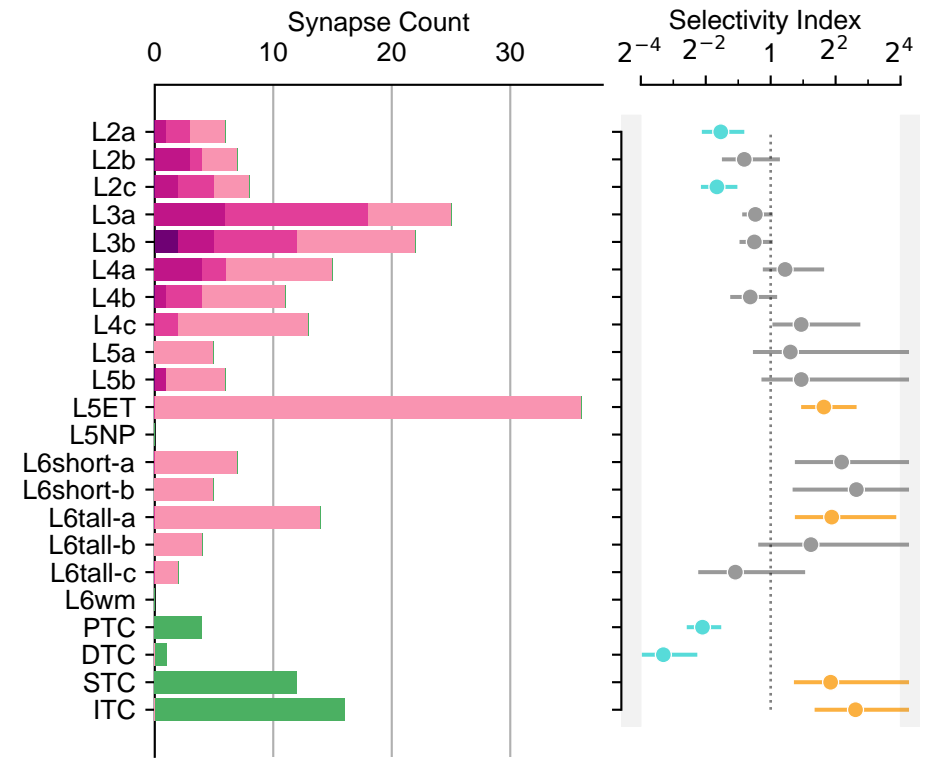

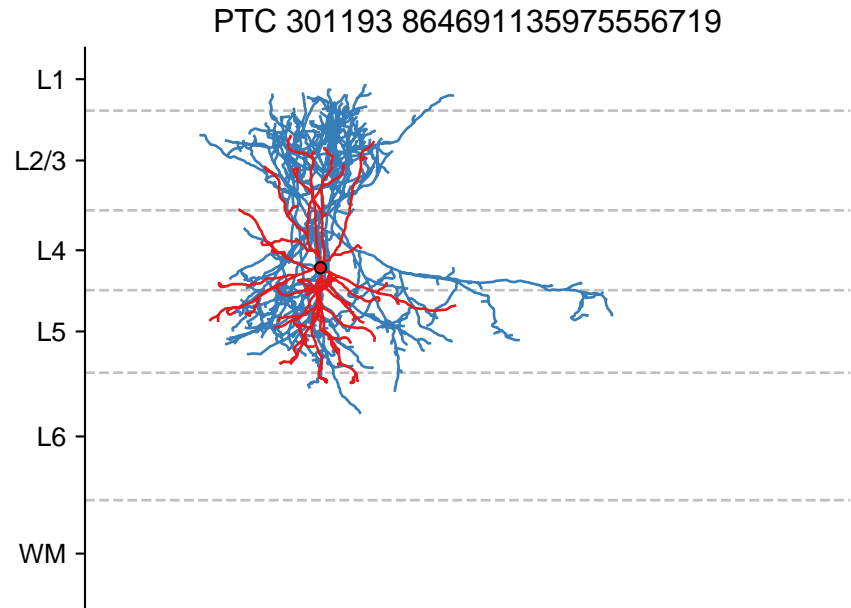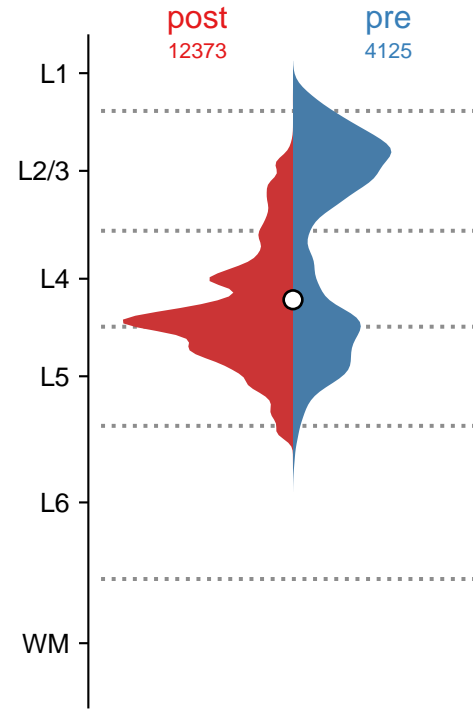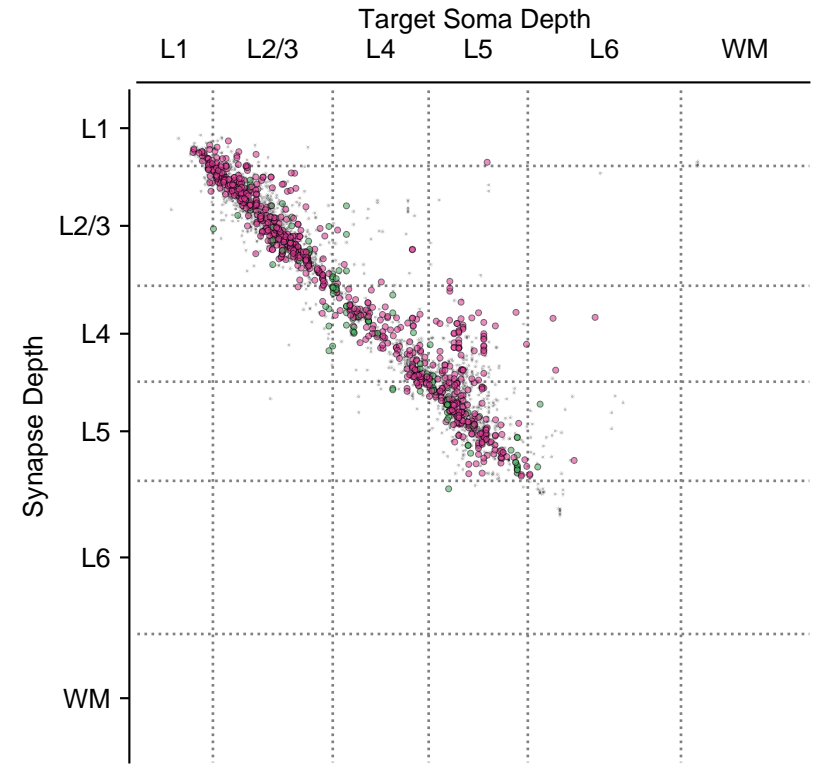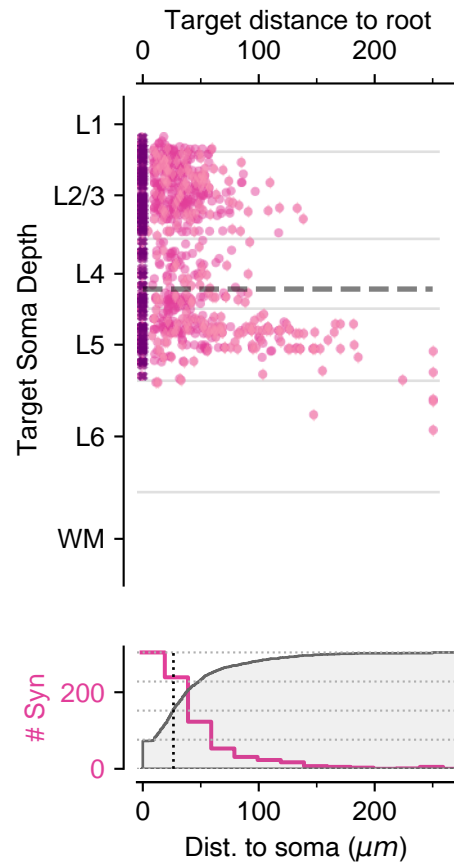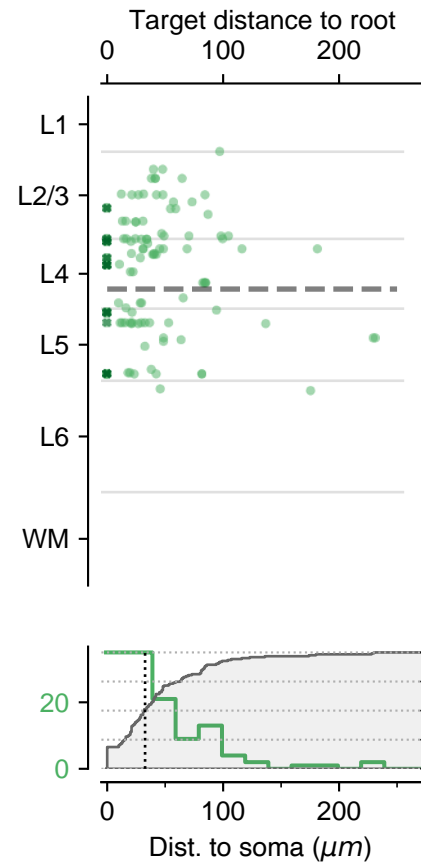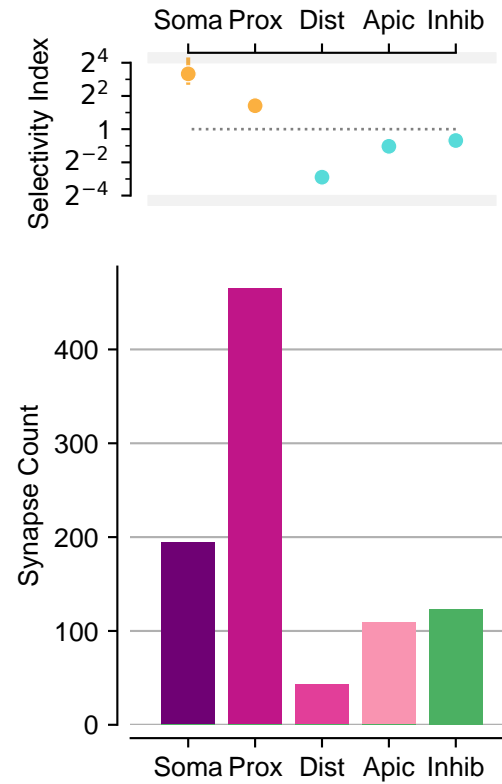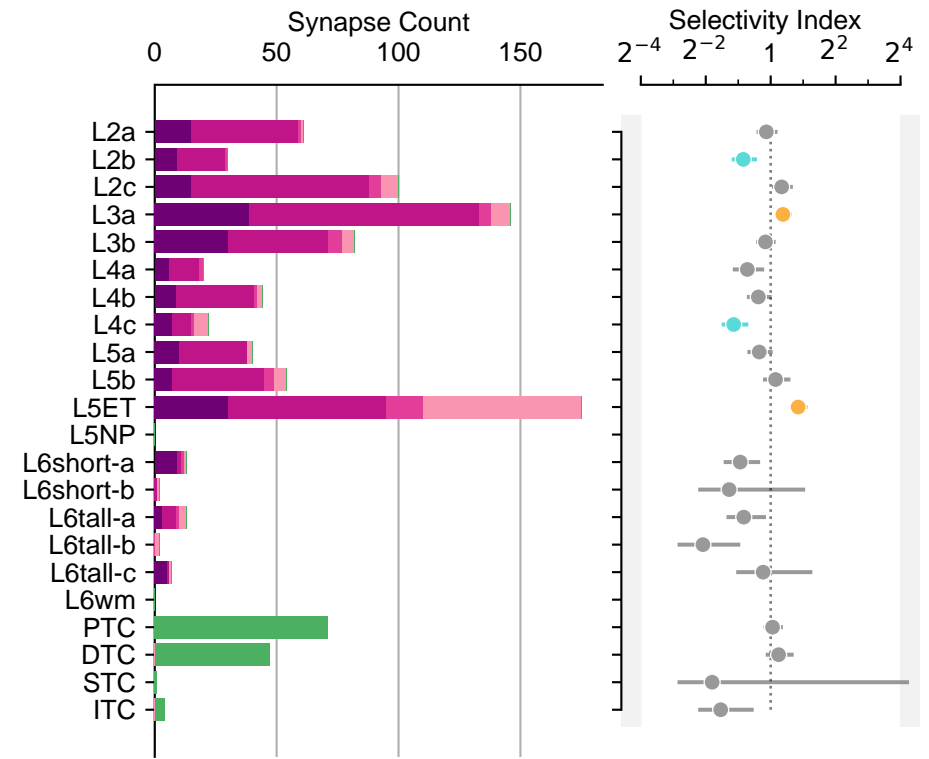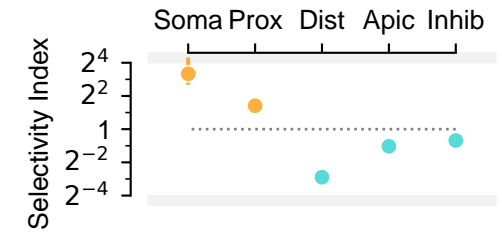



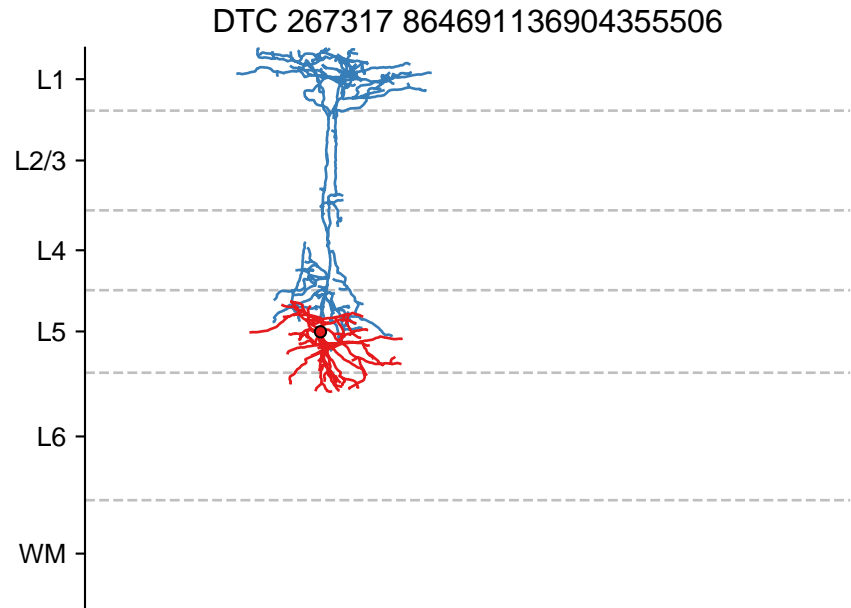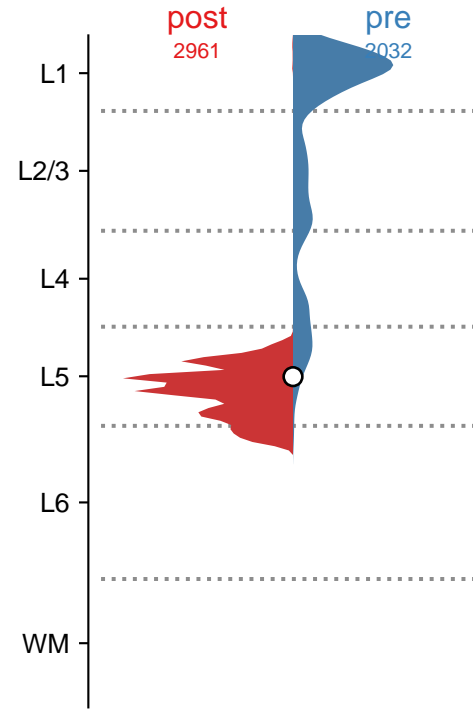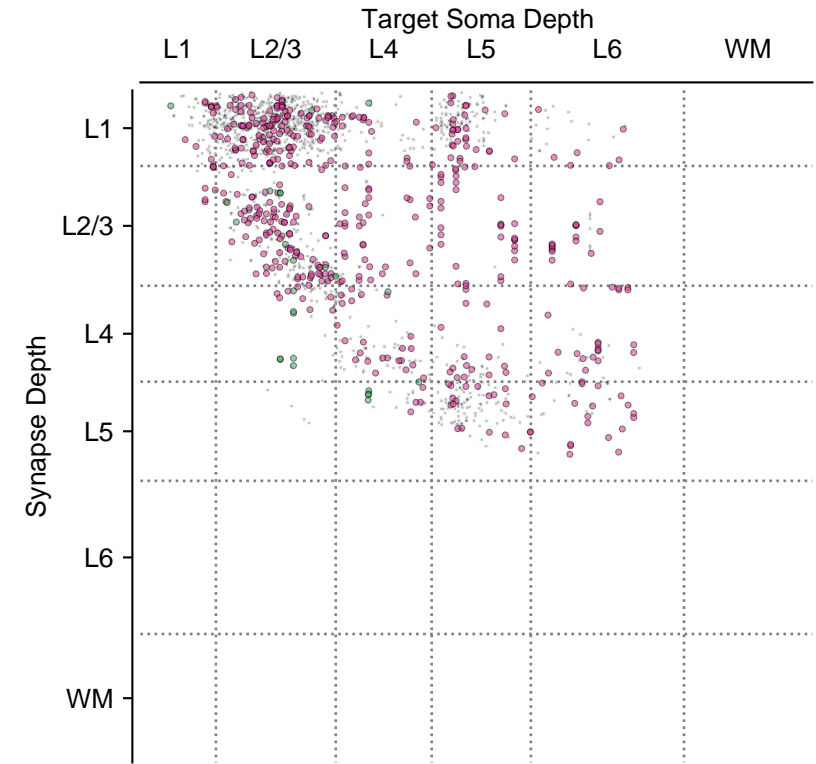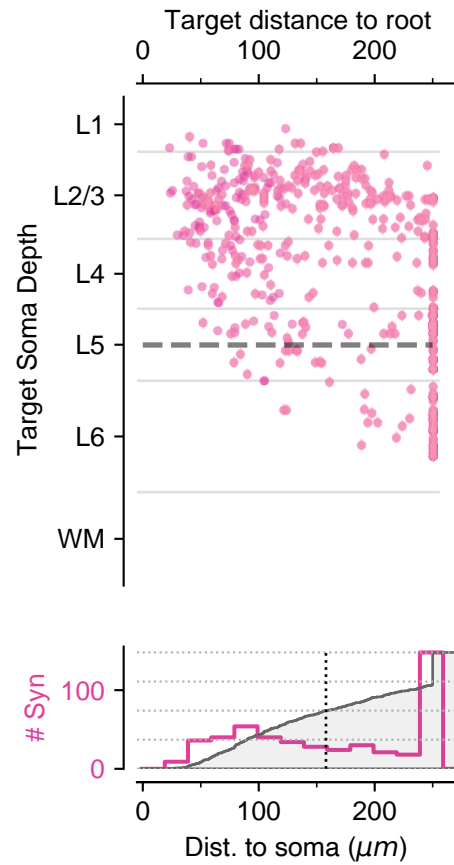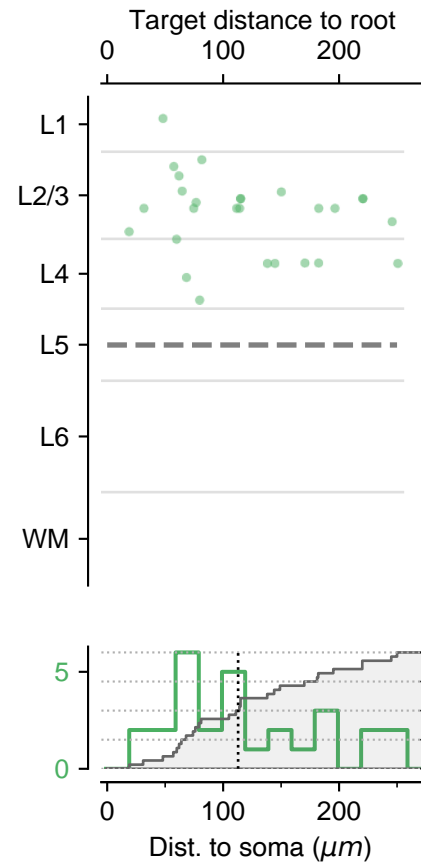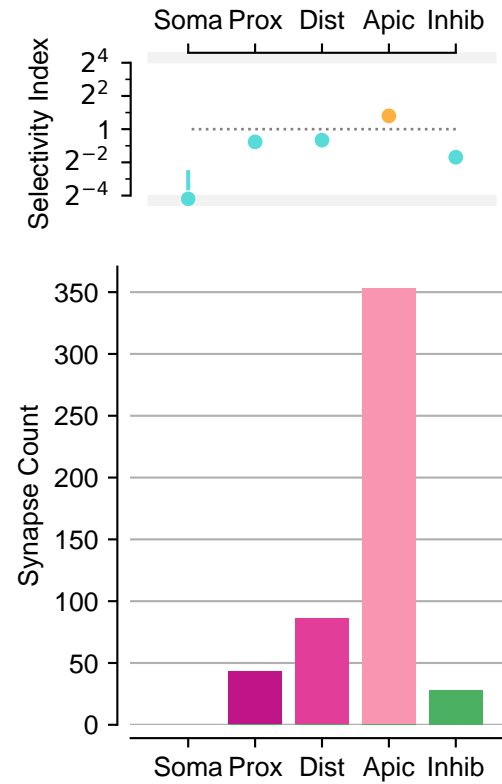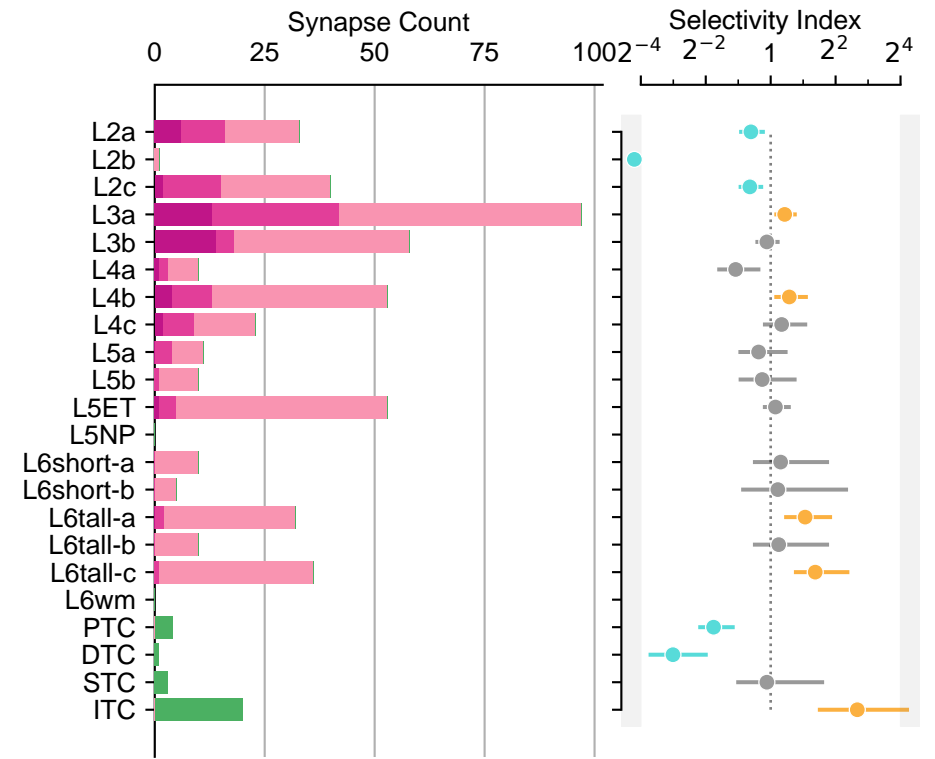

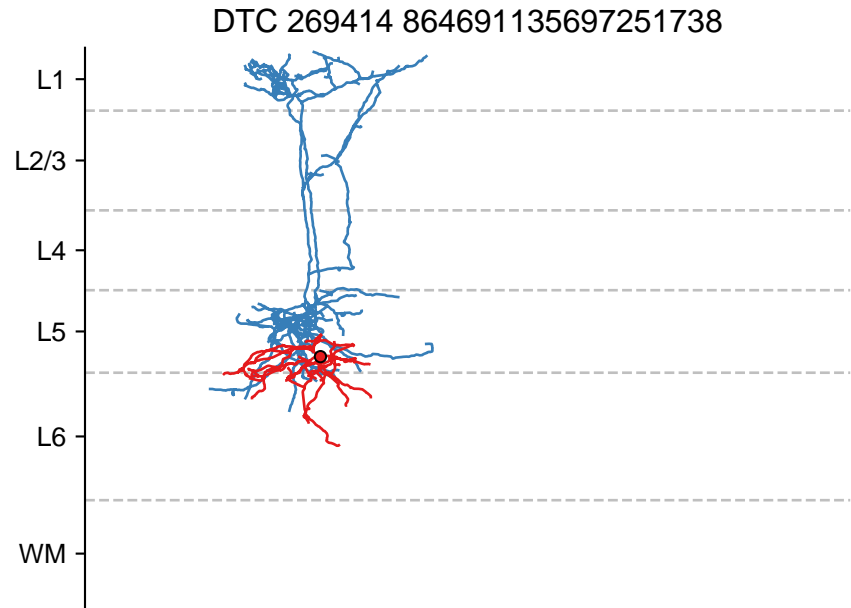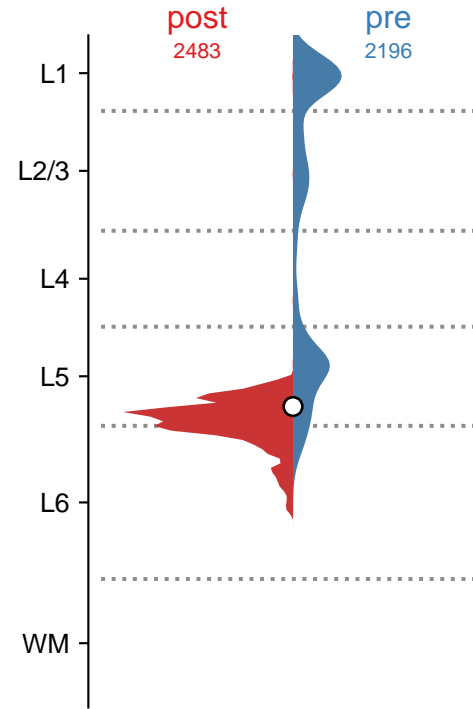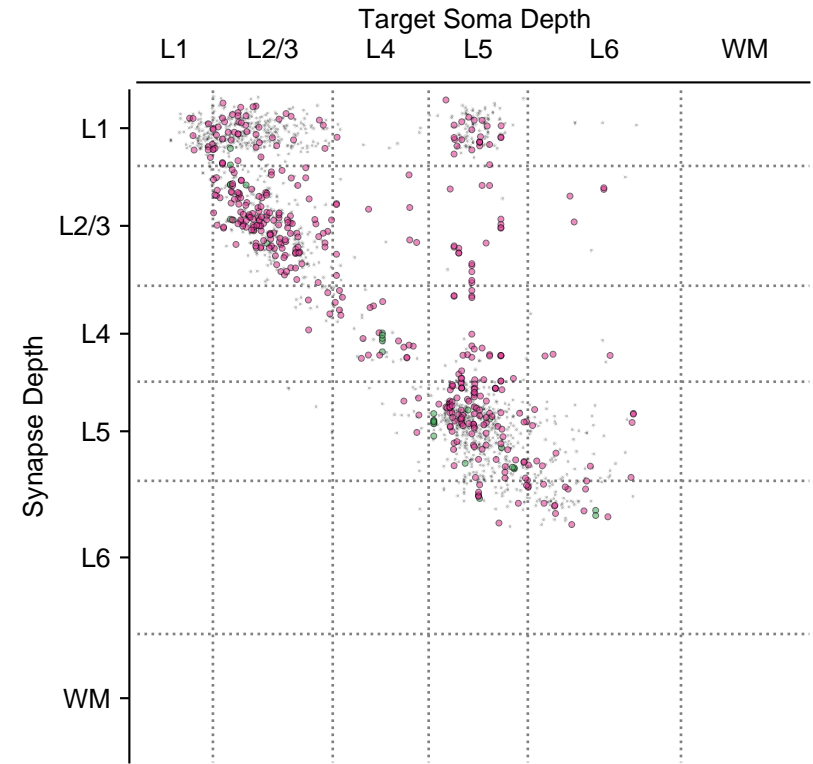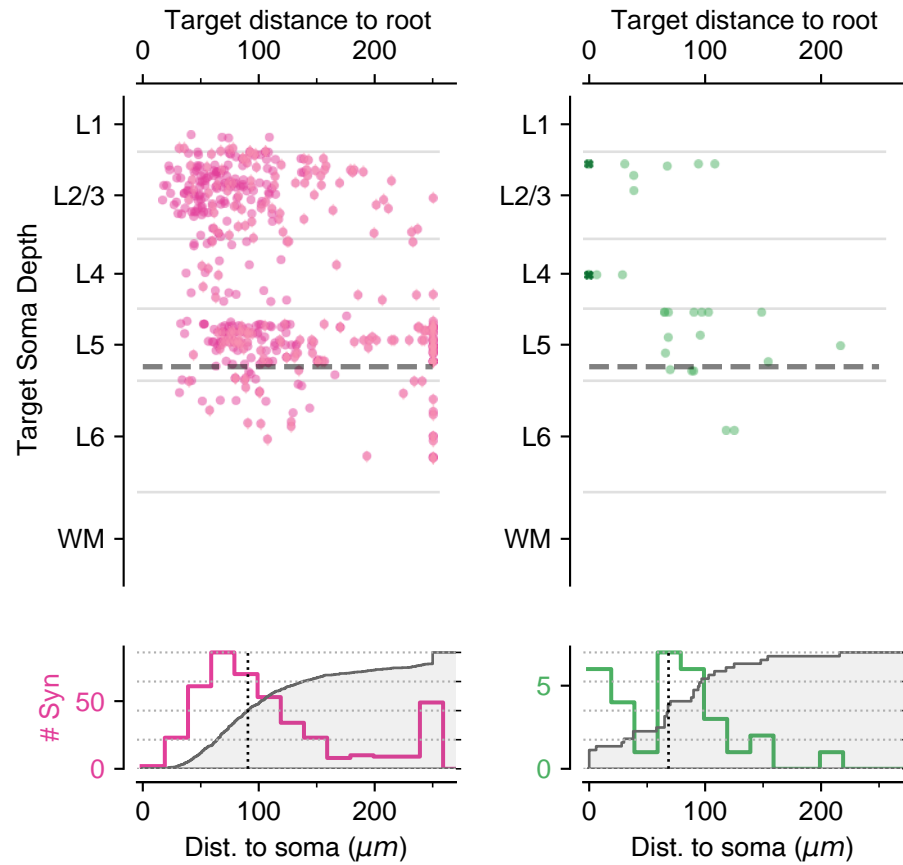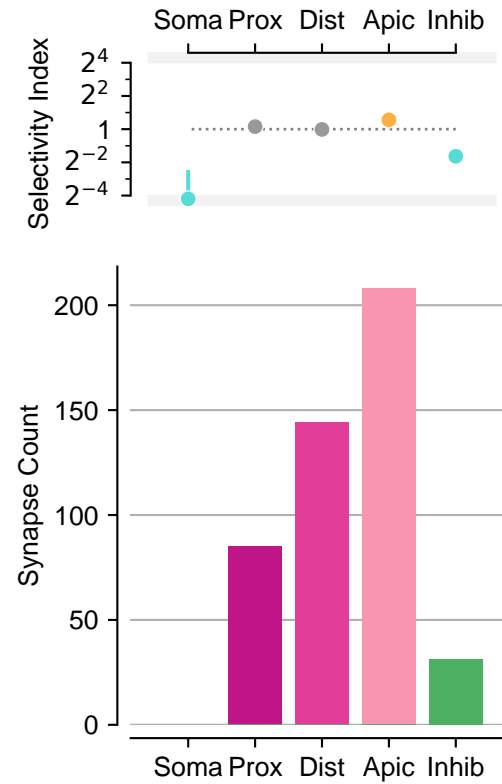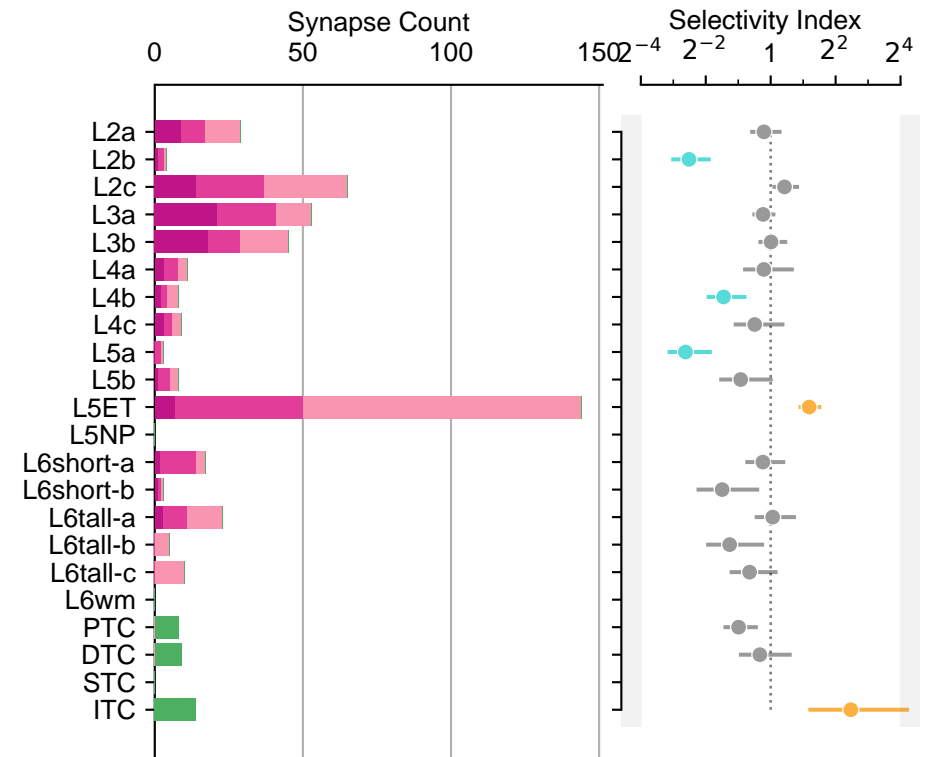

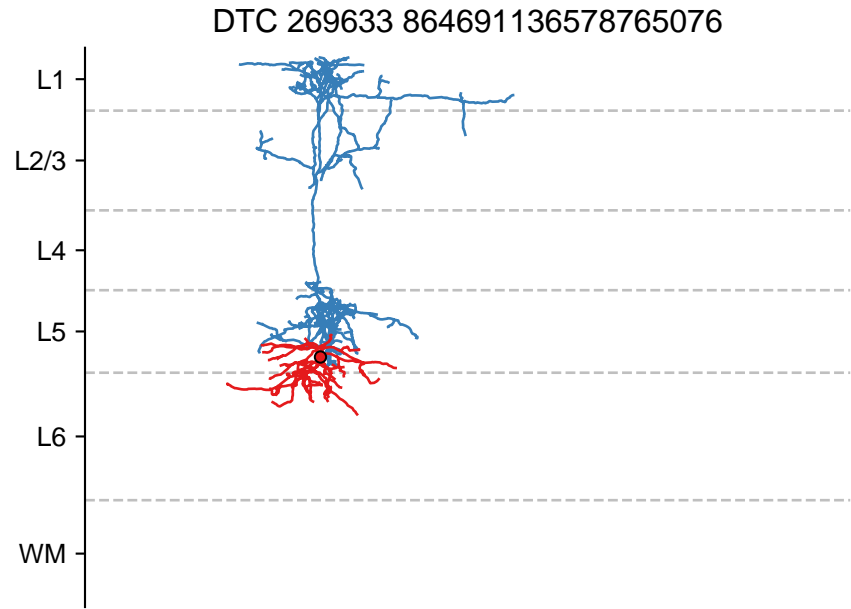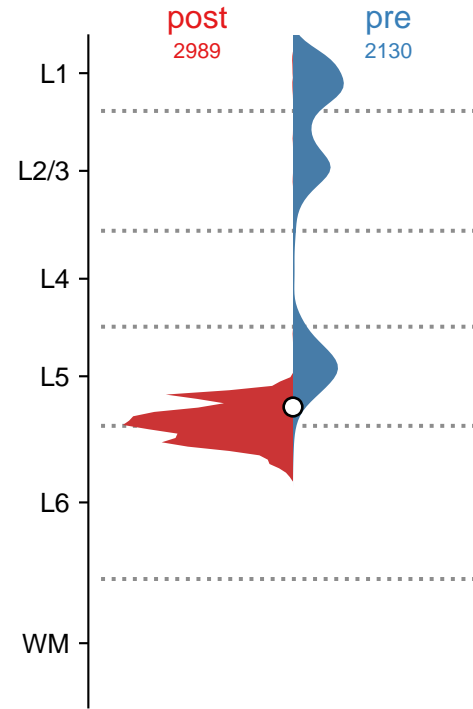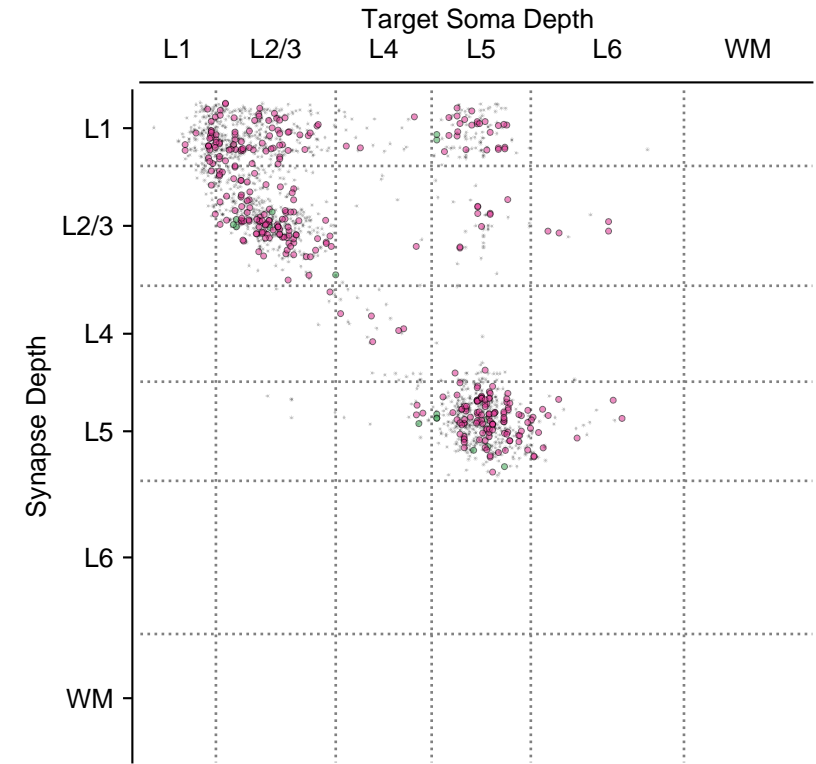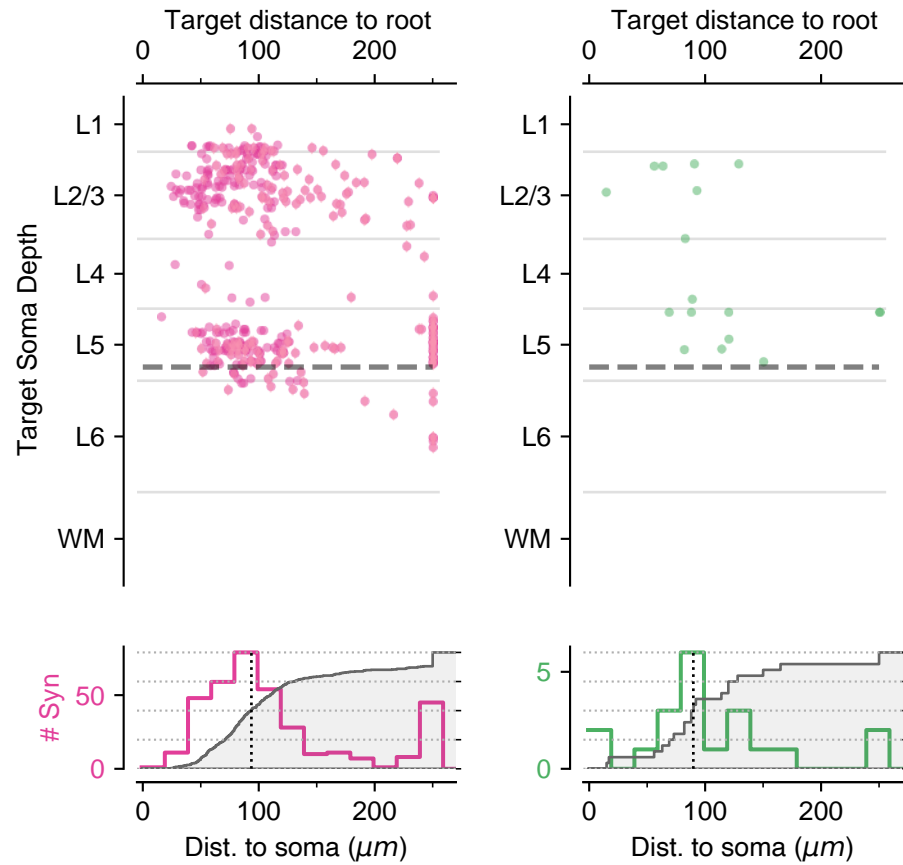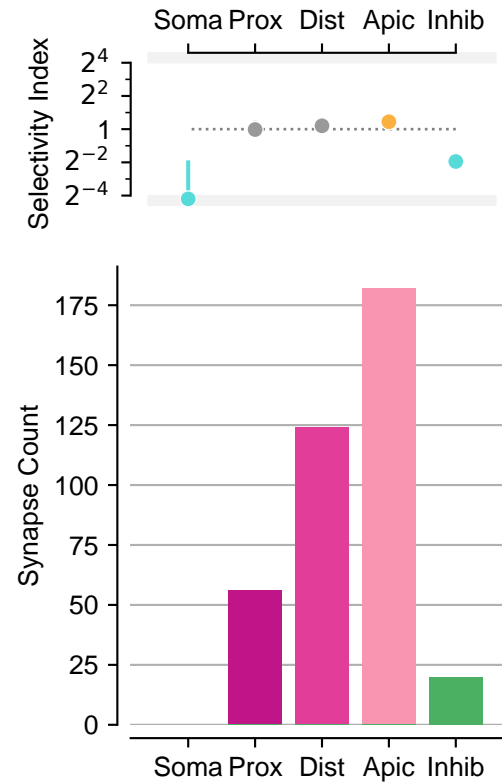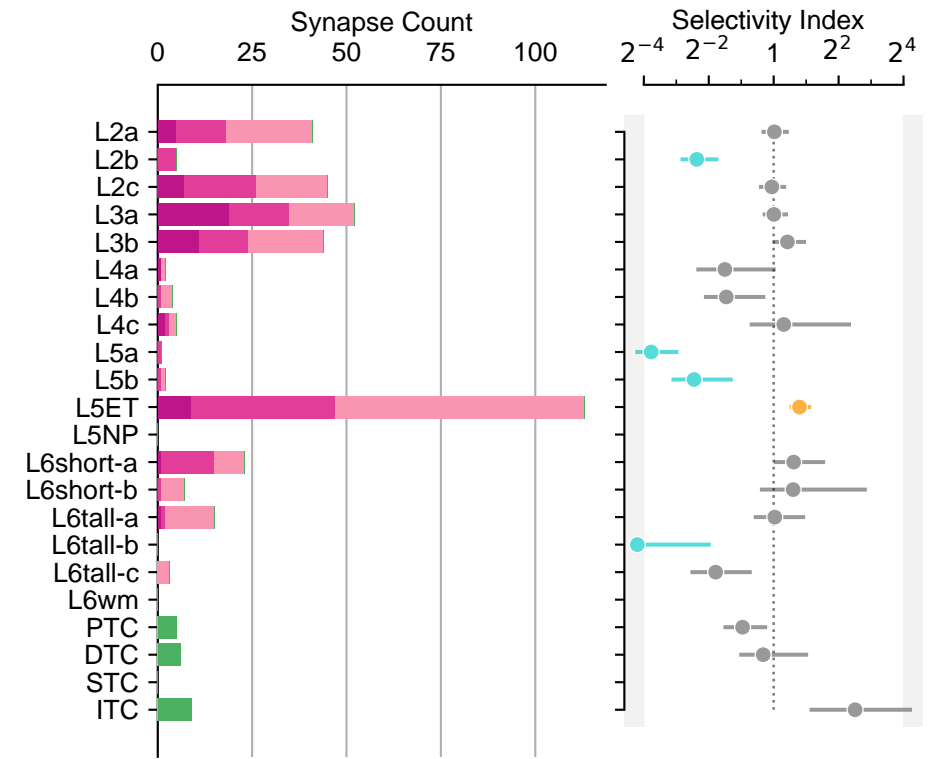

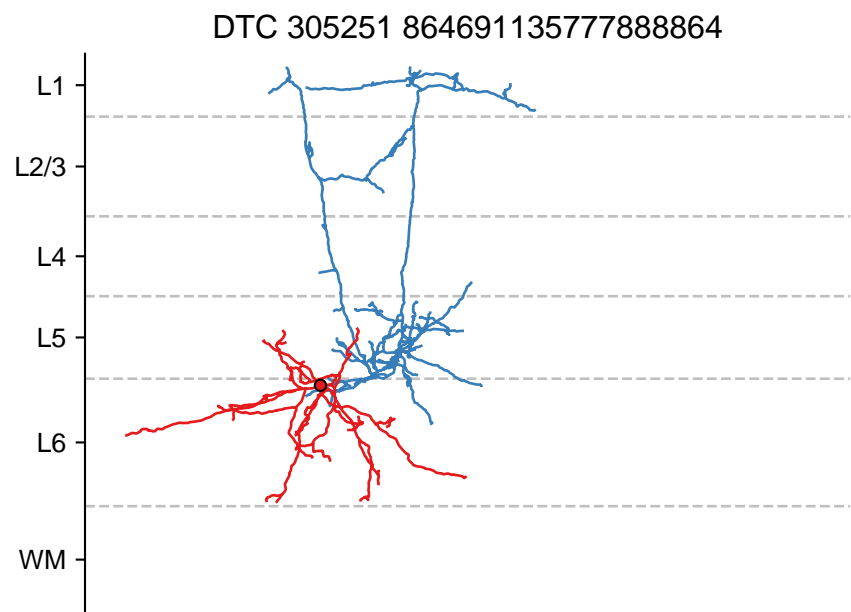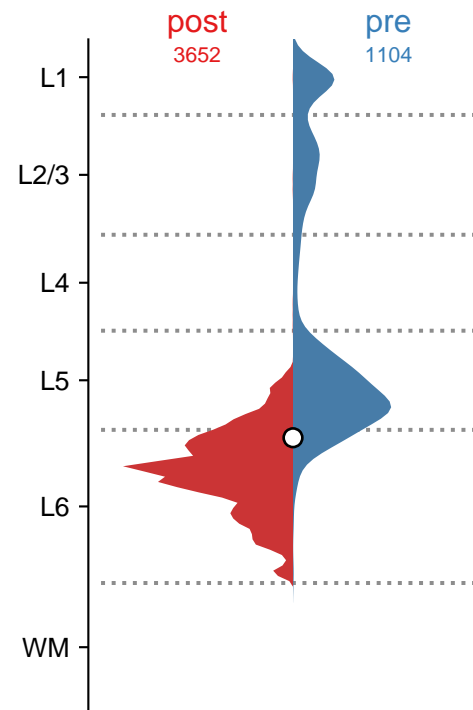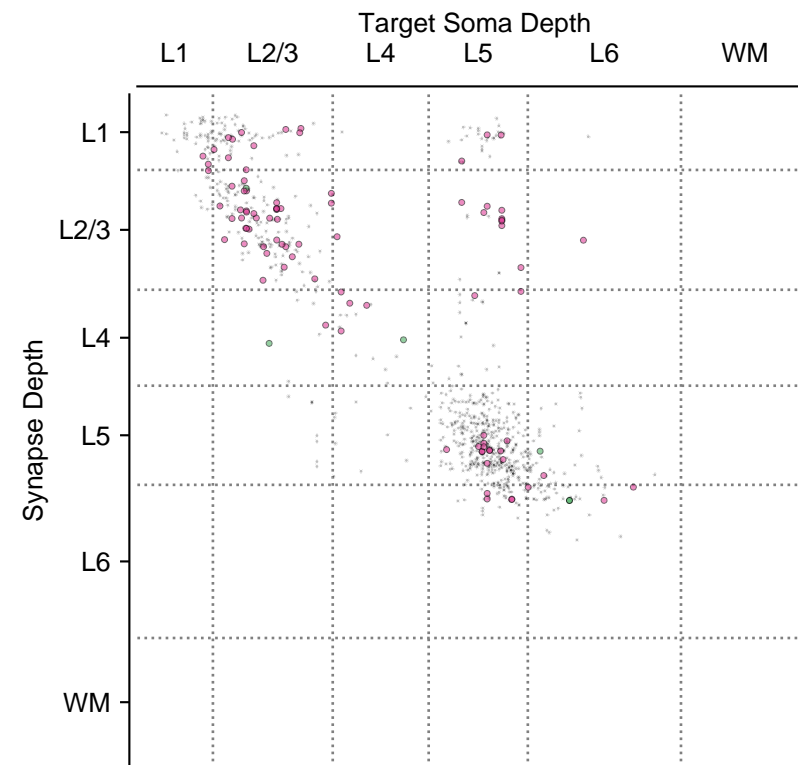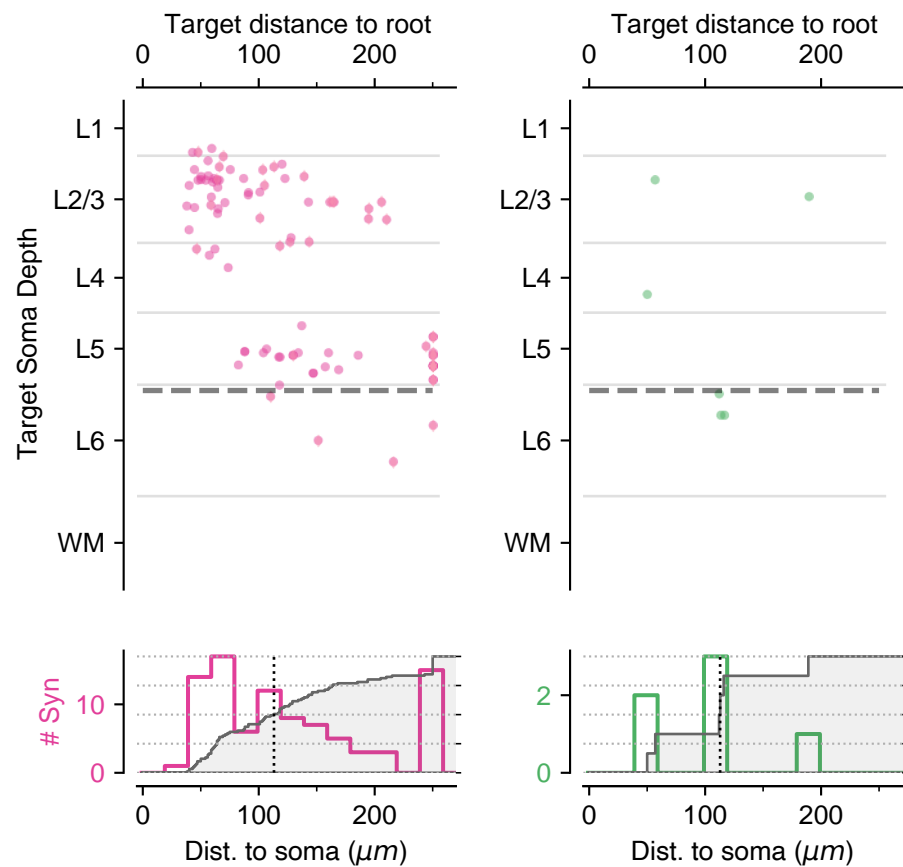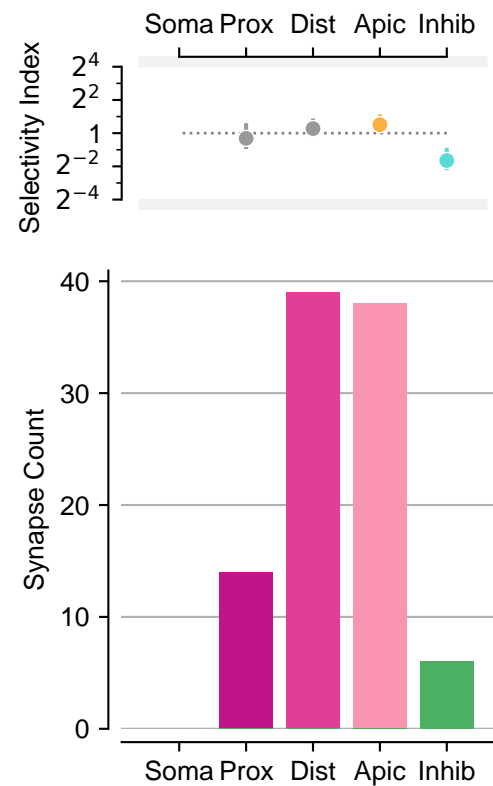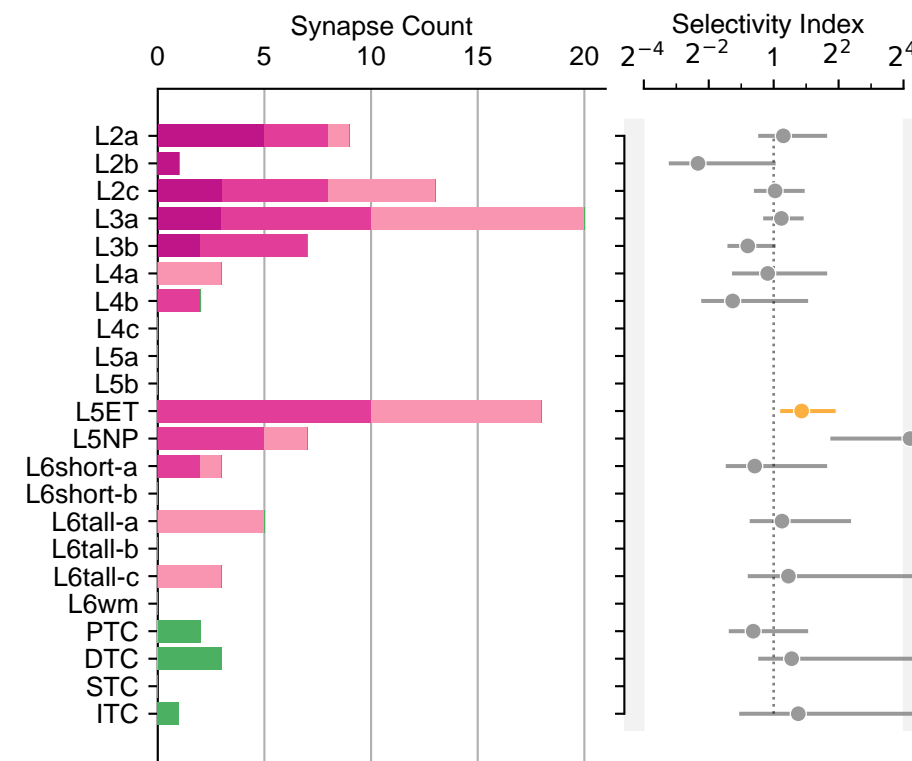

# Motif Group 7

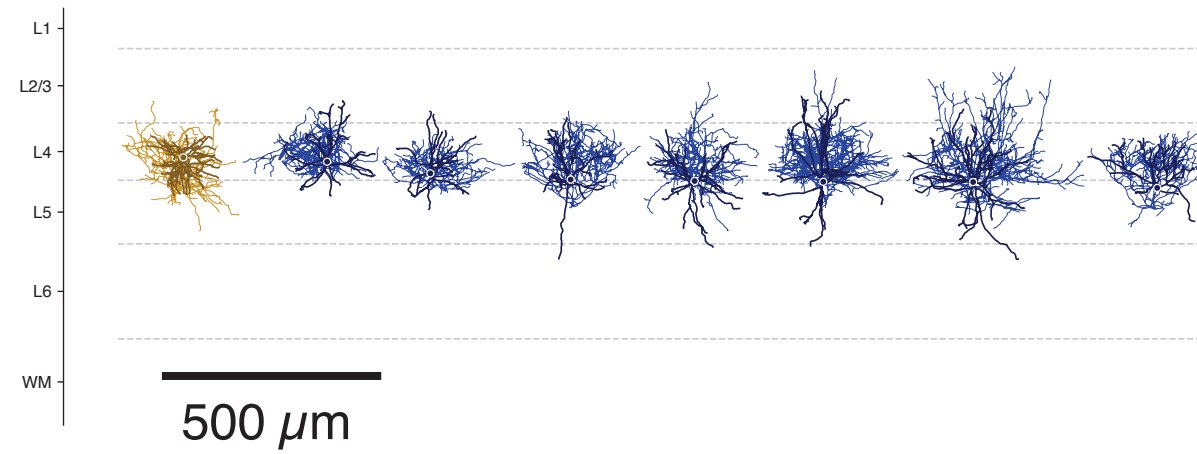

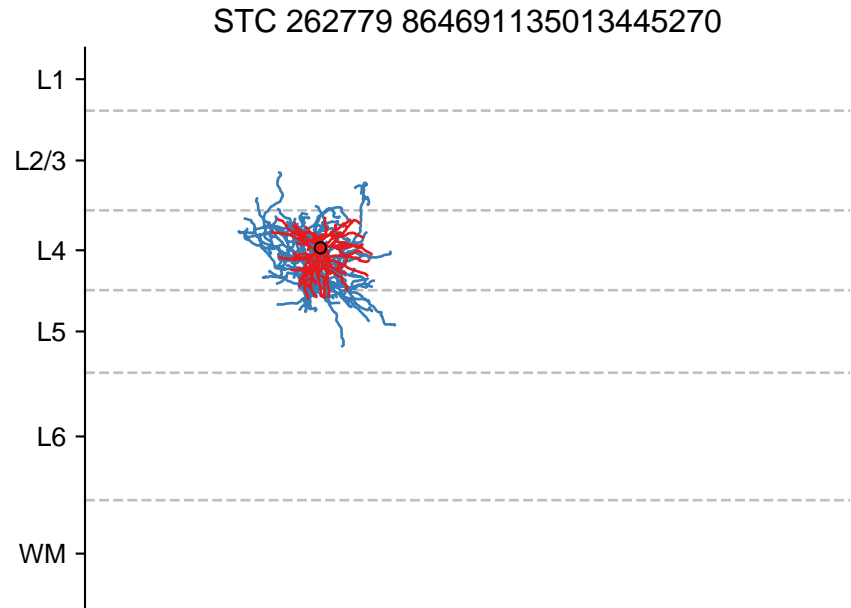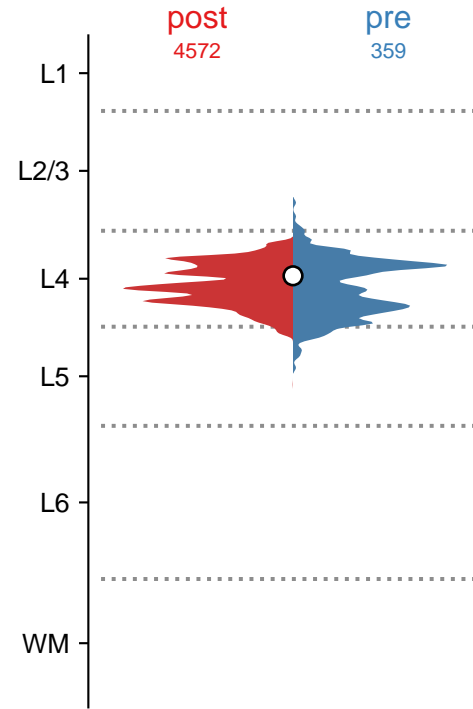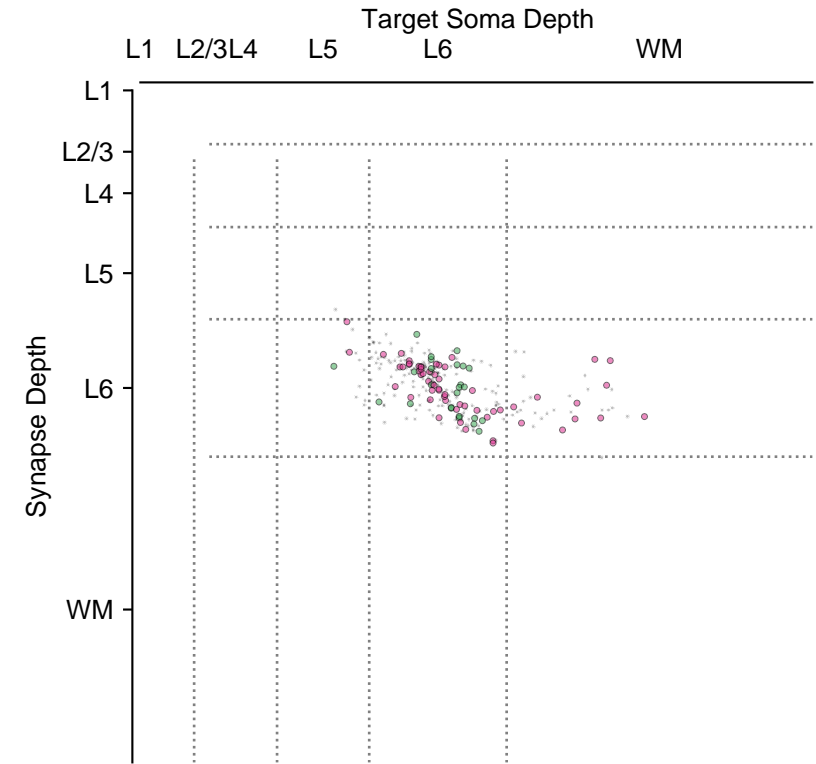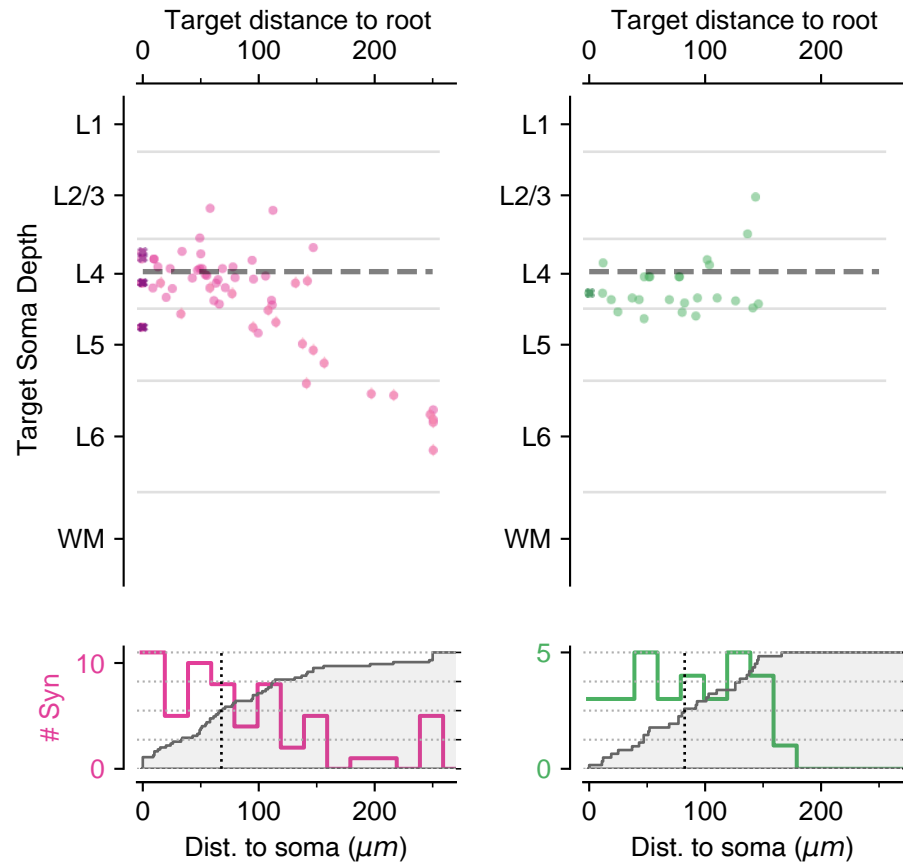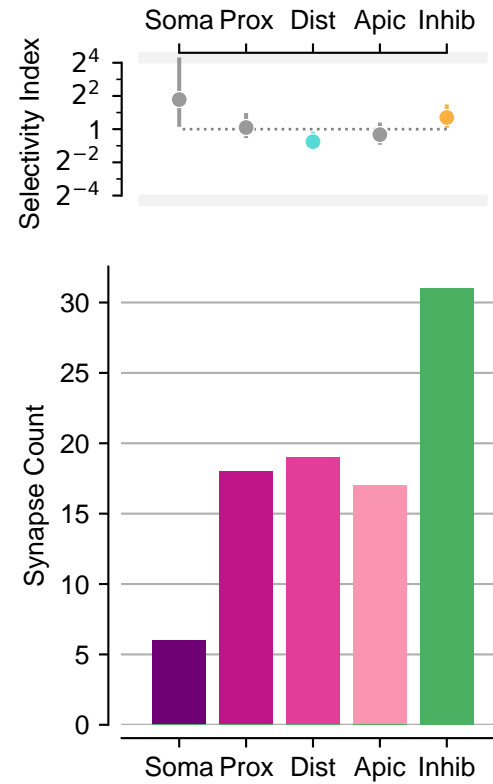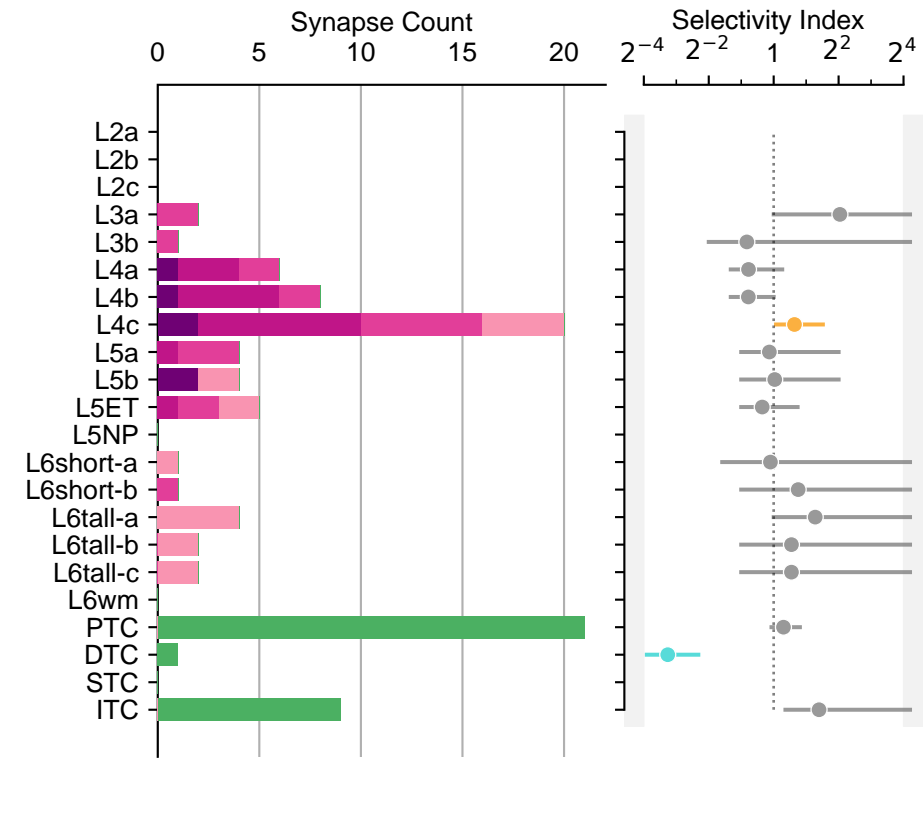

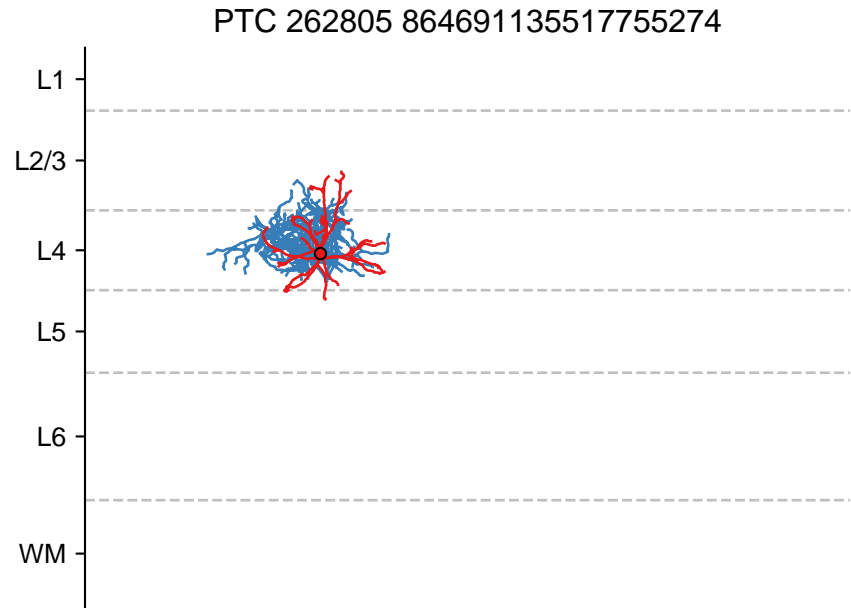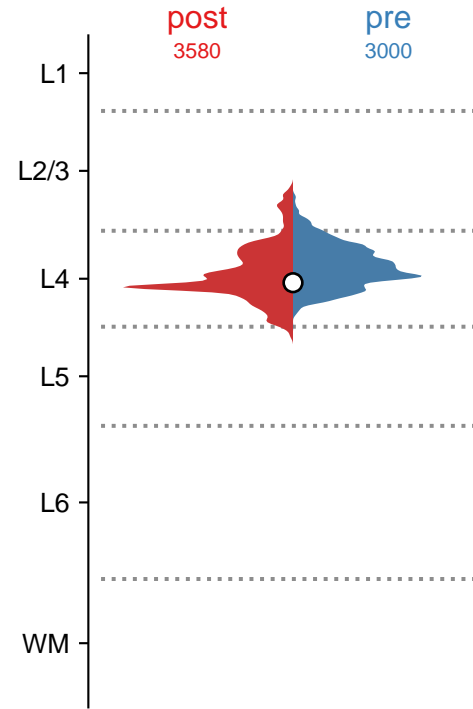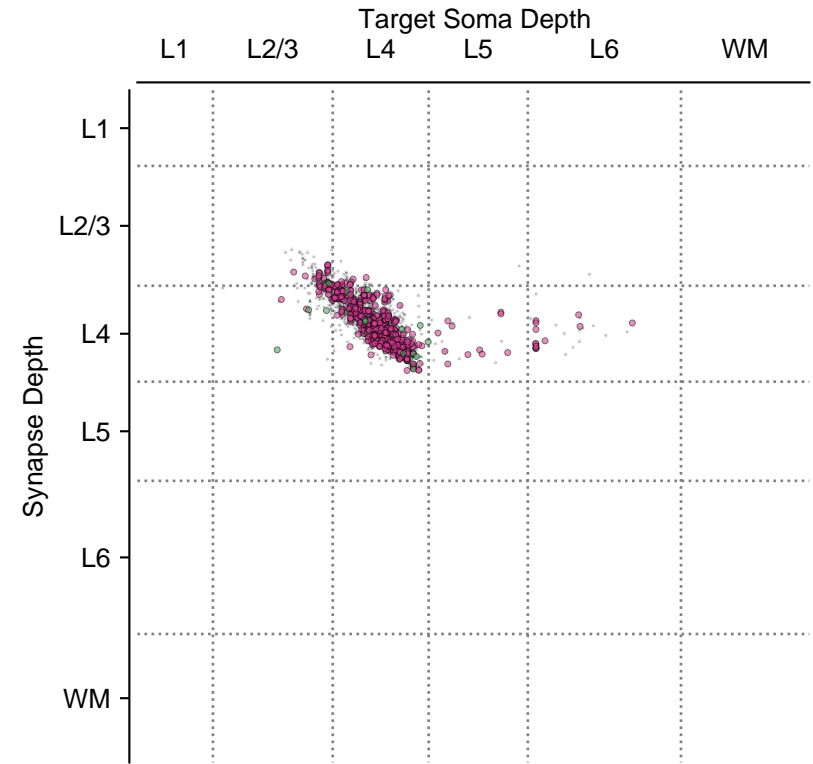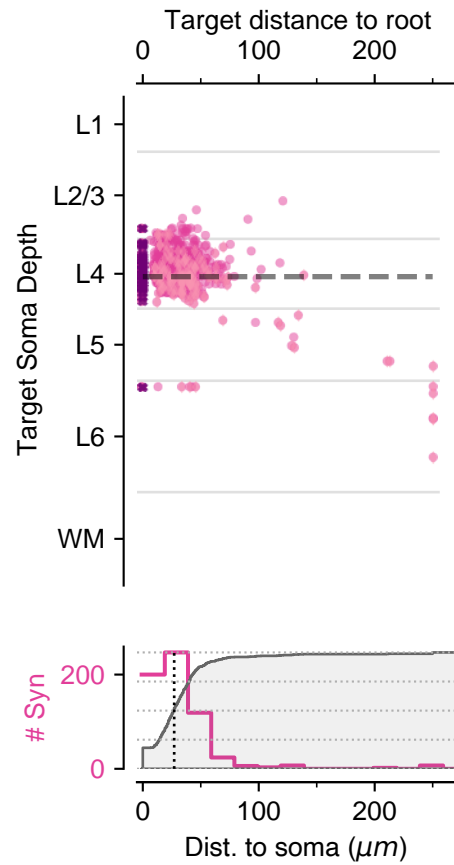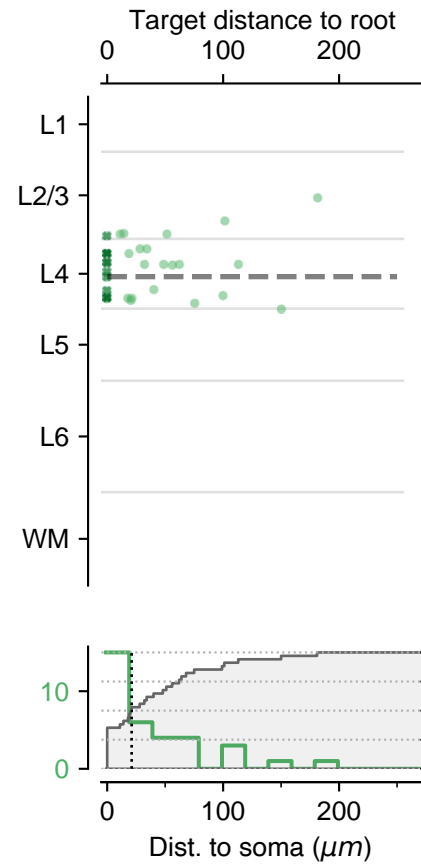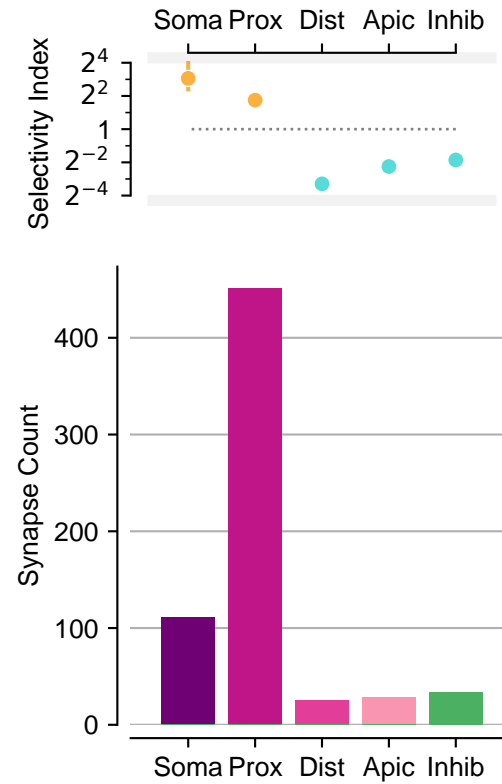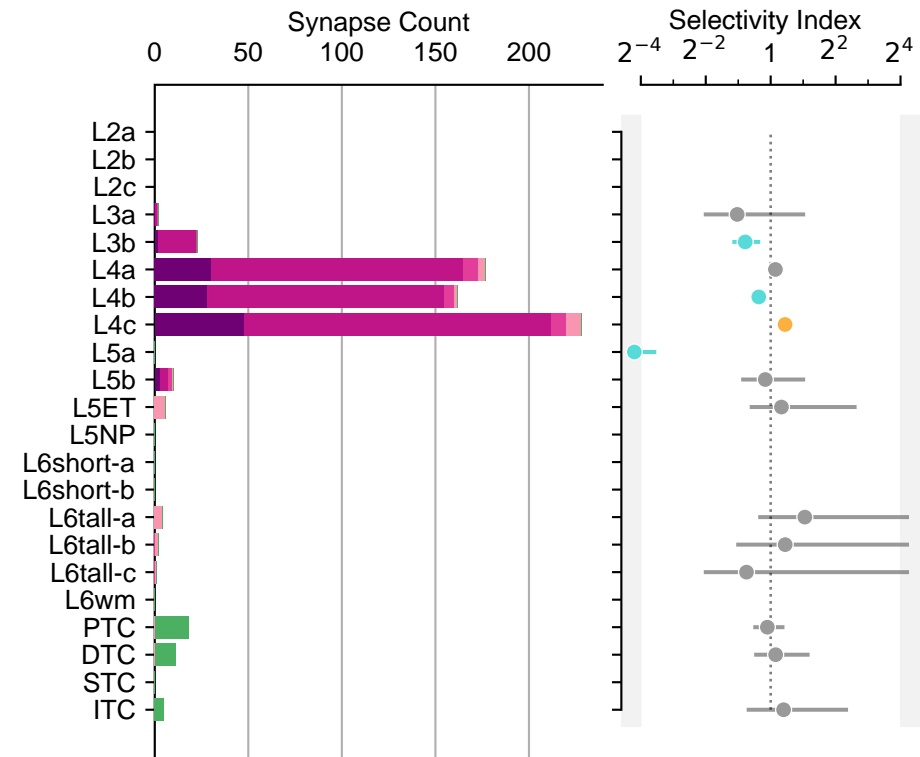

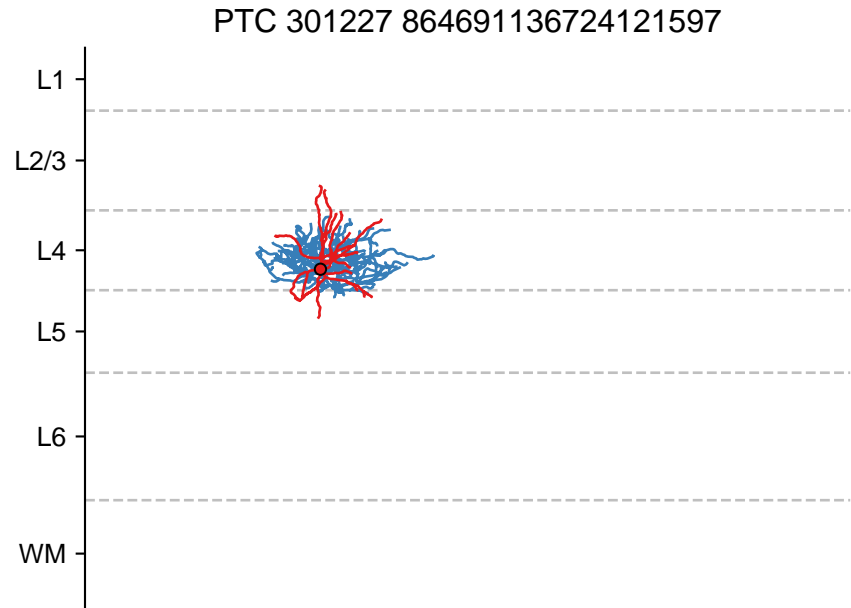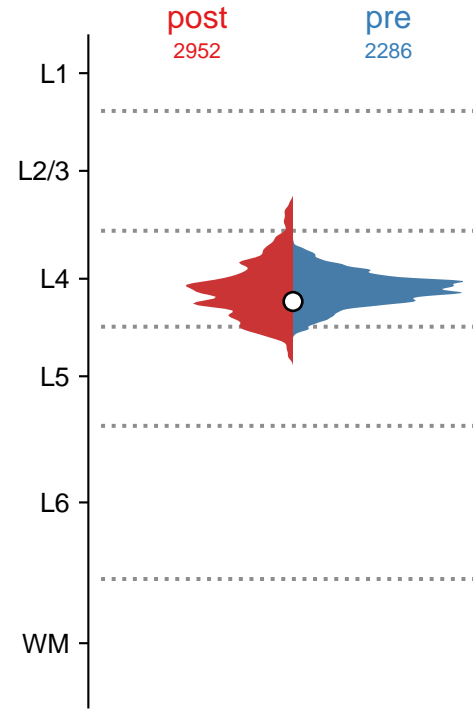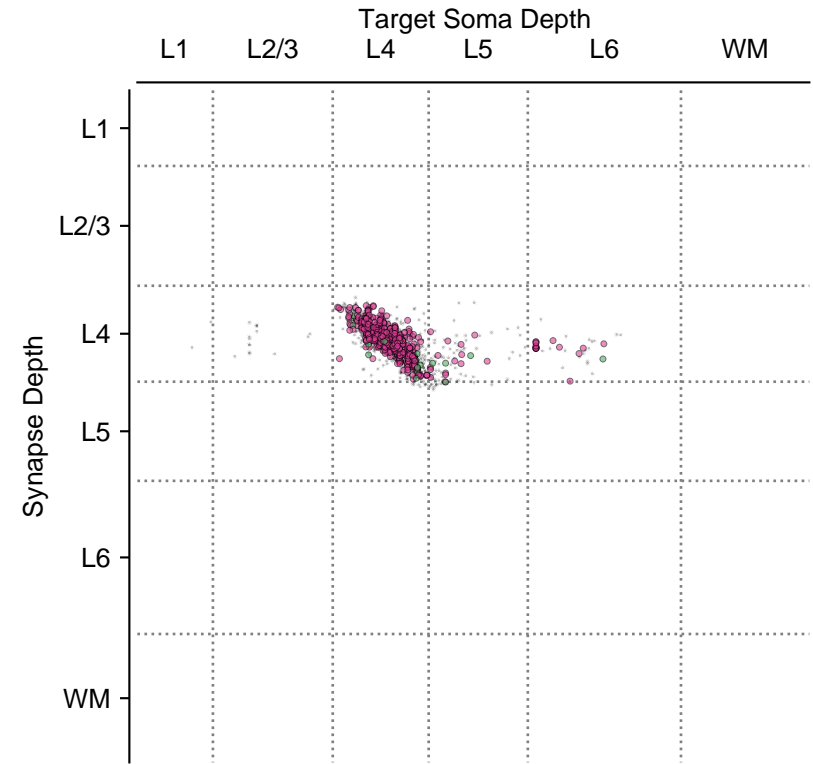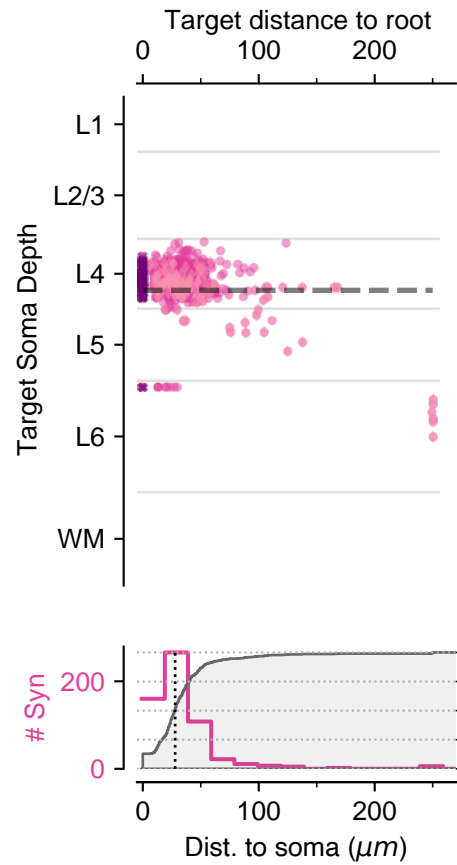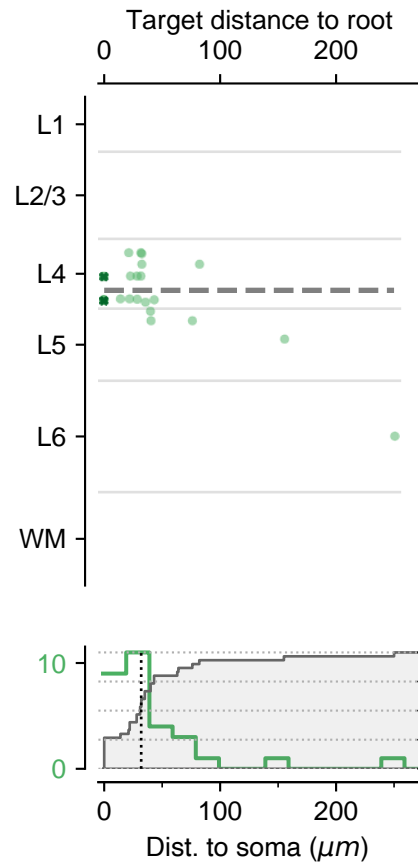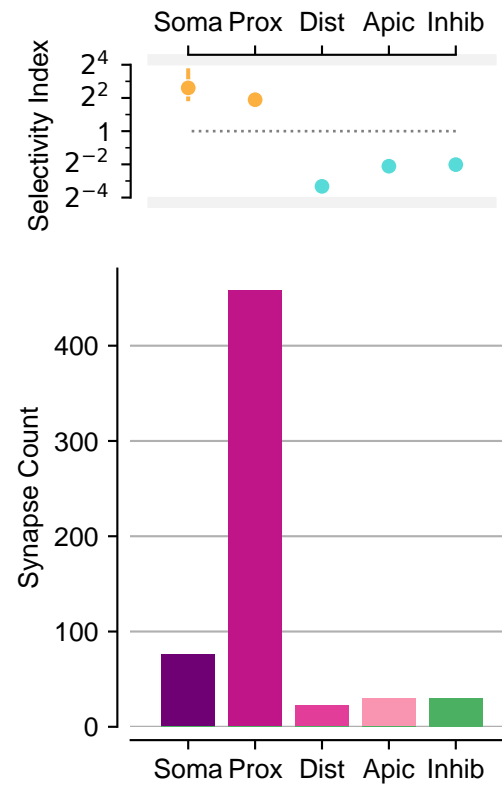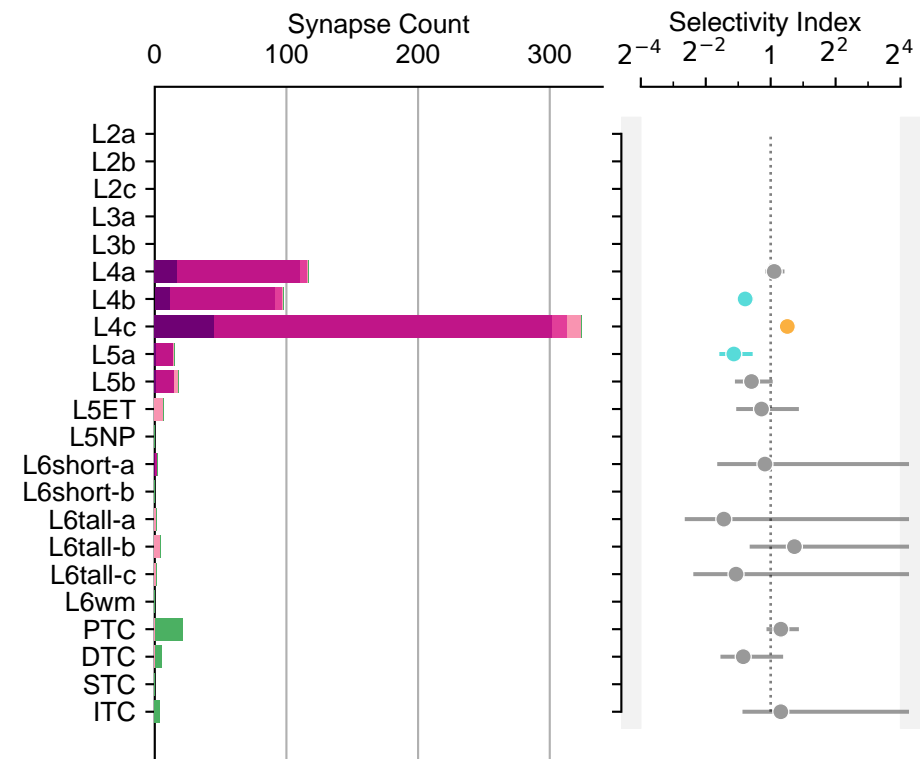



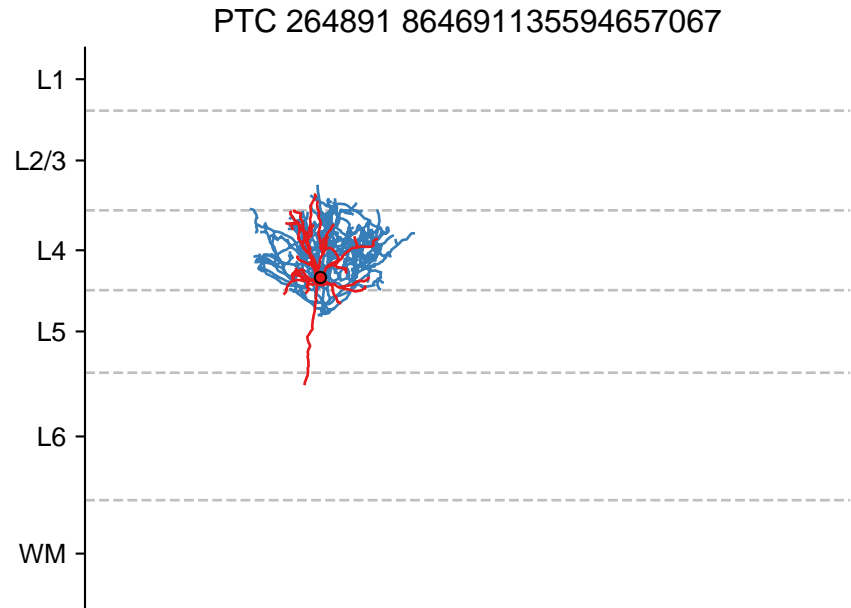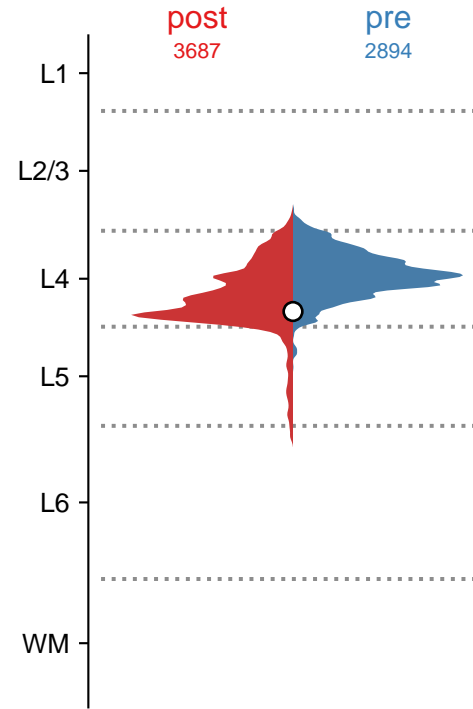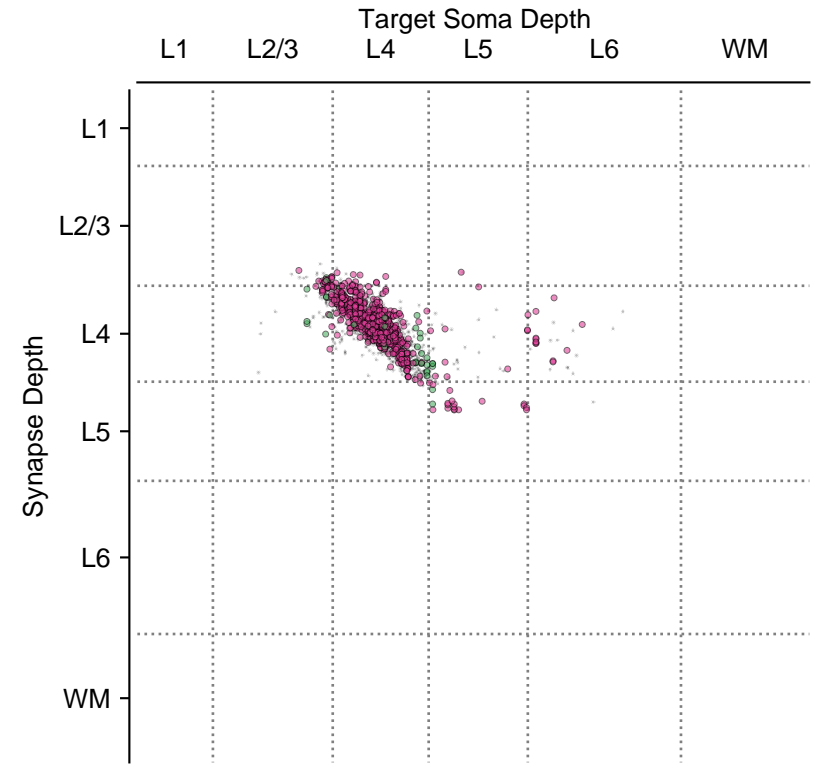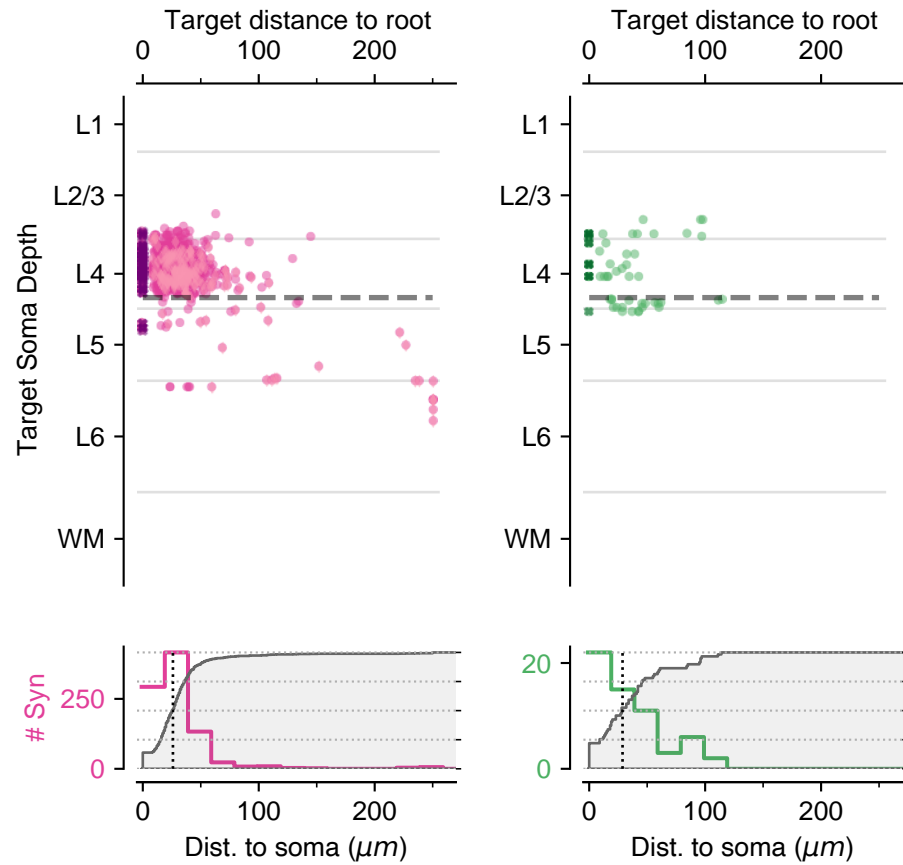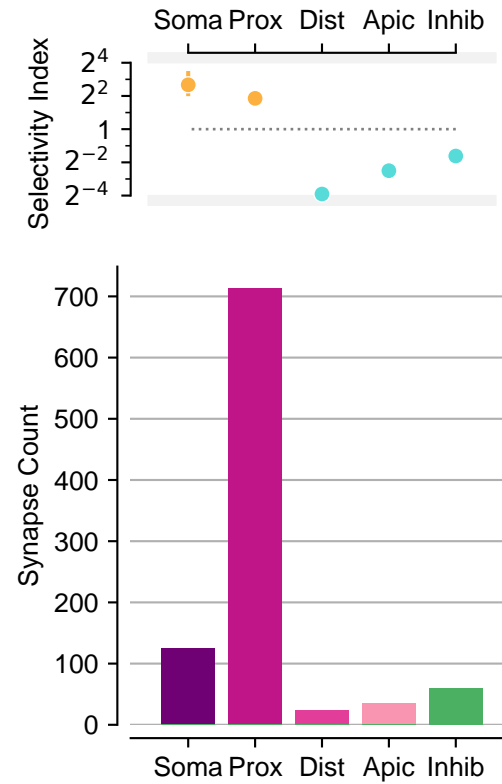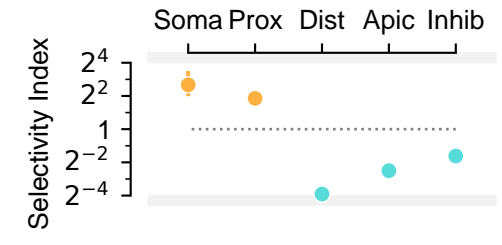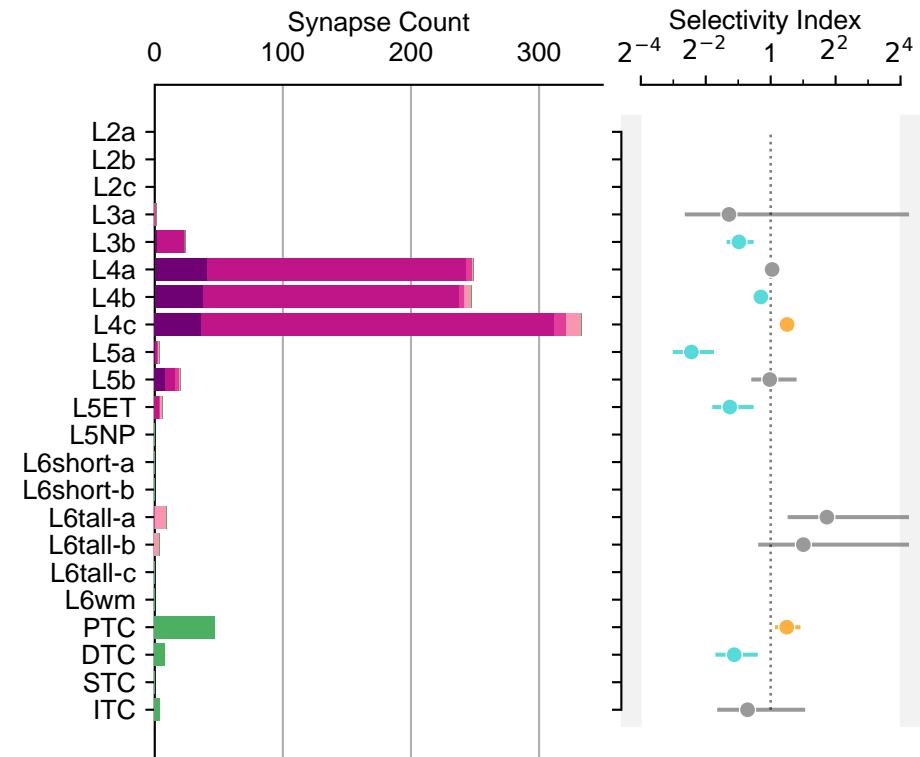

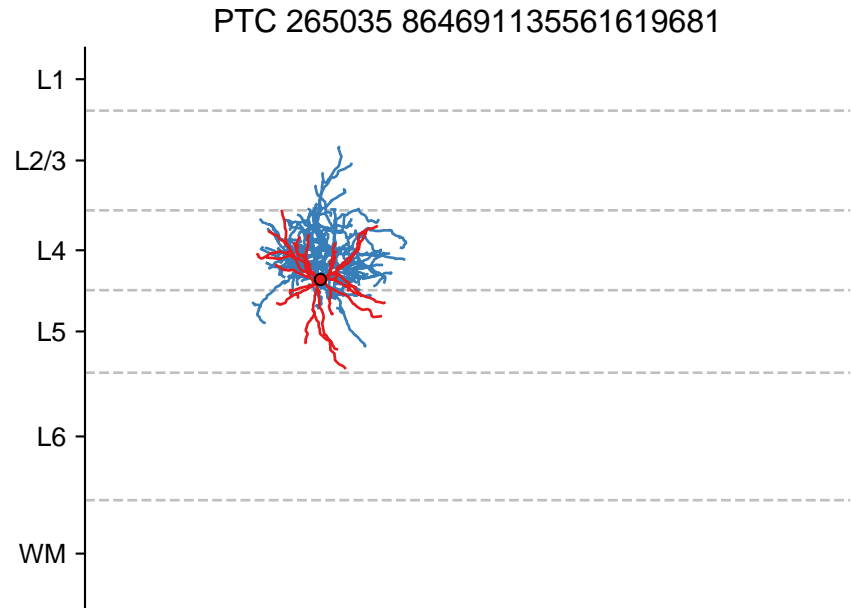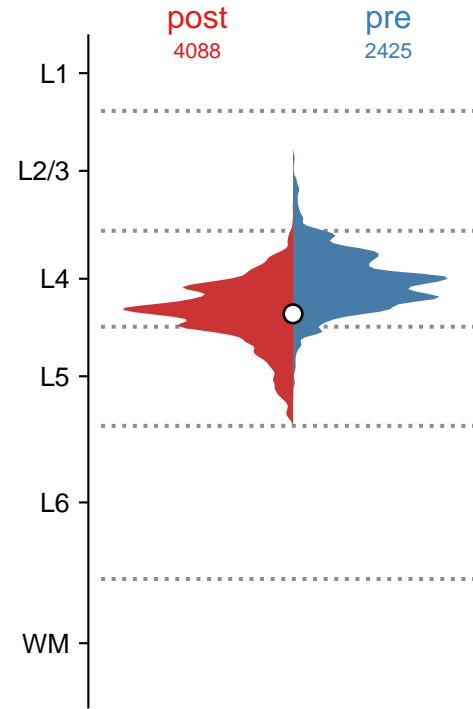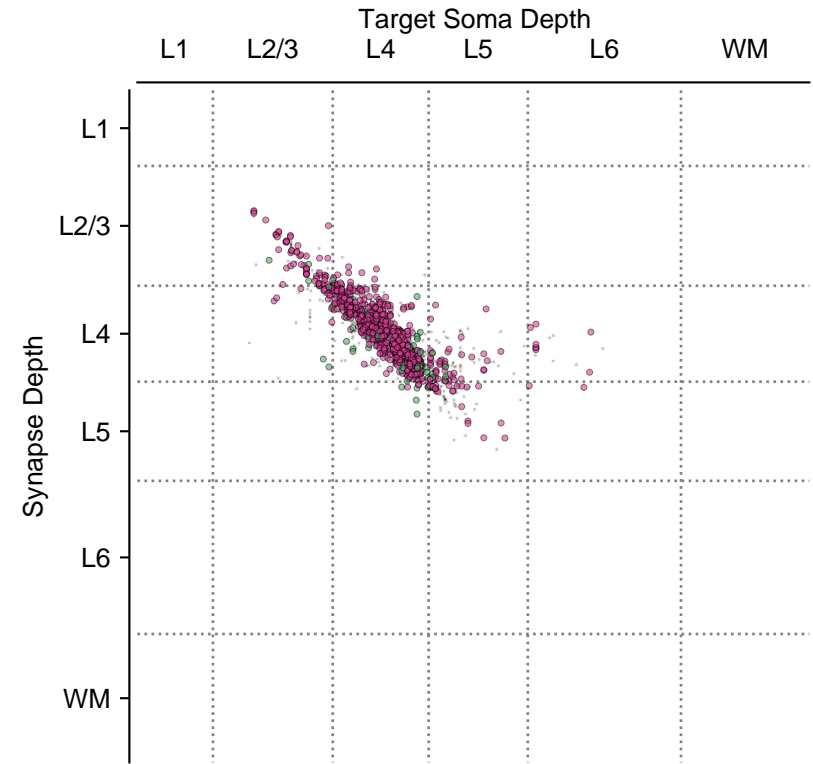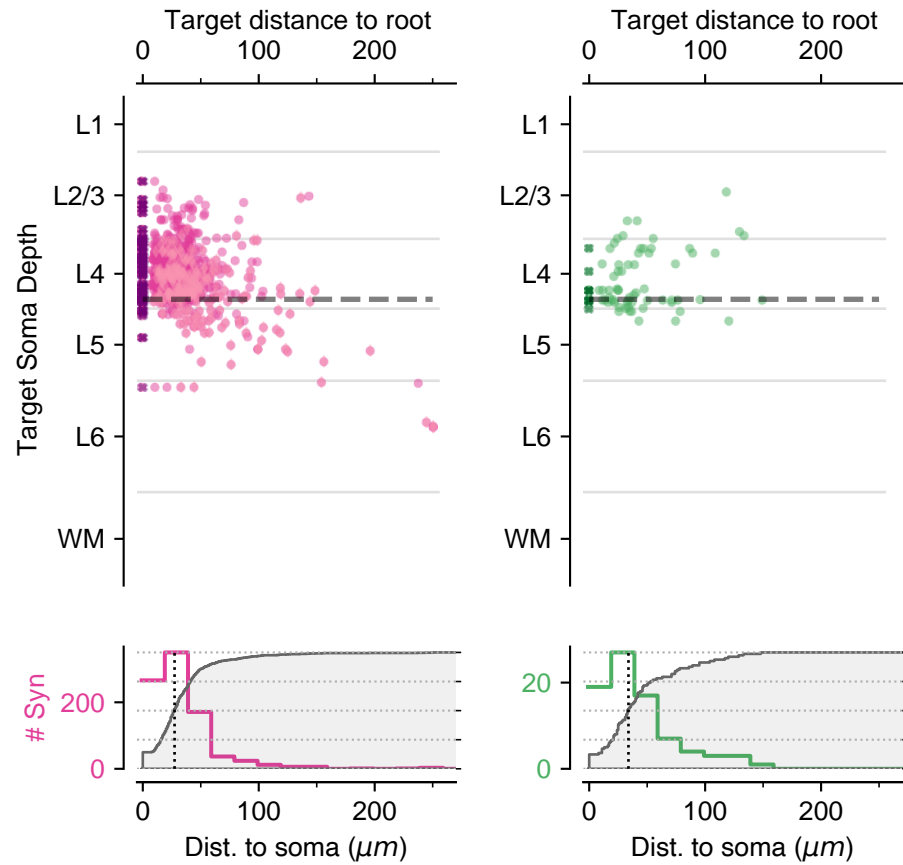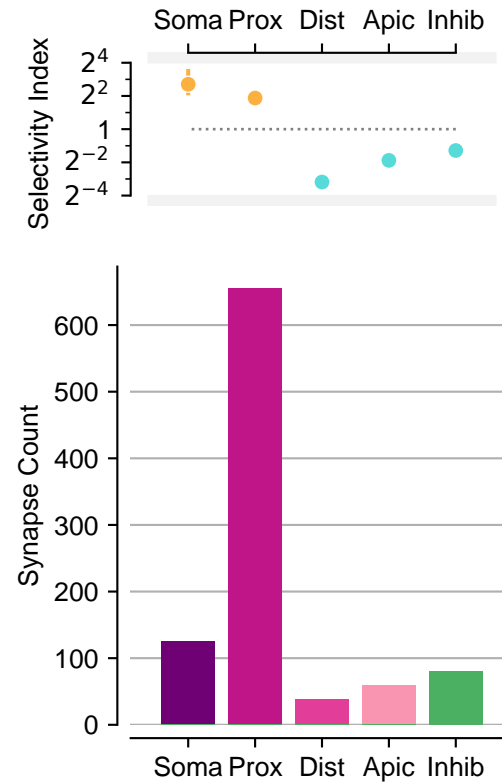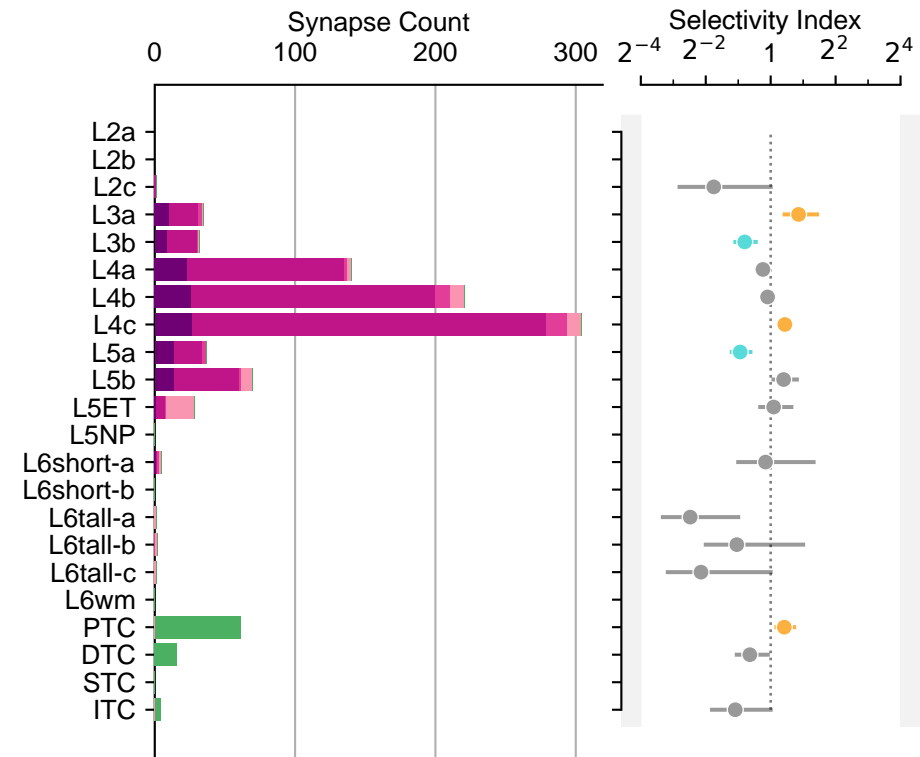

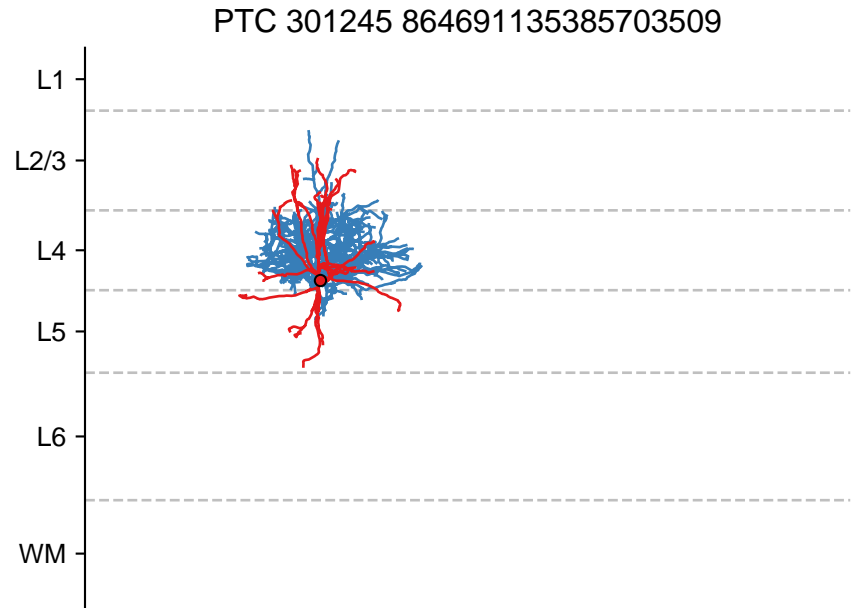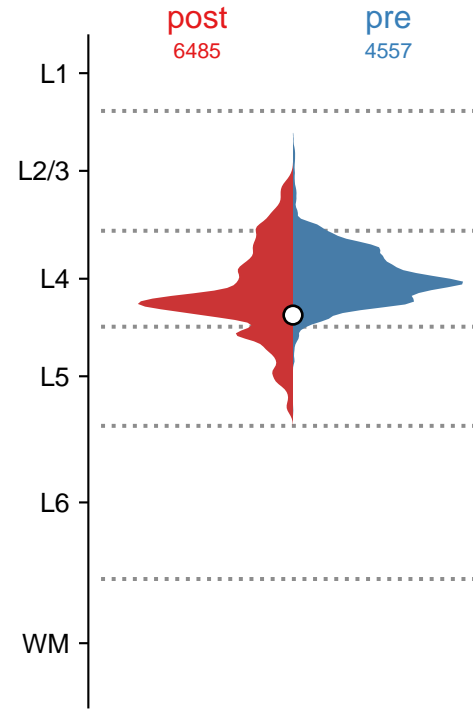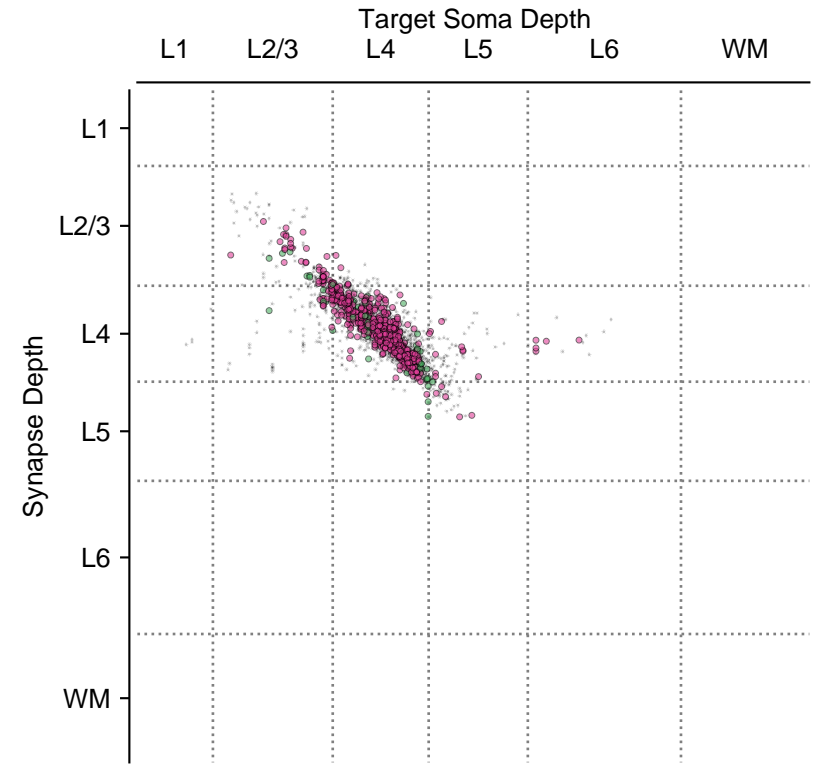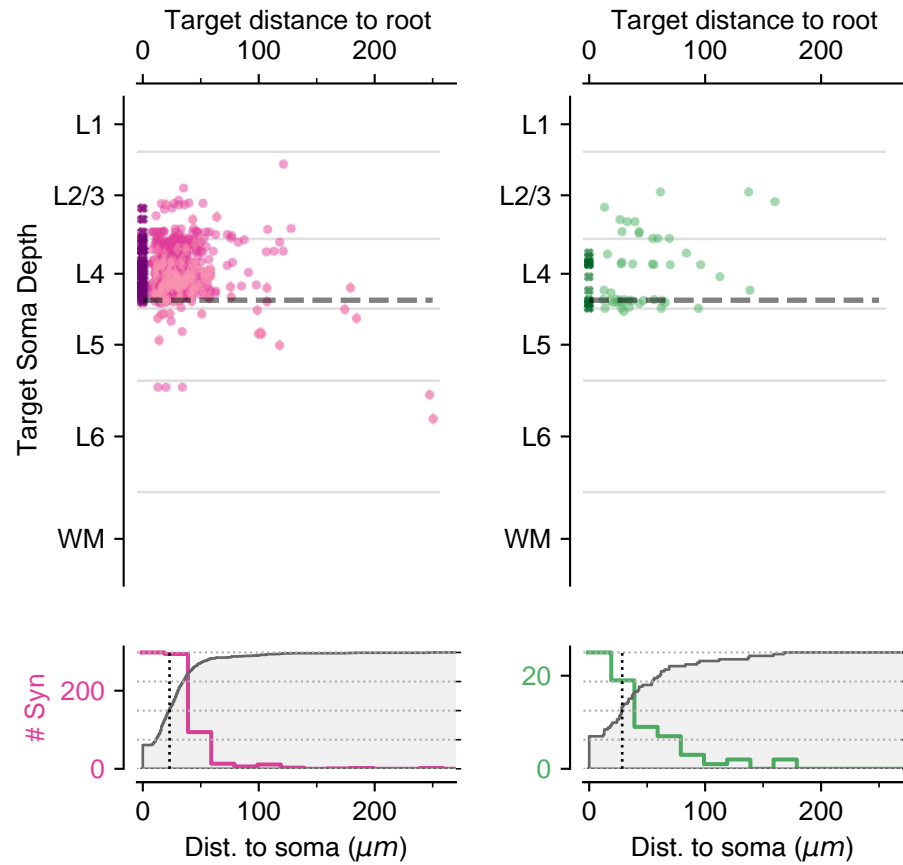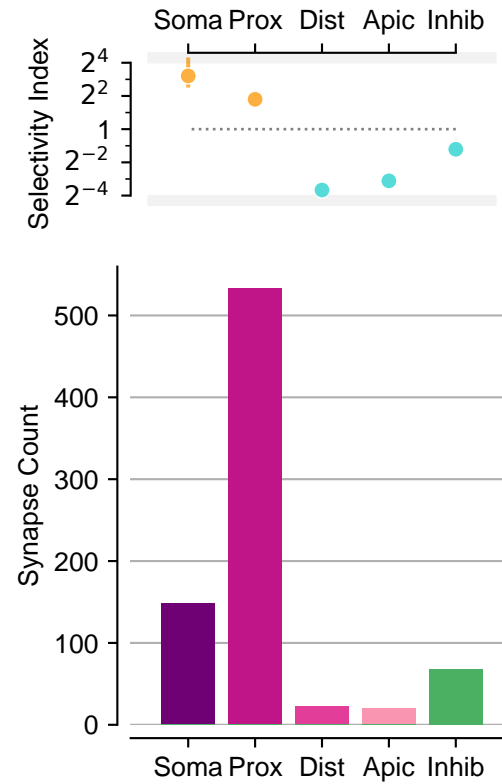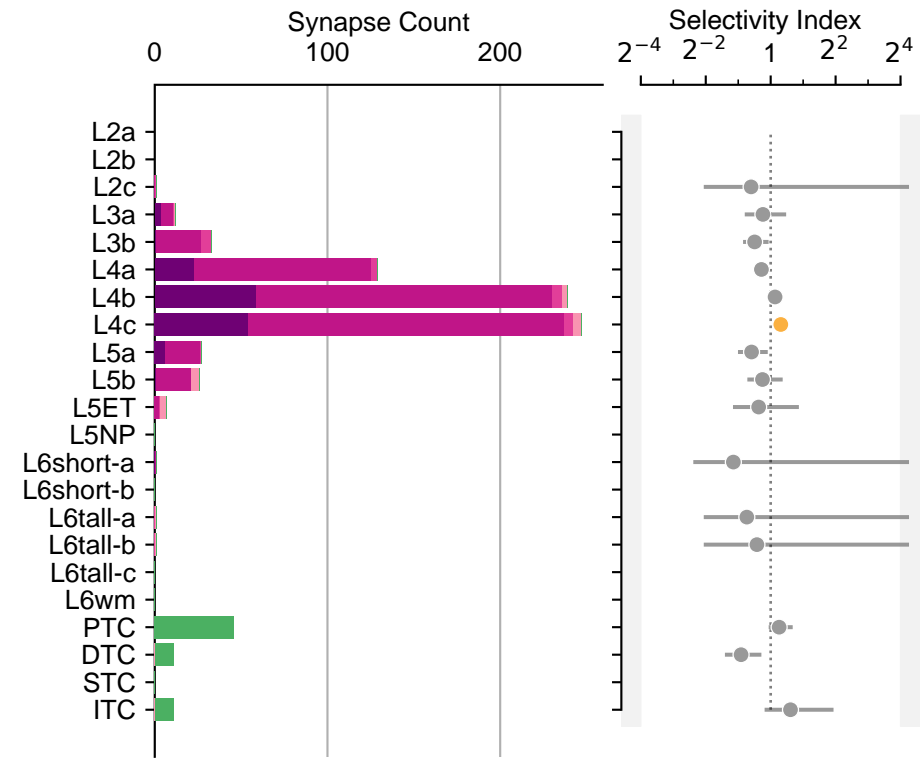

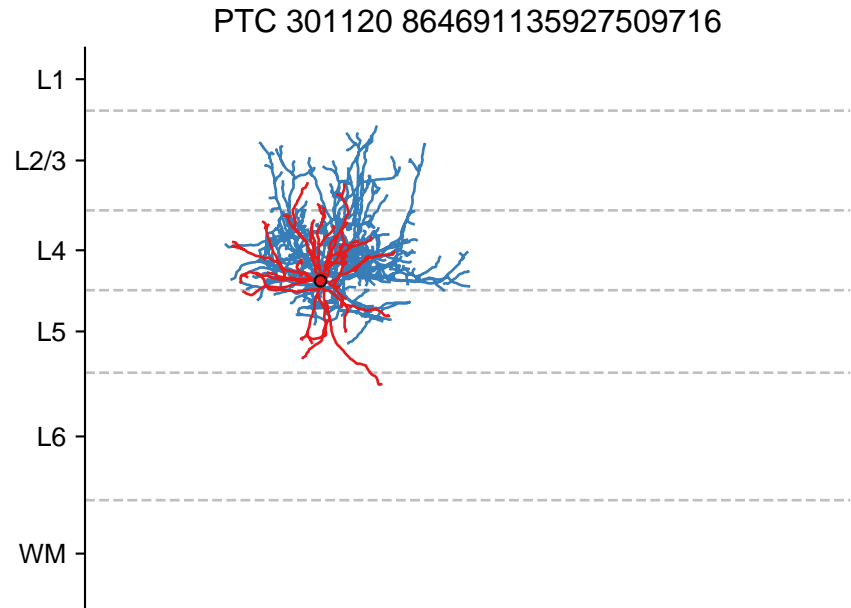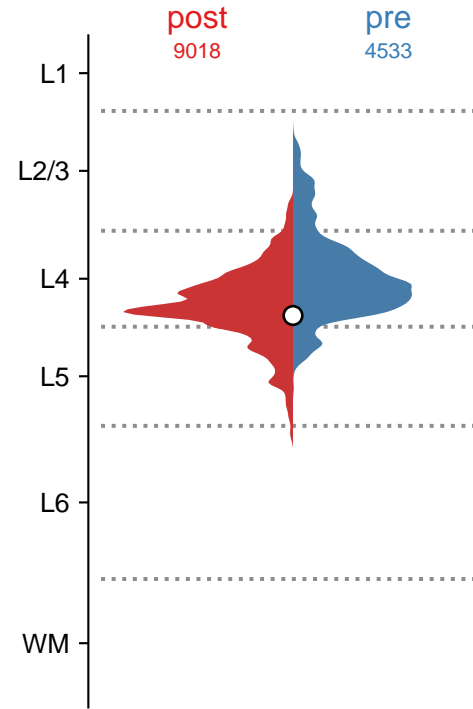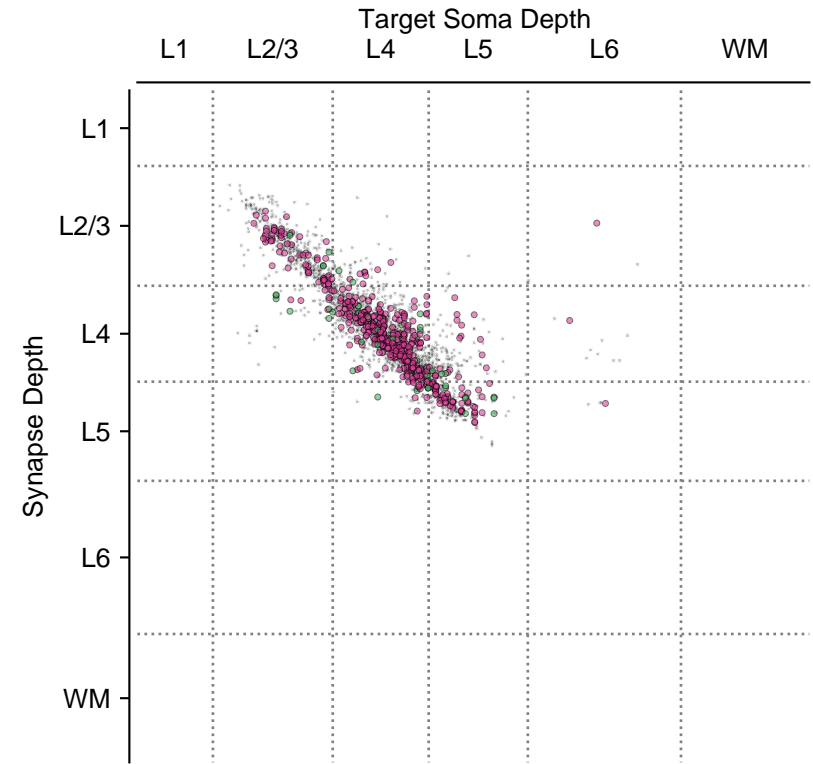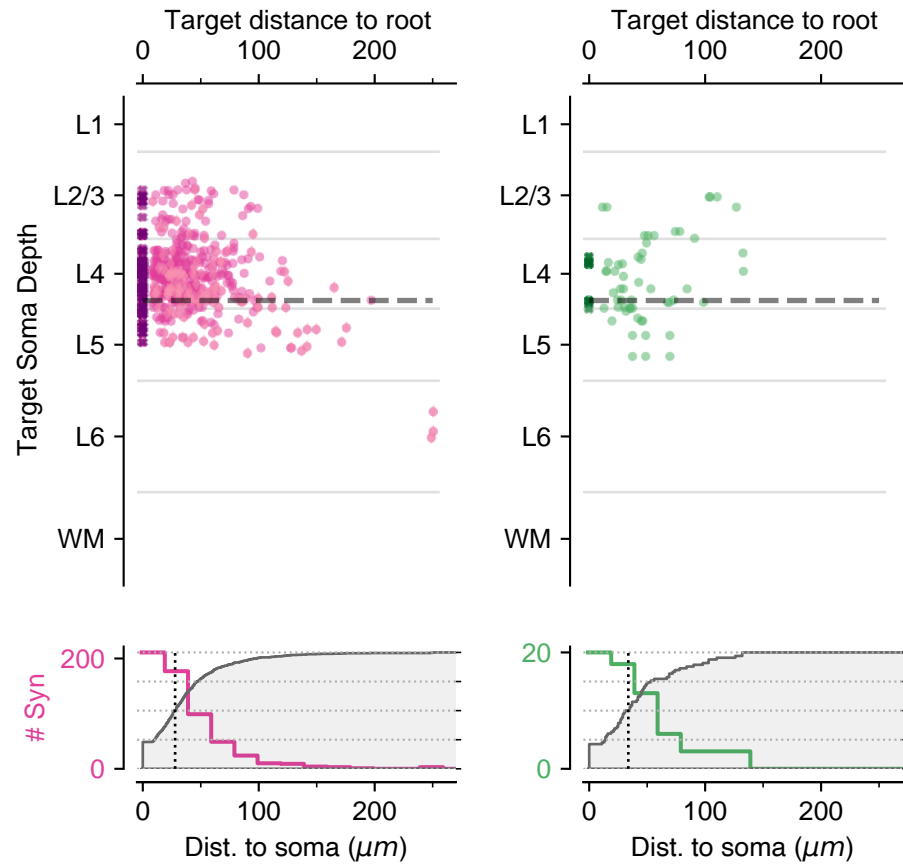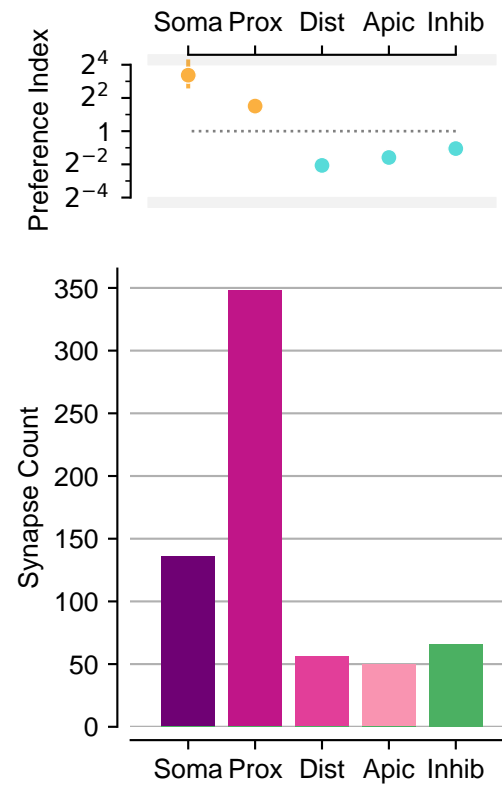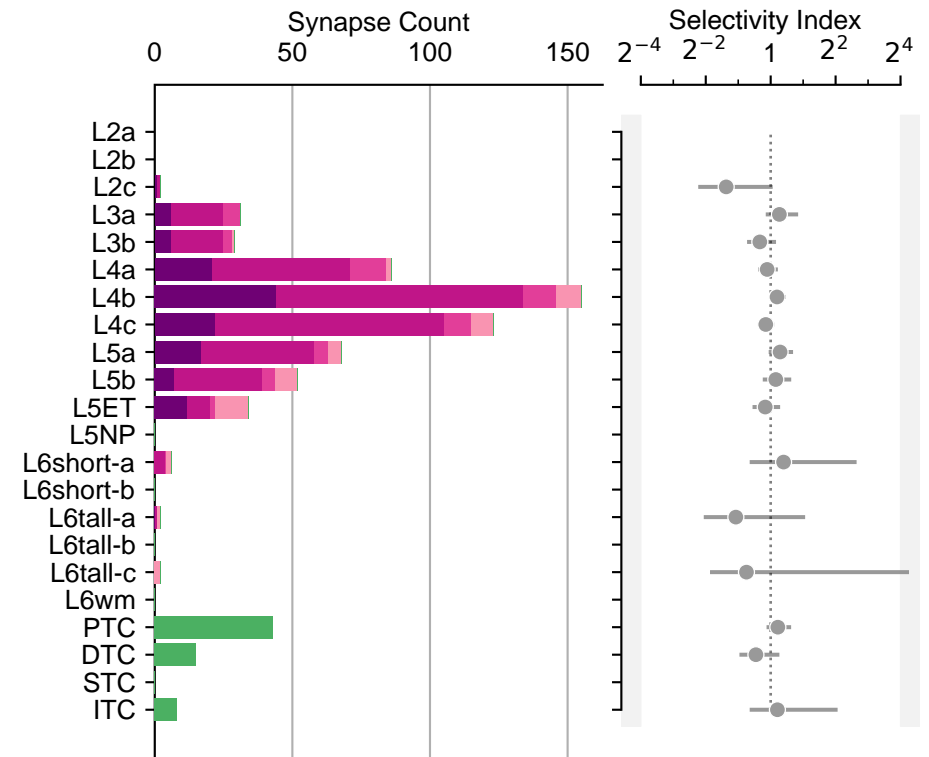

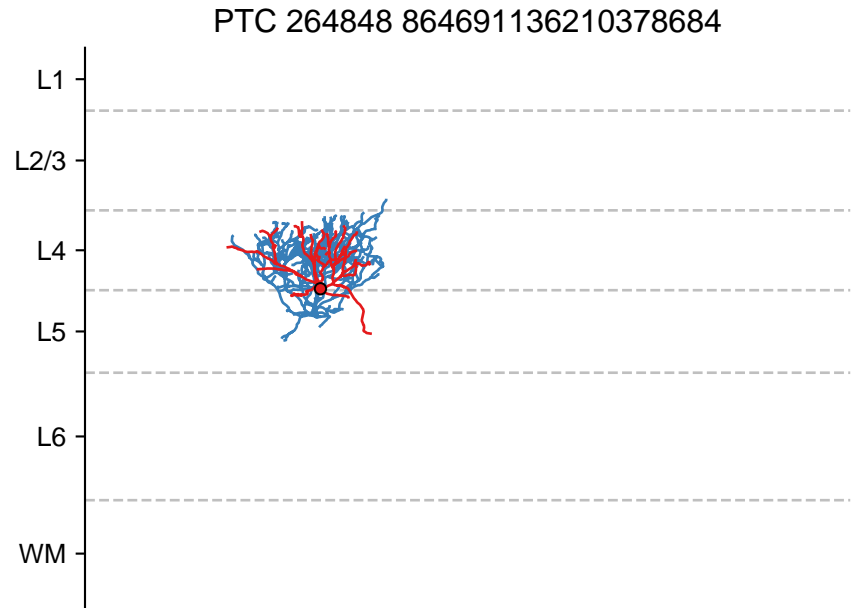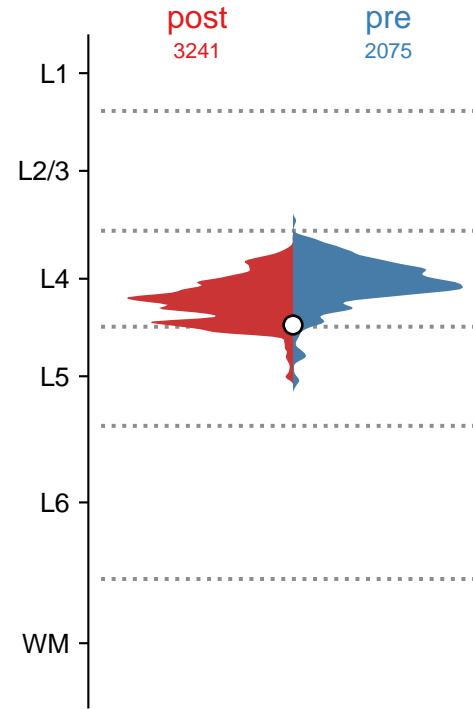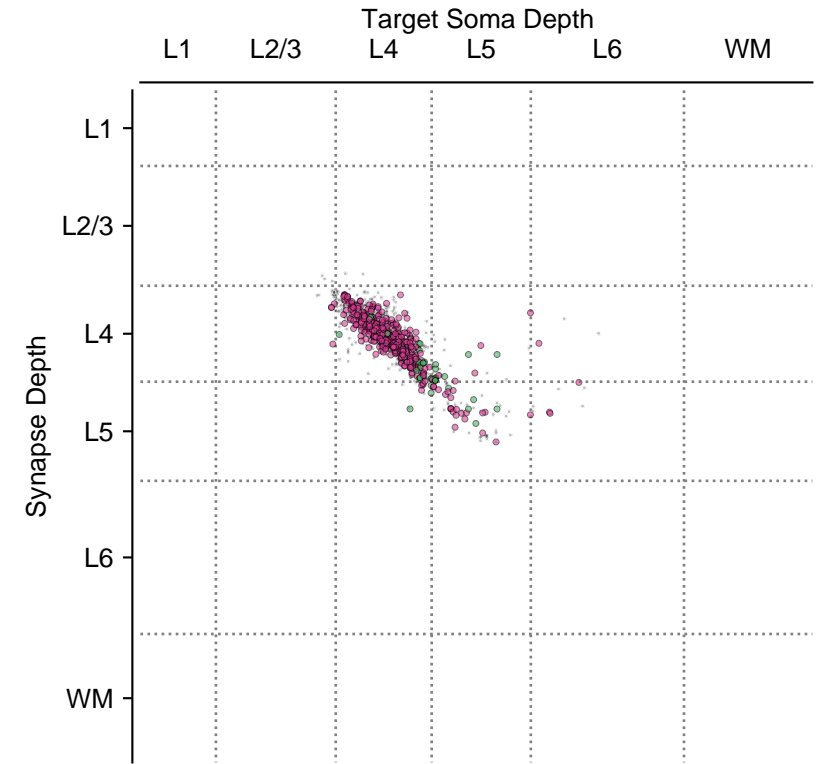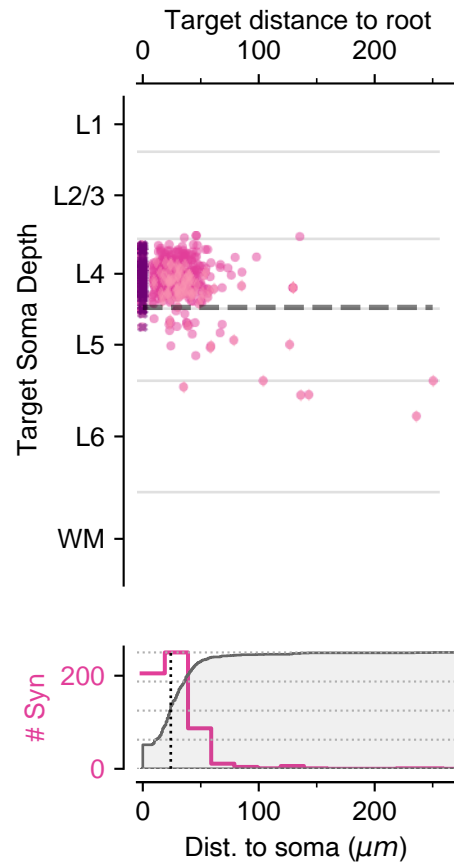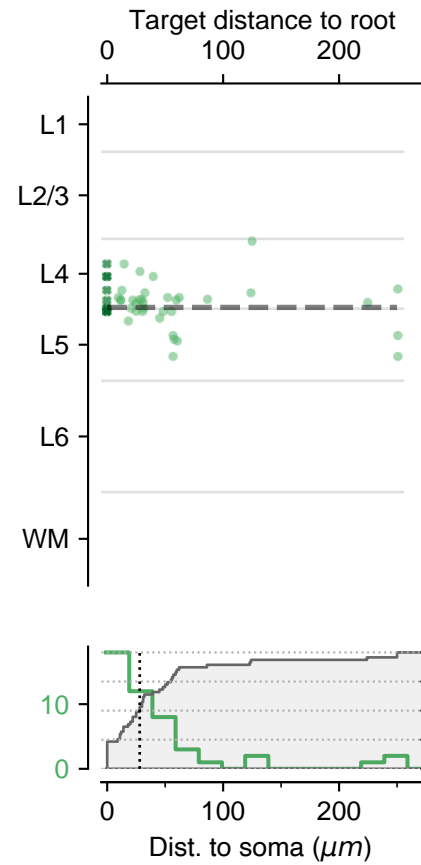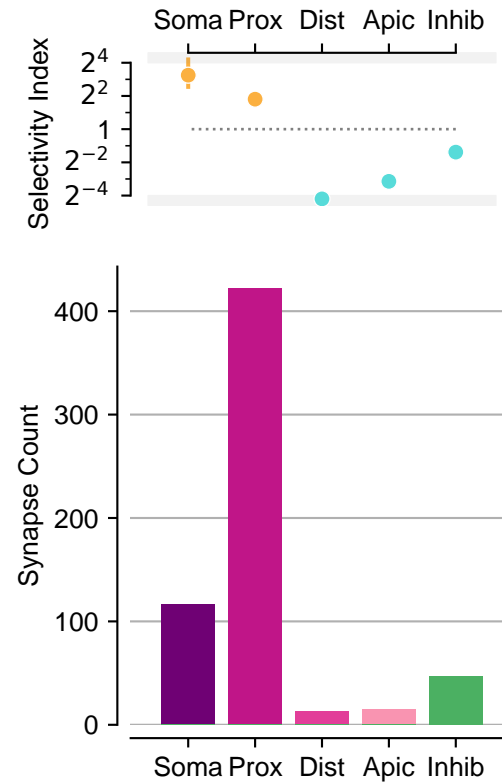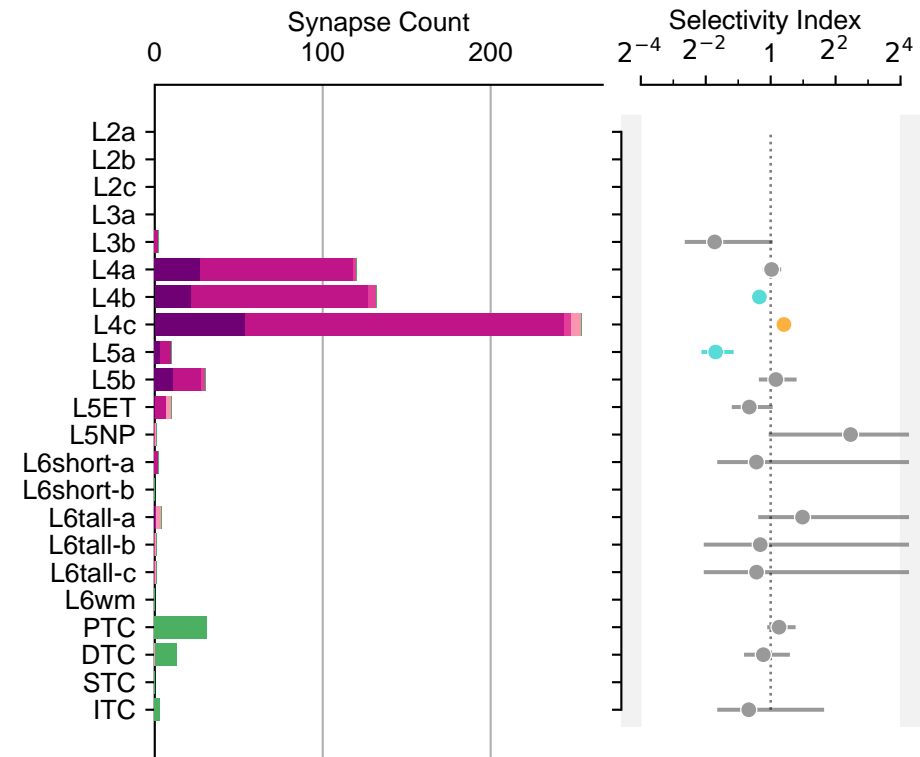

# Motif Group 8

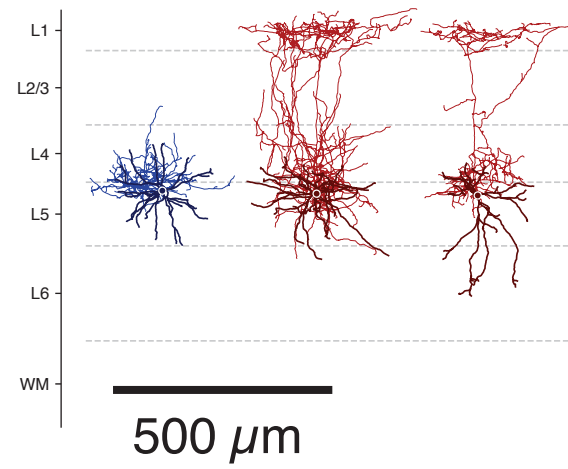

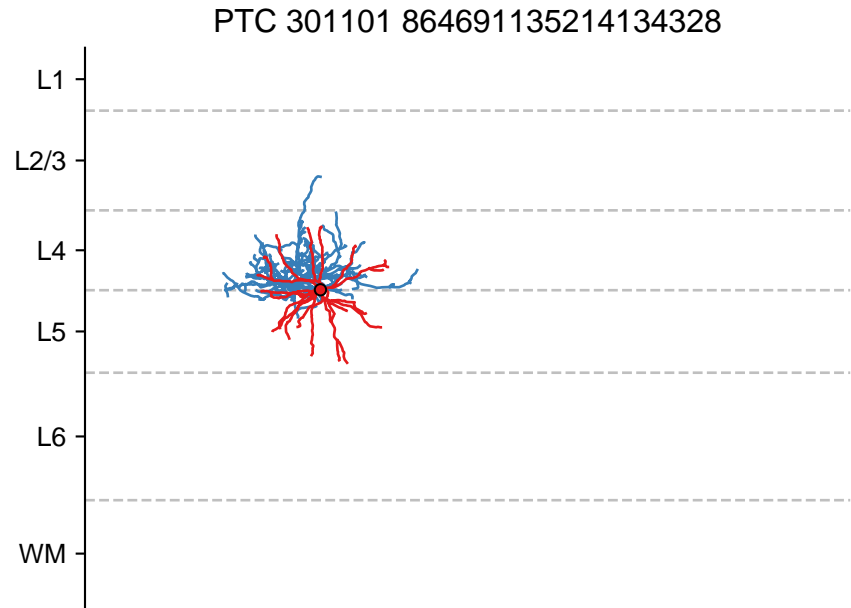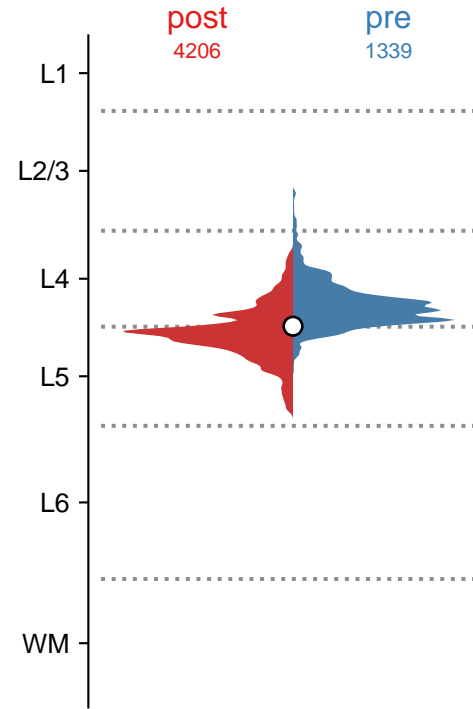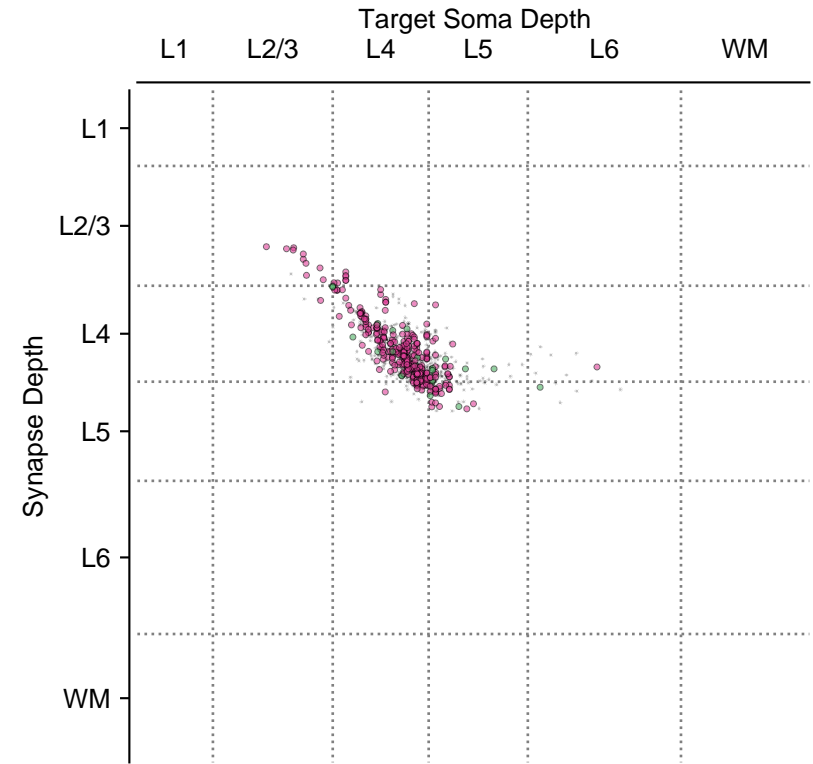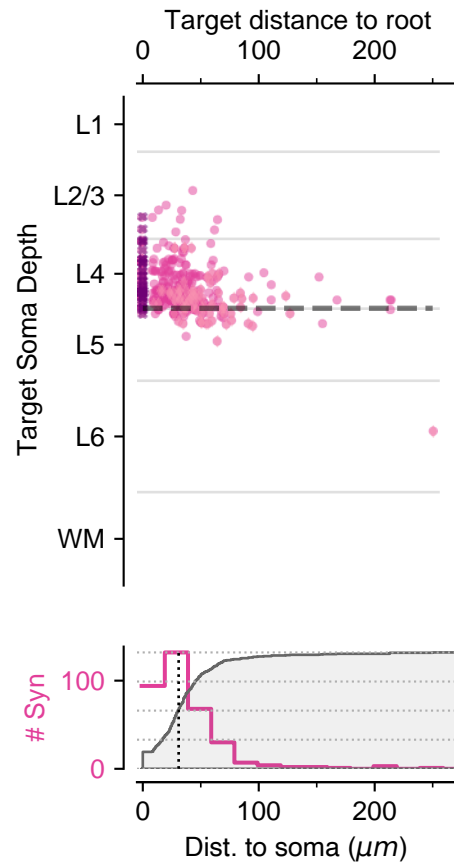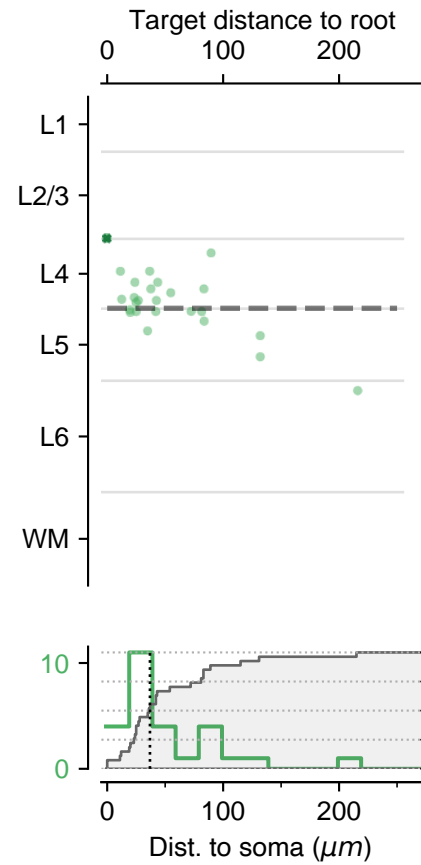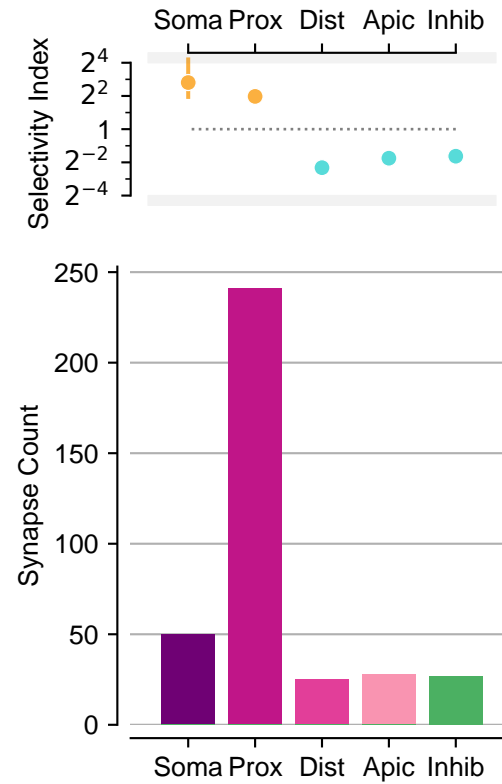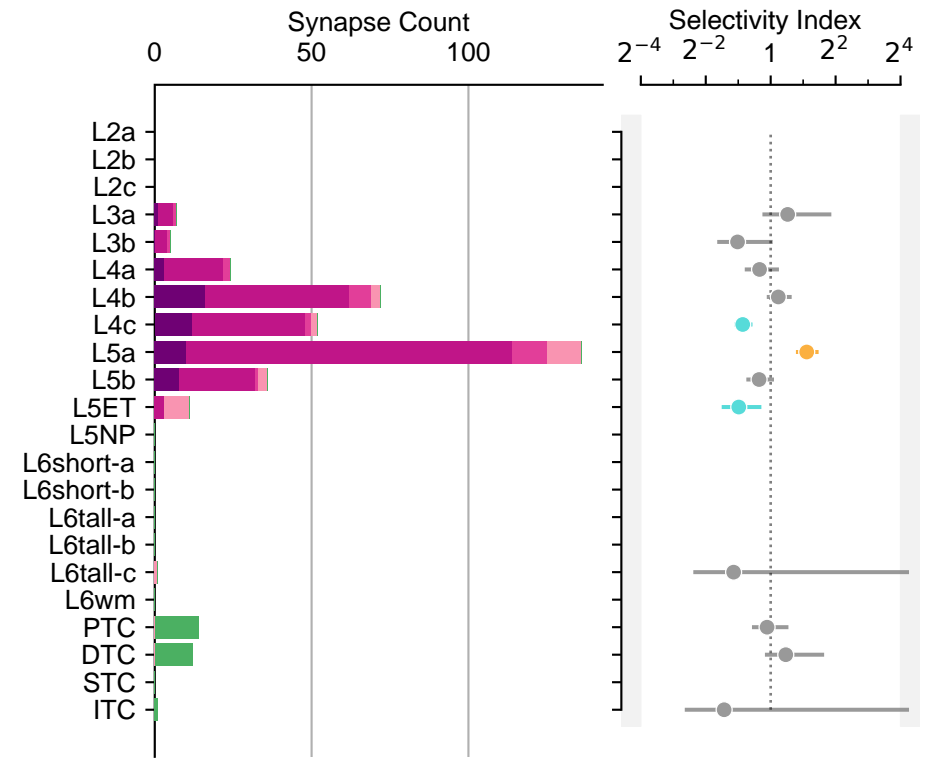

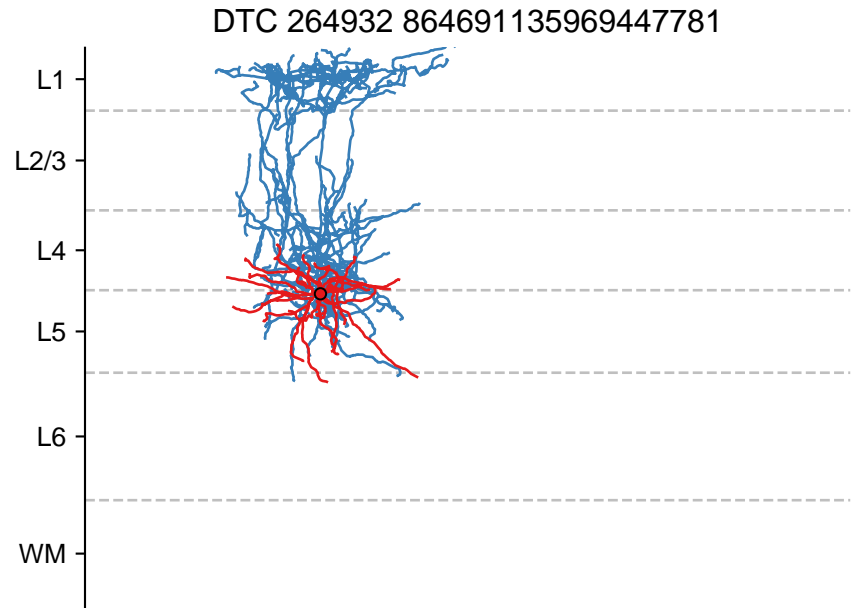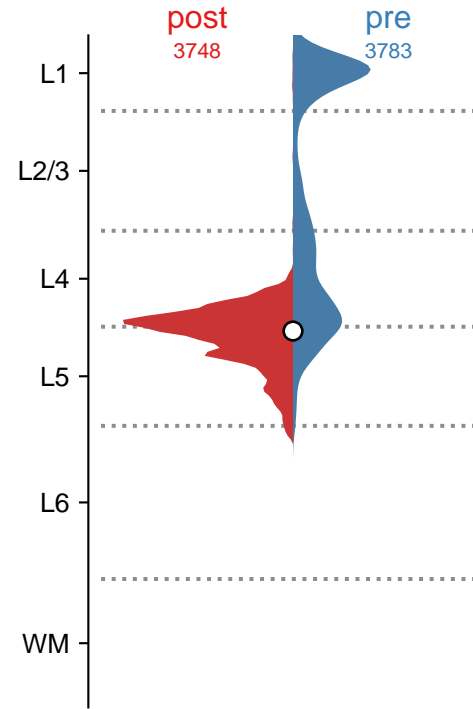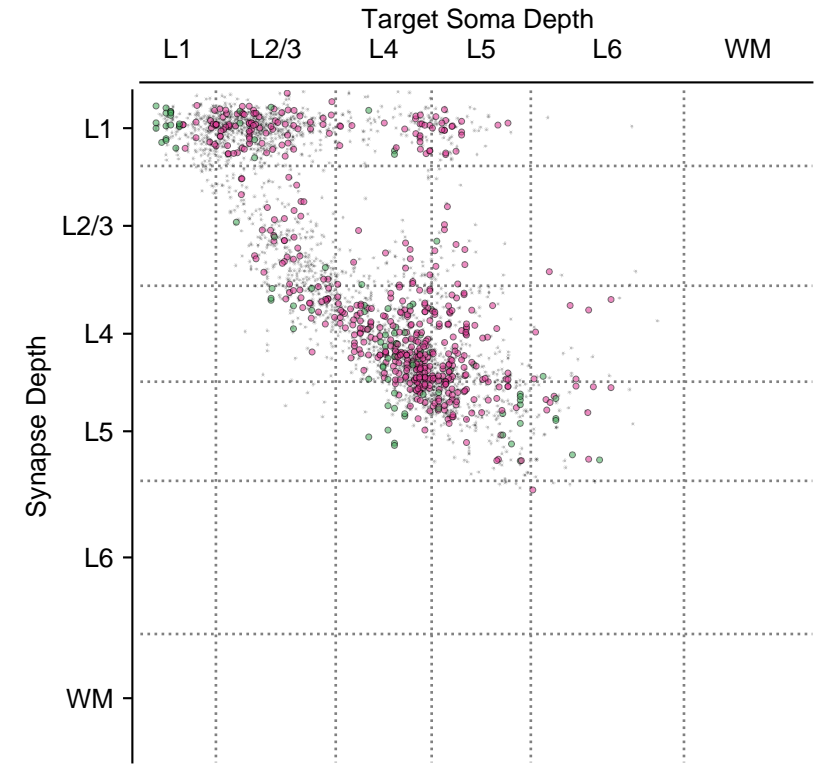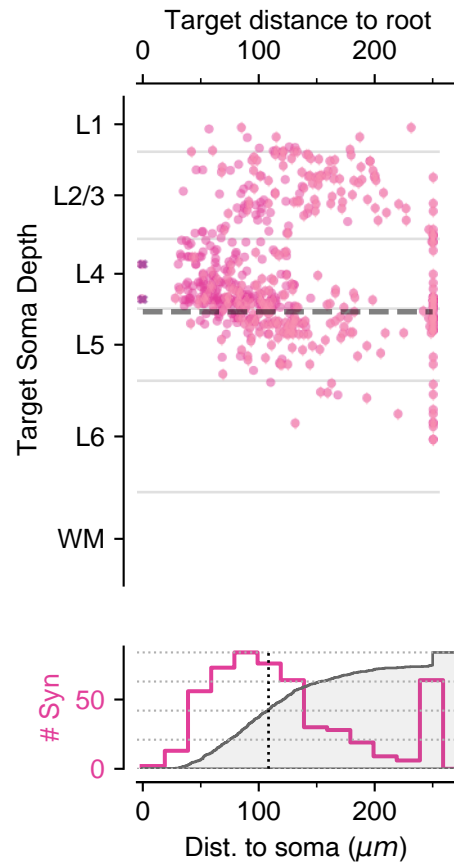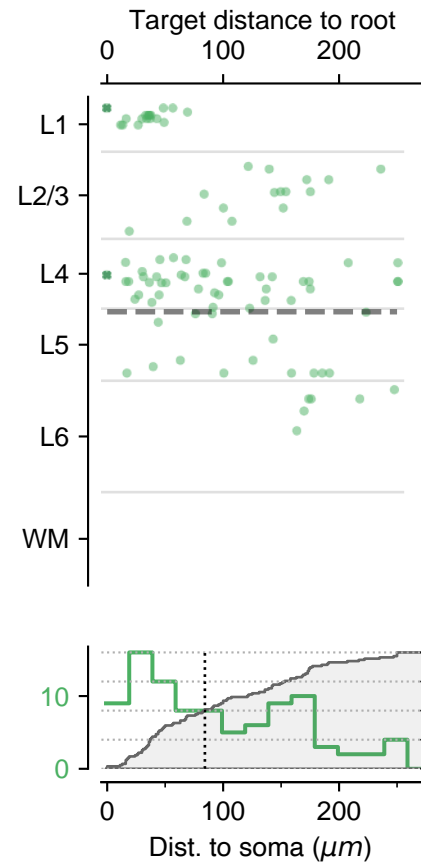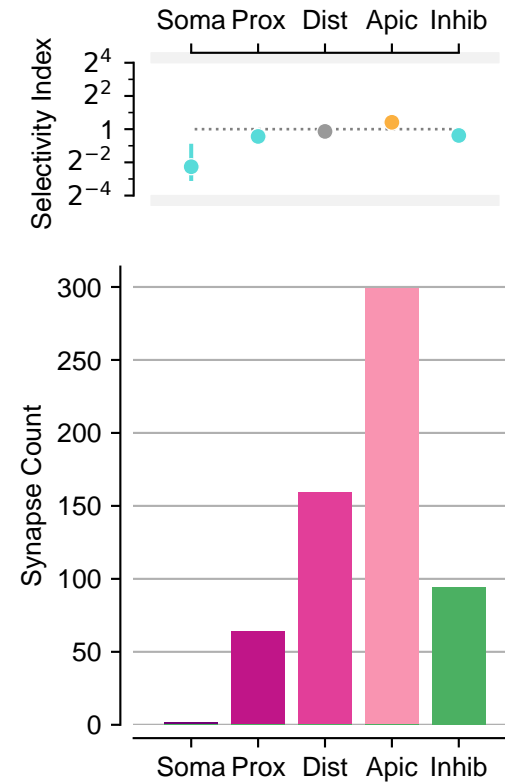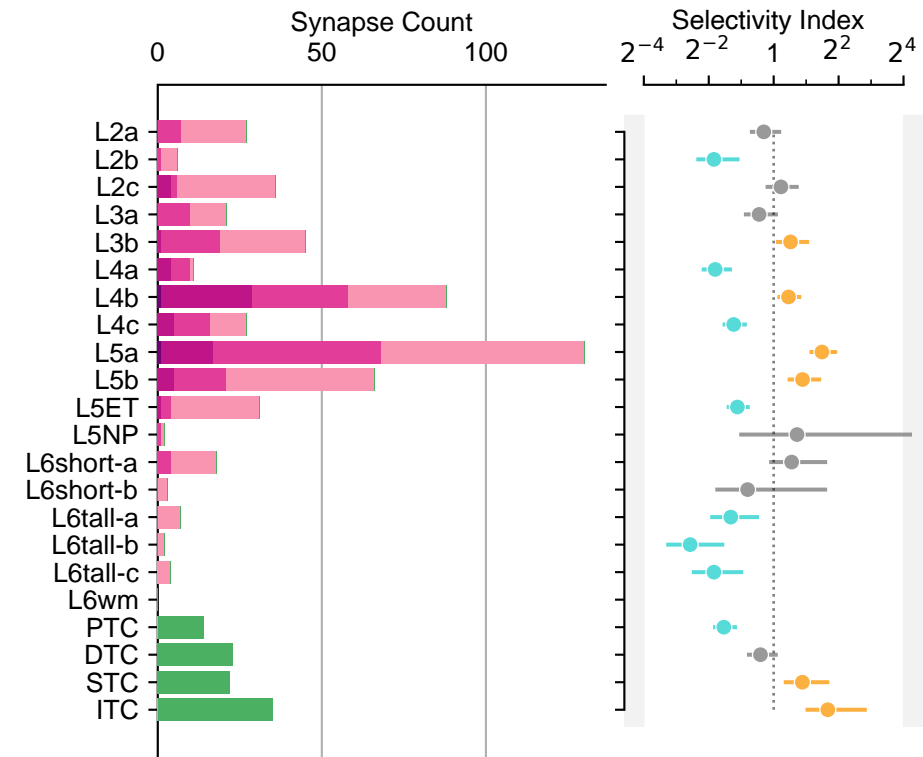



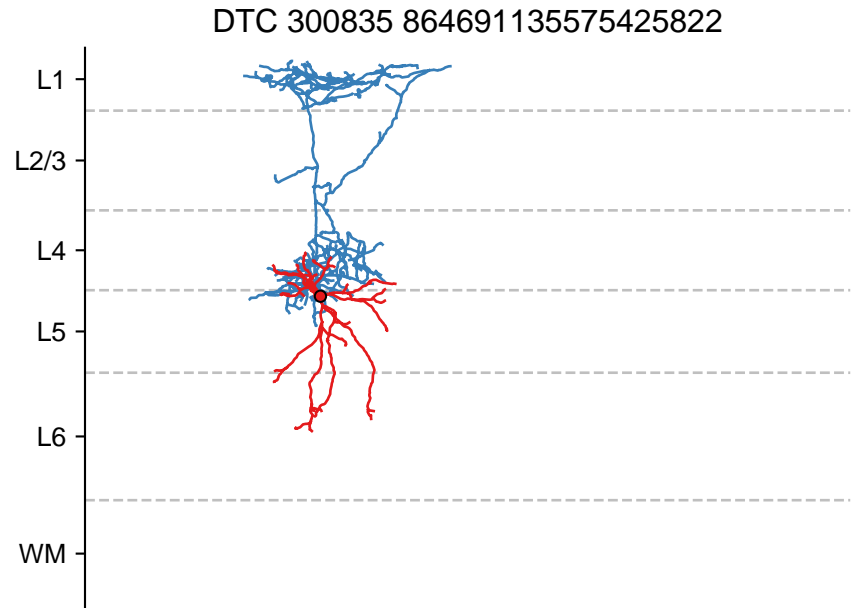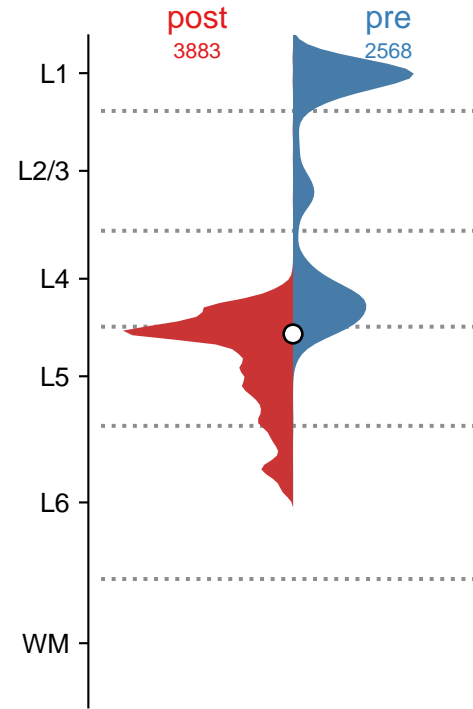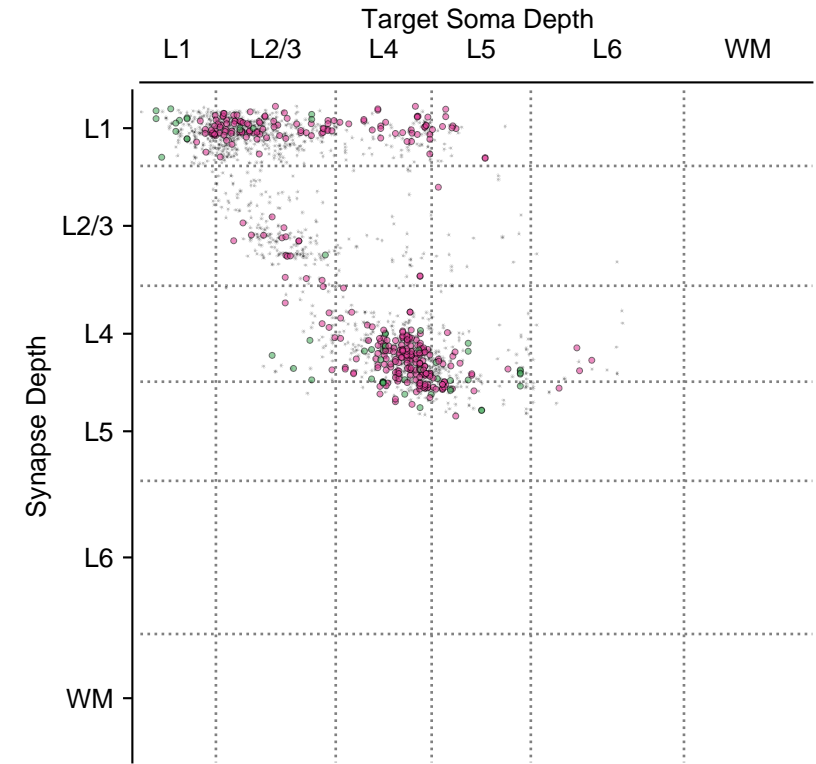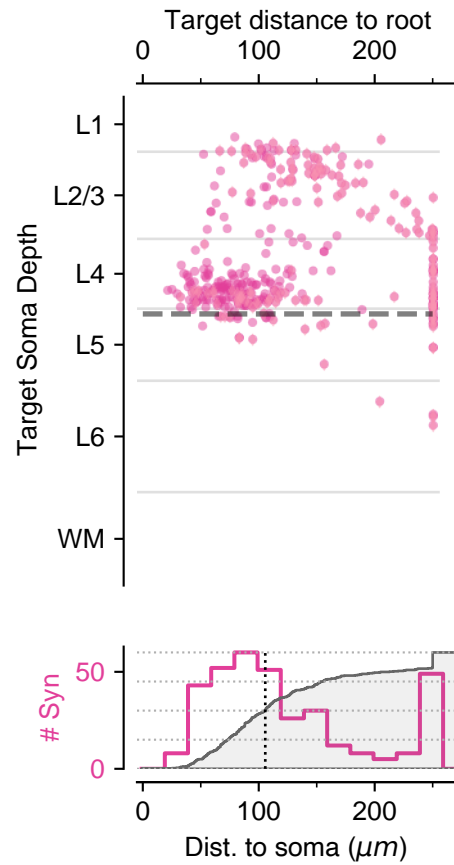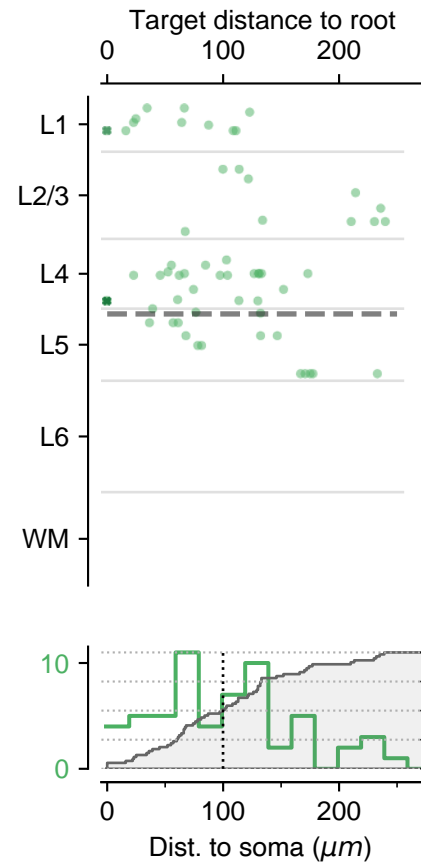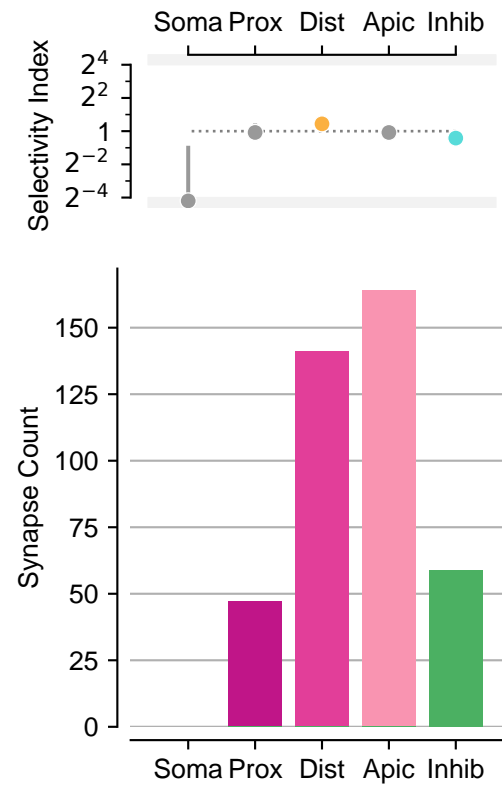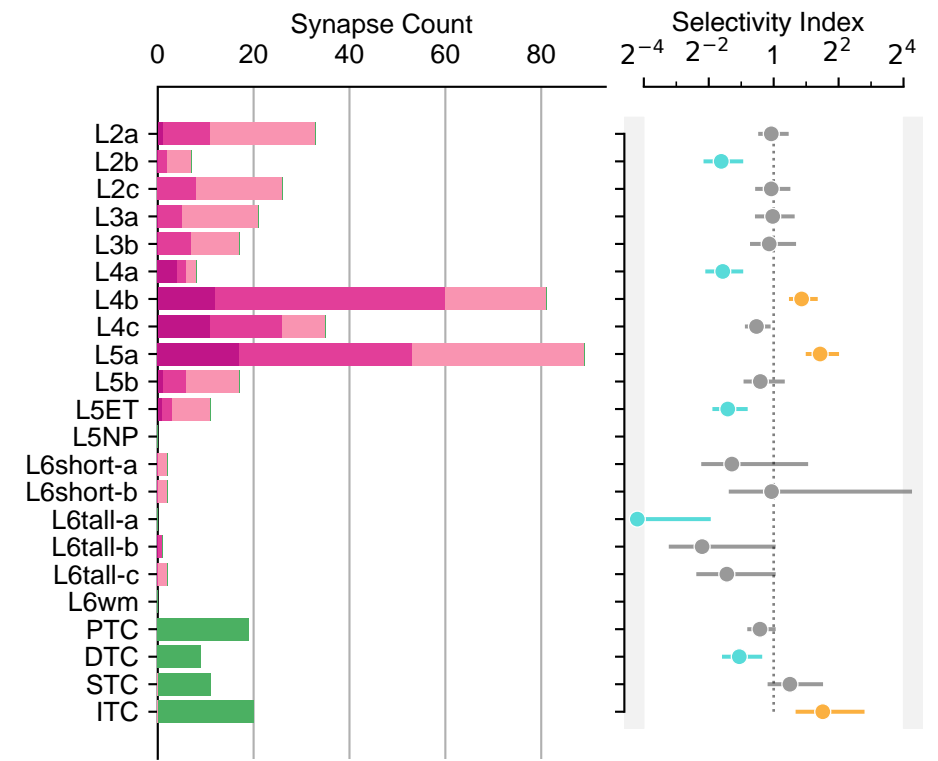

# Motif Group 9

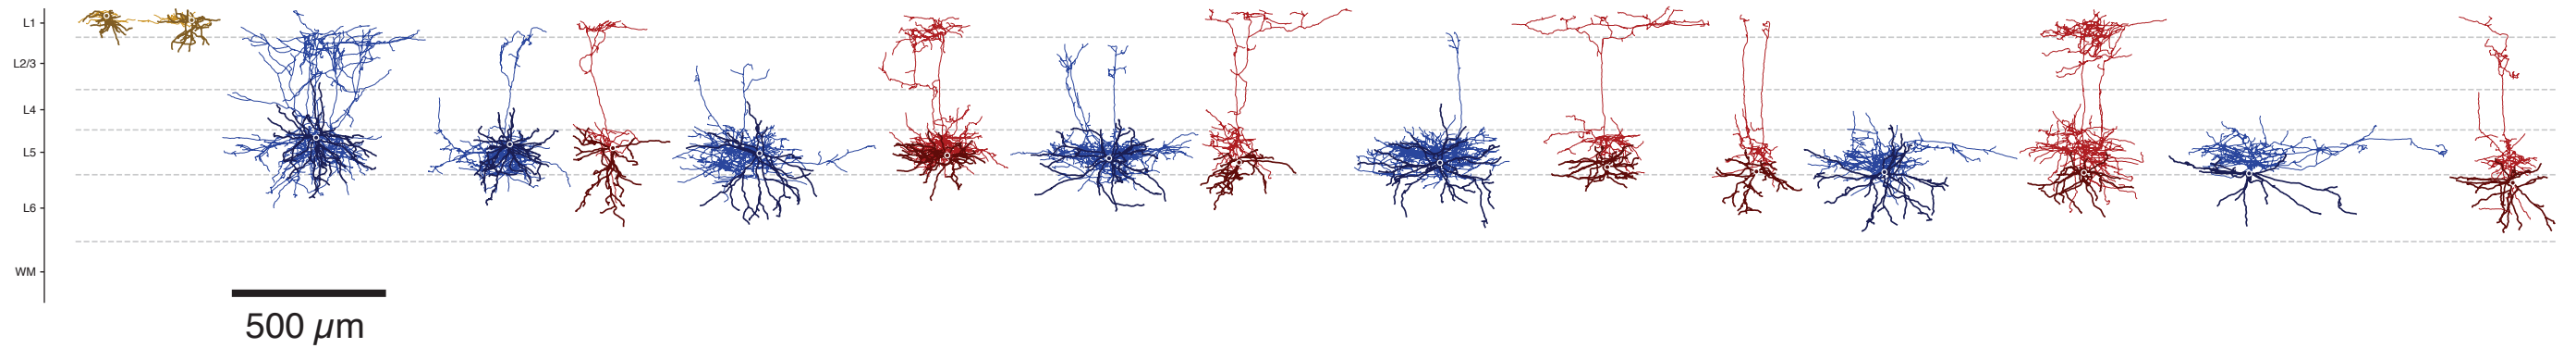

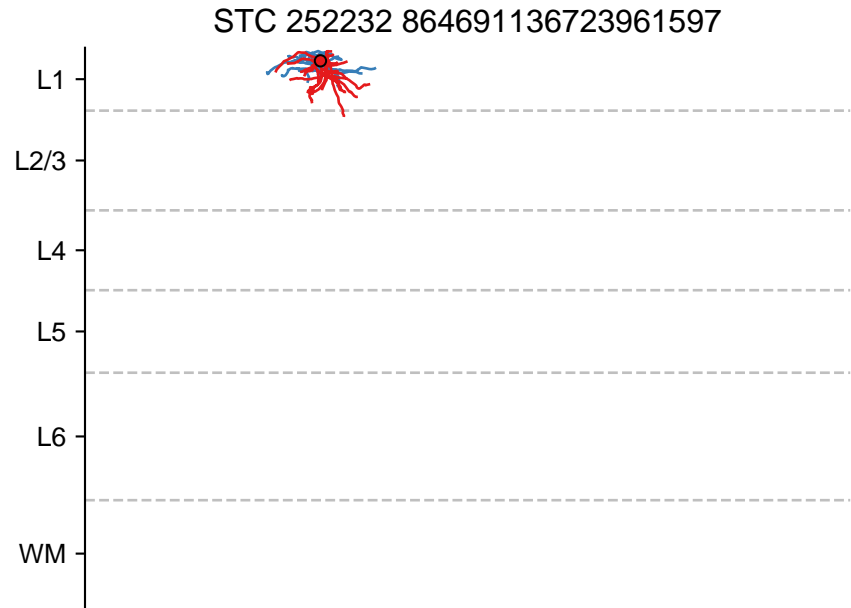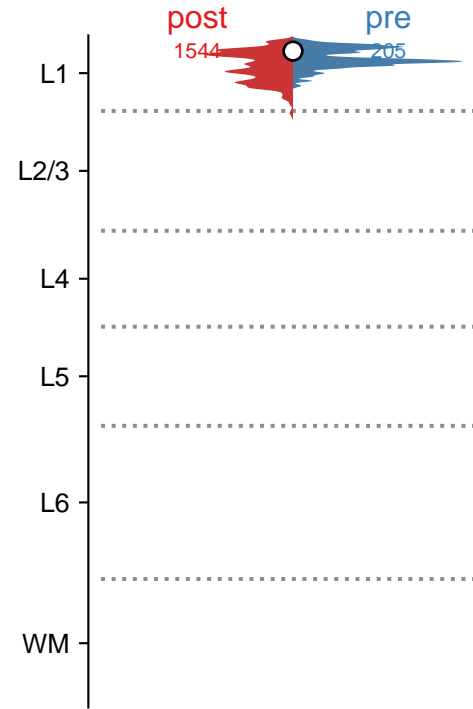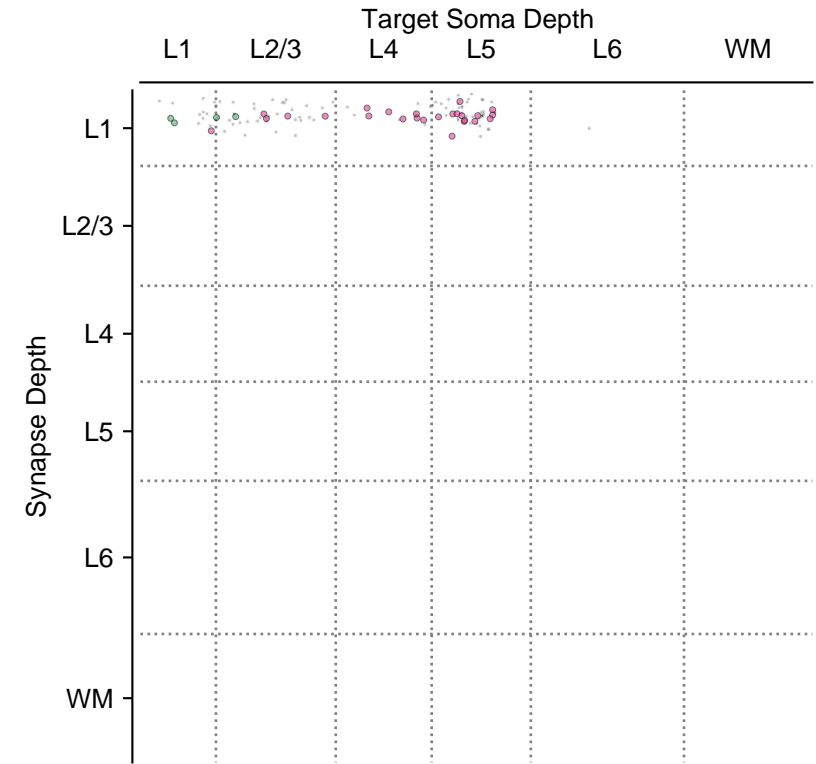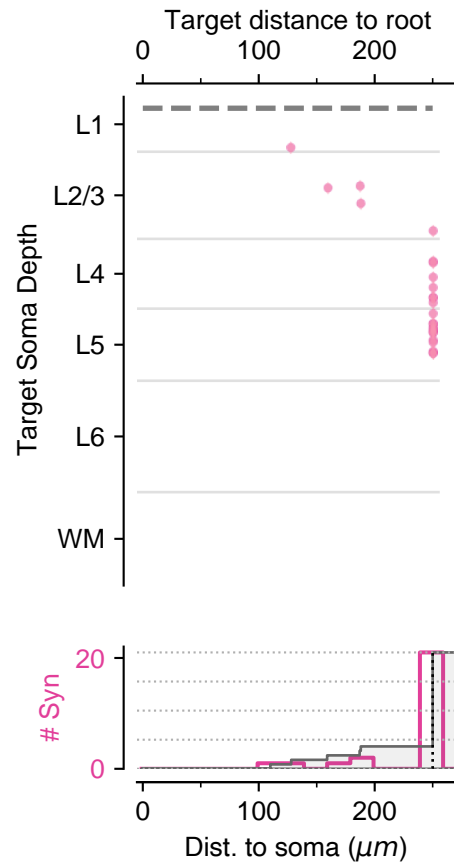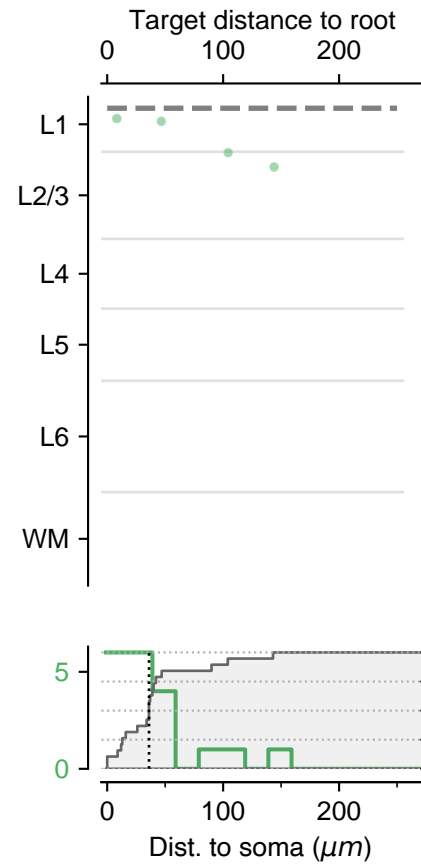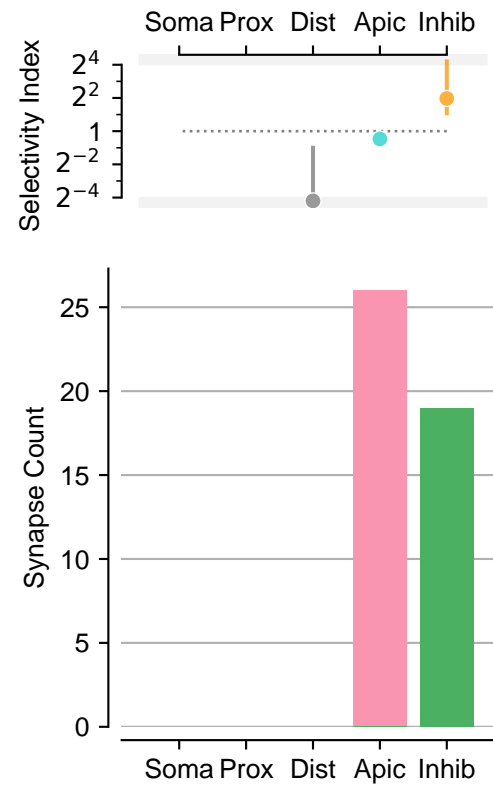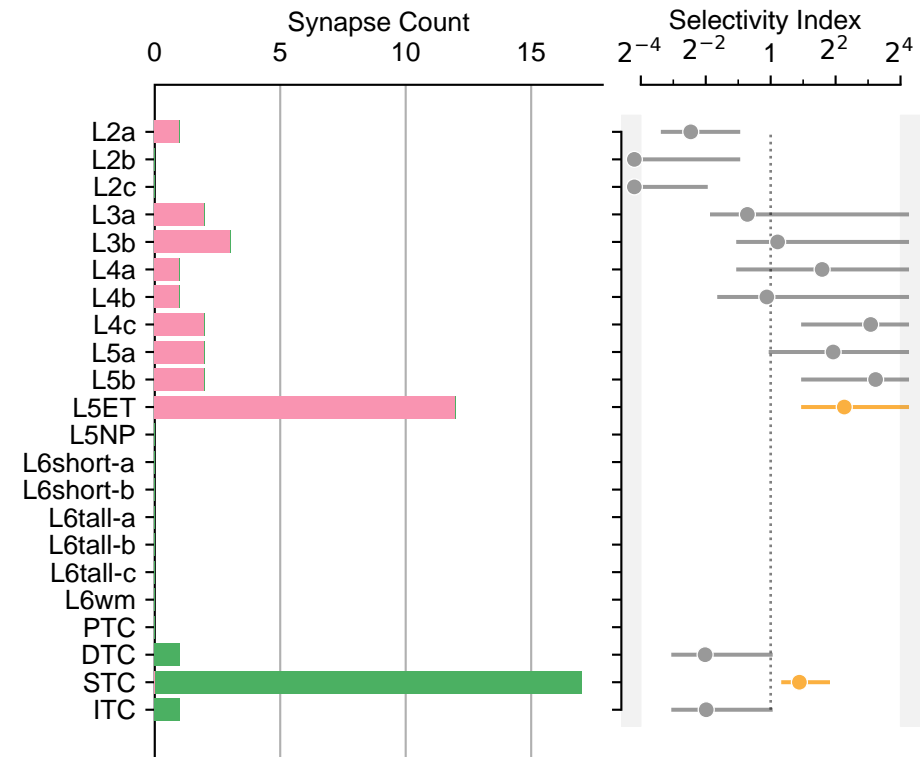

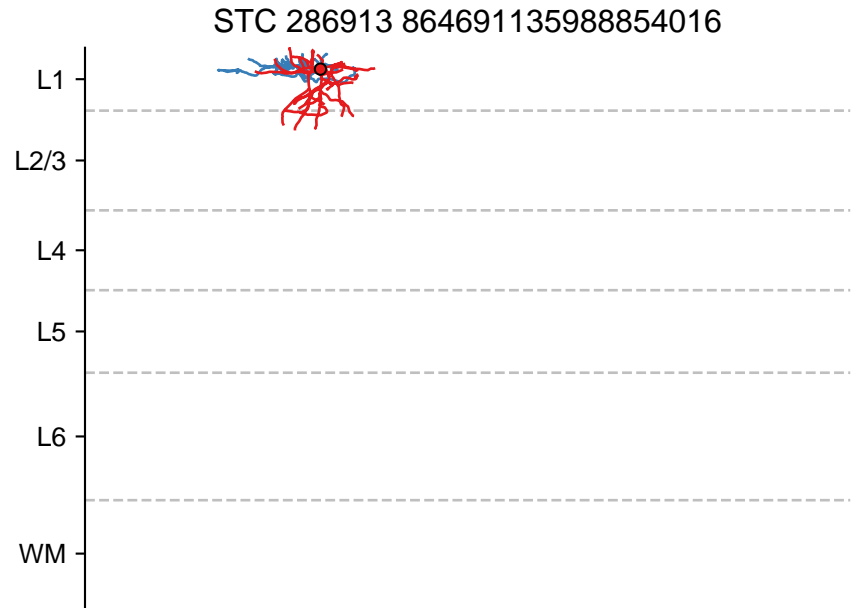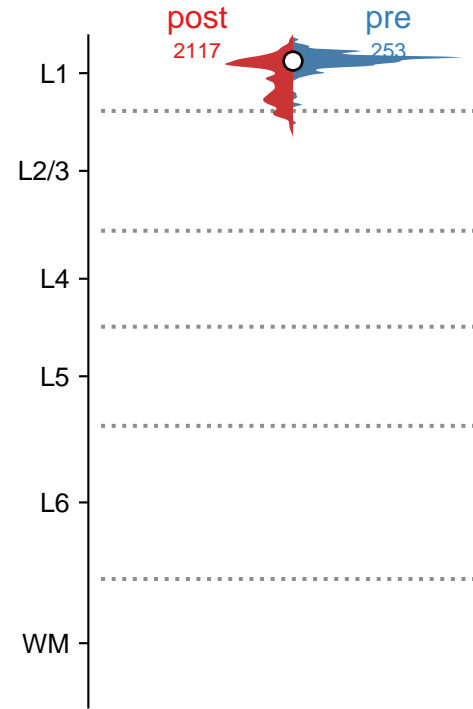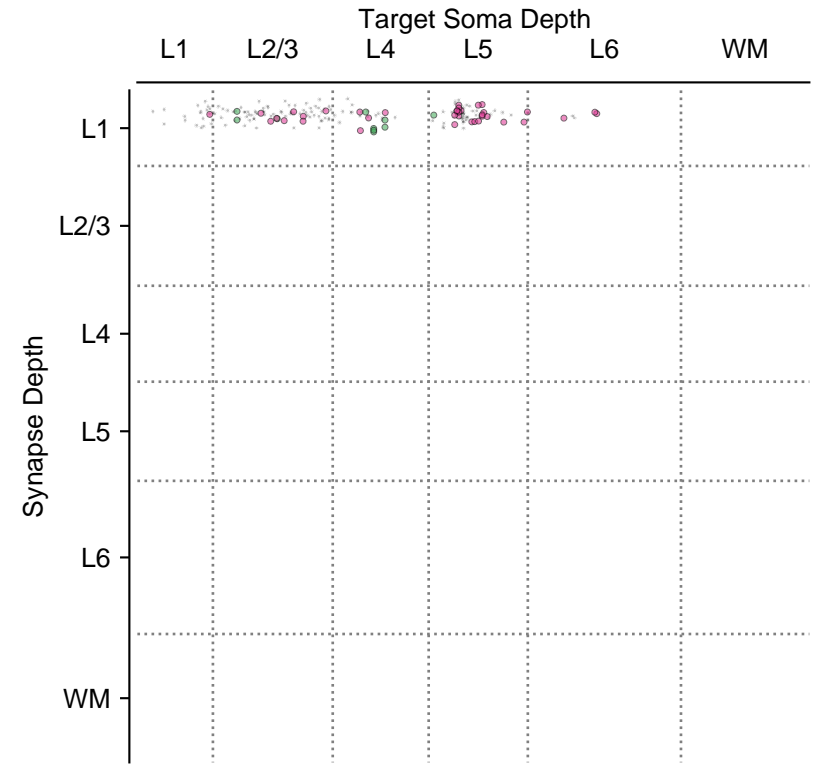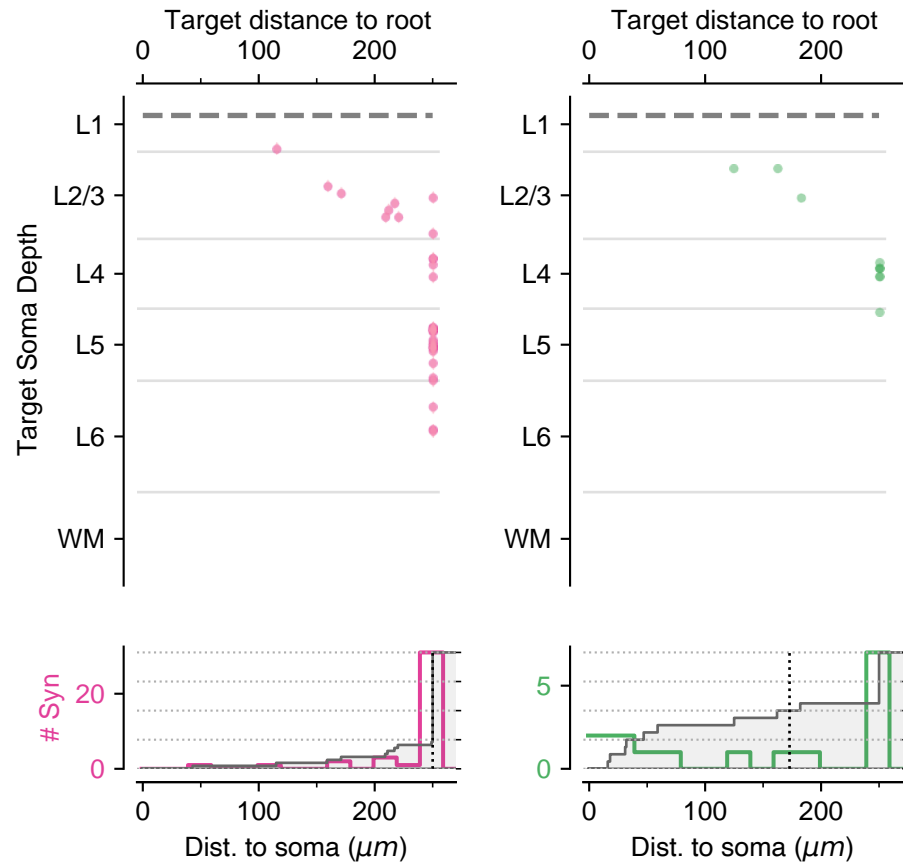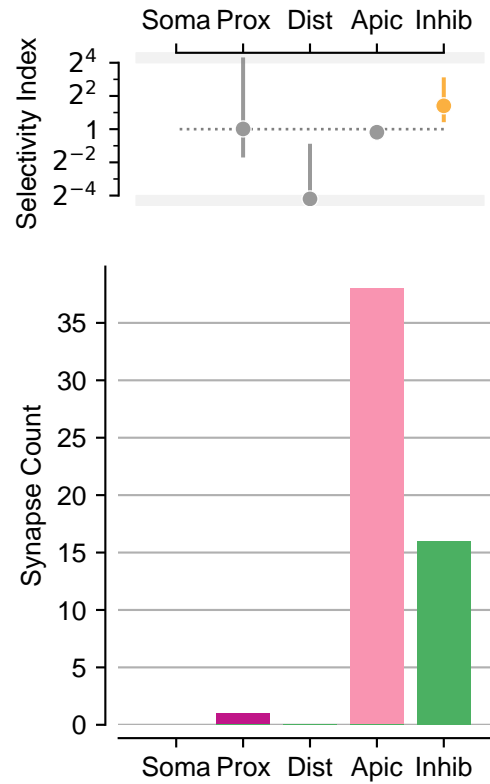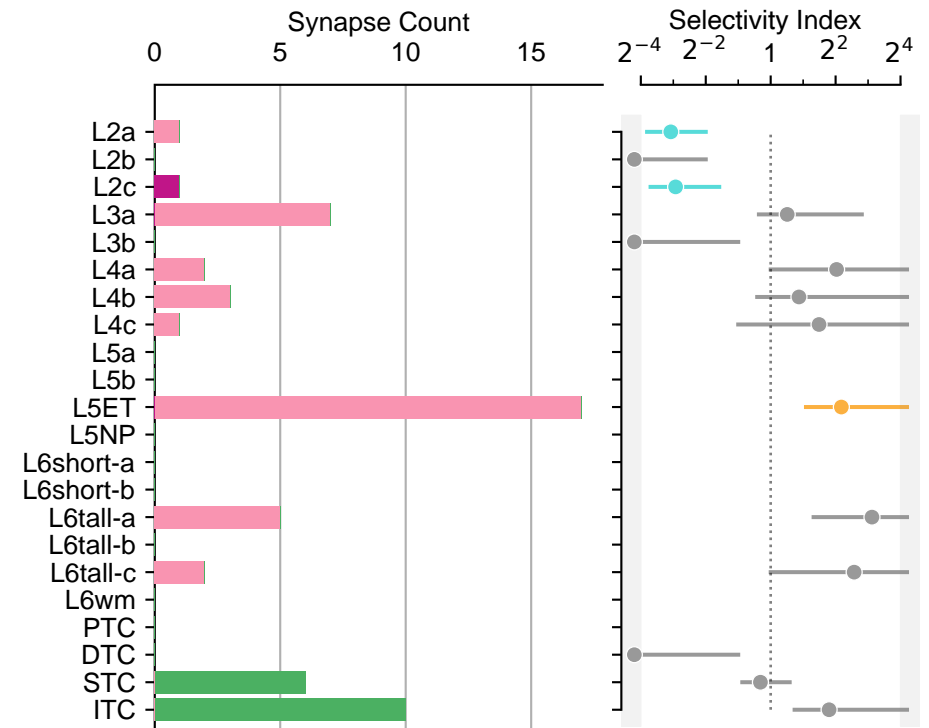

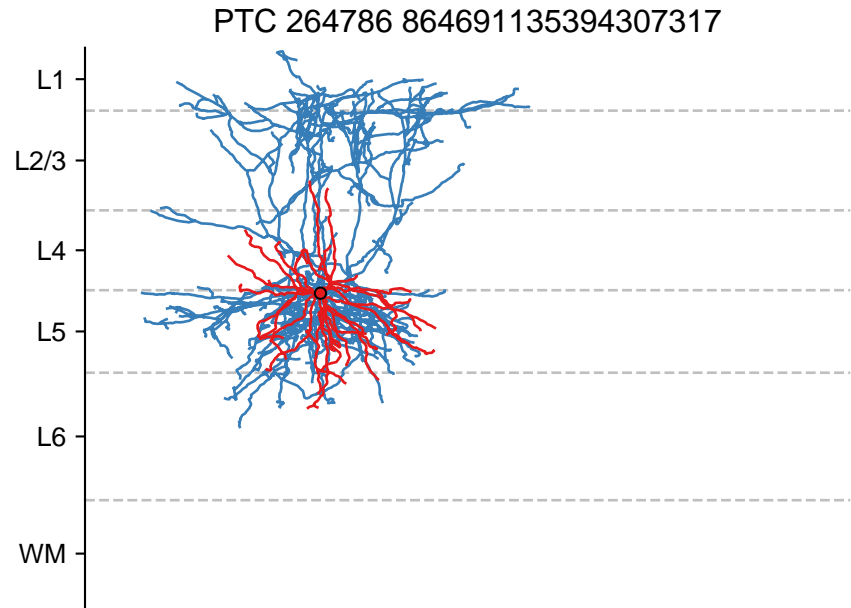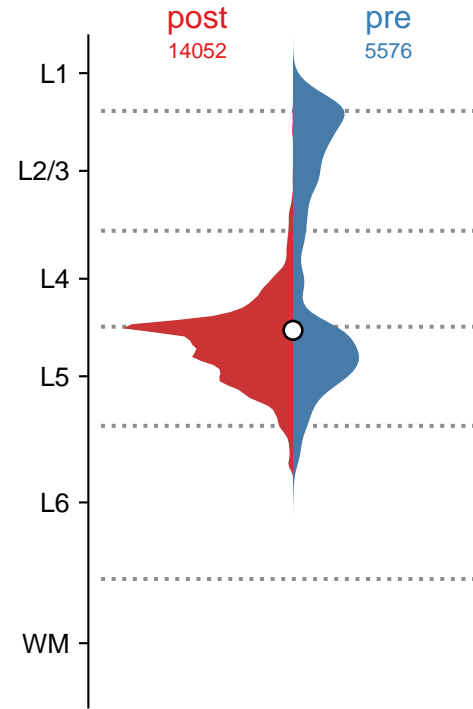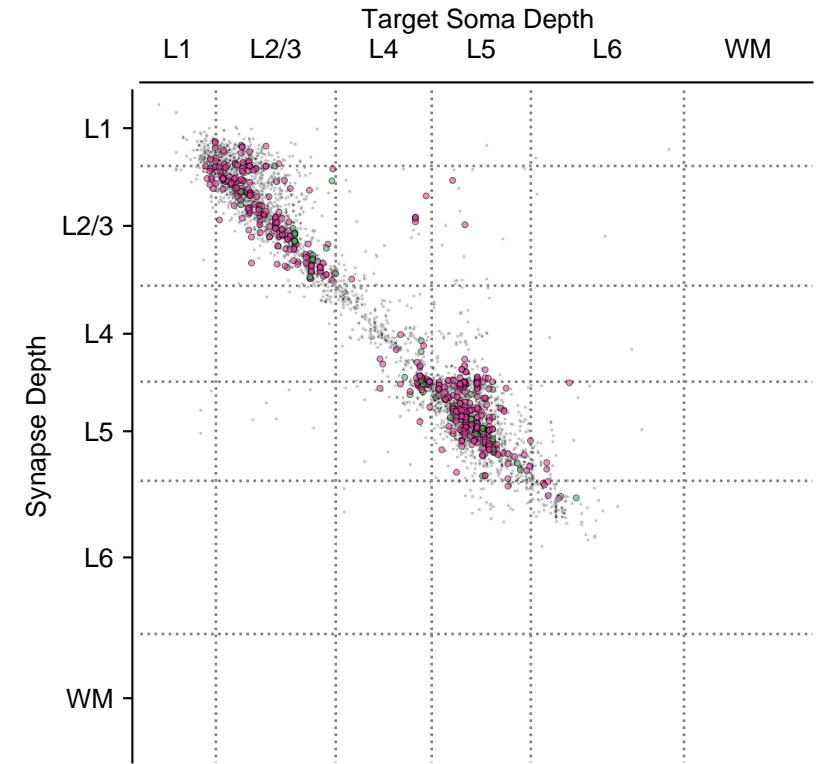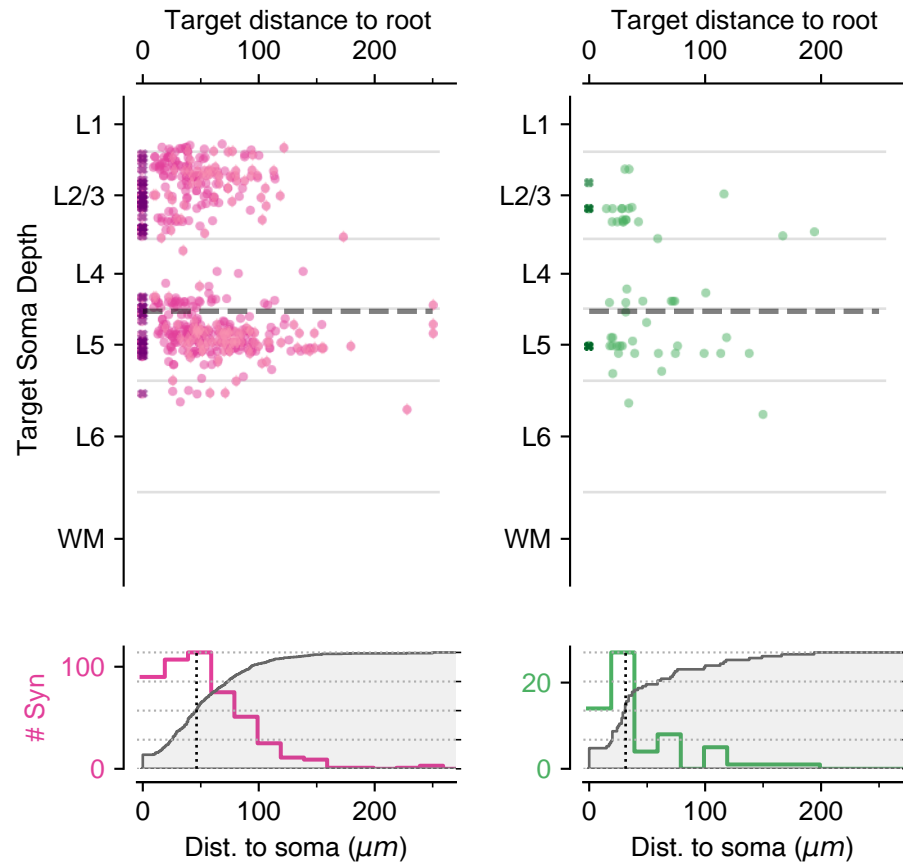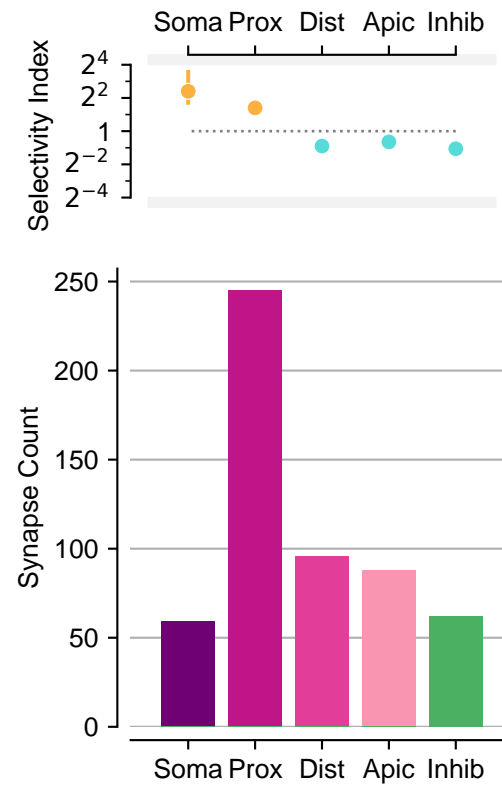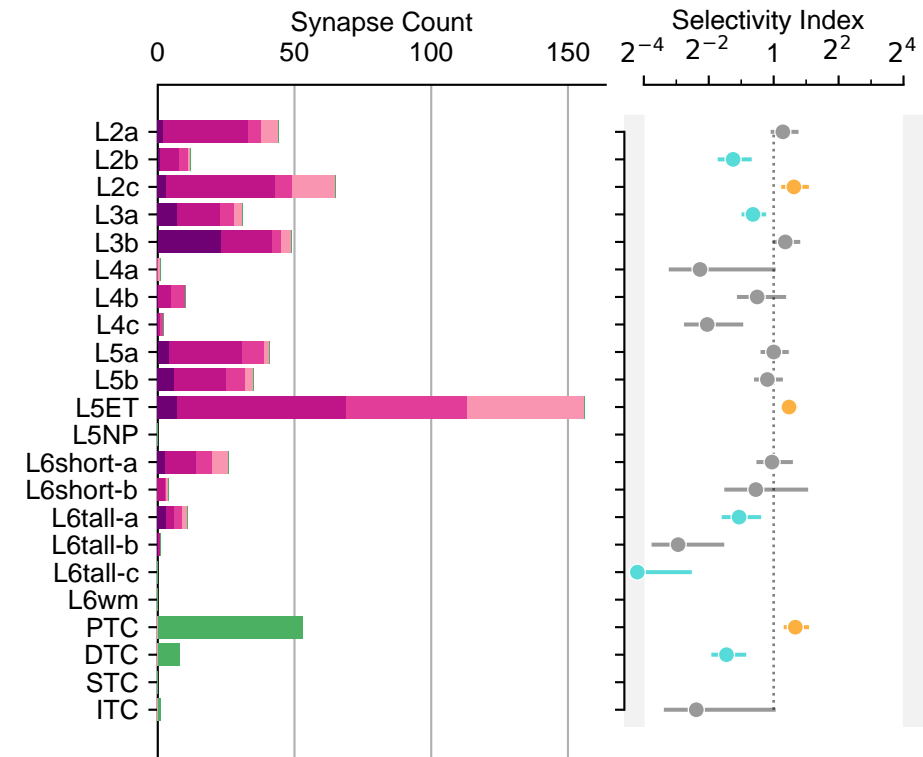

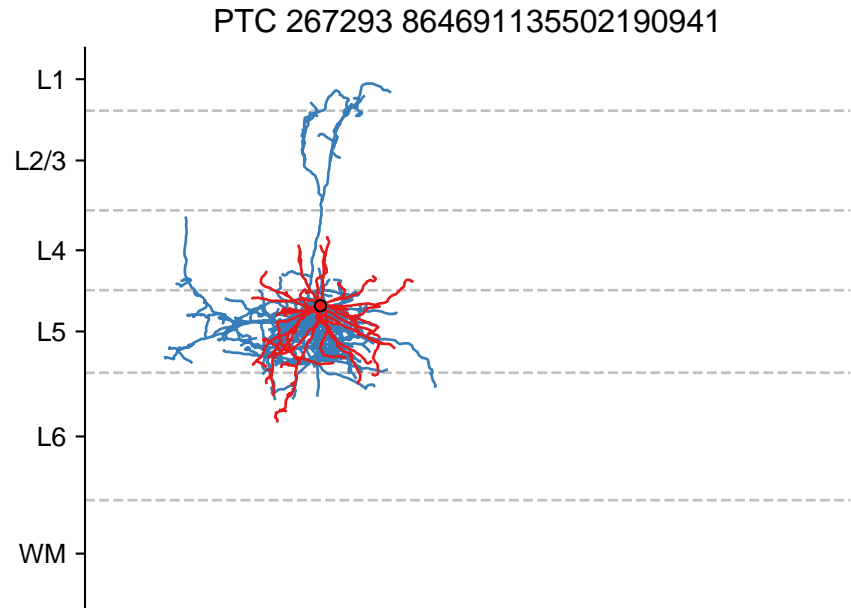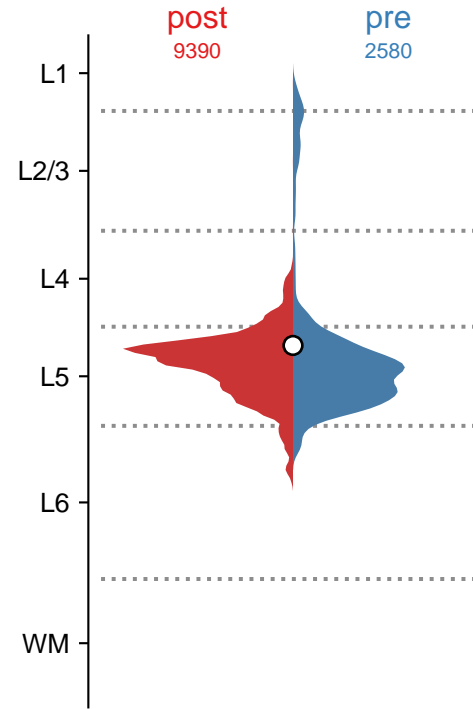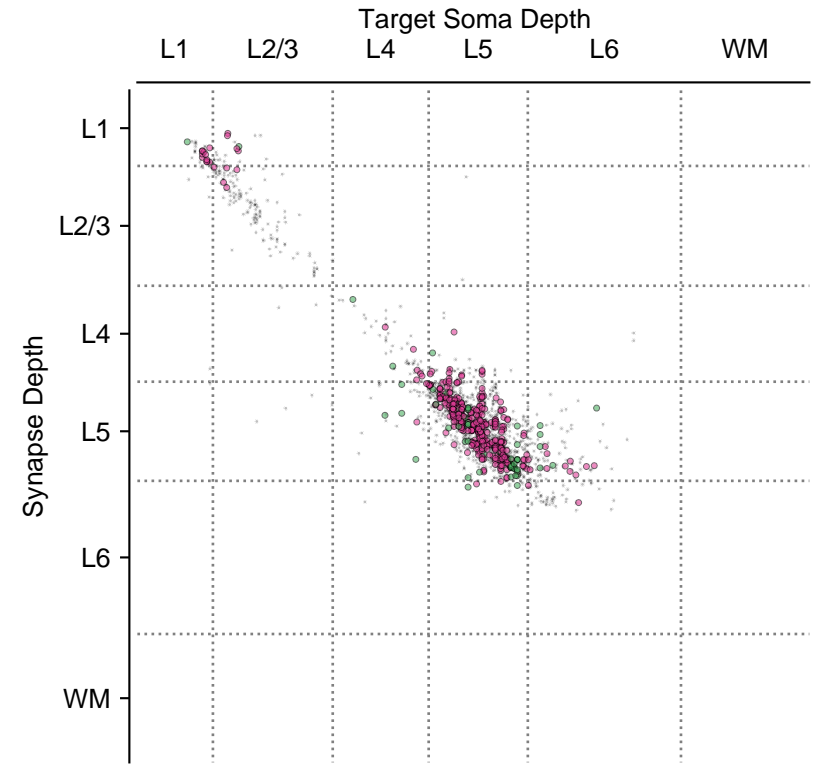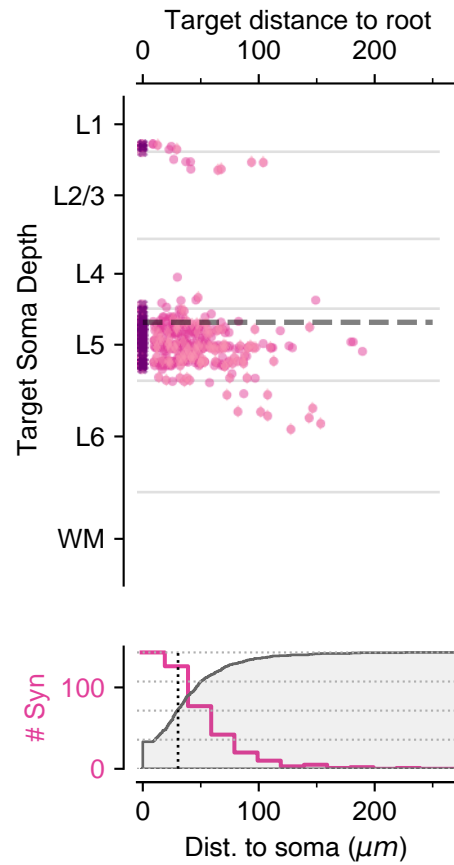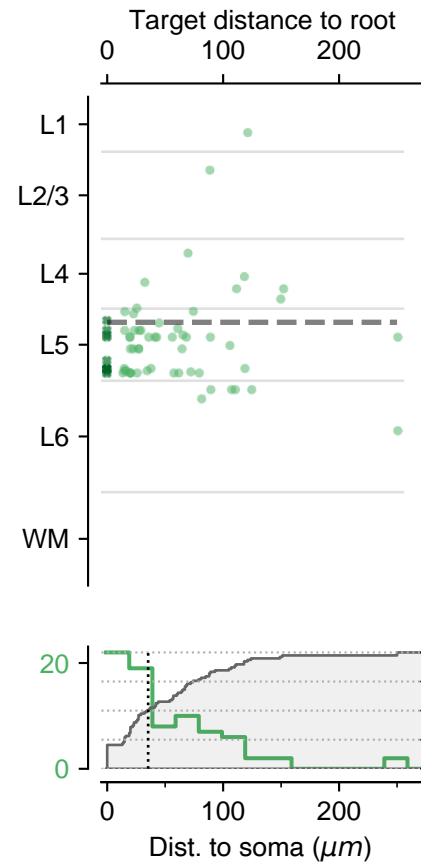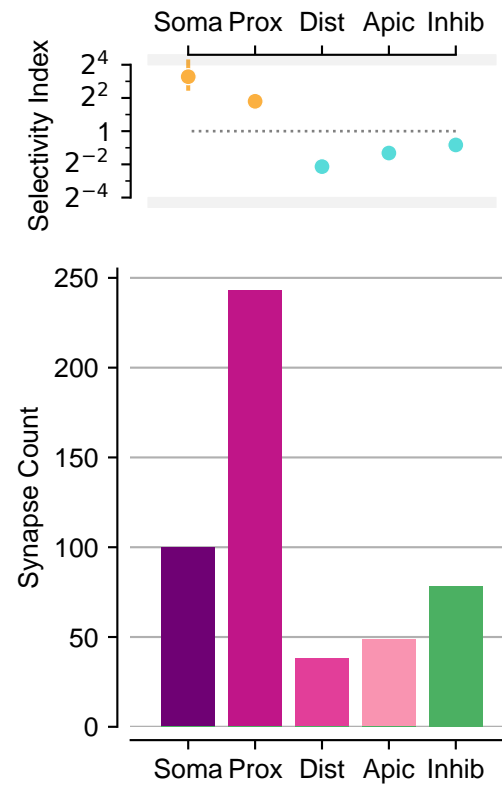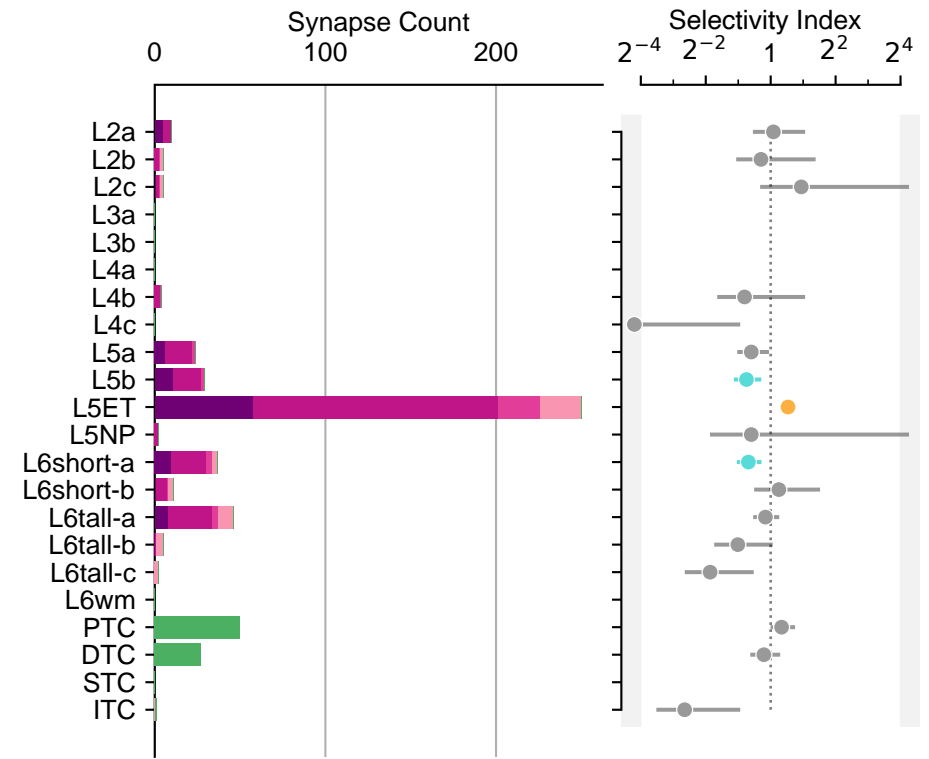

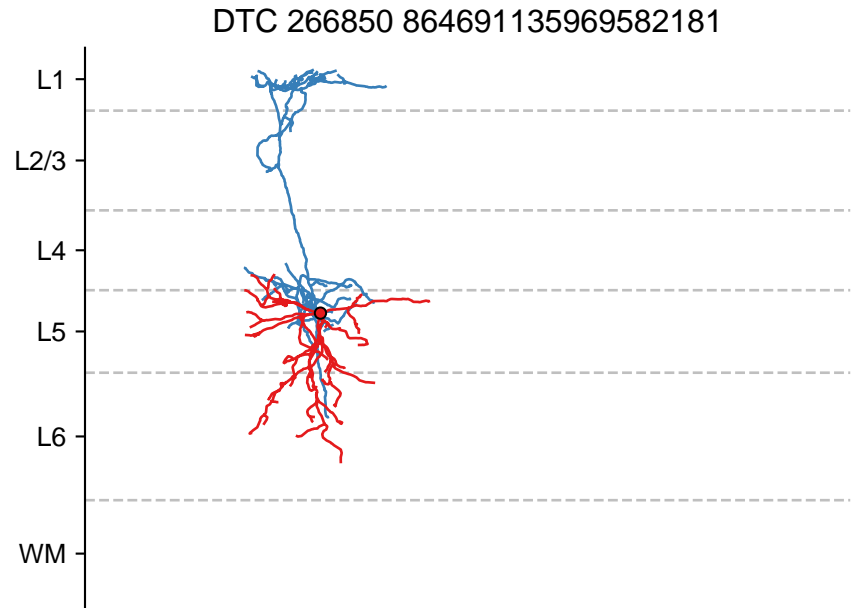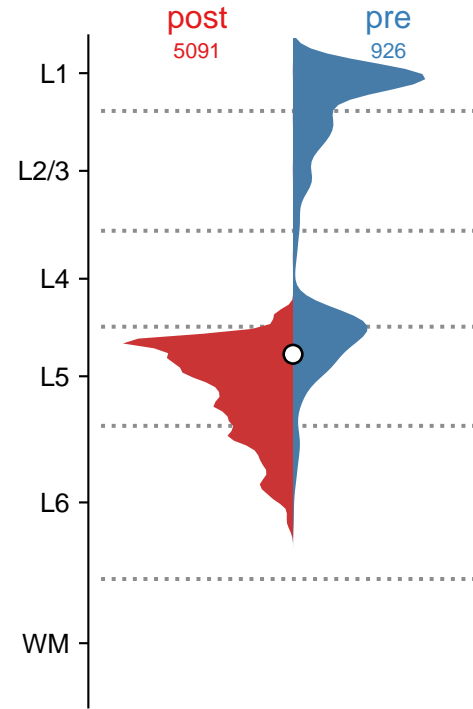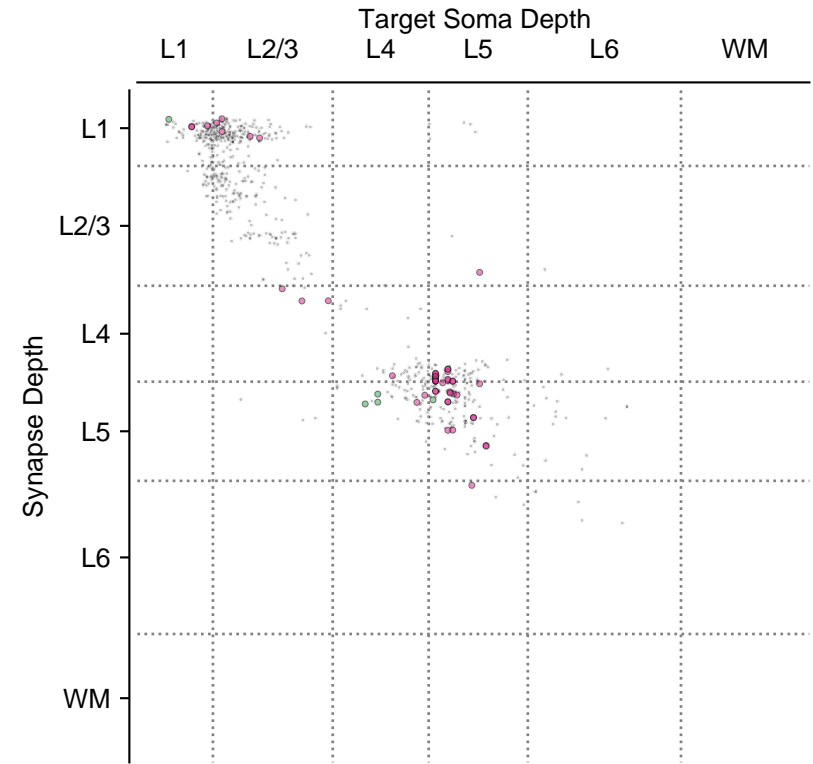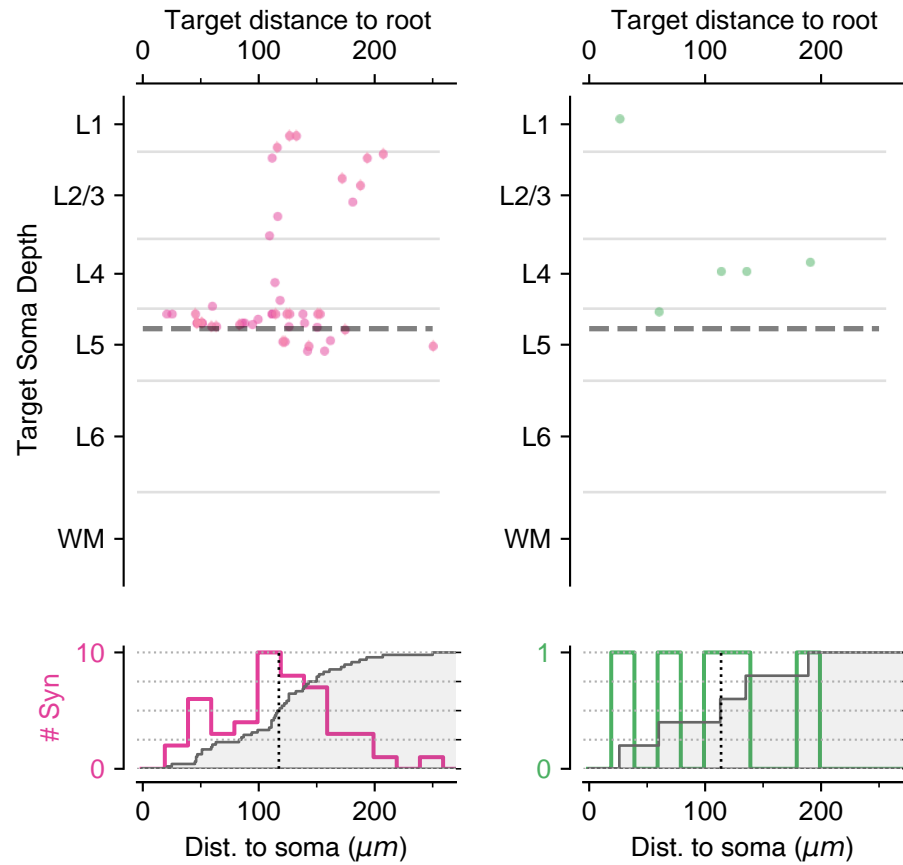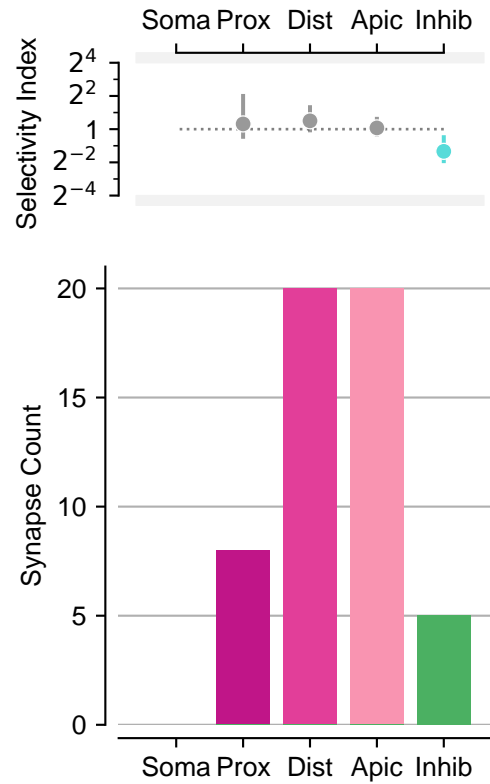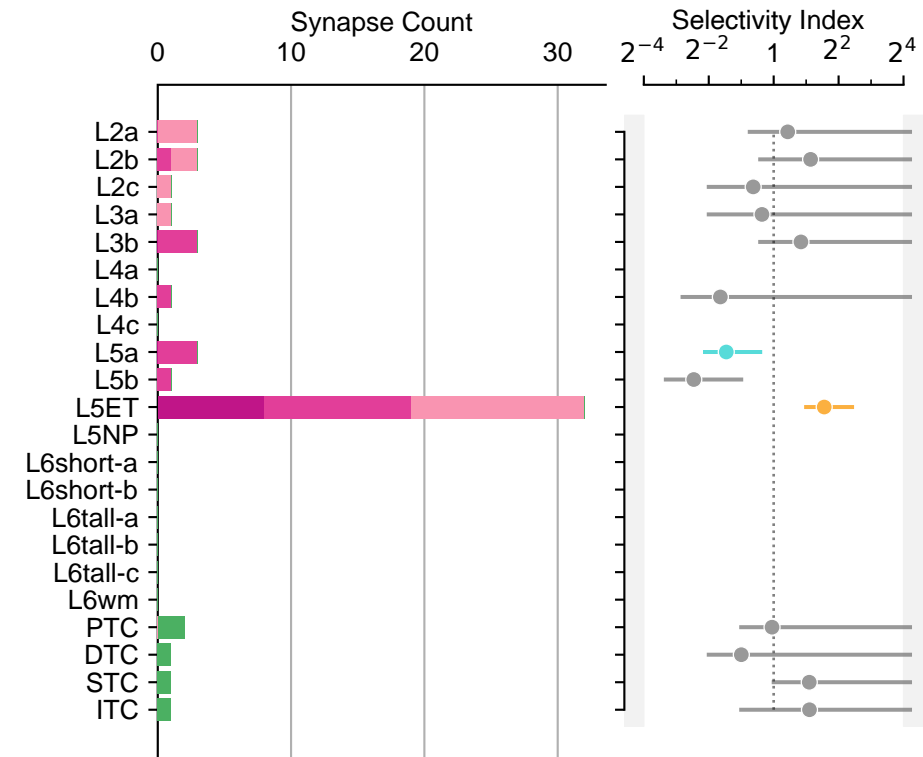

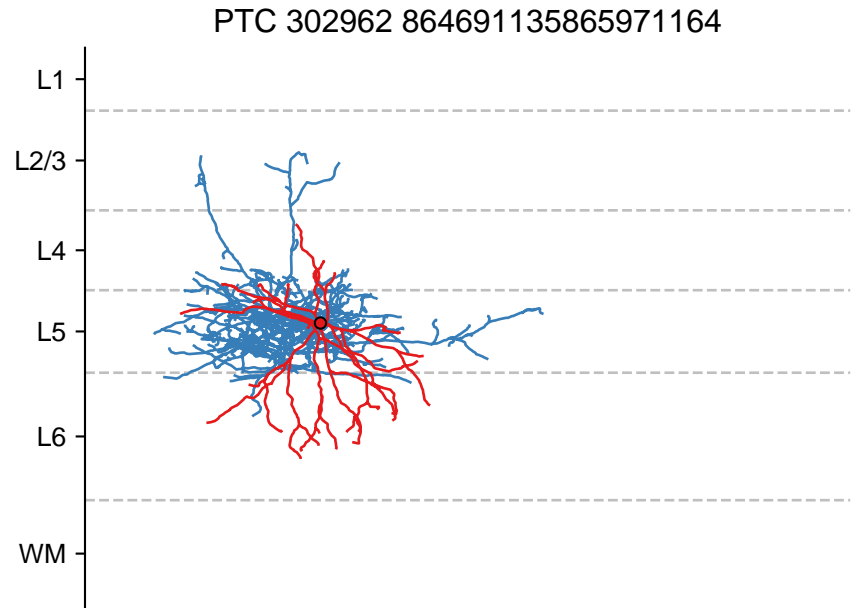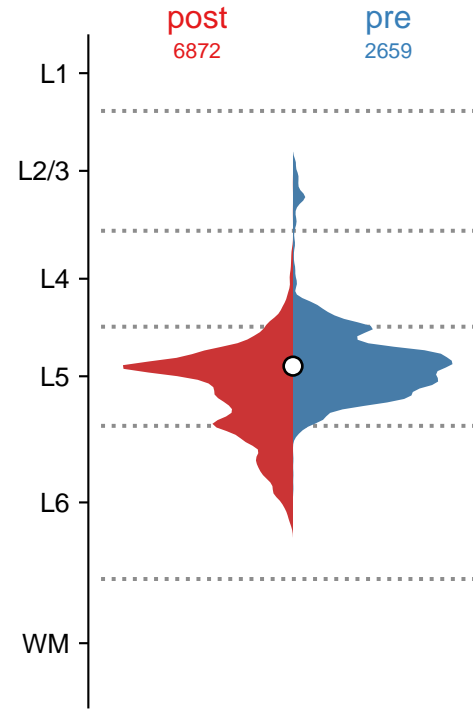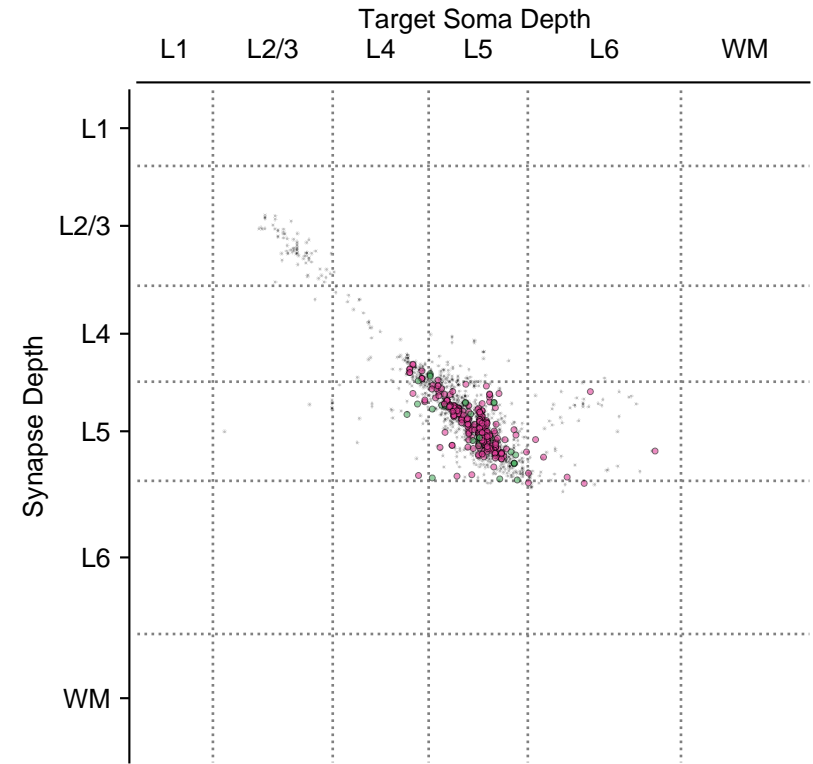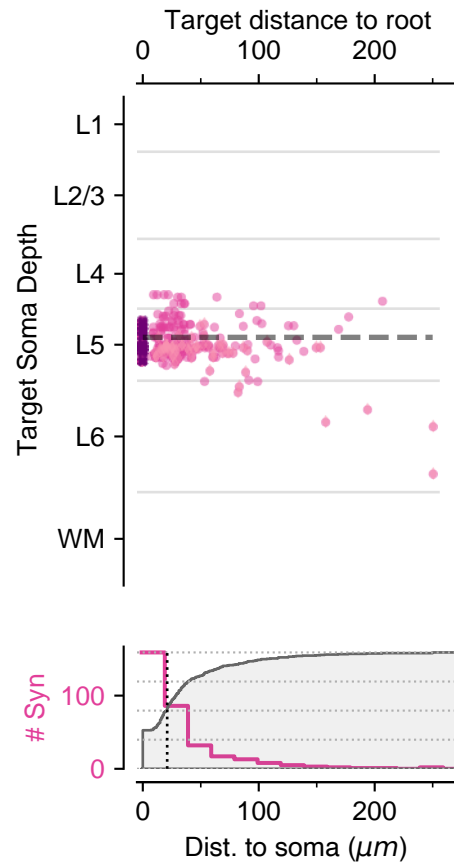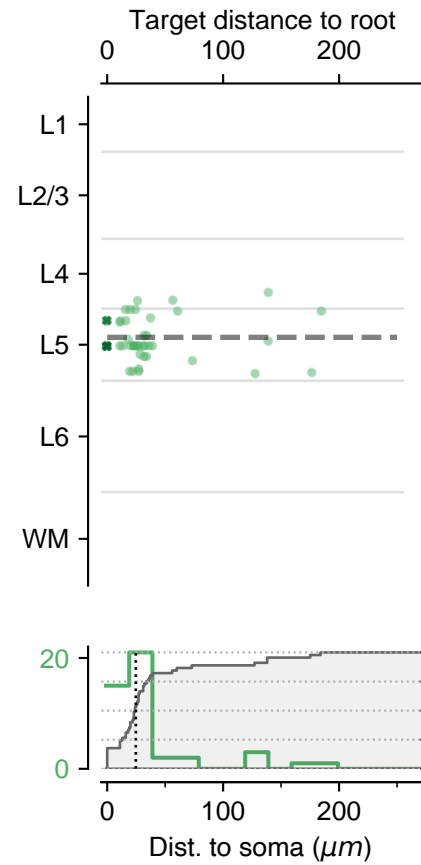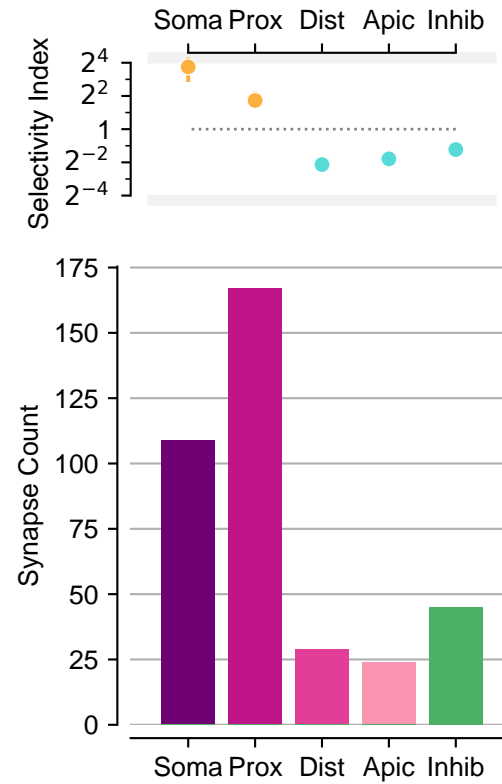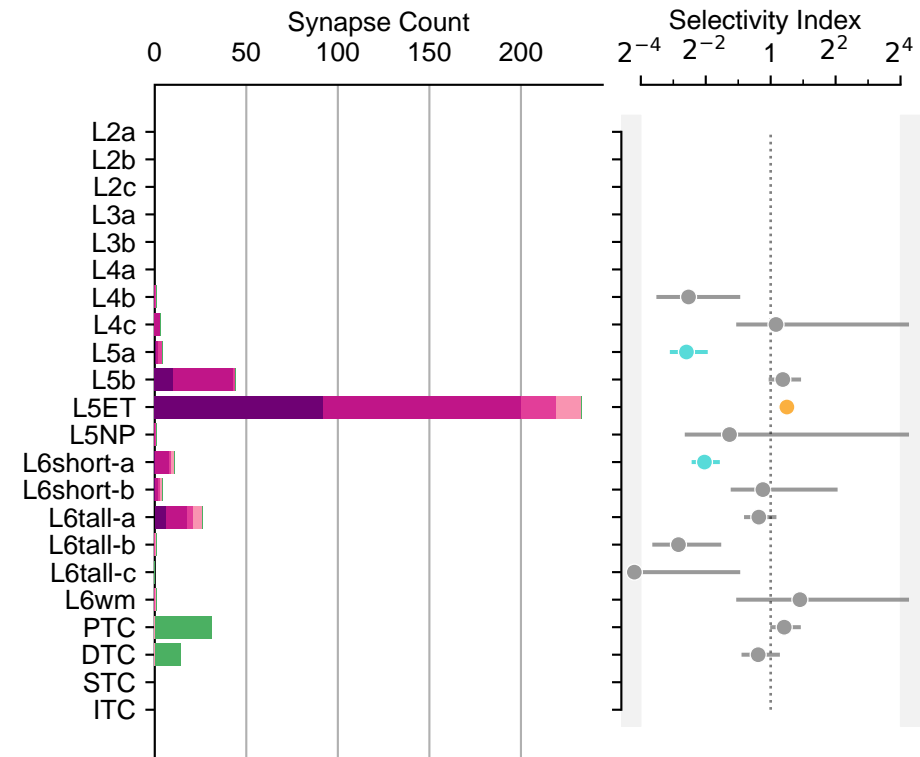



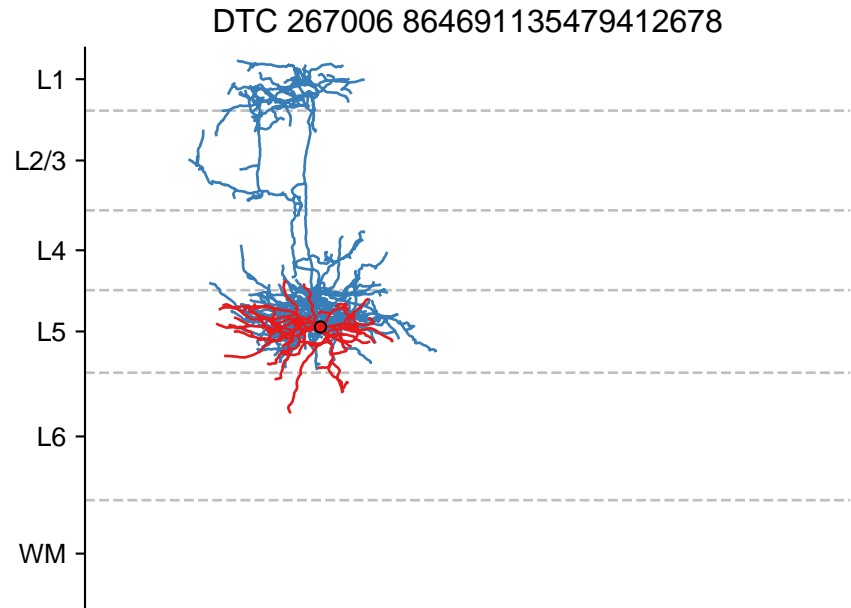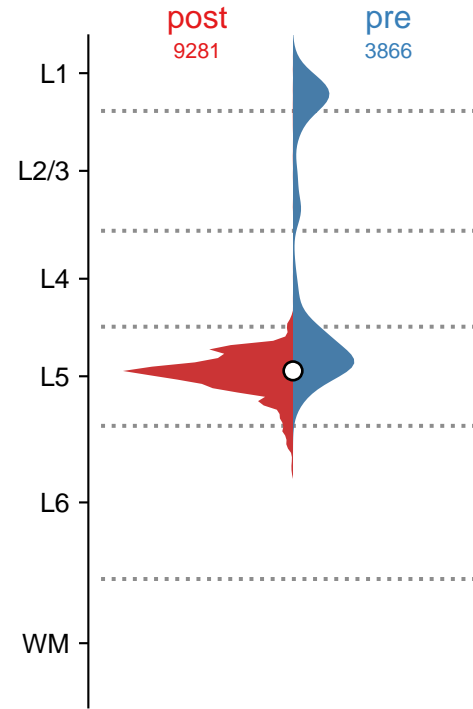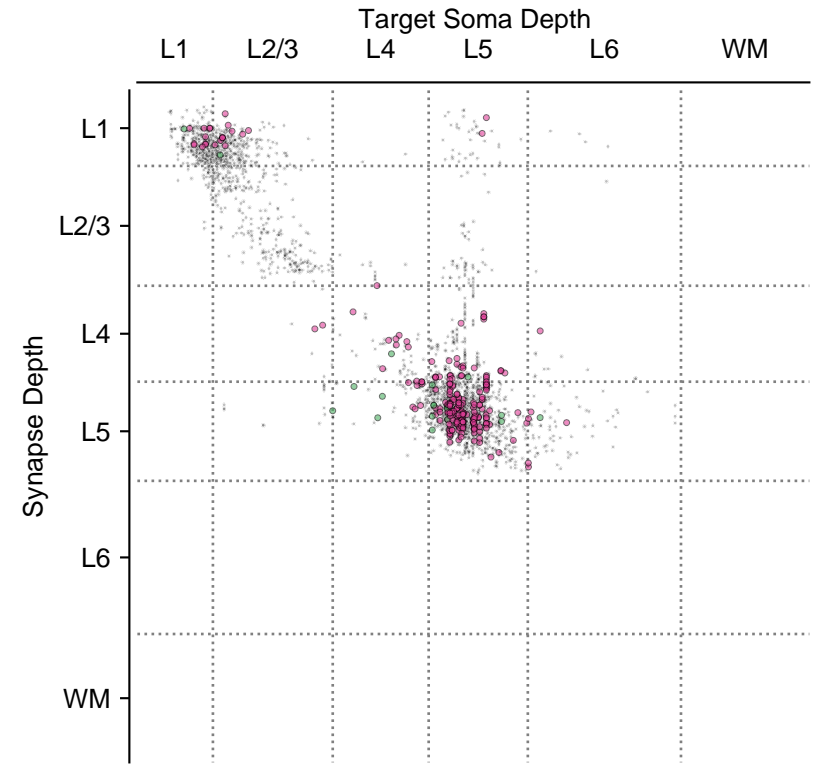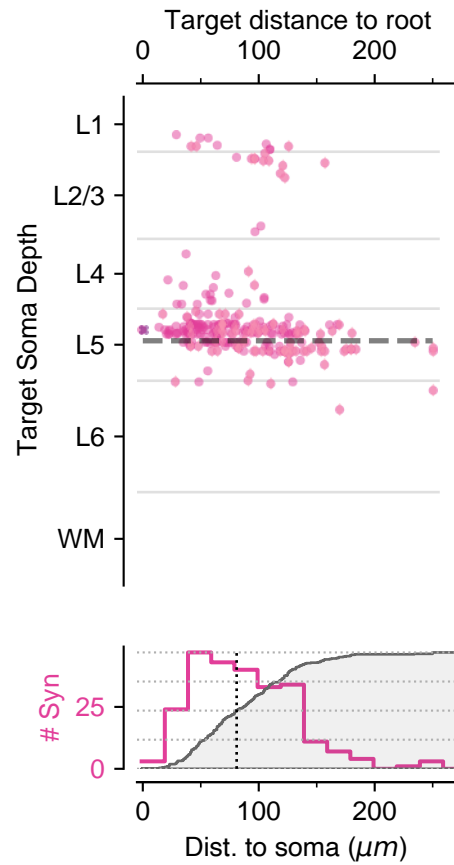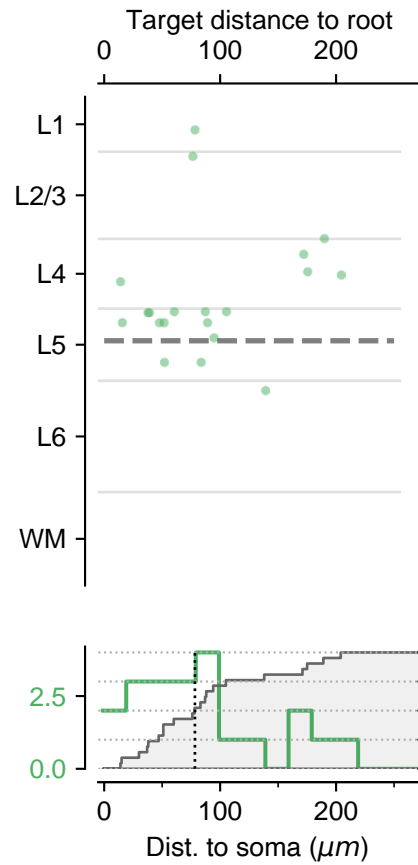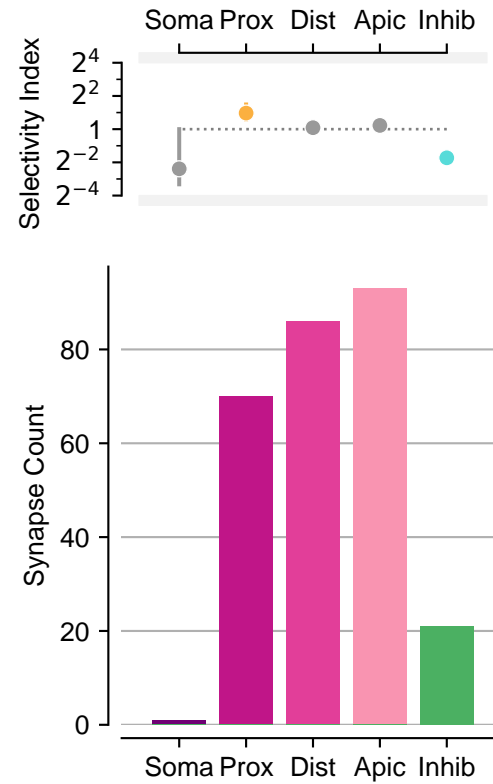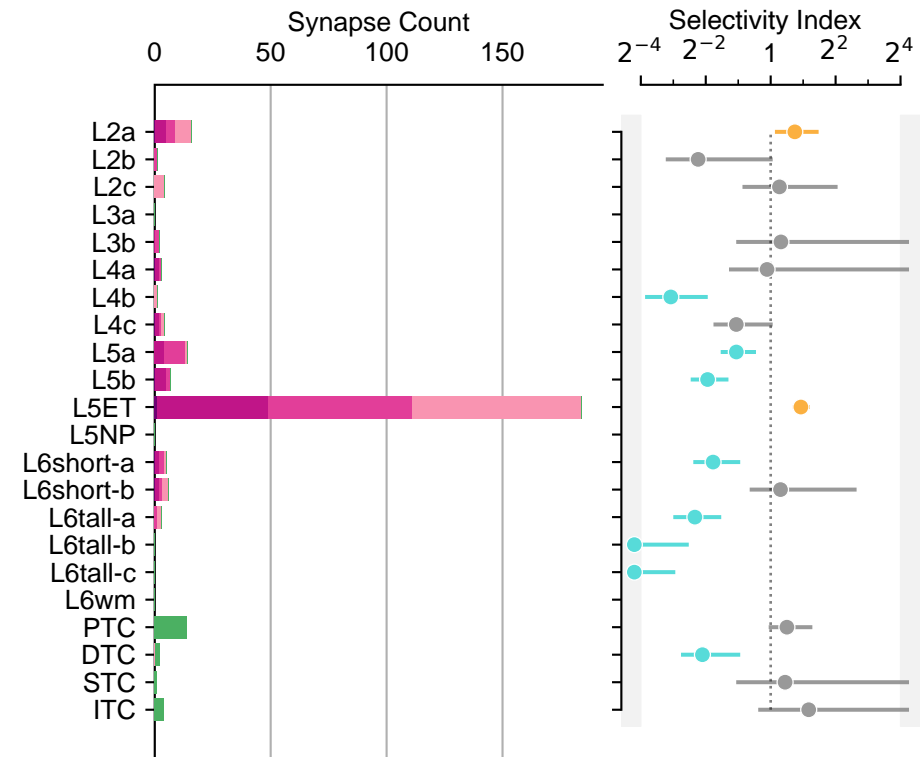

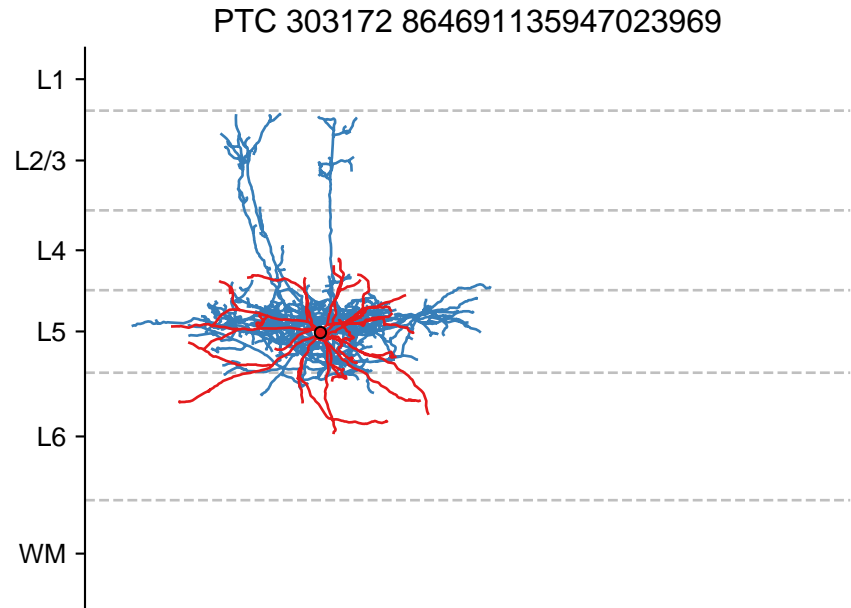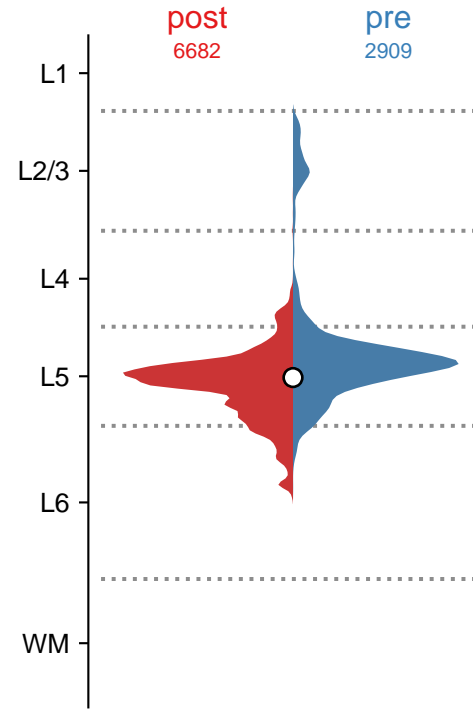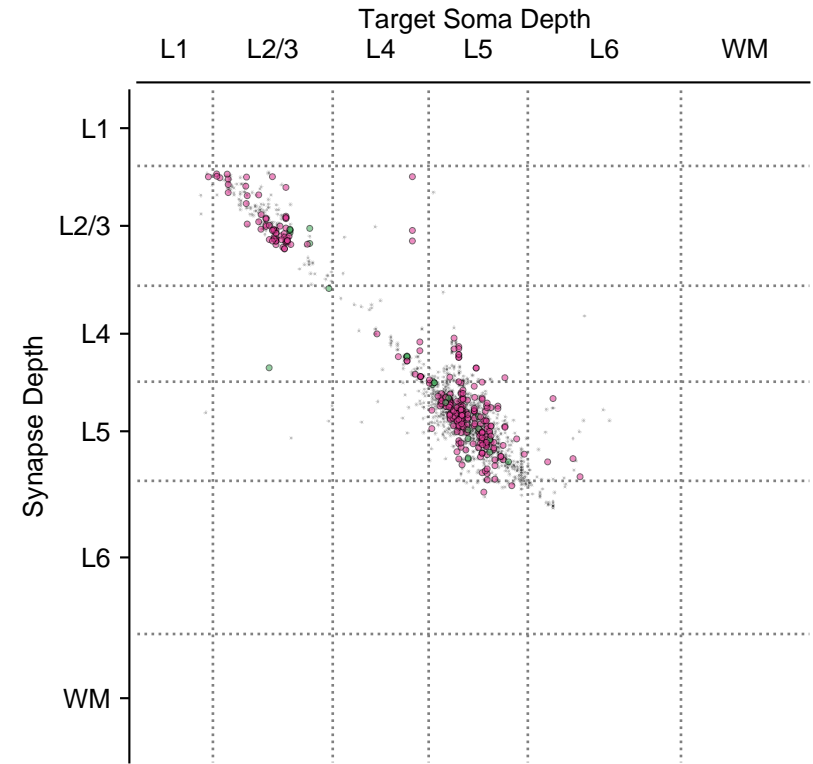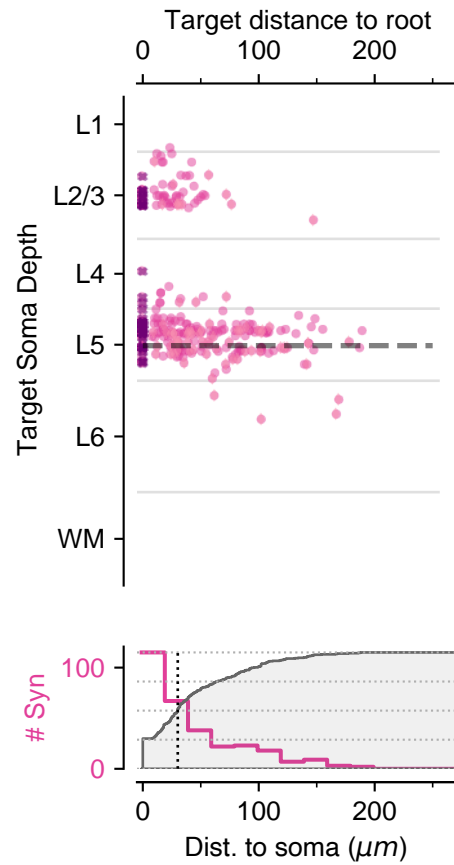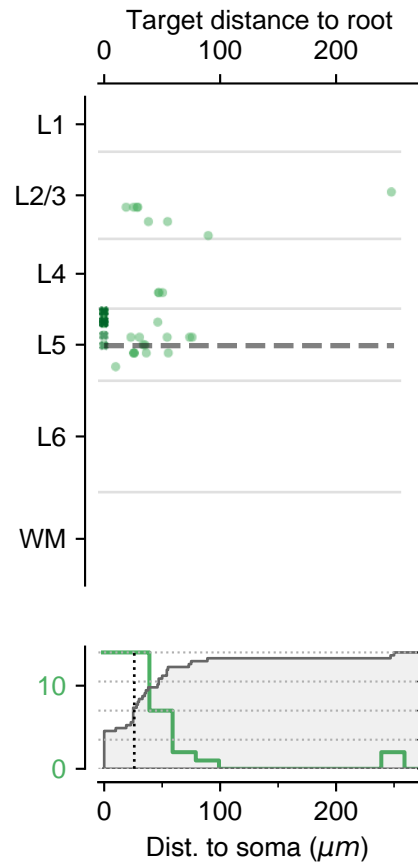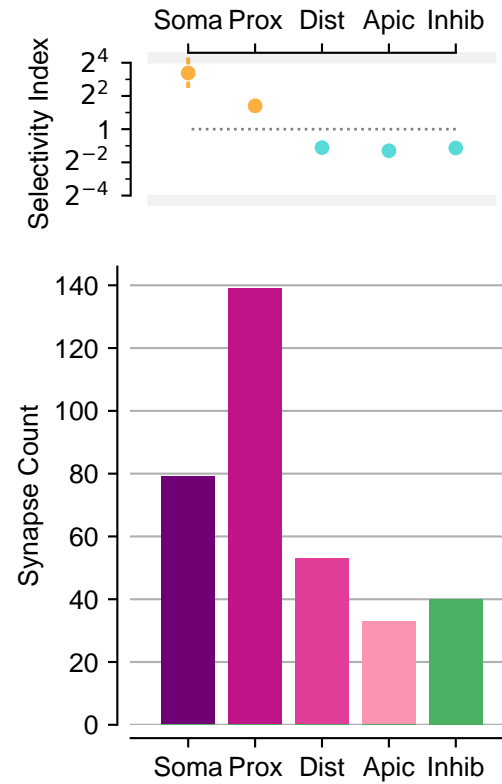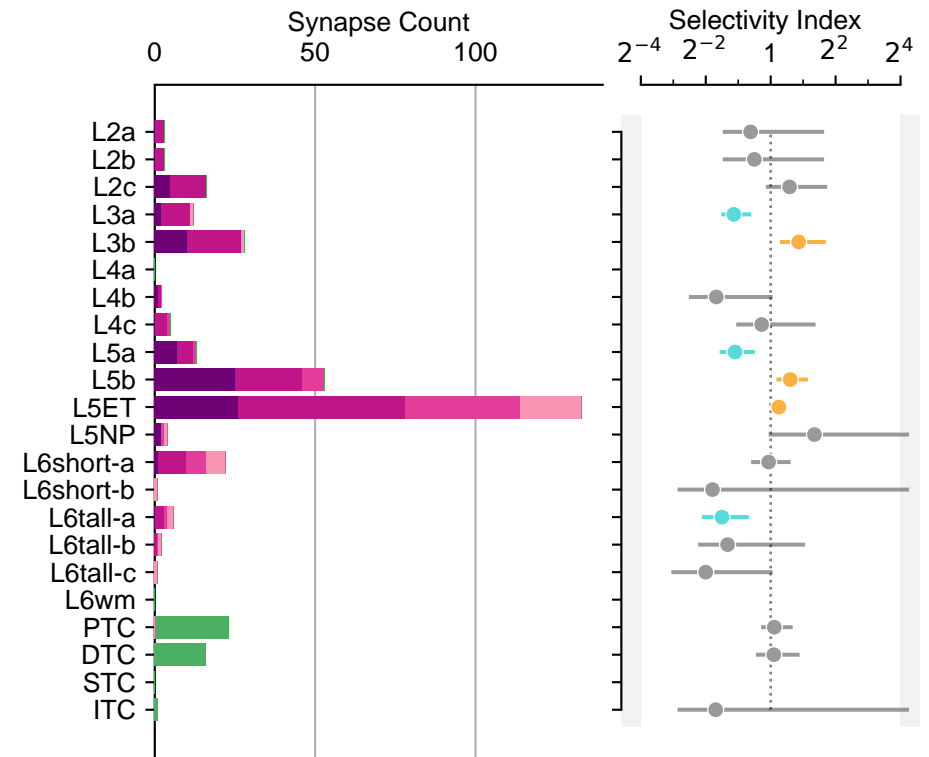

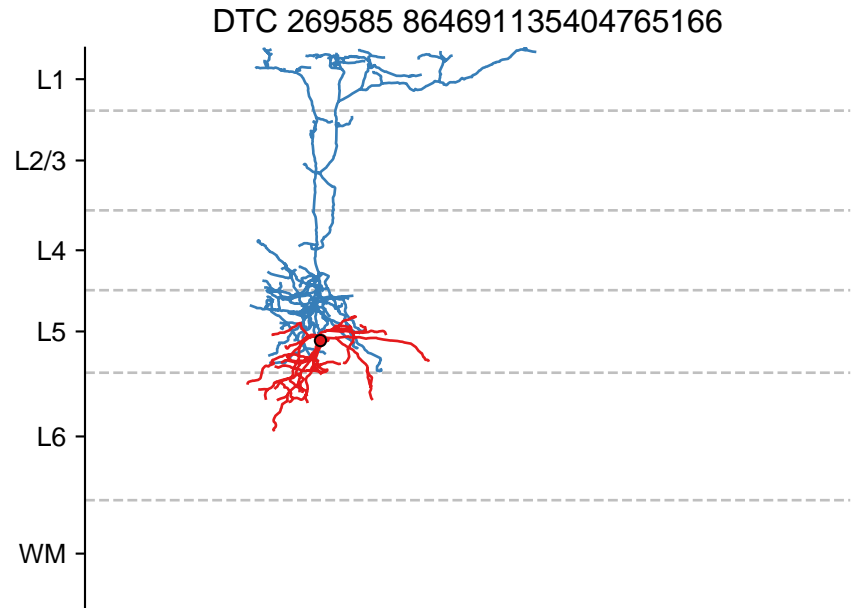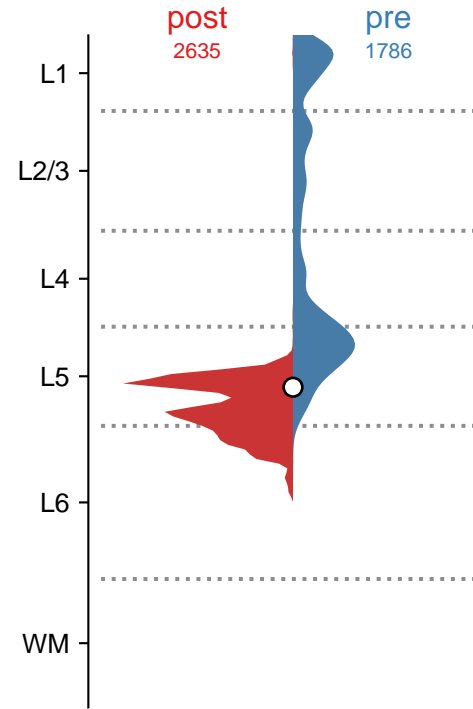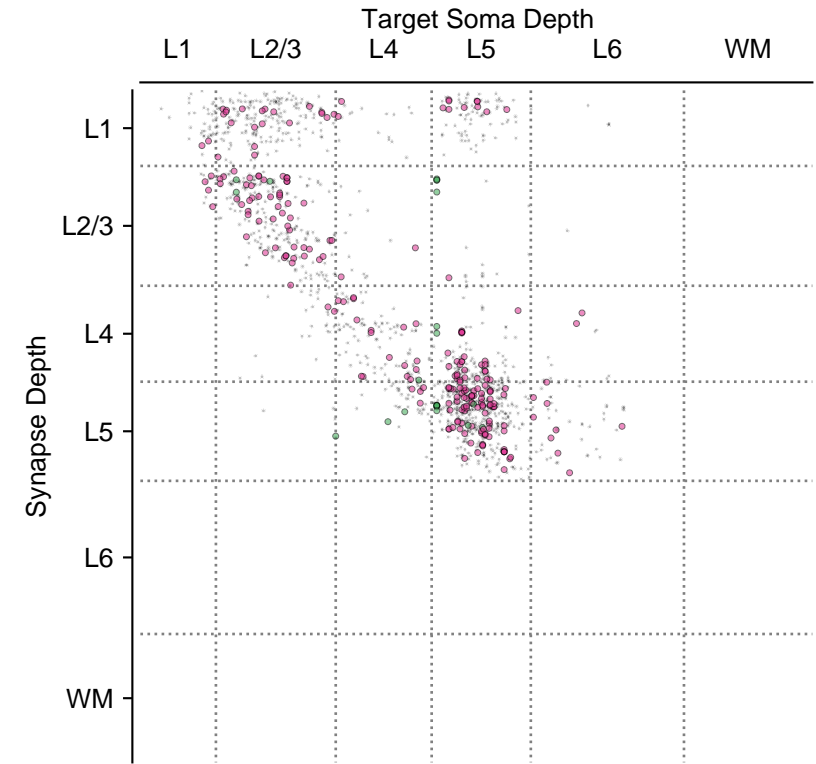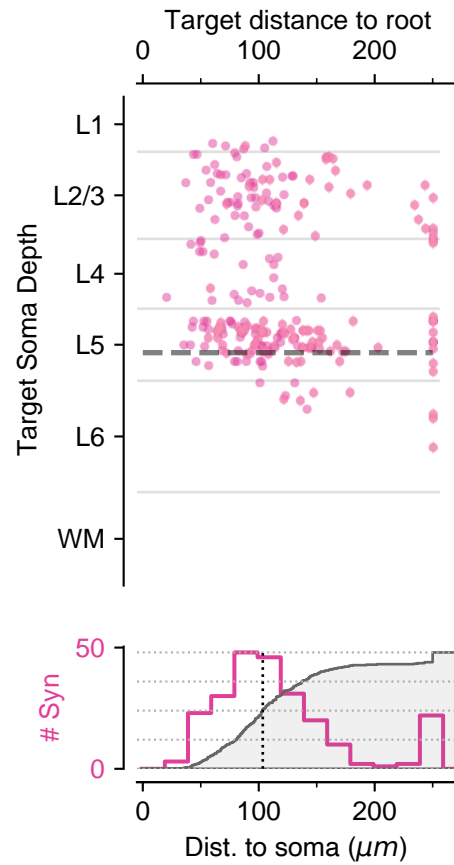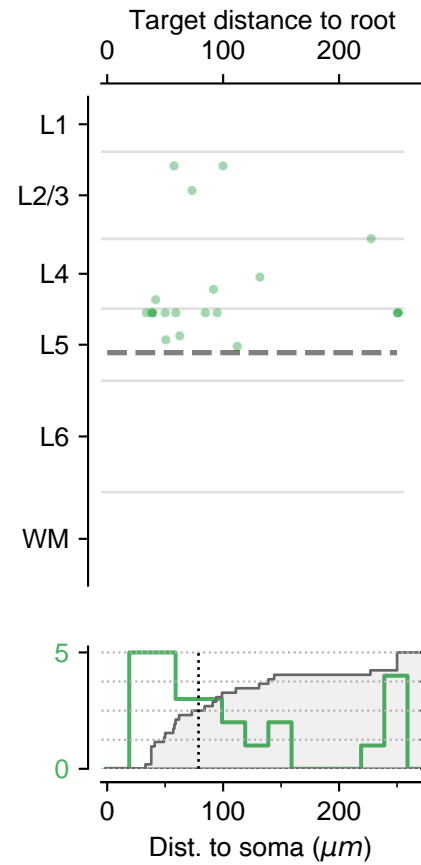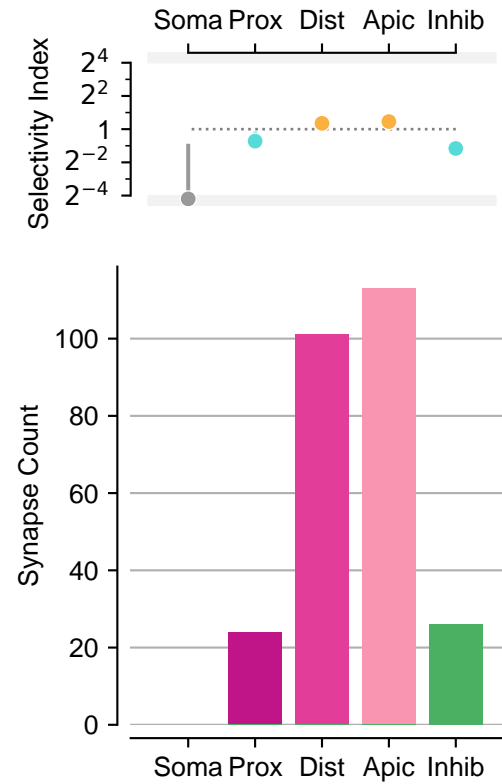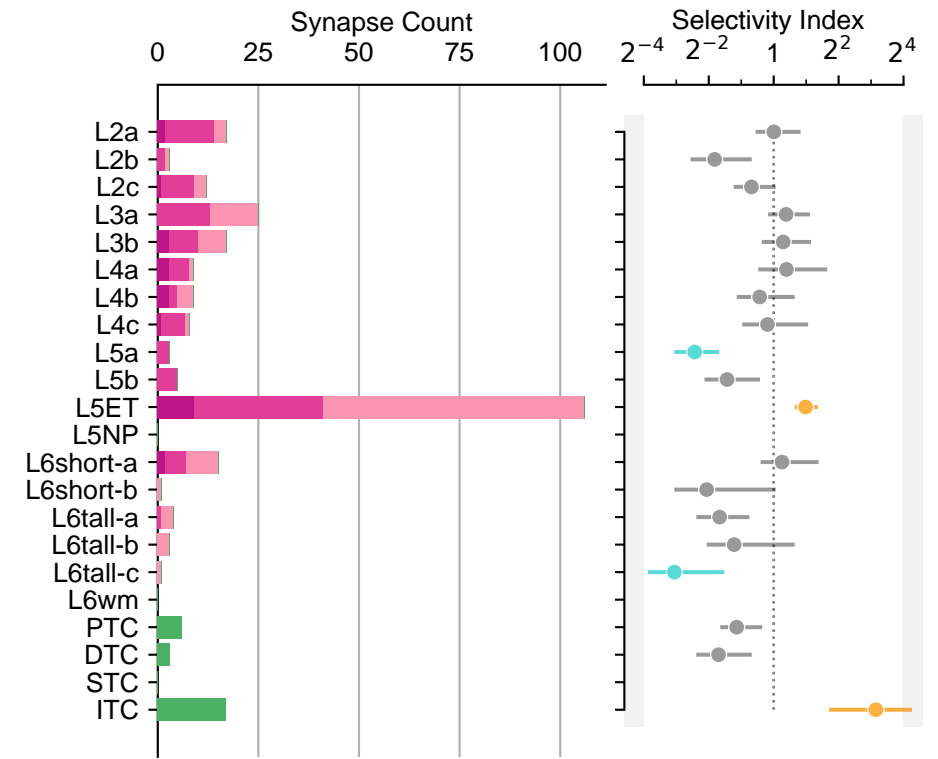

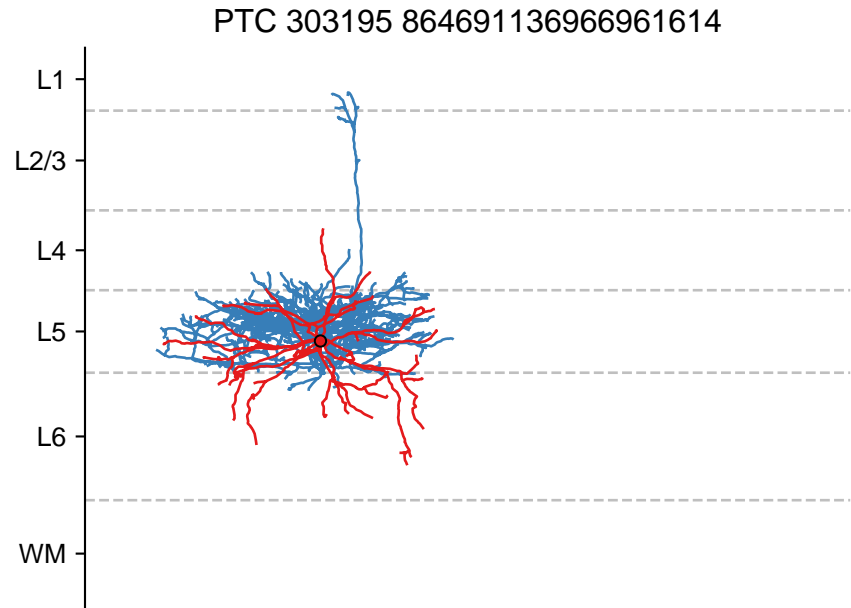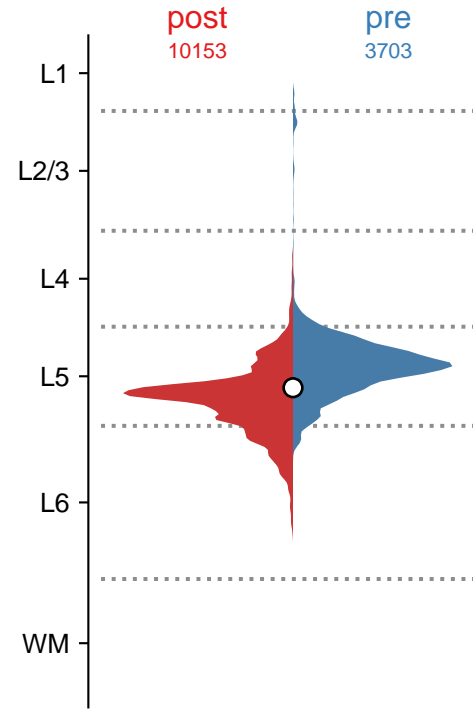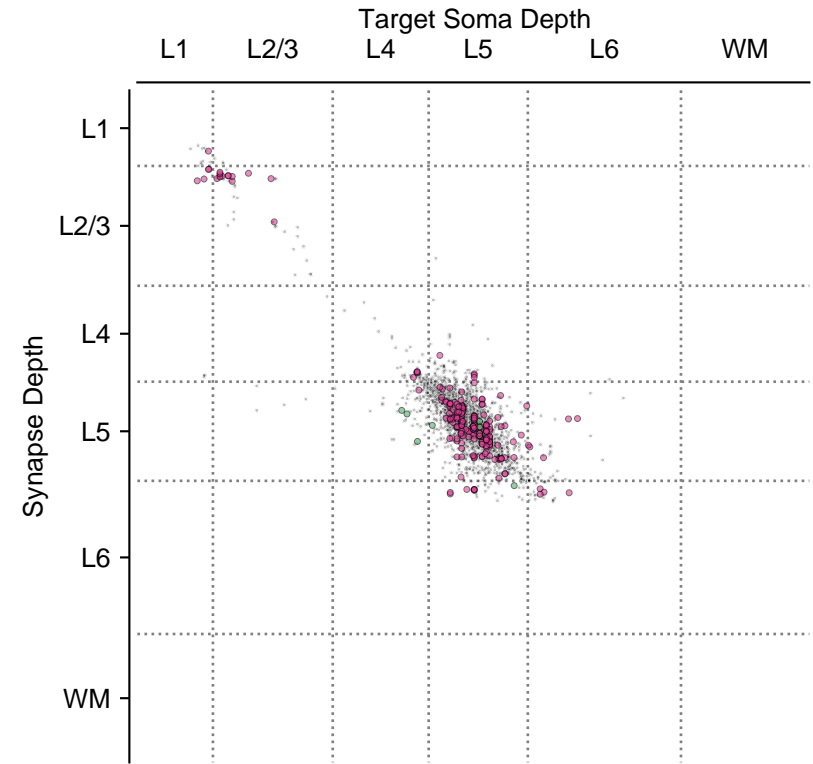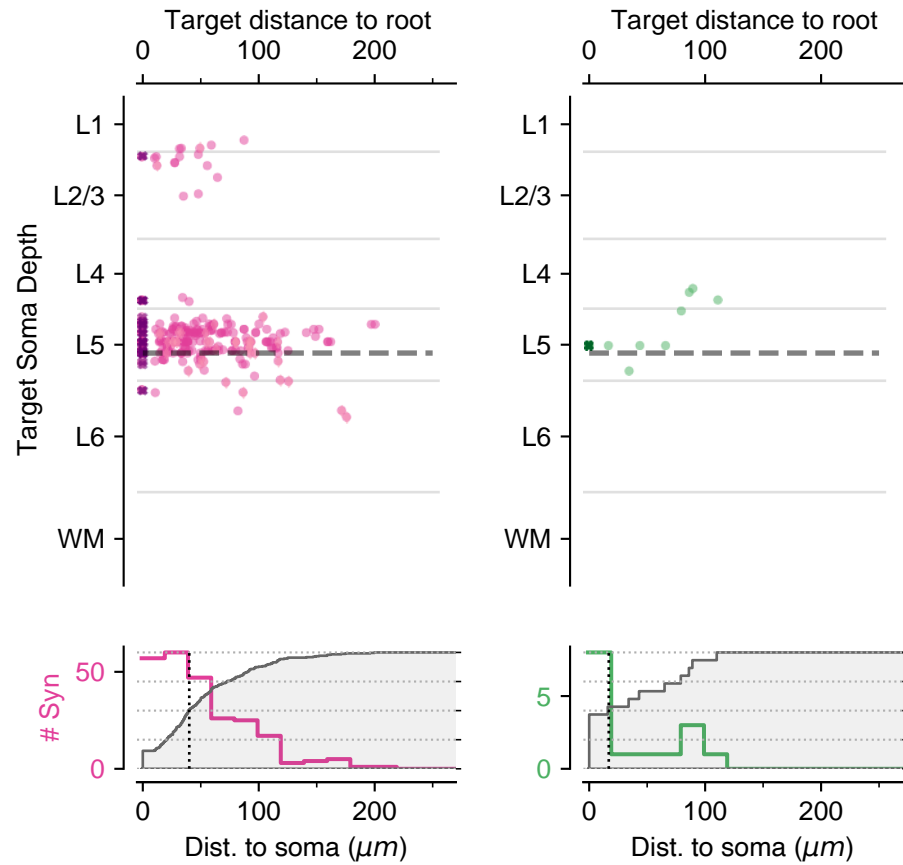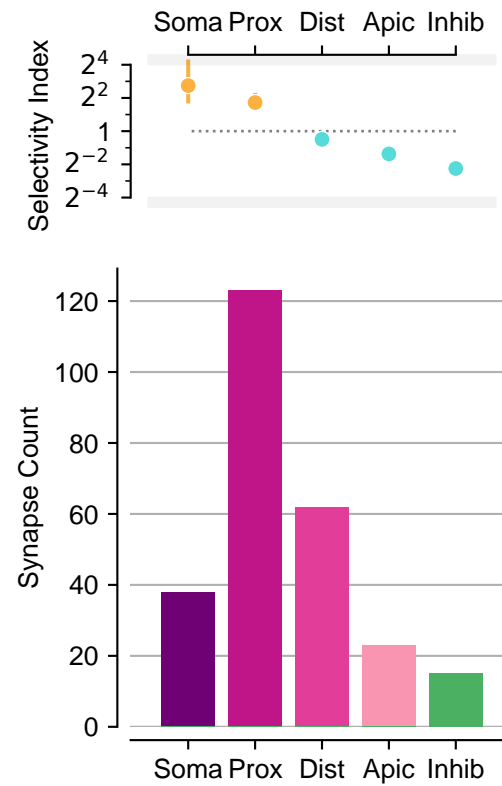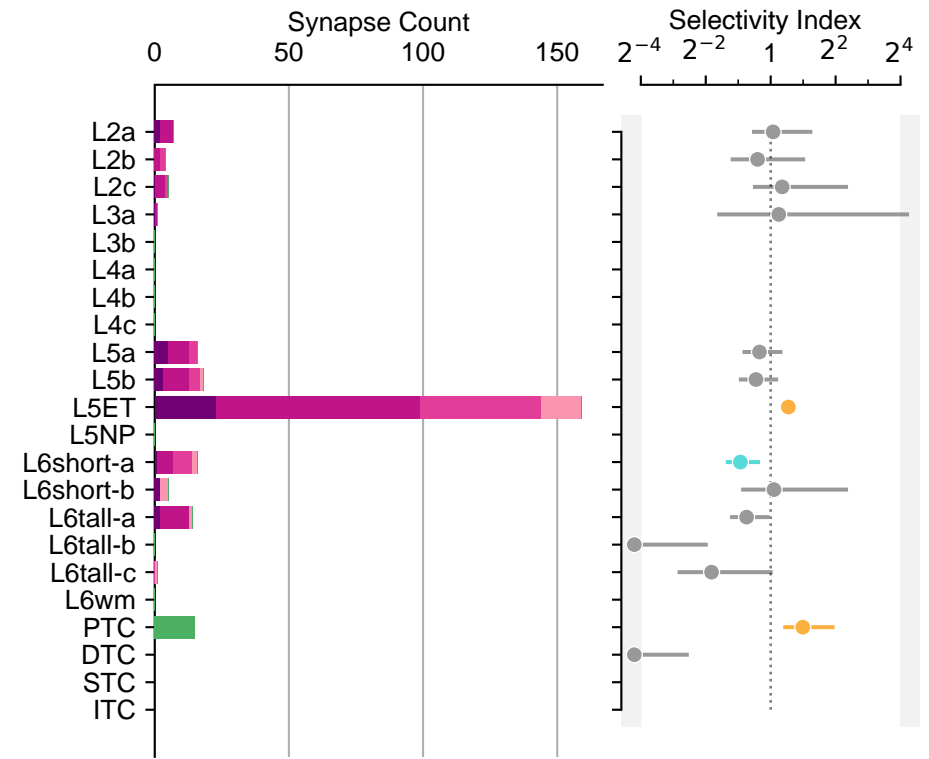

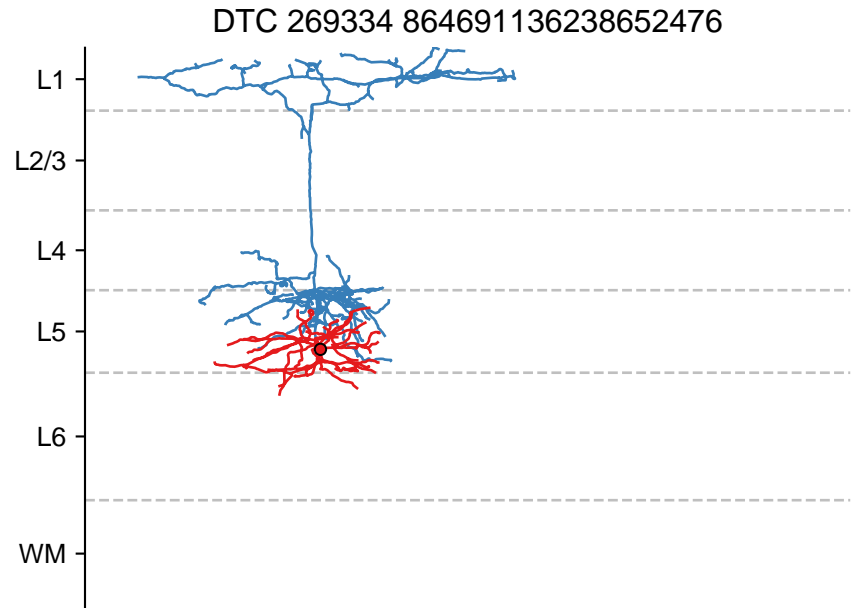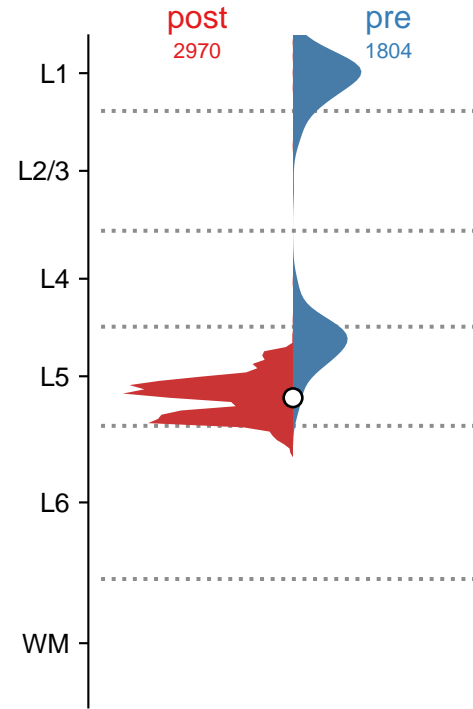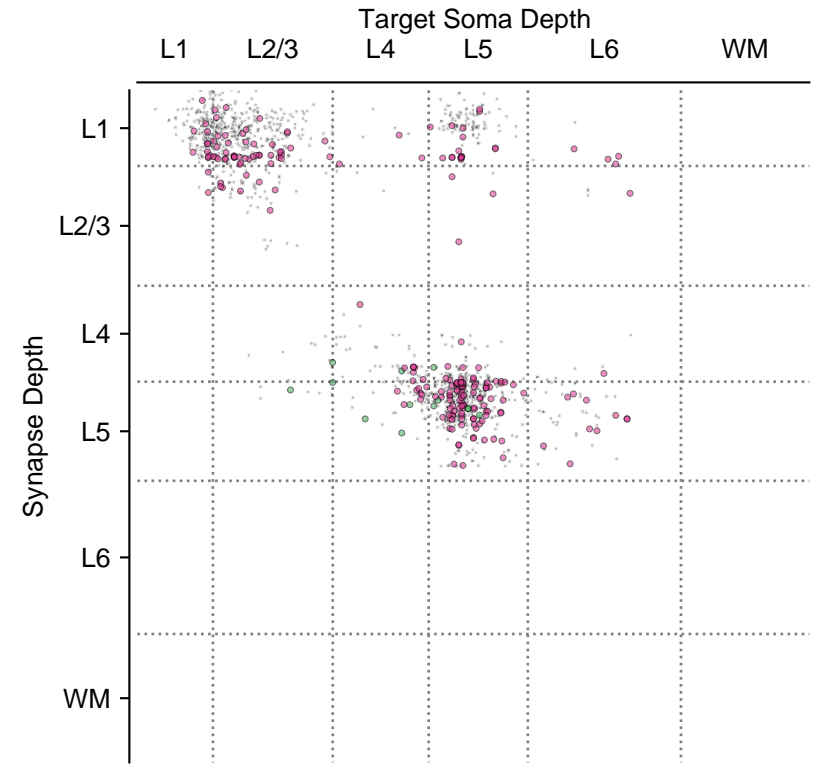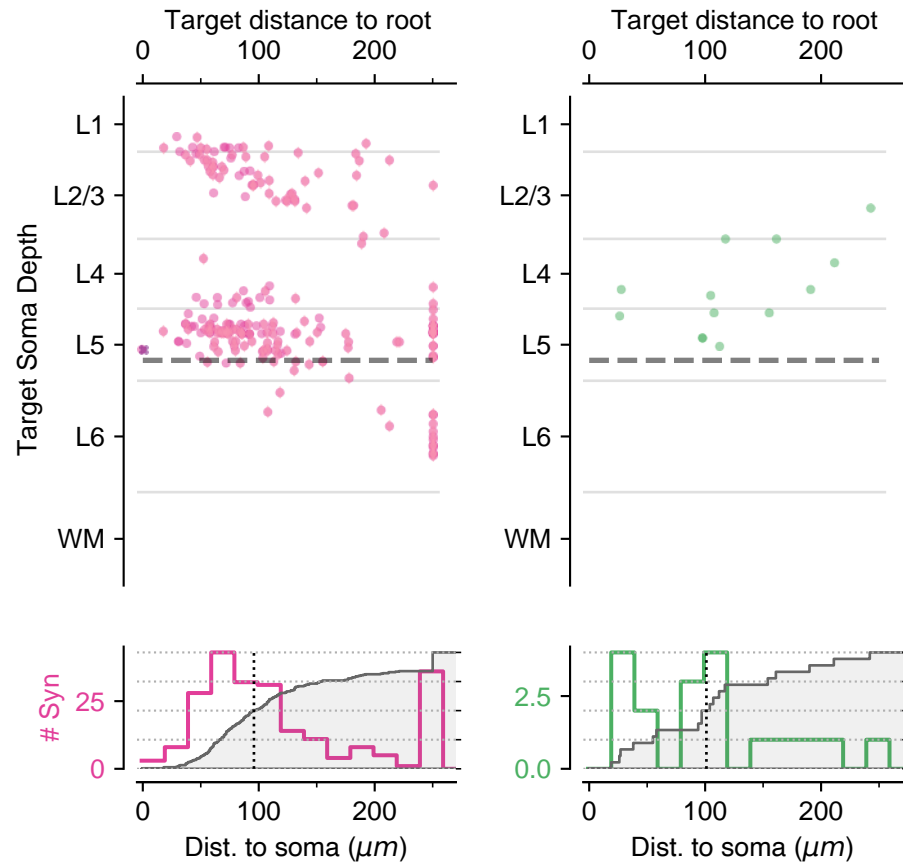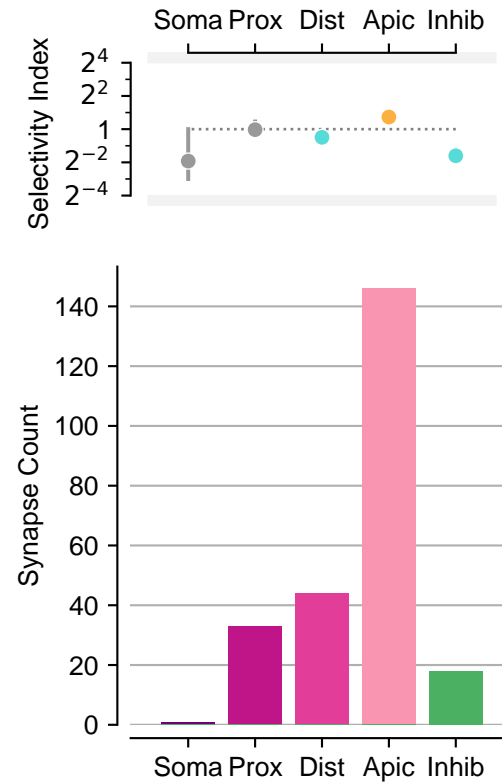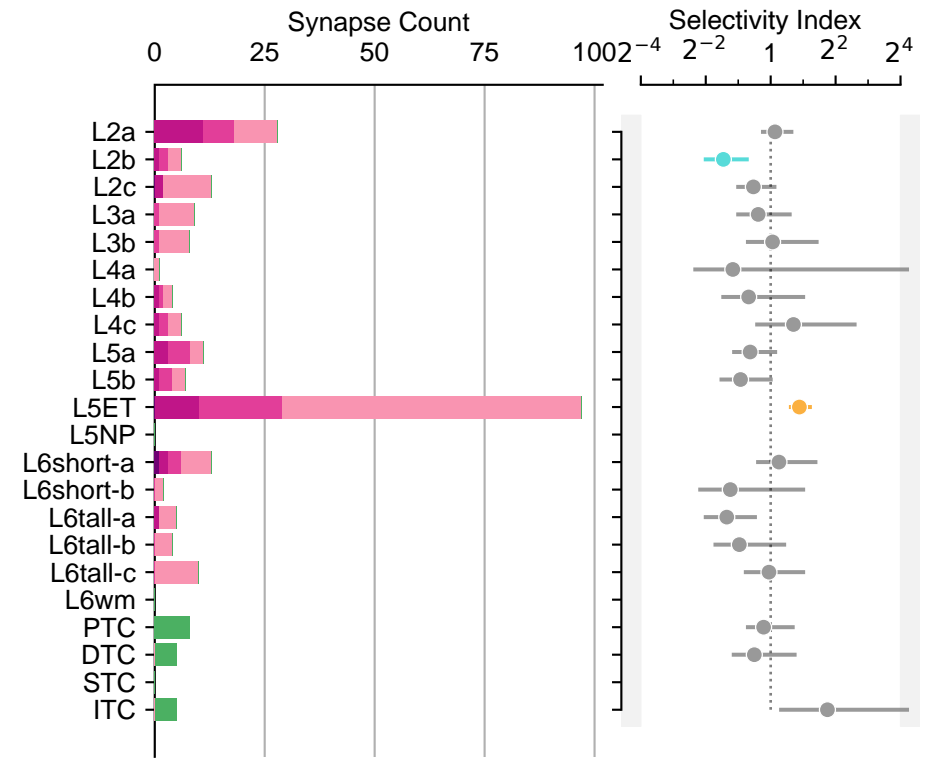

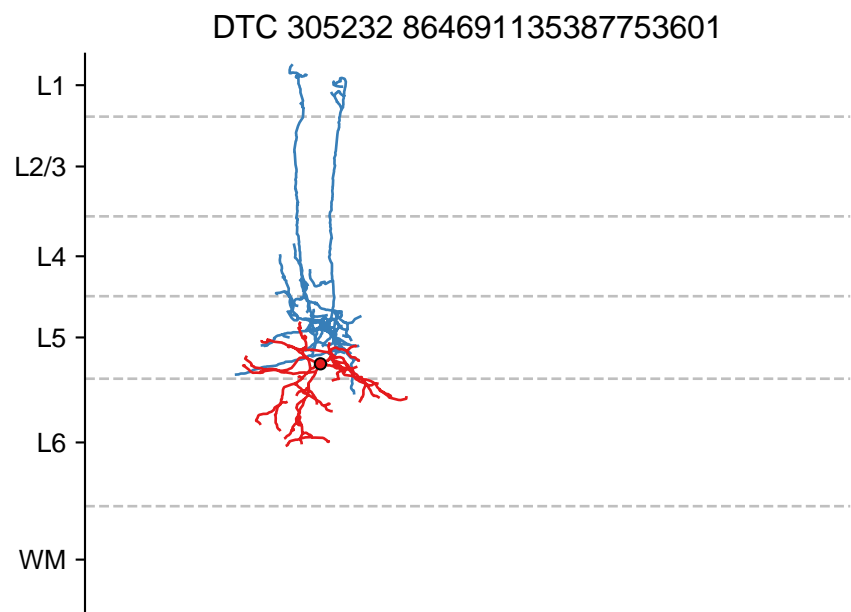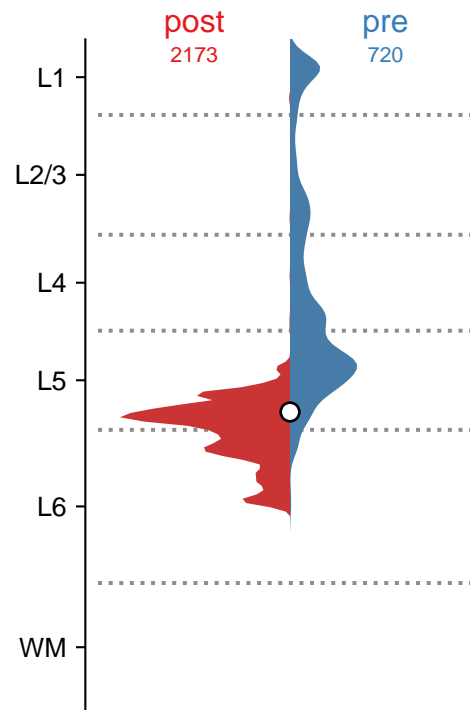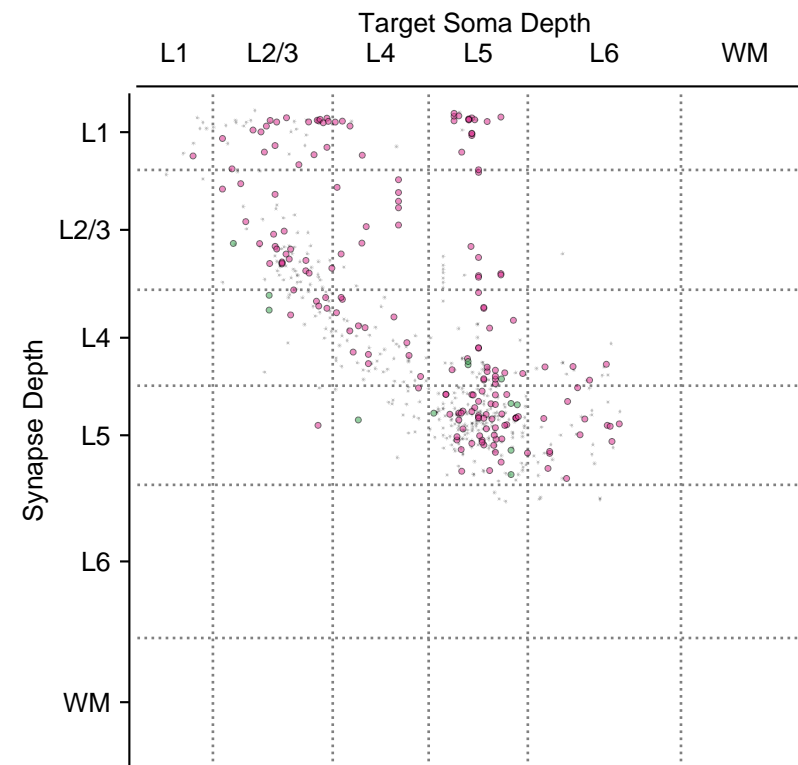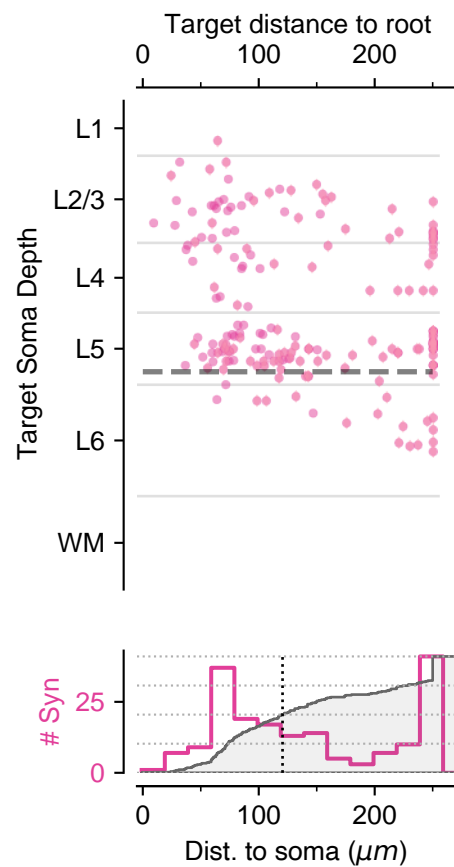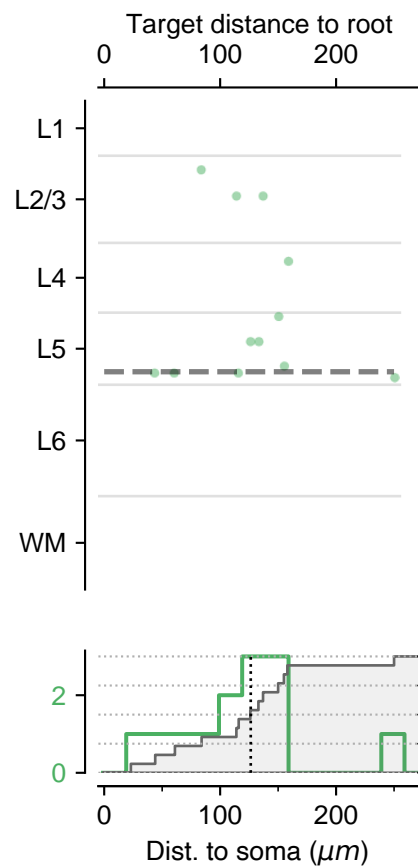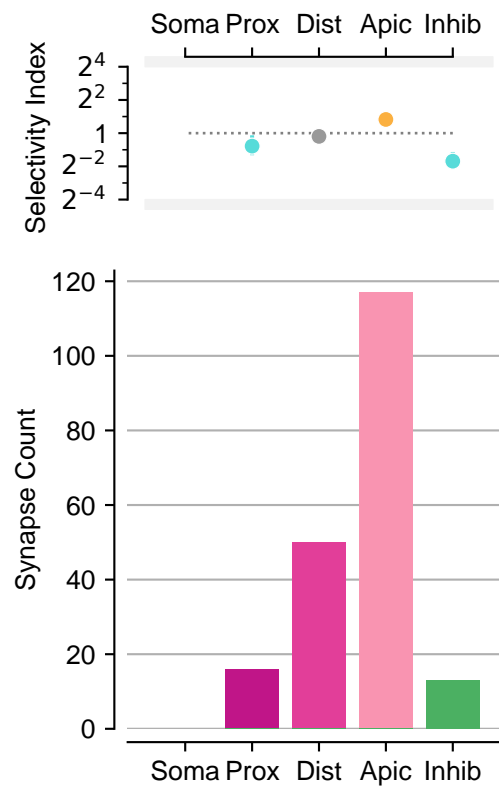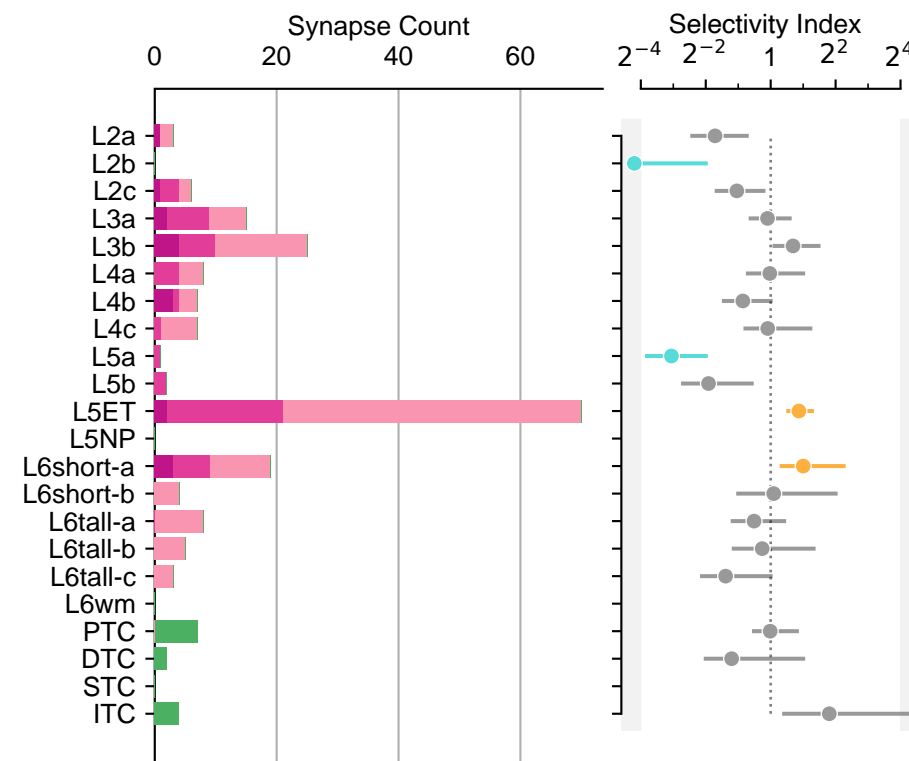

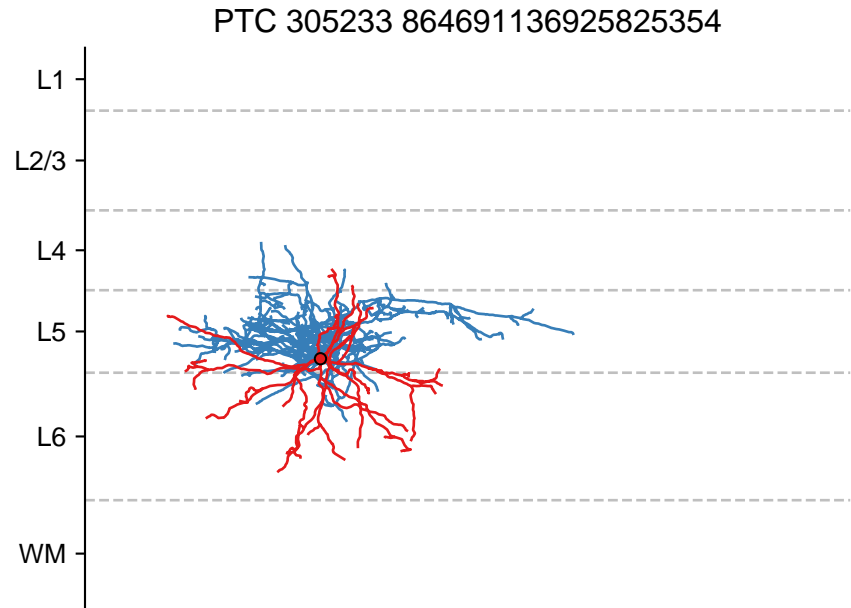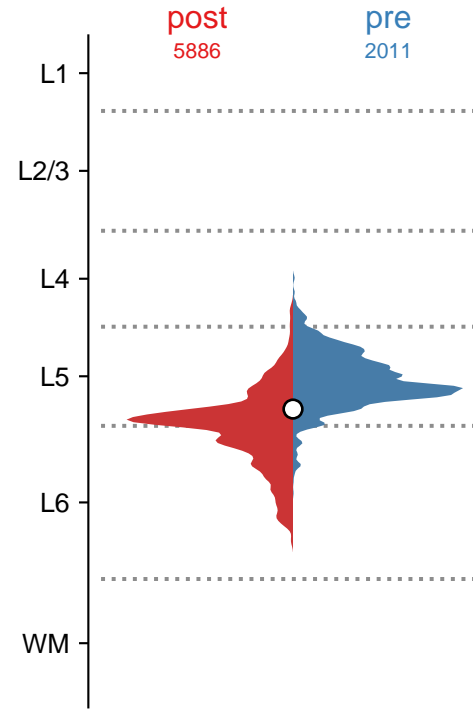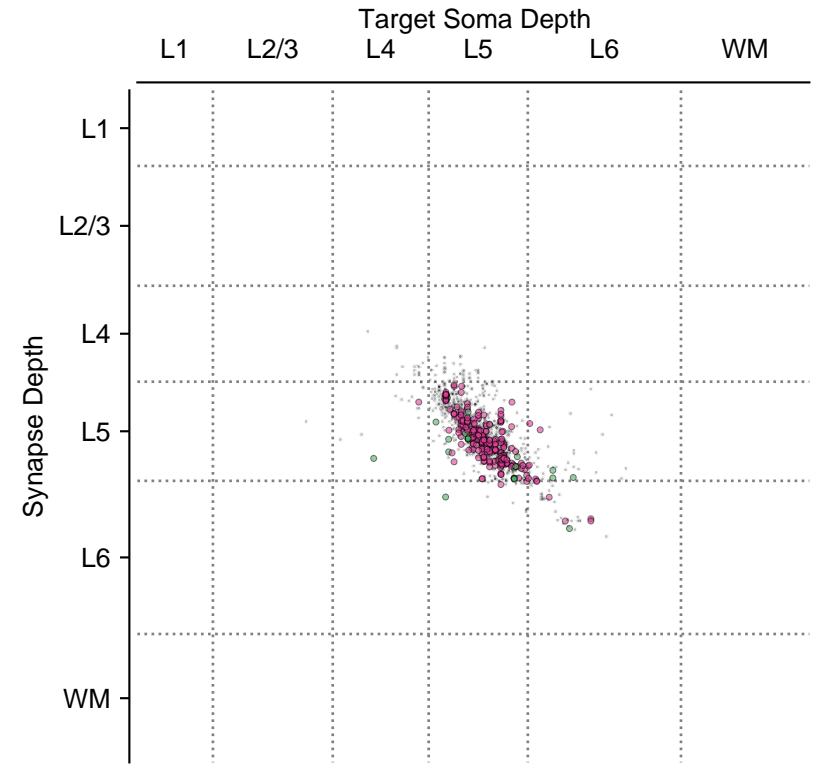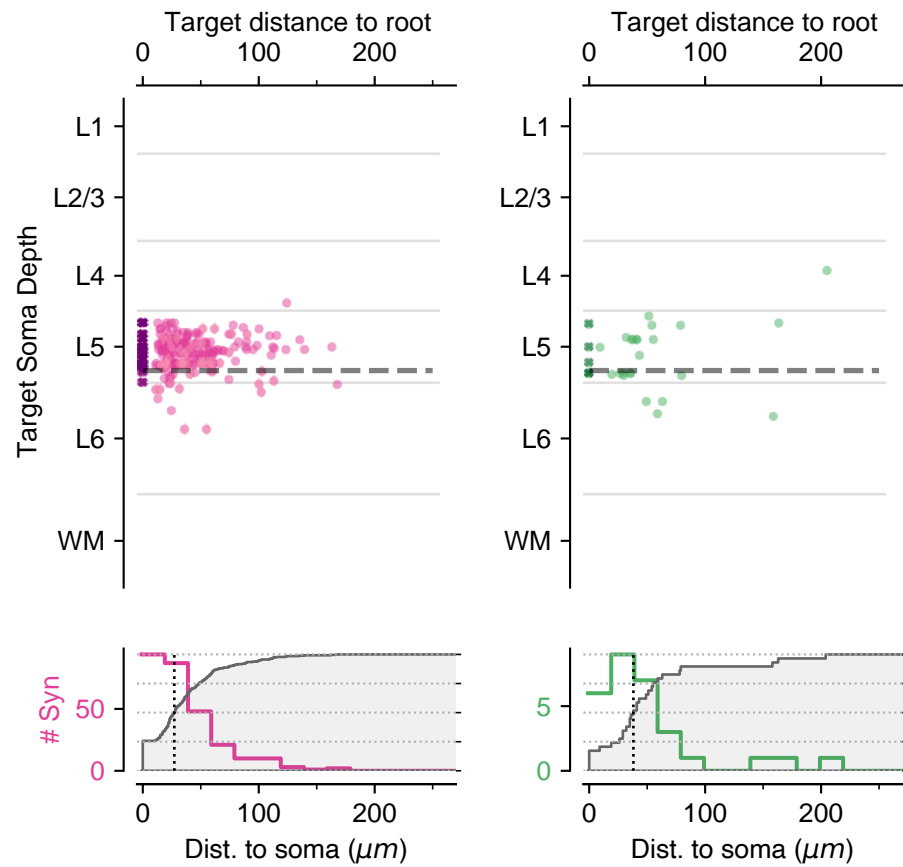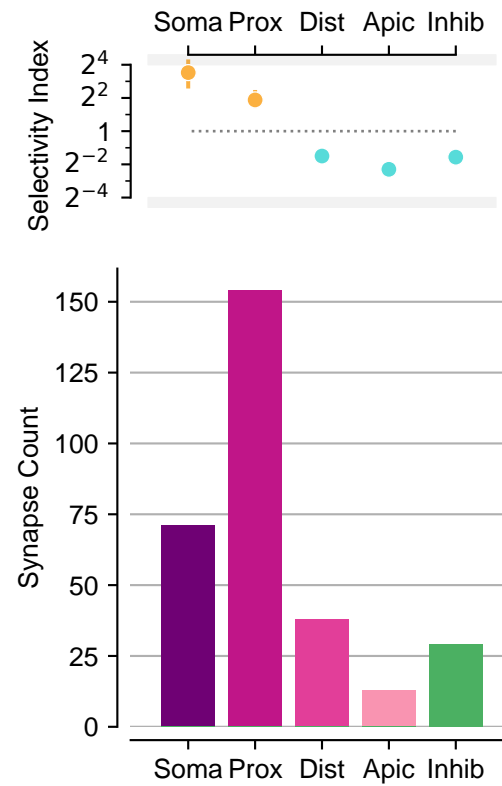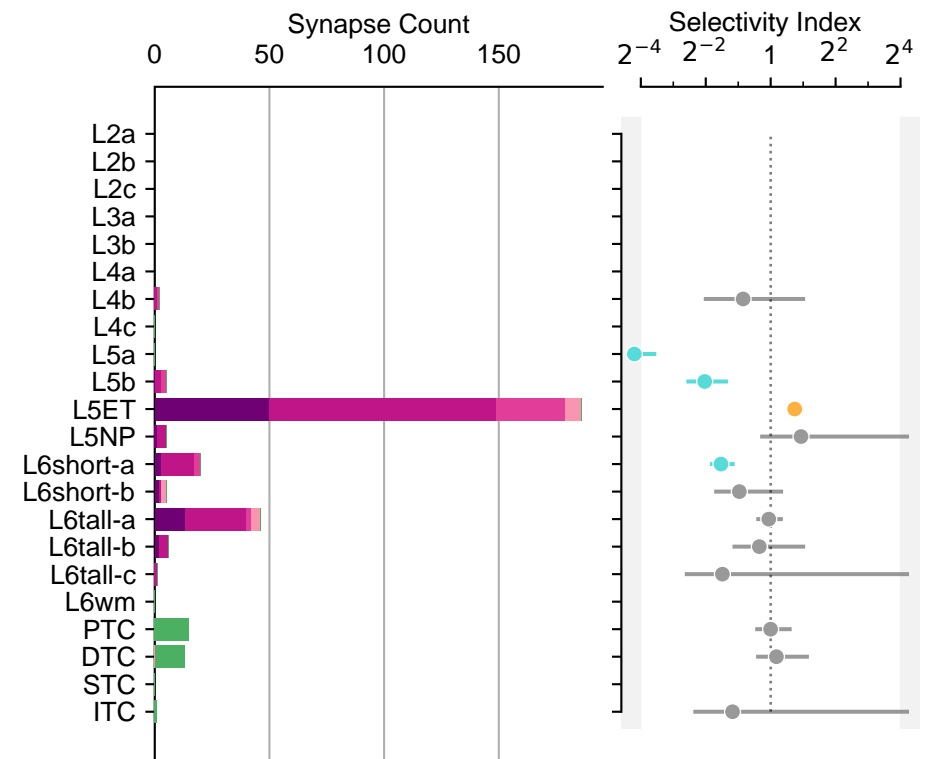

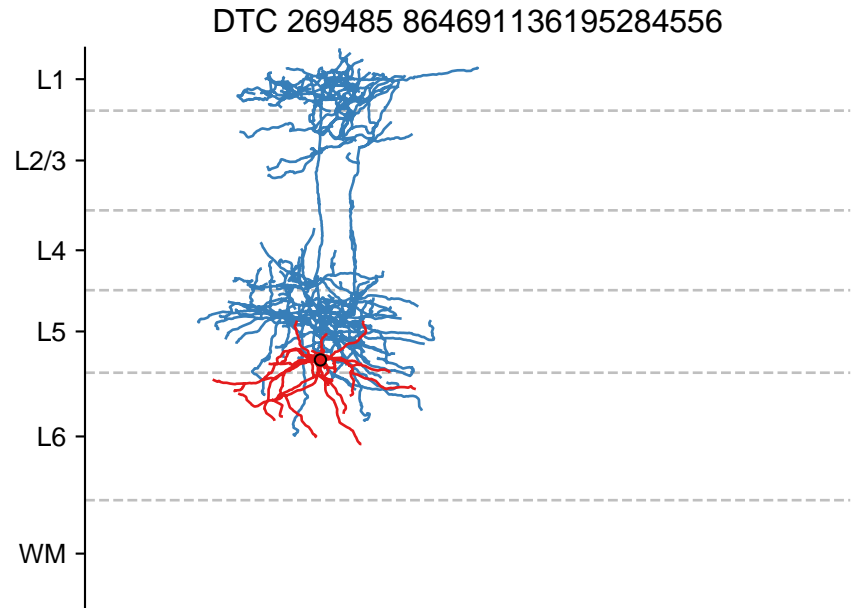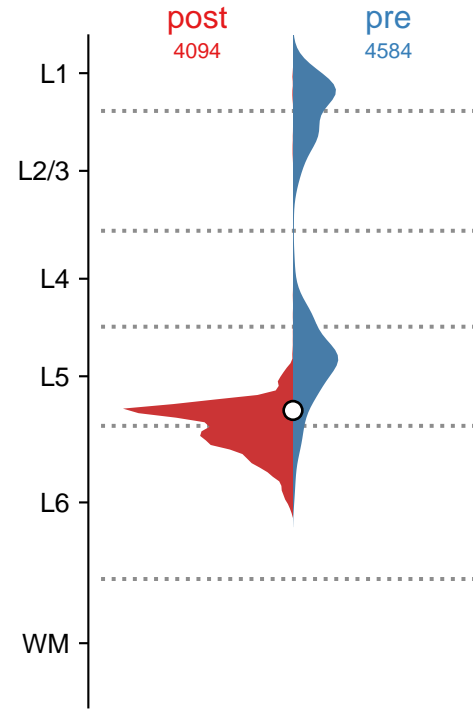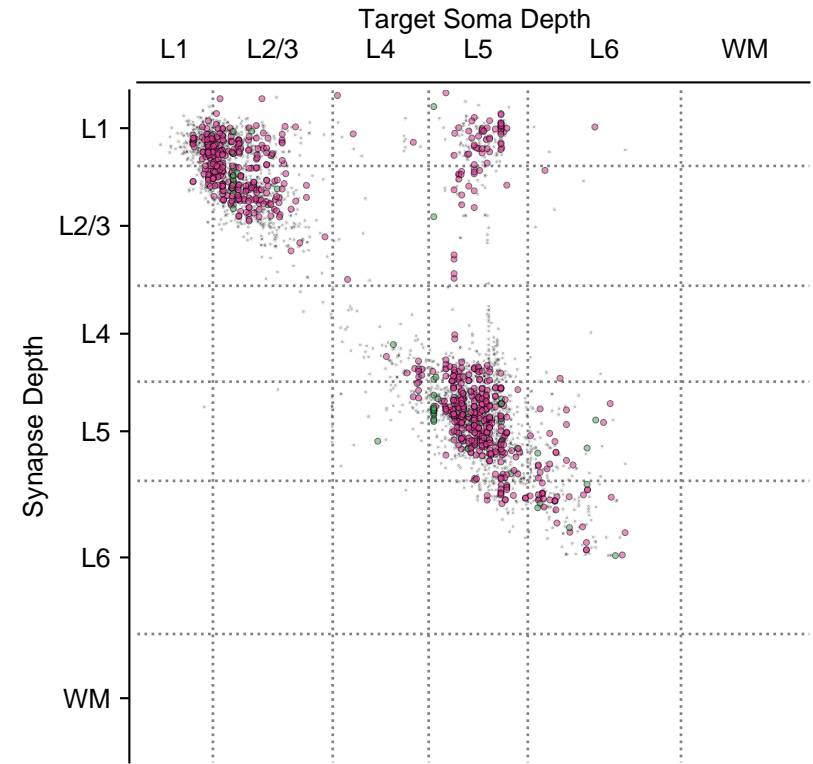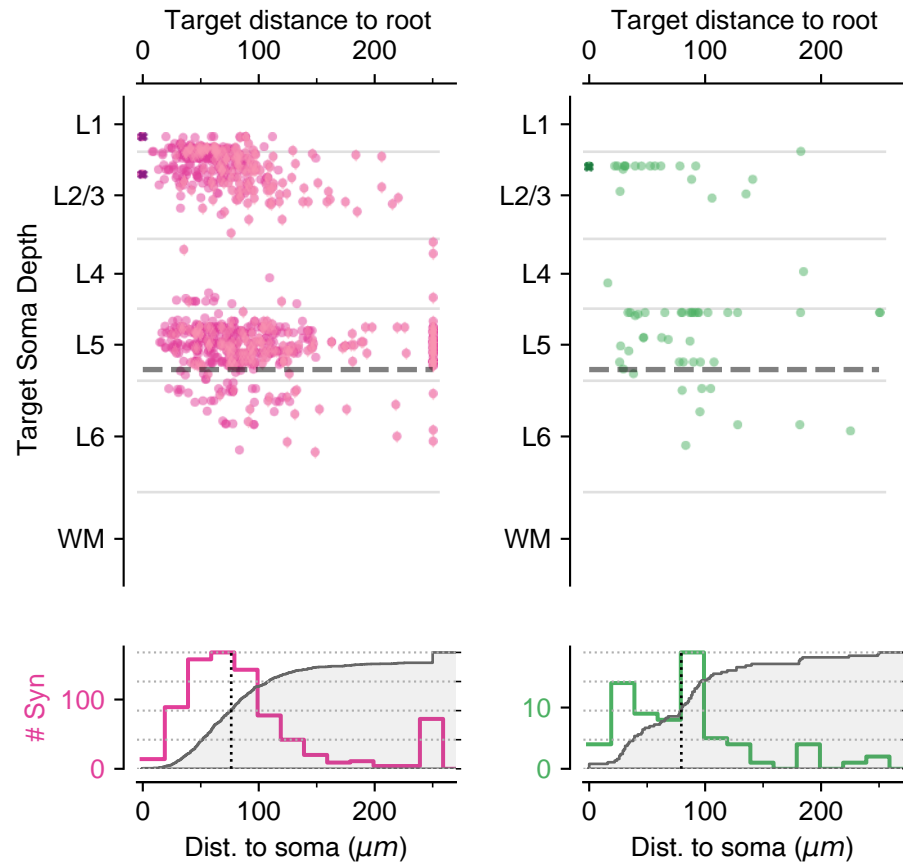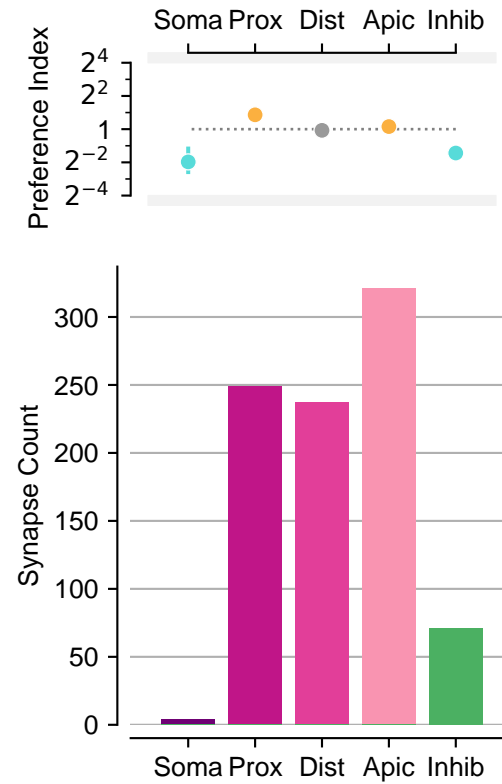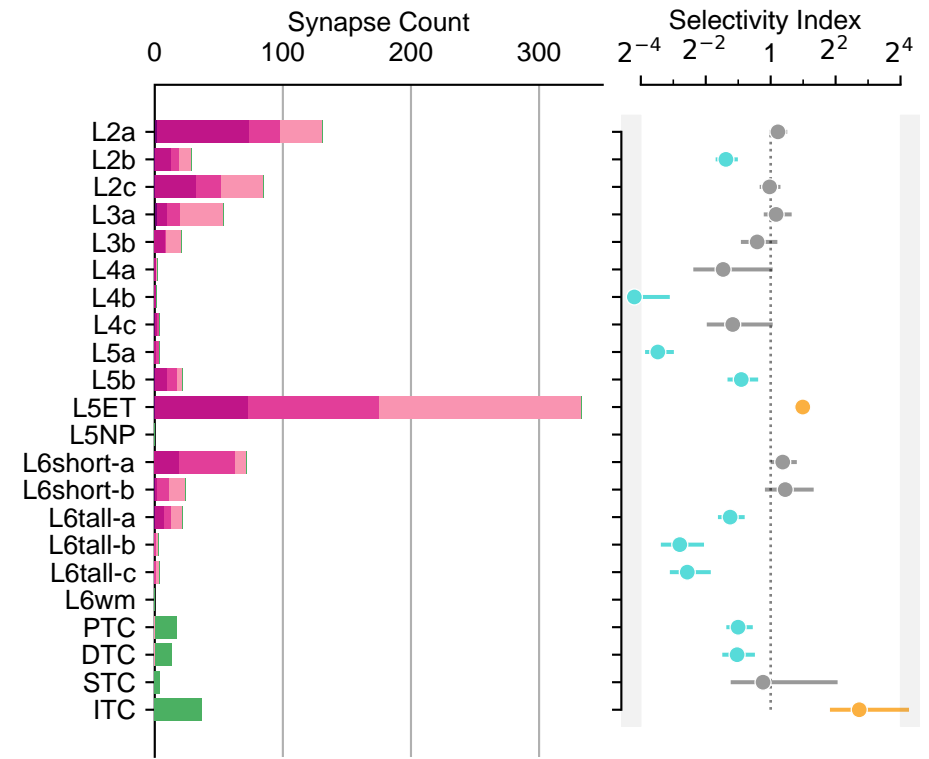



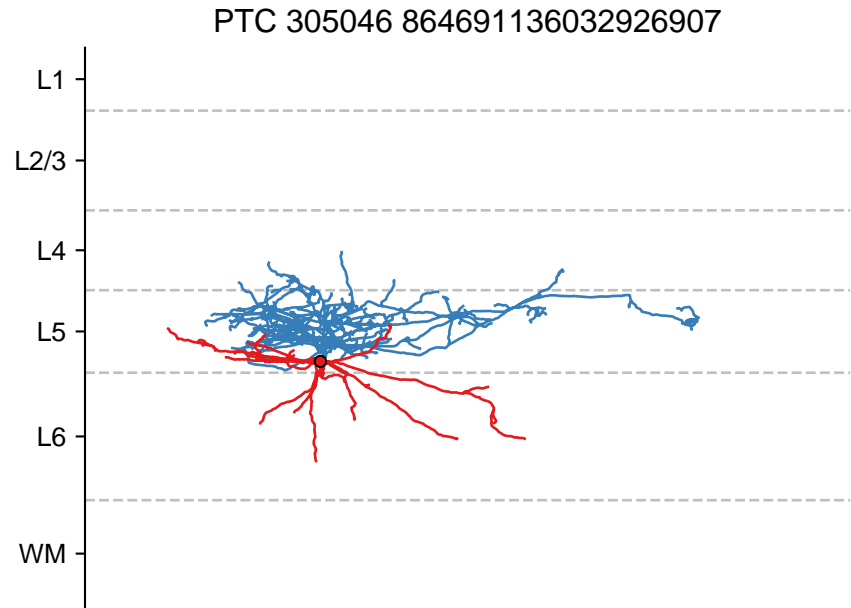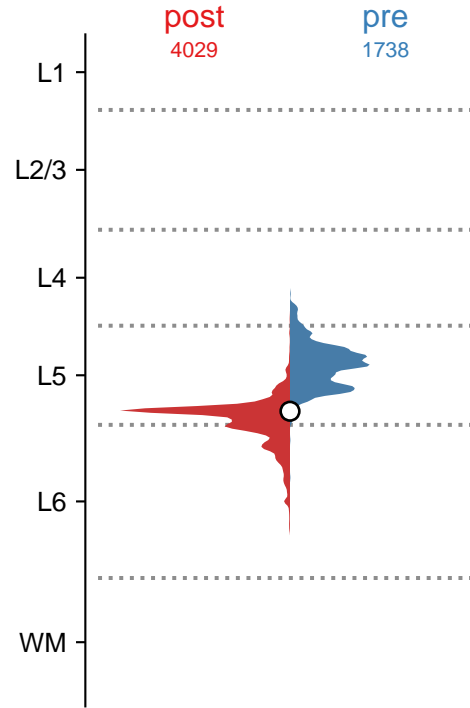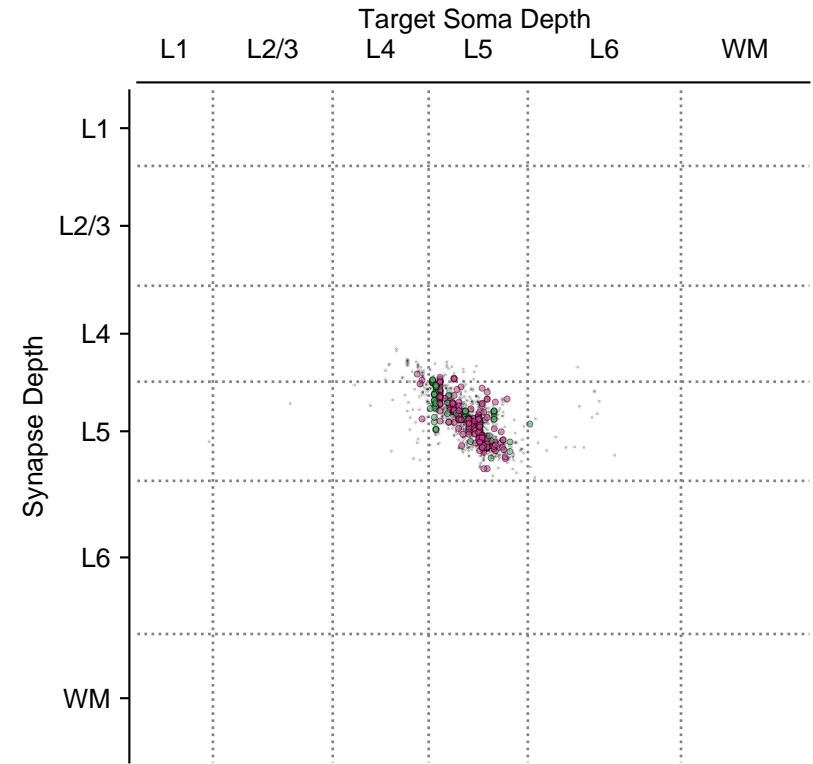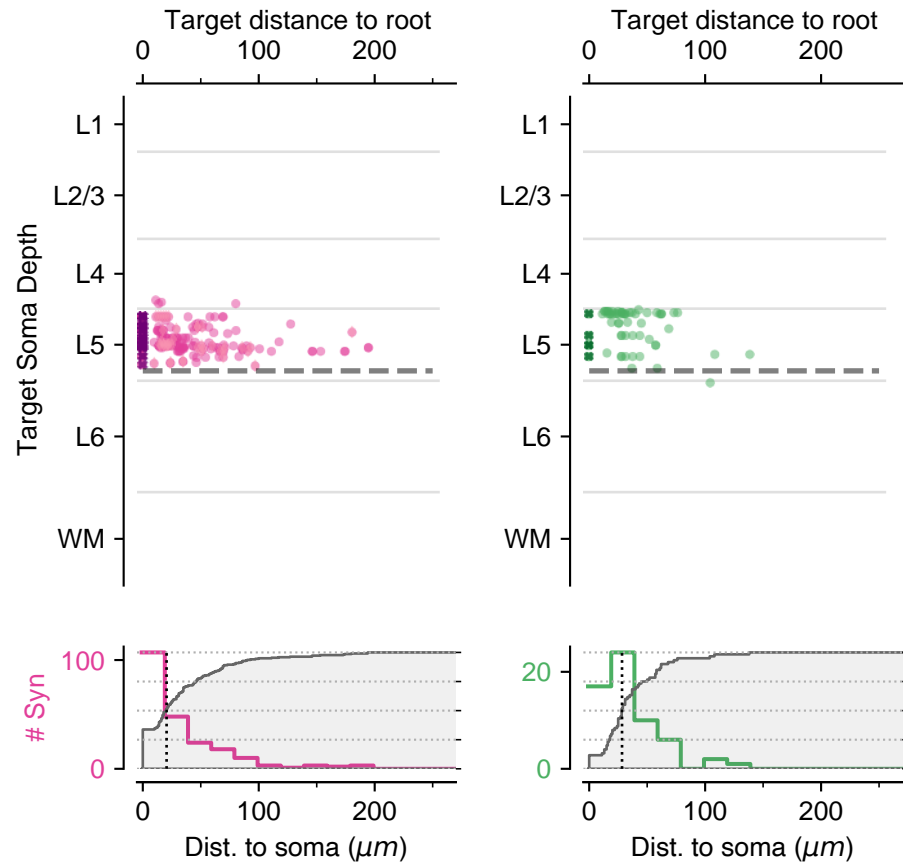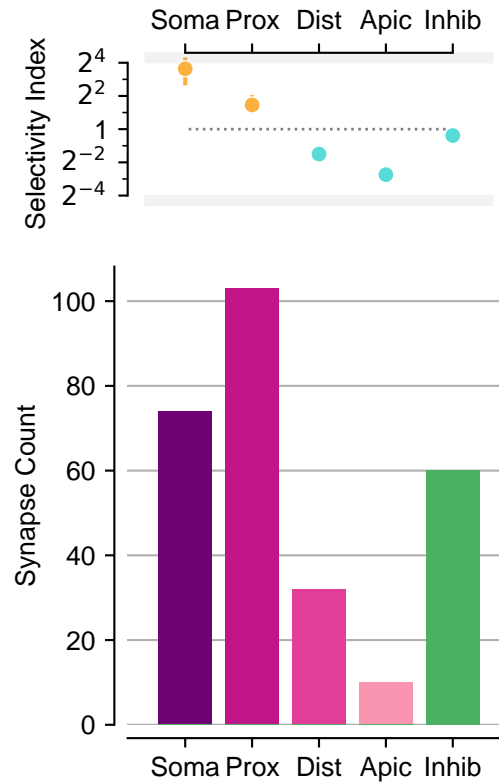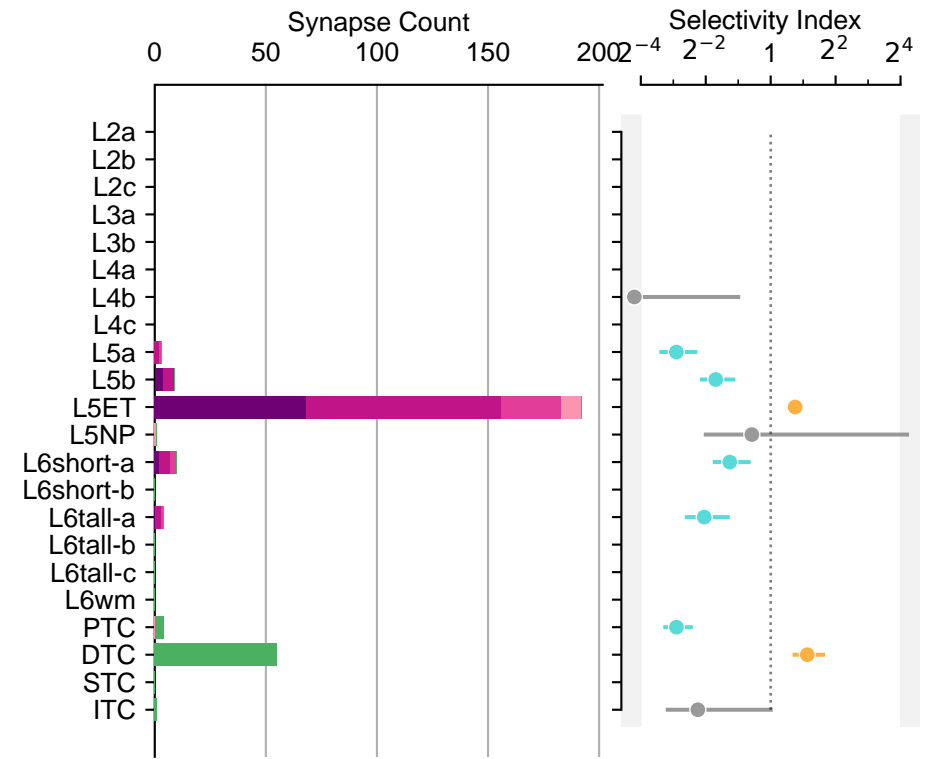

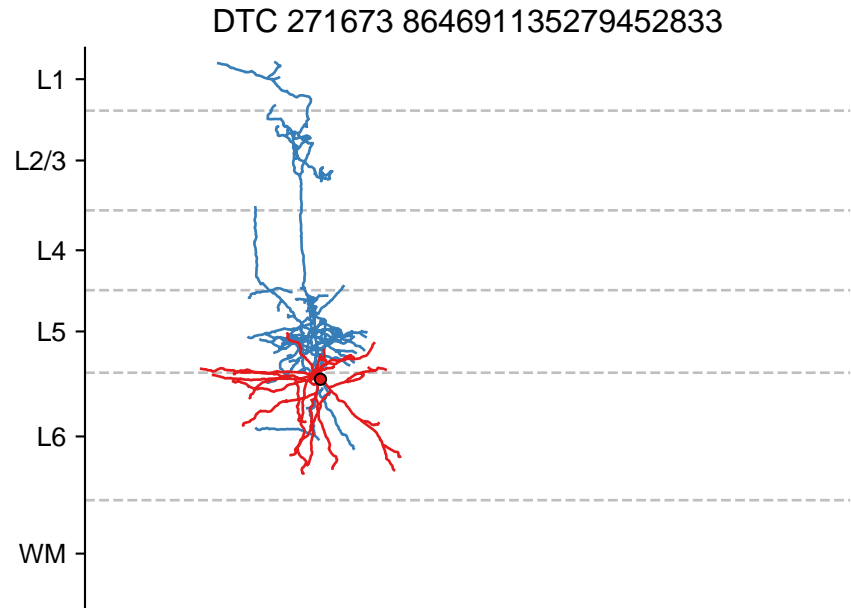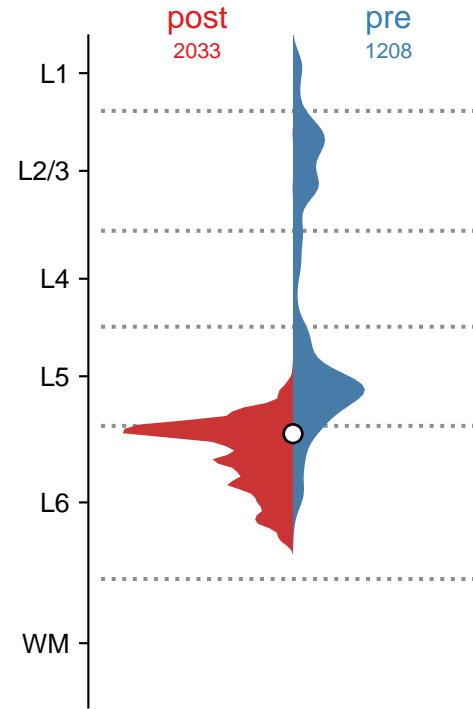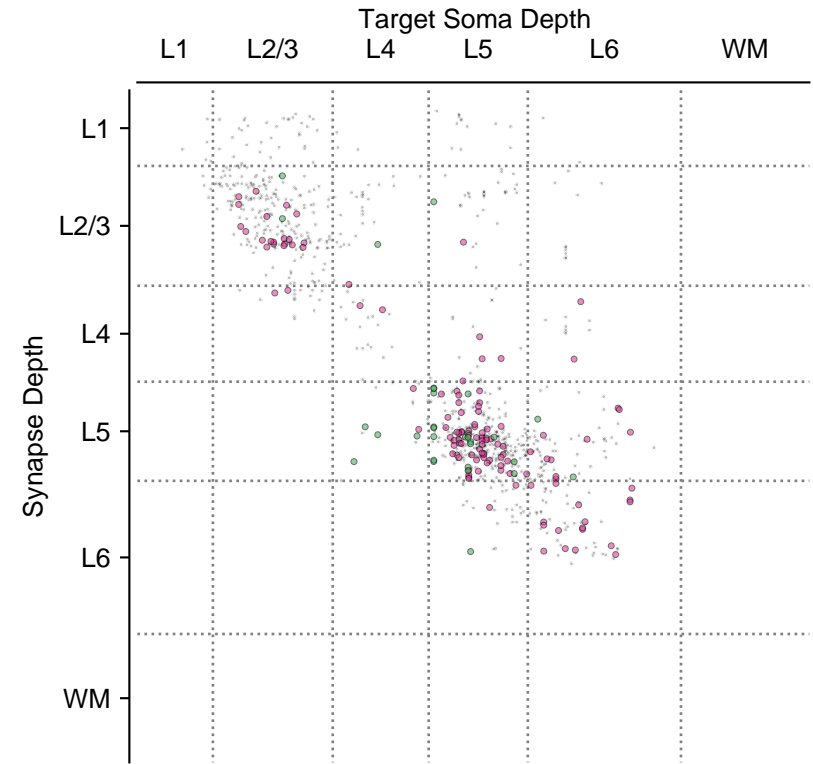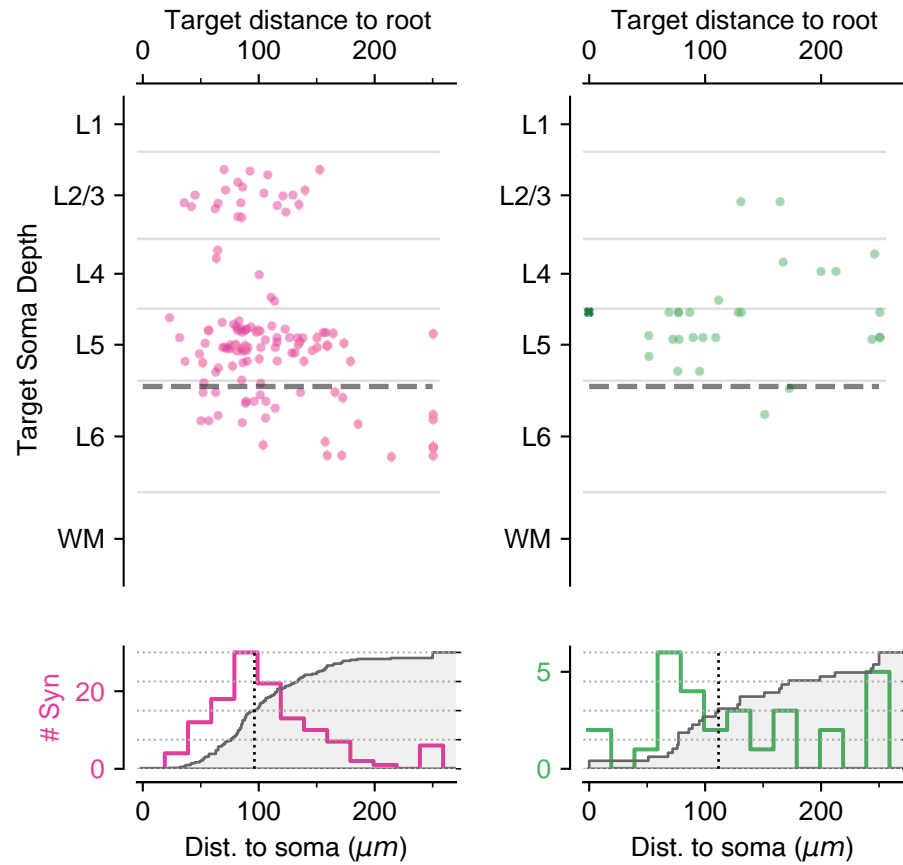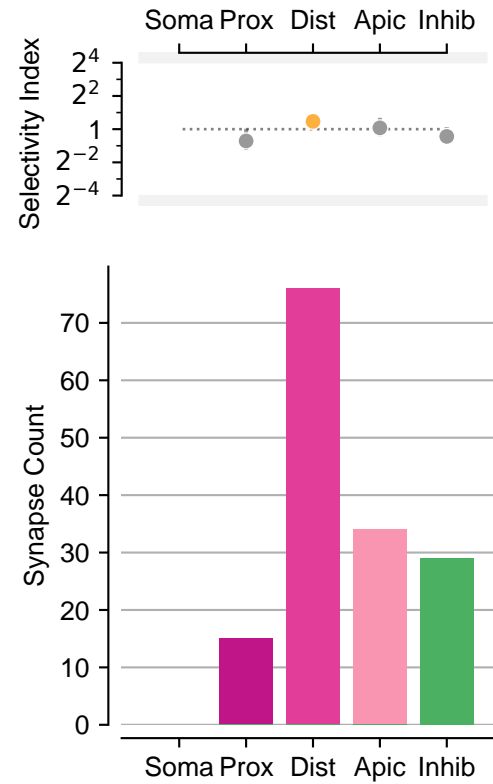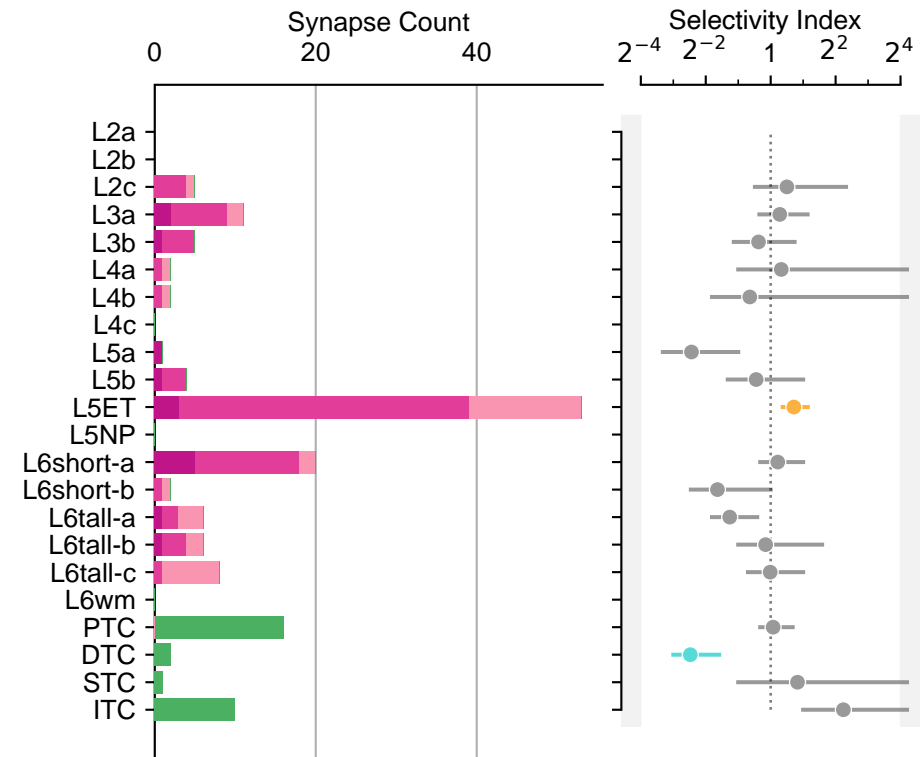

# Motif Group 10

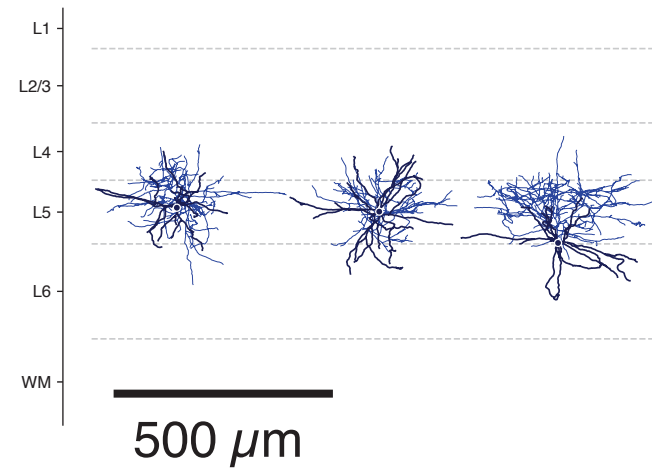

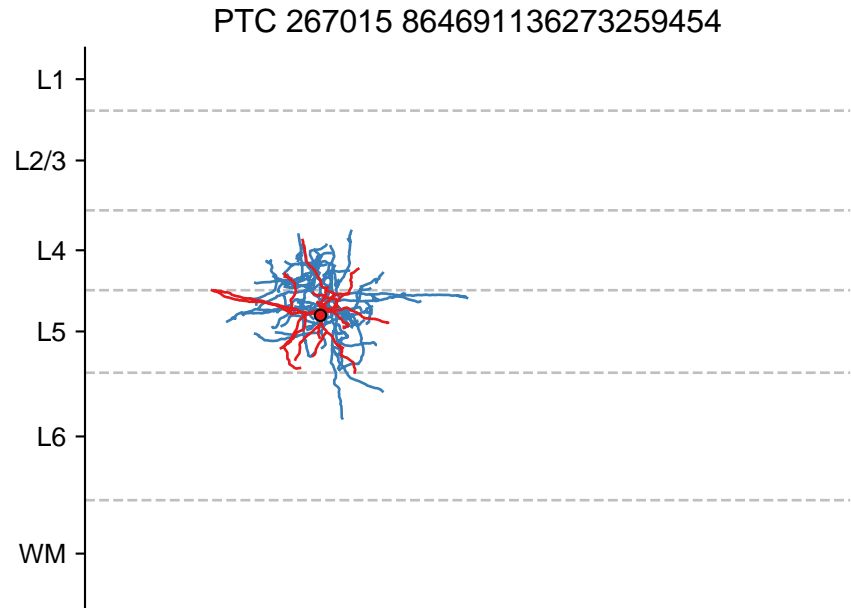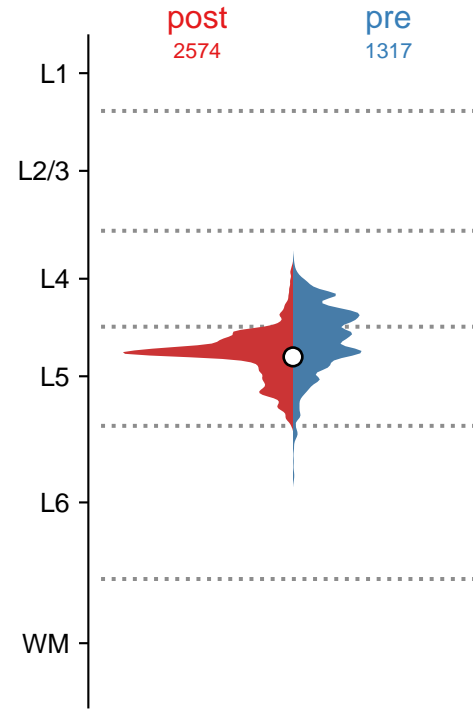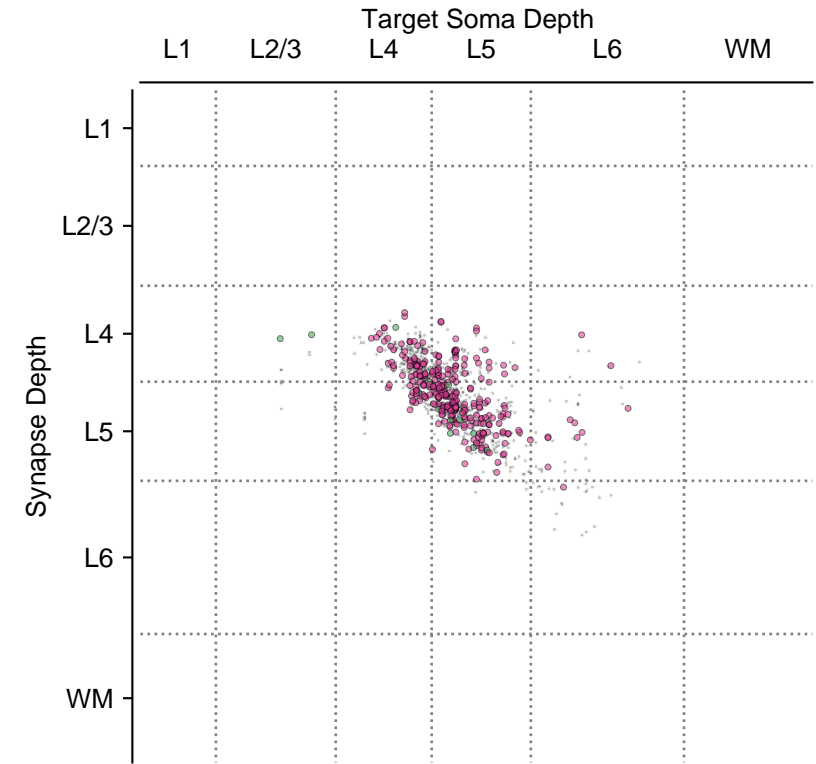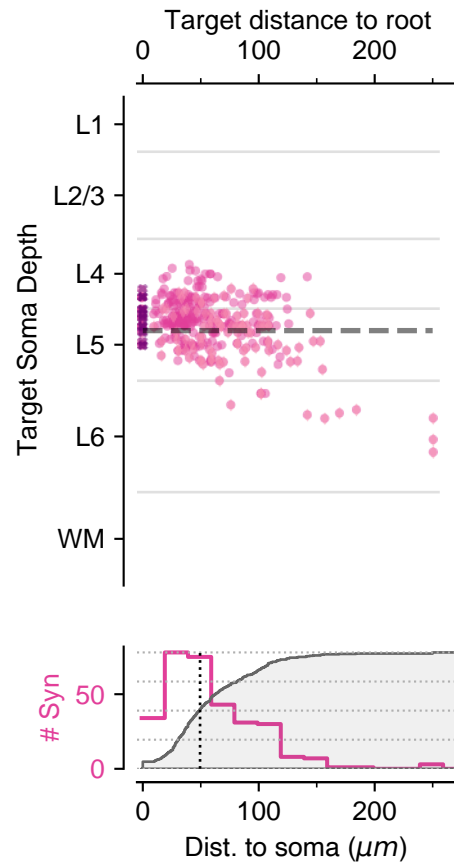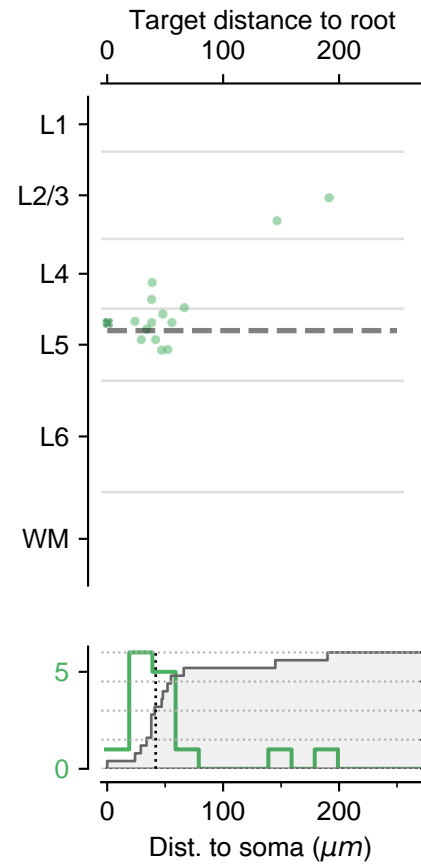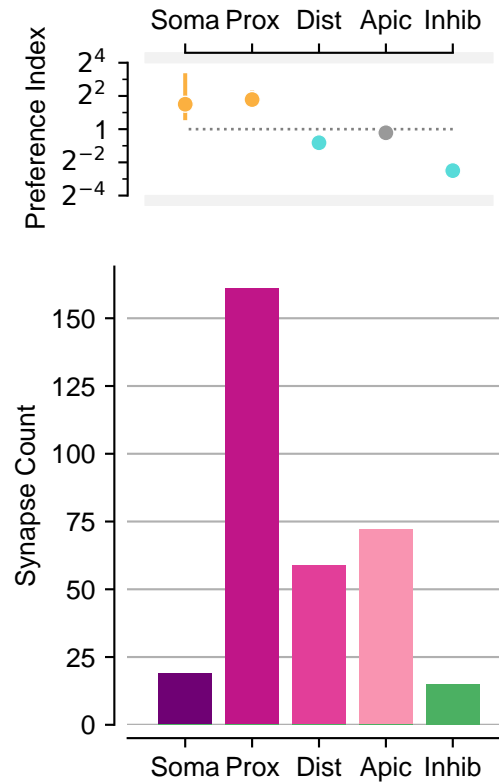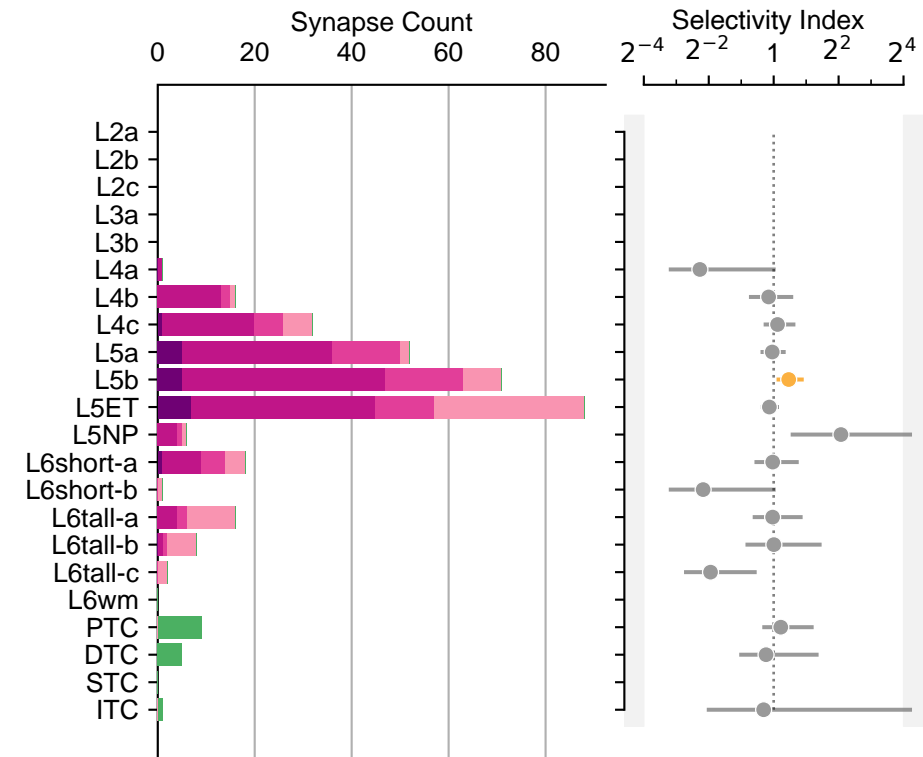

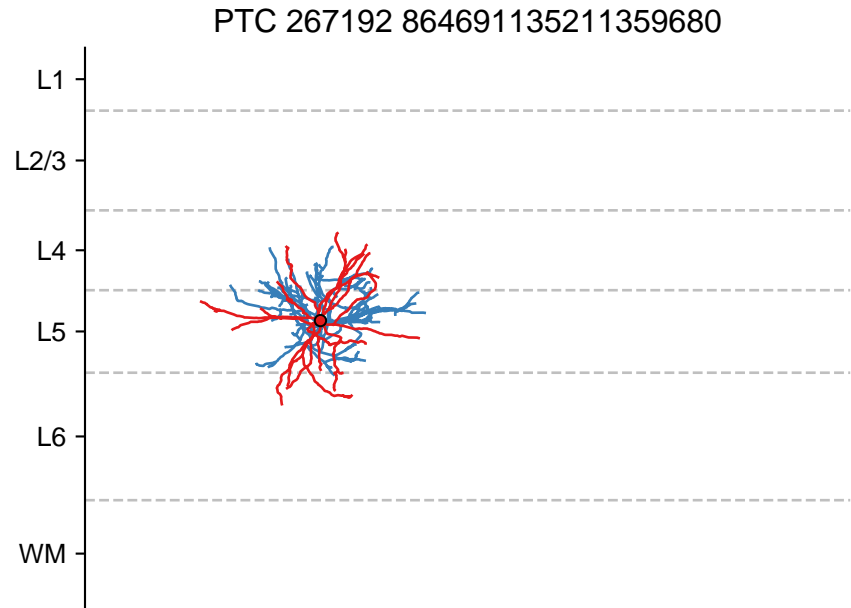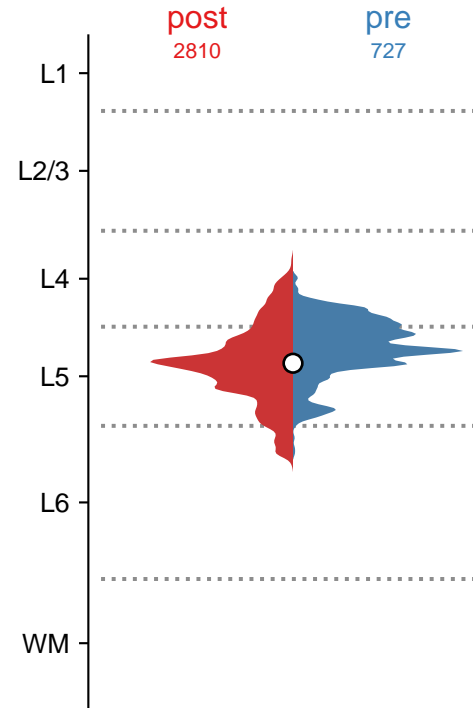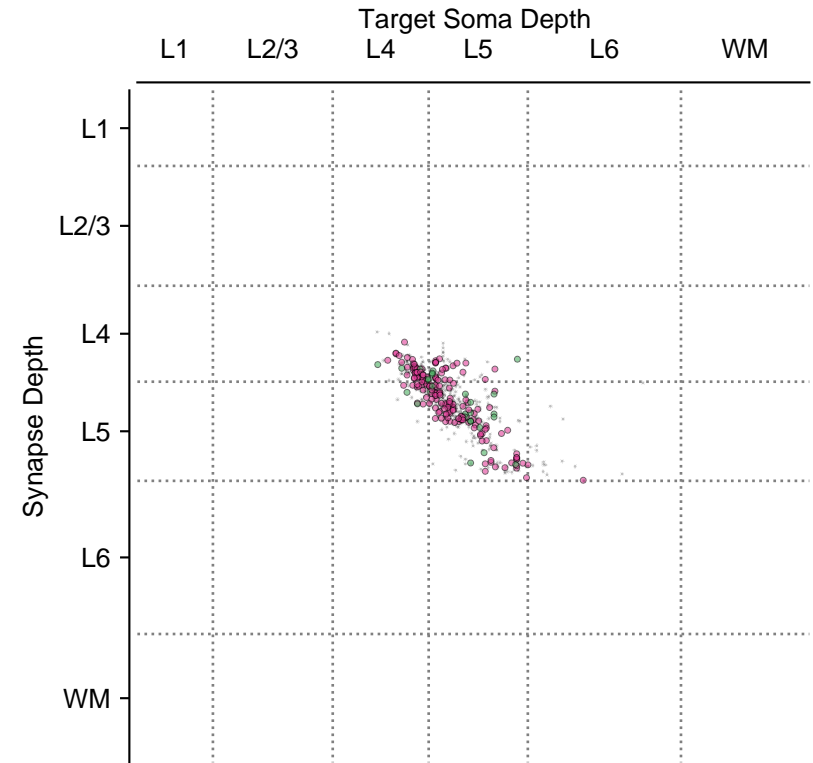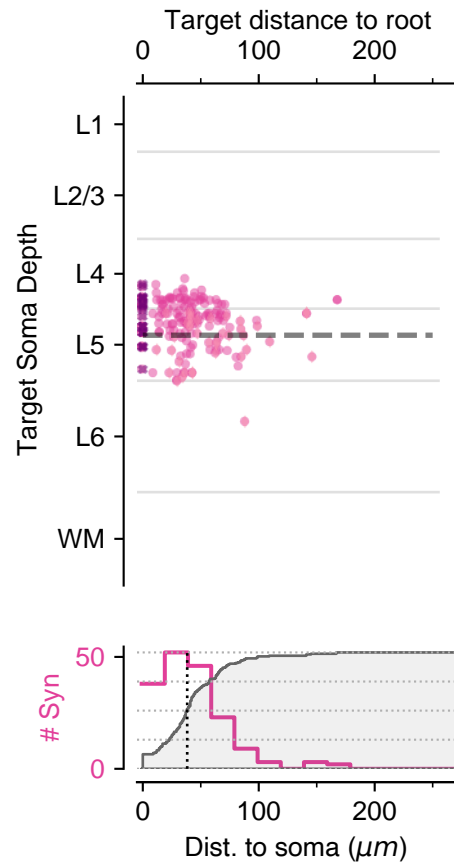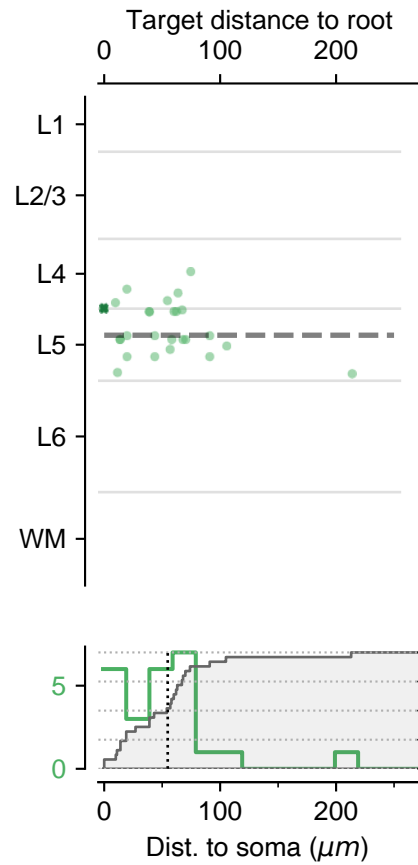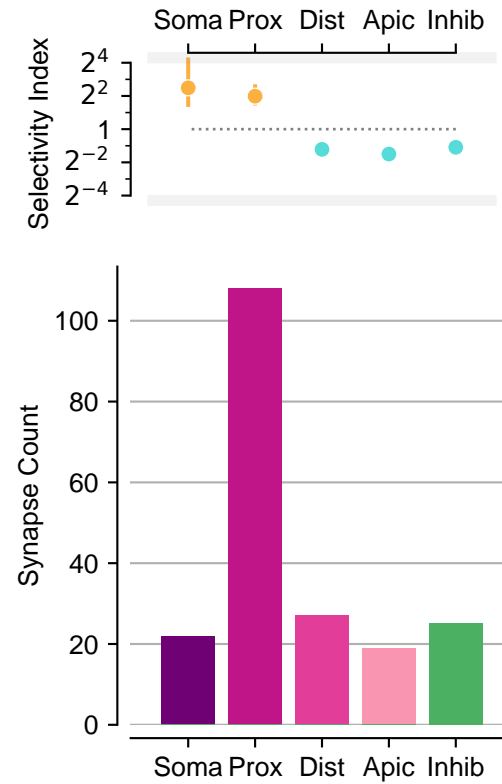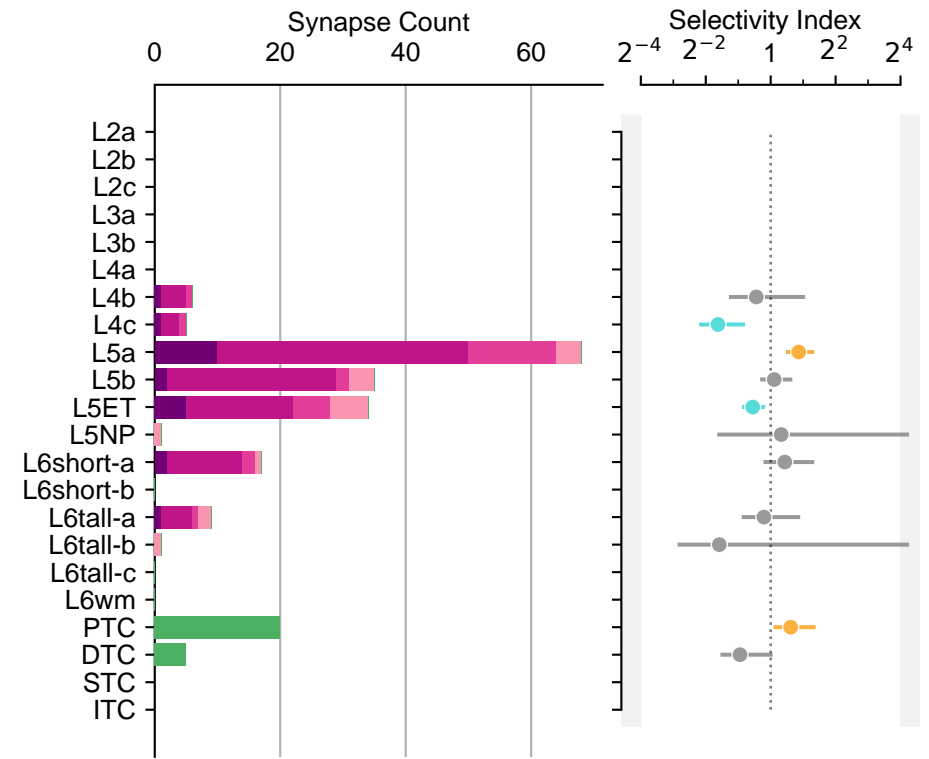

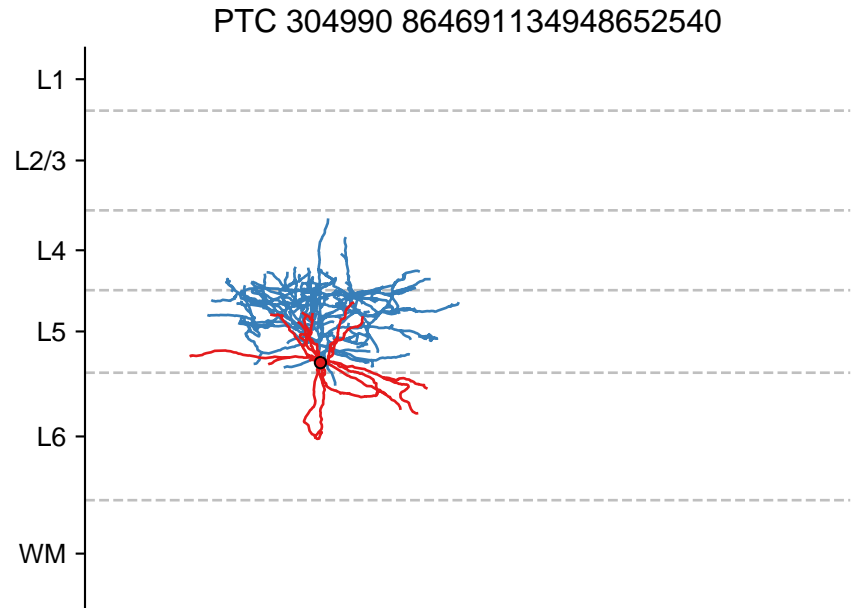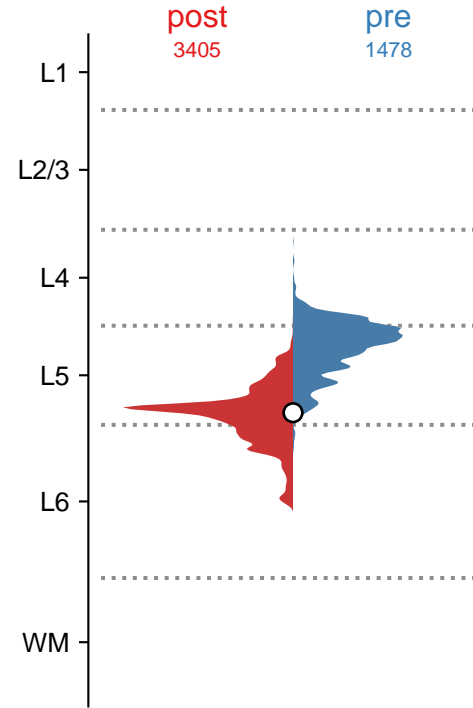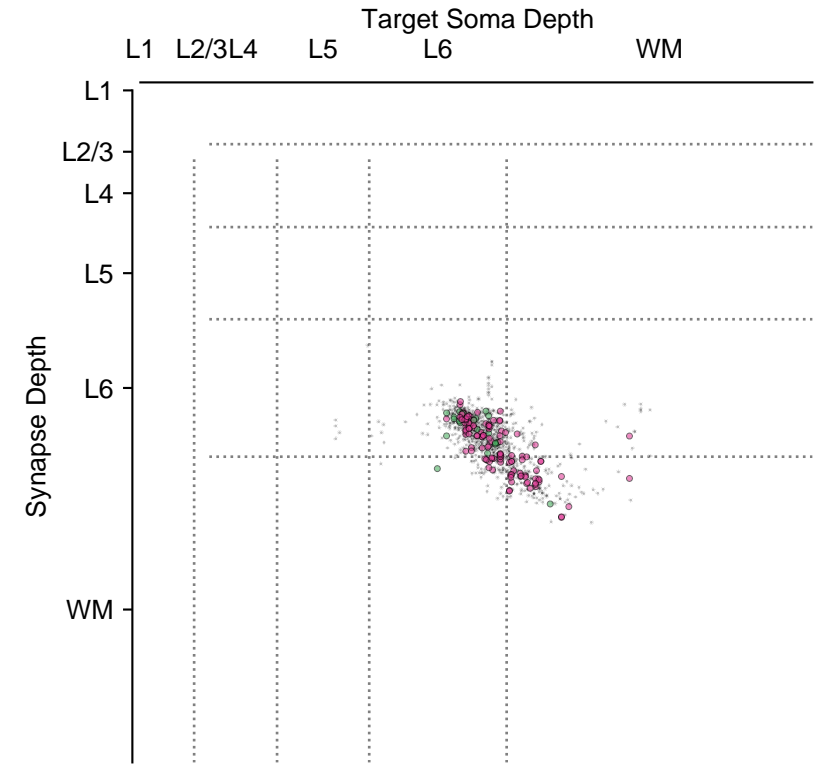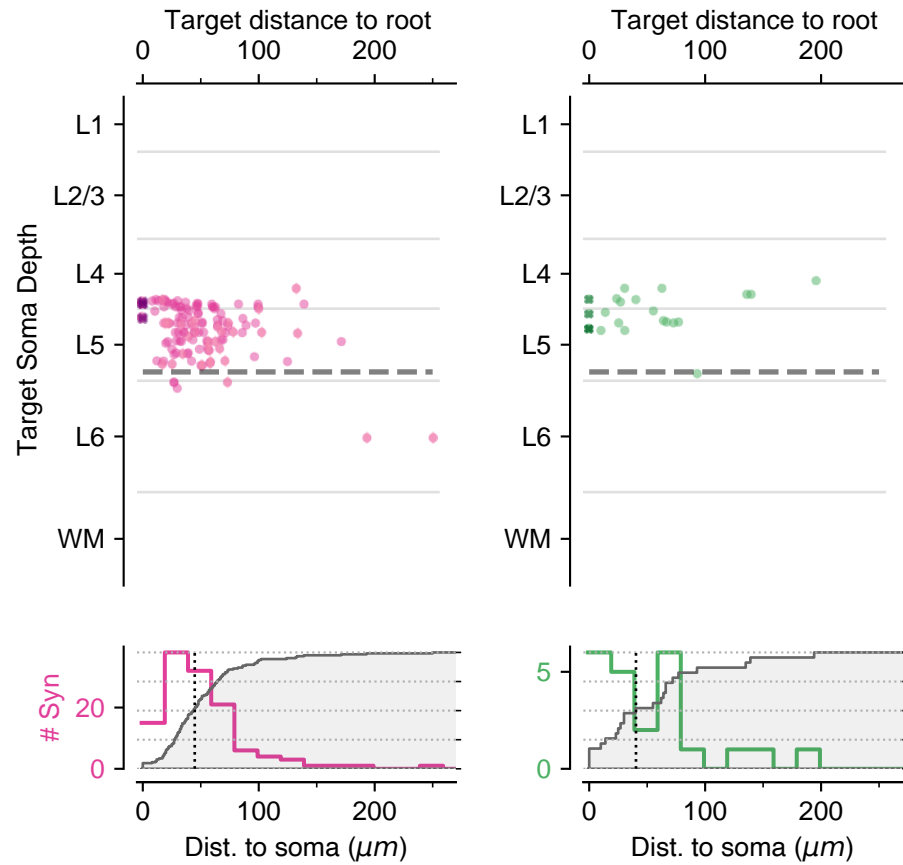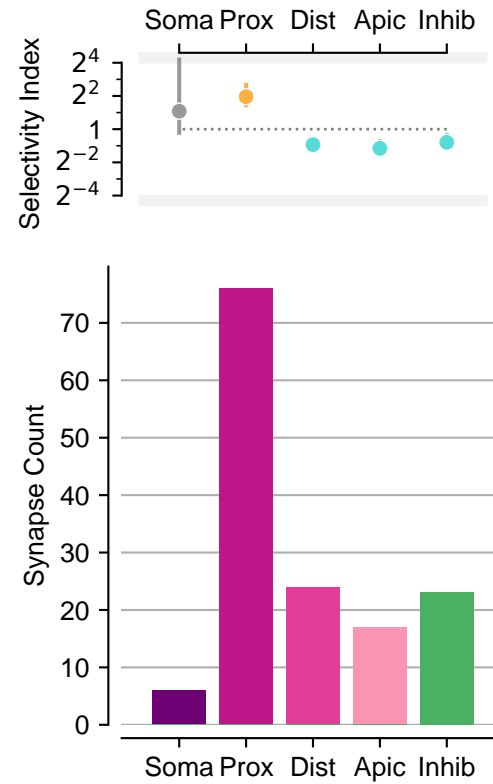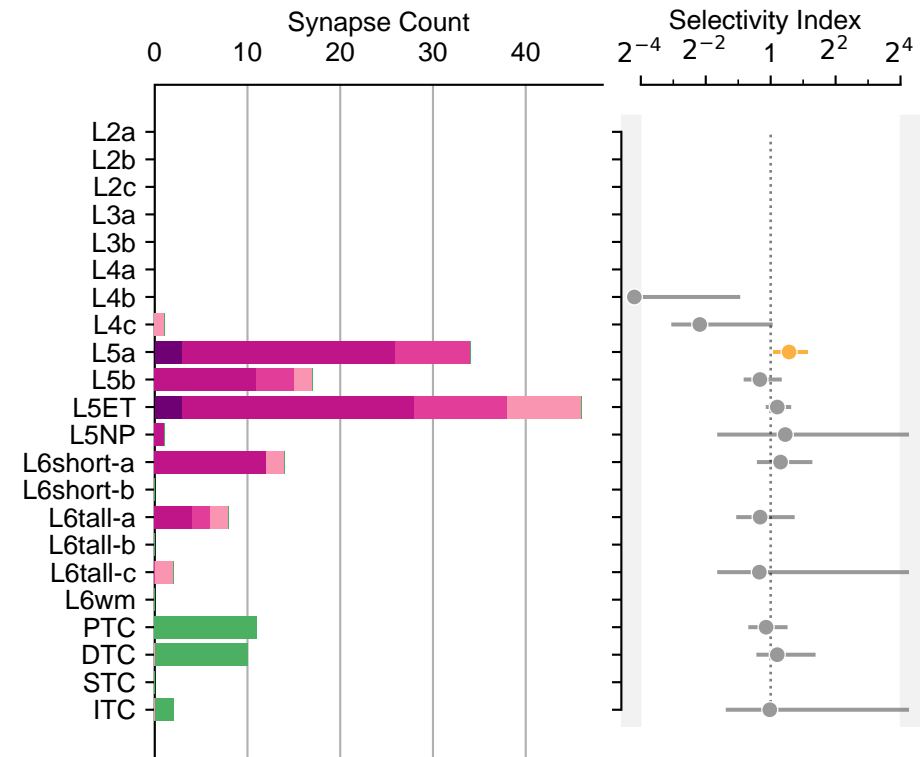

# Motif Group 11

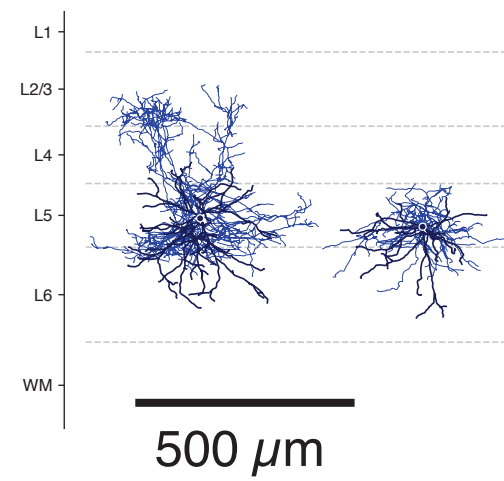

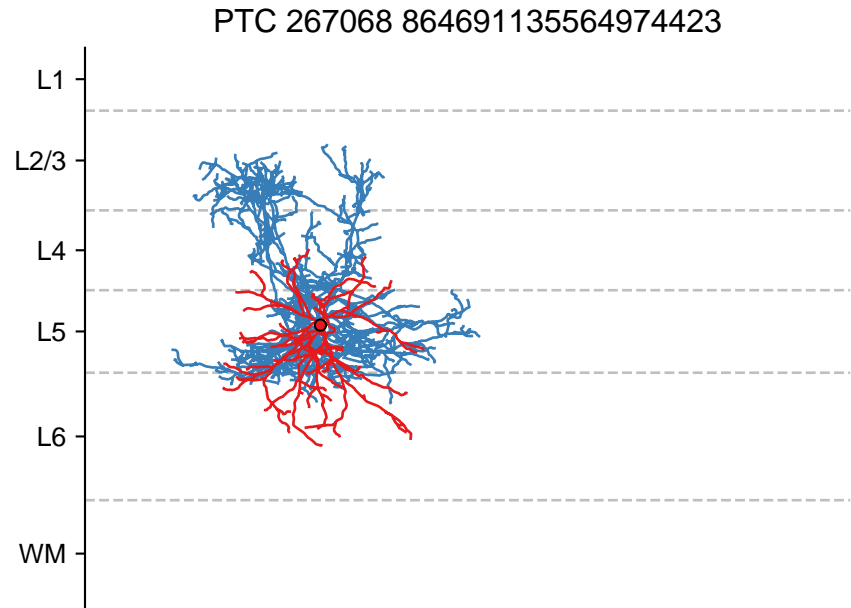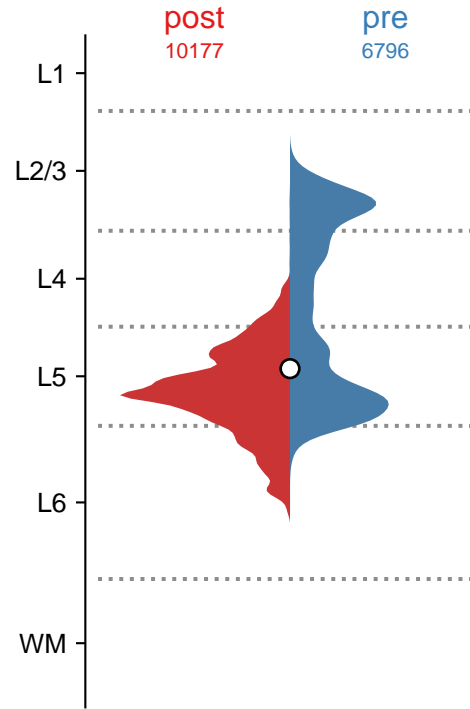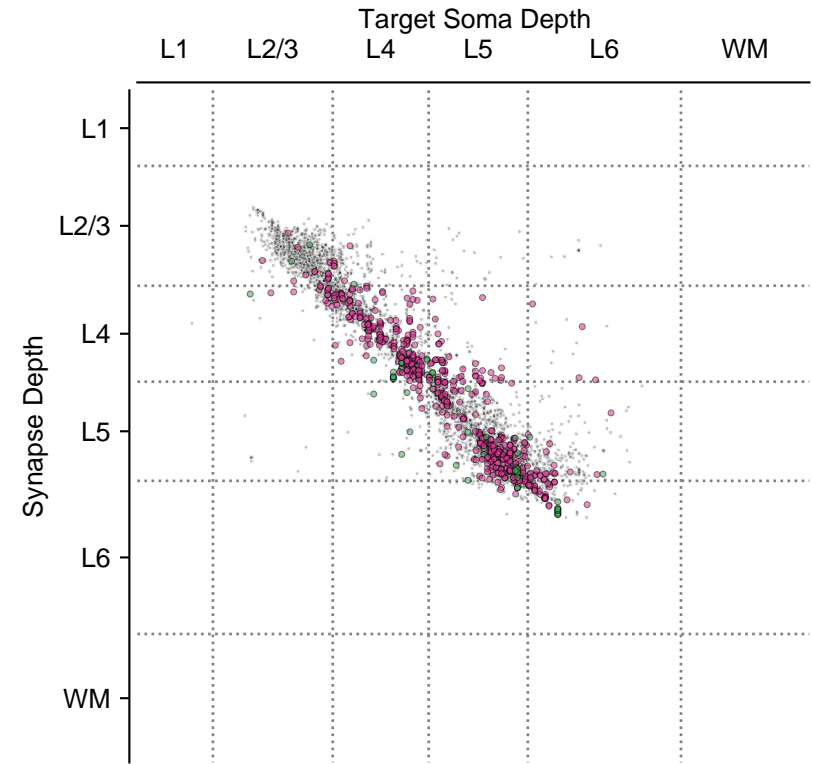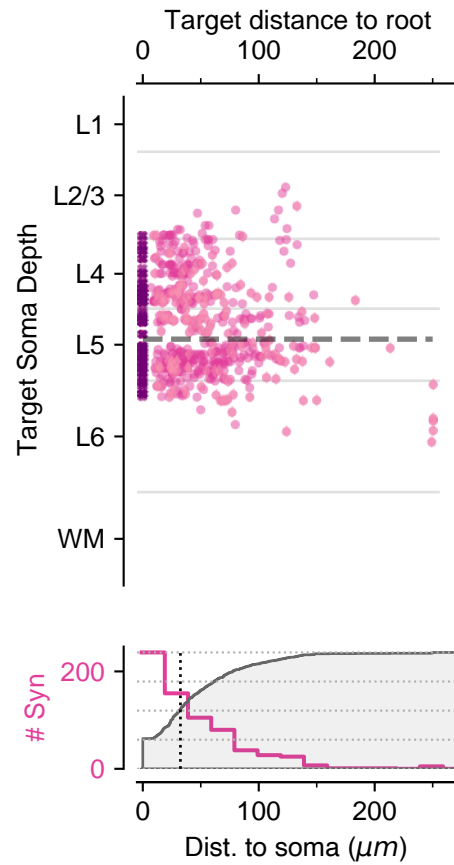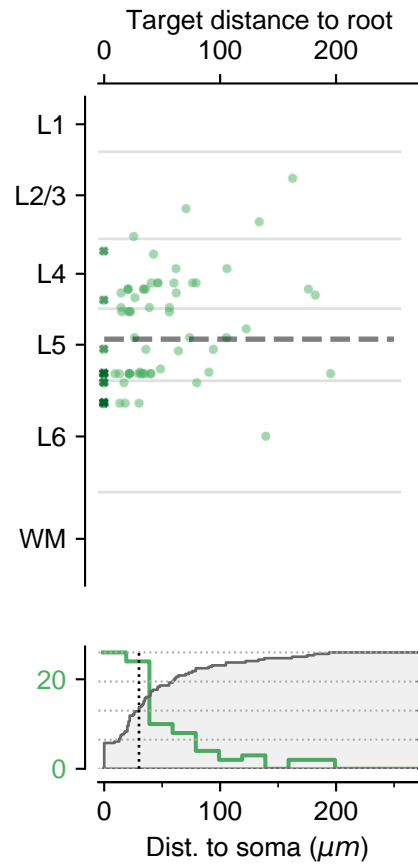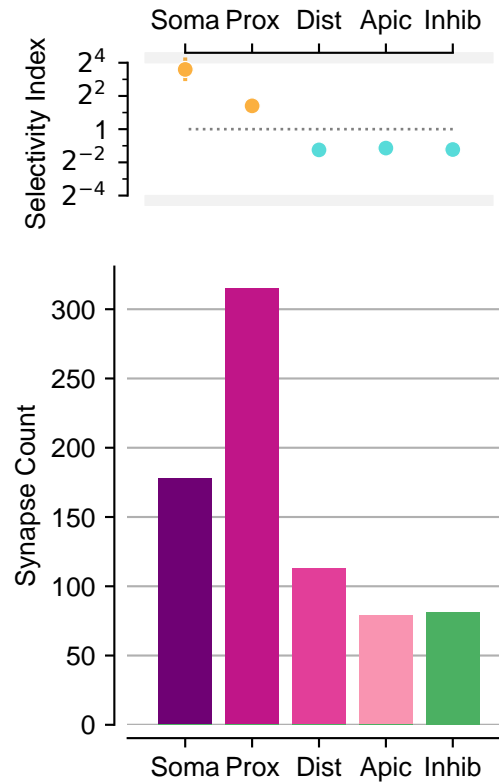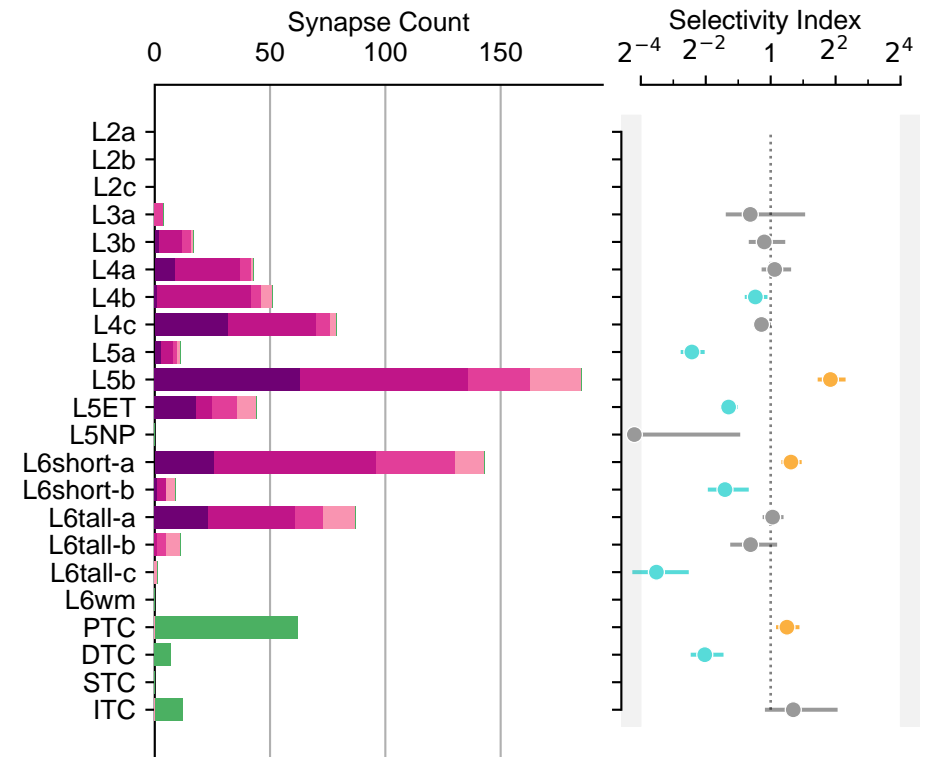



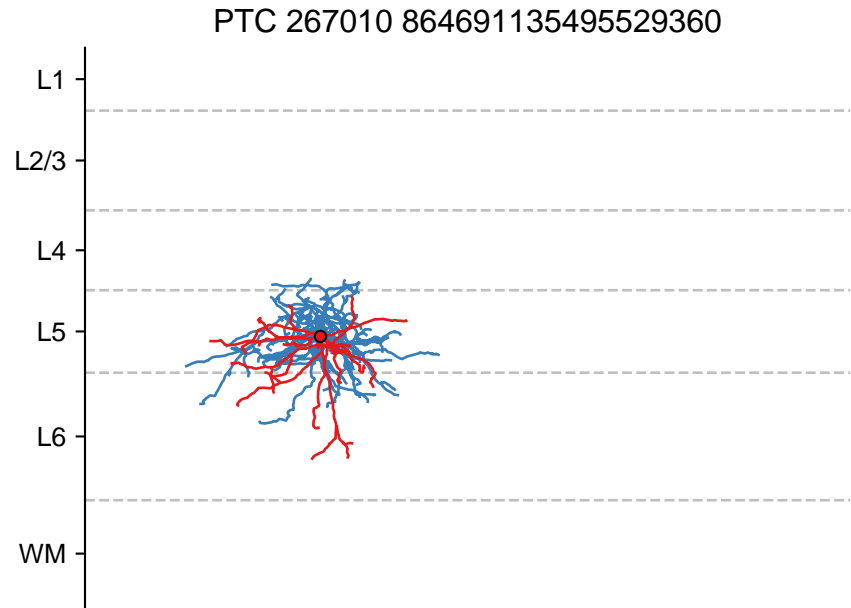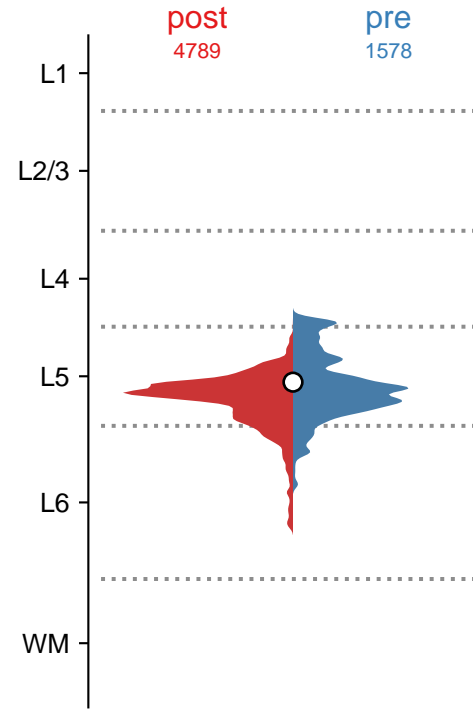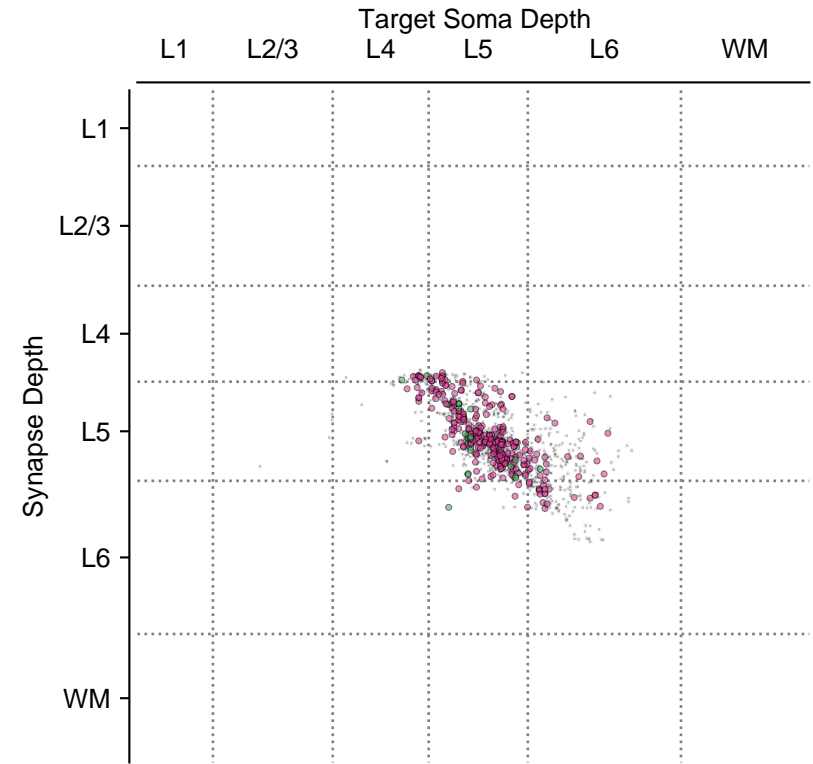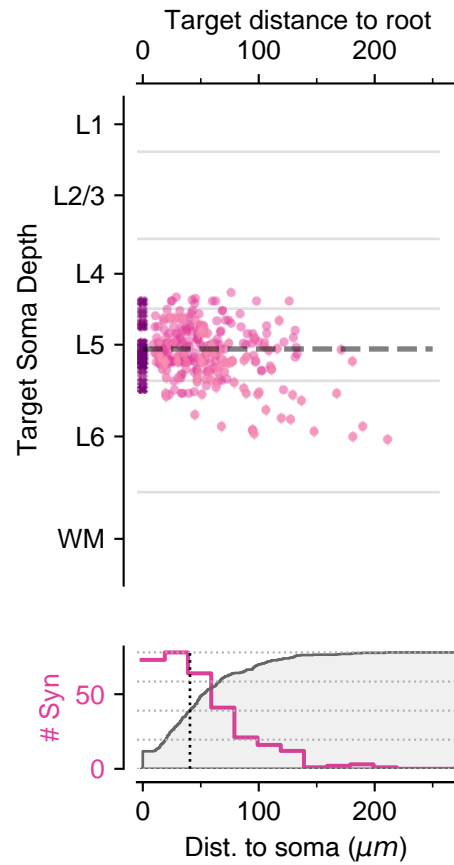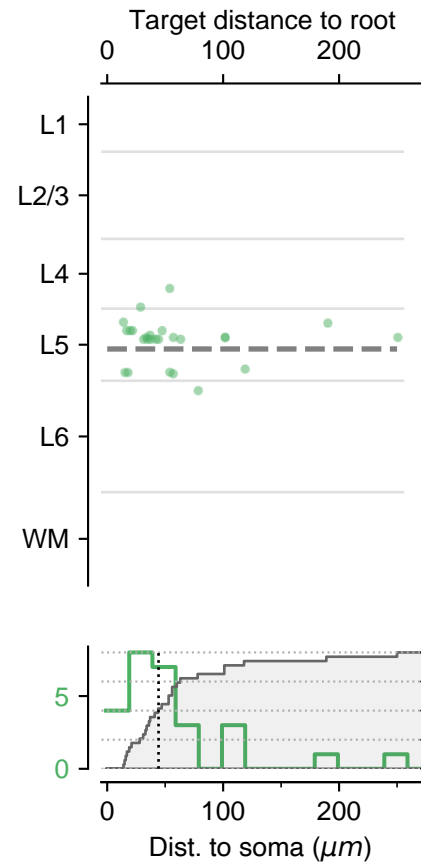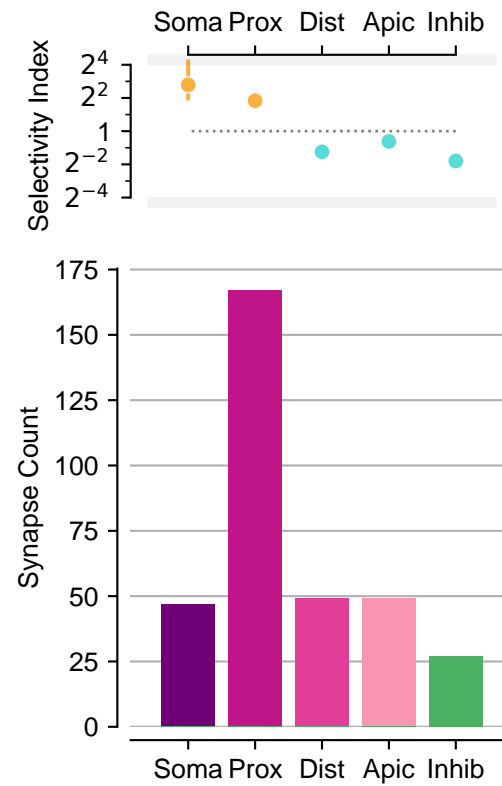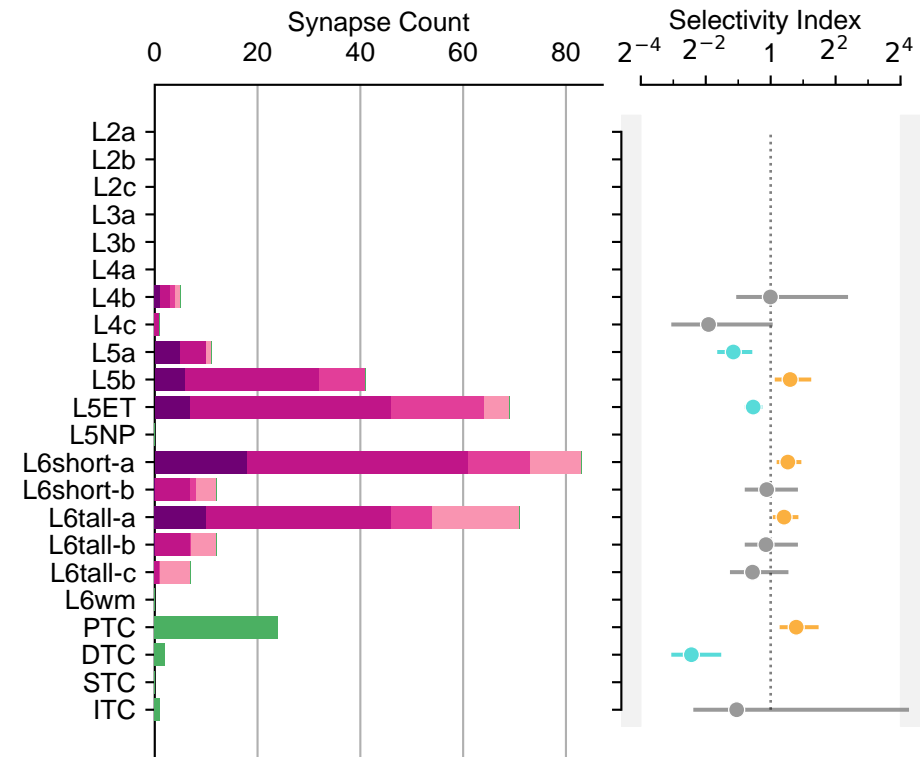

# Motif Group 12

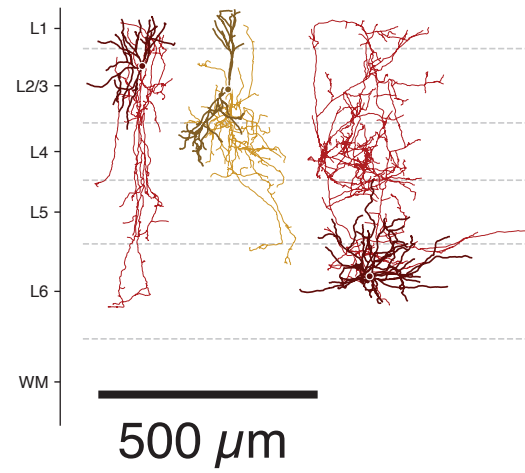

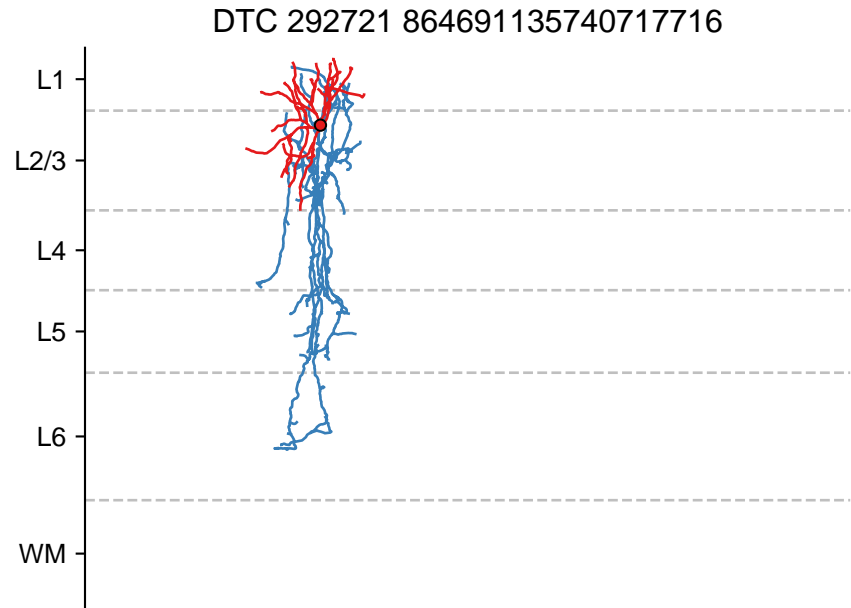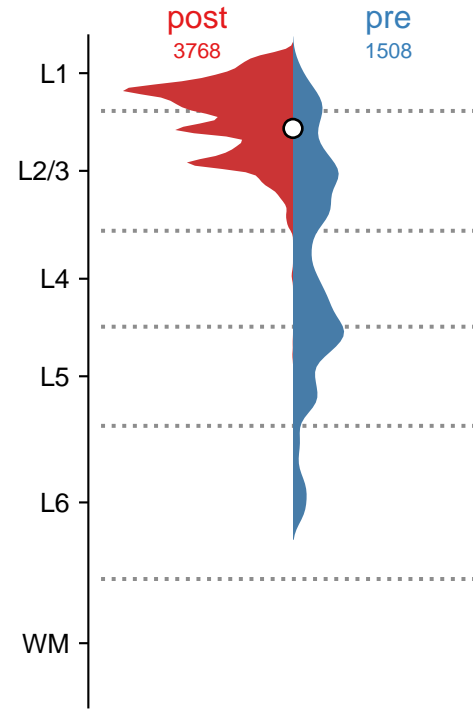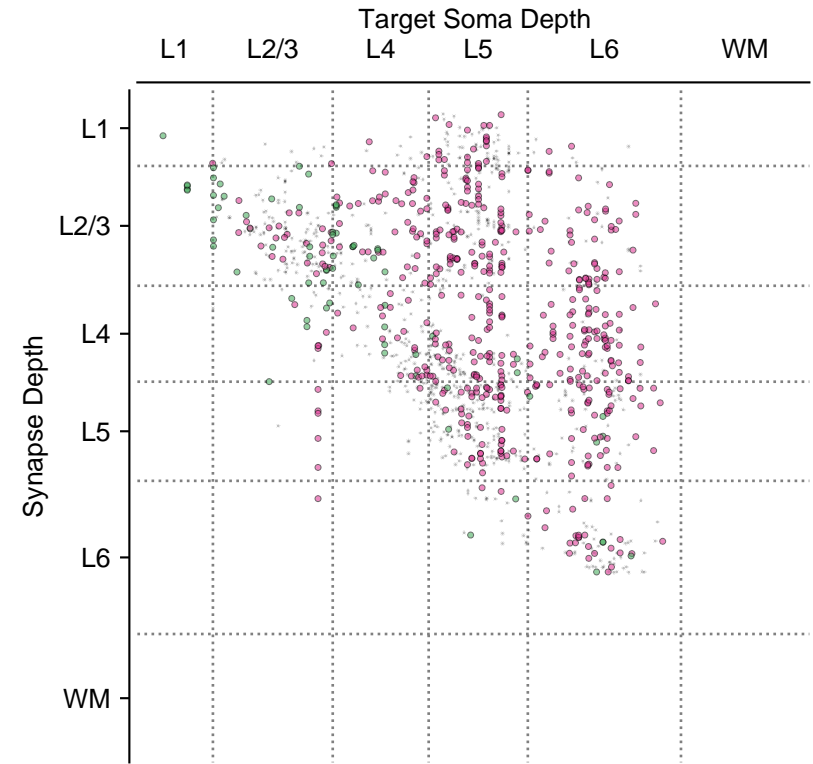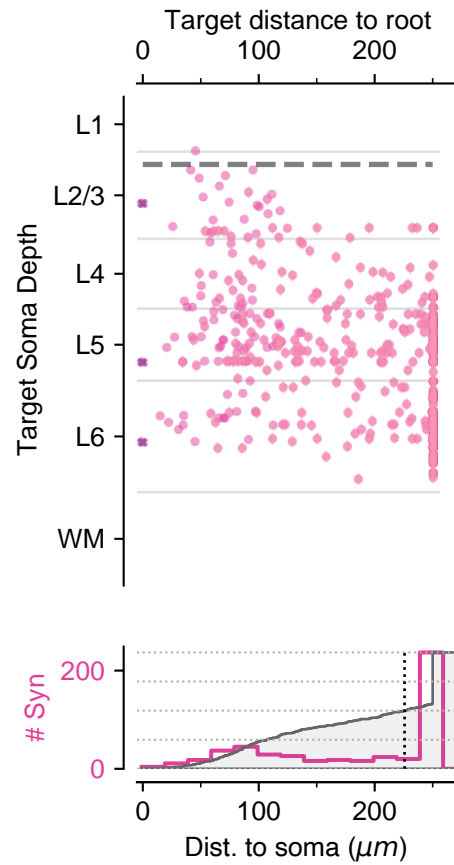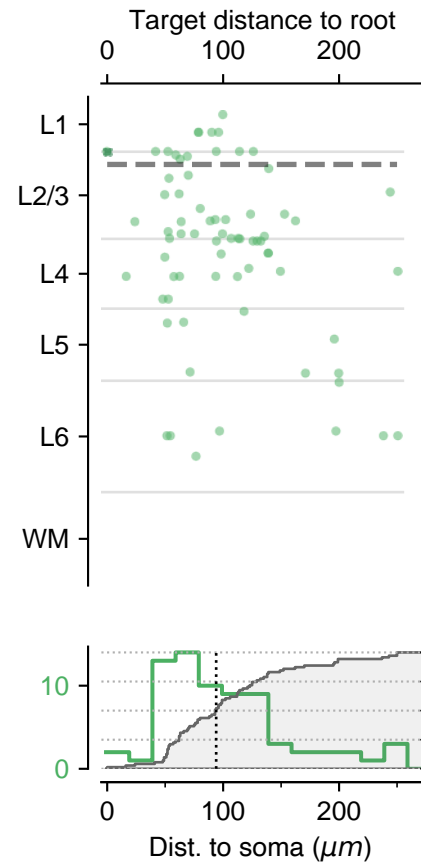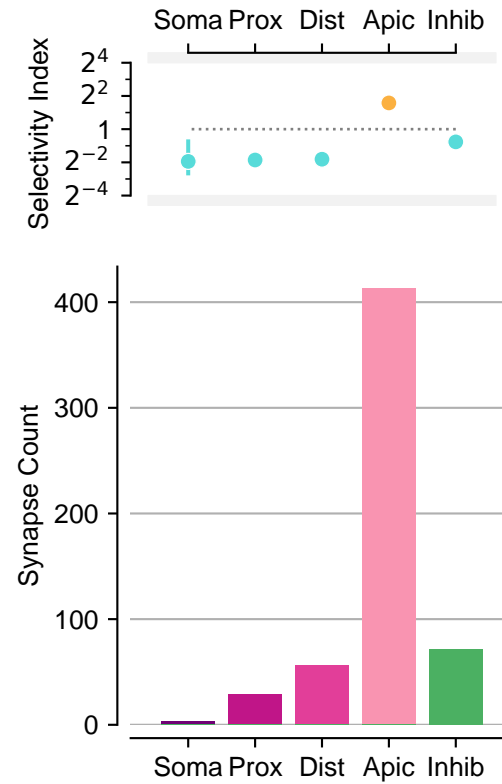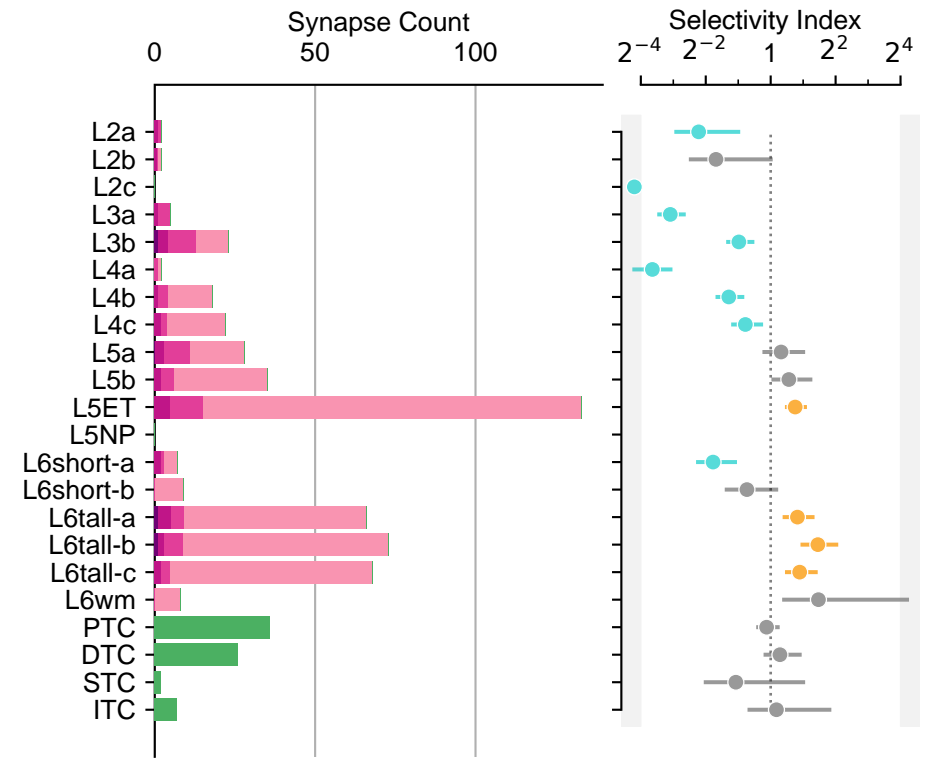

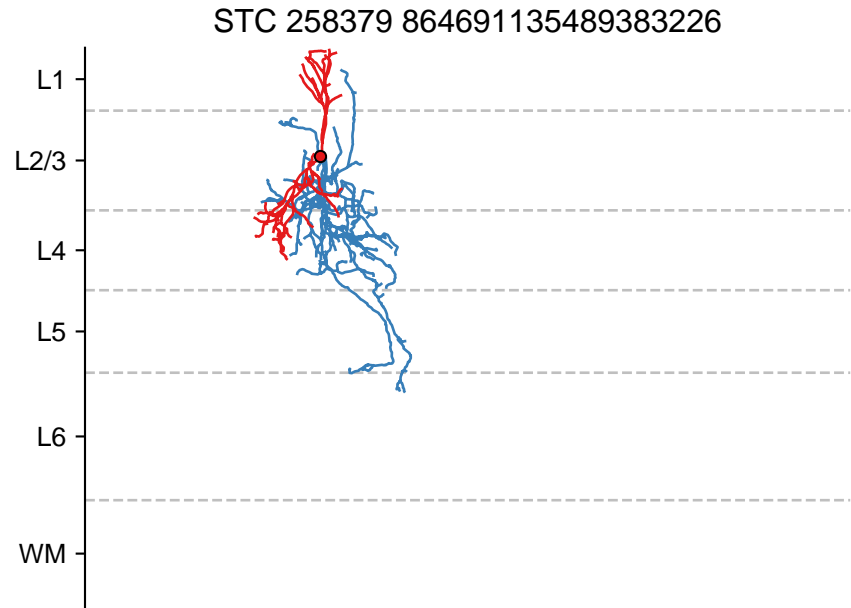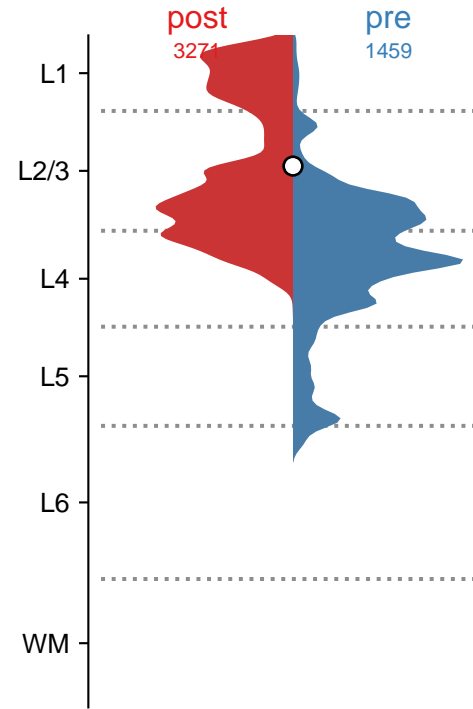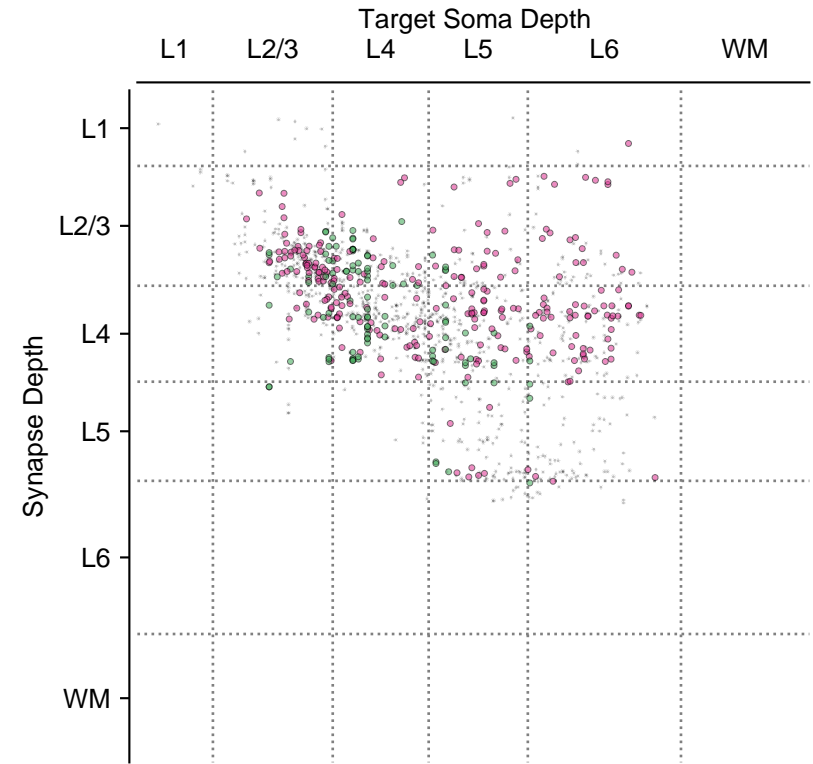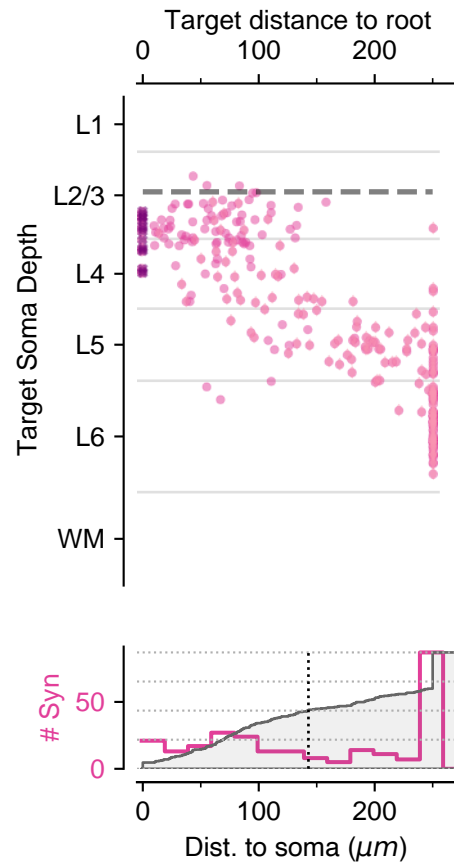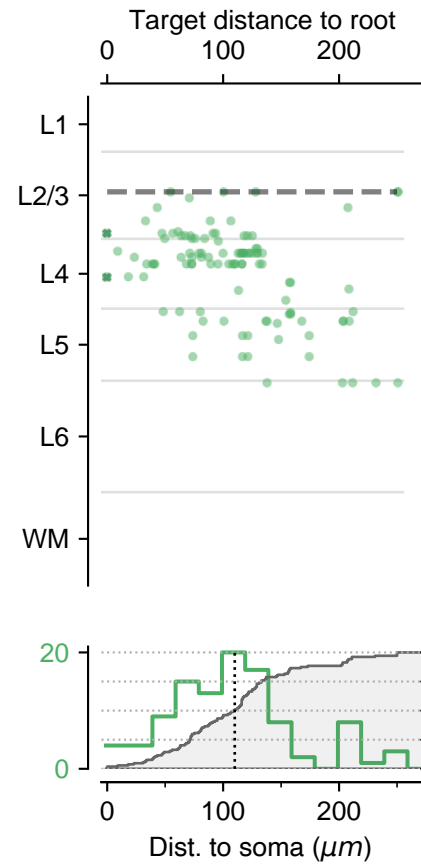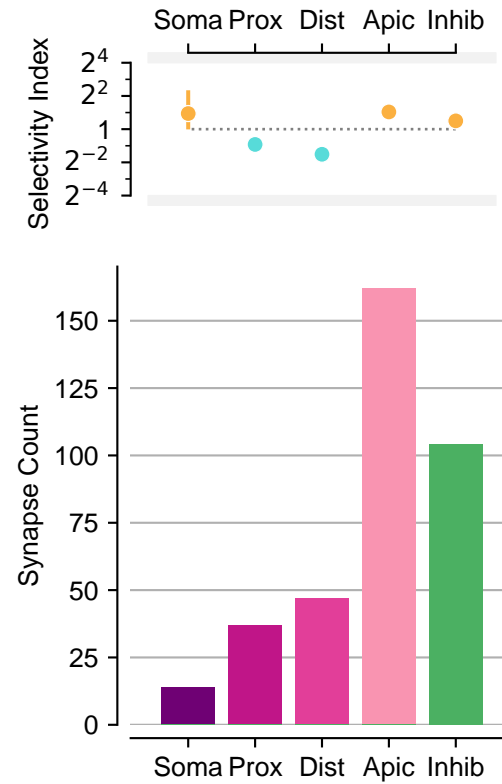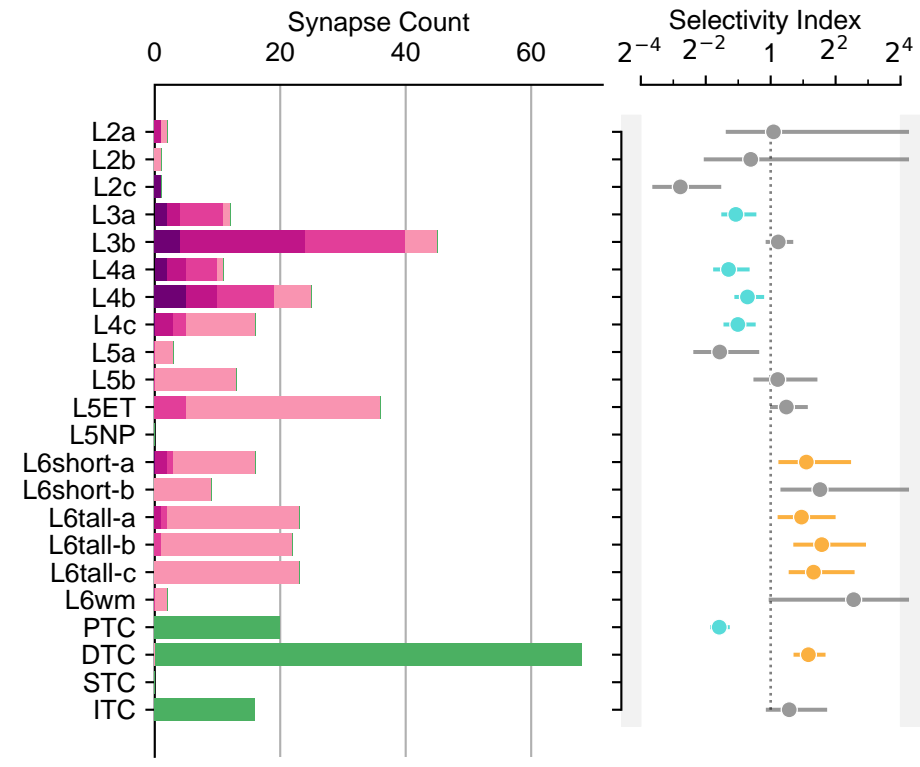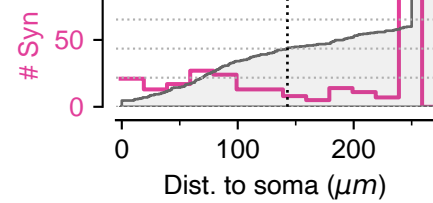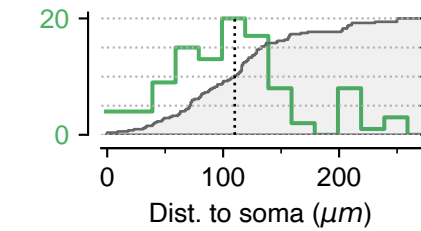

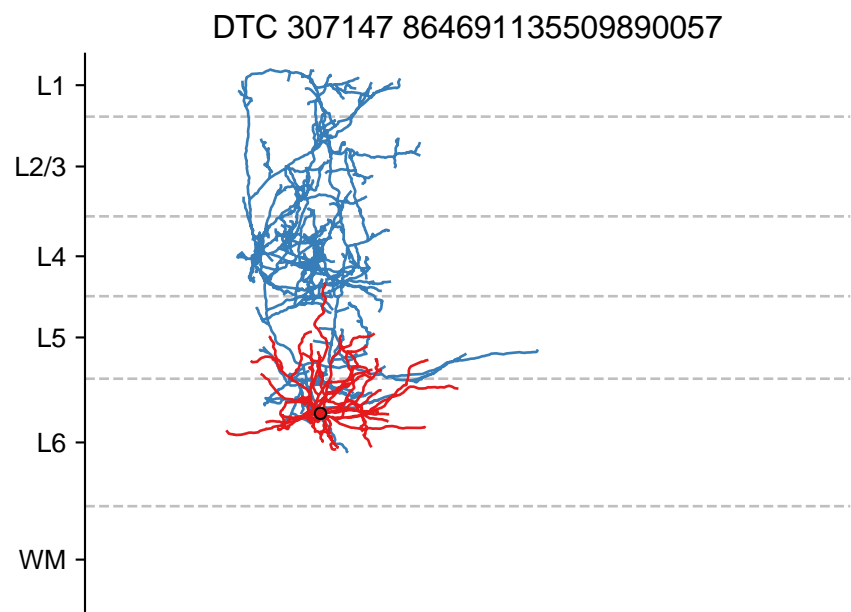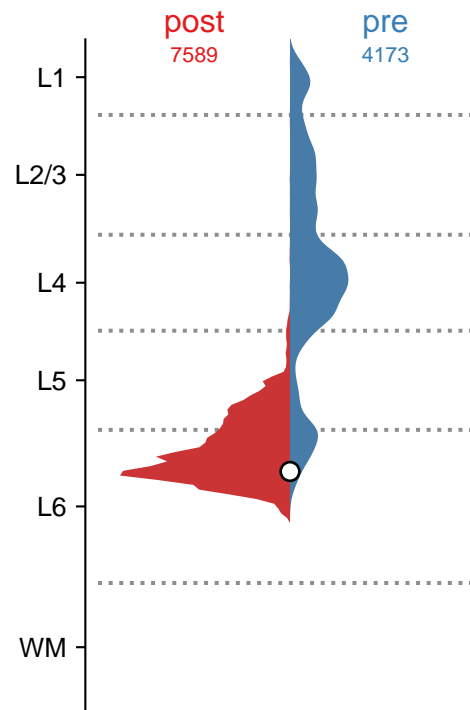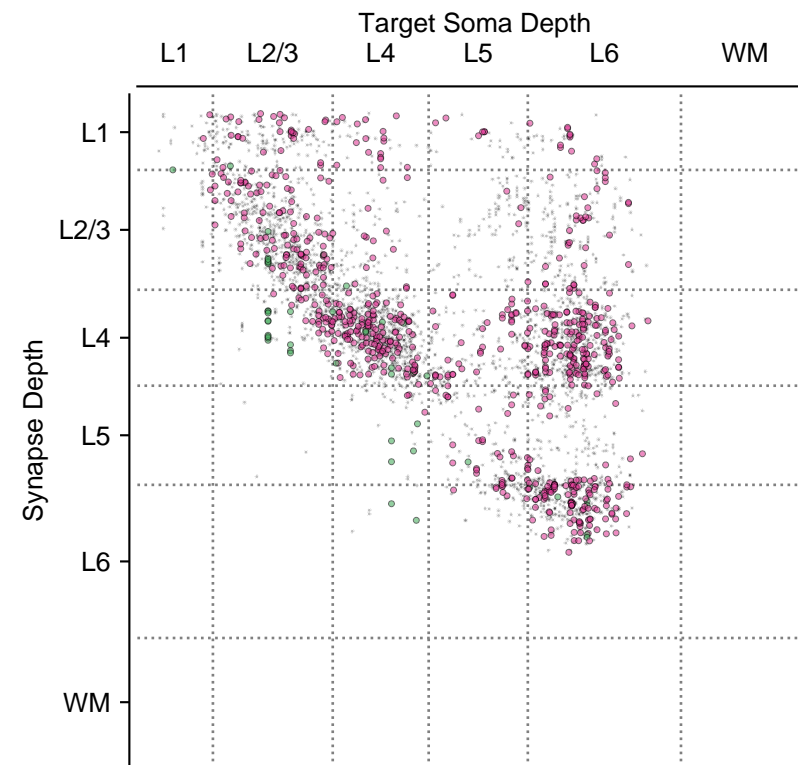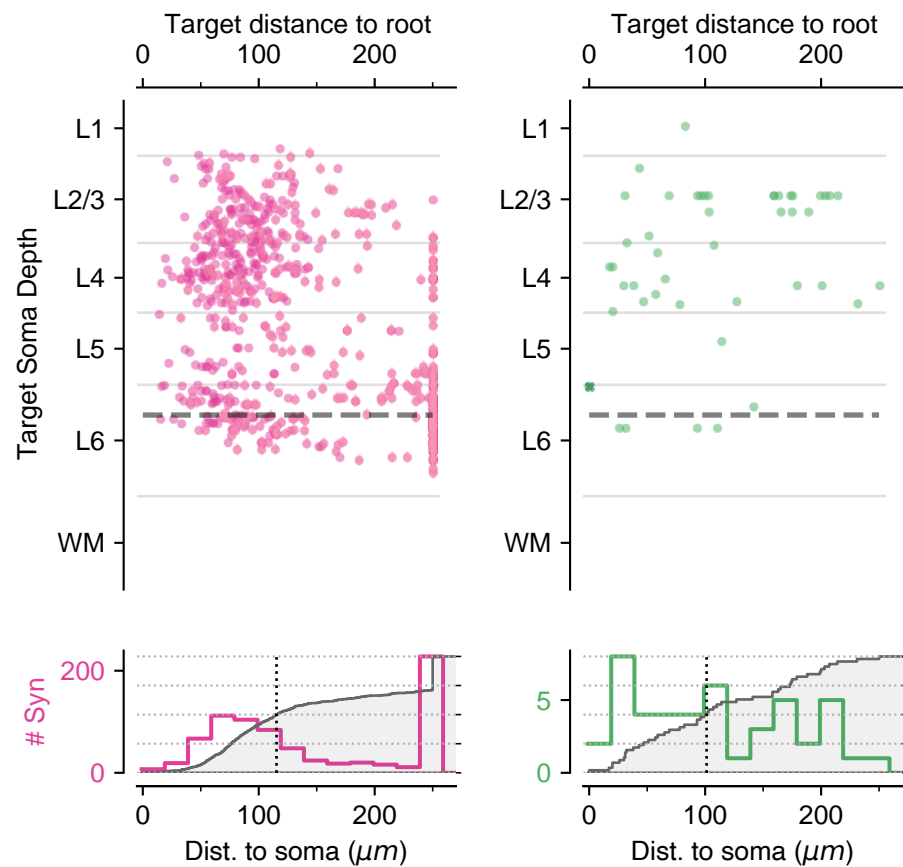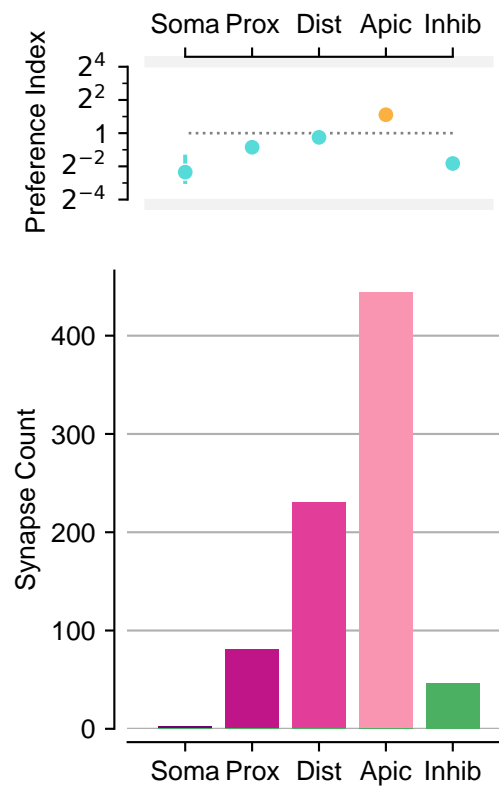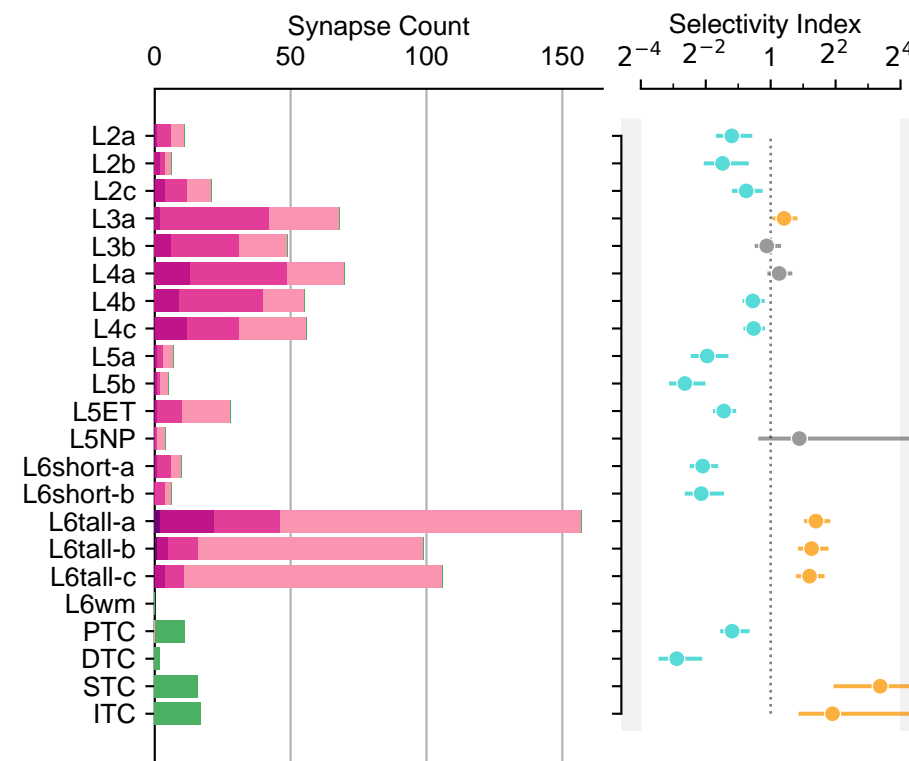

# Motif Group 13

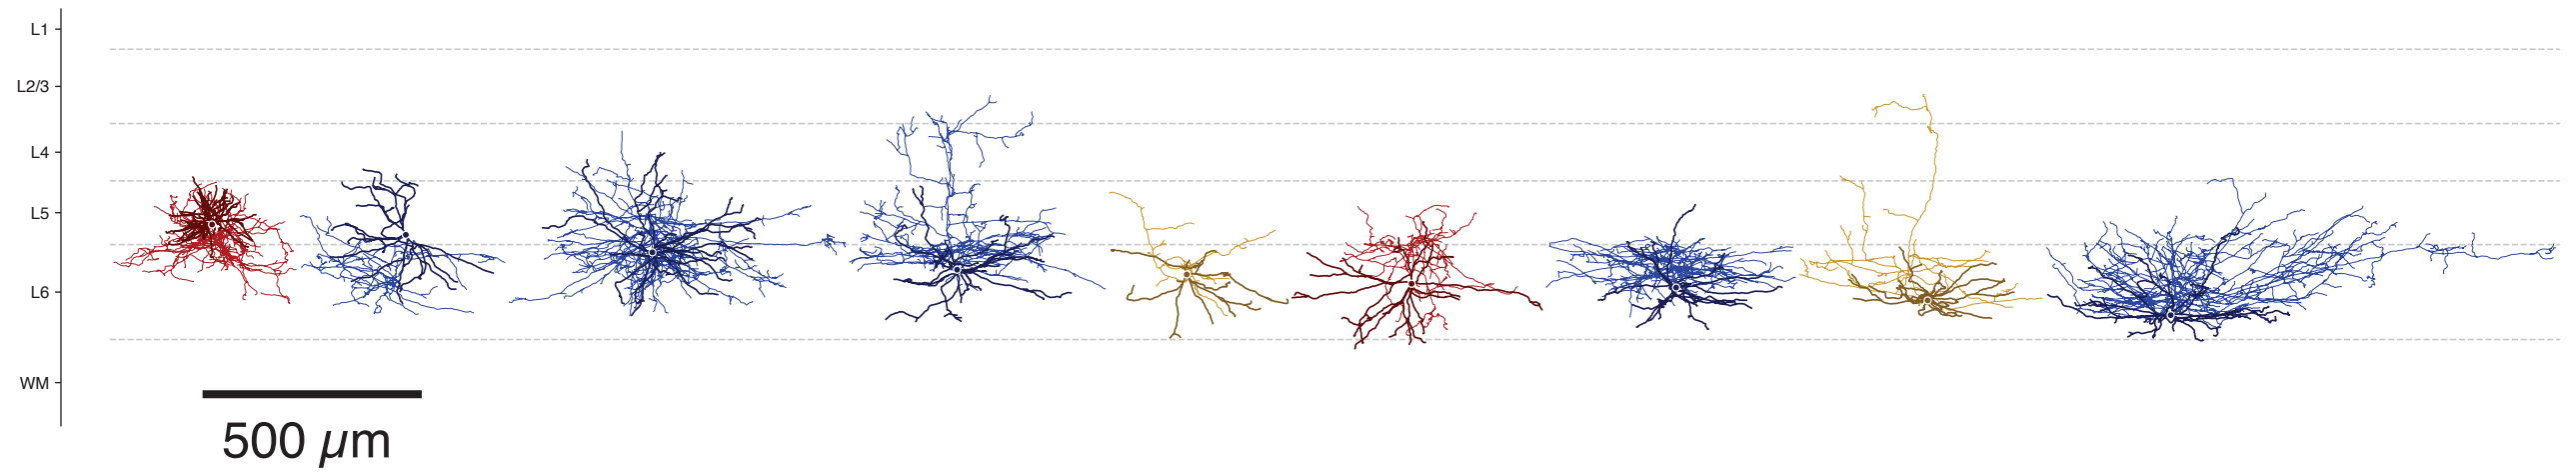

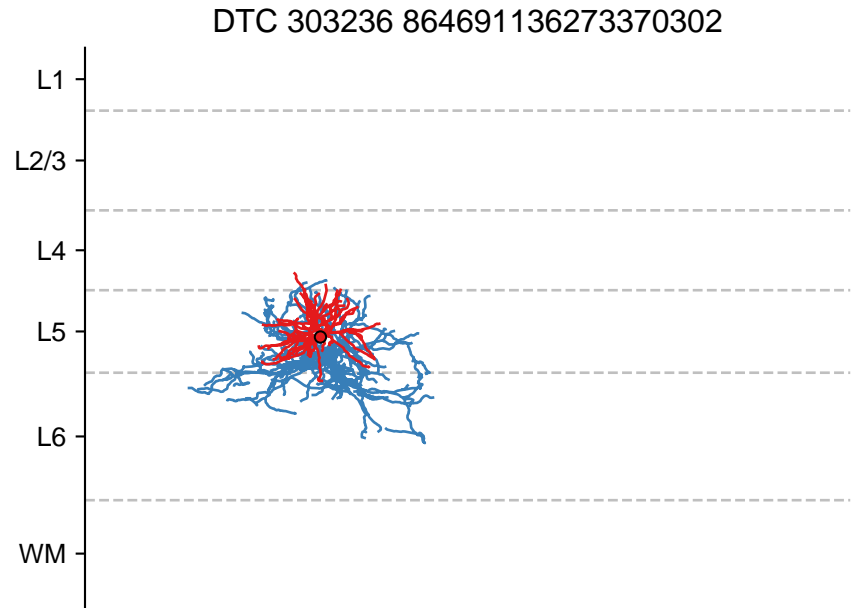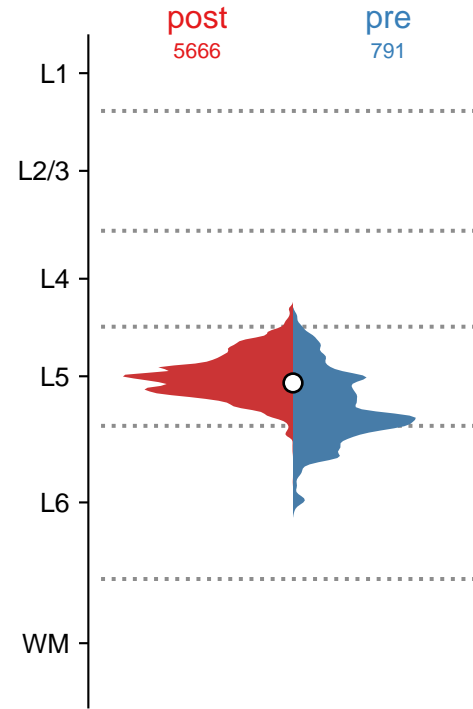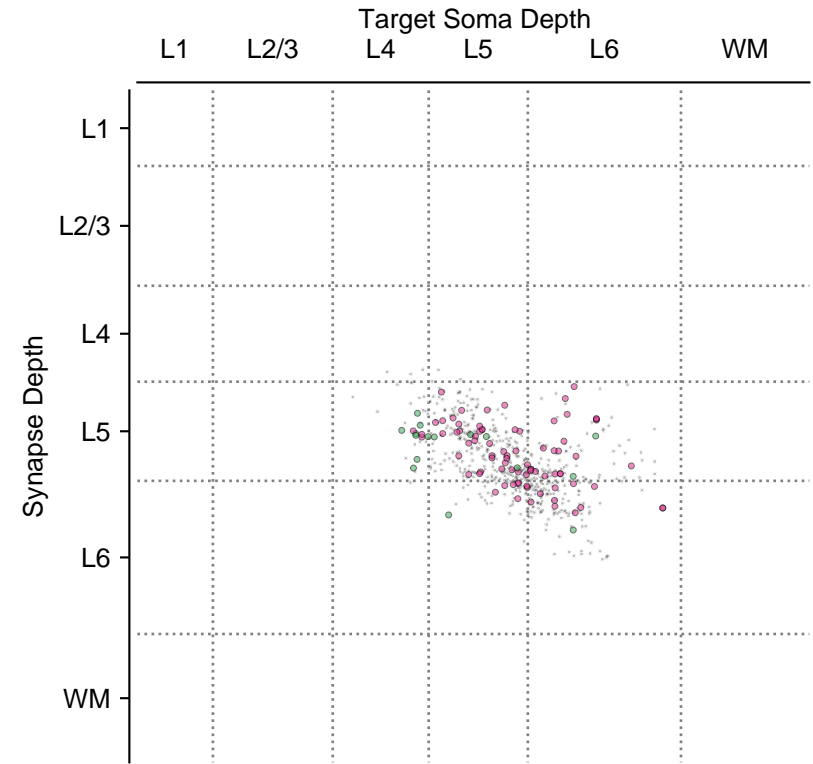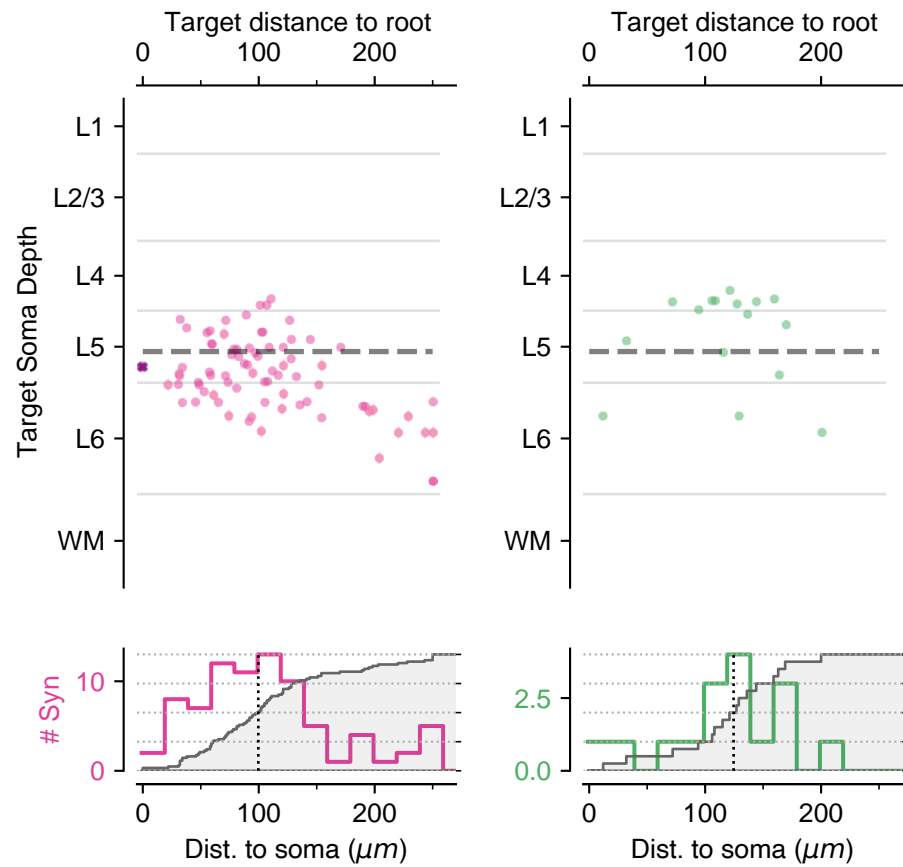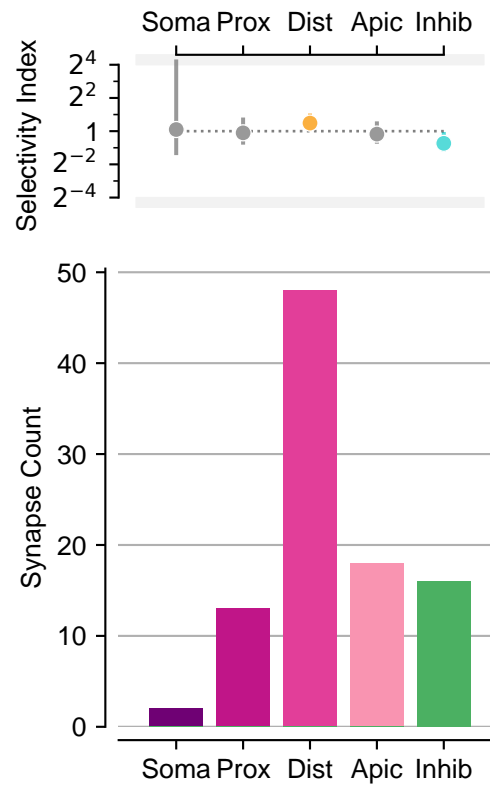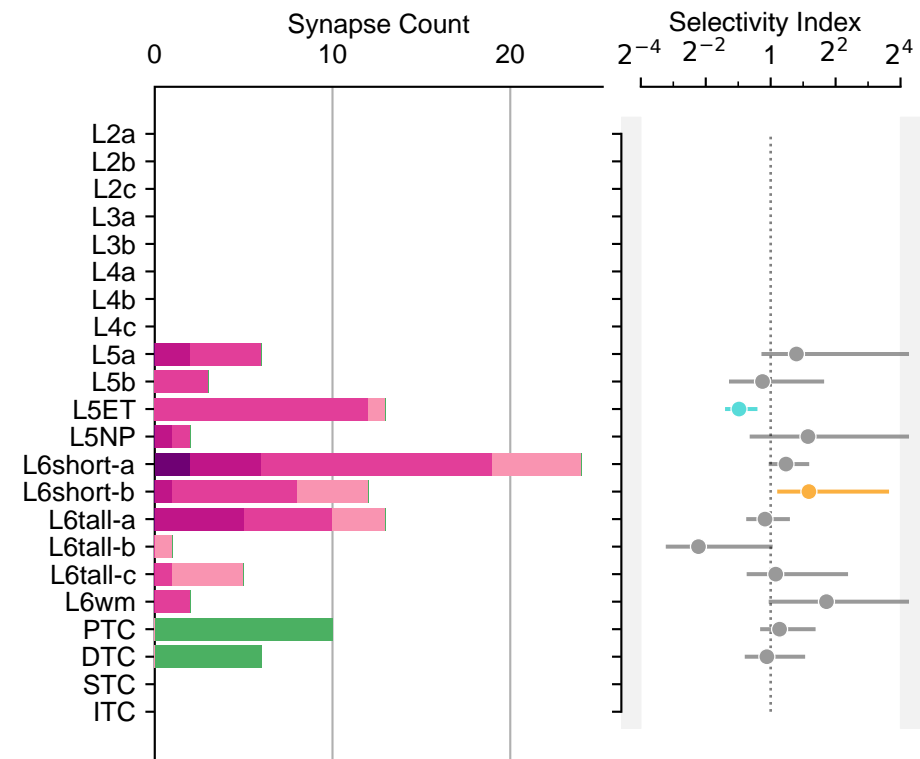

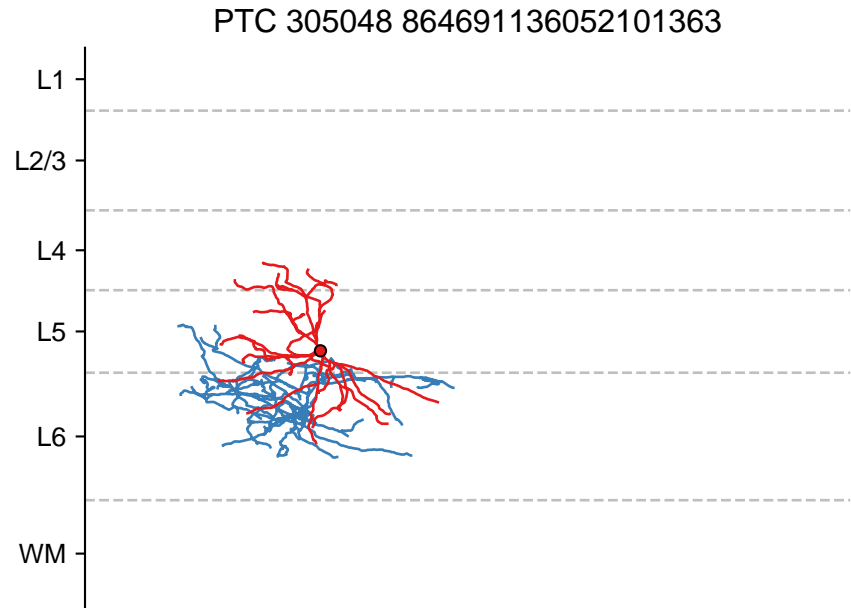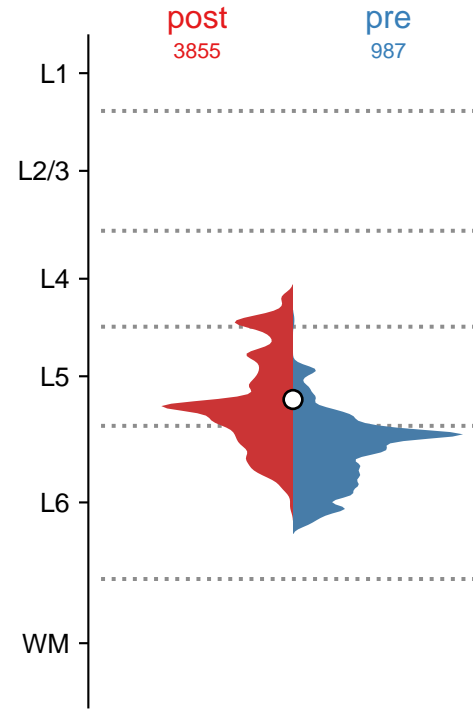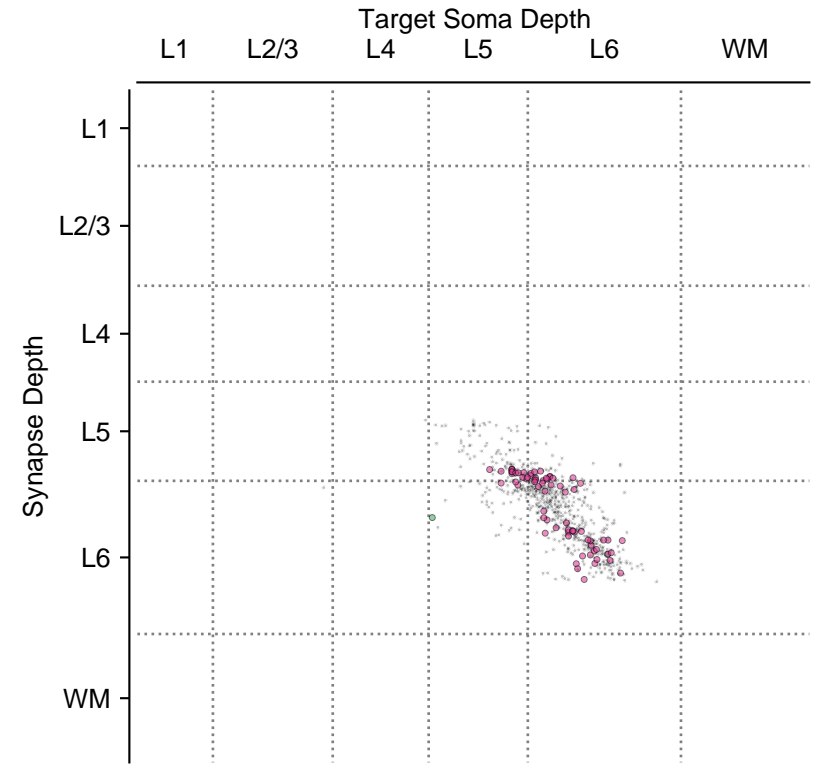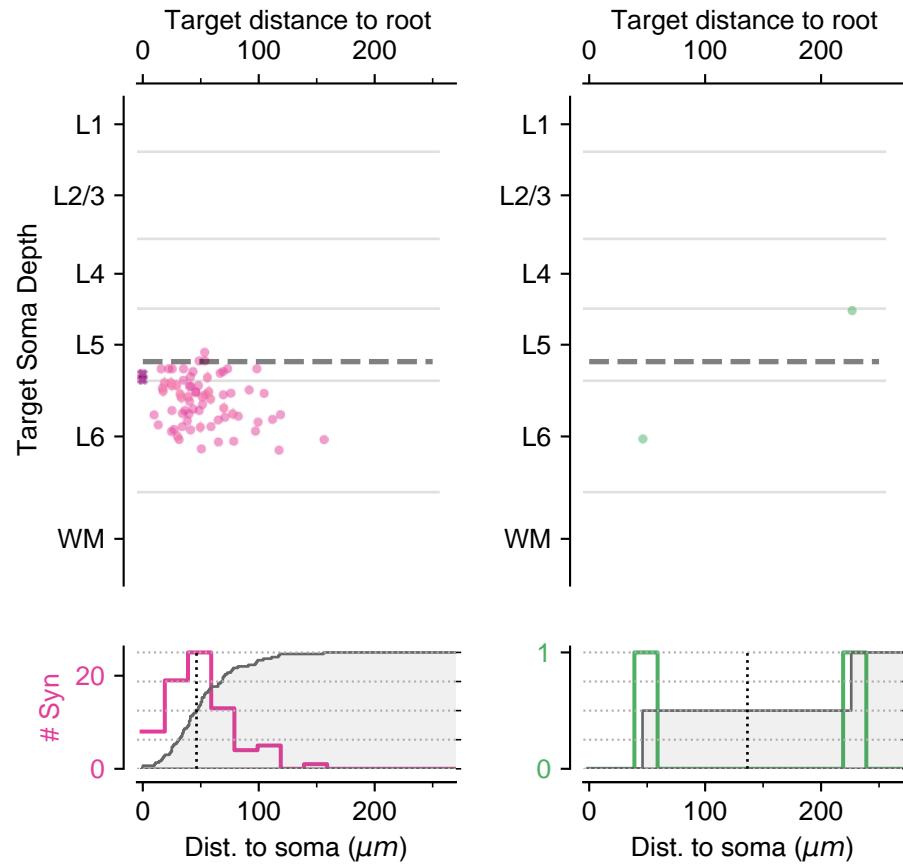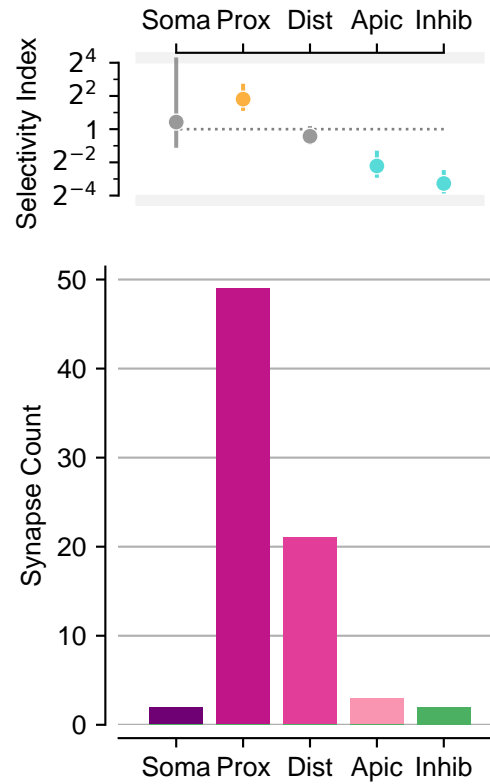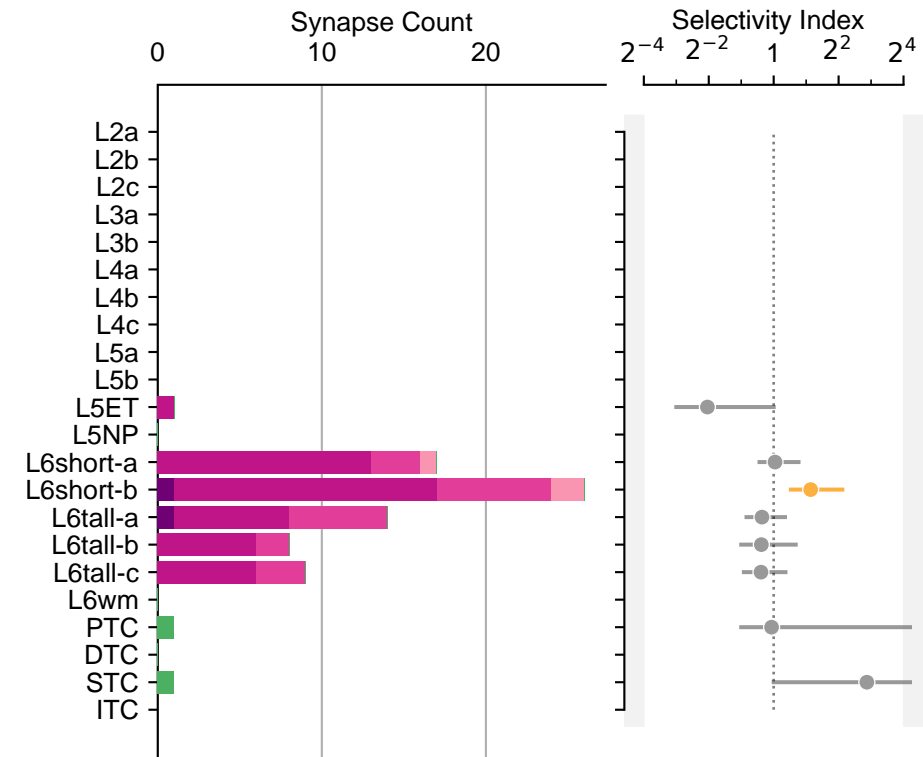



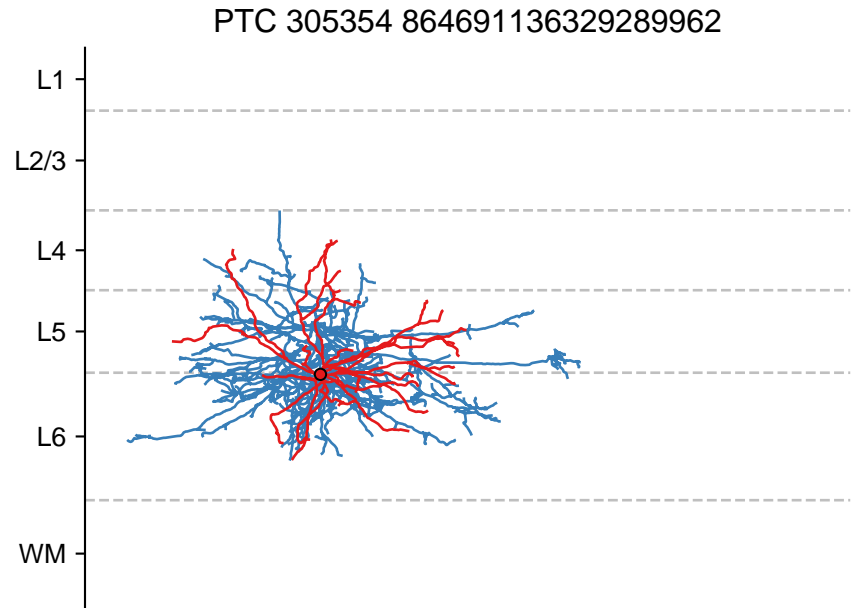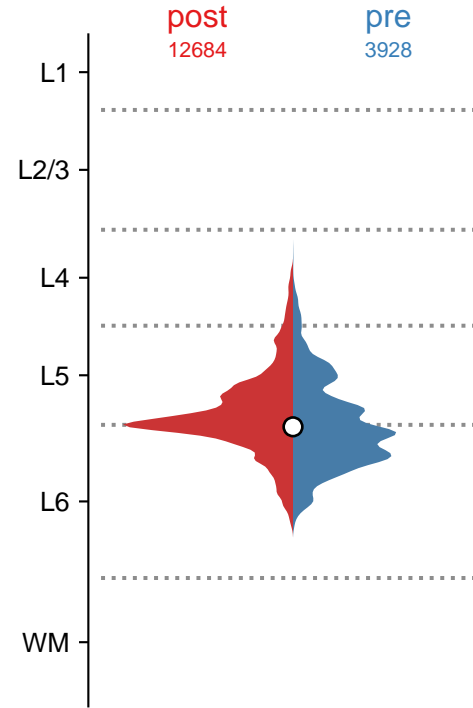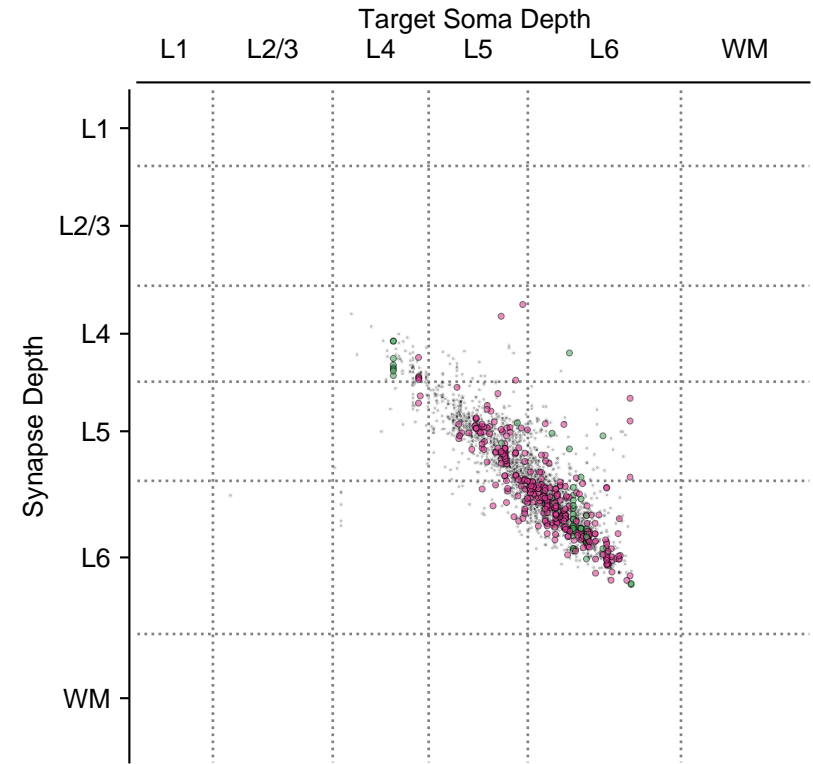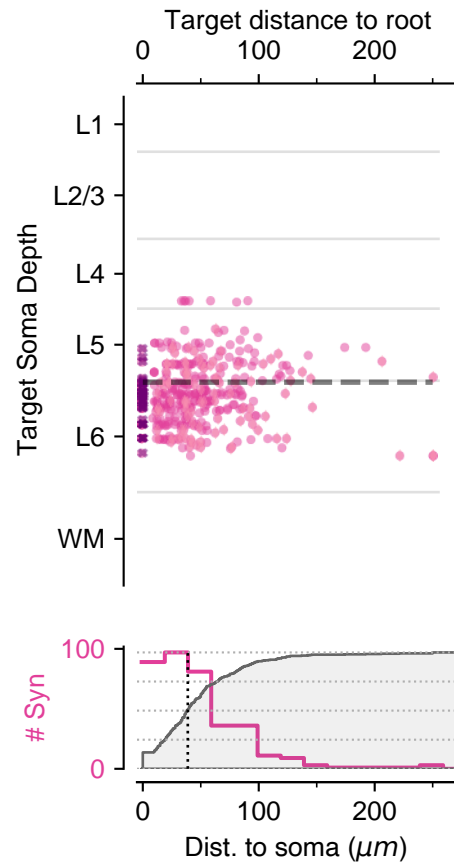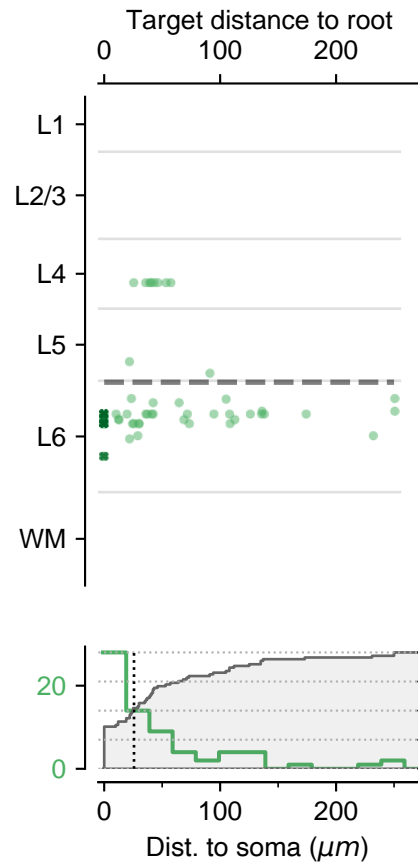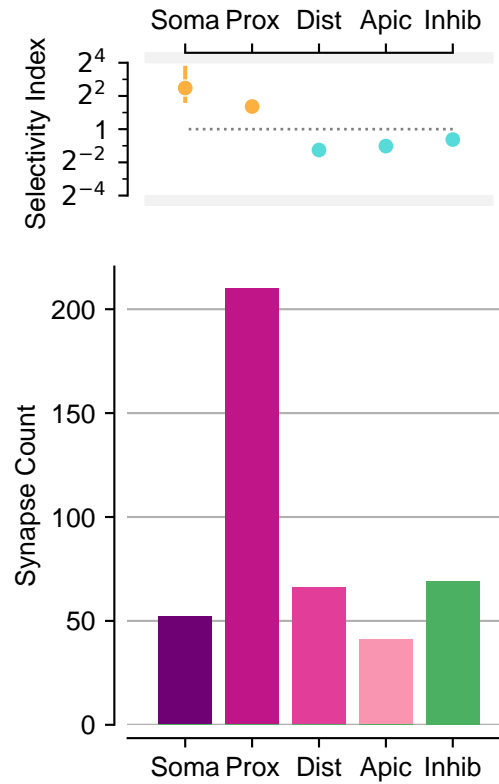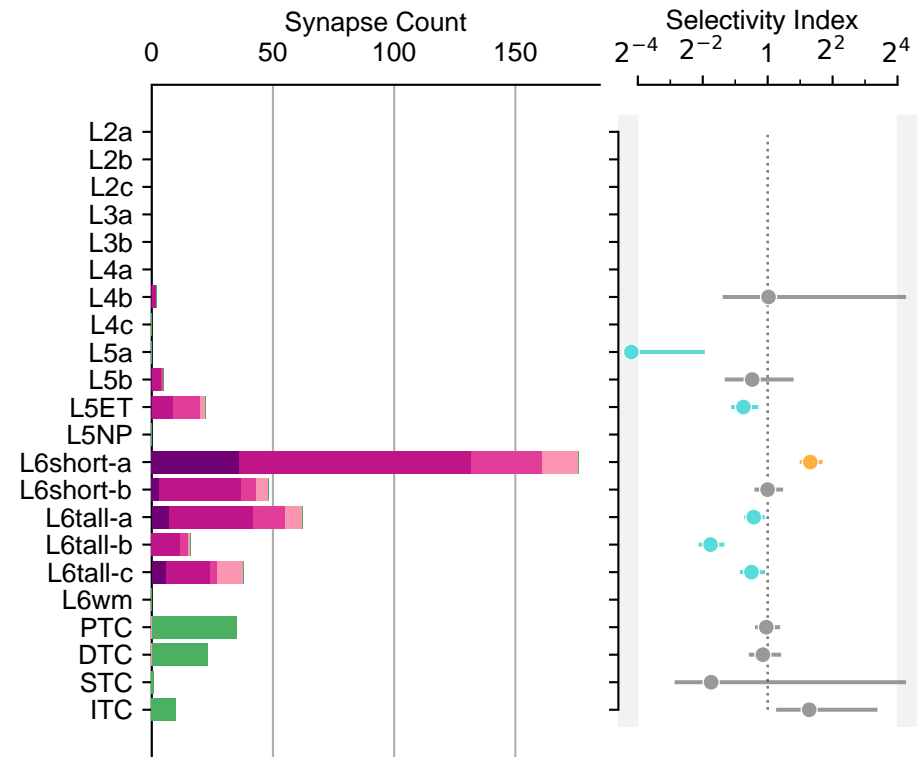

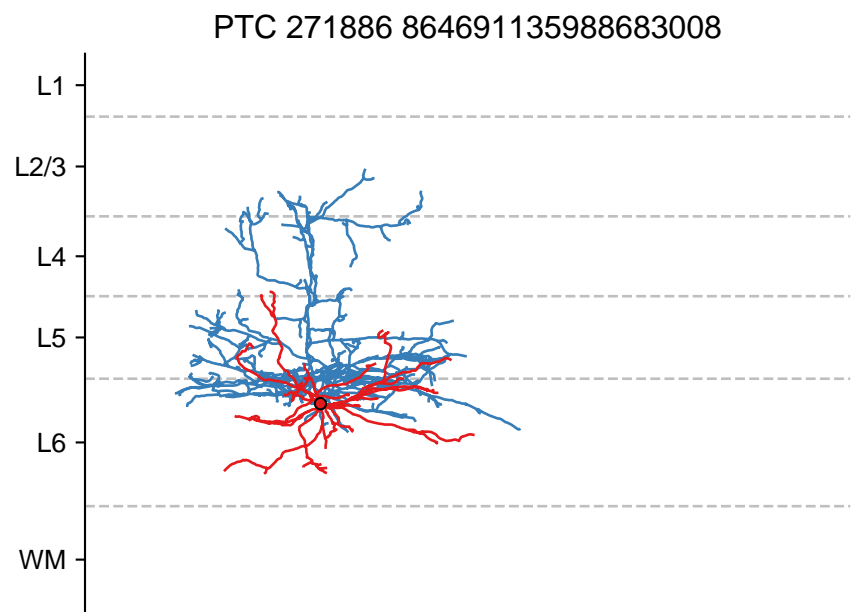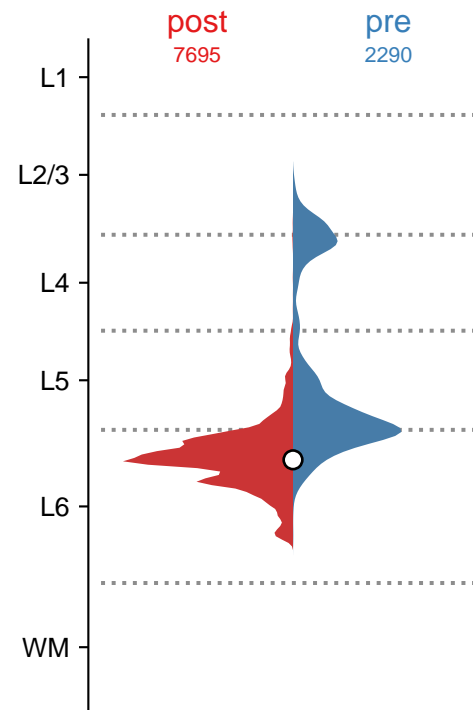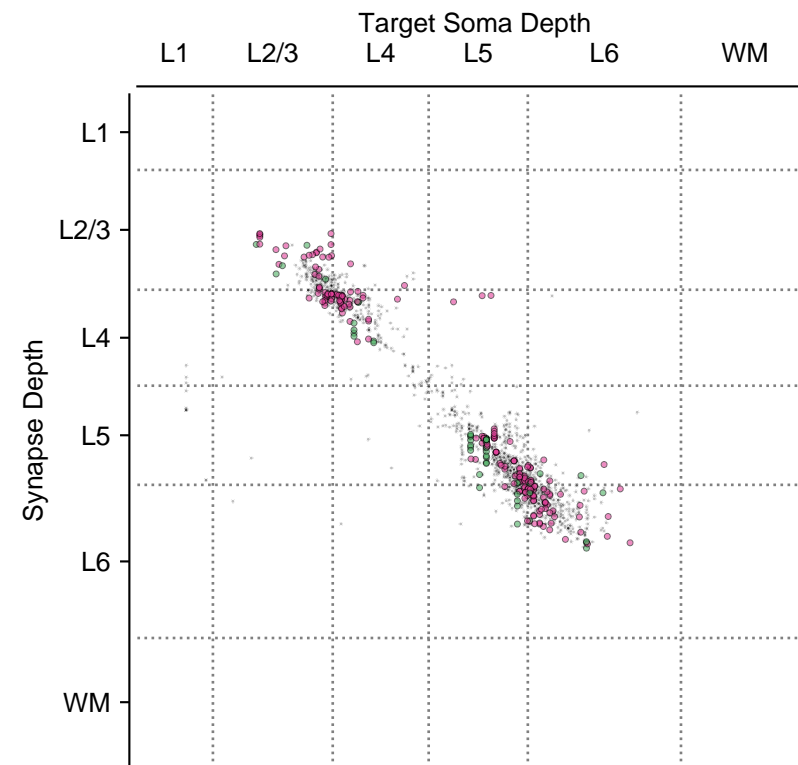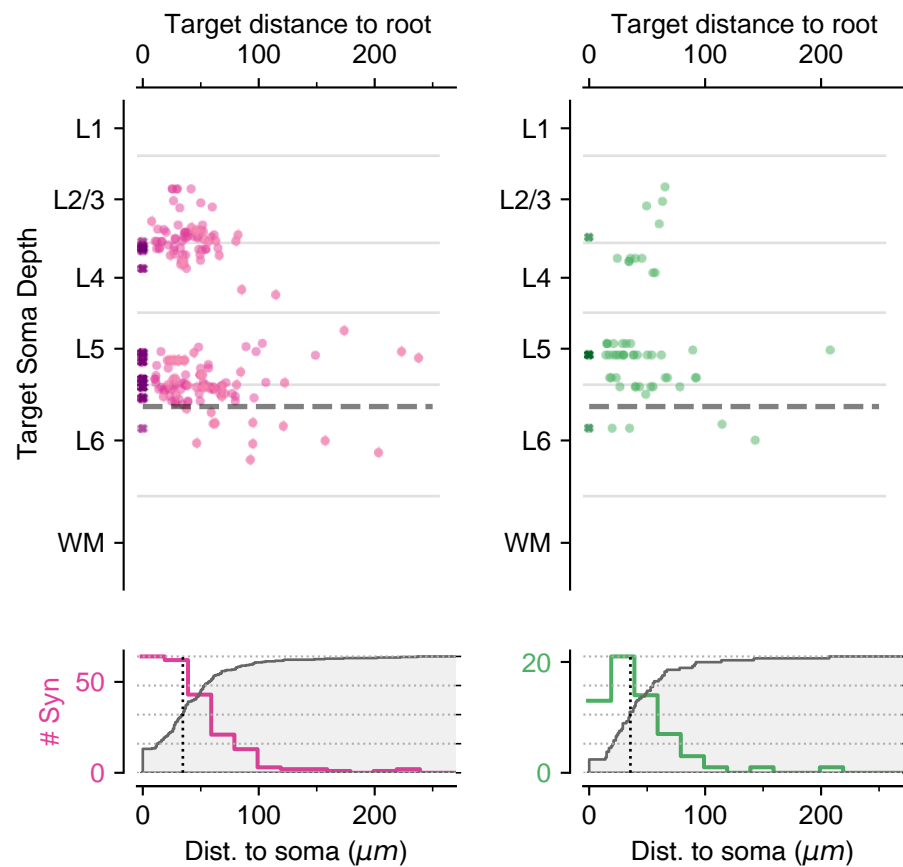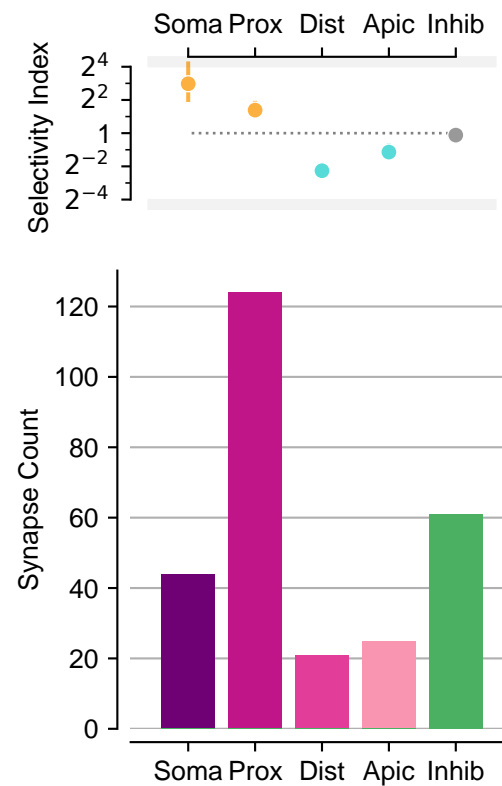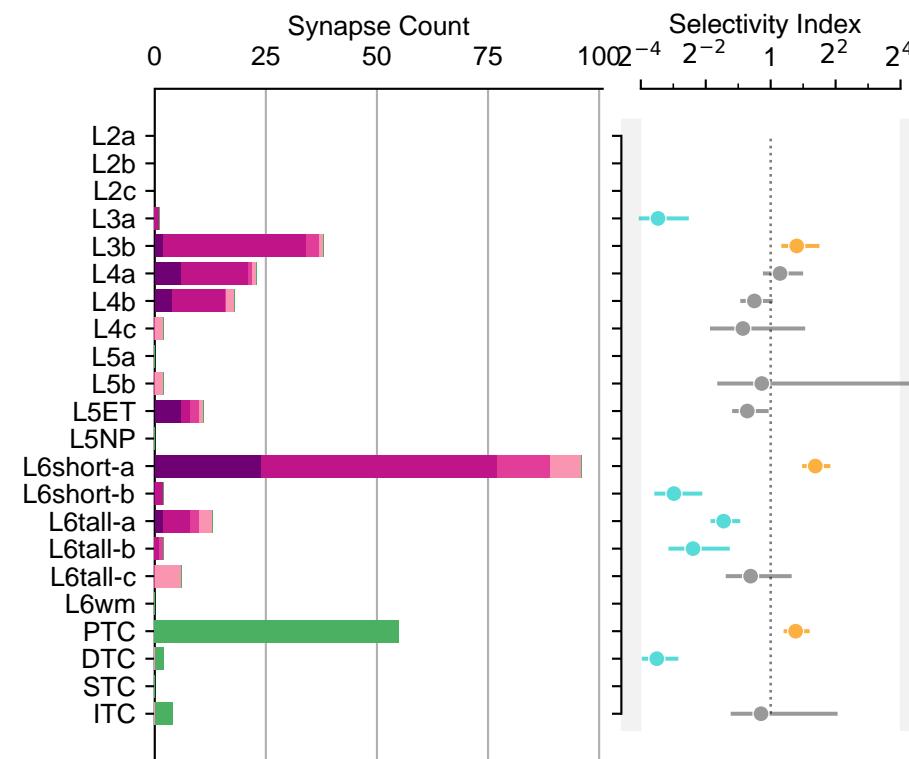

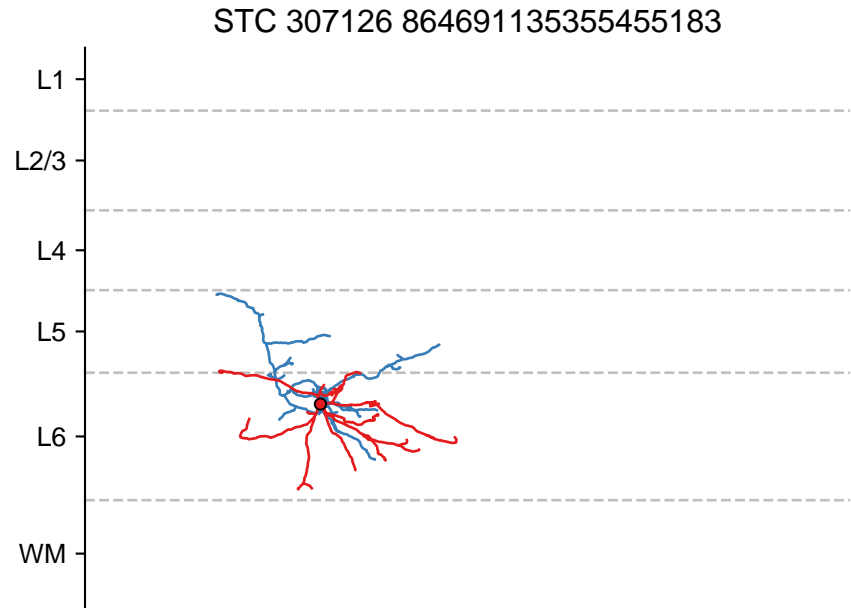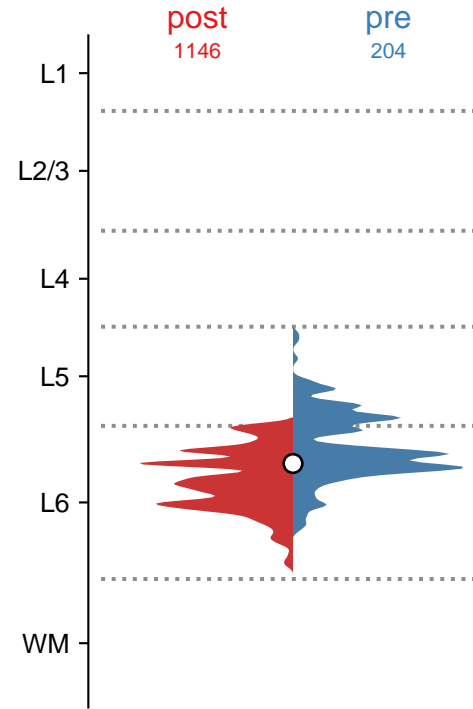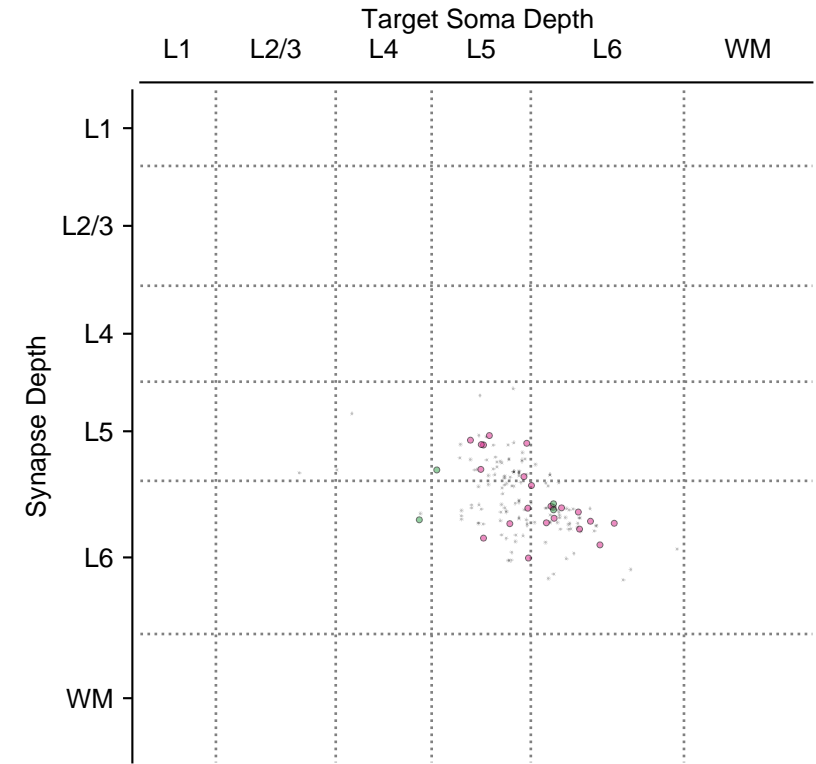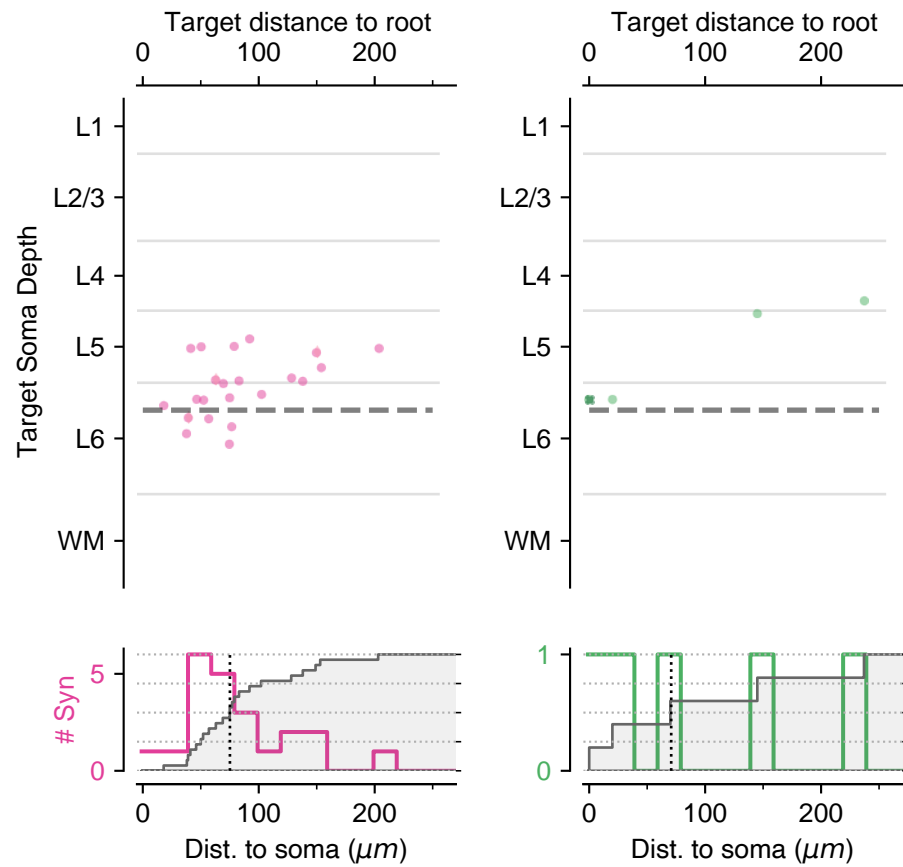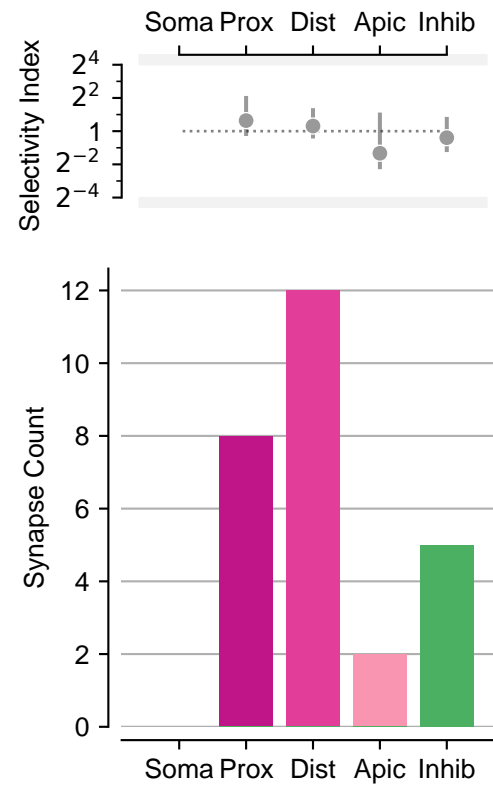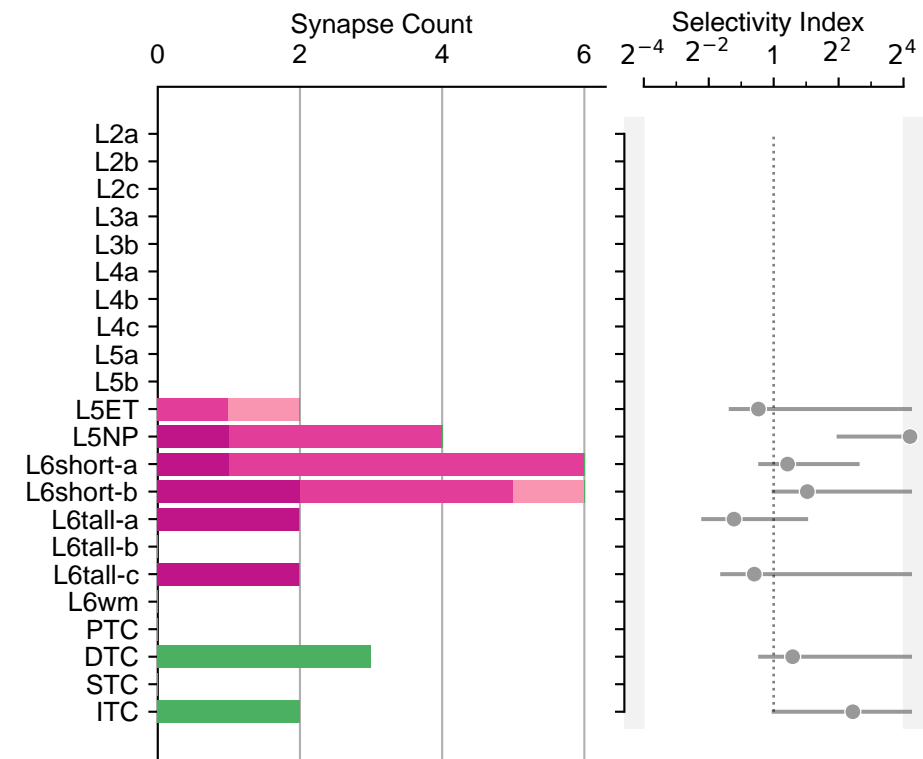

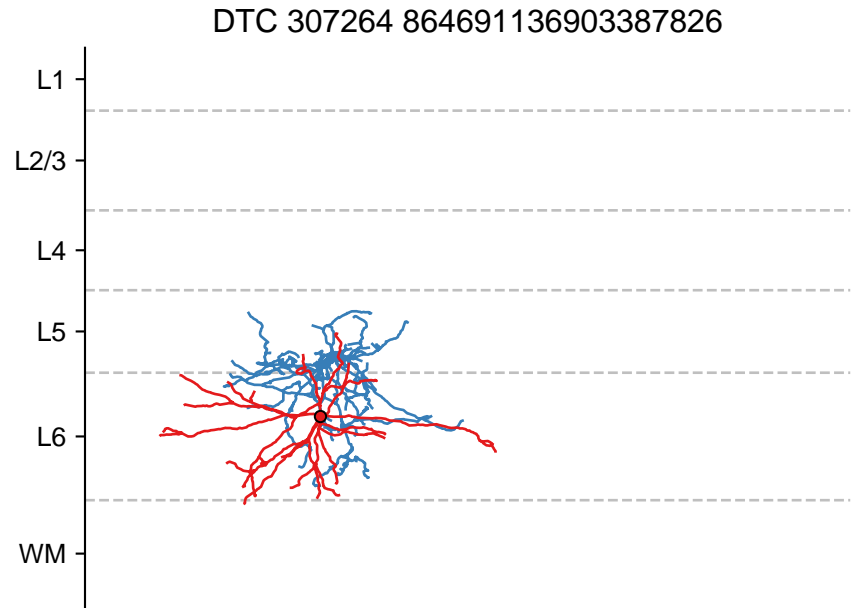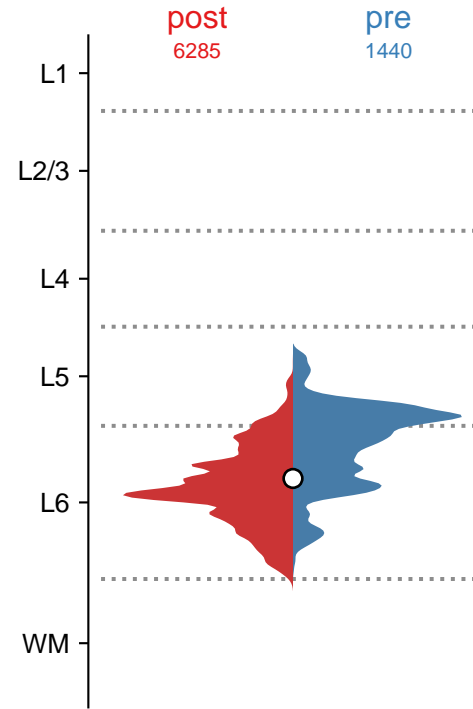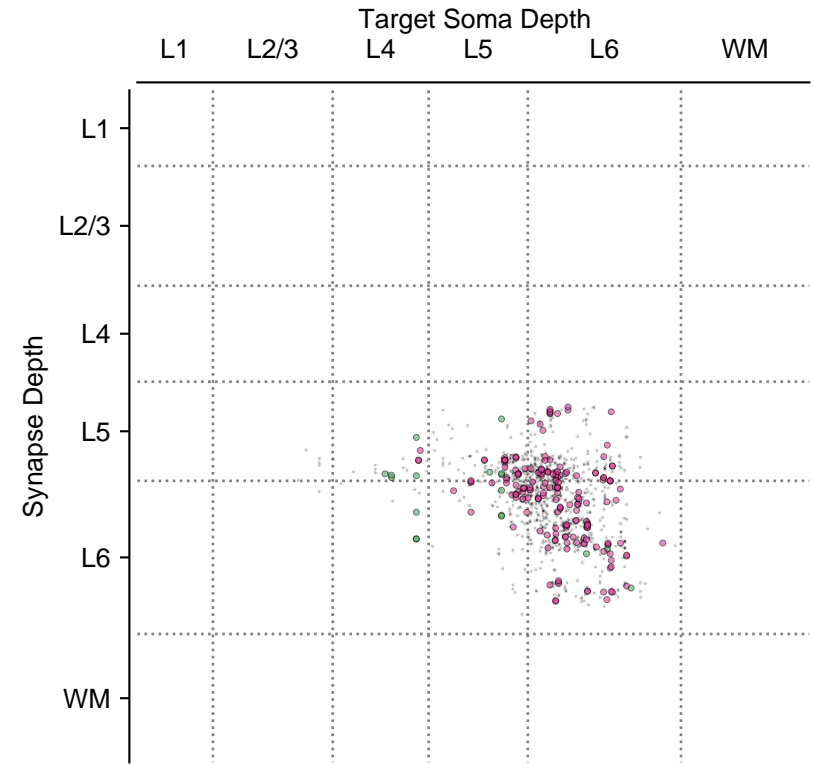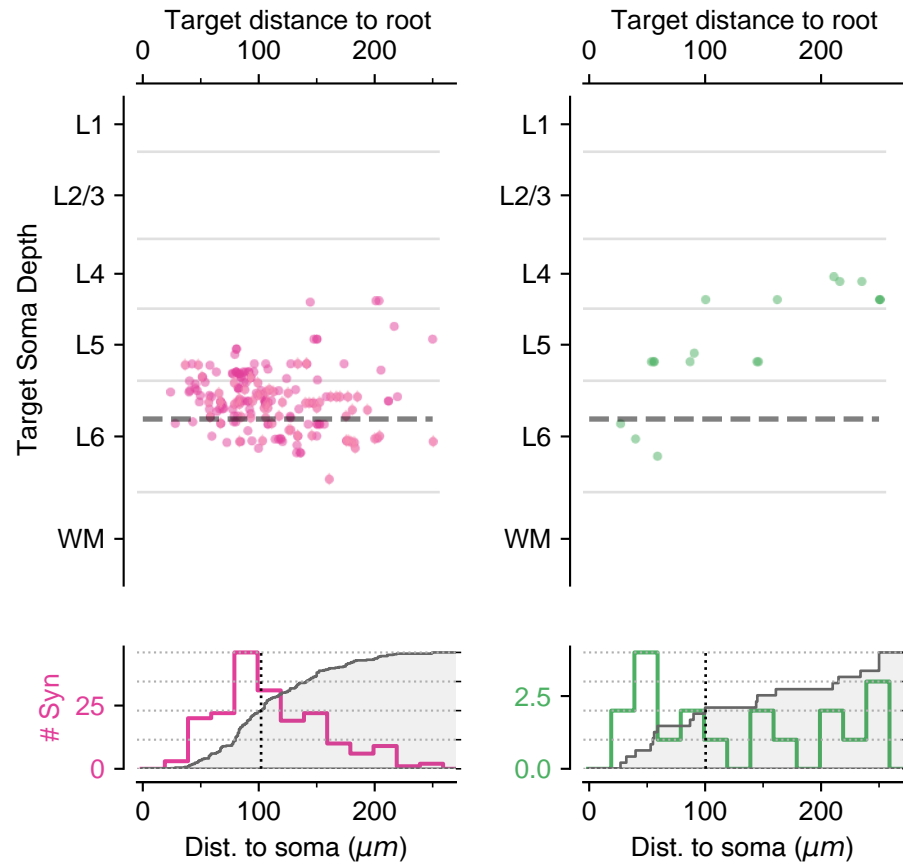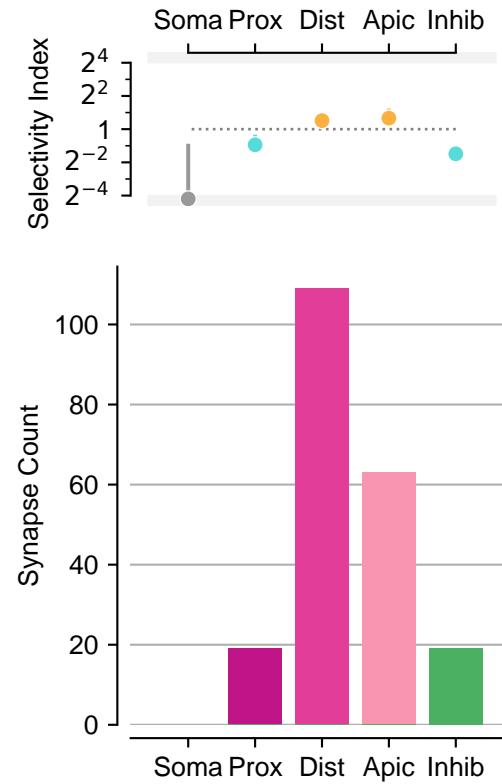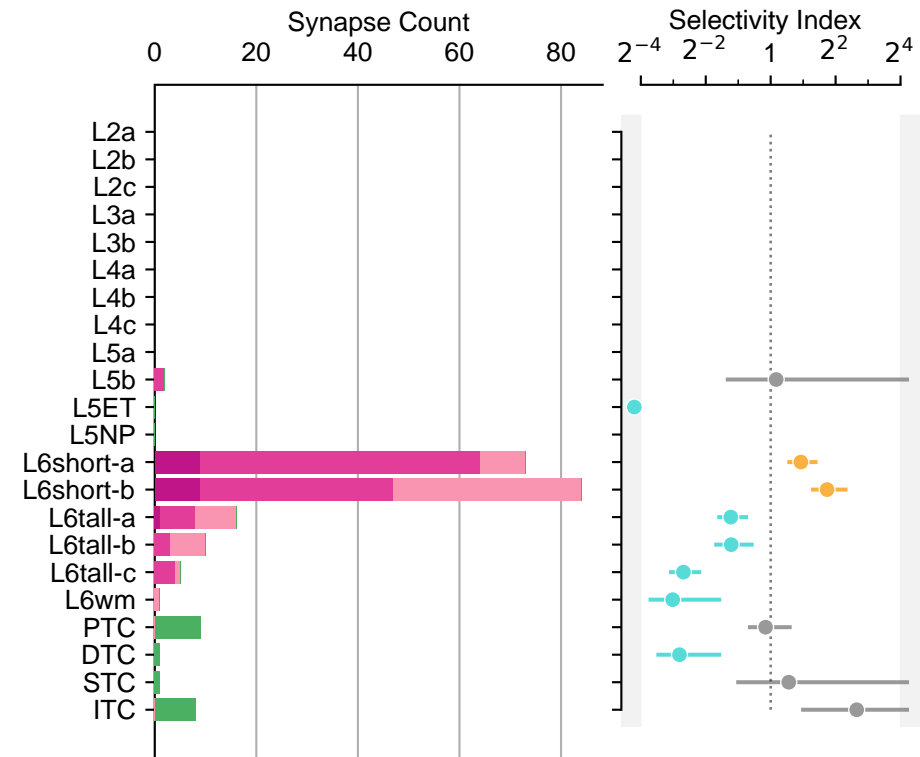

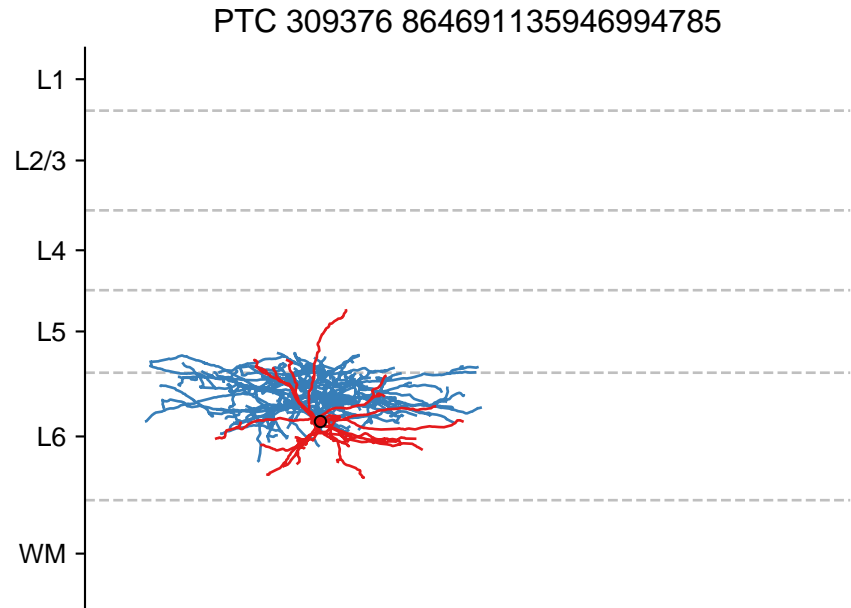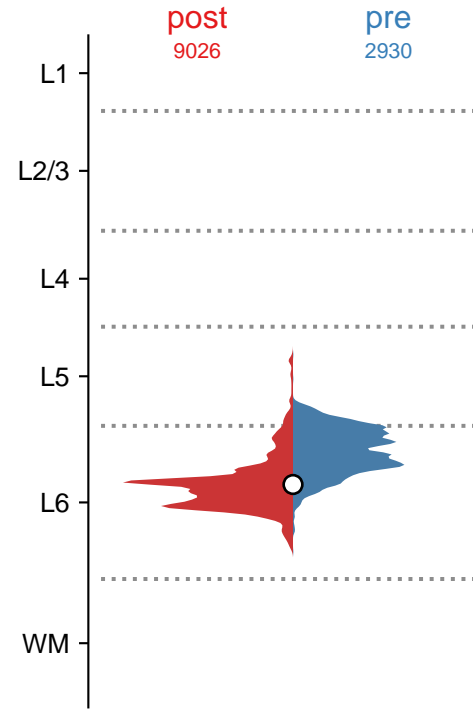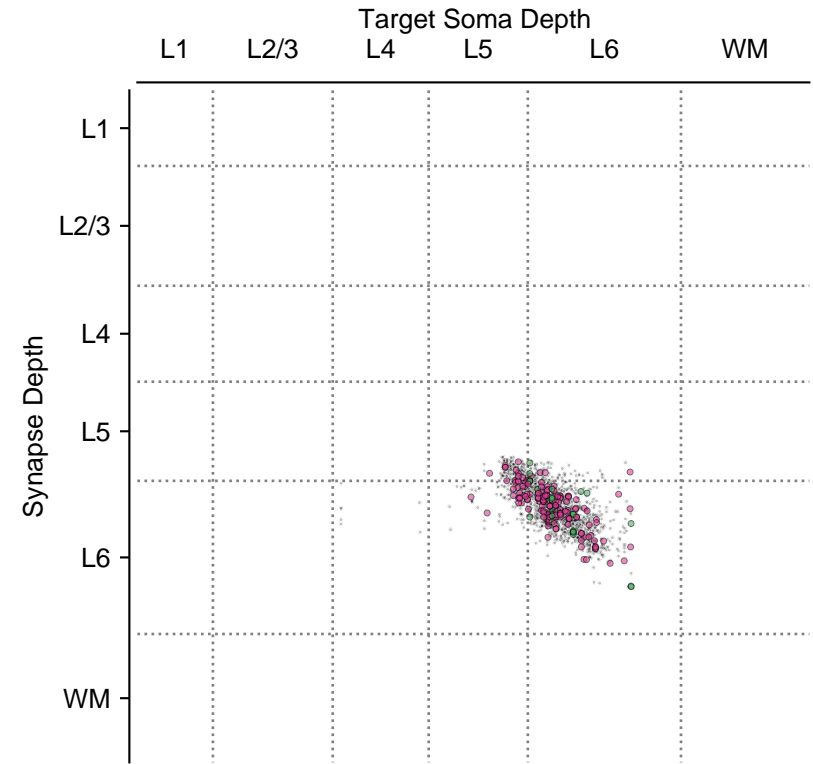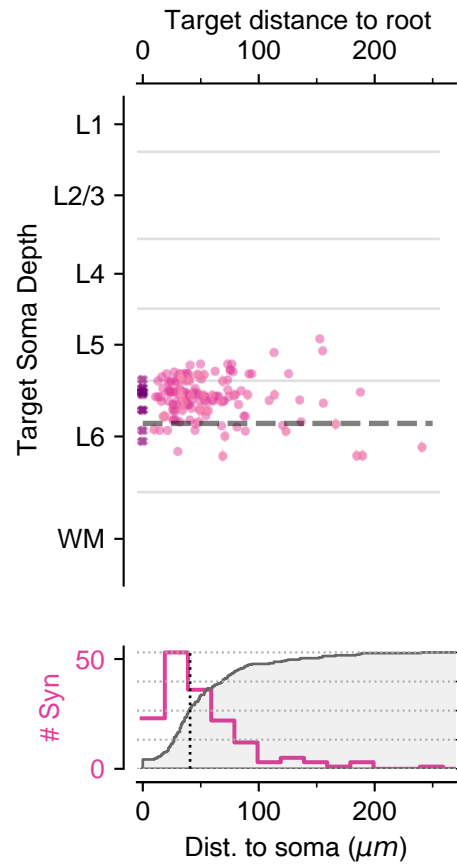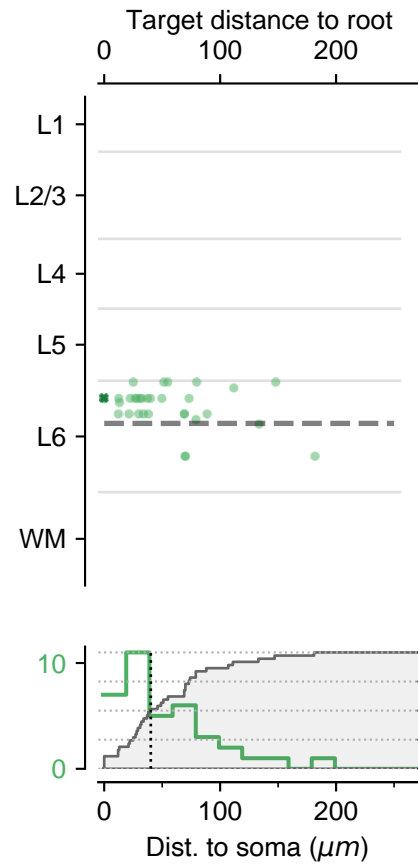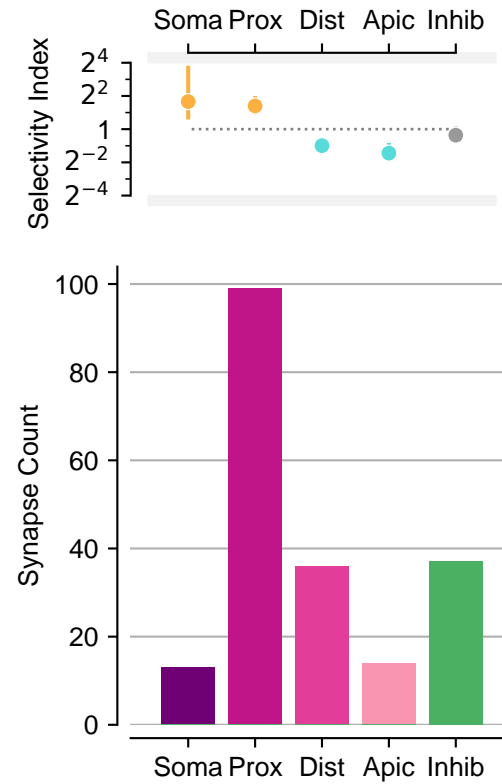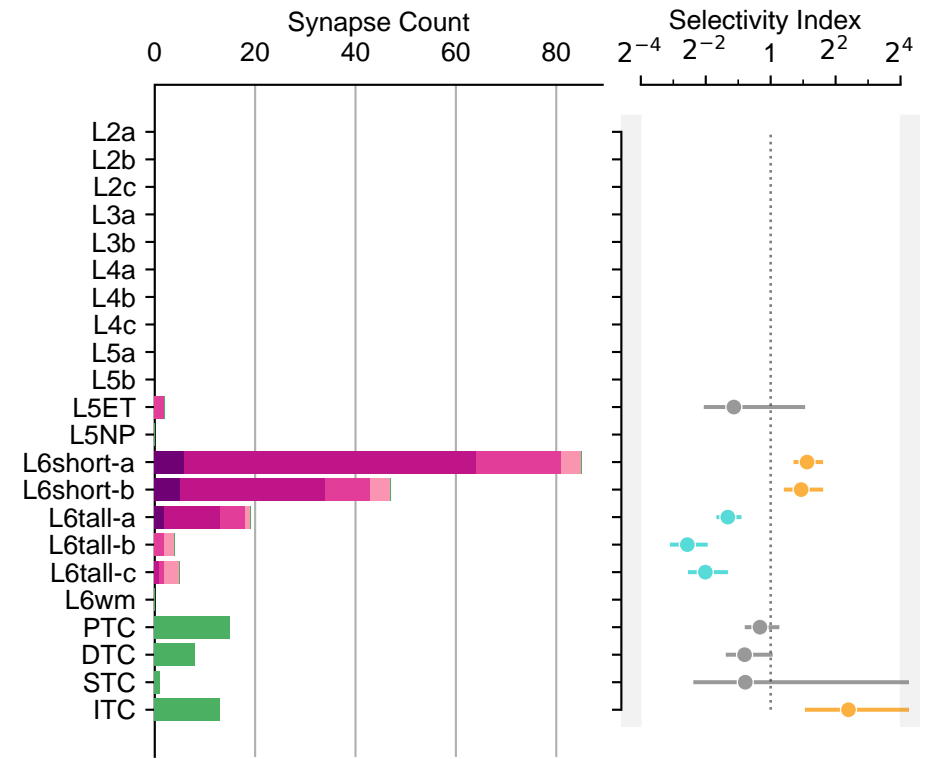

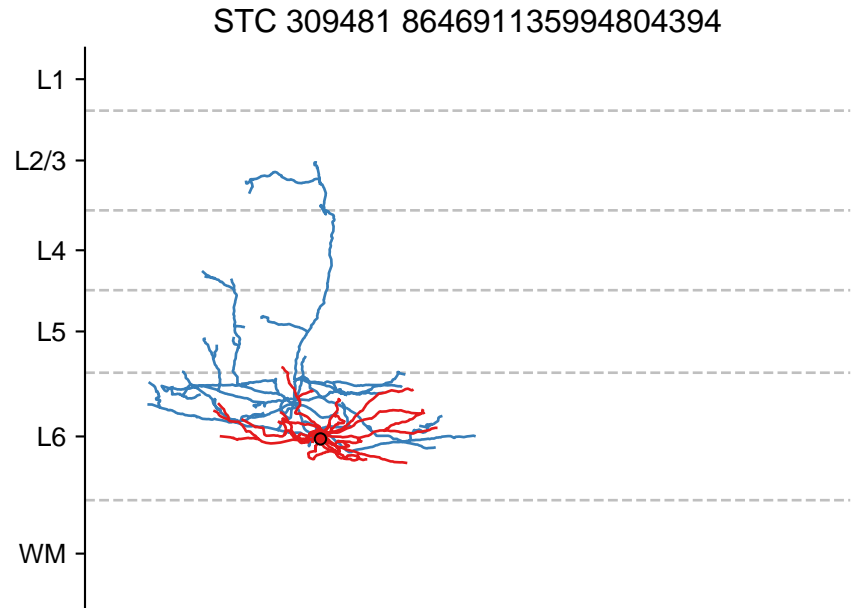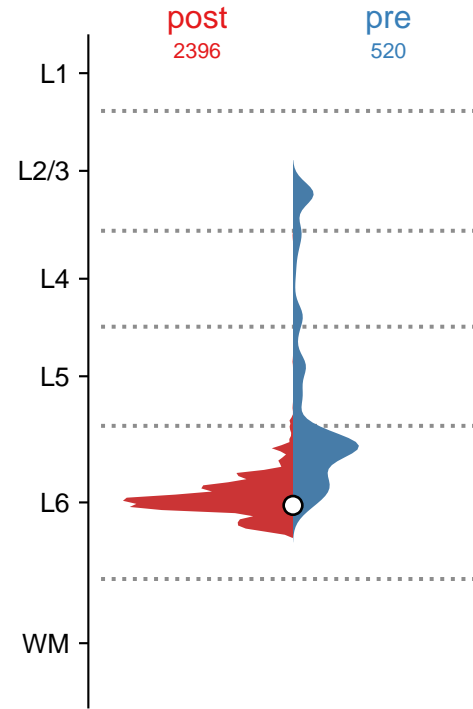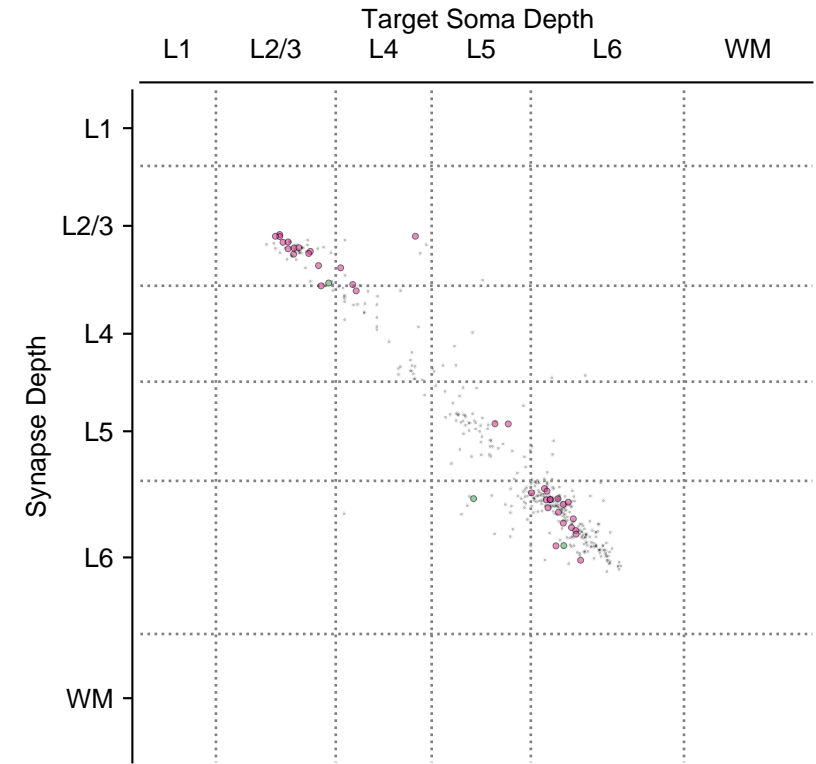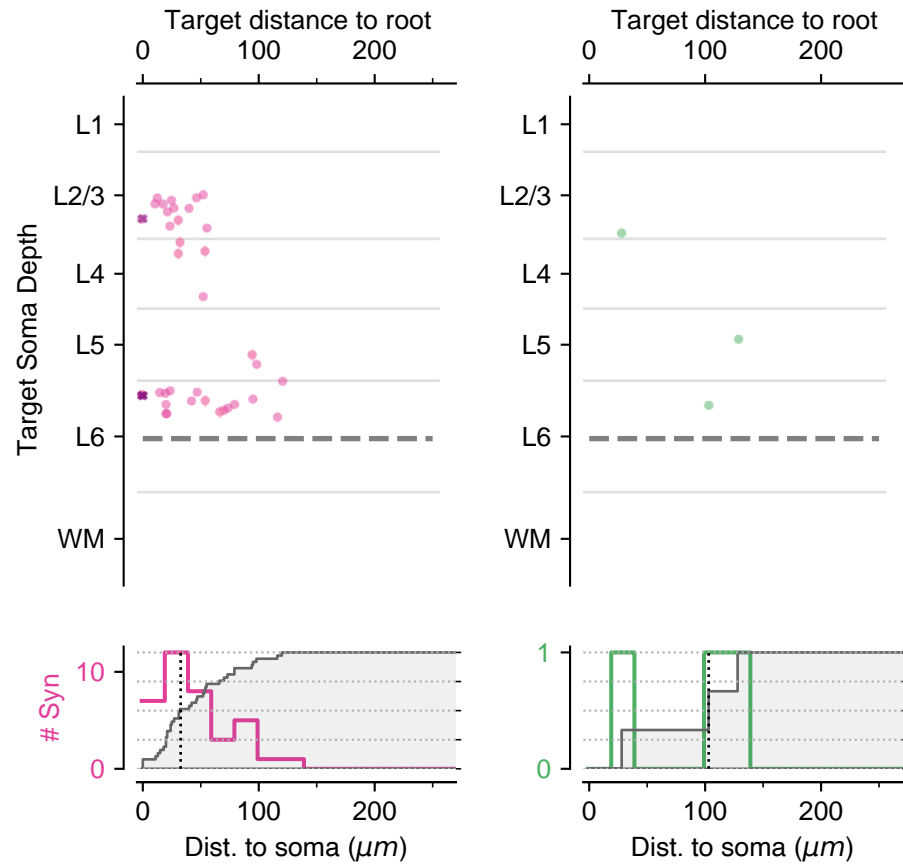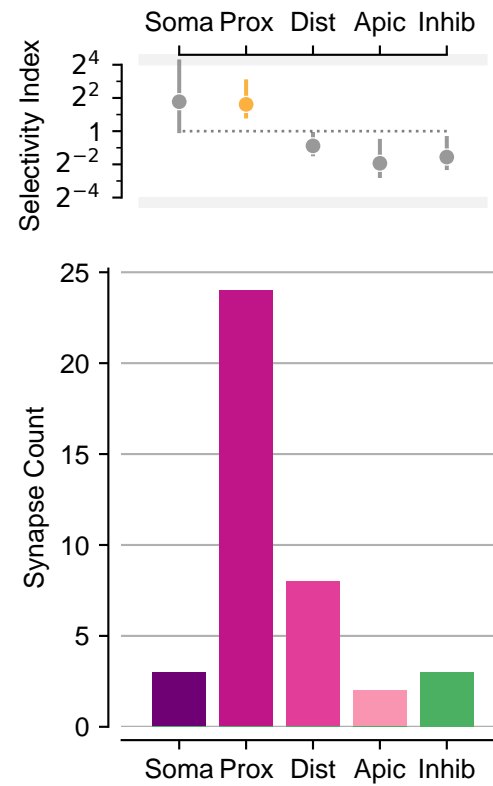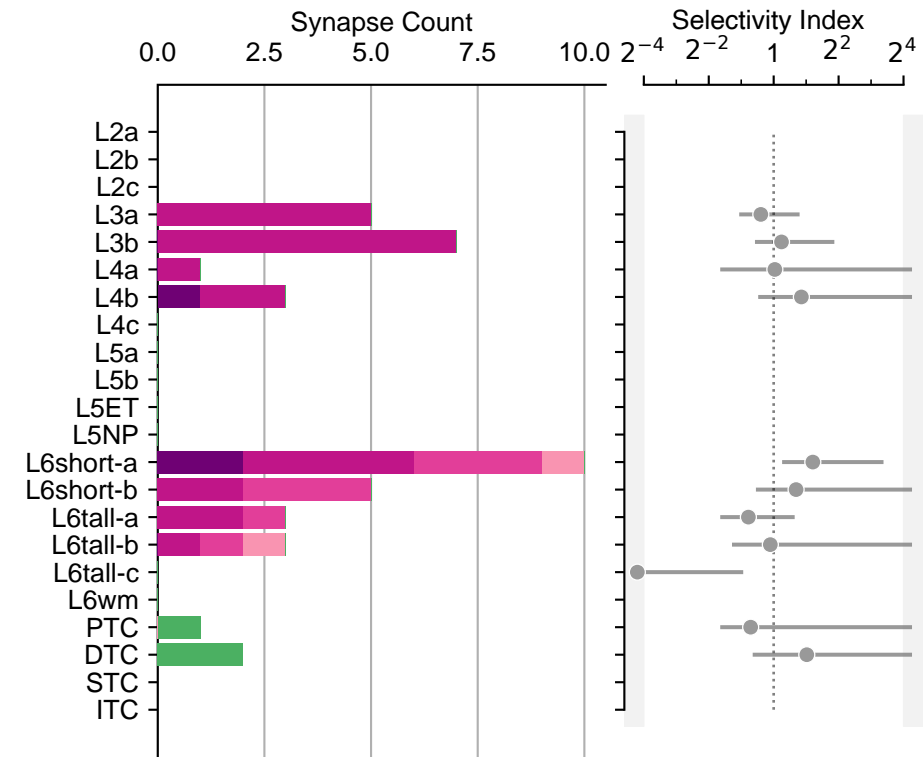

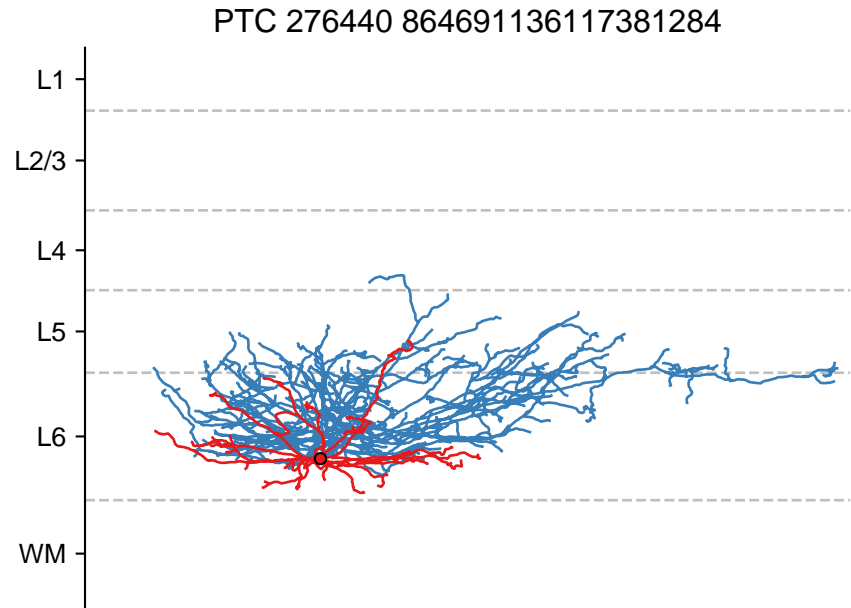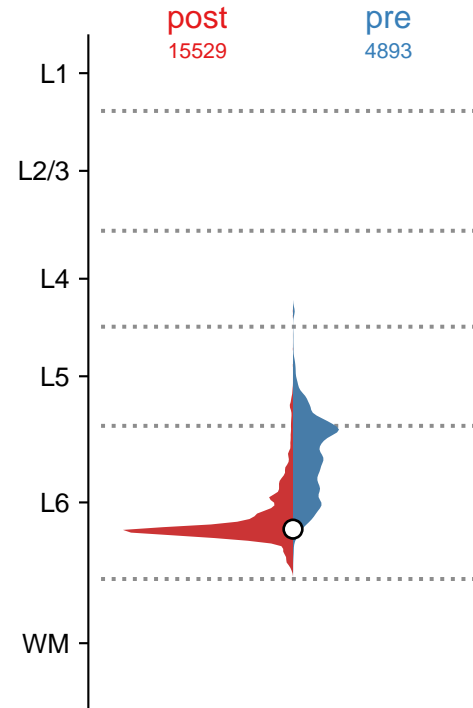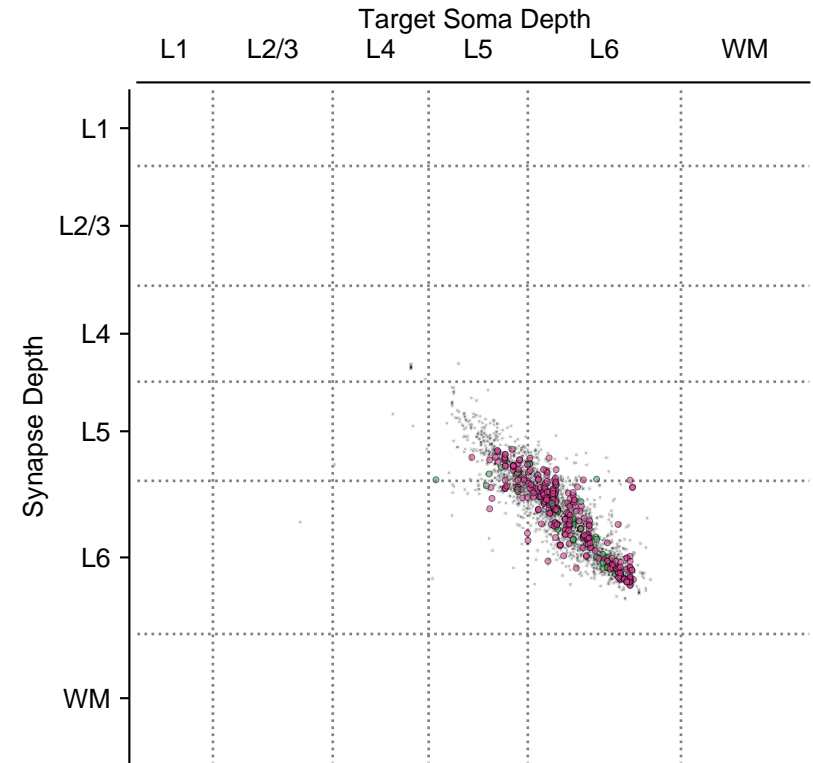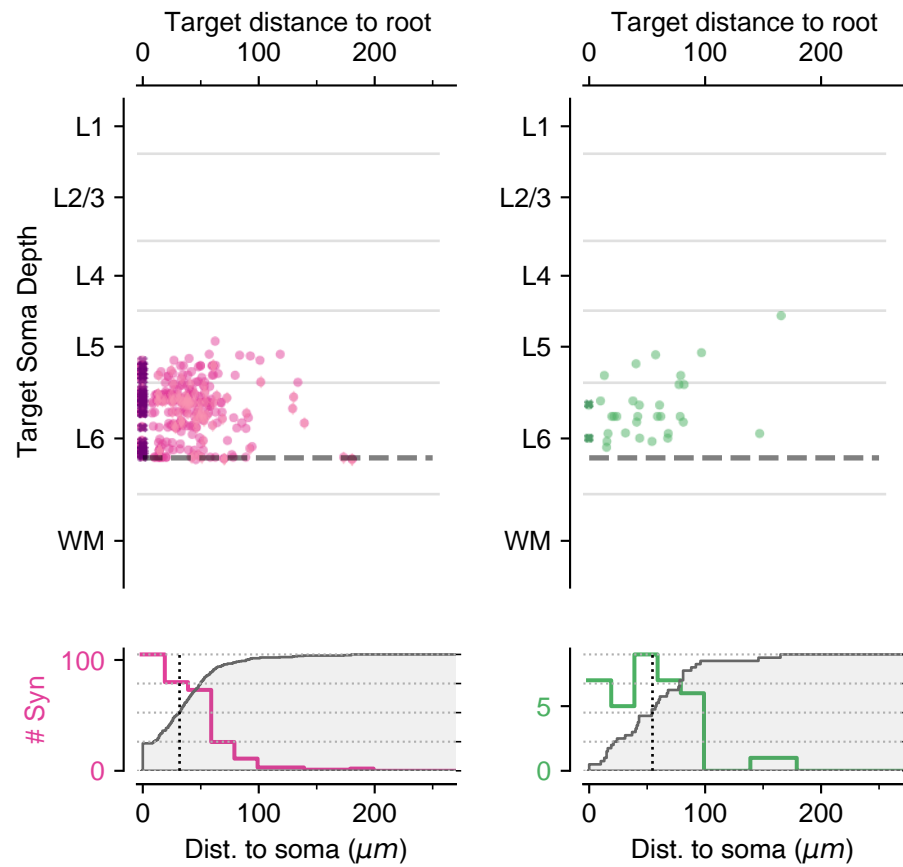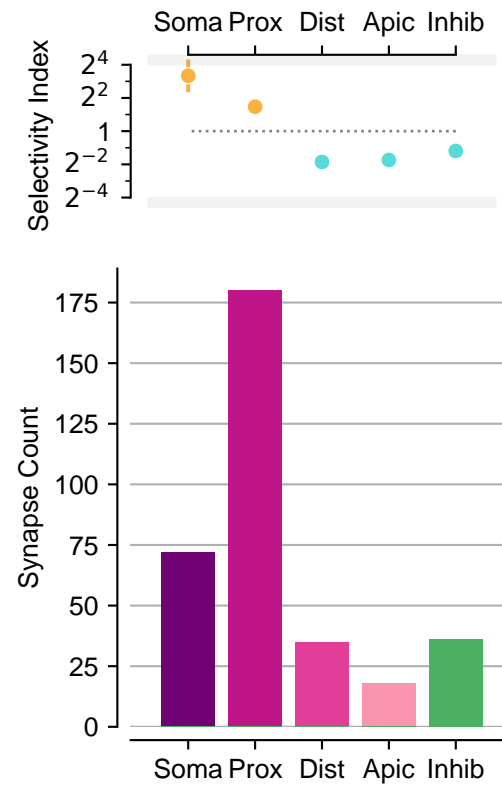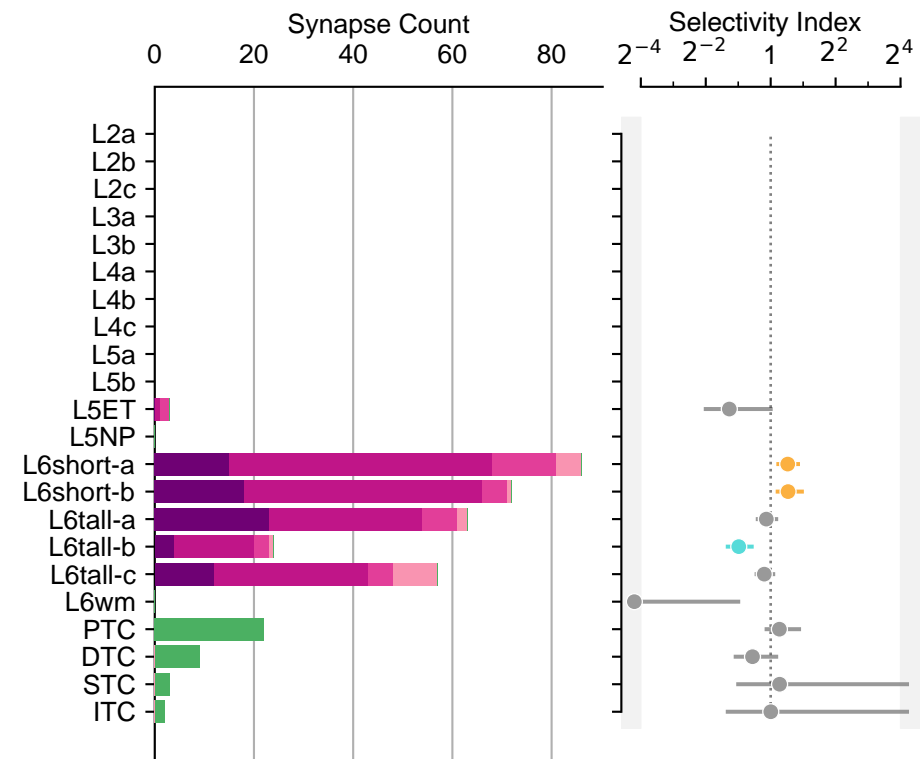

# Motif Group 14

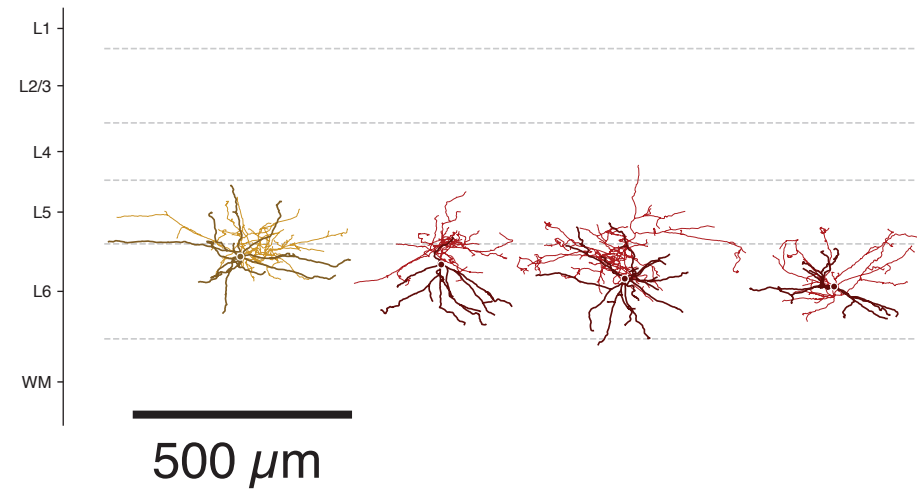



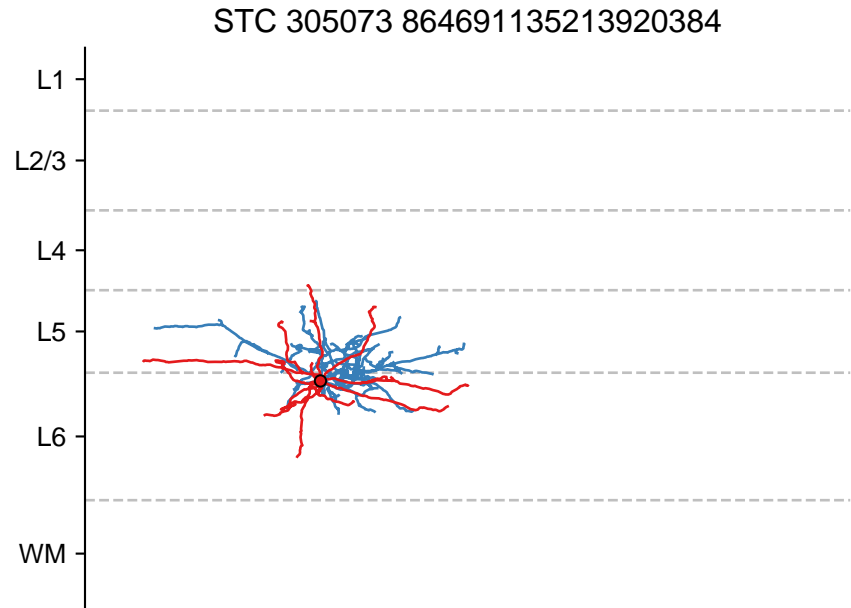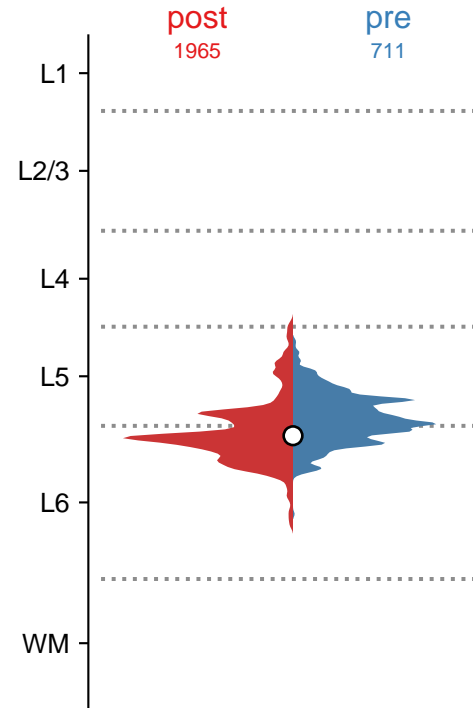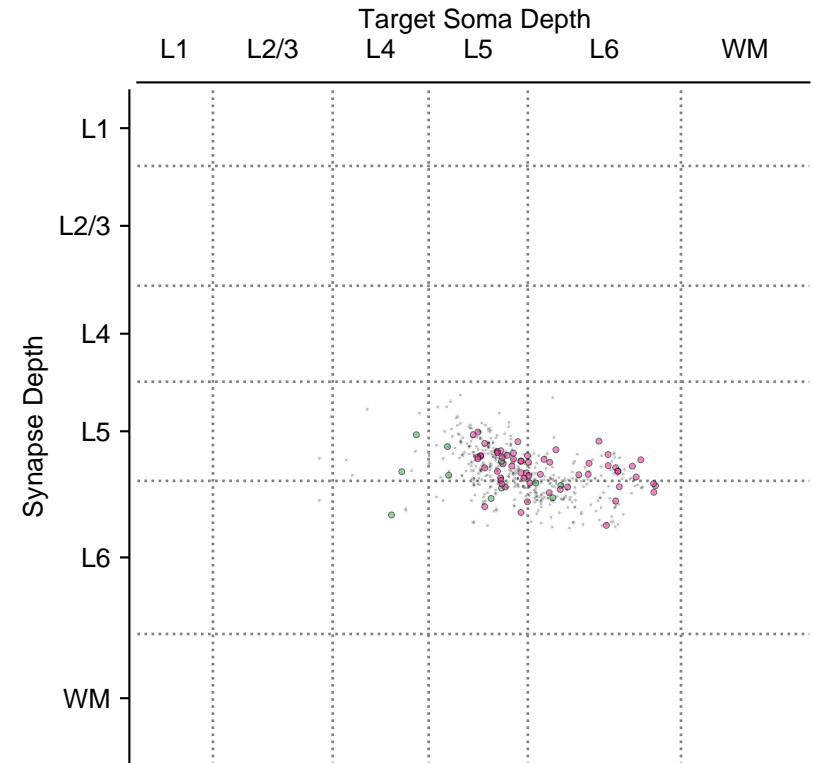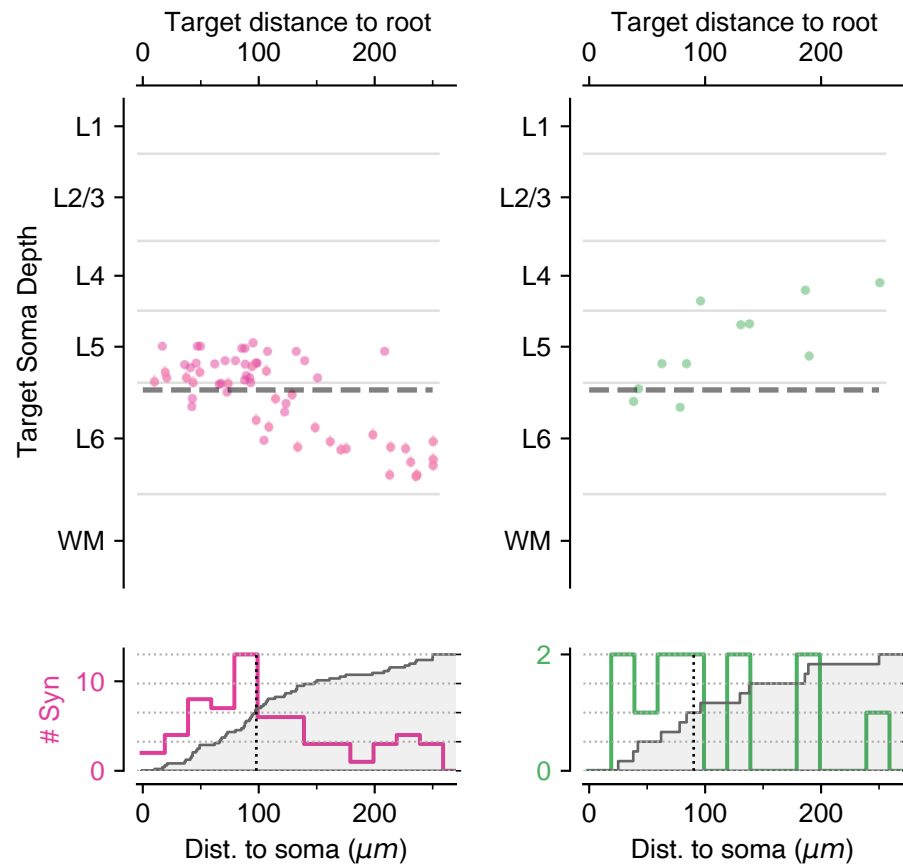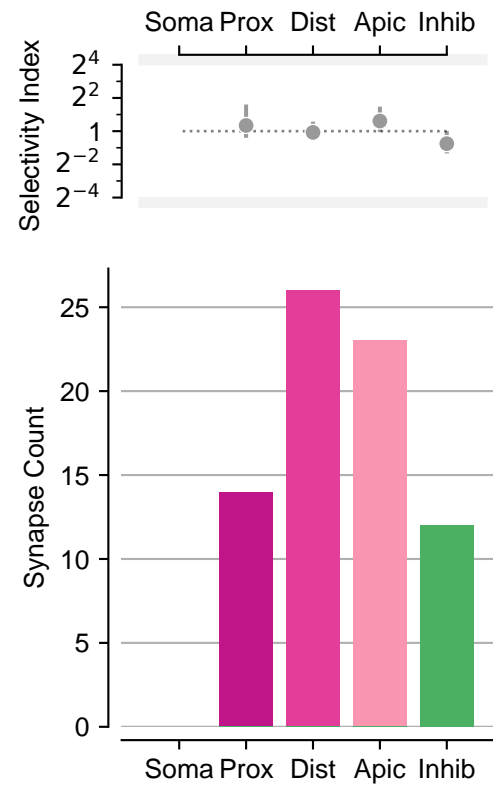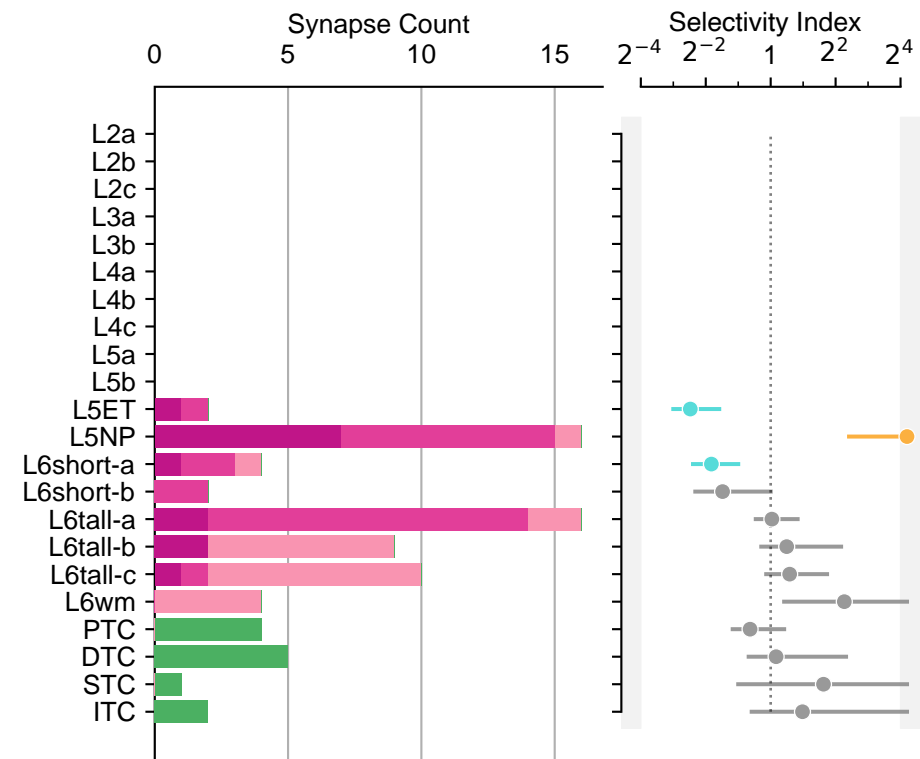

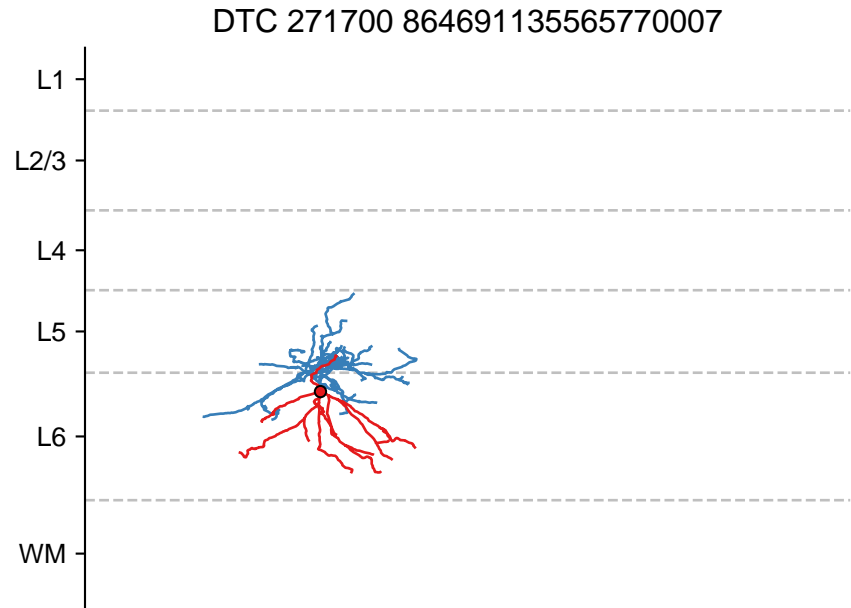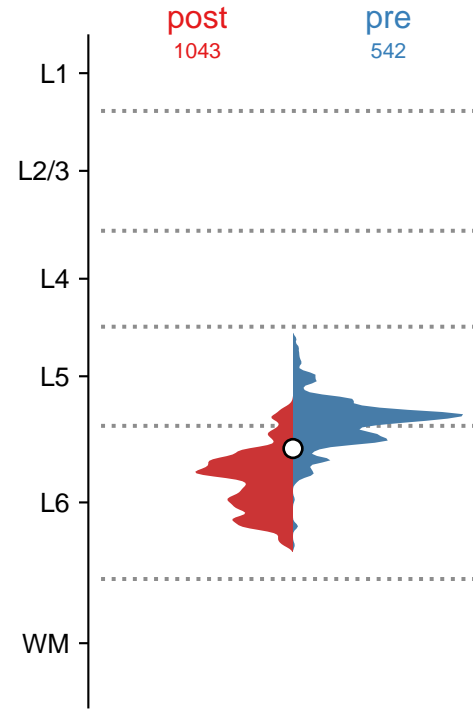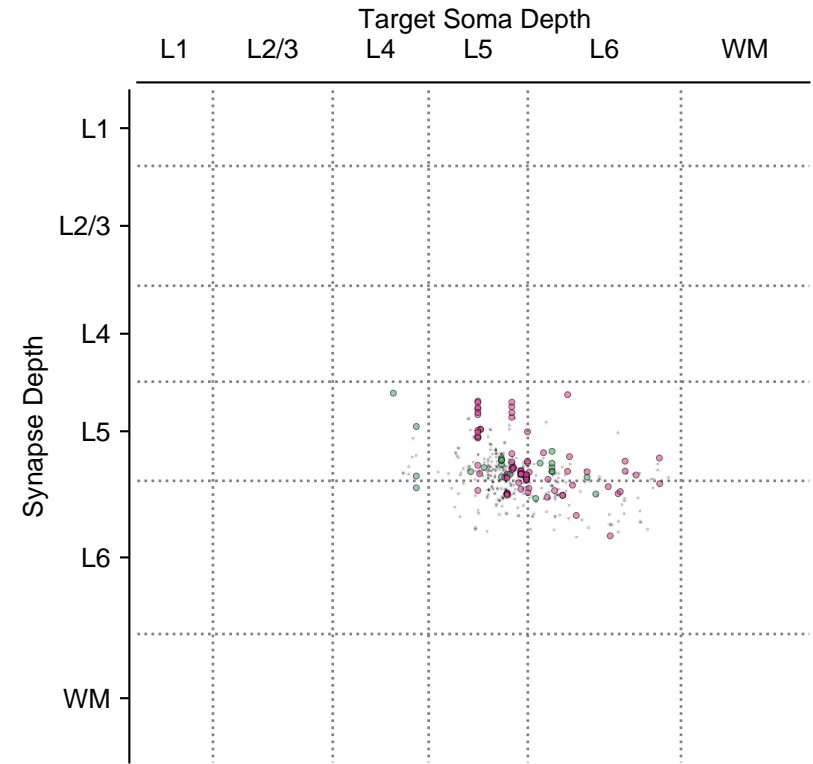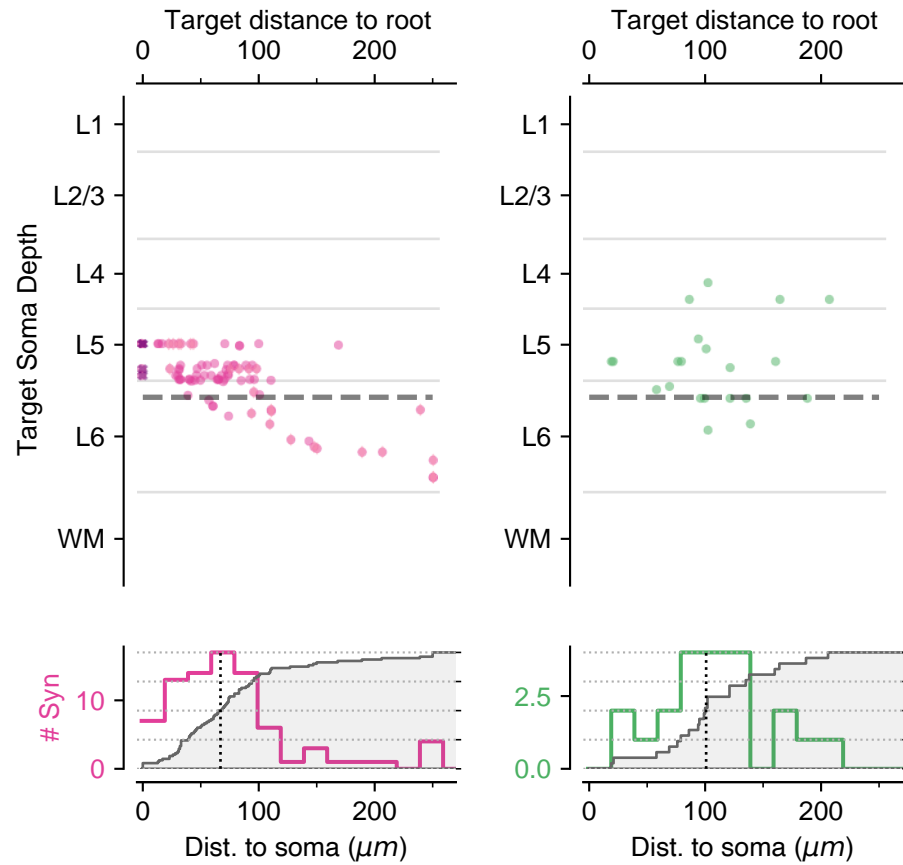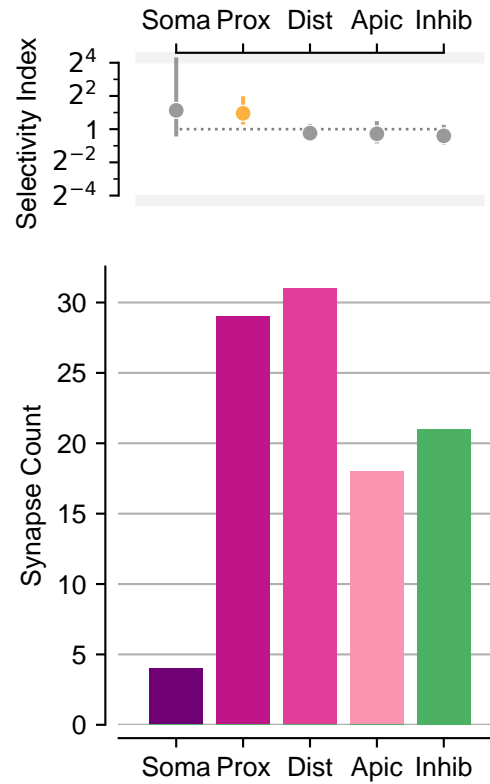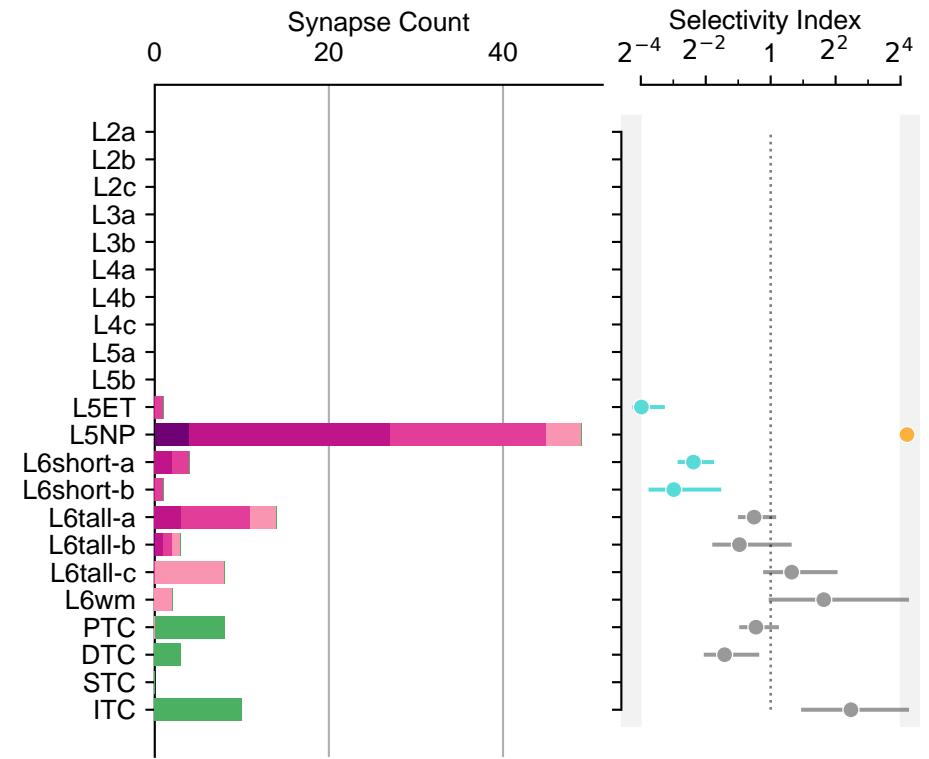

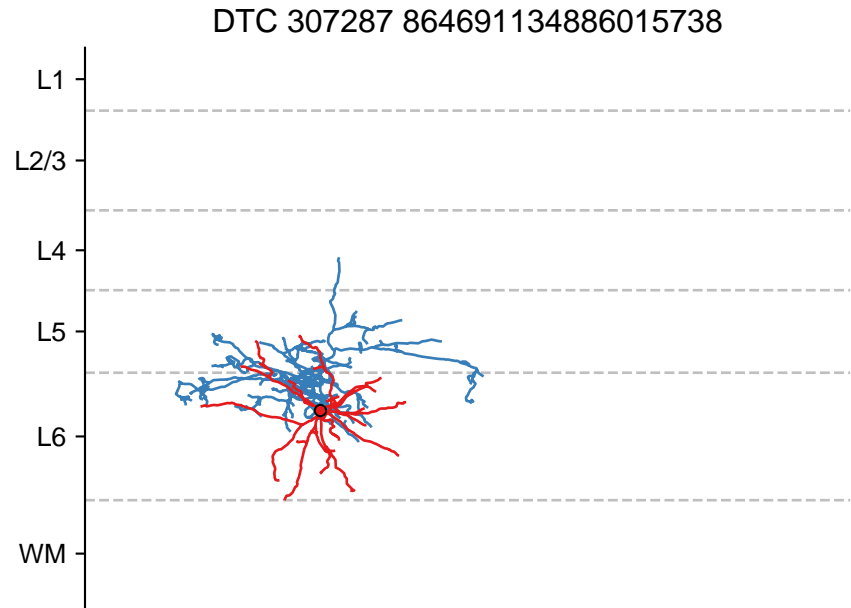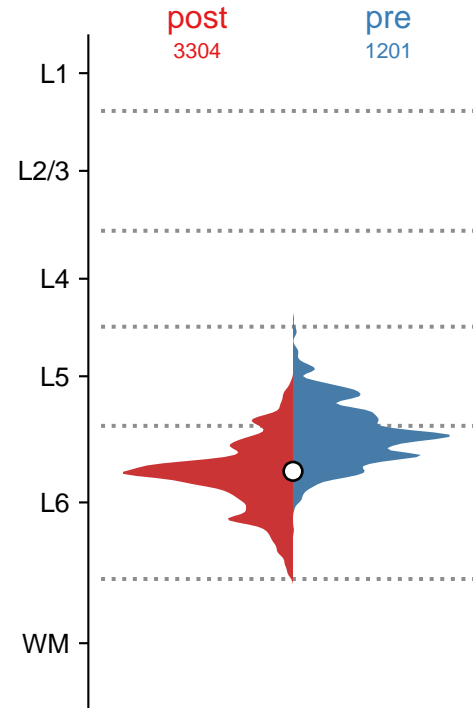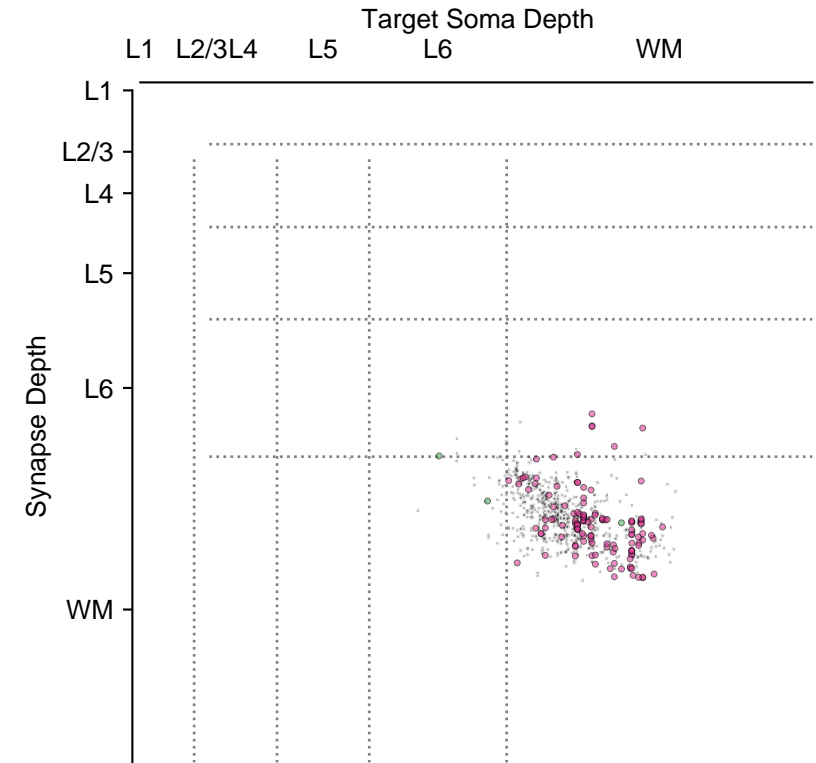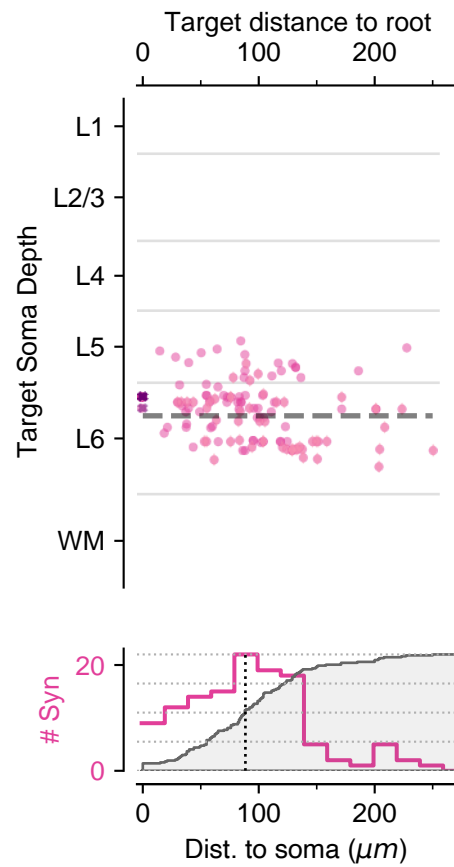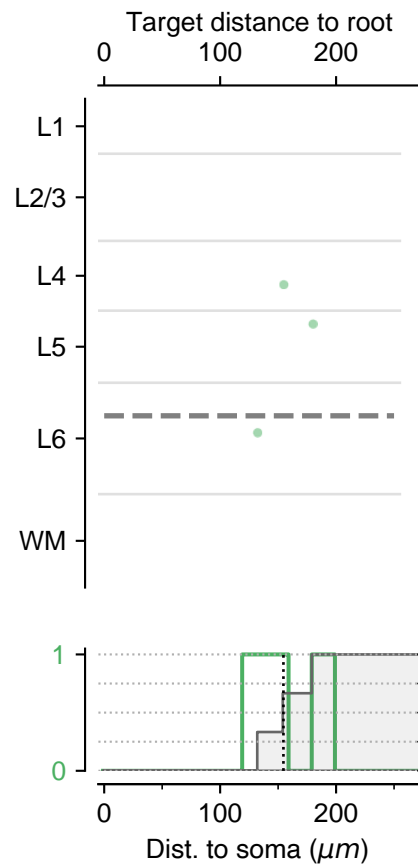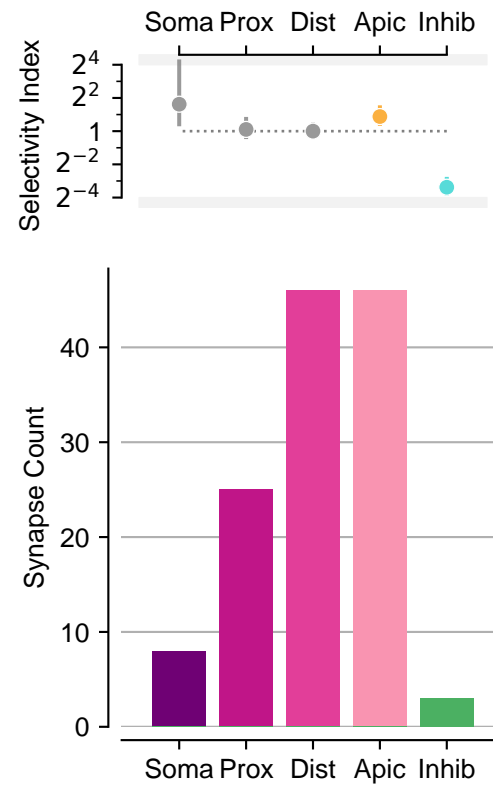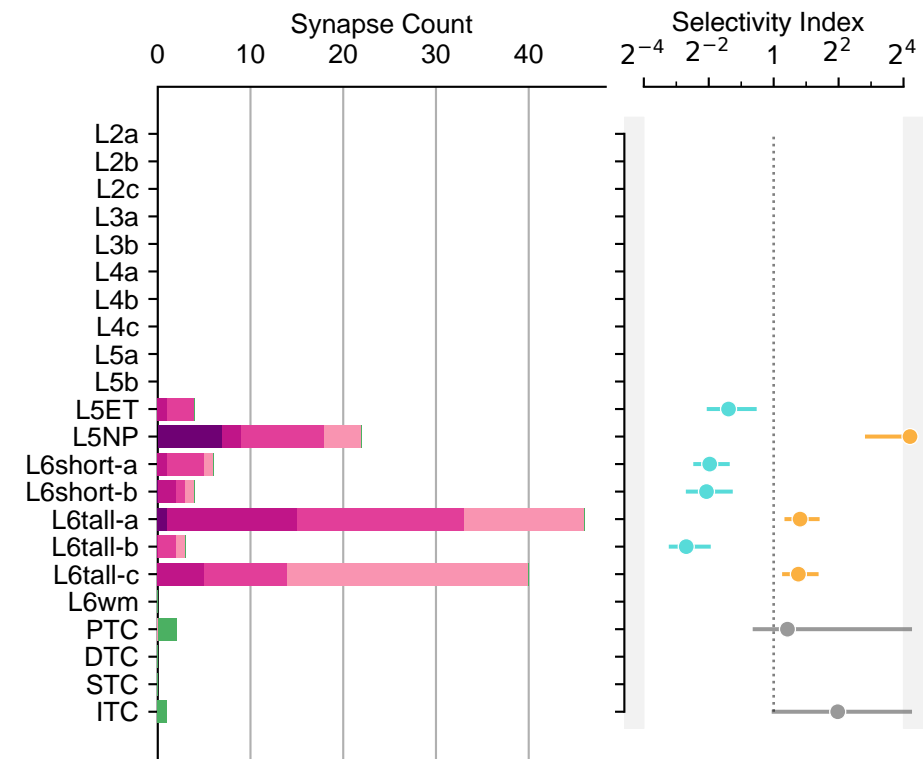

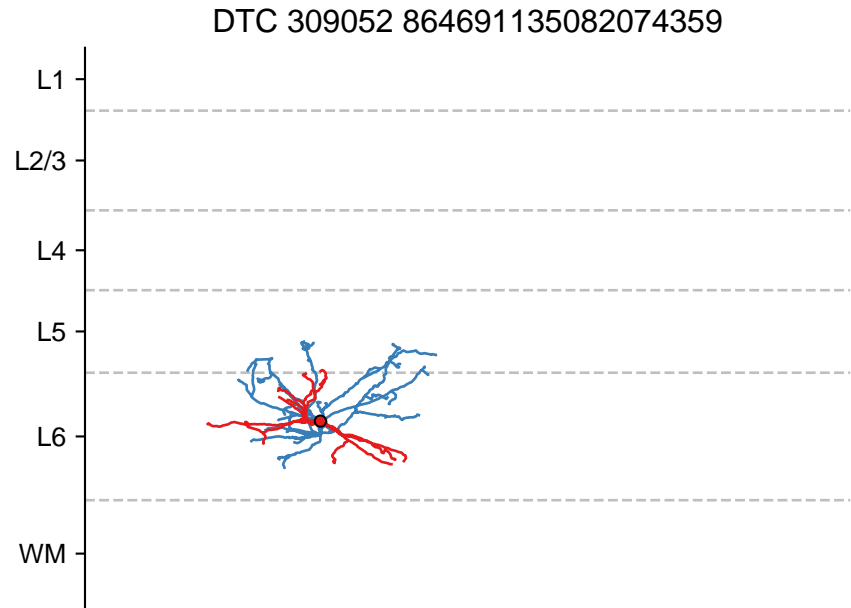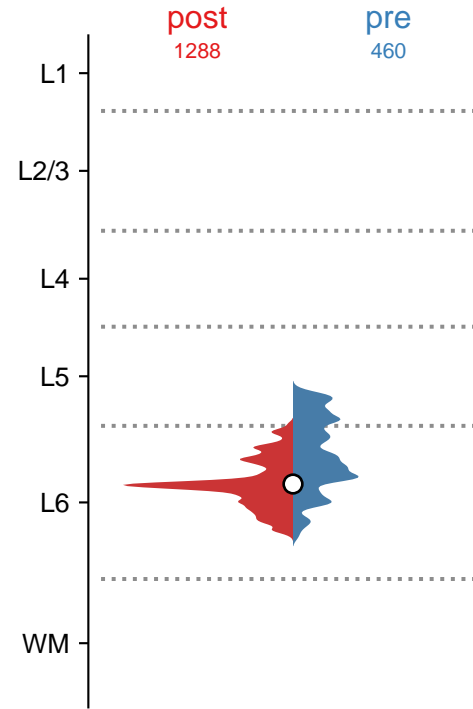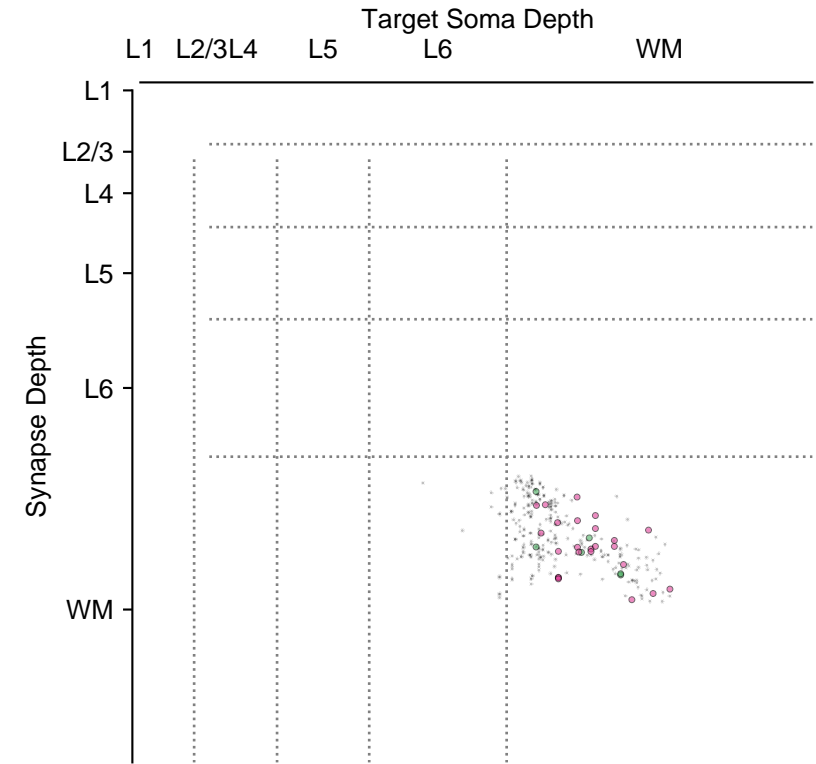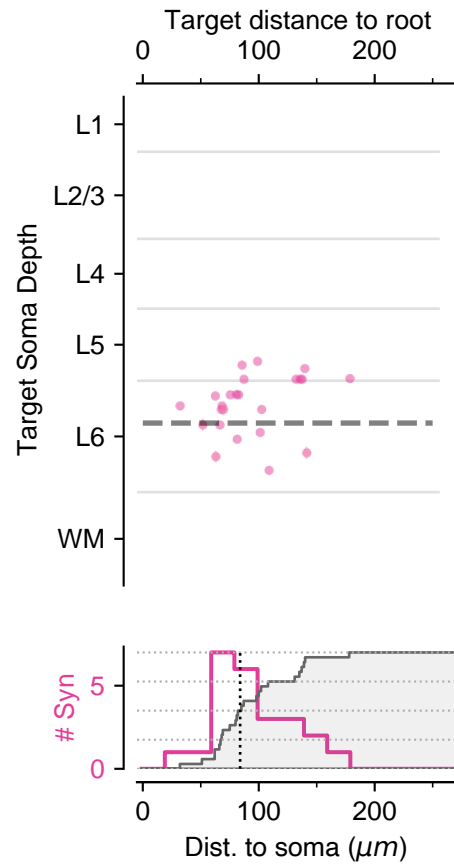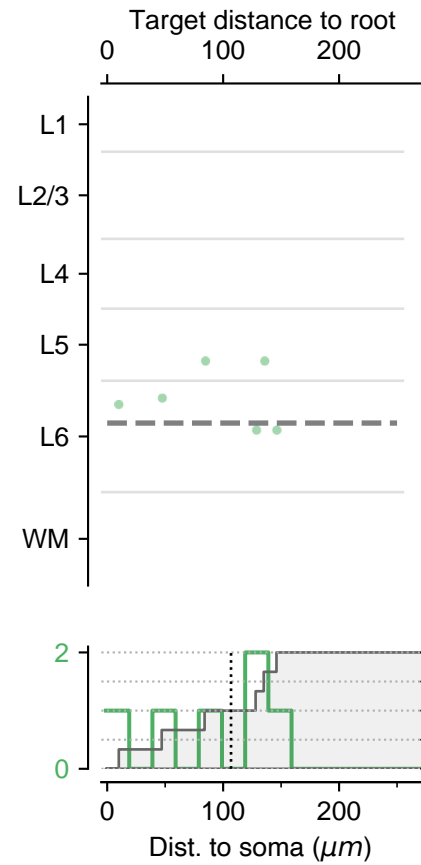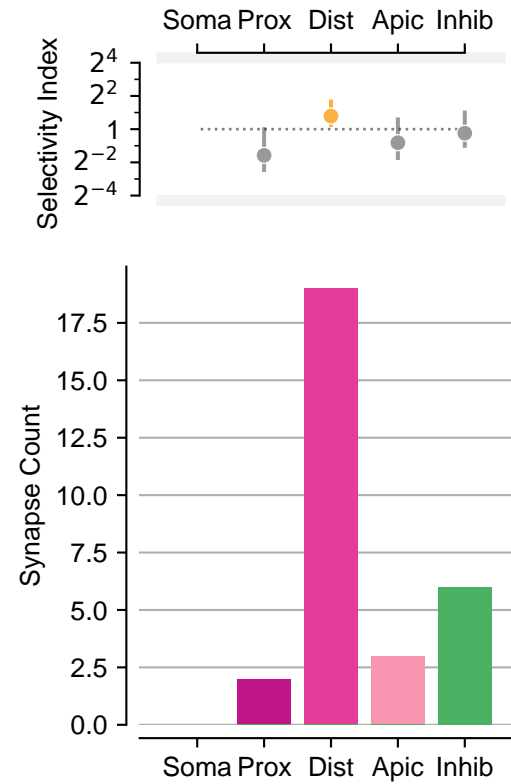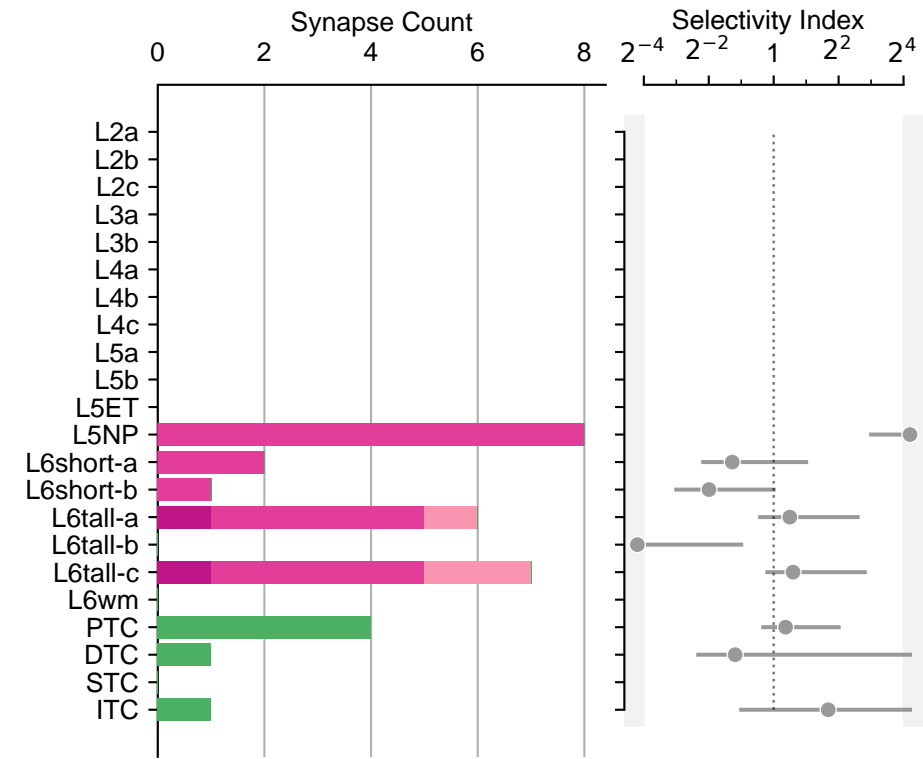

# Motif Group 15

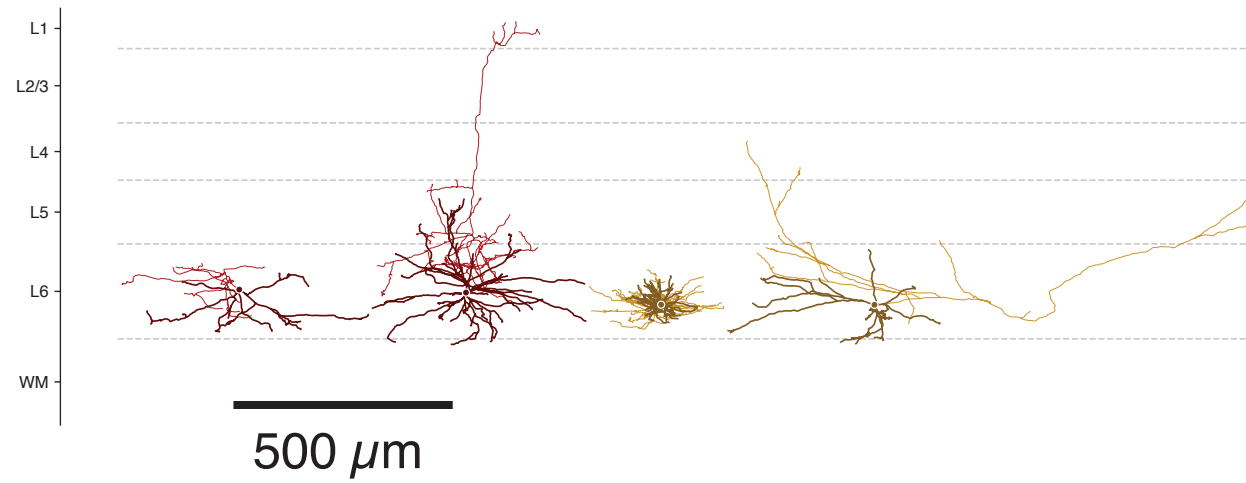

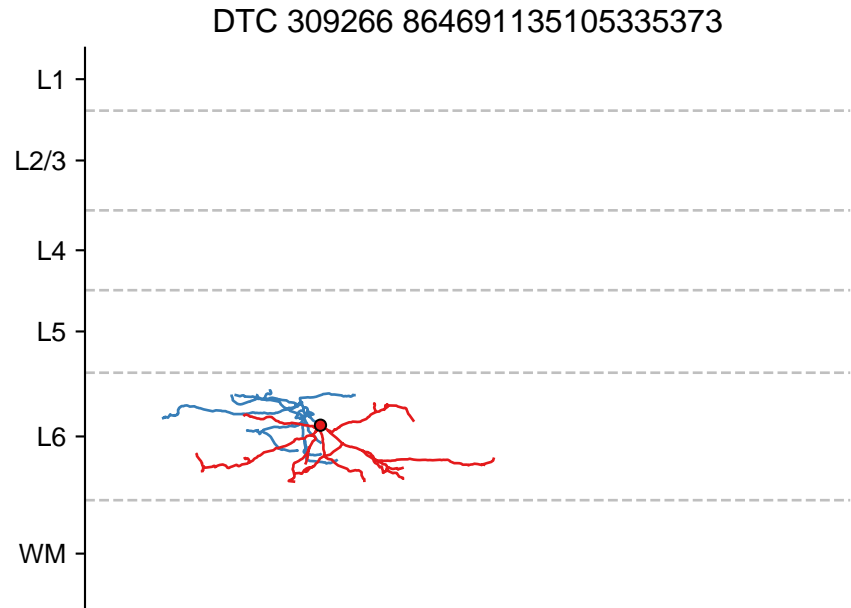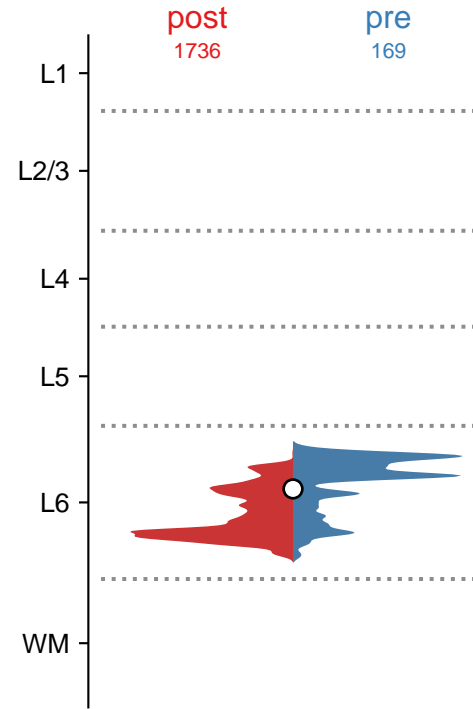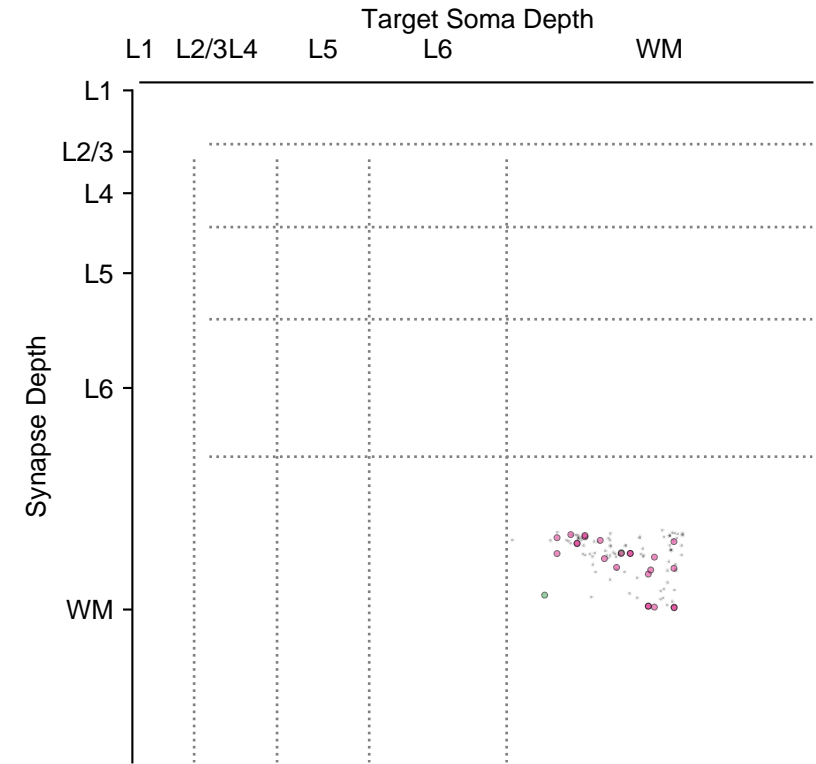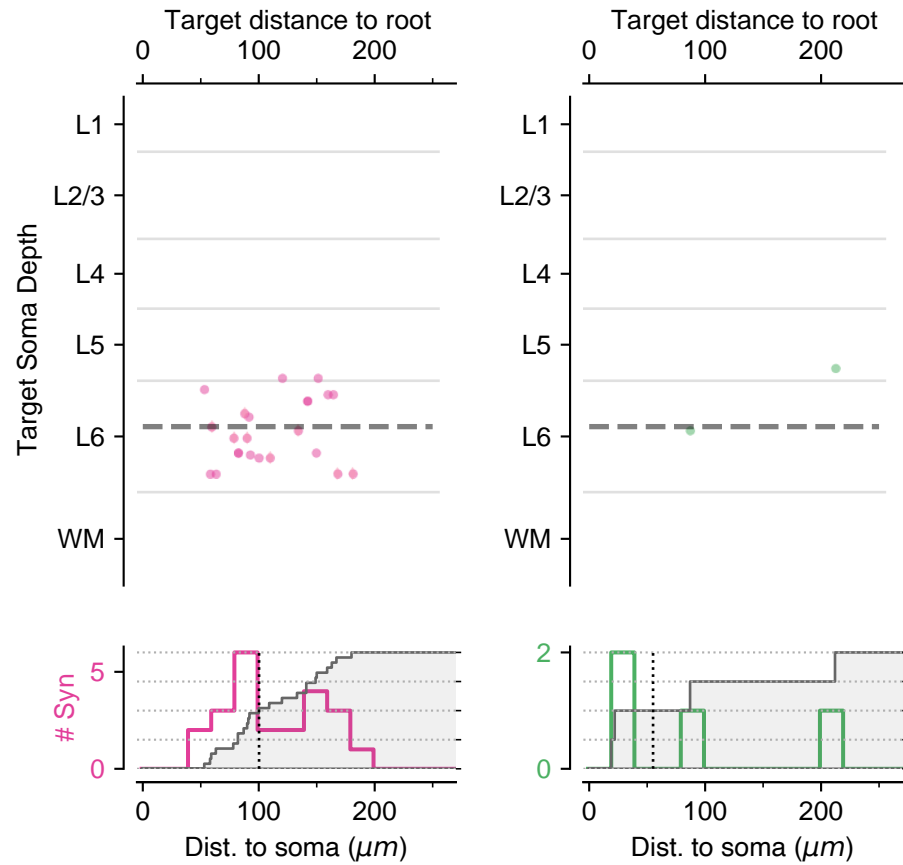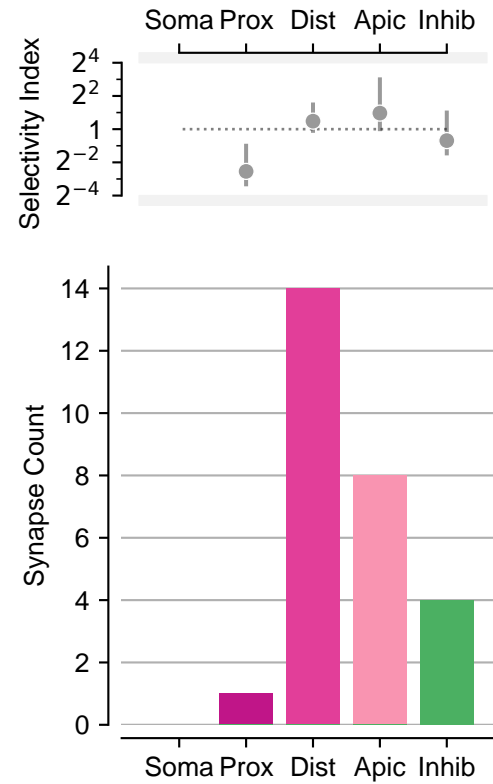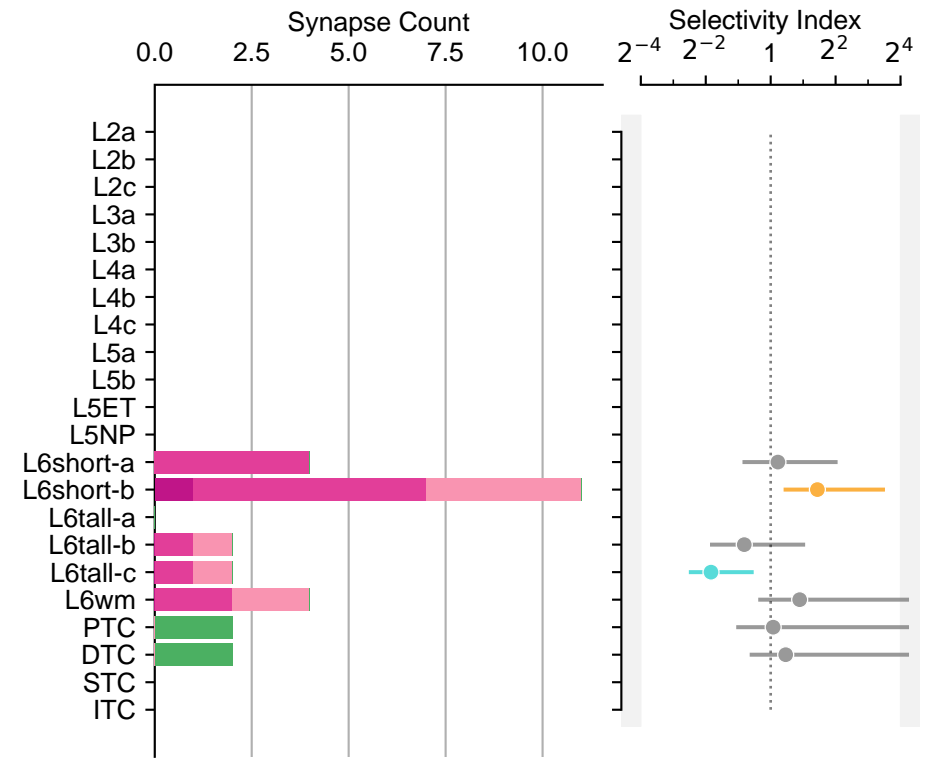

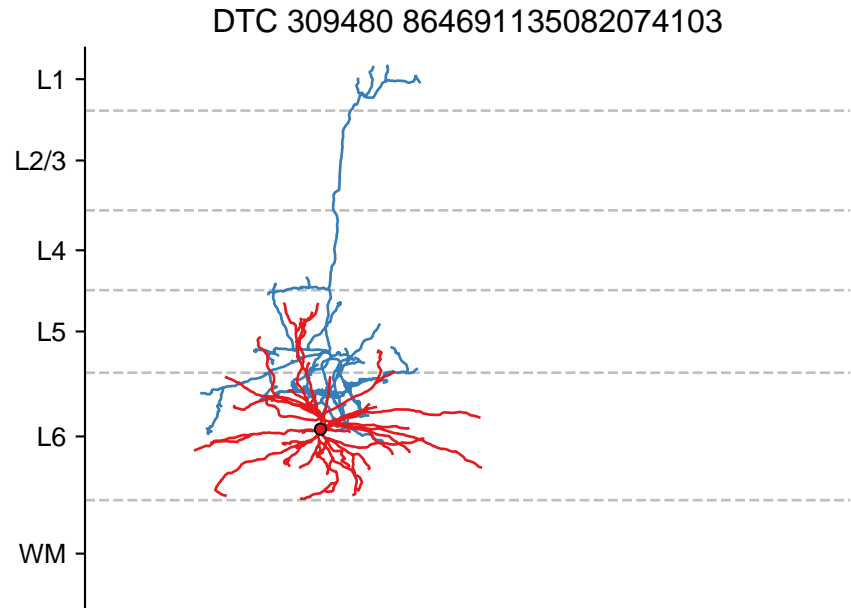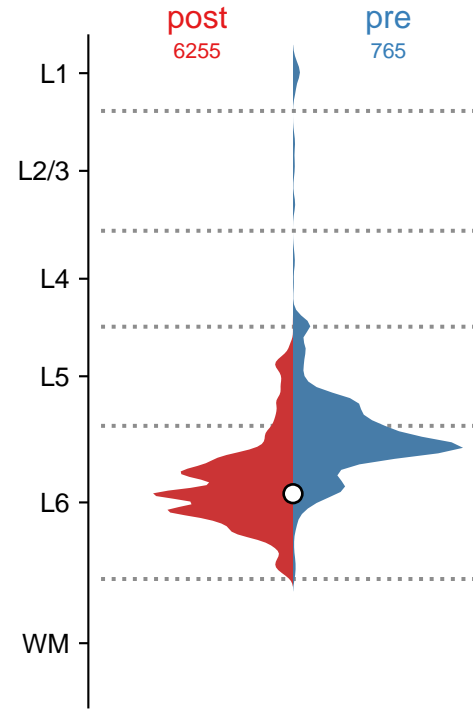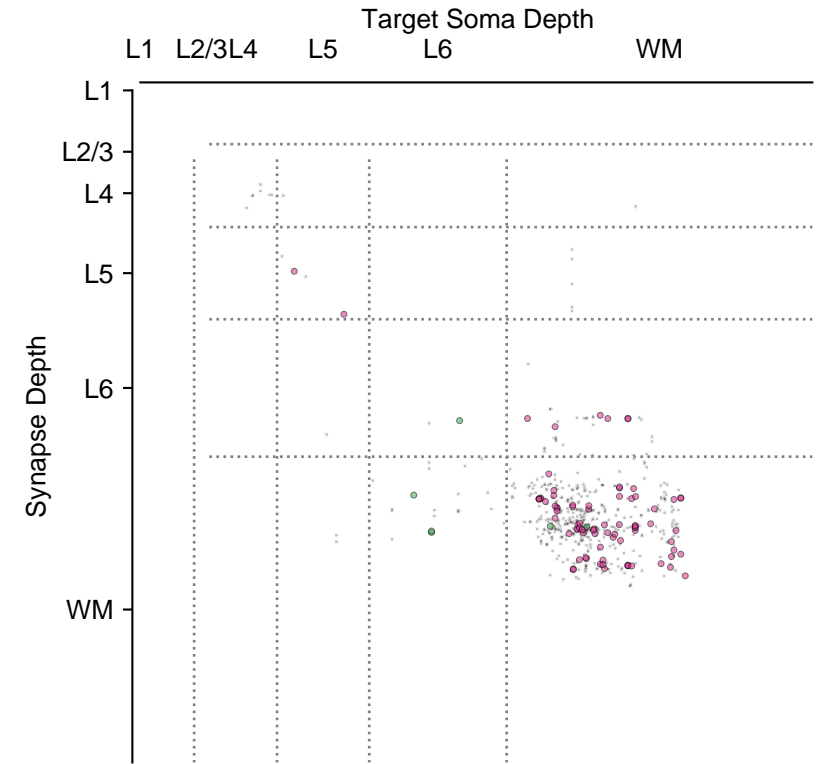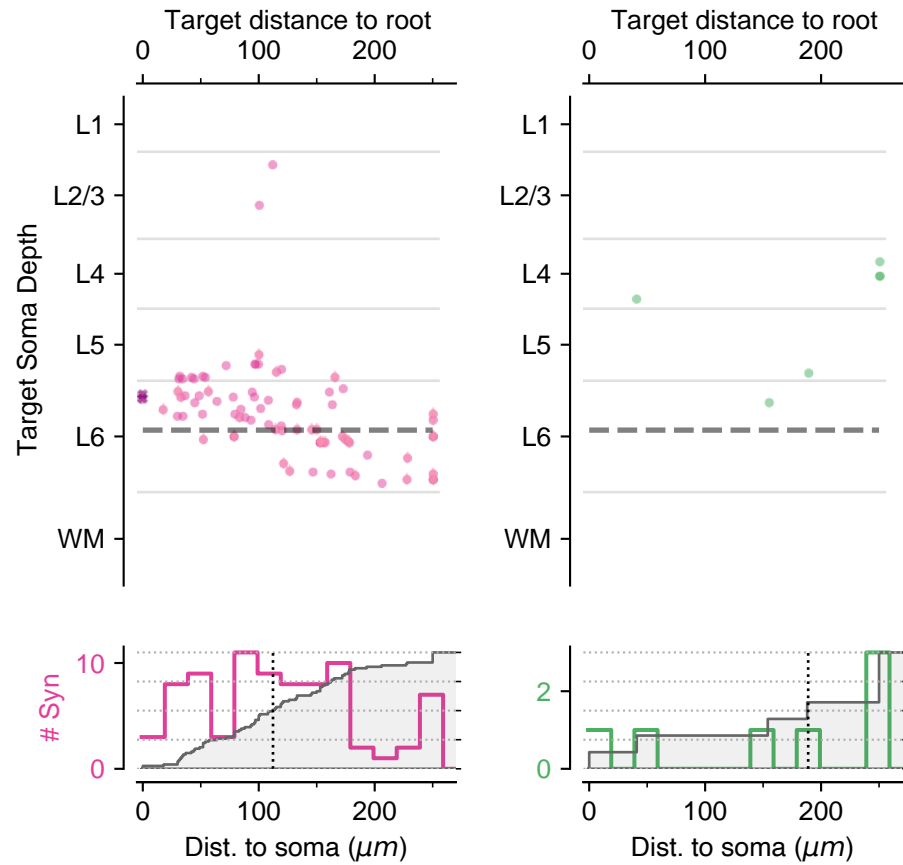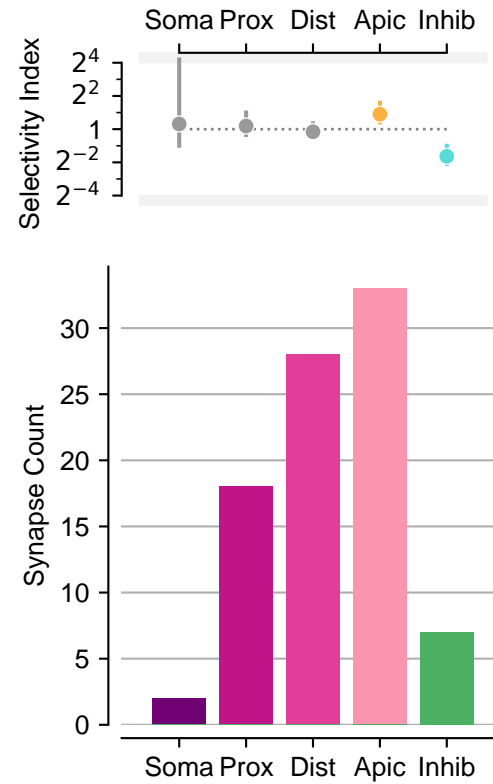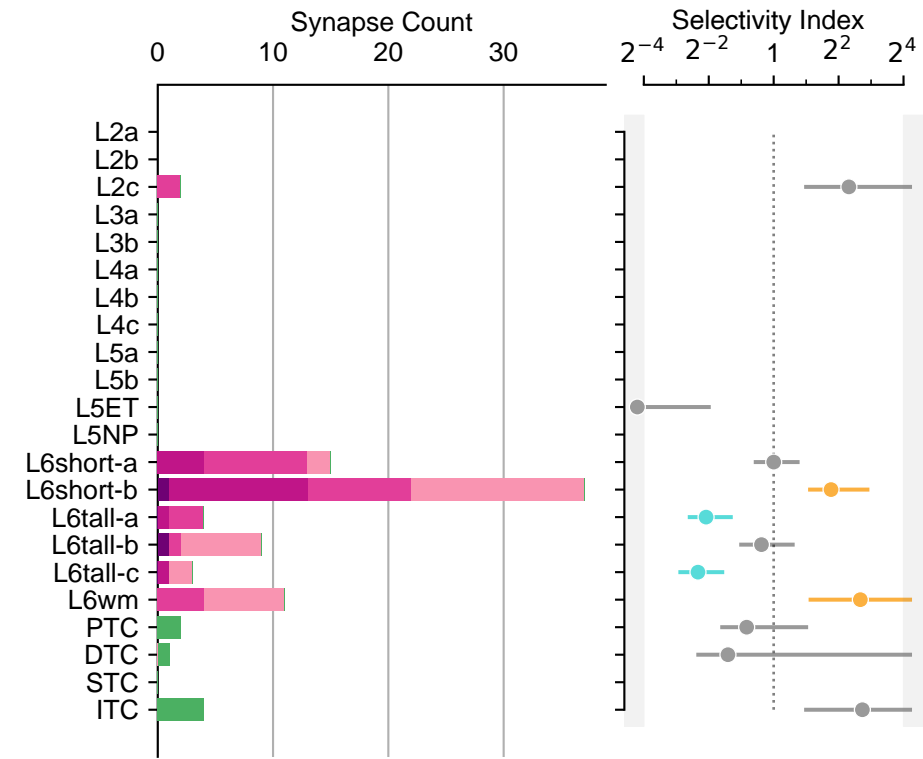

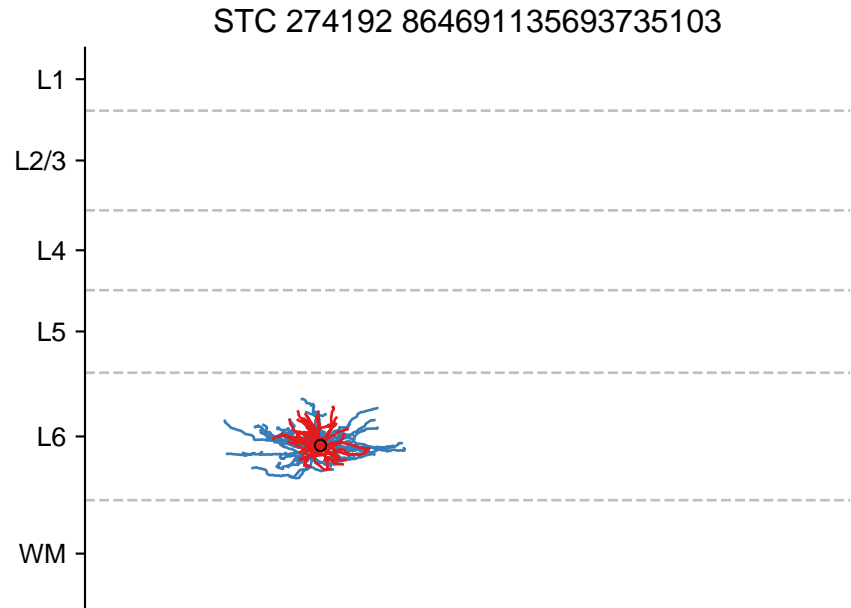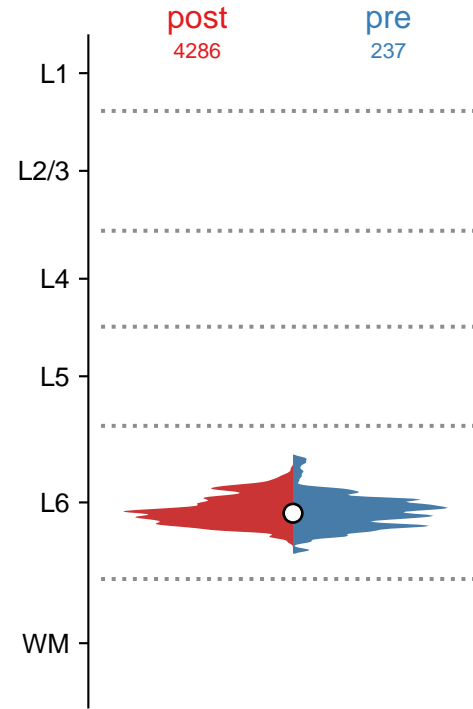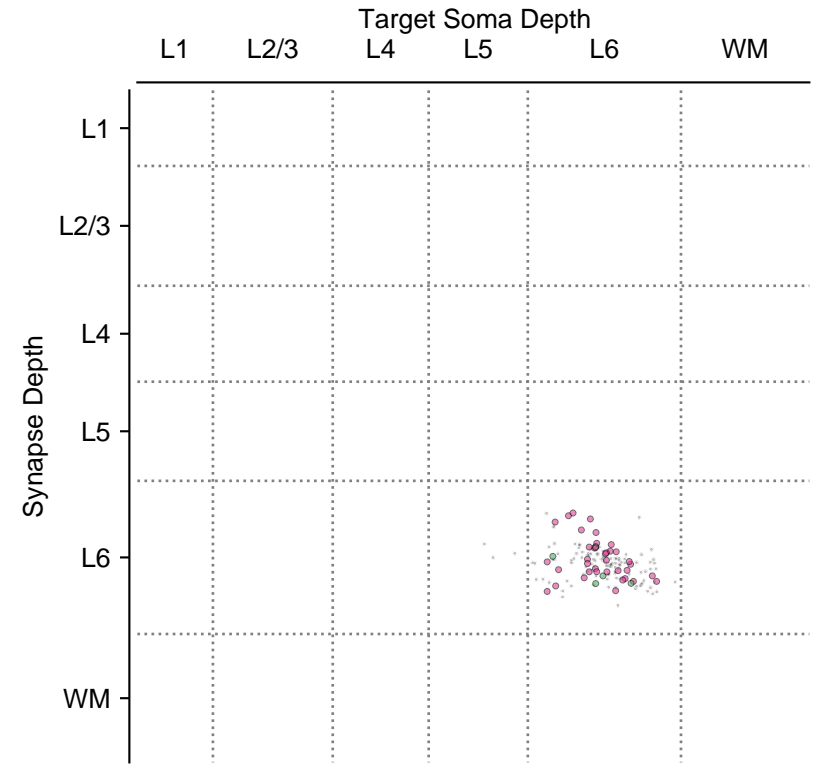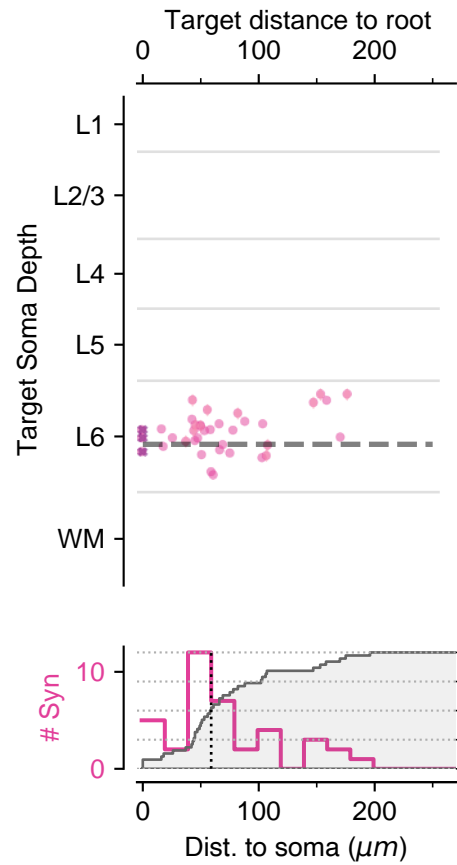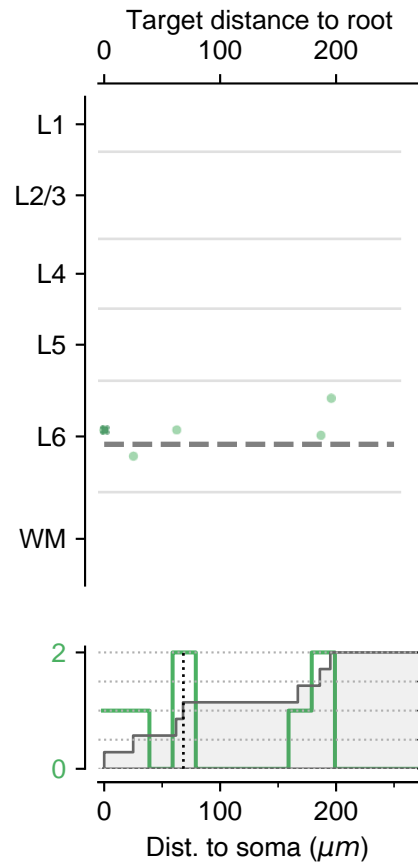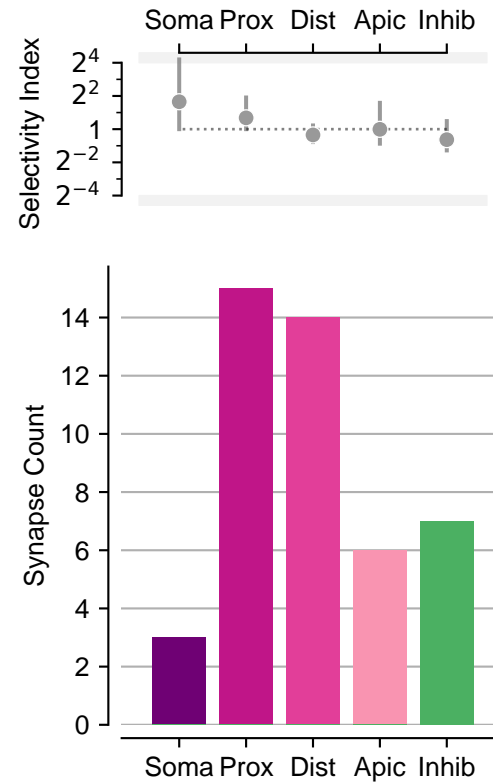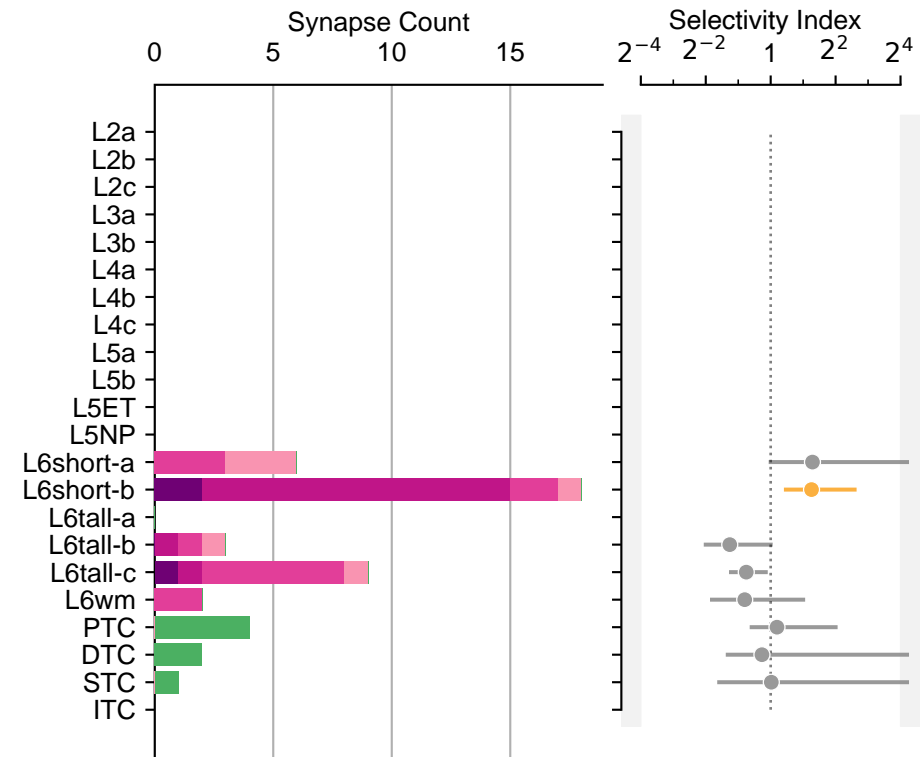



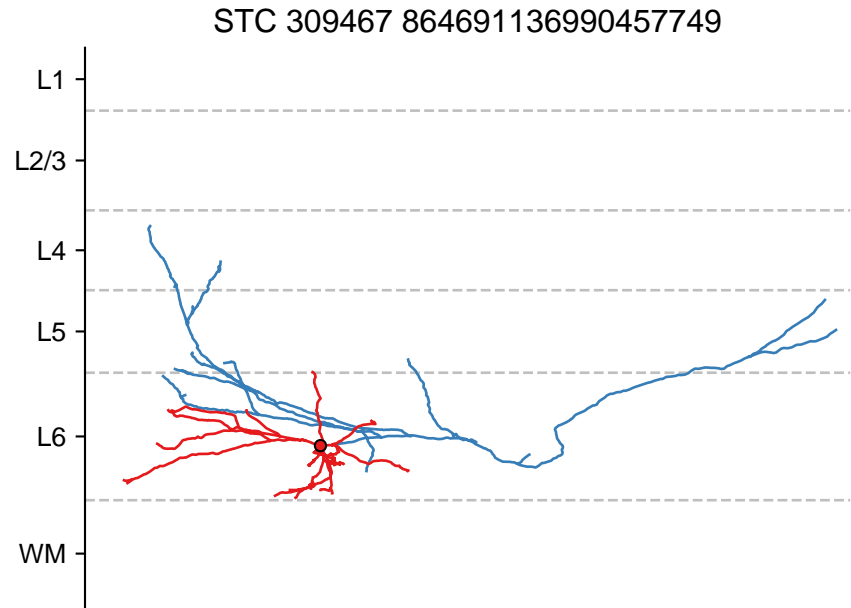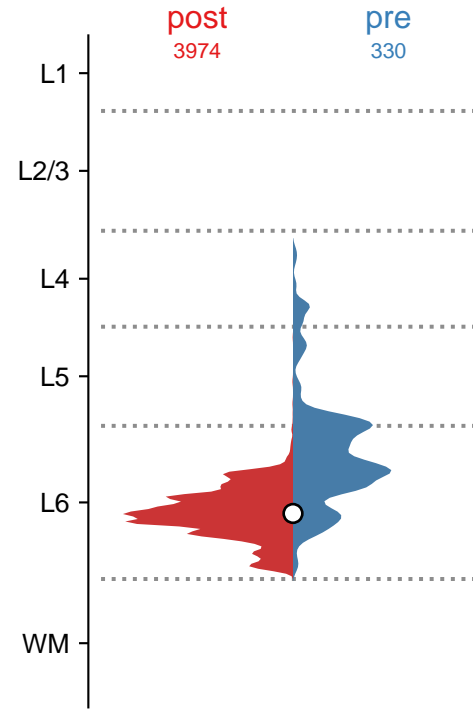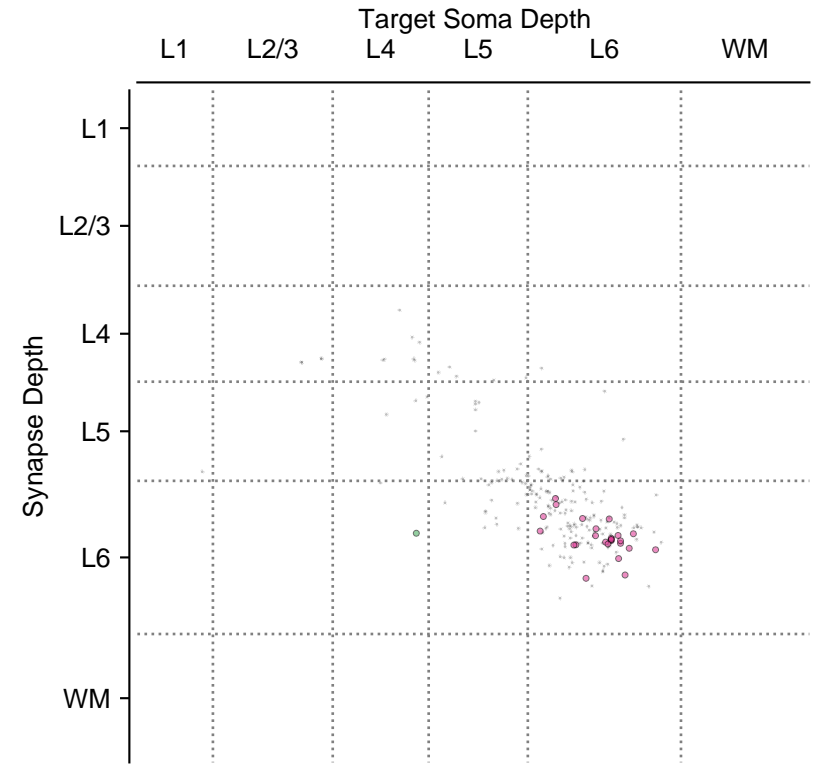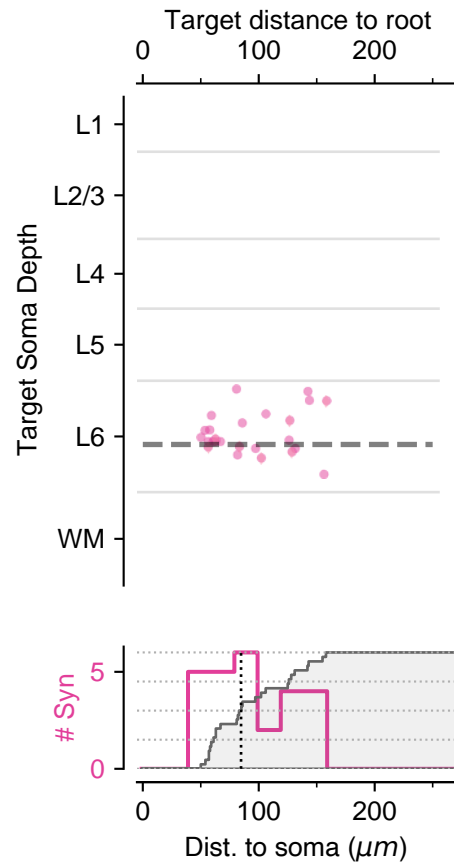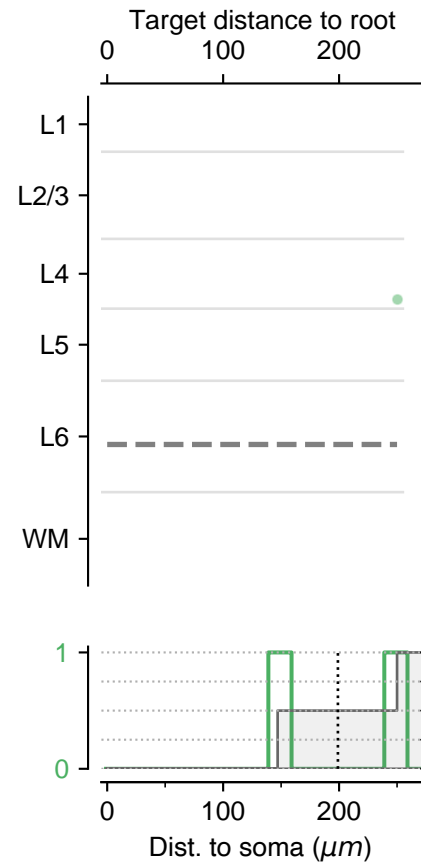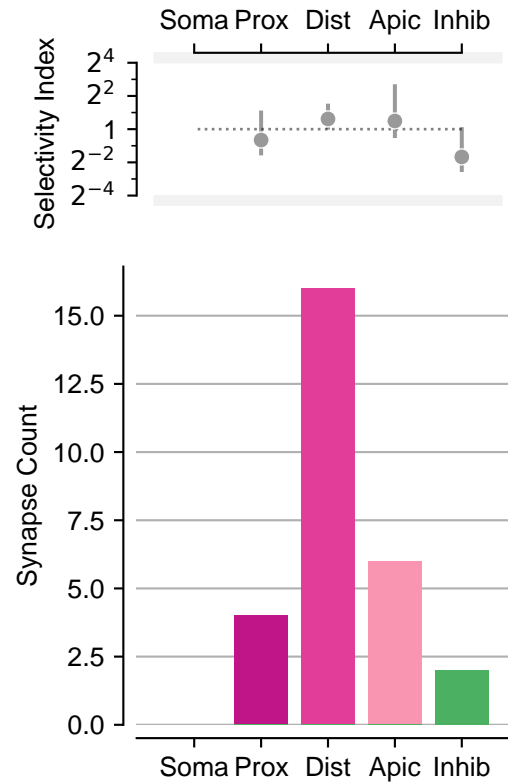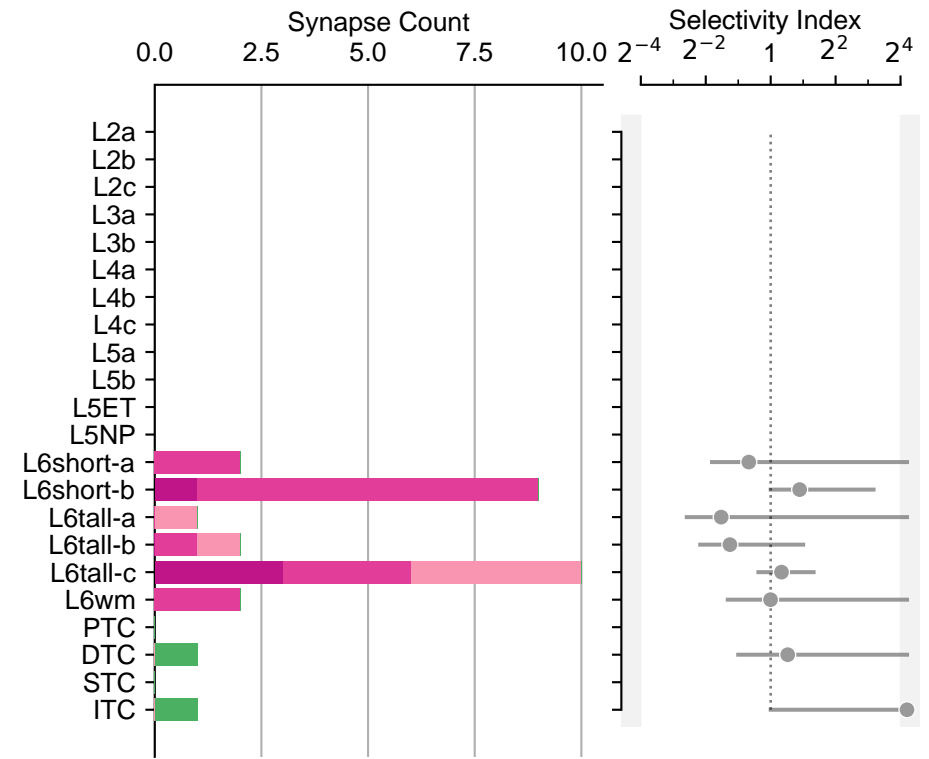

# Motif Group 16

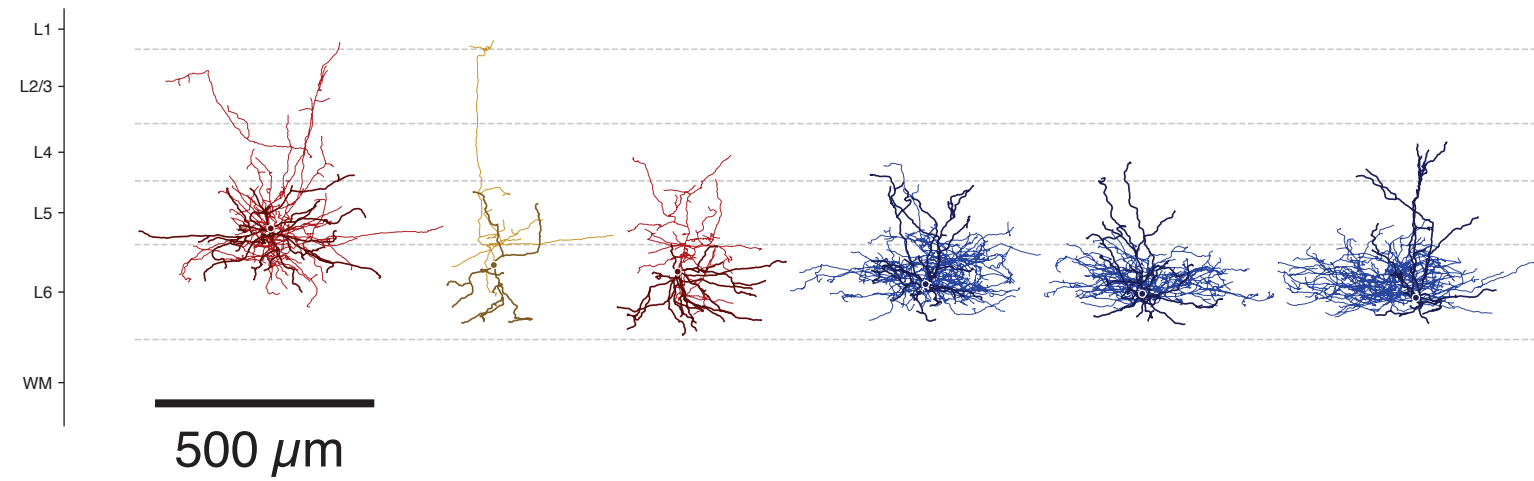

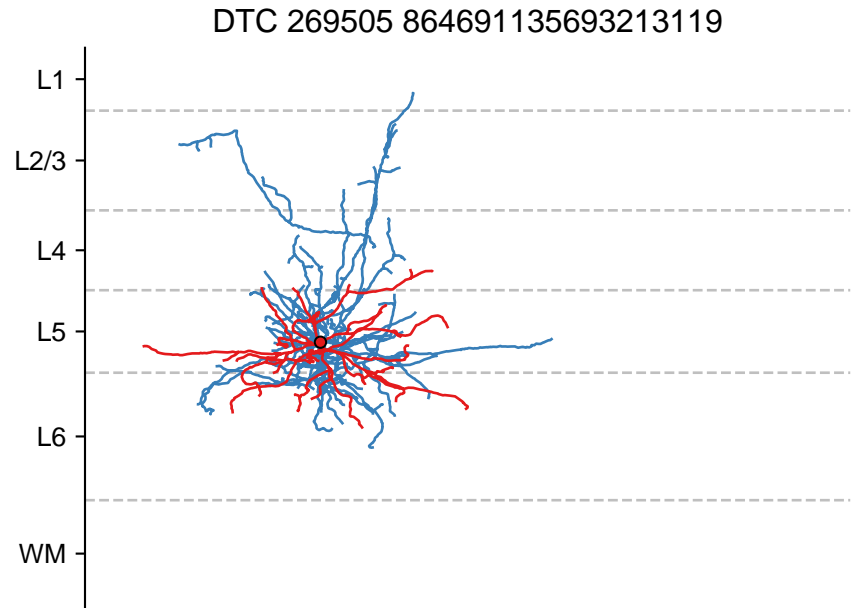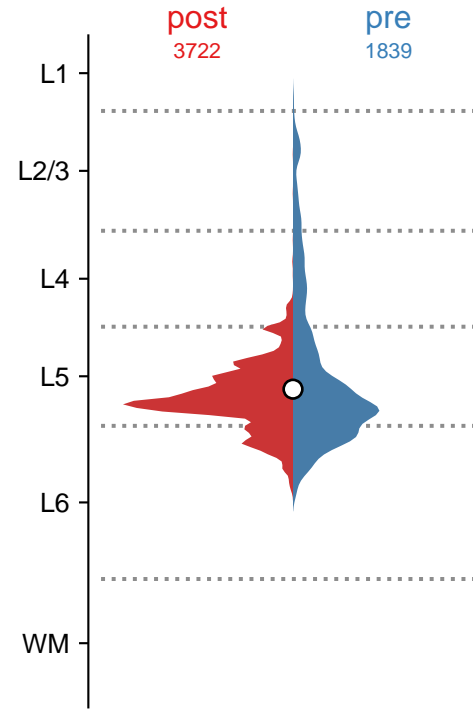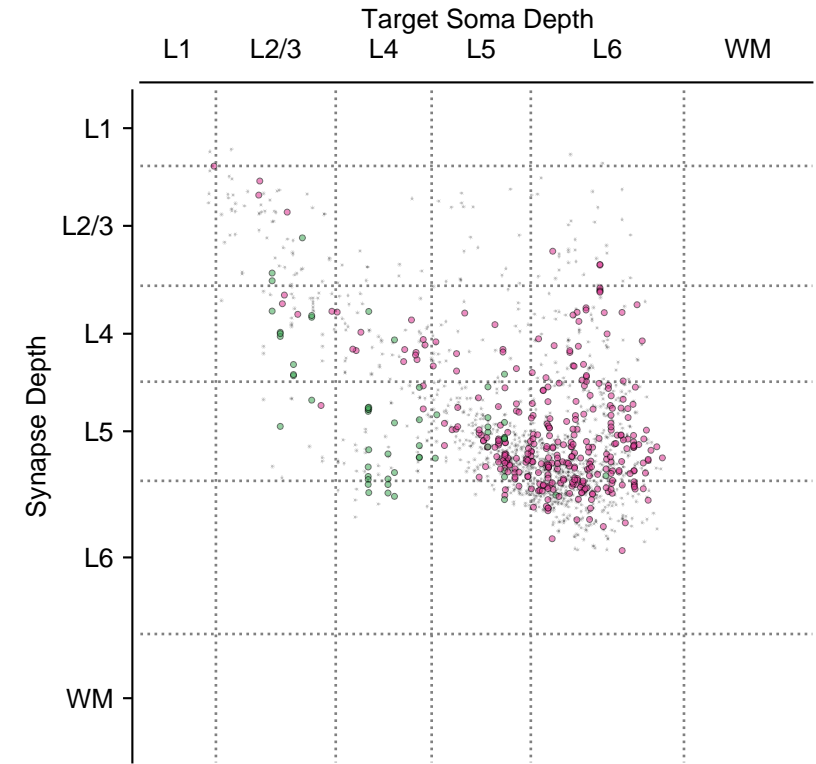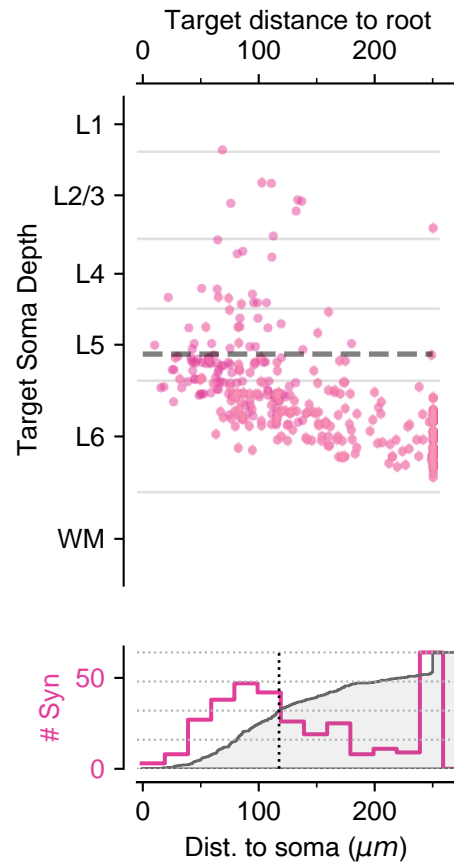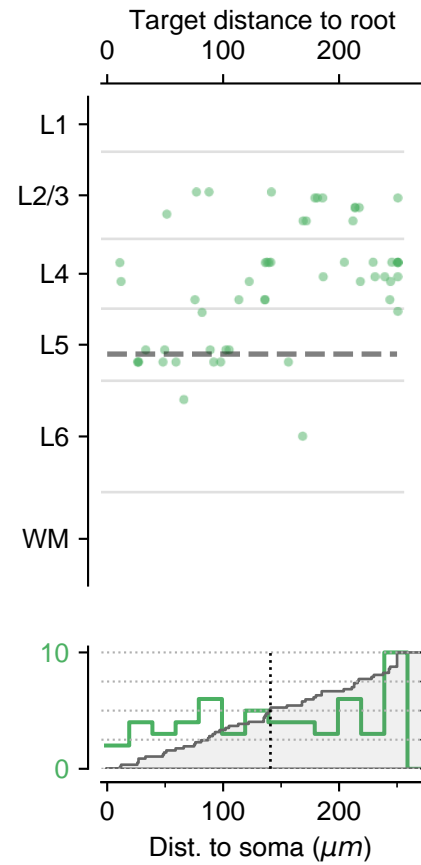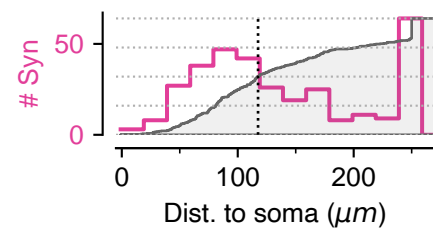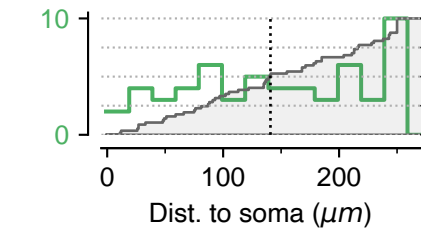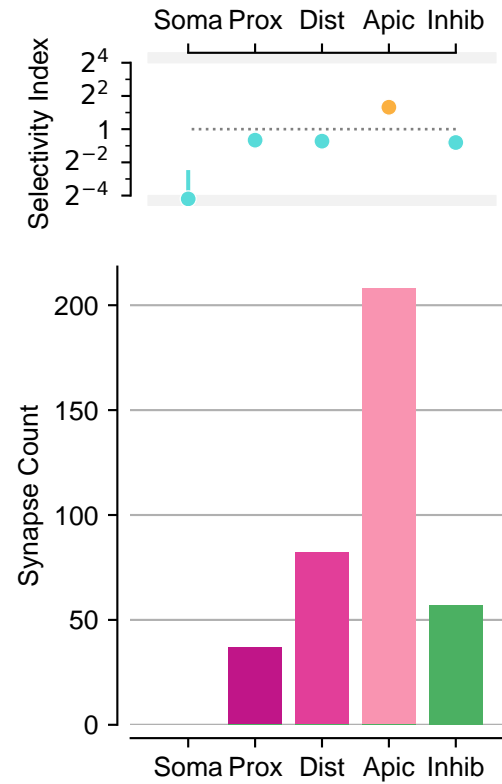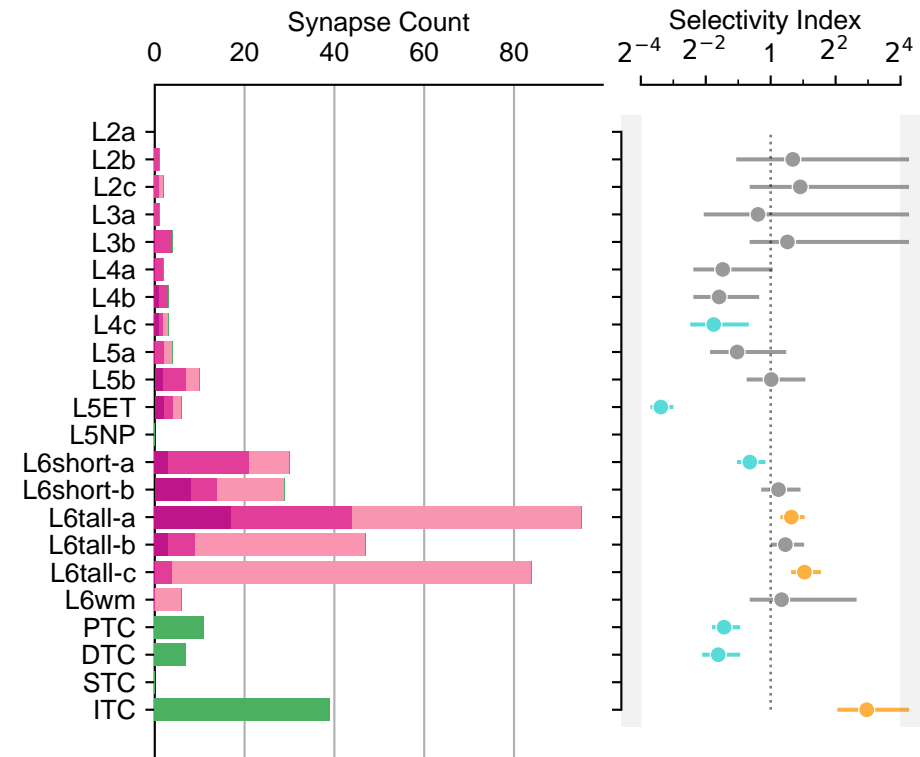

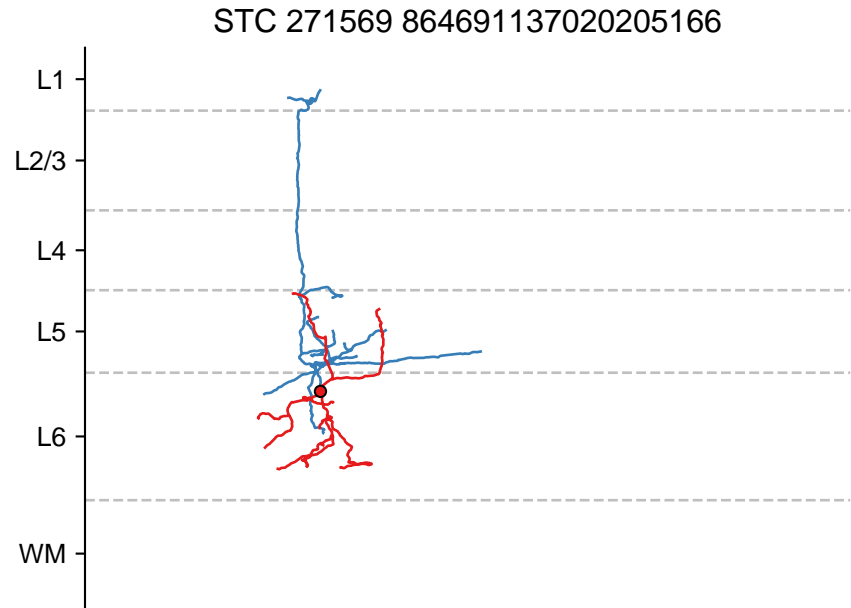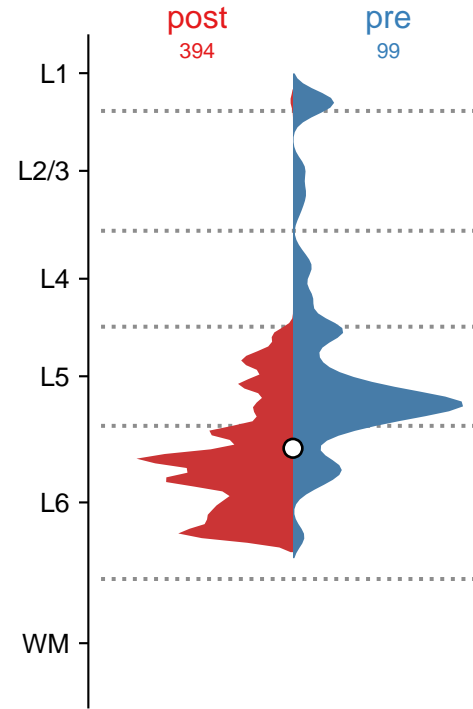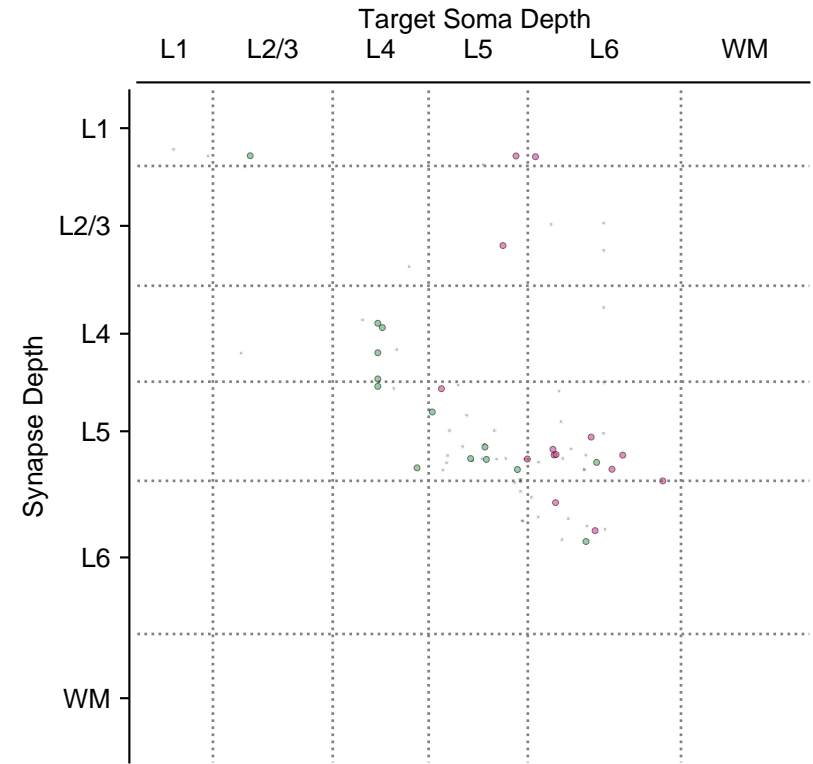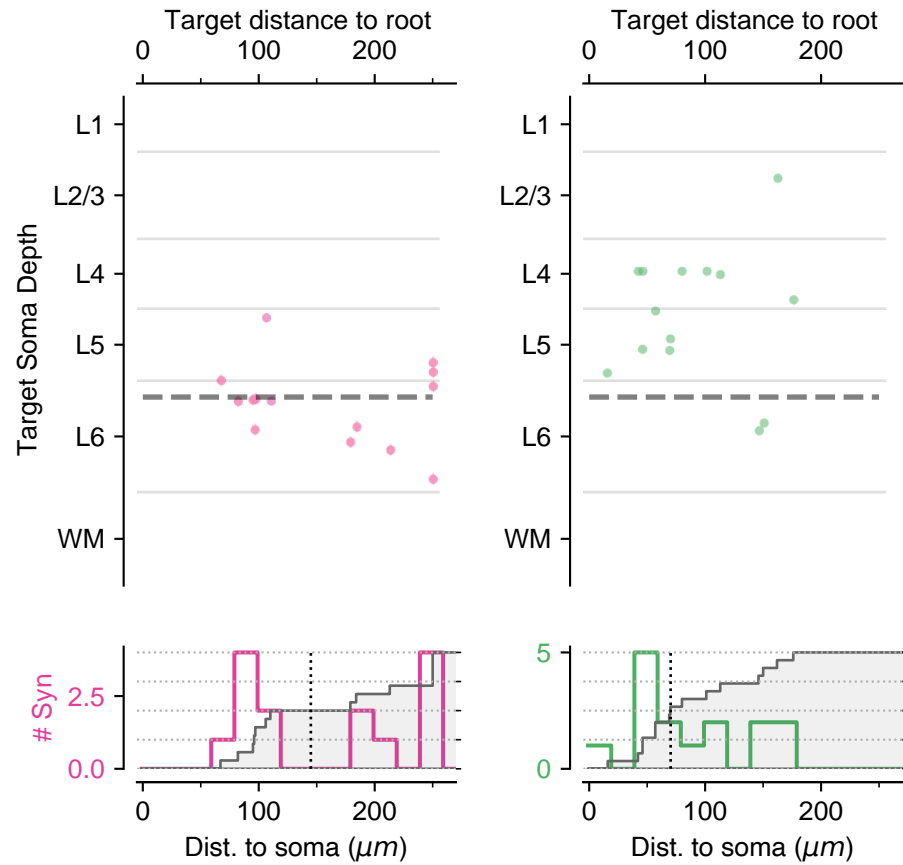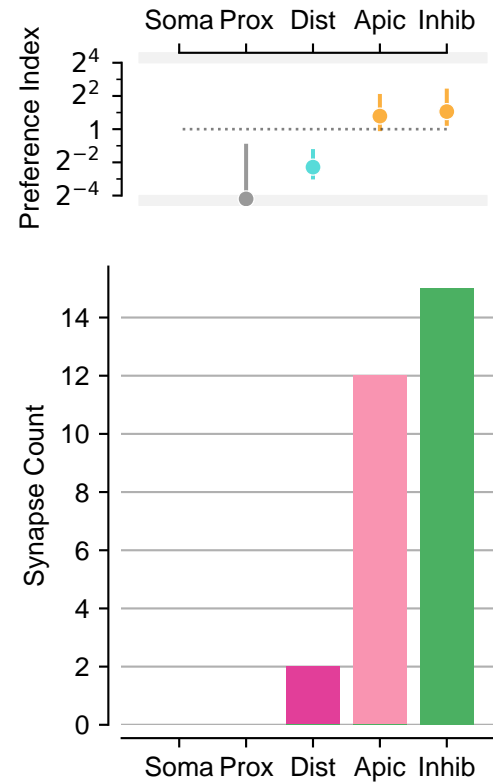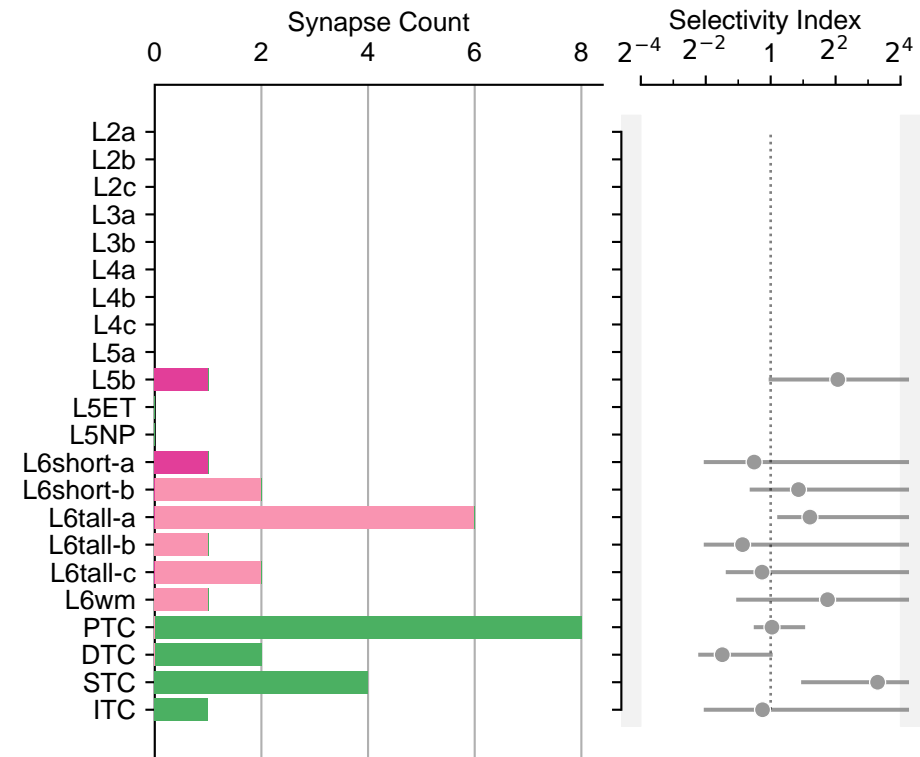

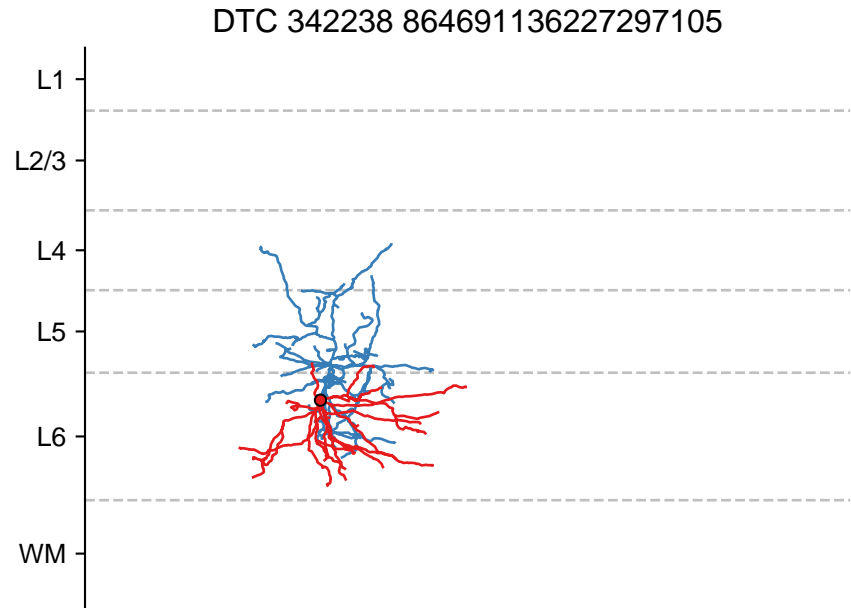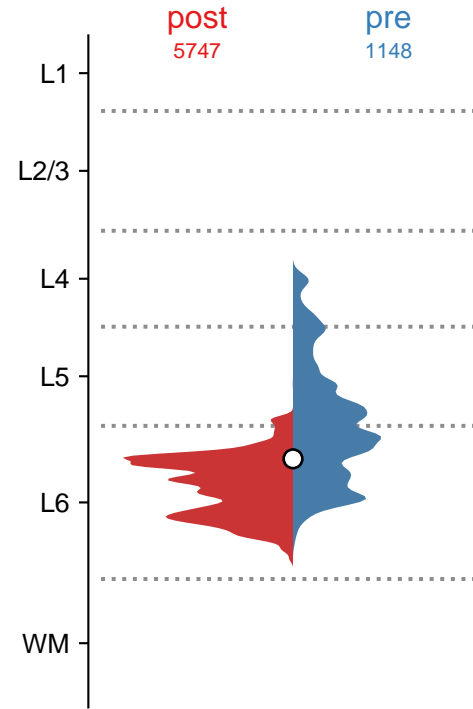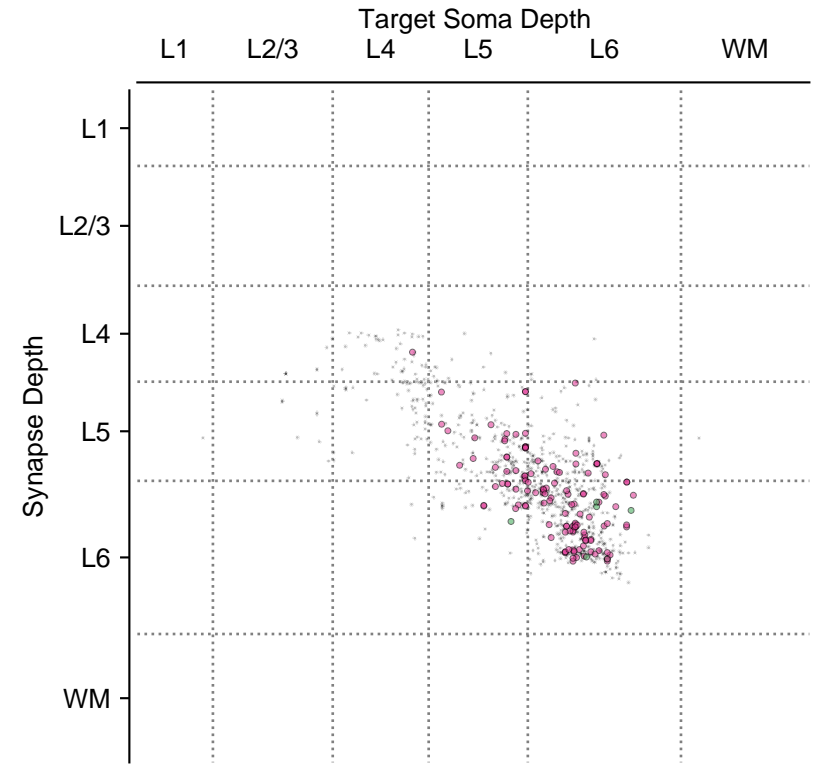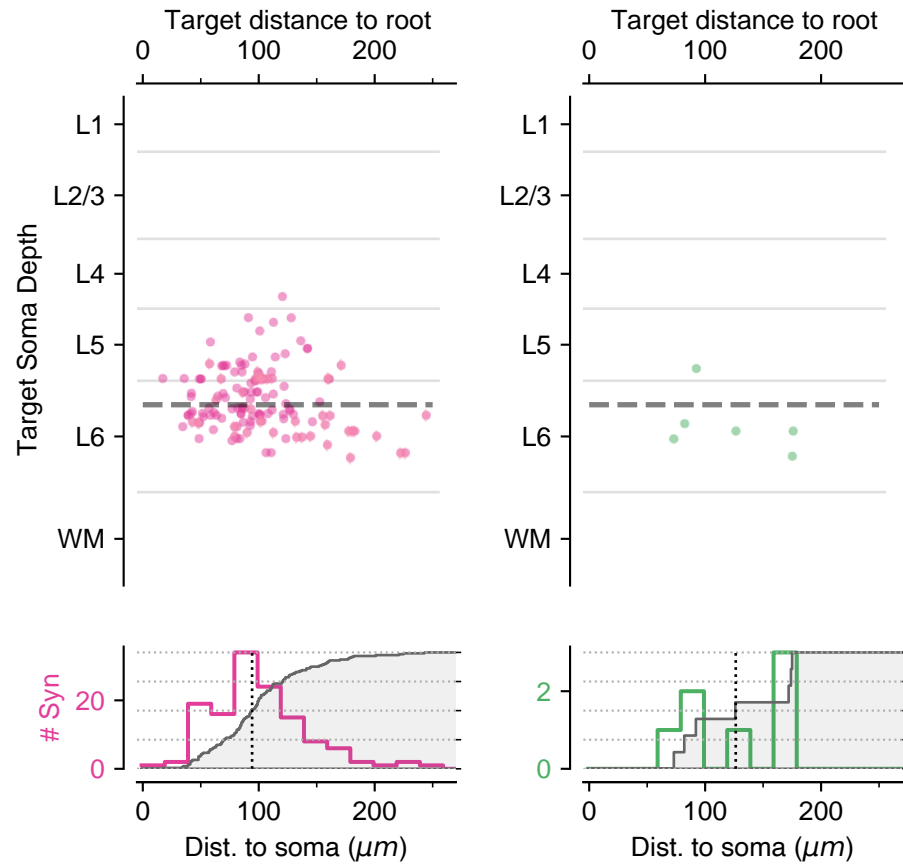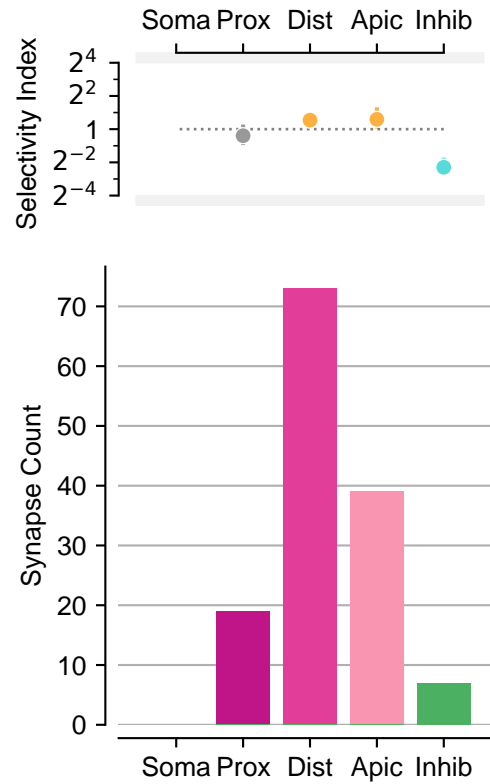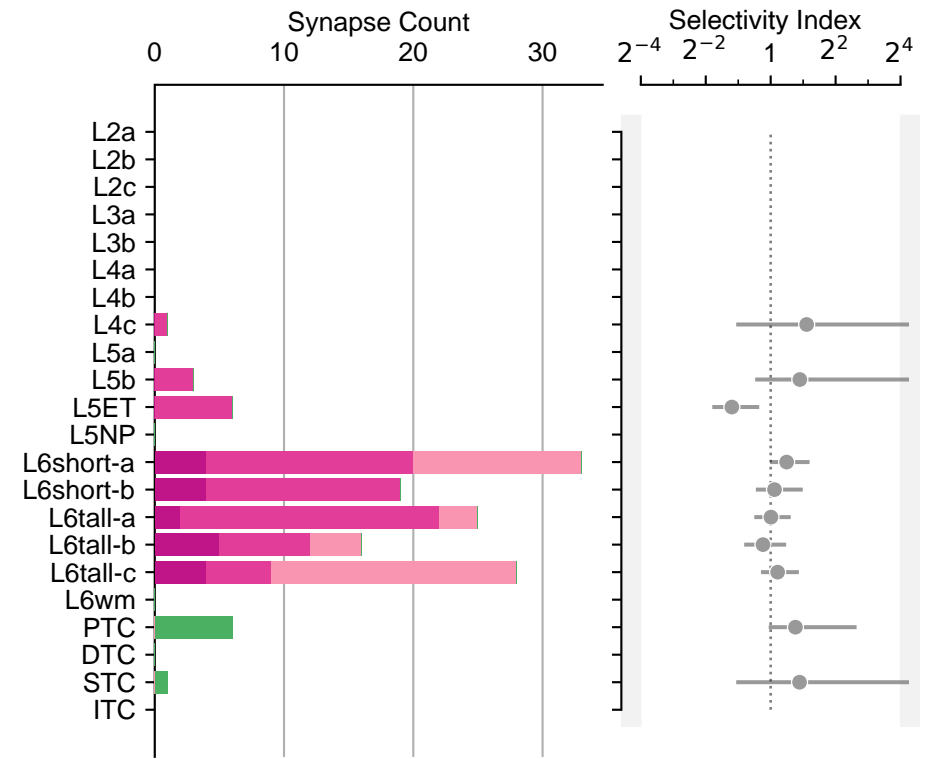

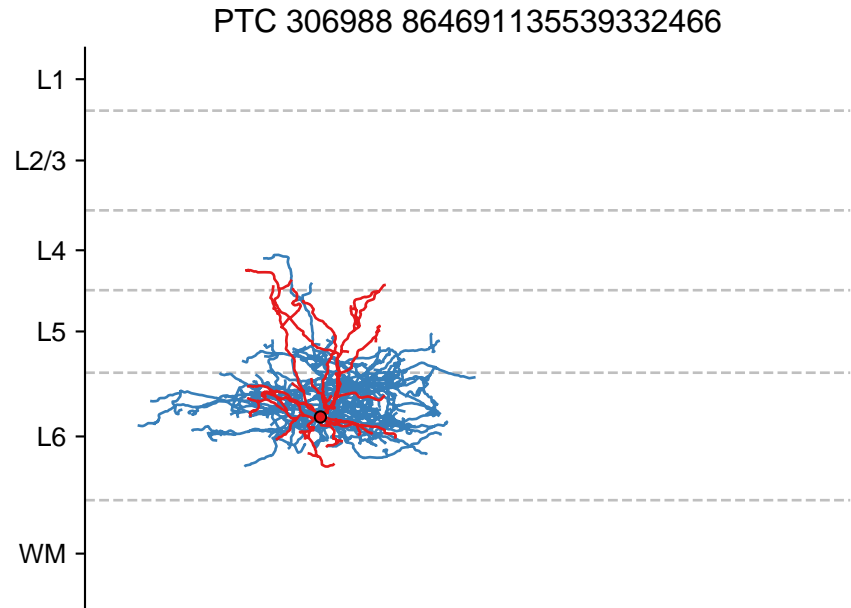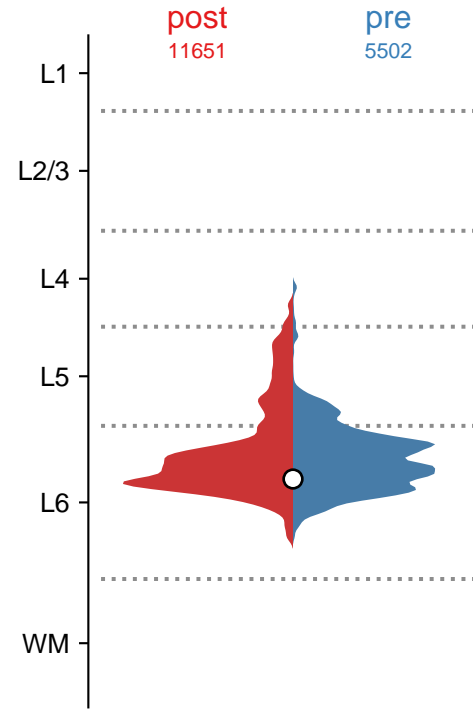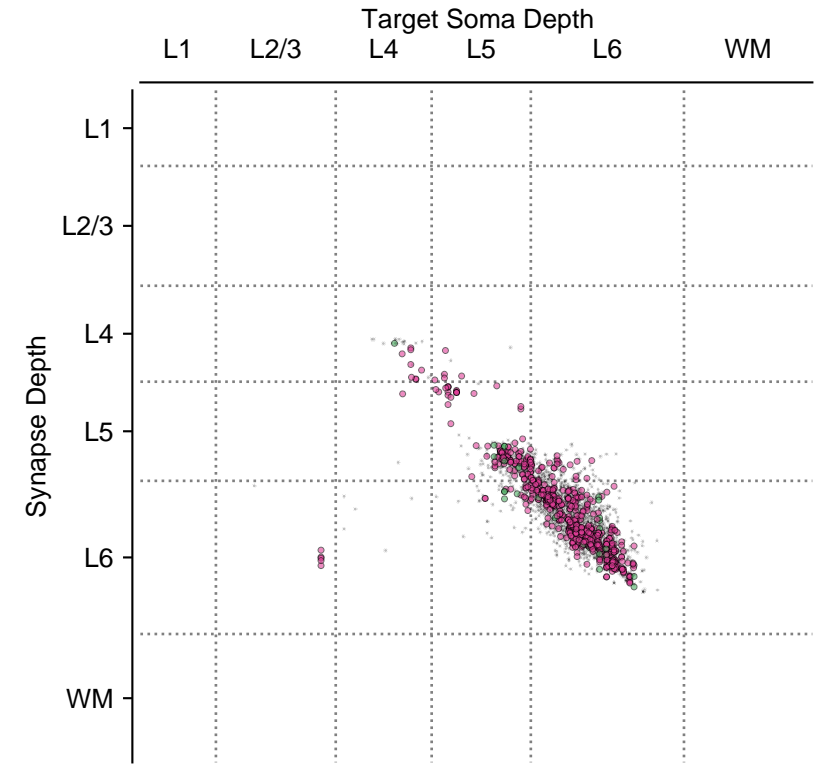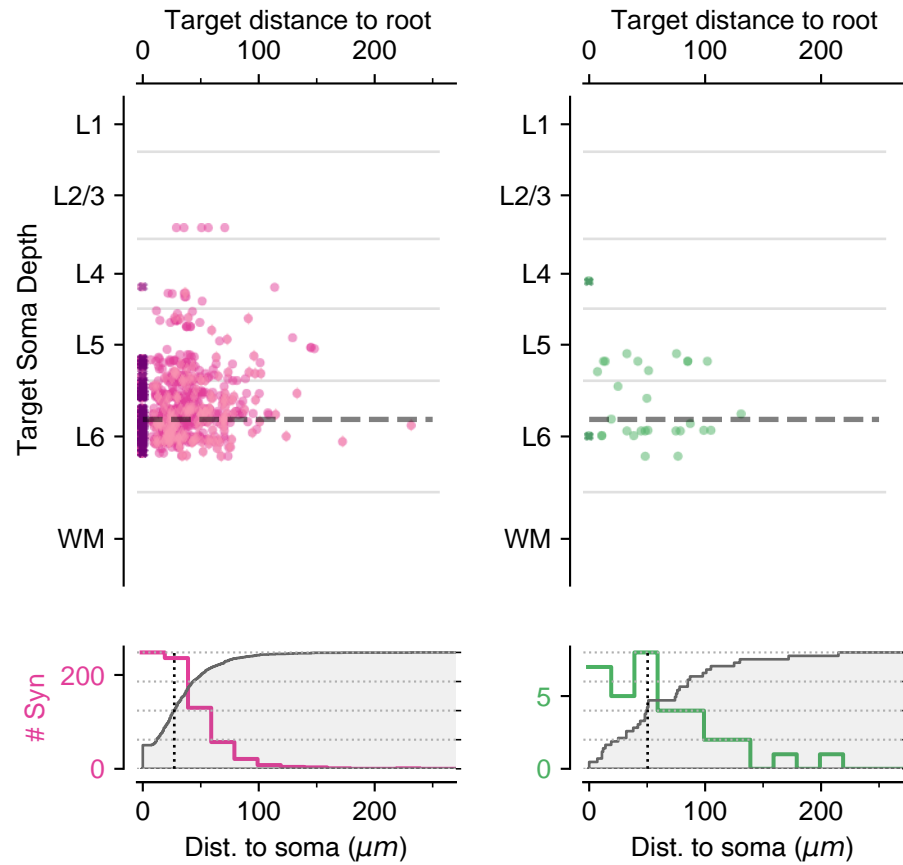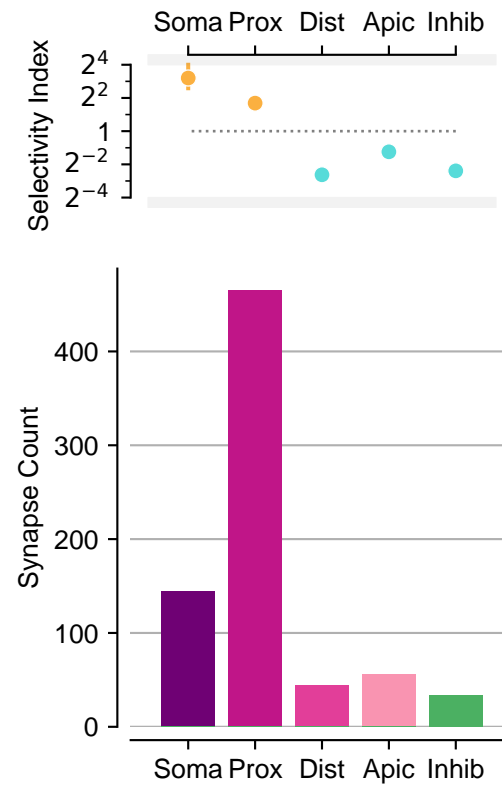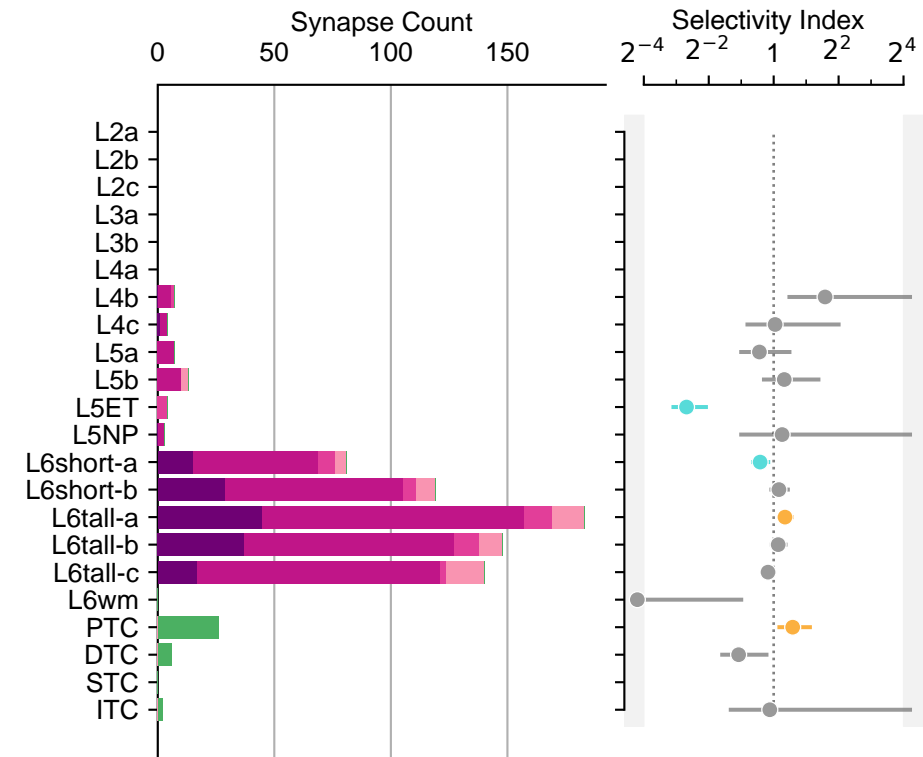

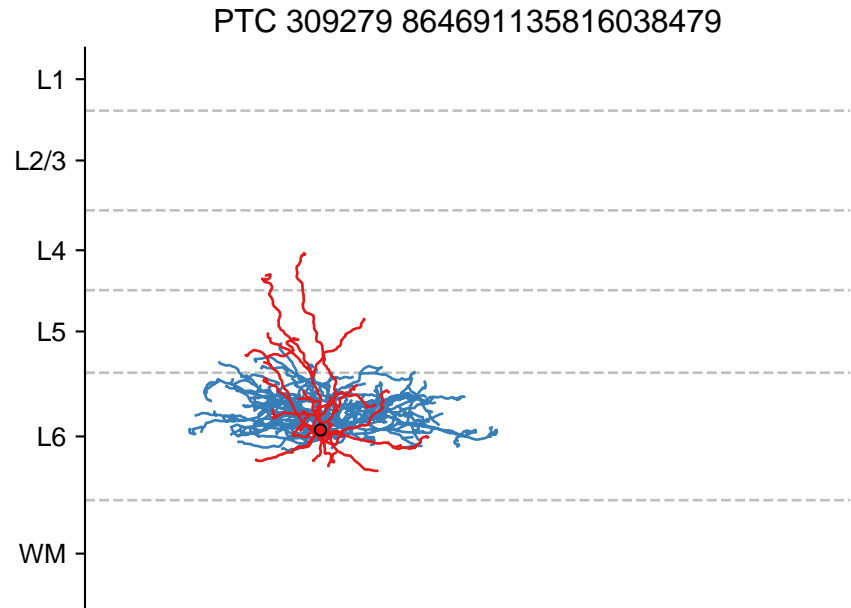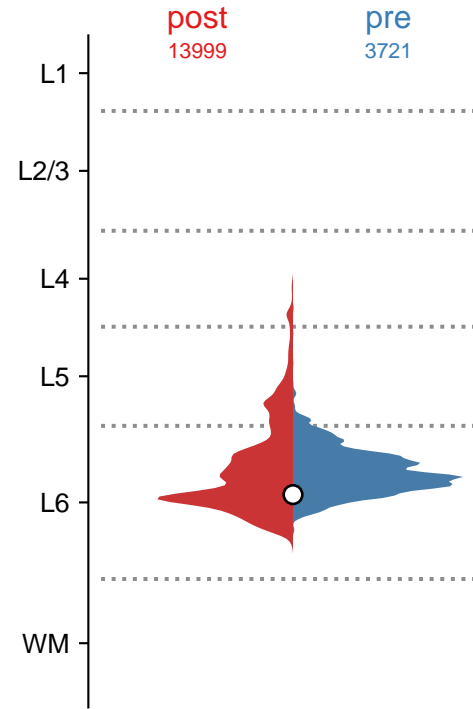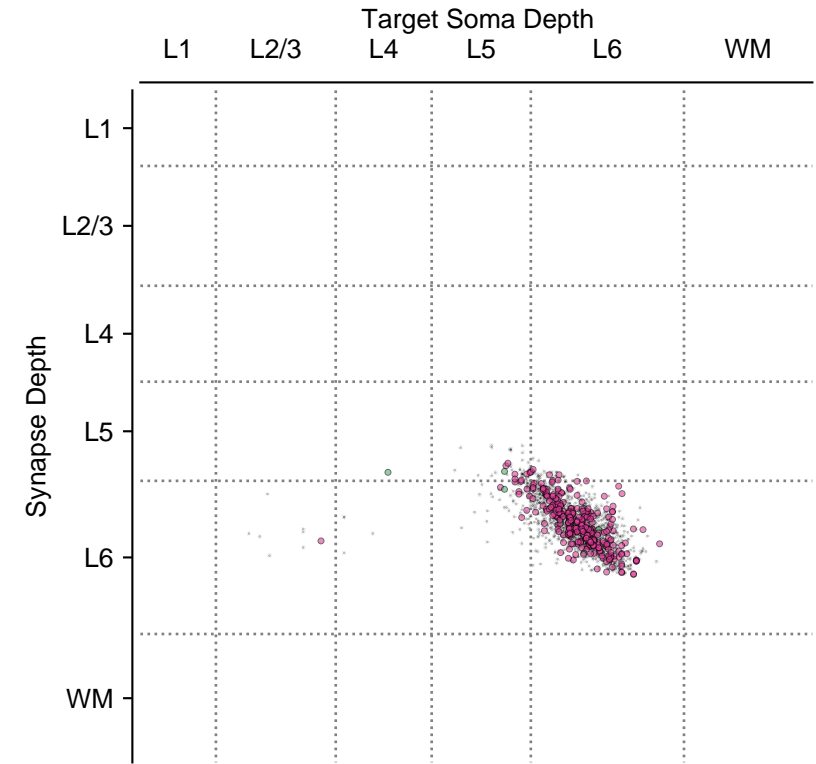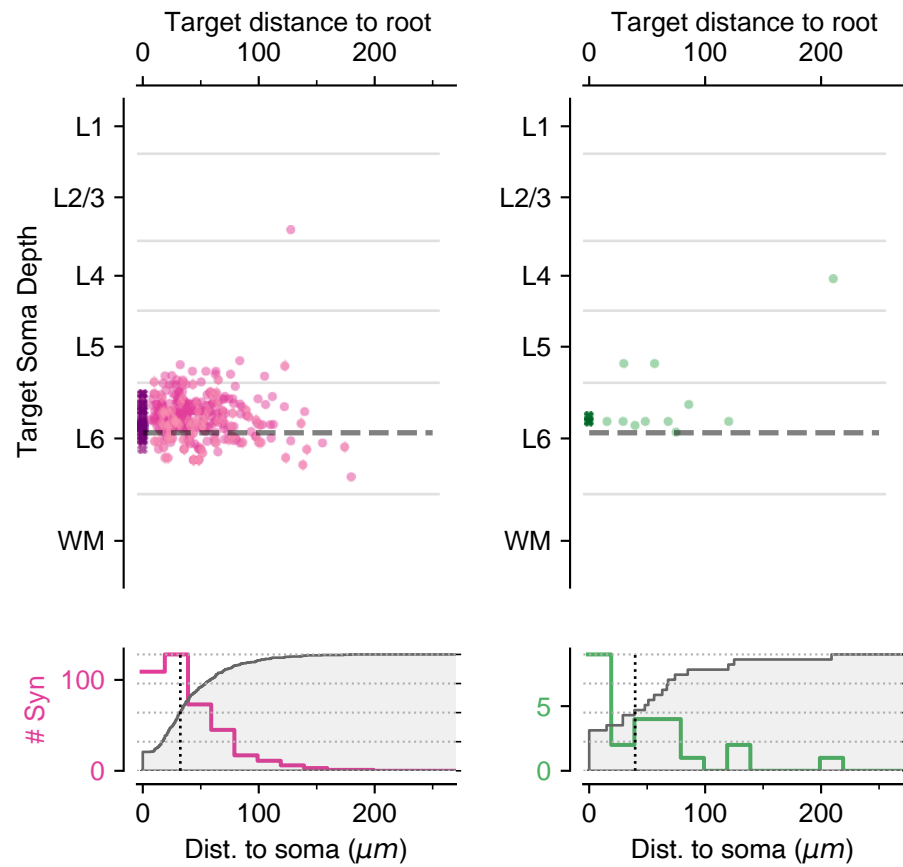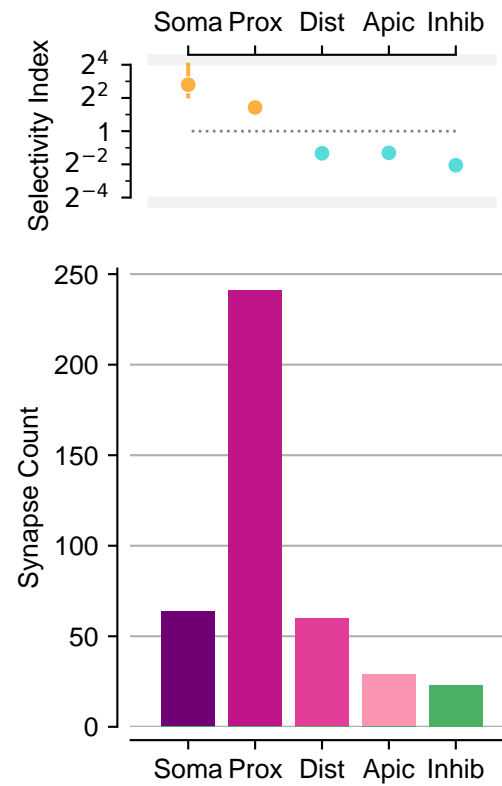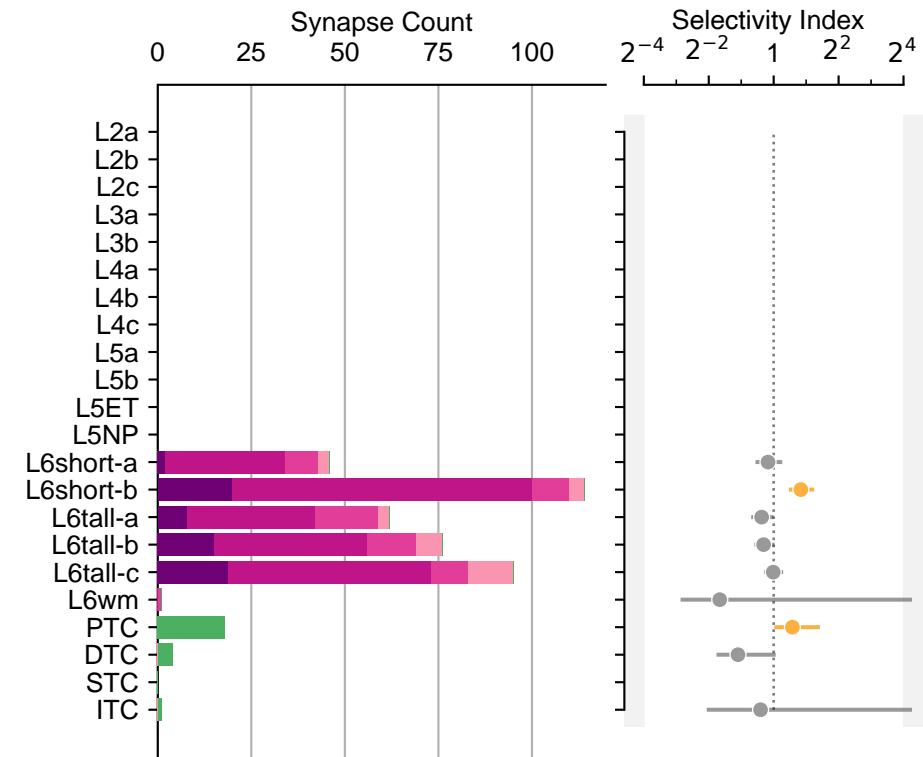

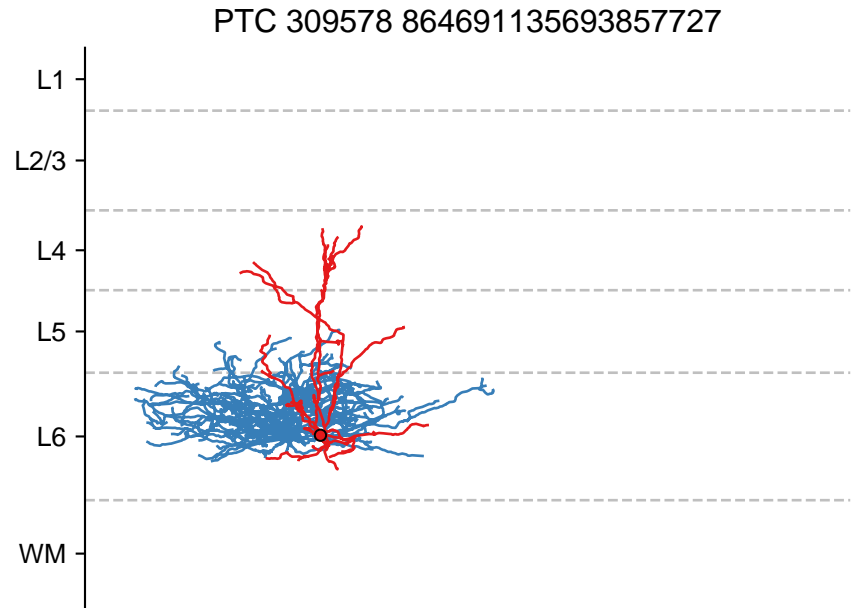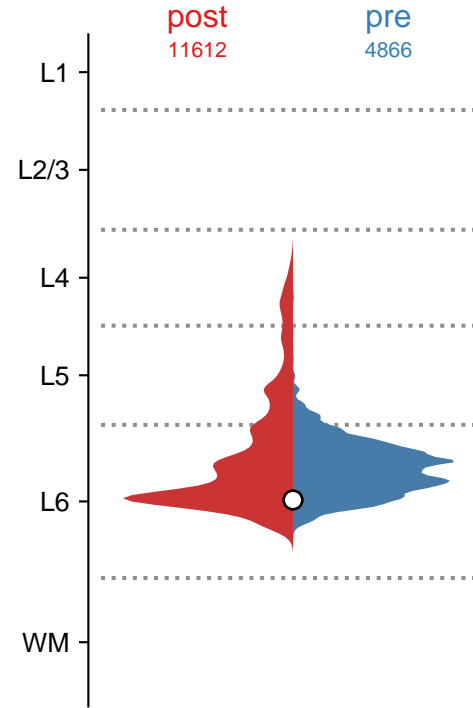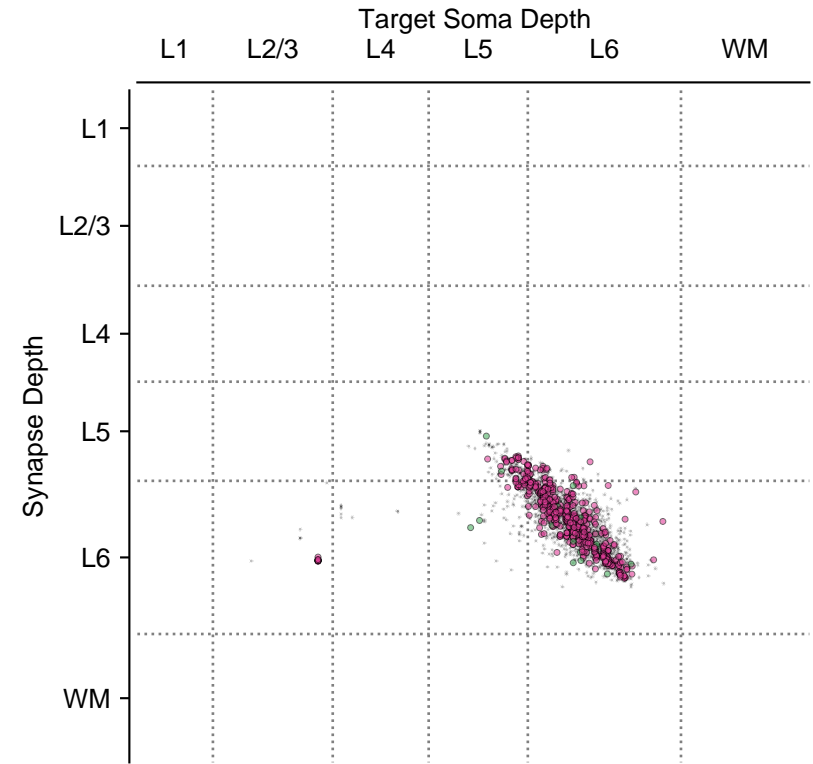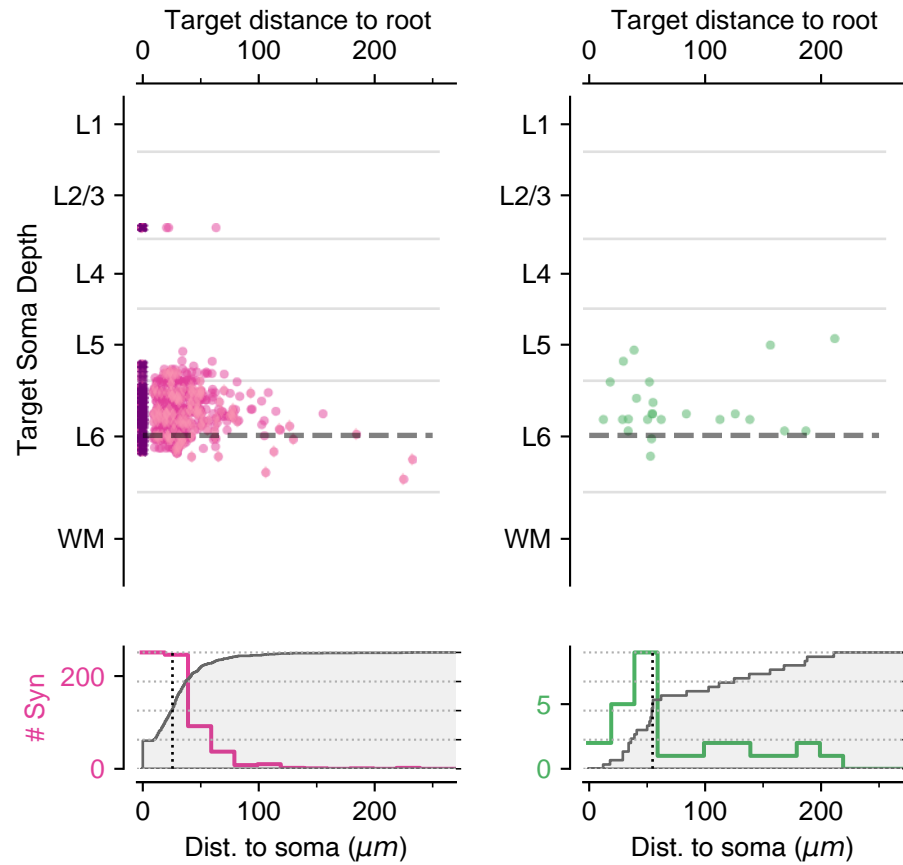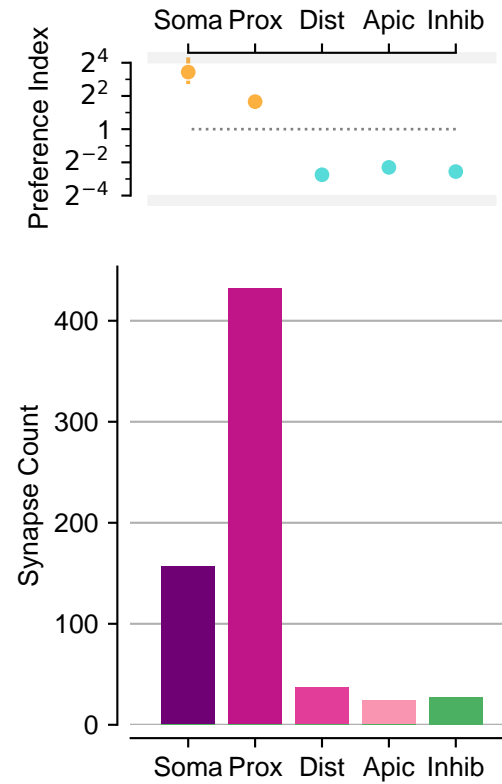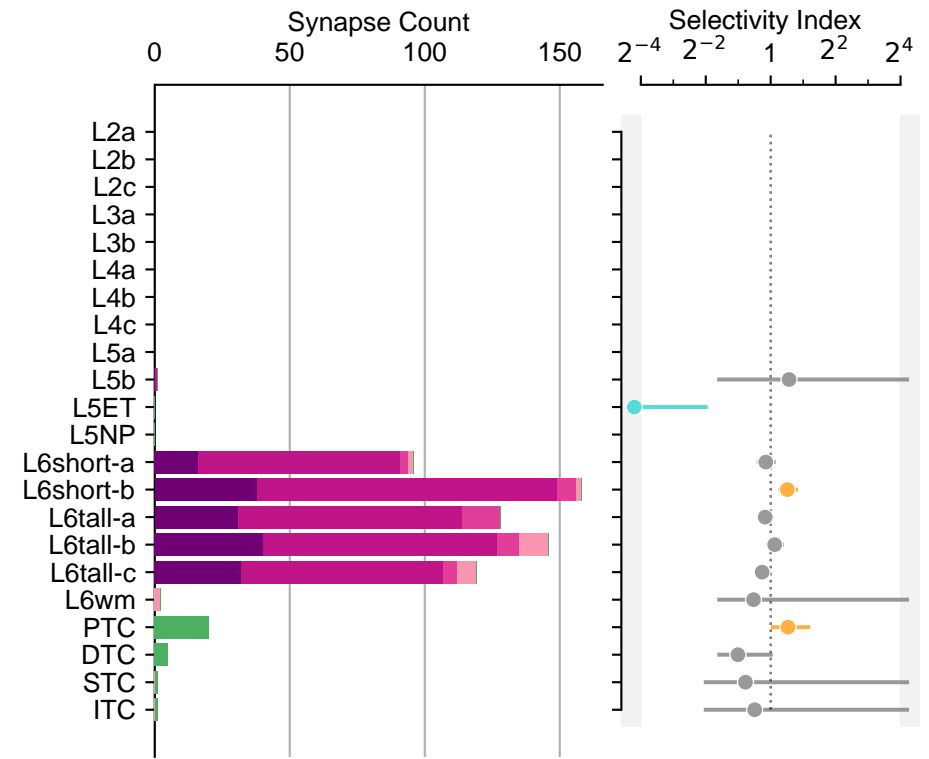



# Motif Group 17

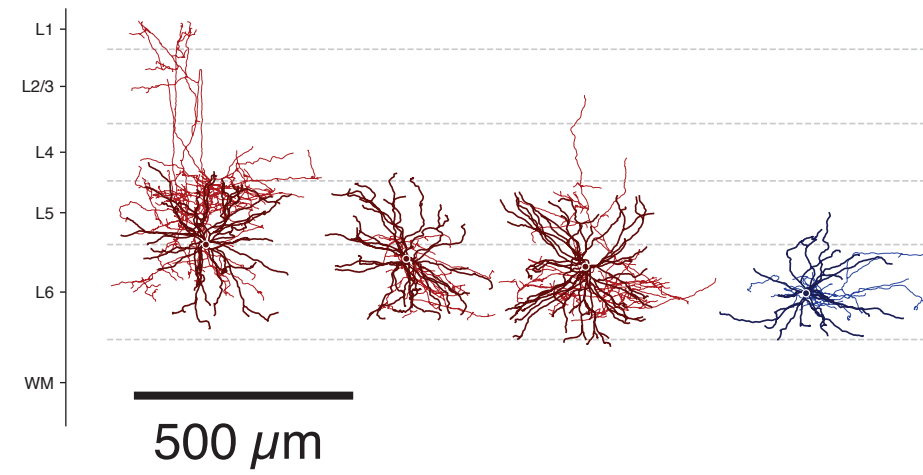

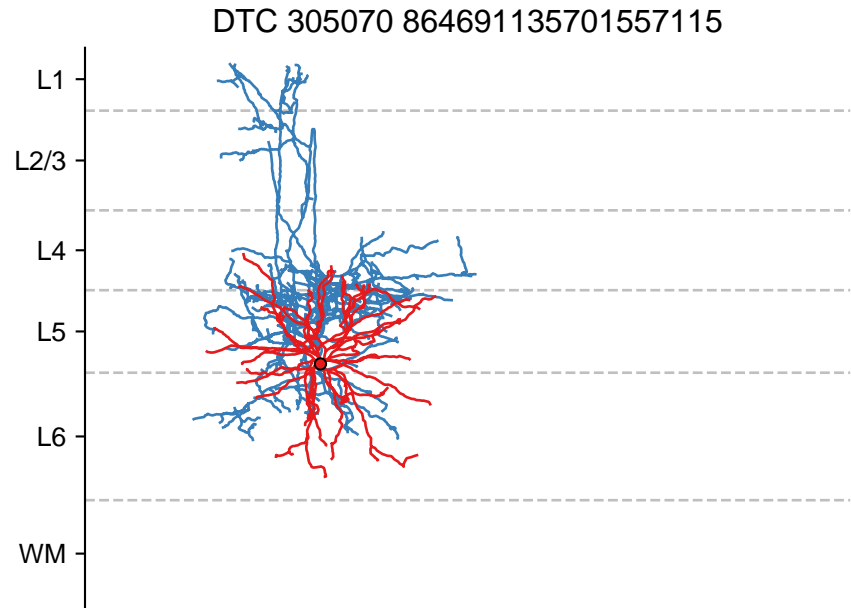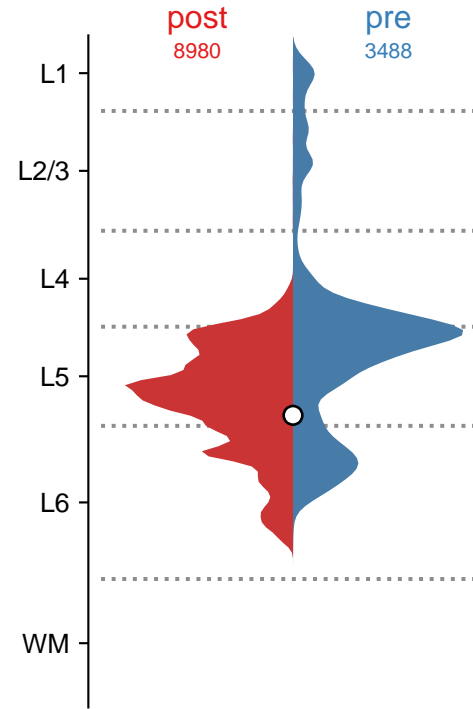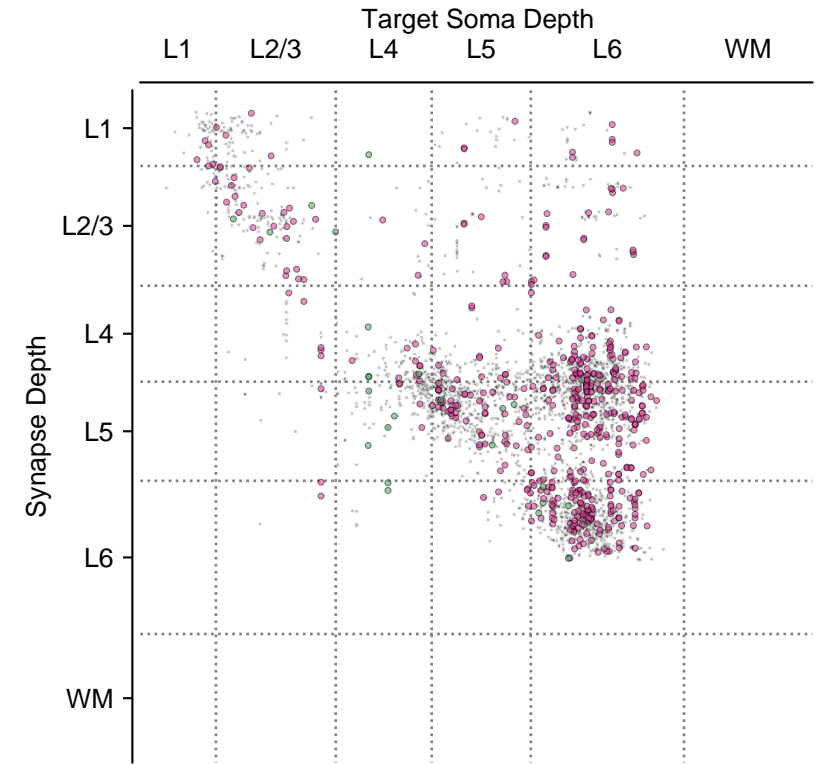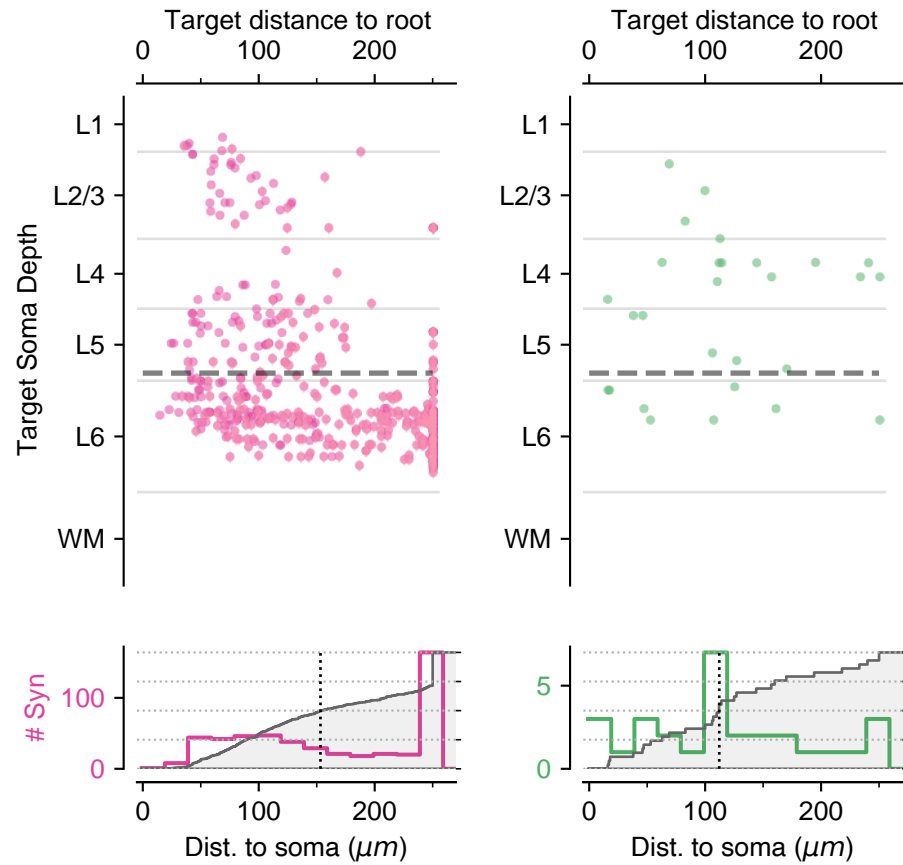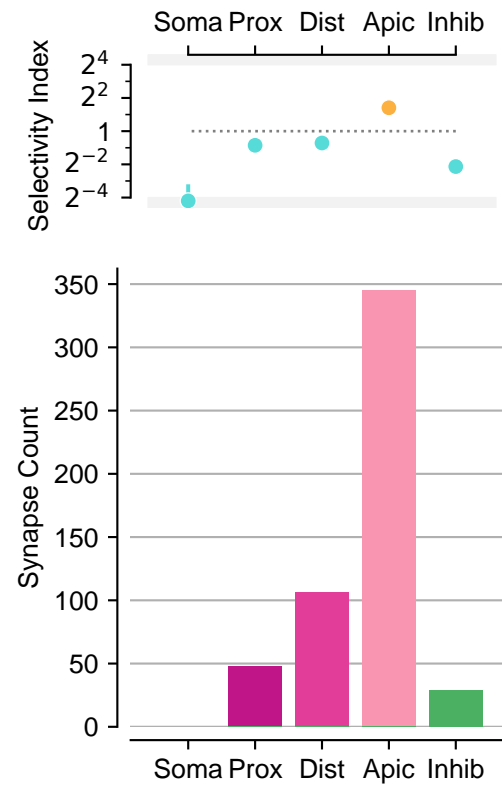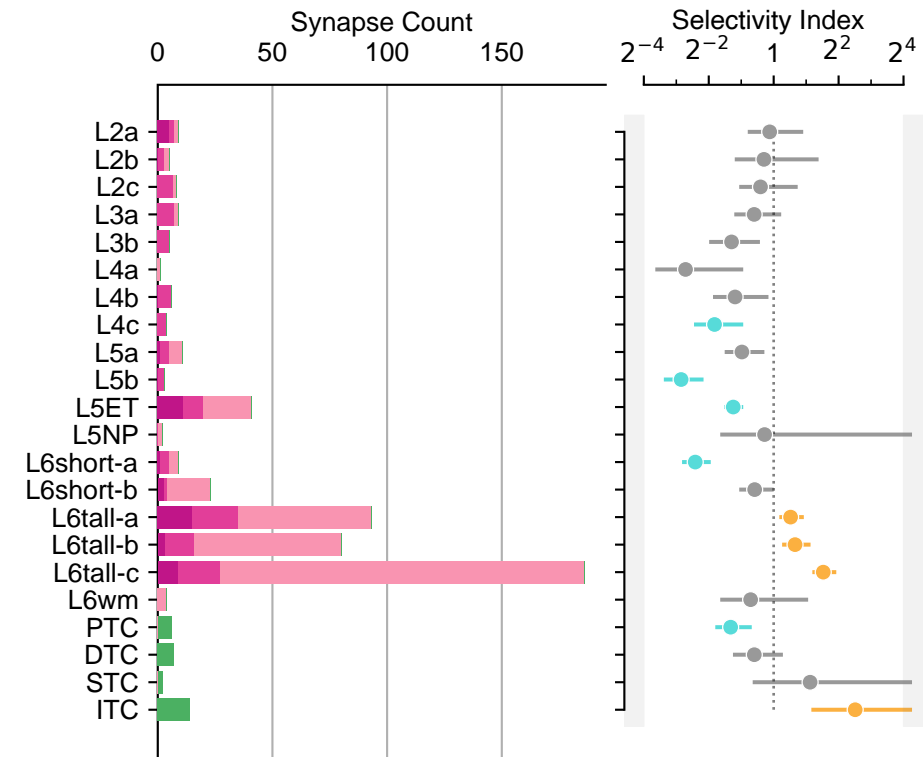

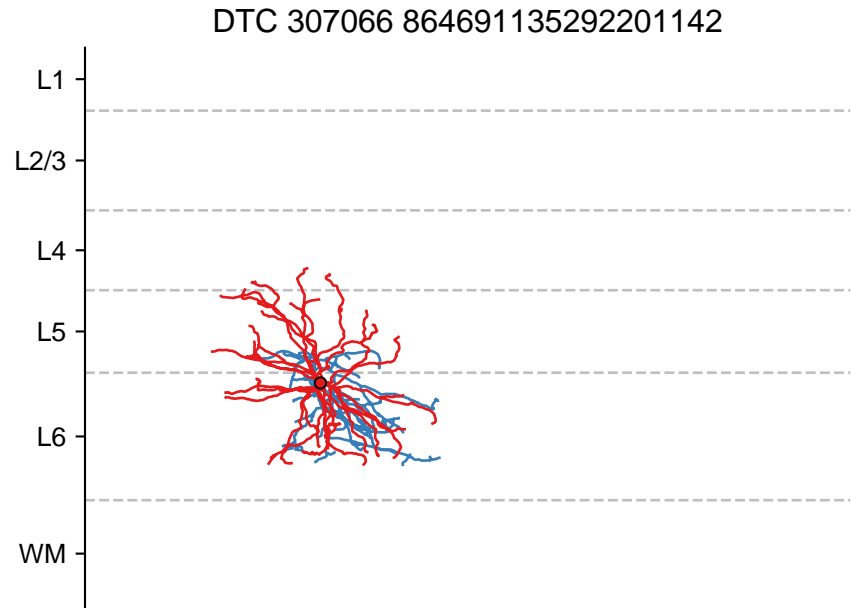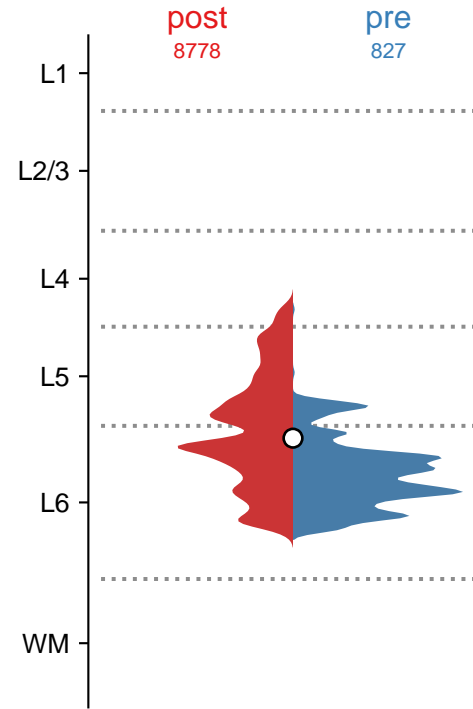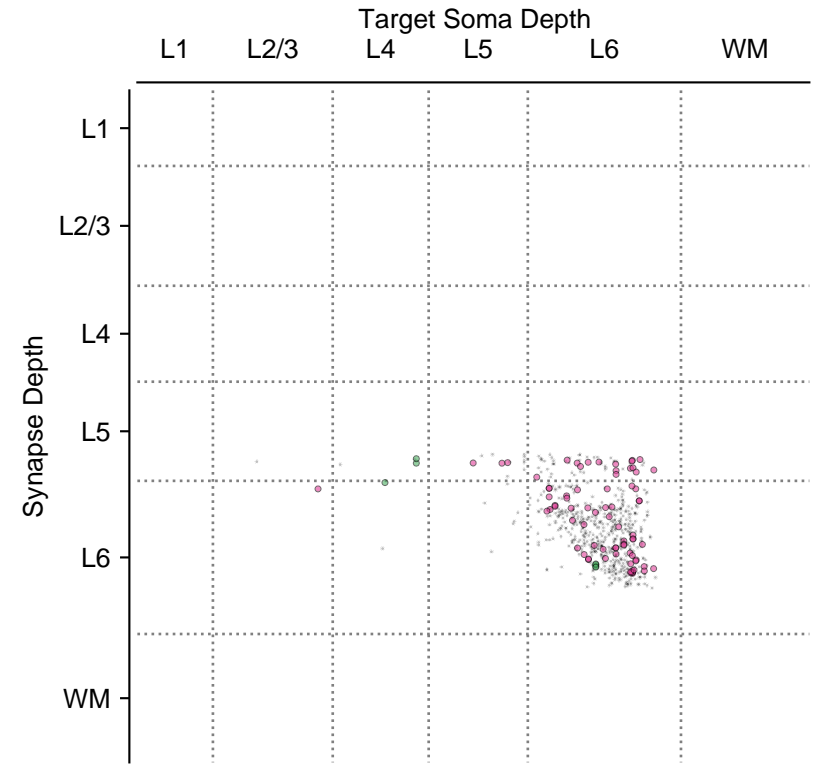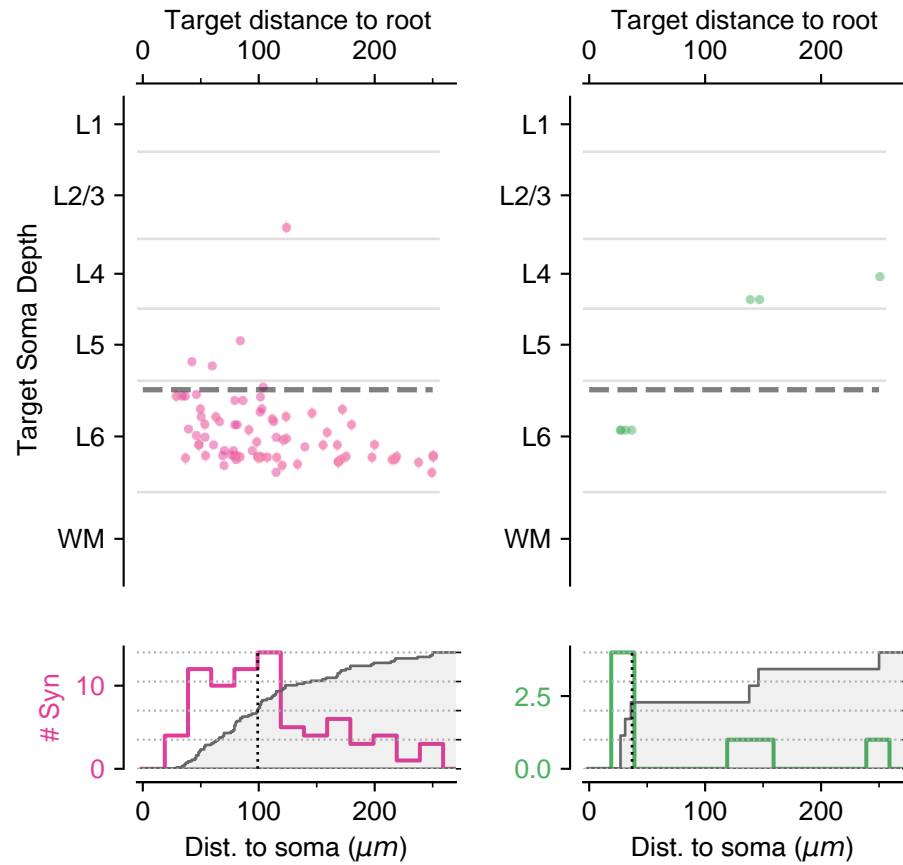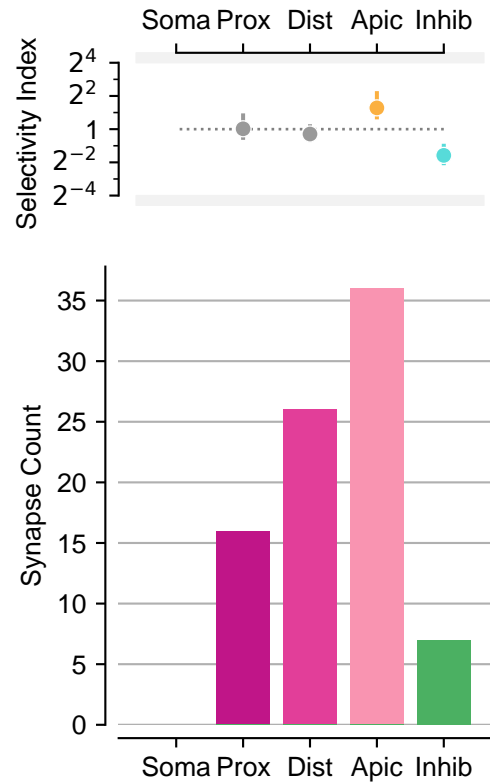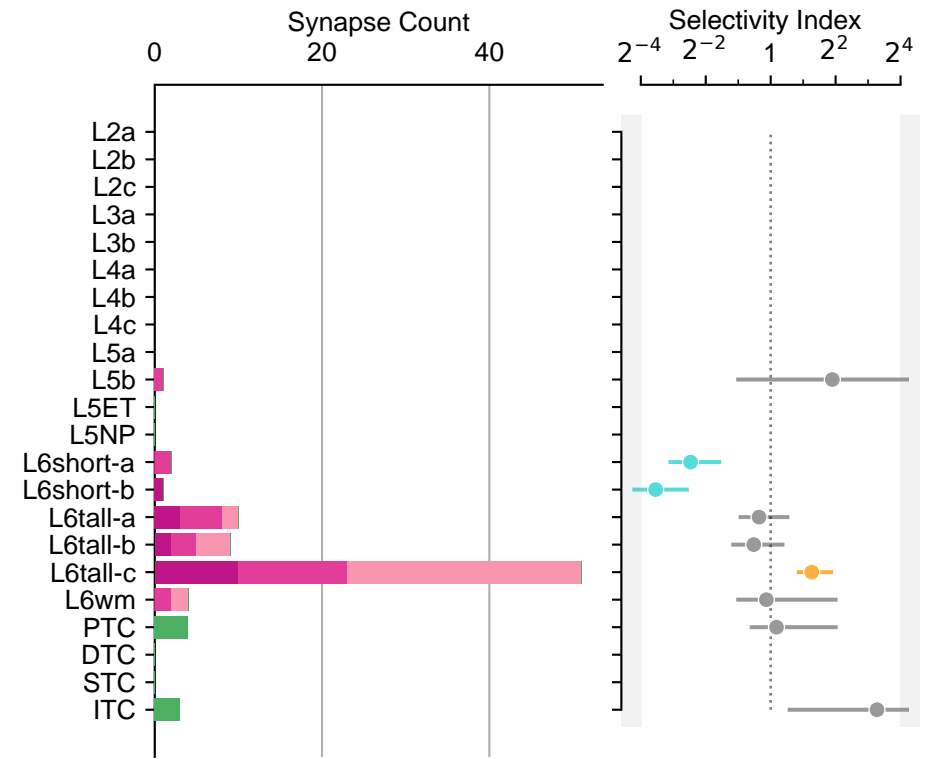

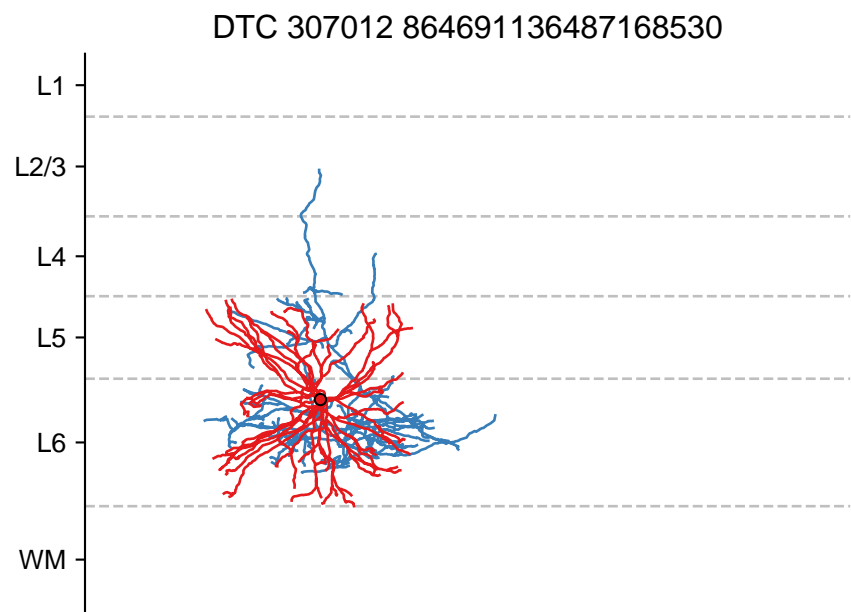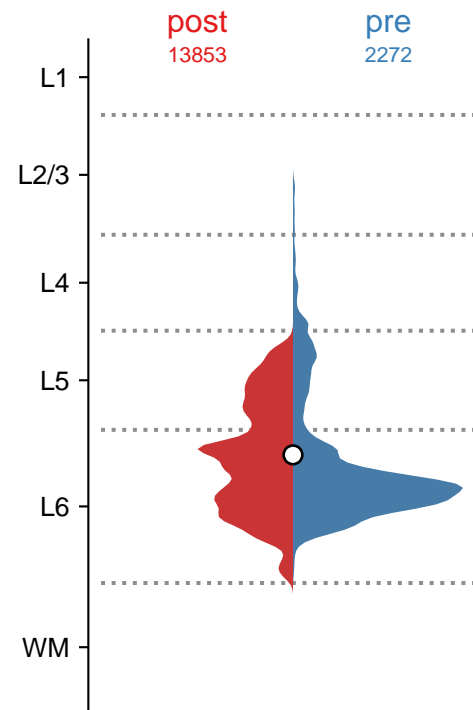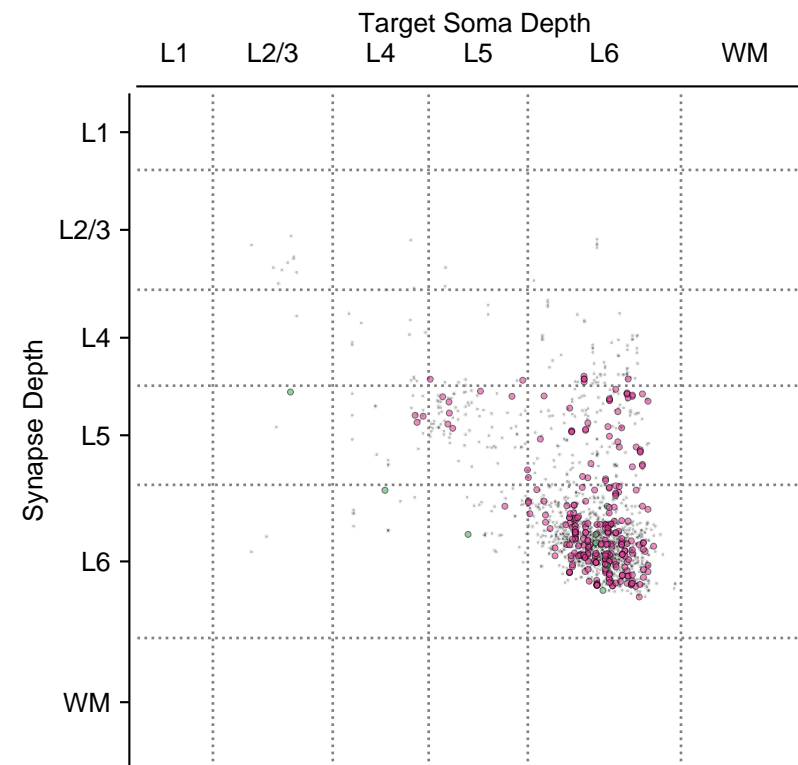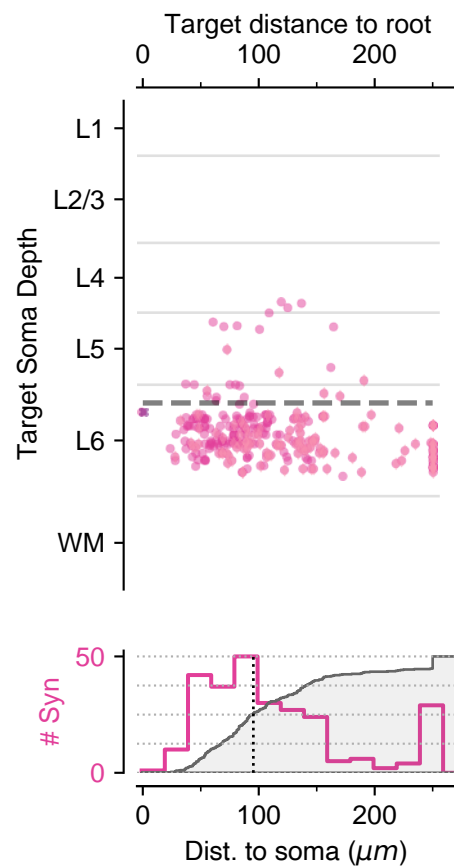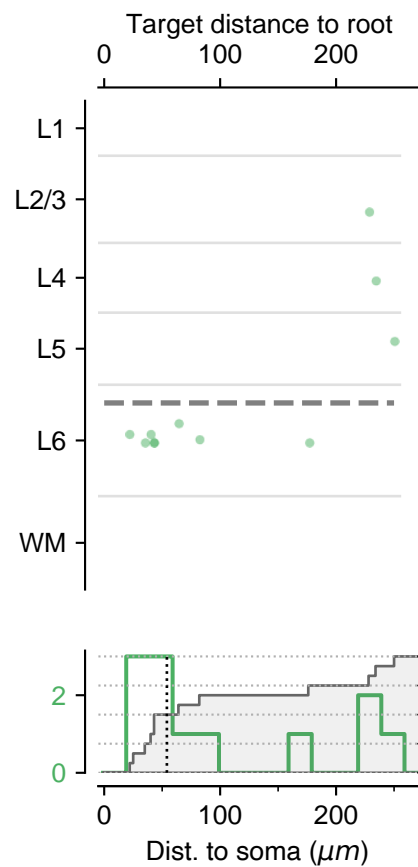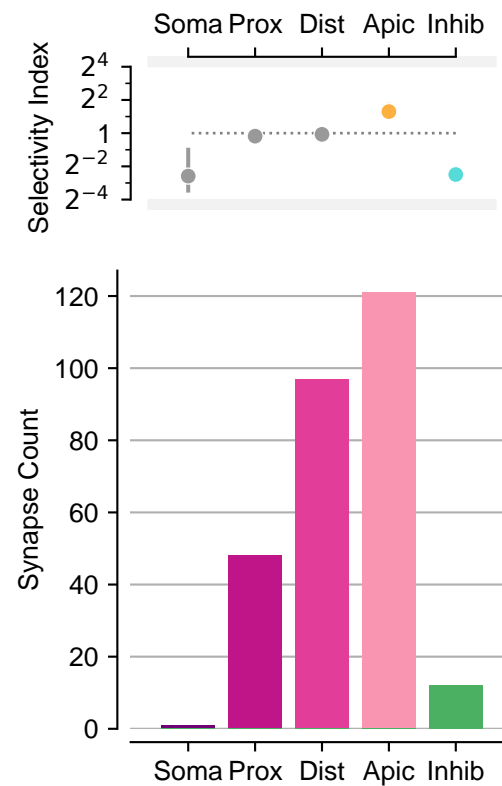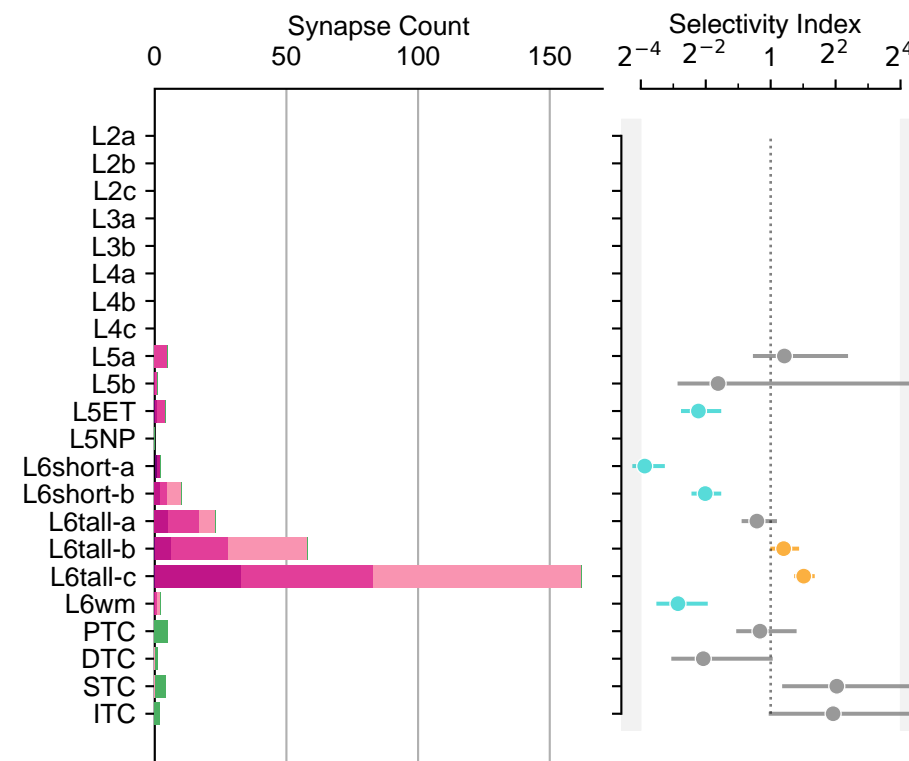

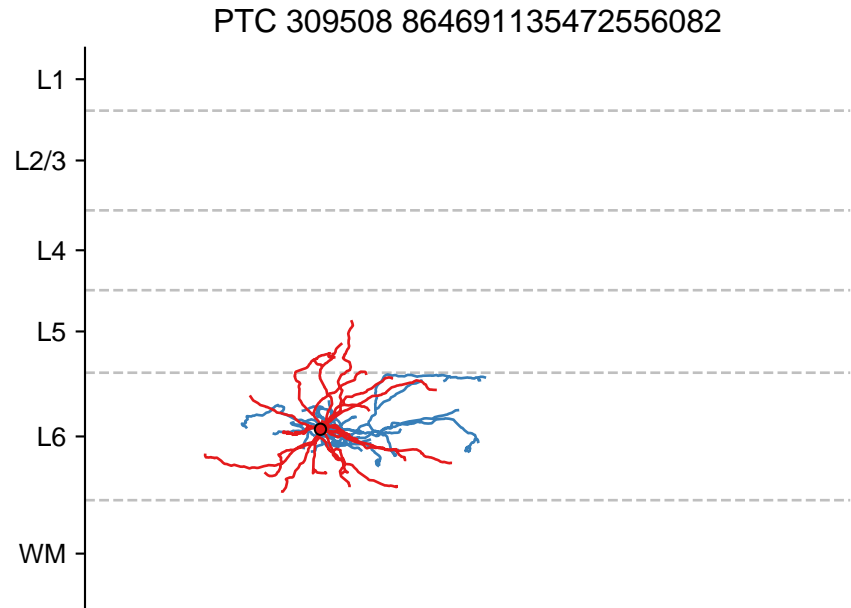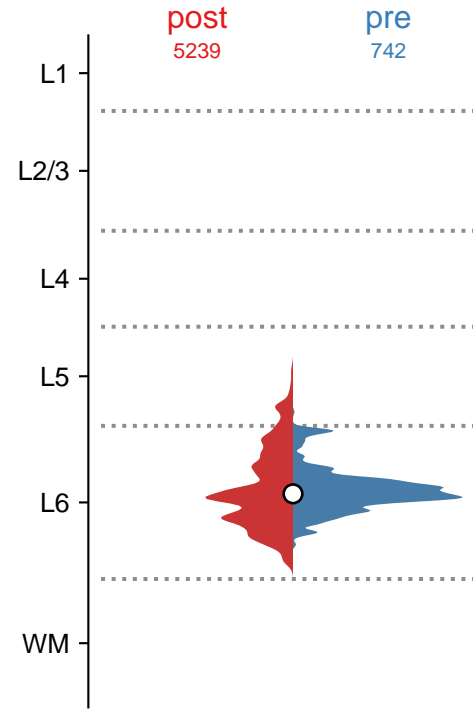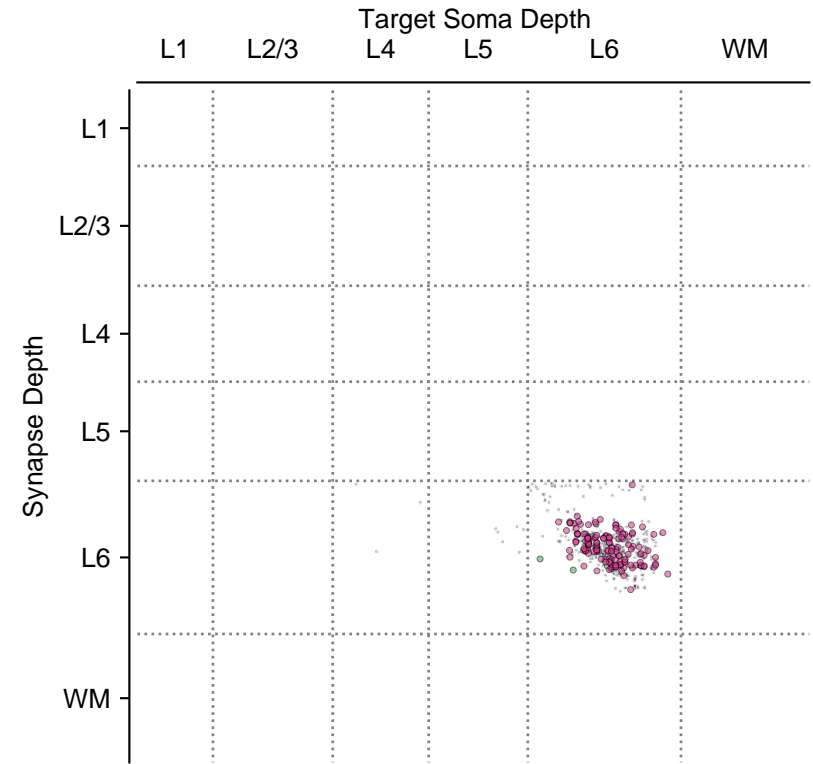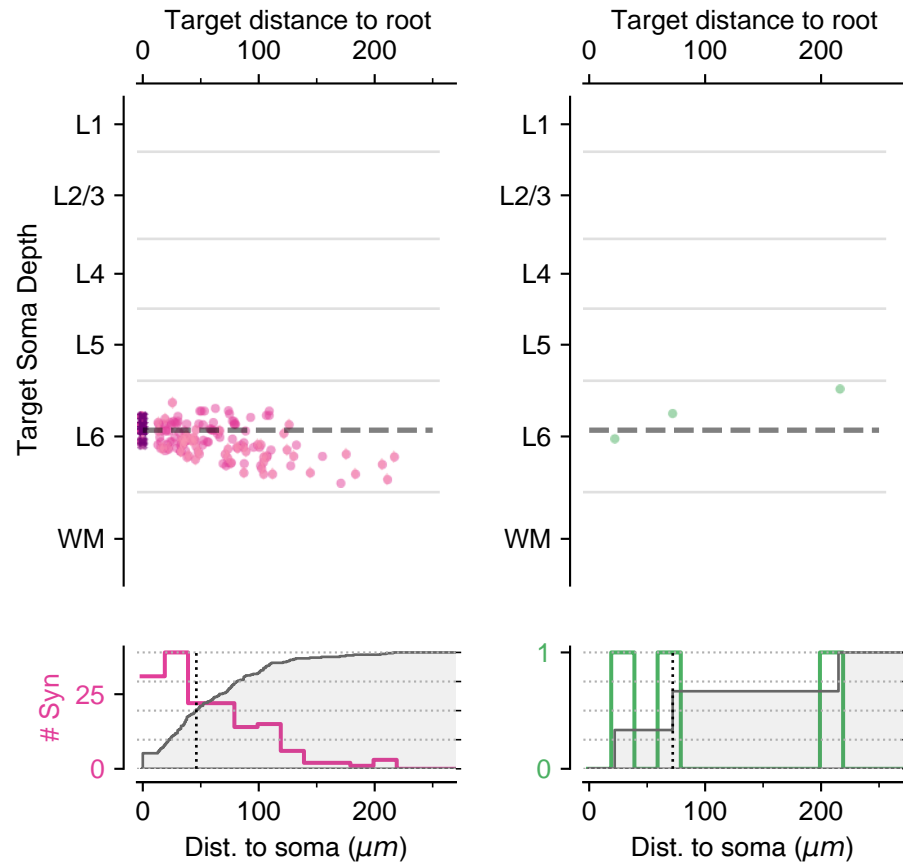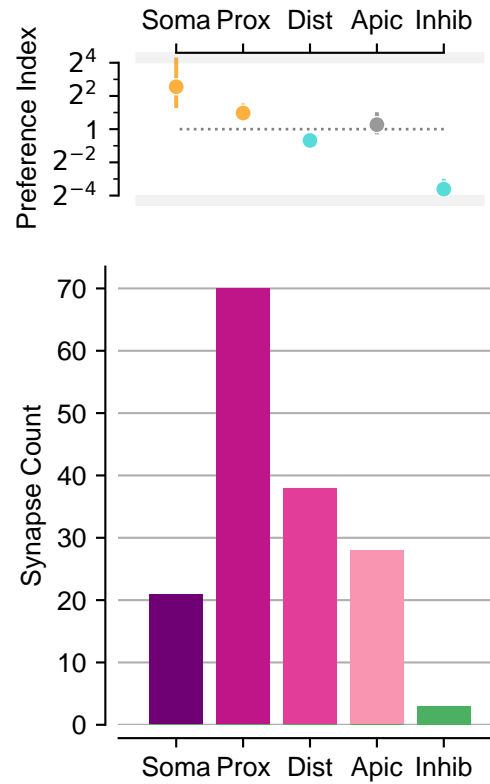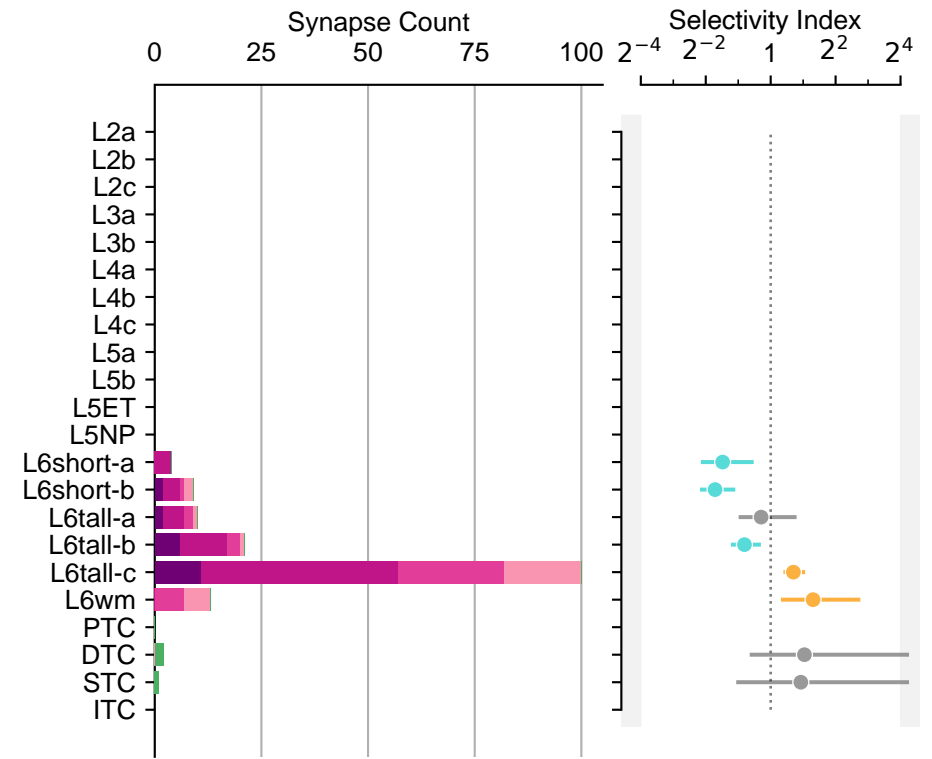

# Motif Group 18

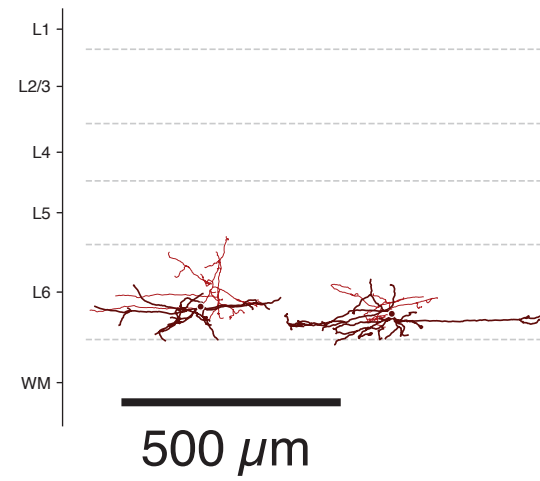

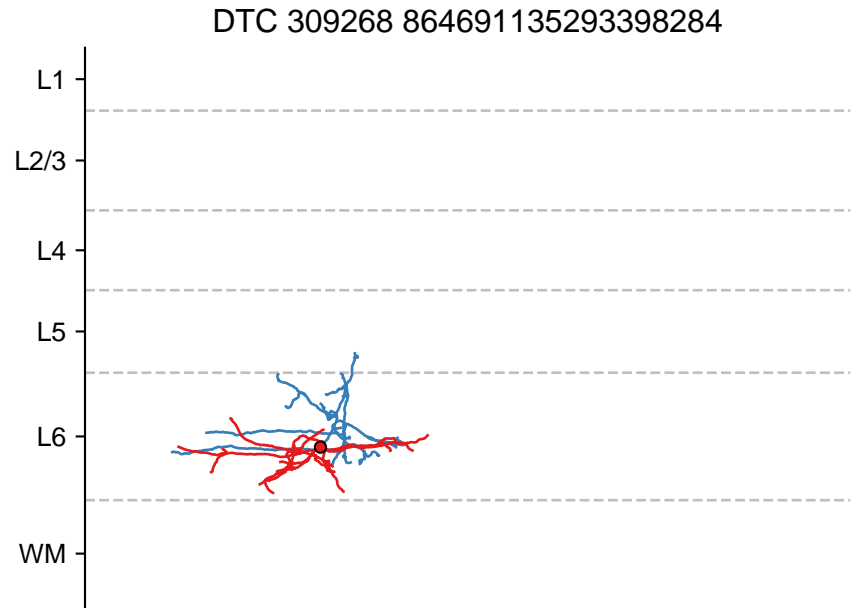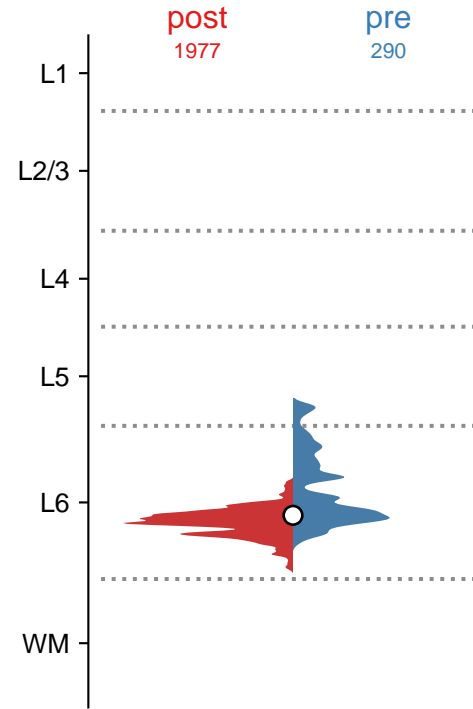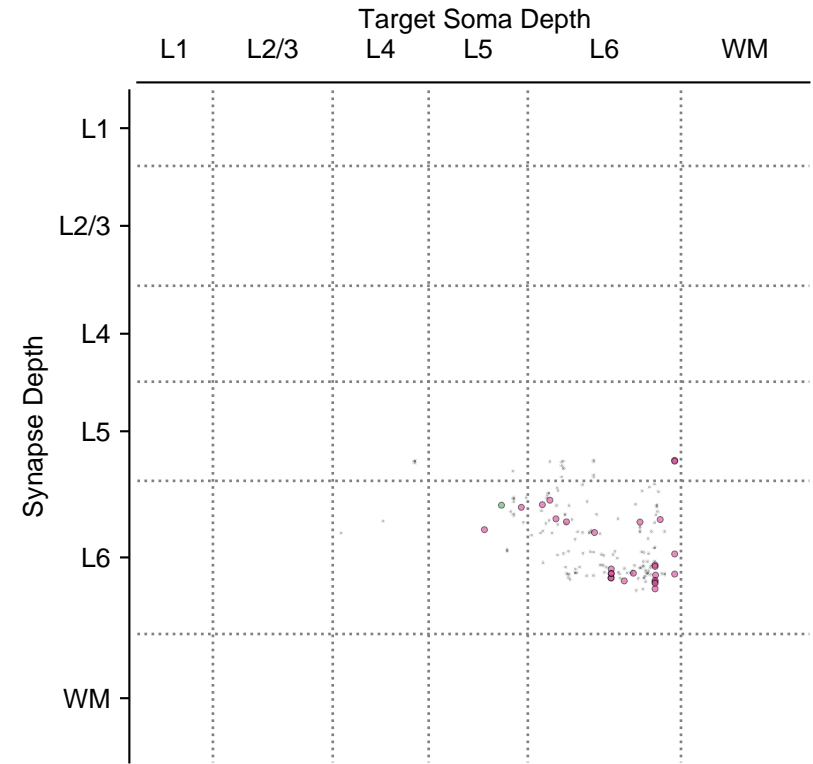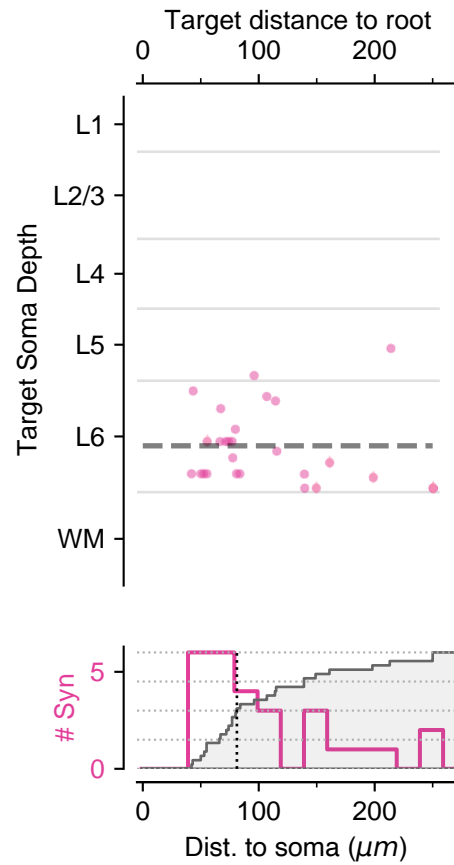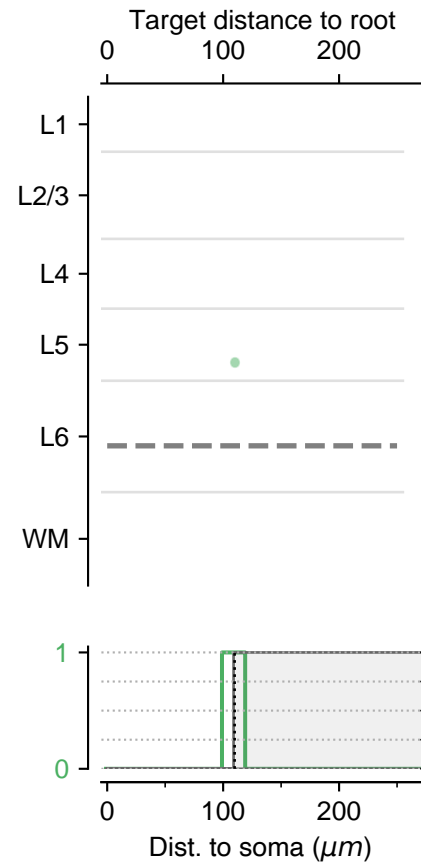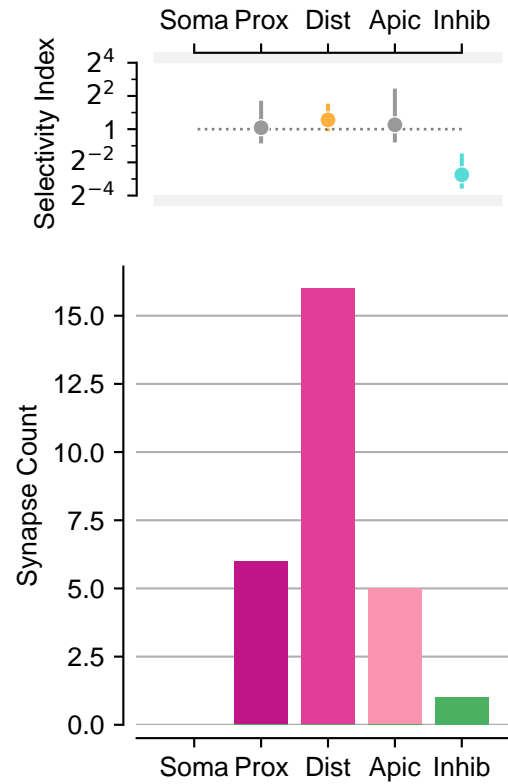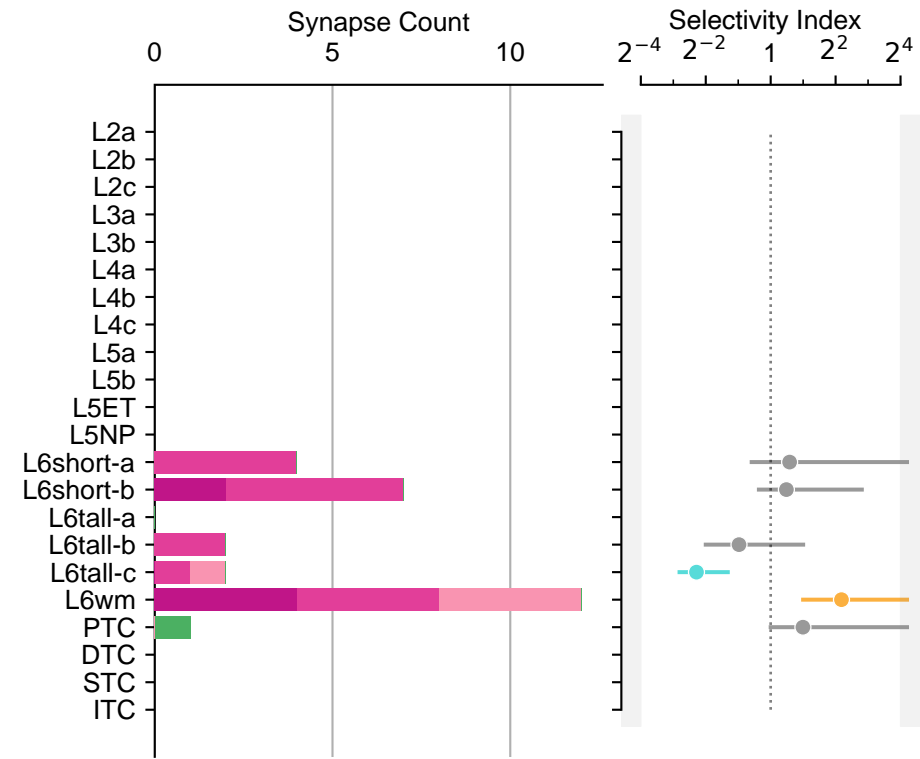

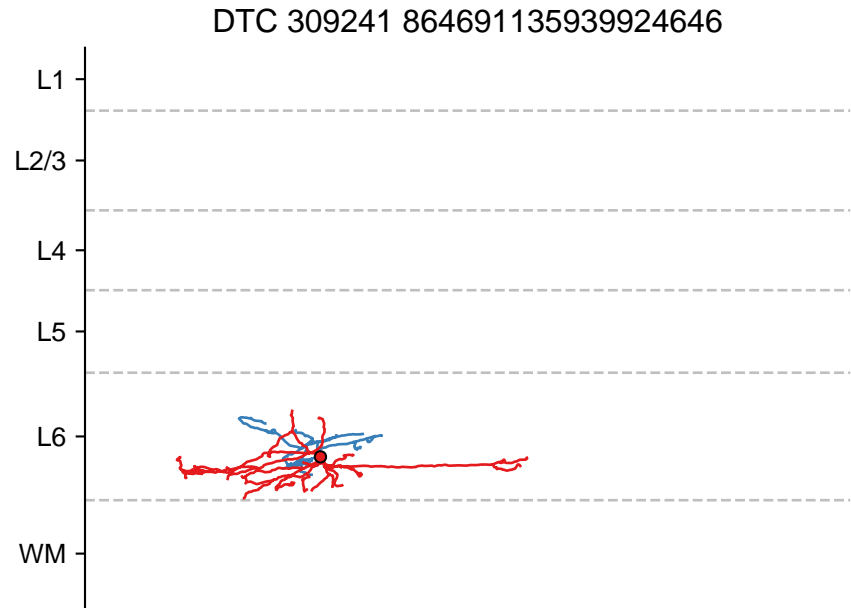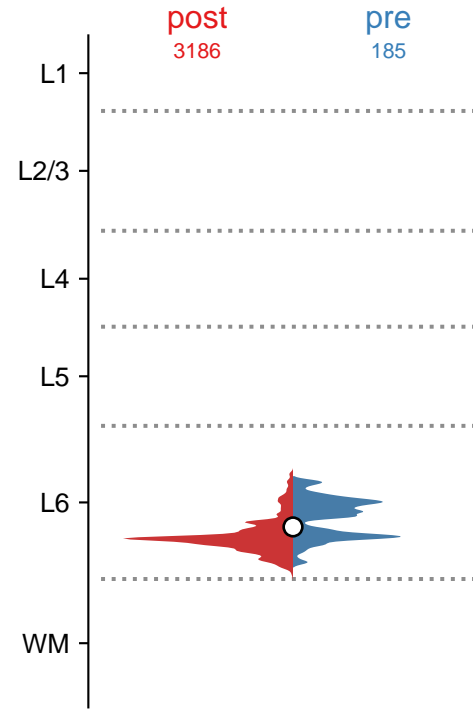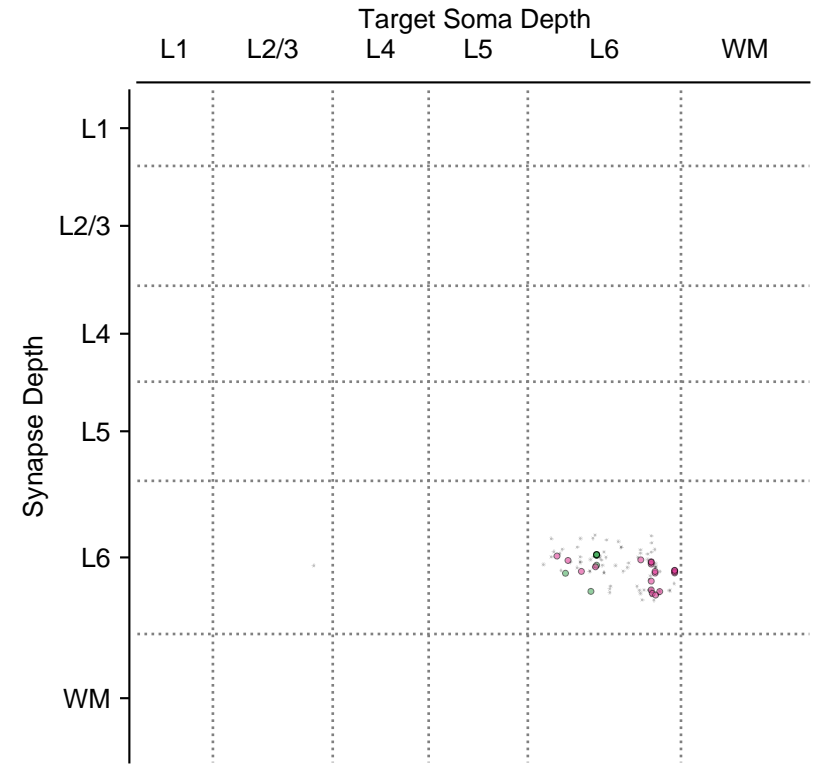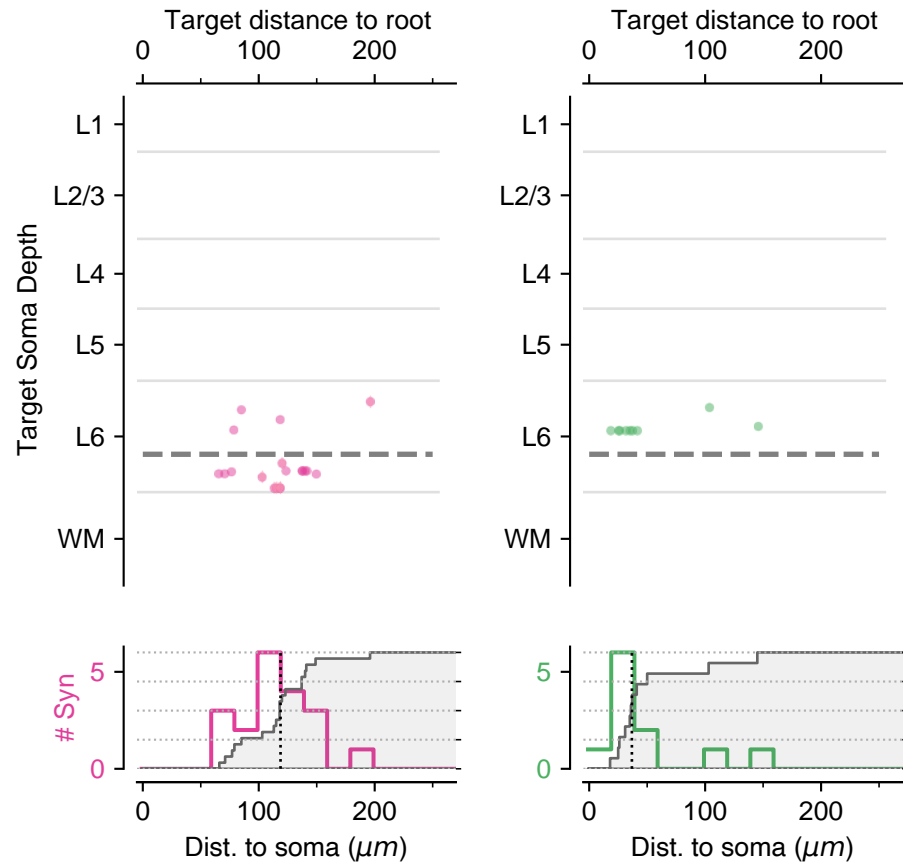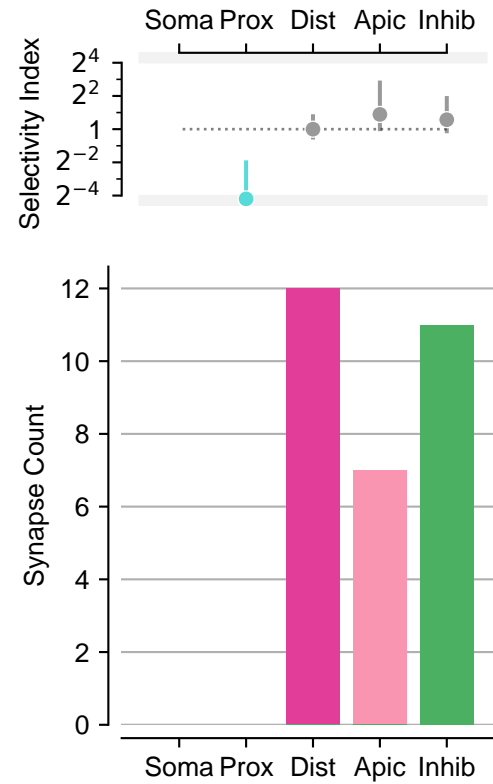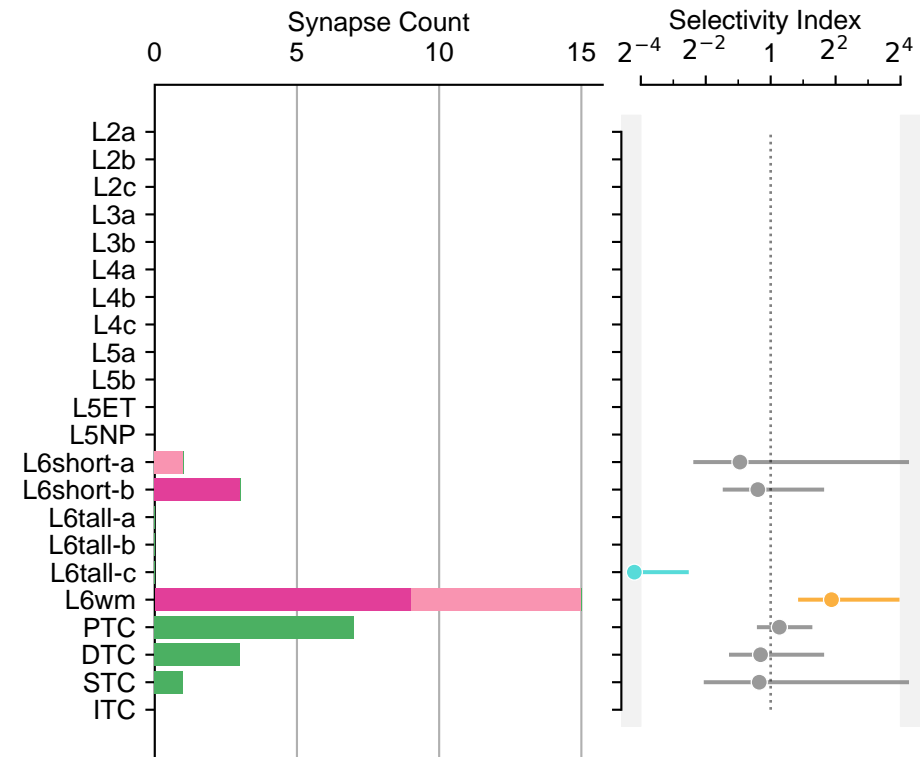



# Motif Group 19

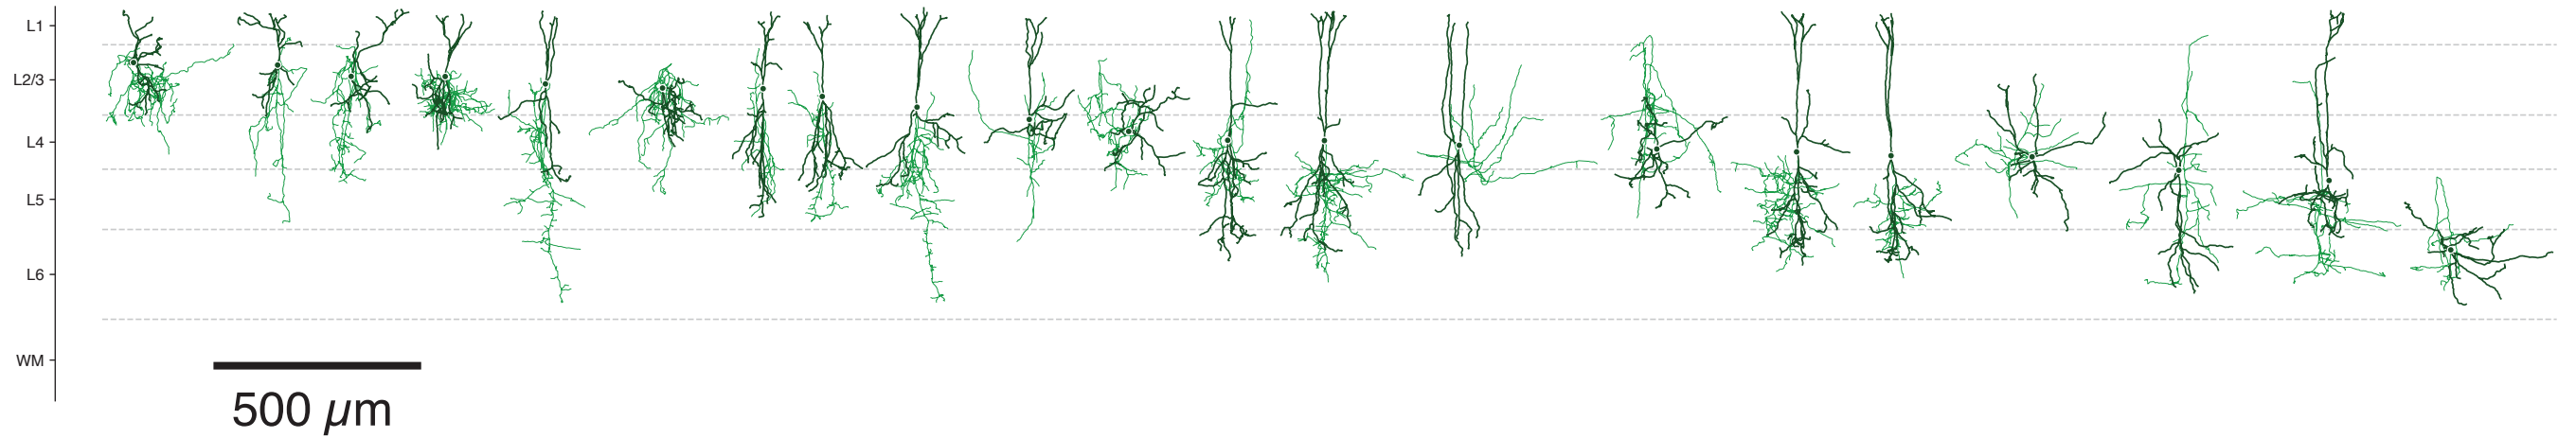

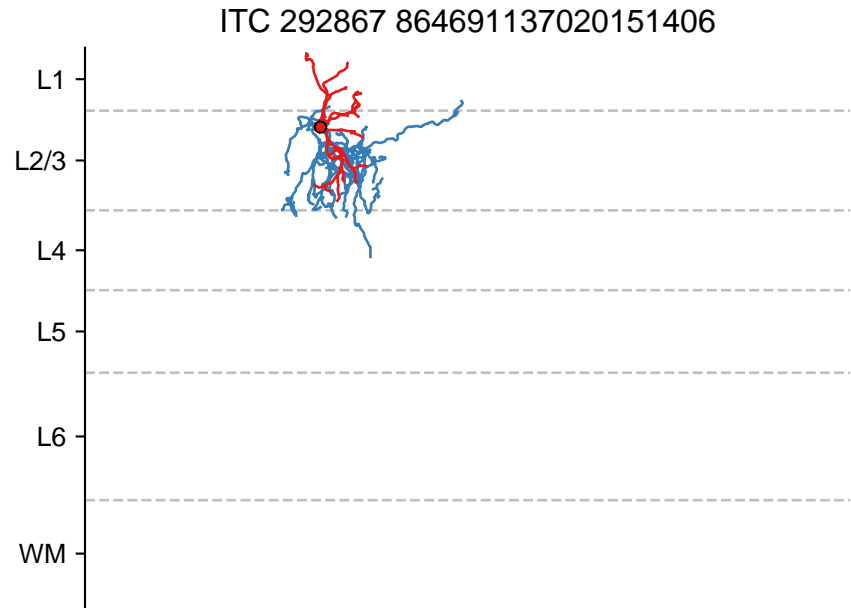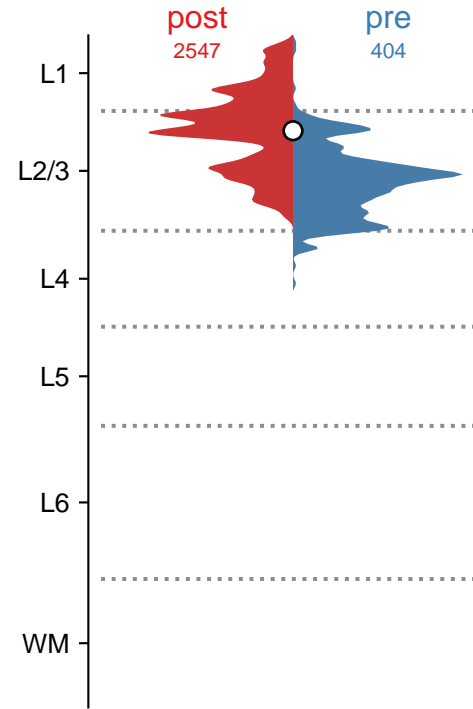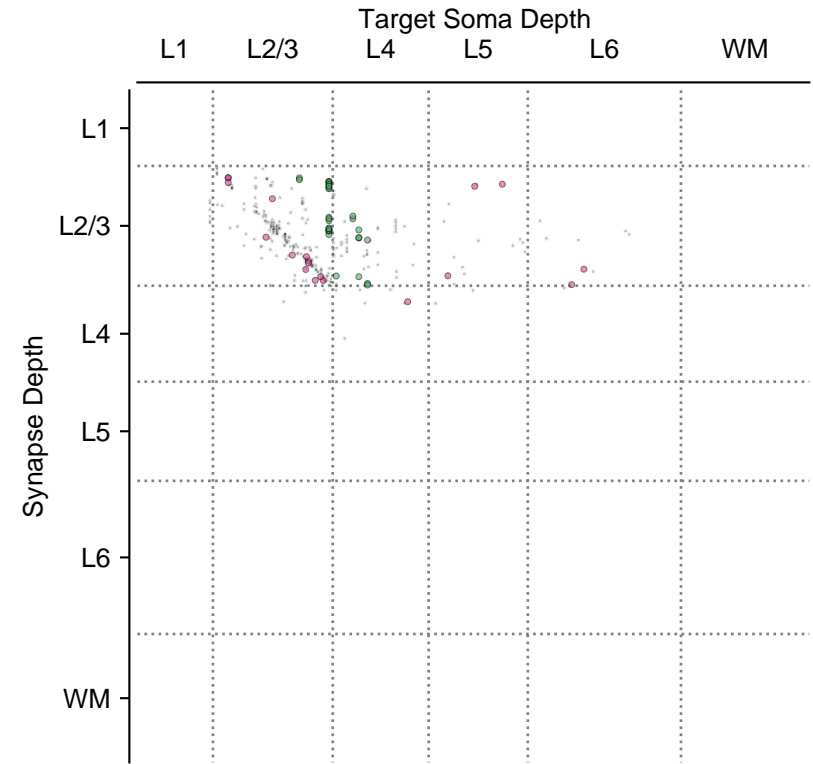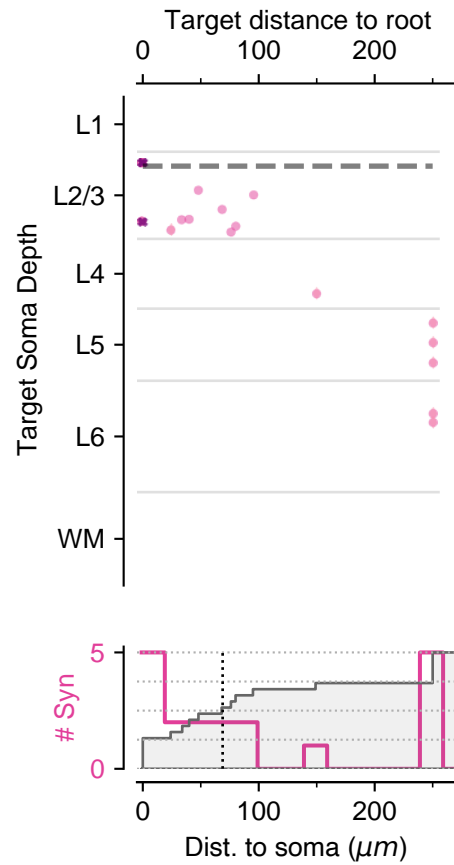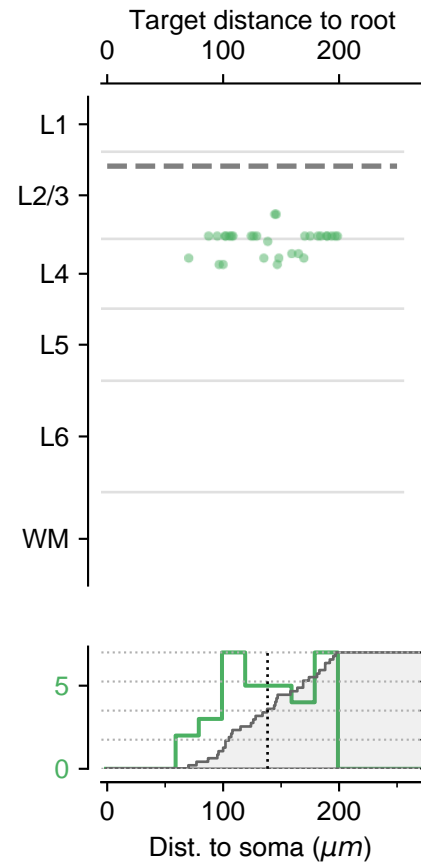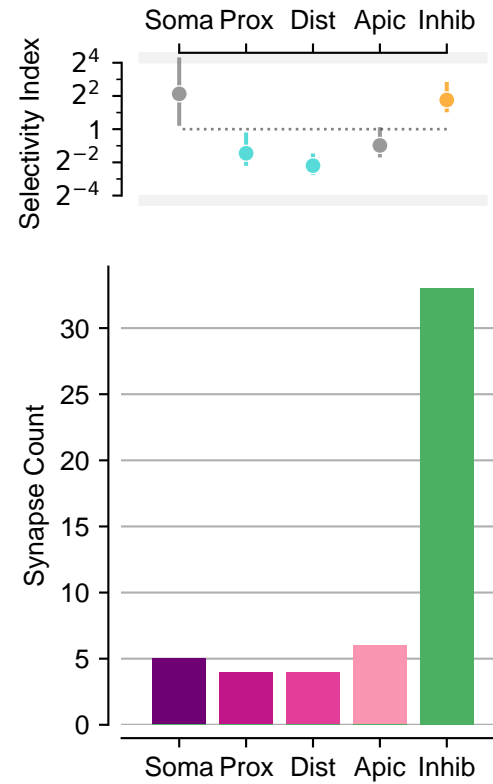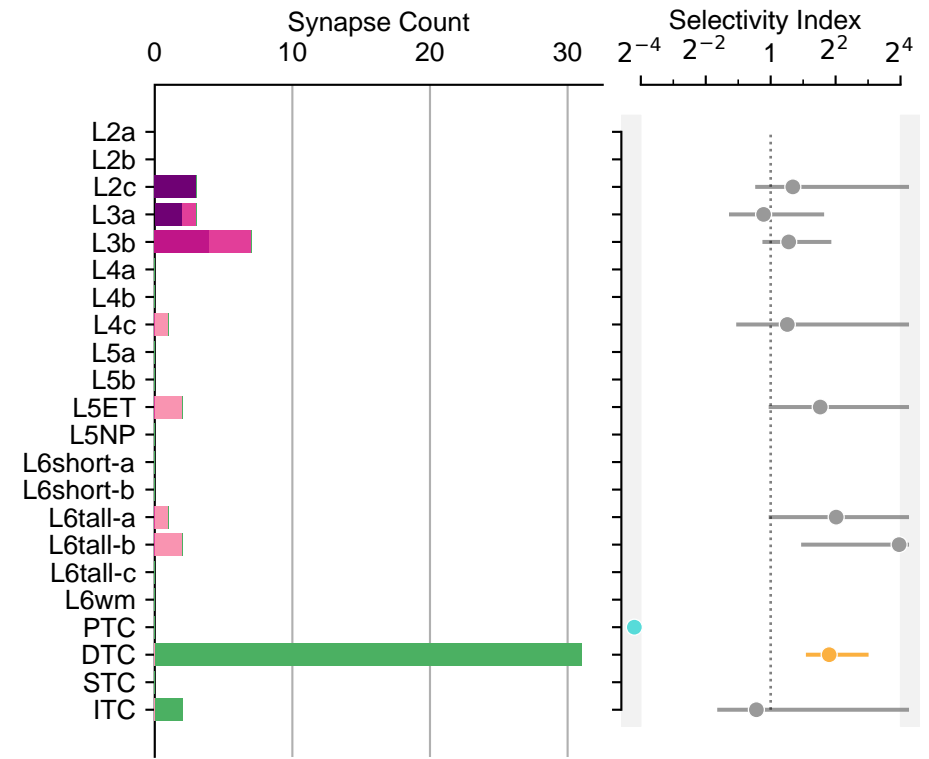

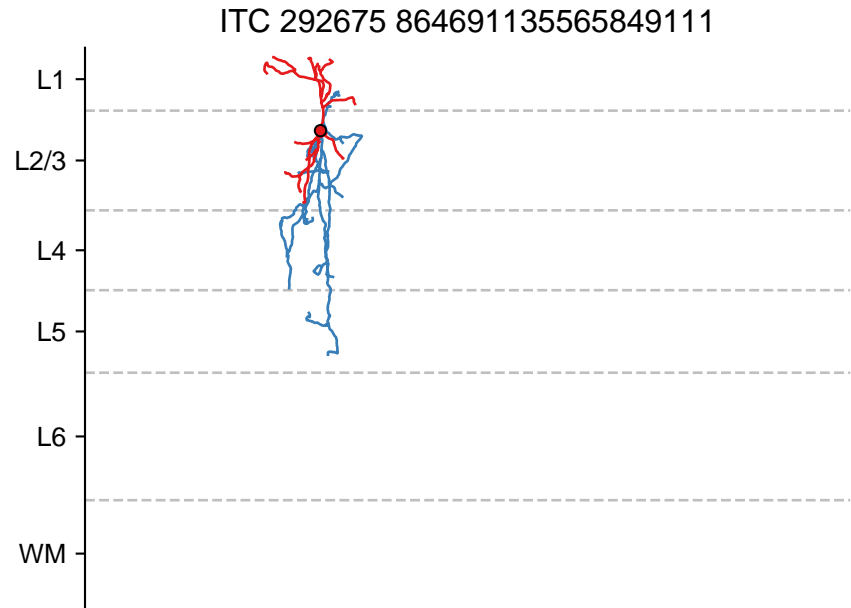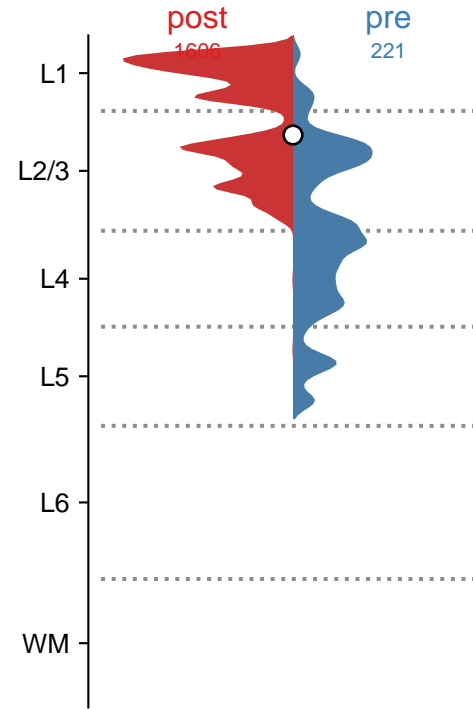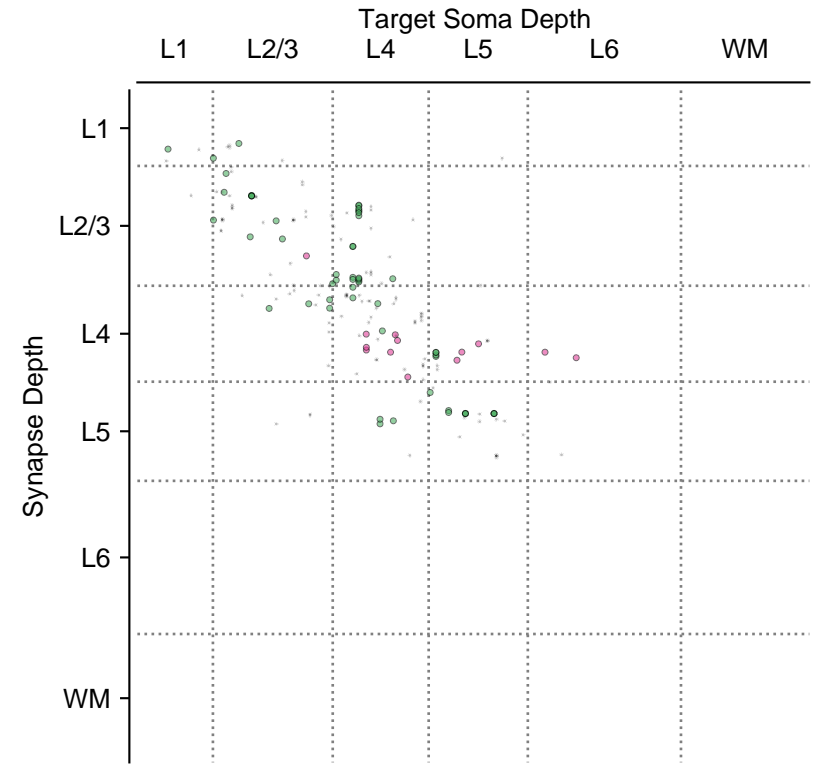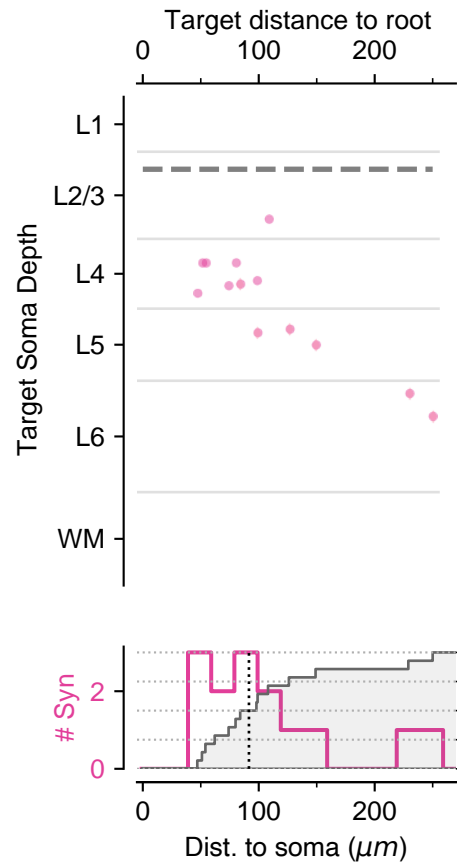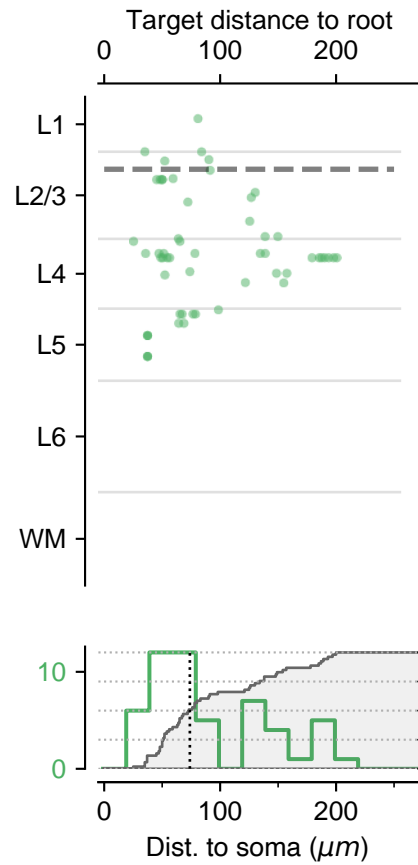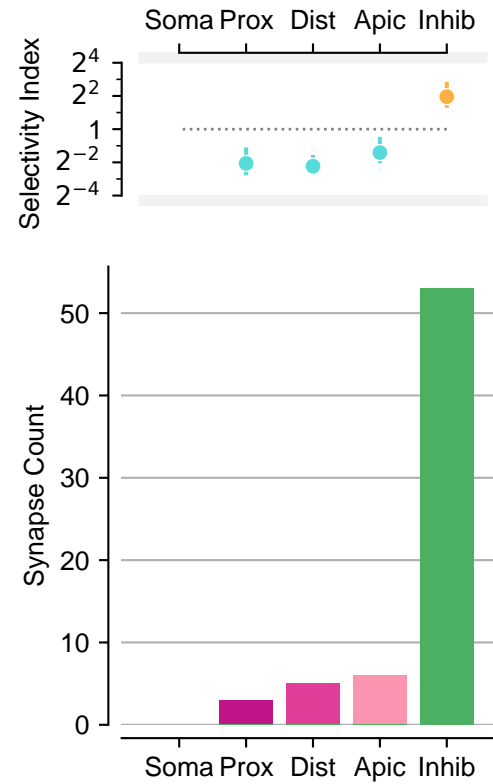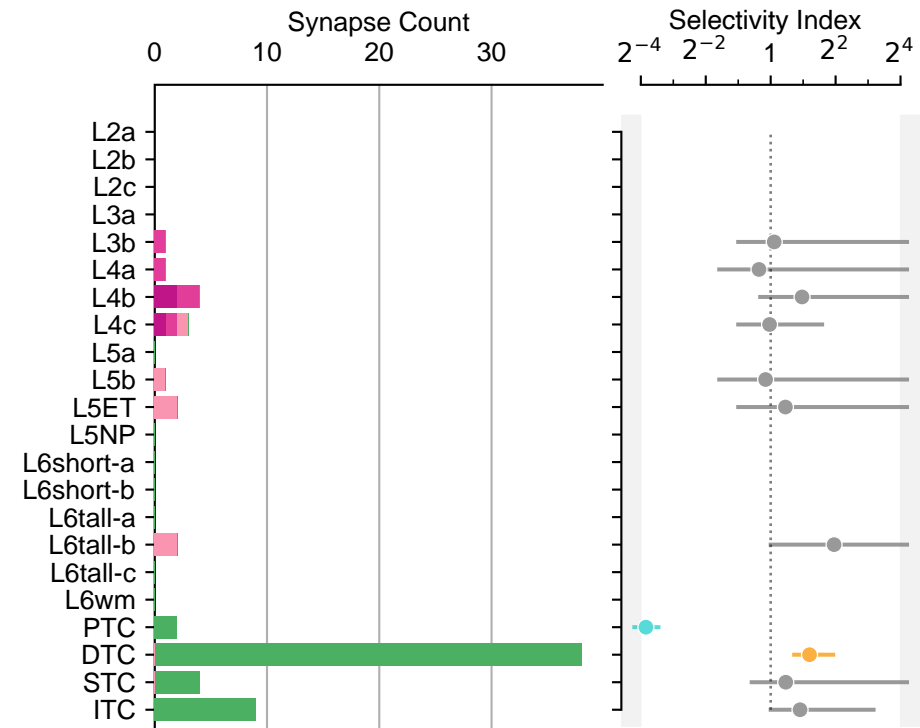

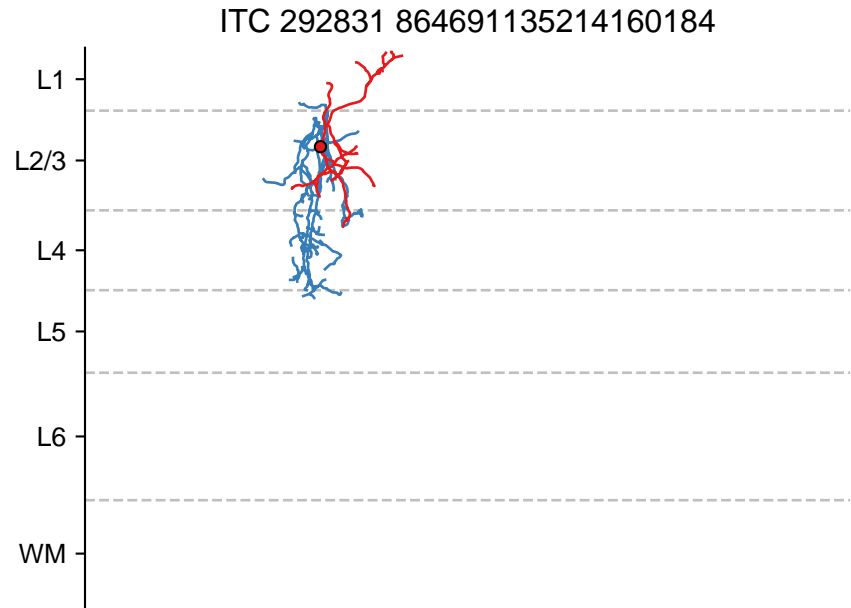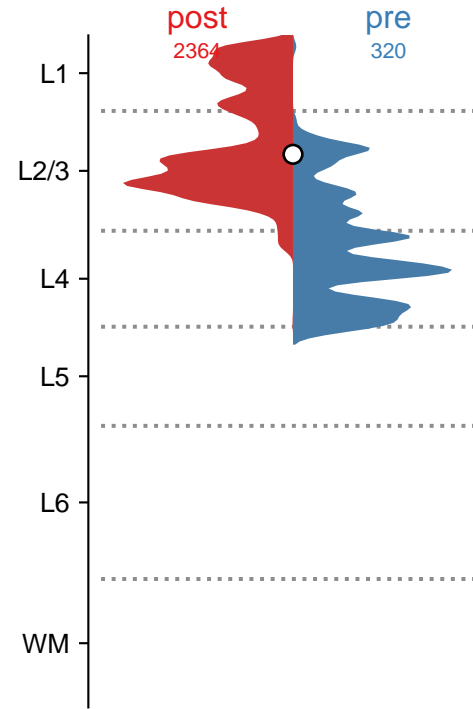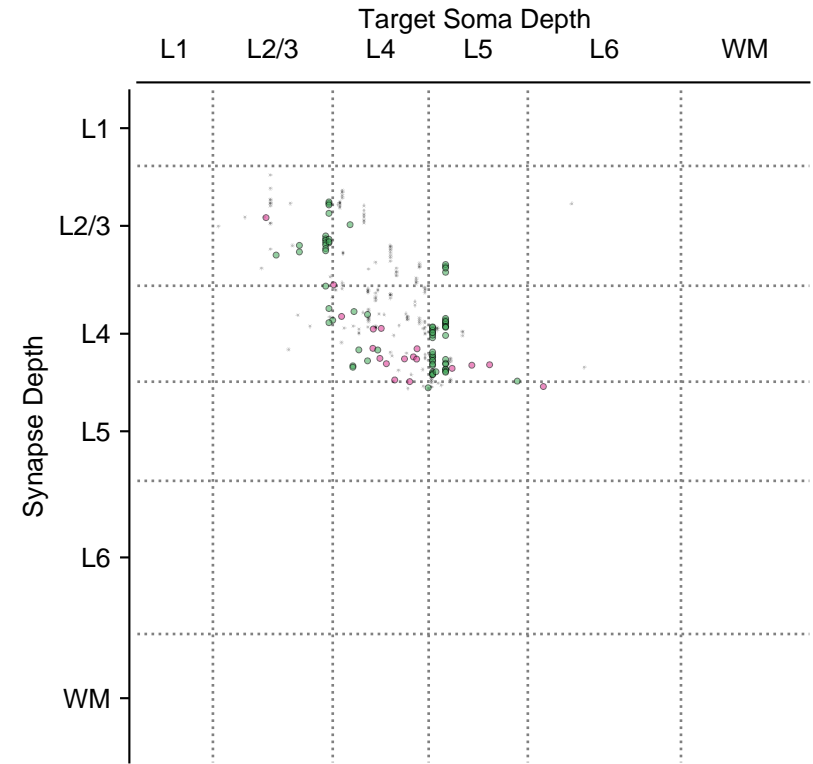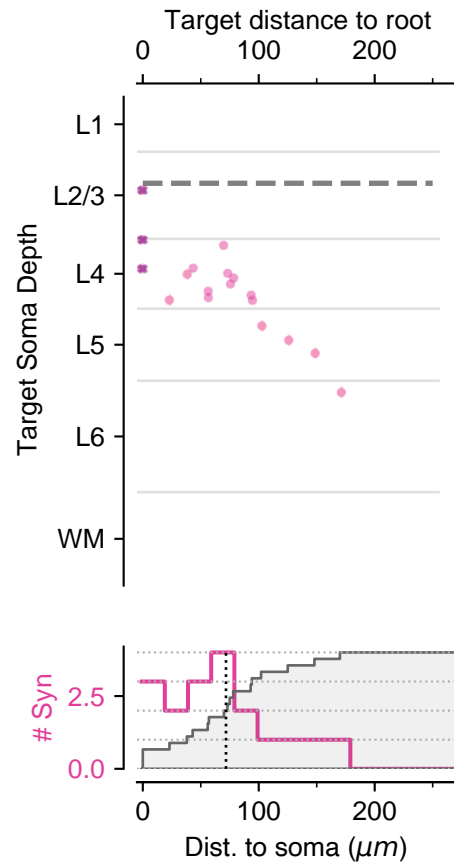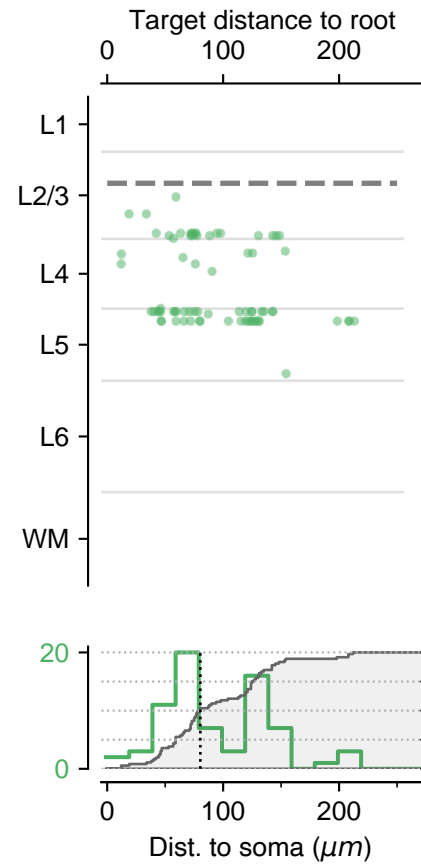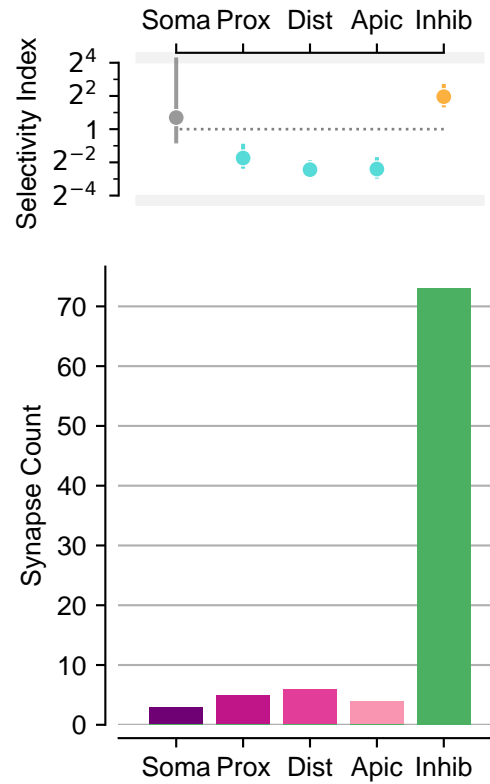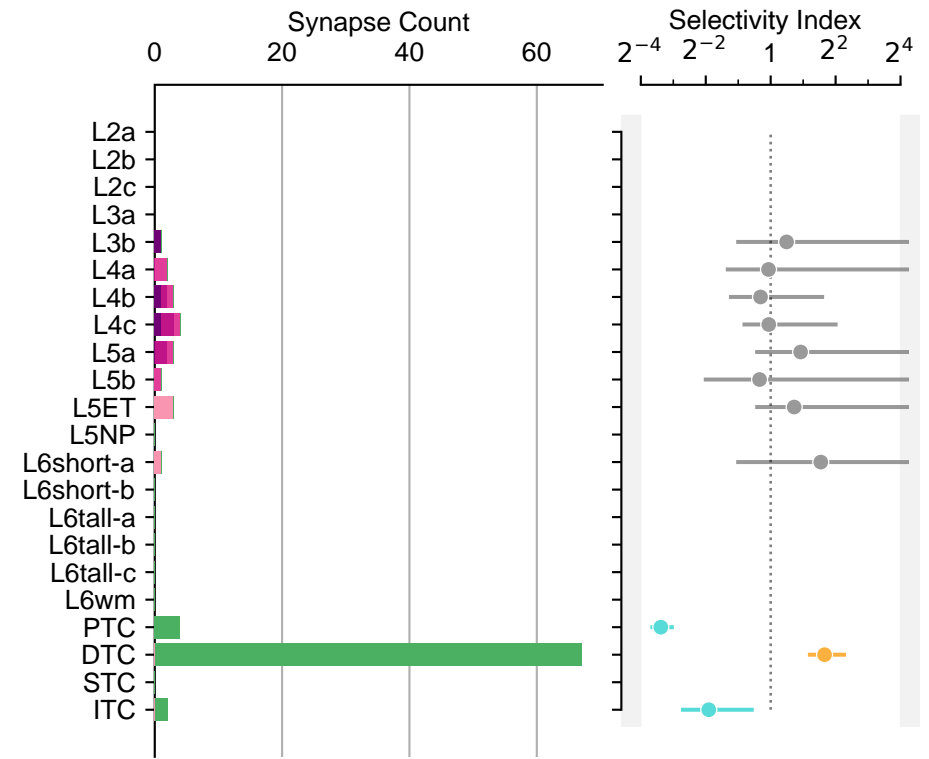

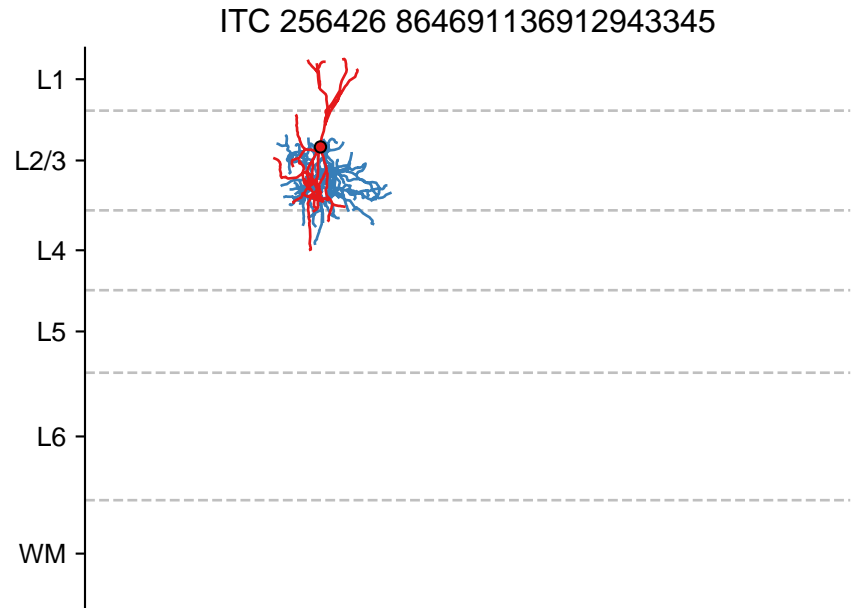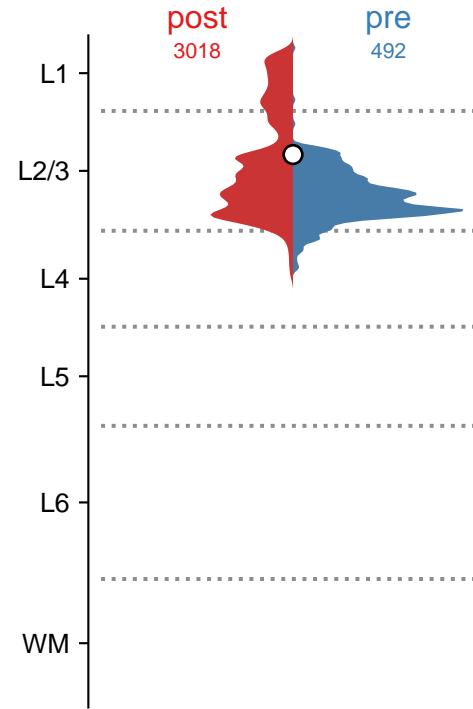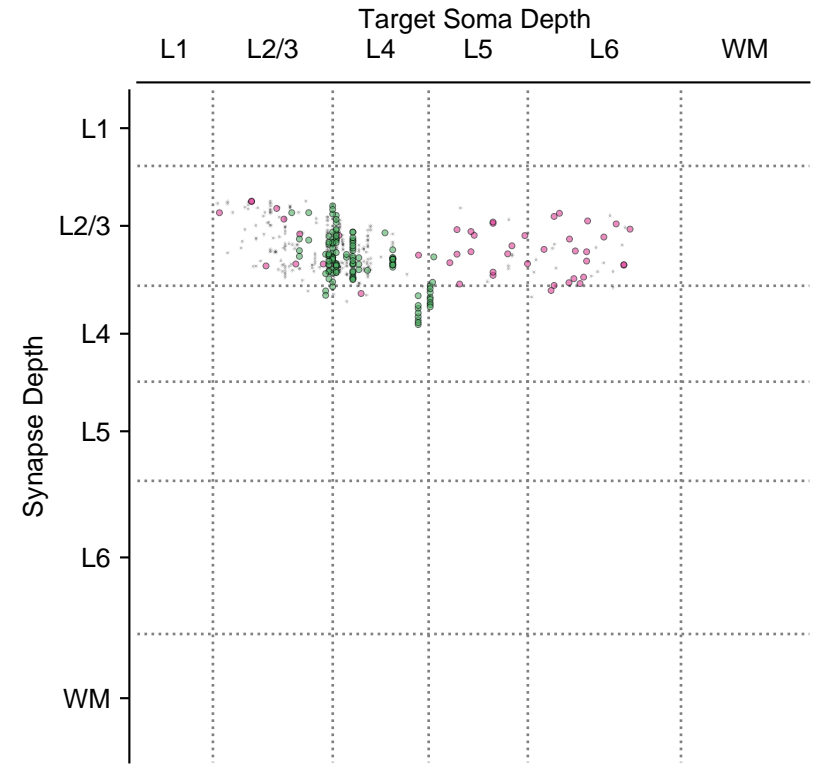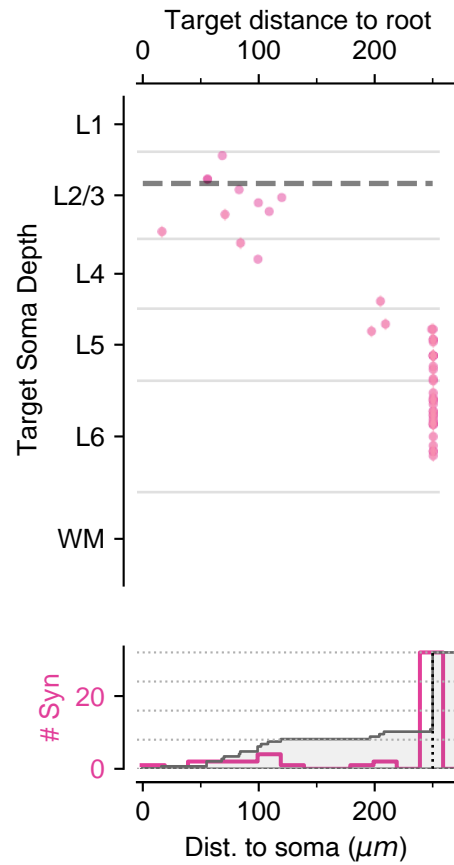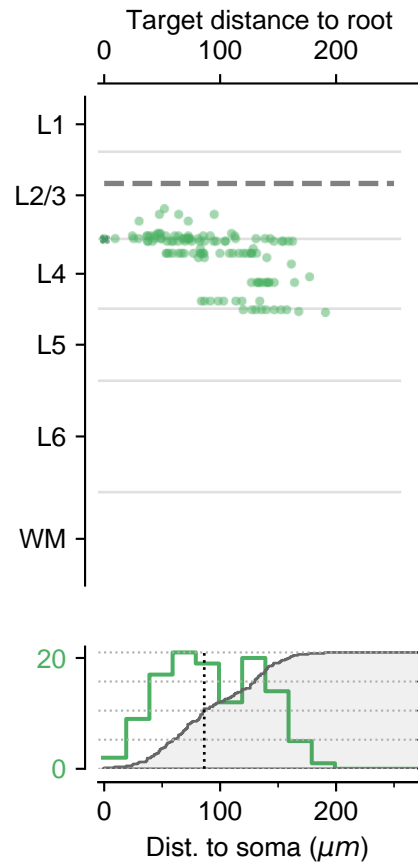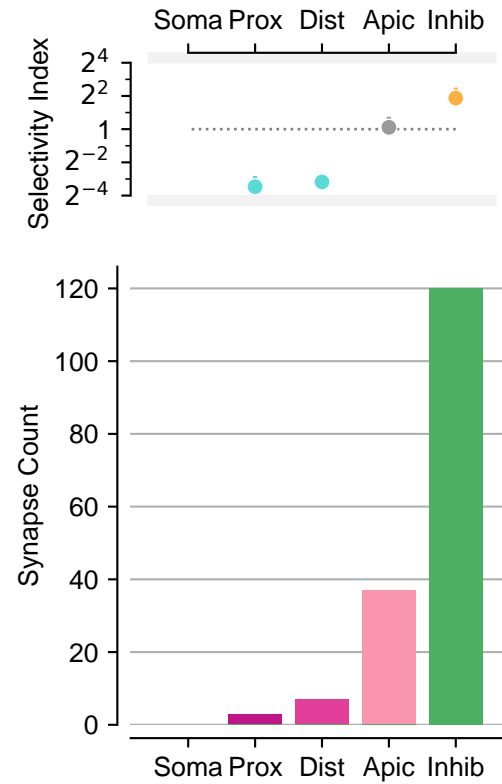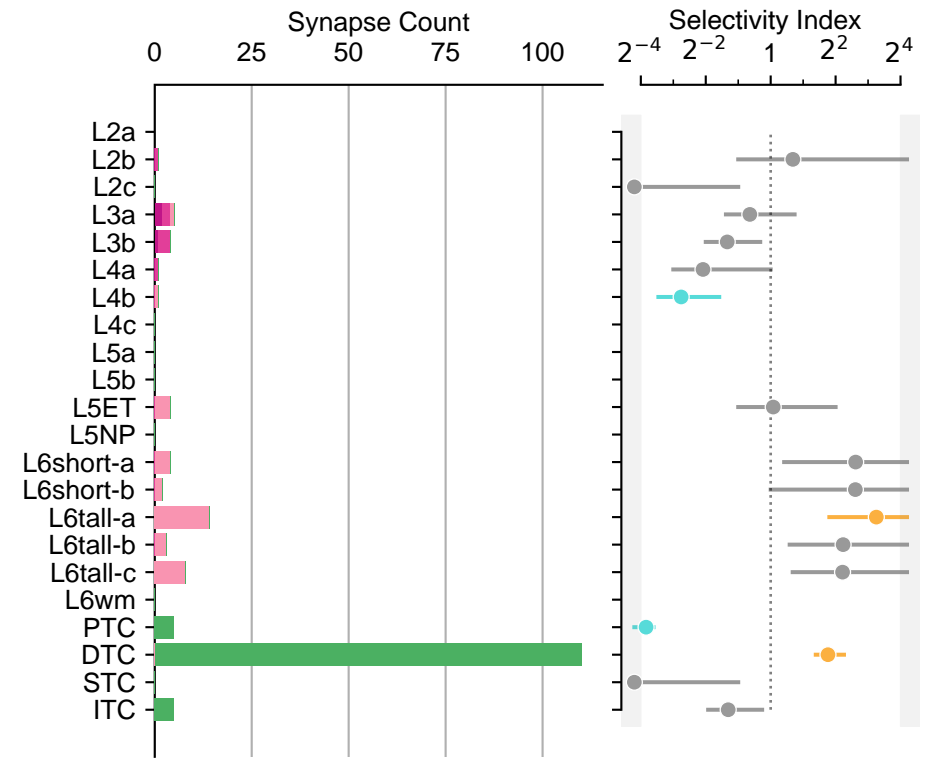

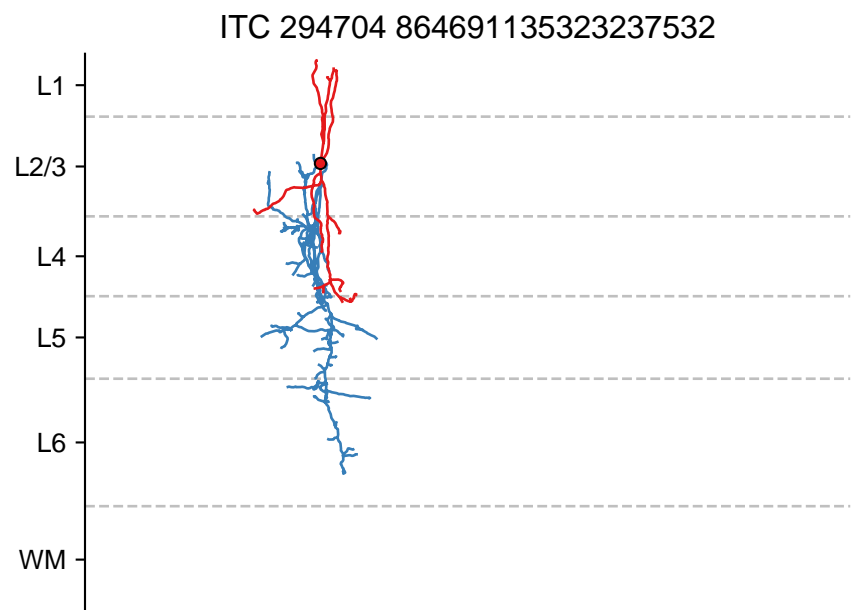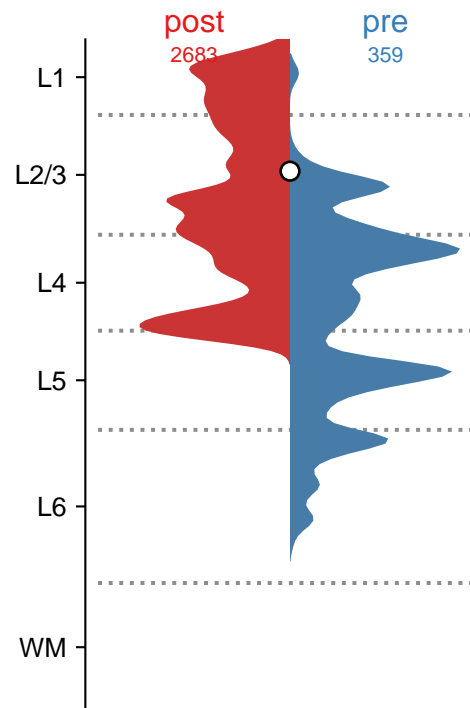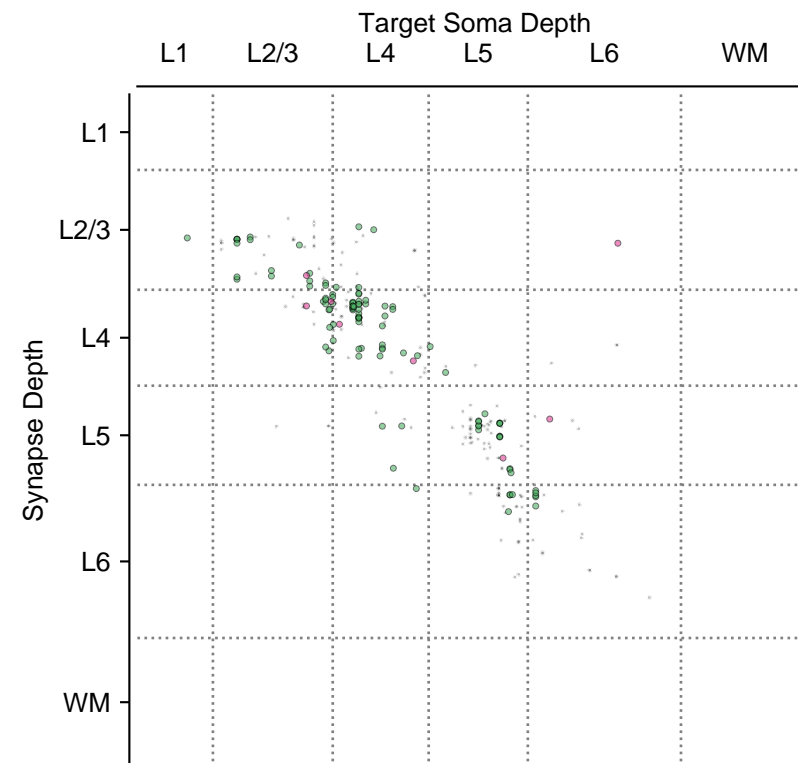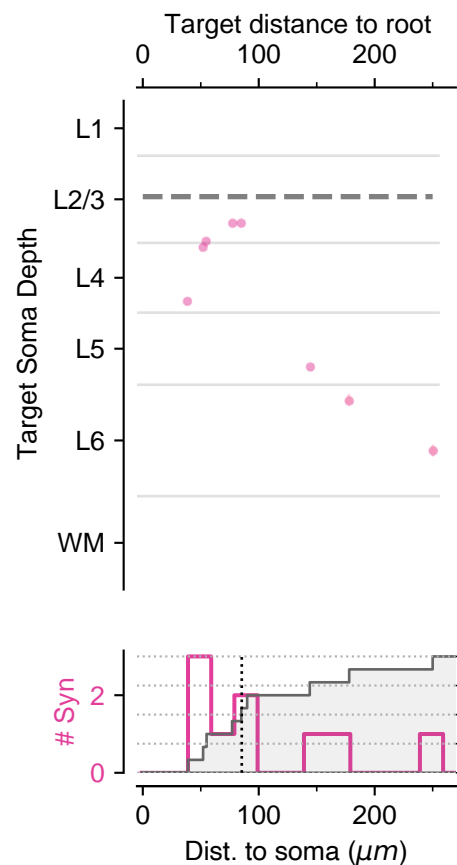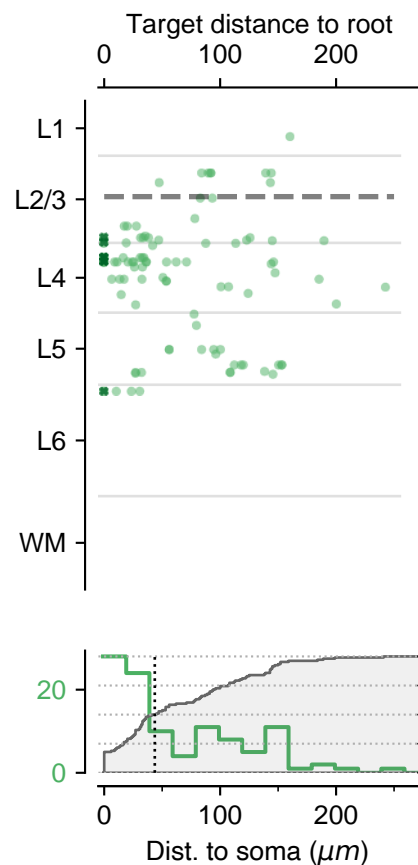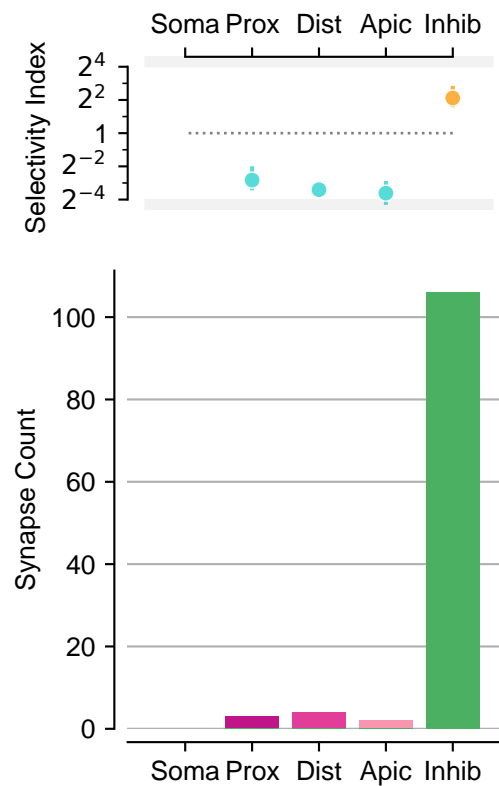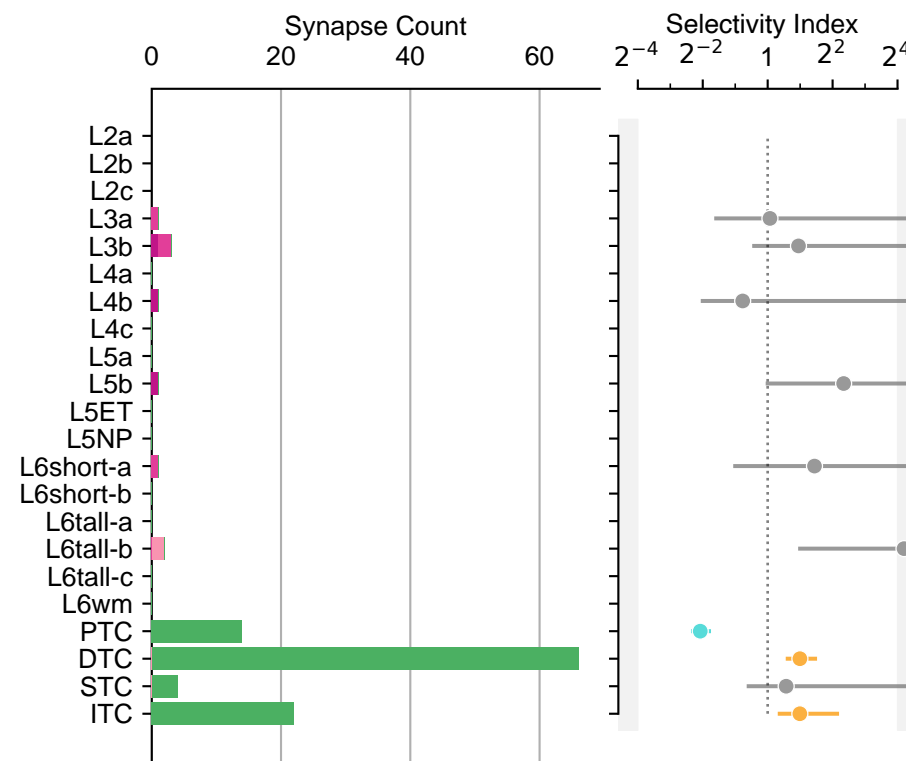

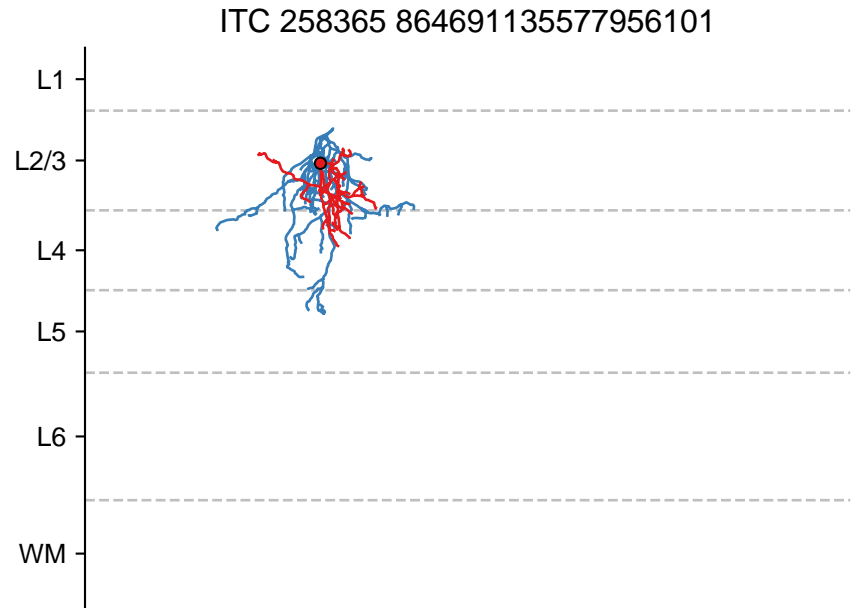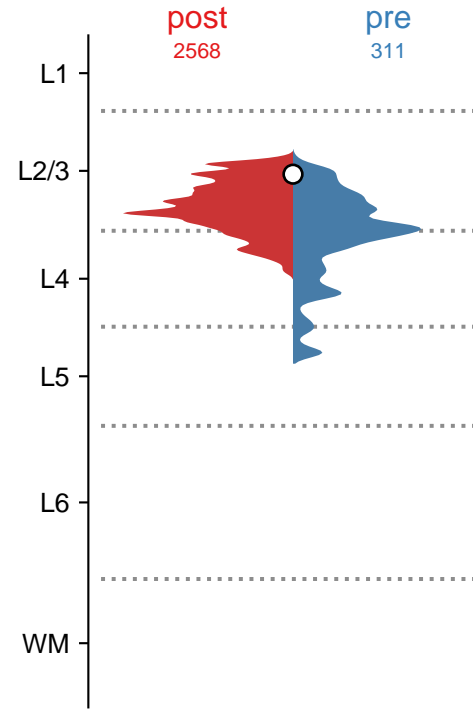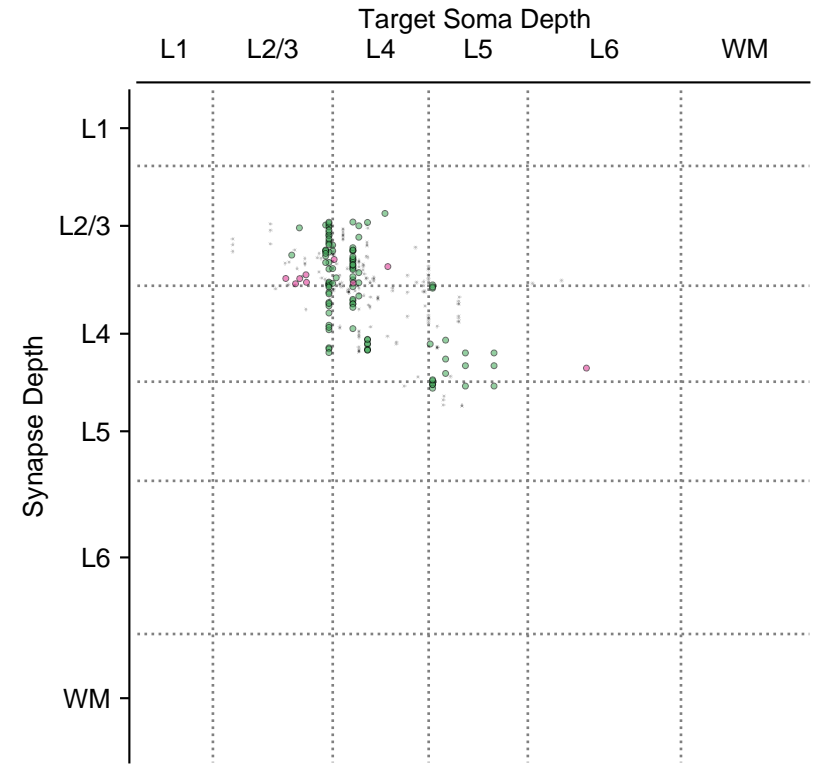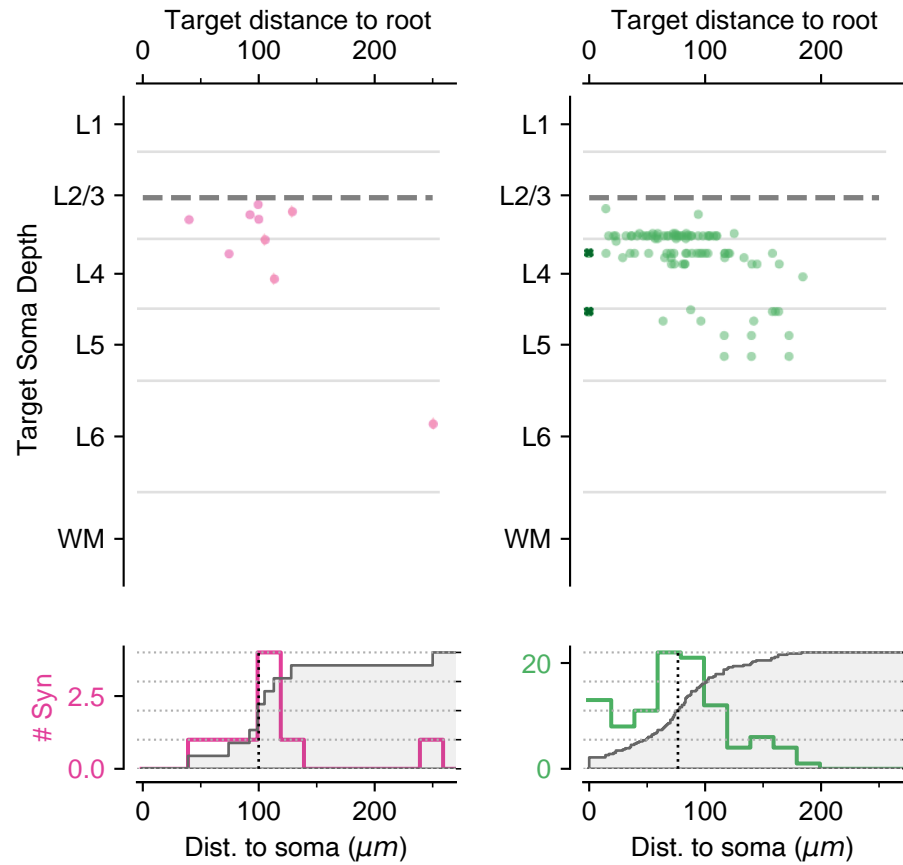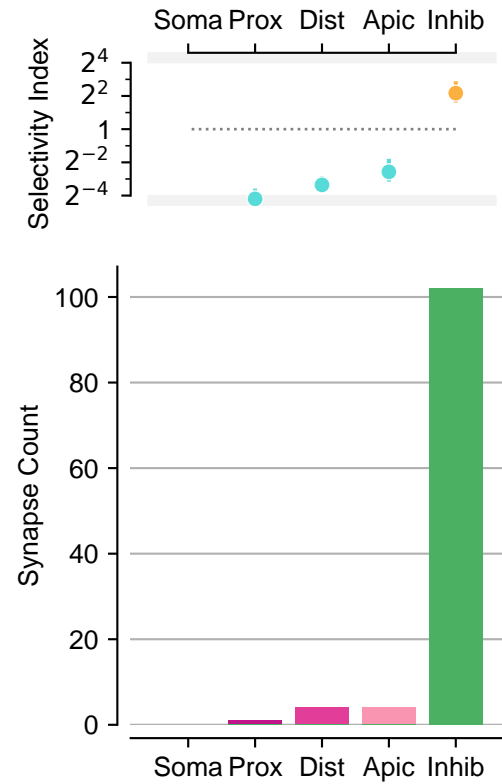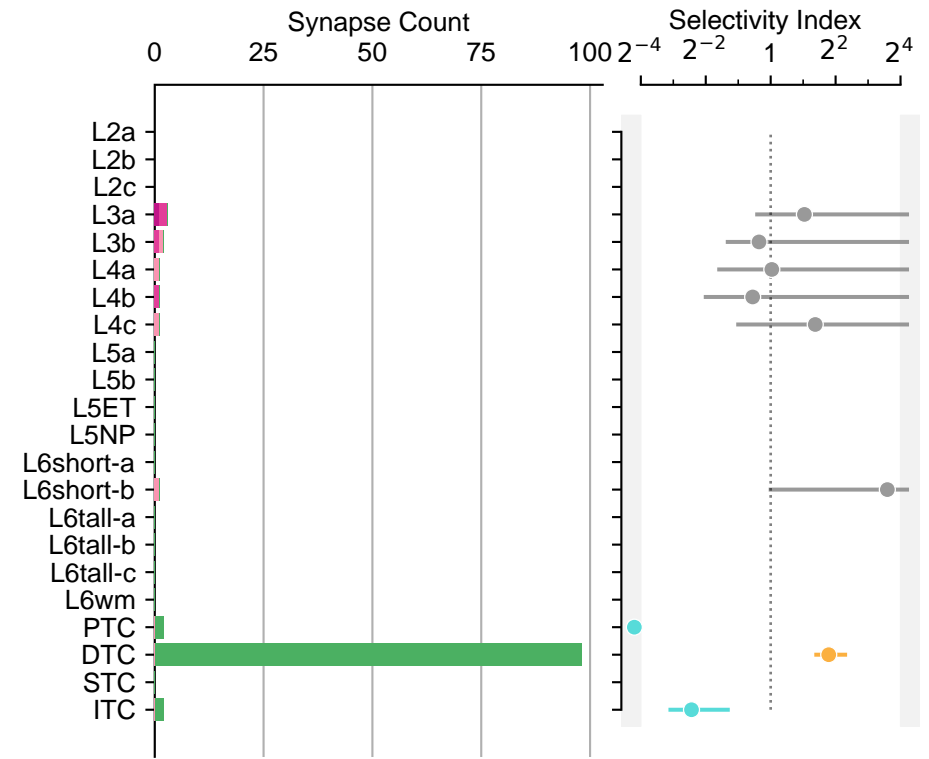

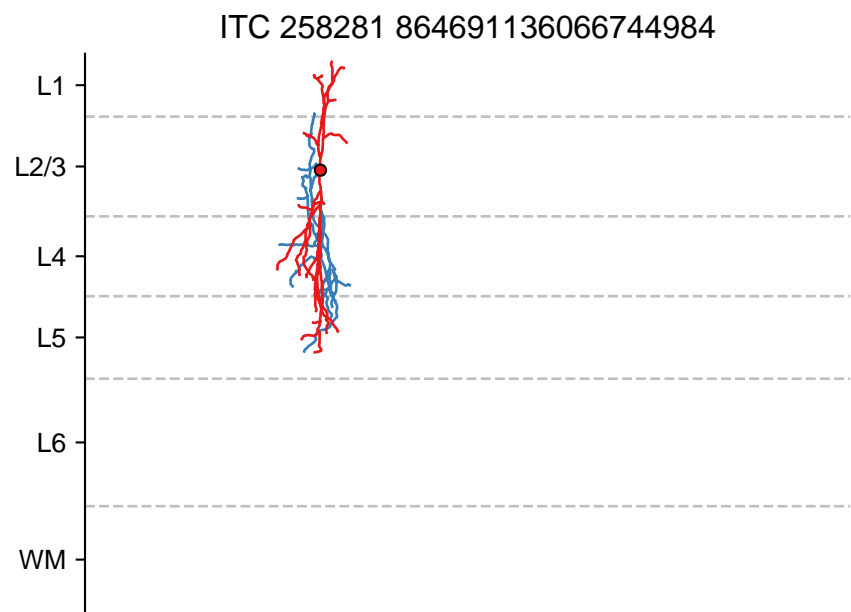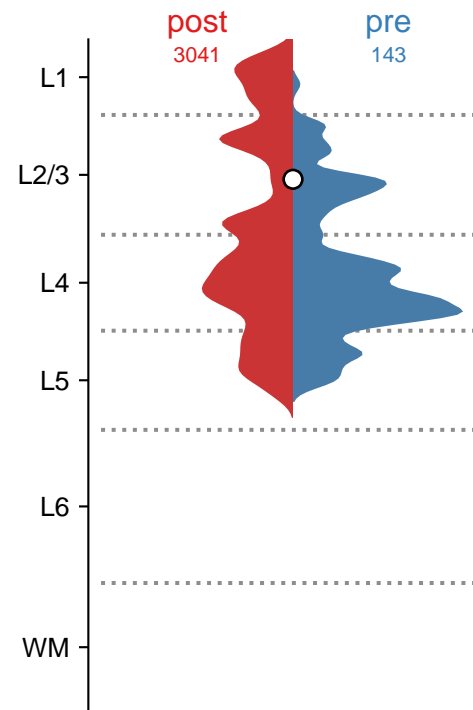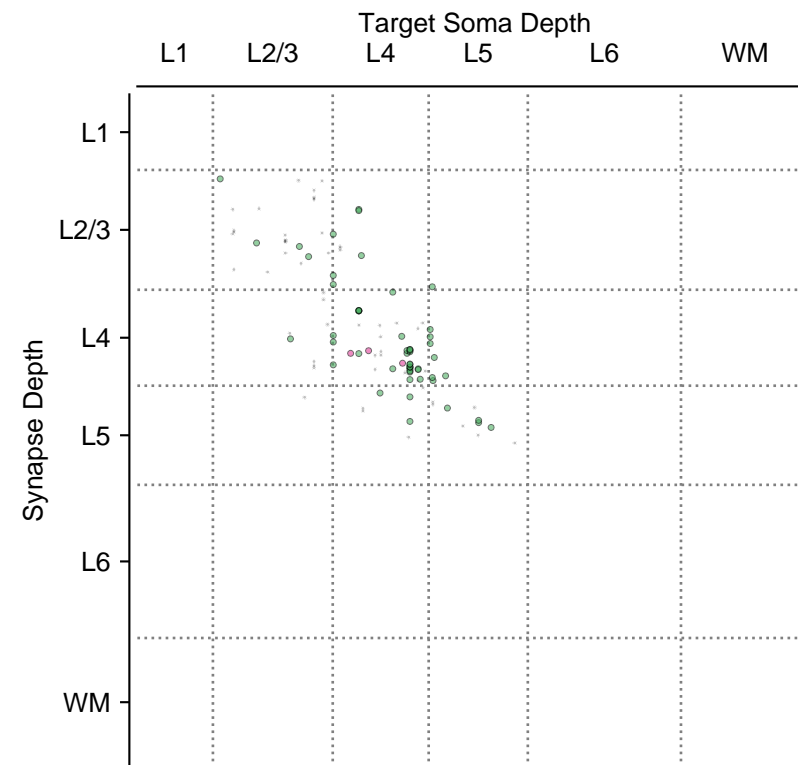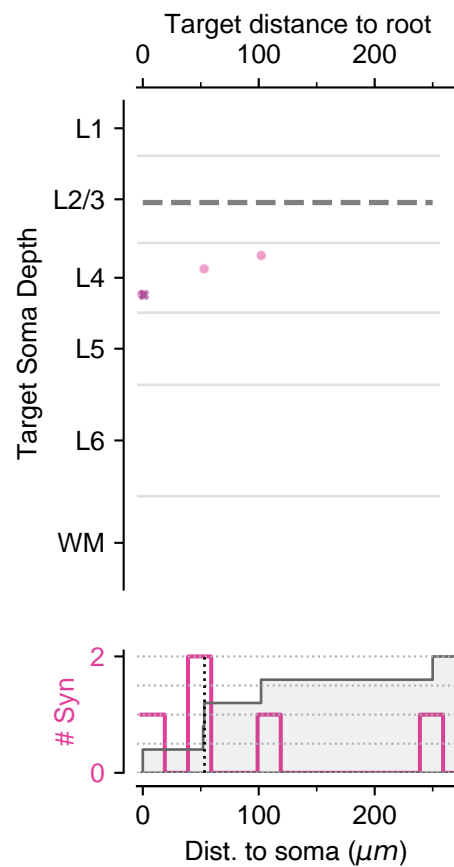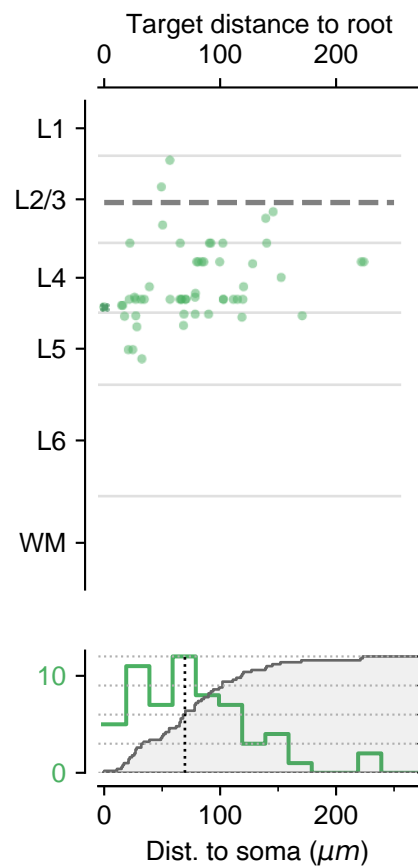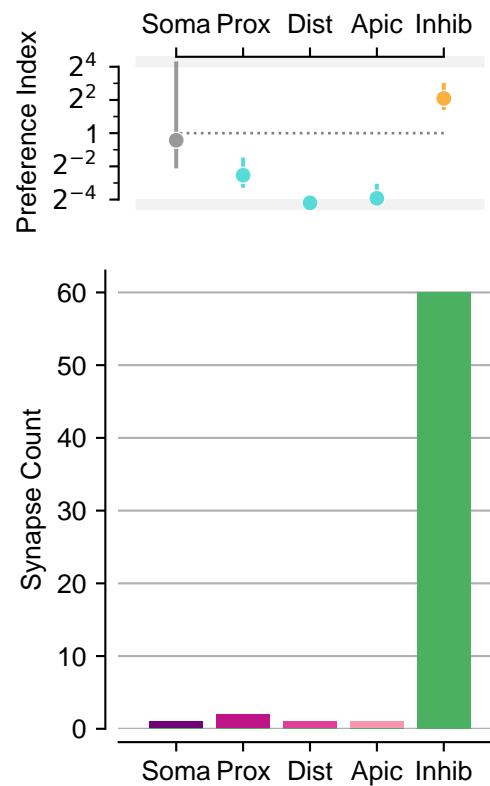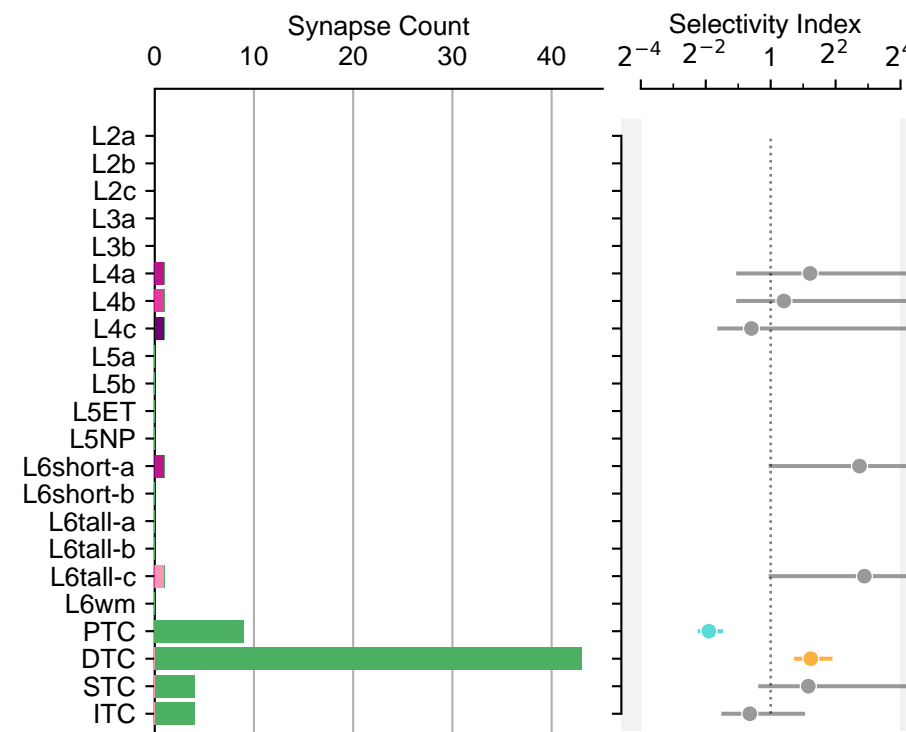



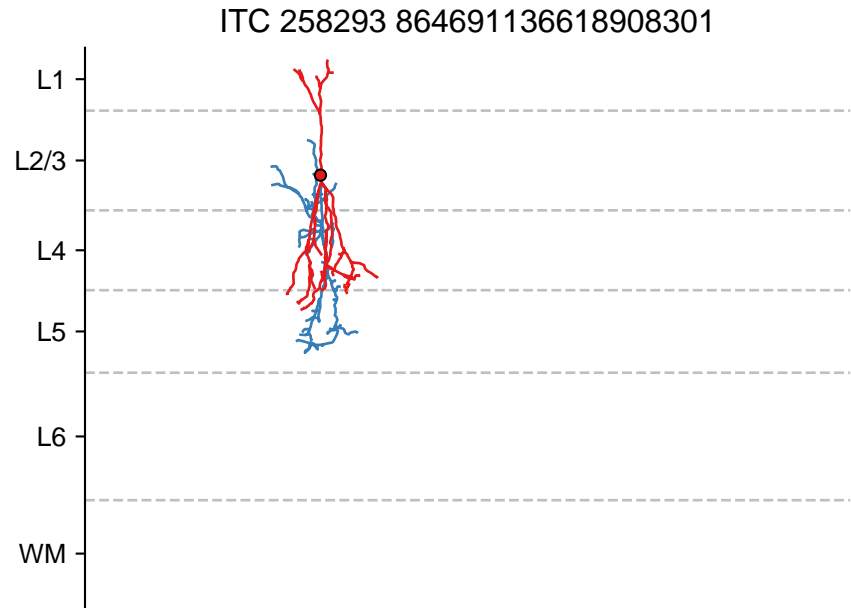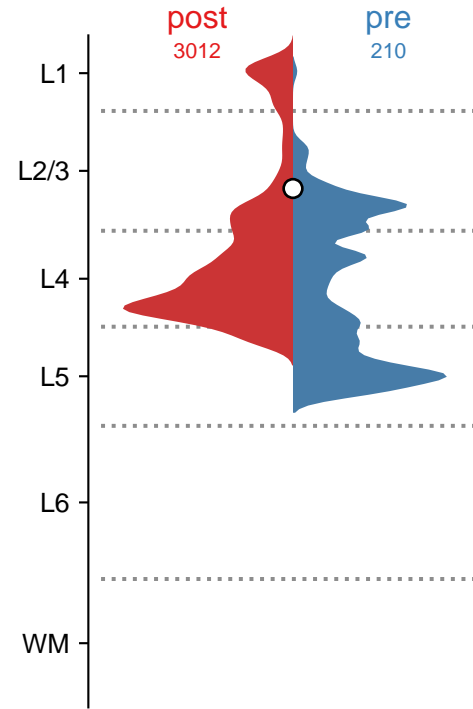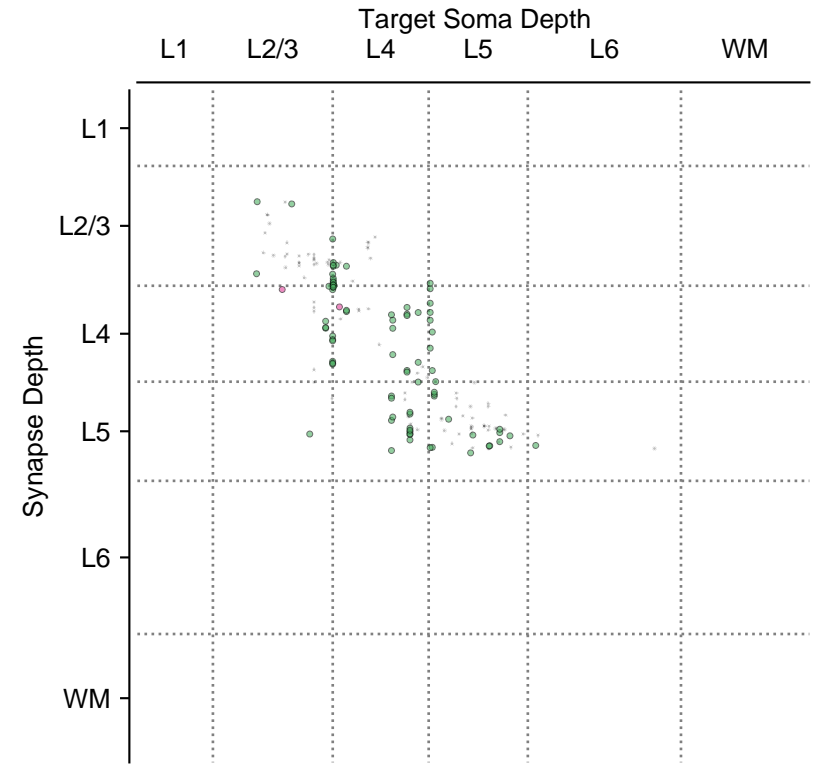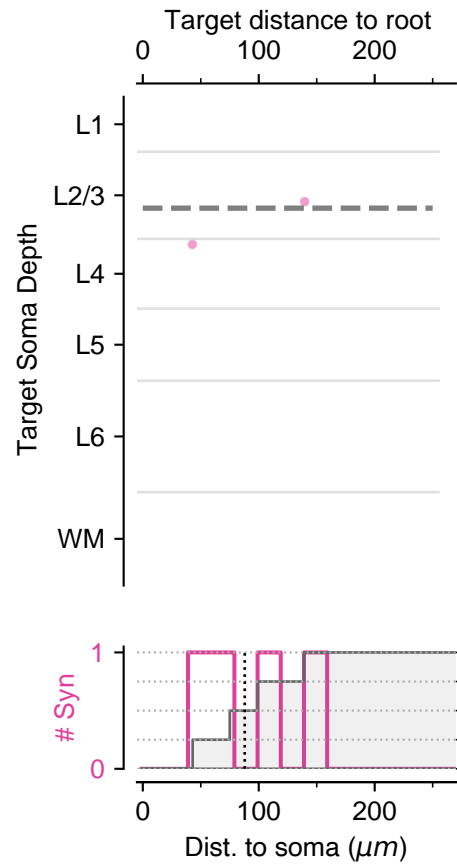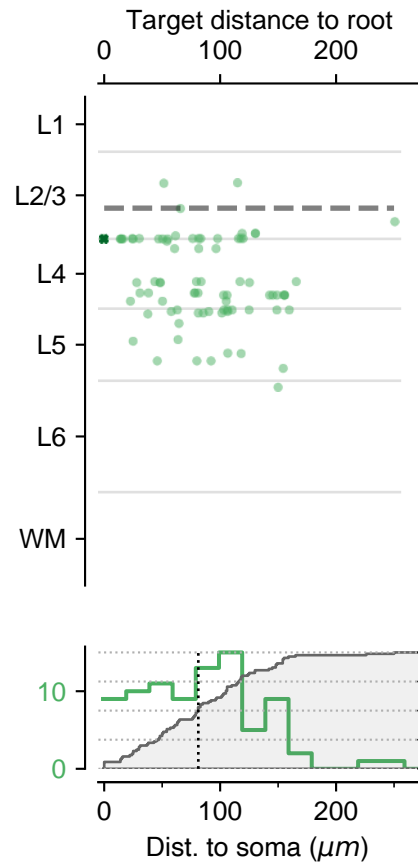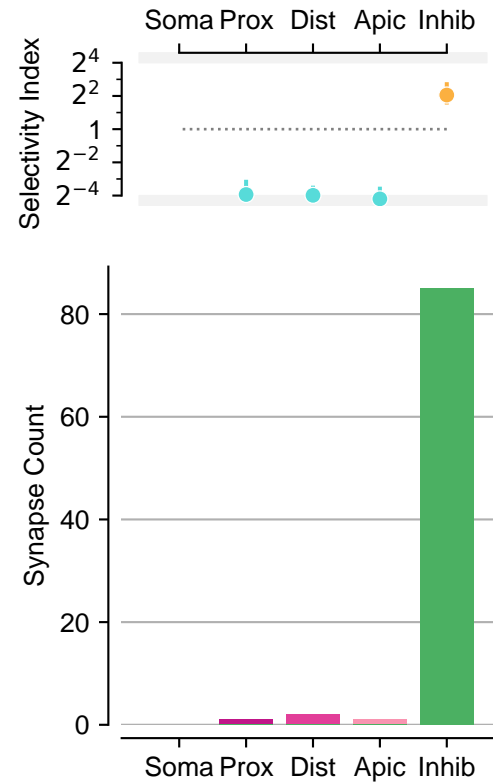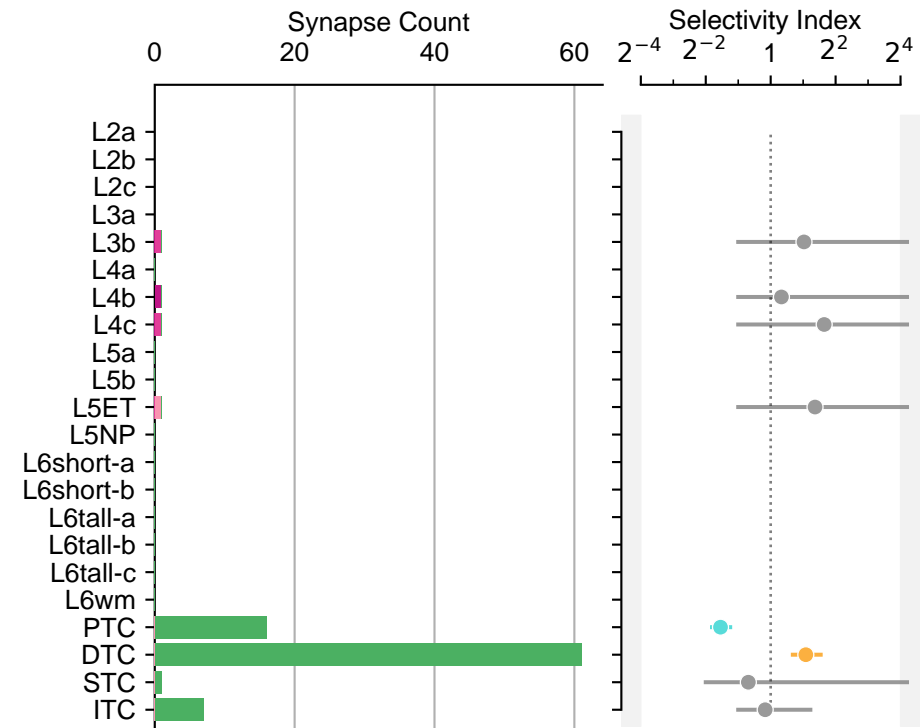

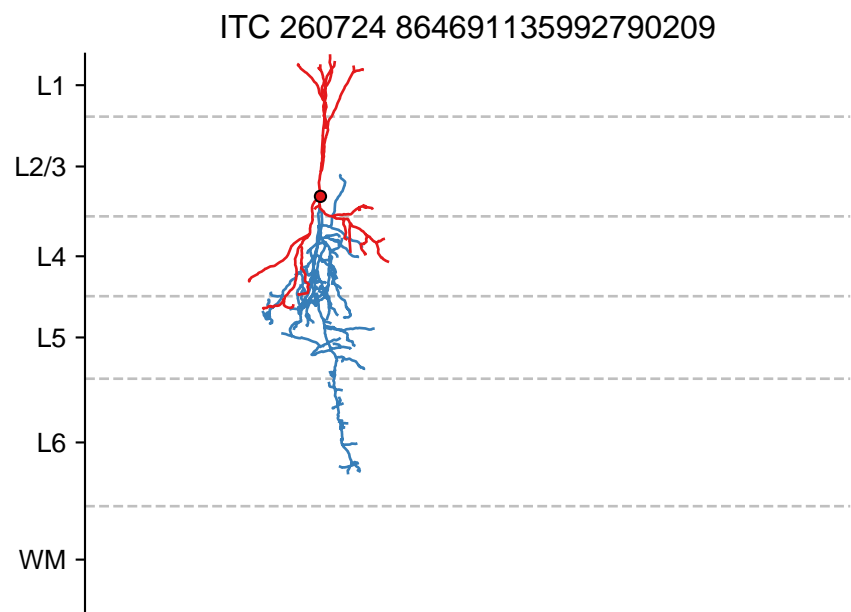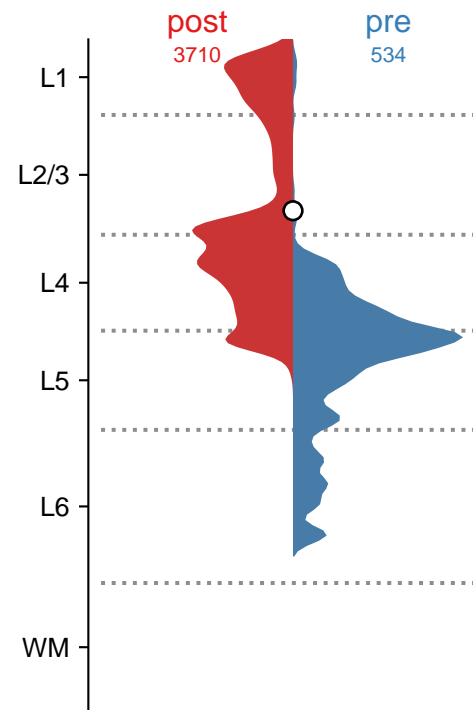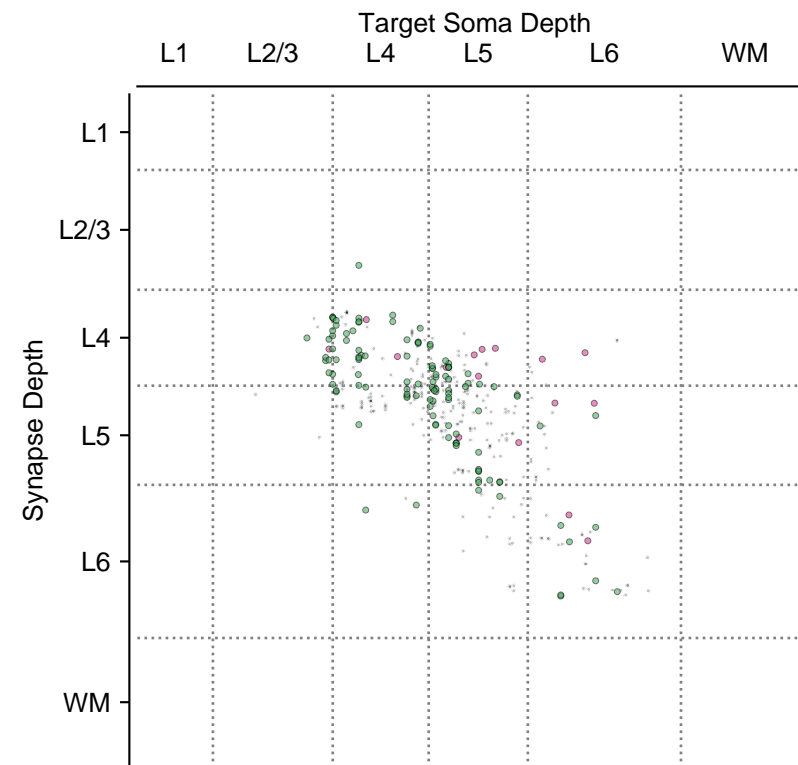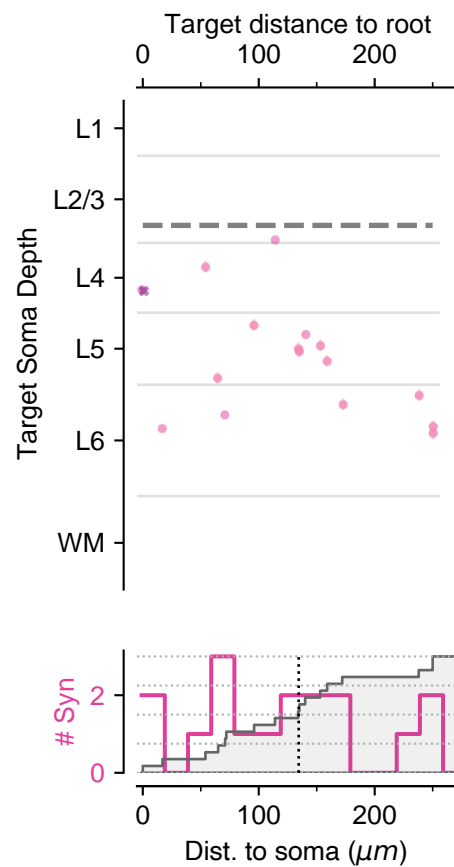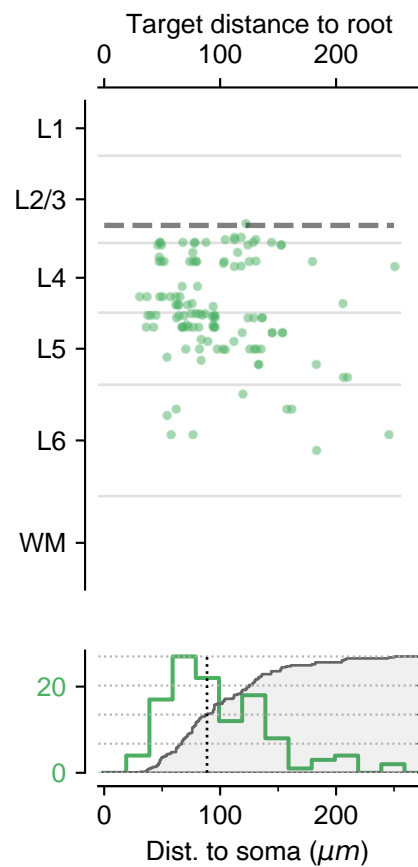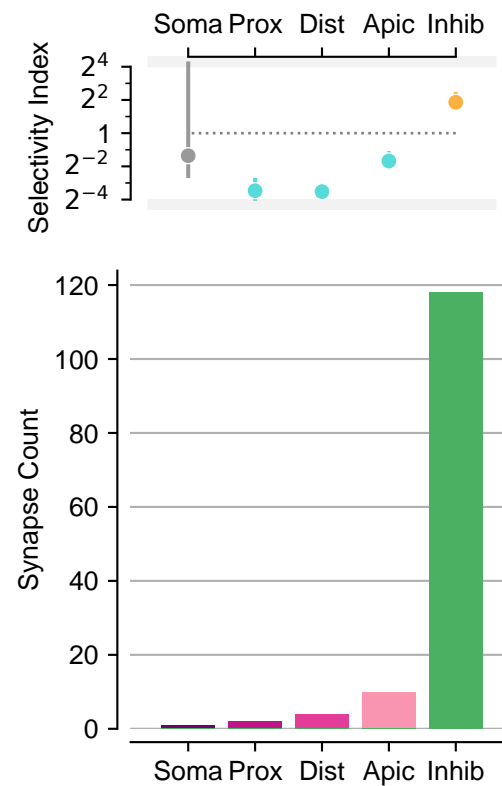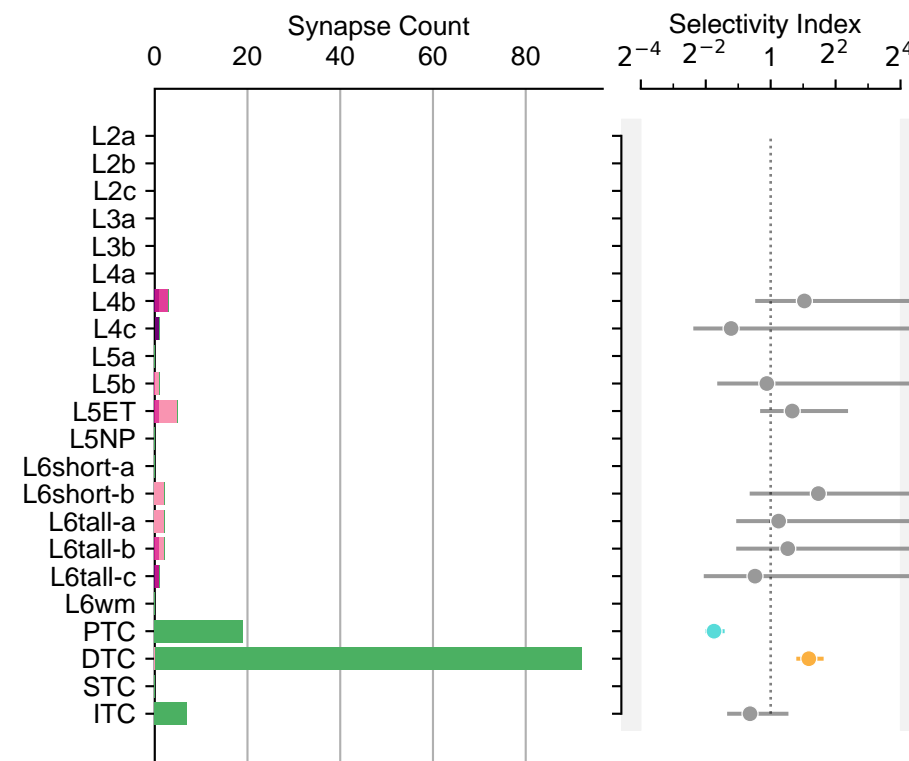

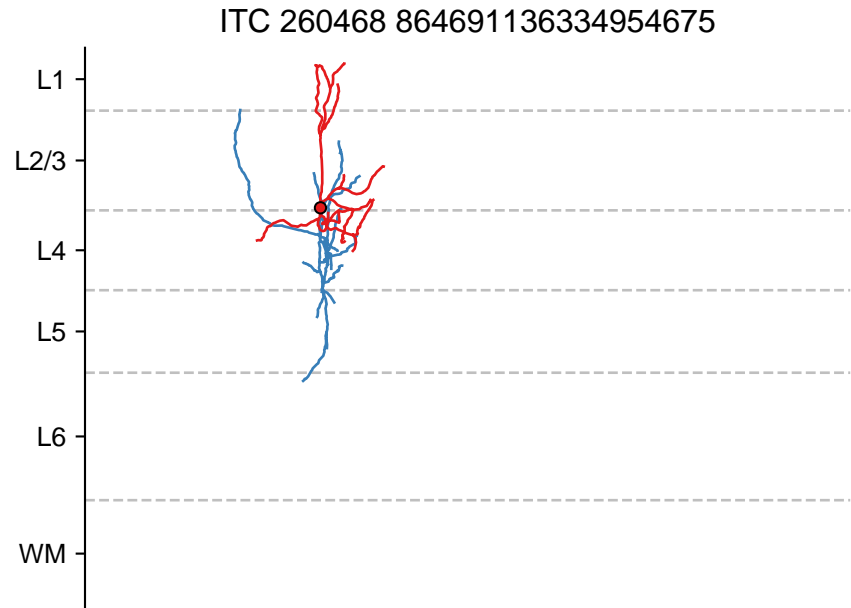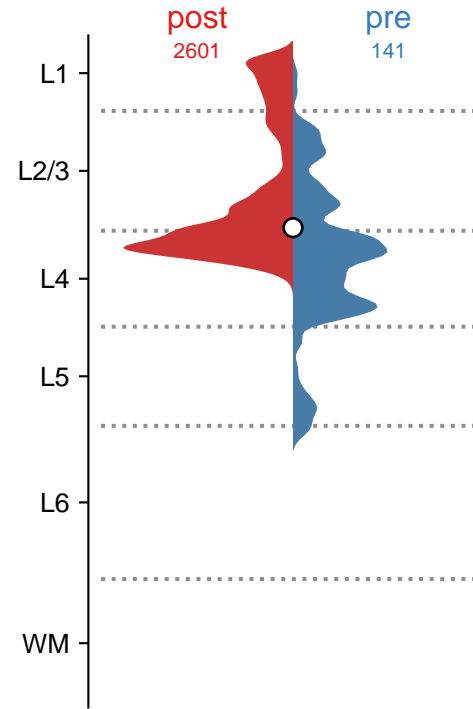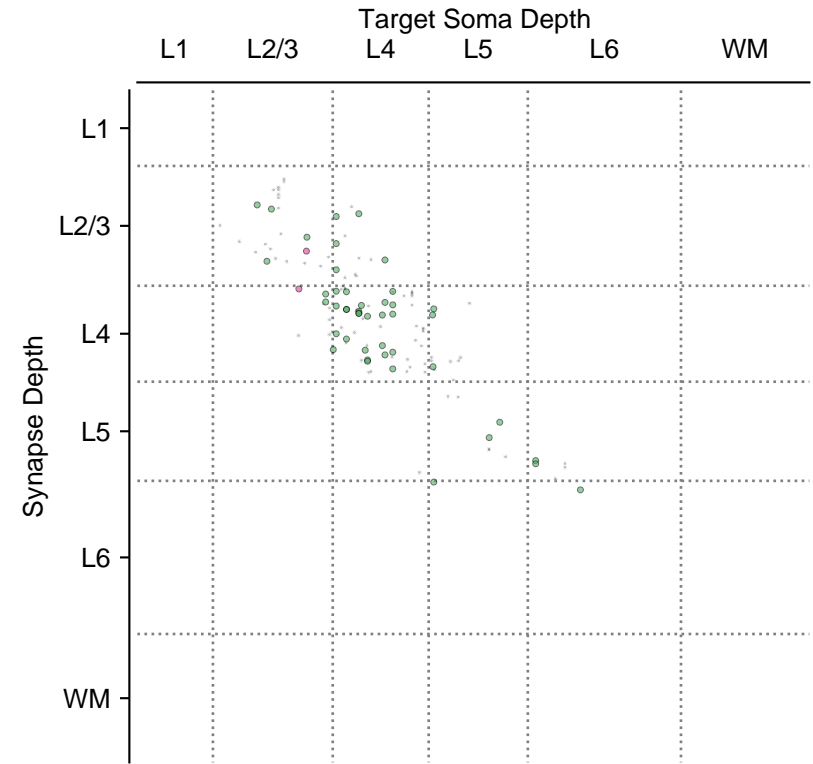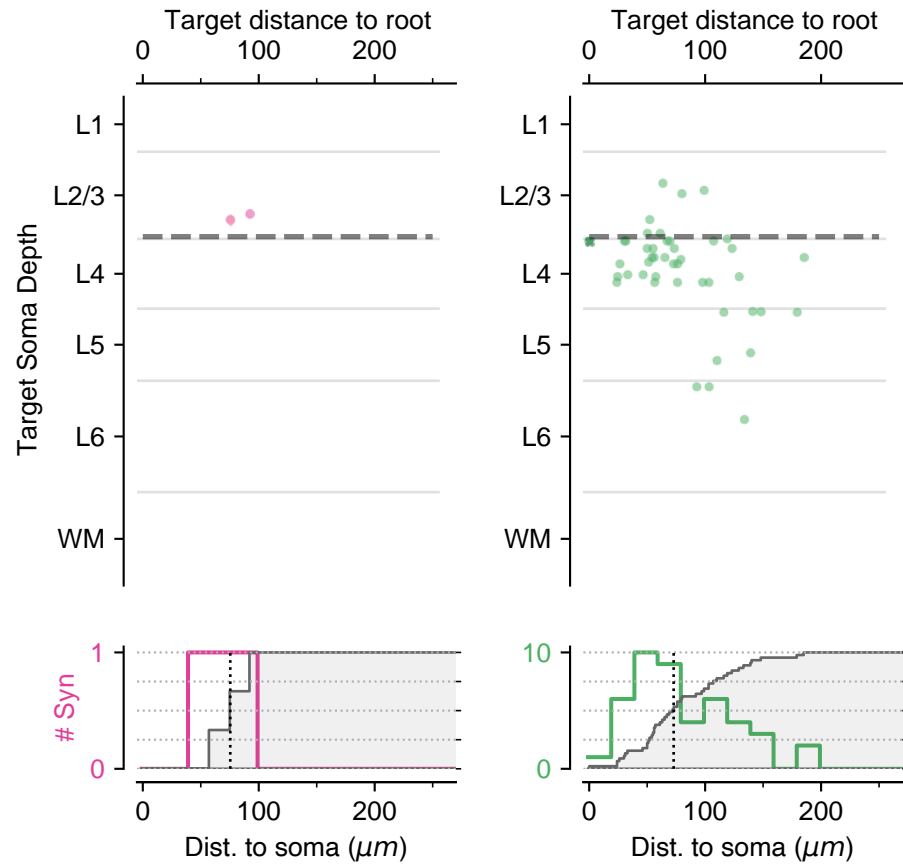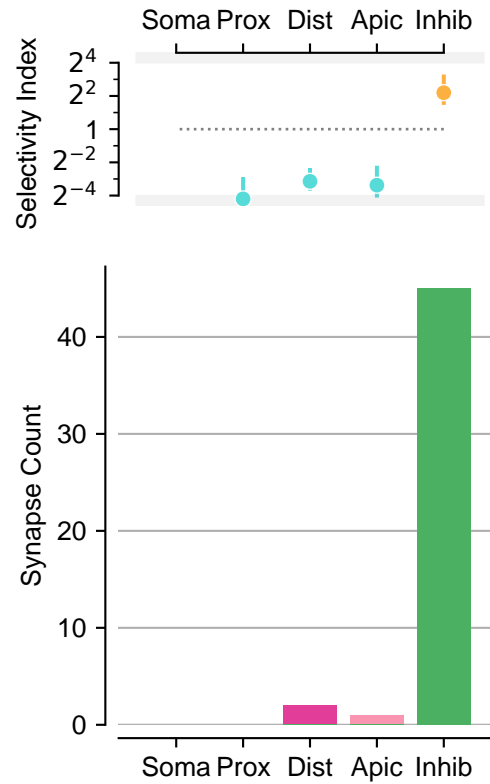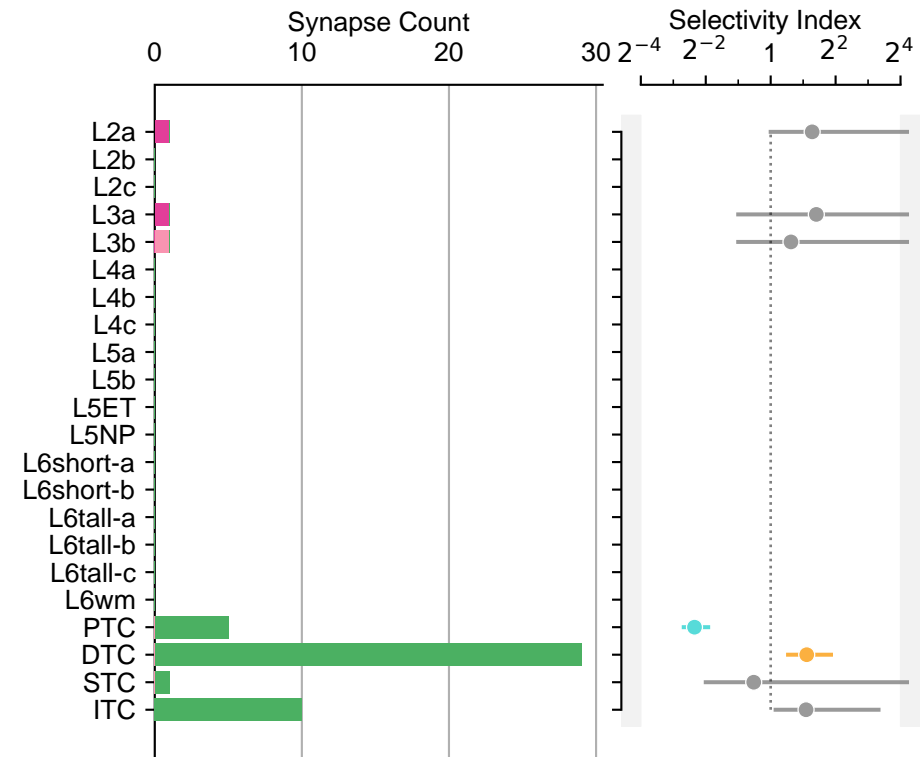

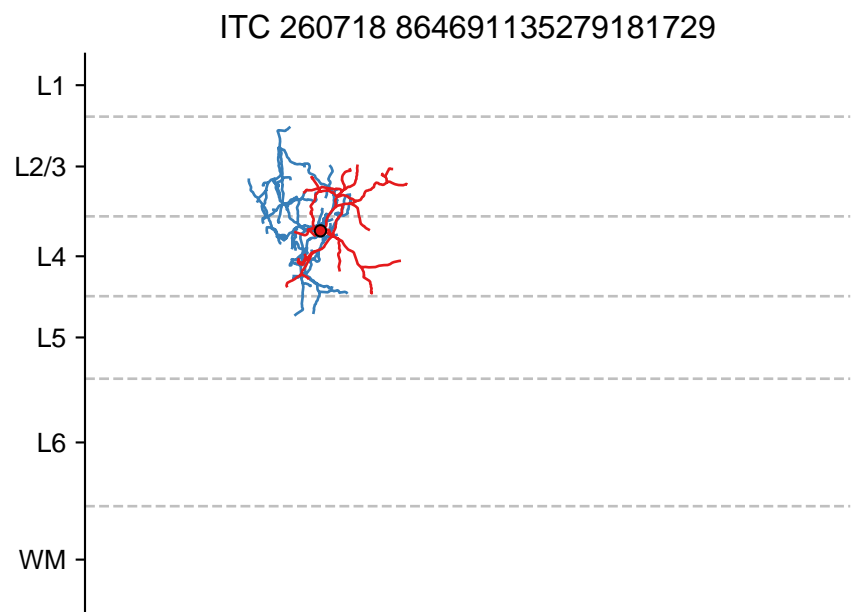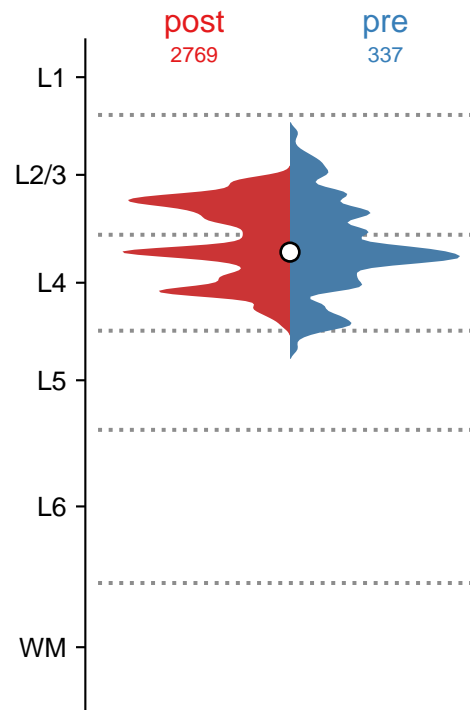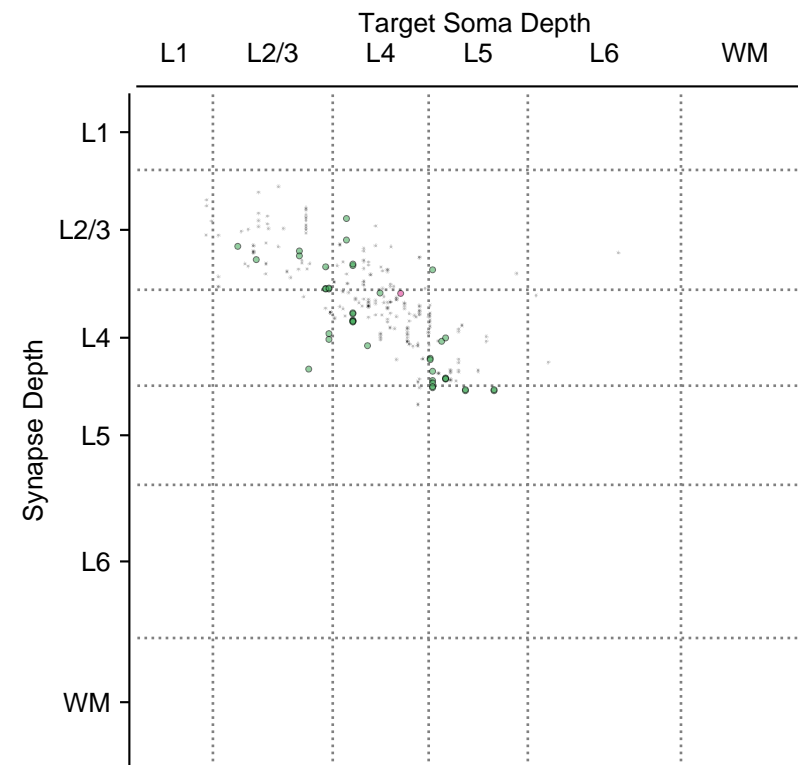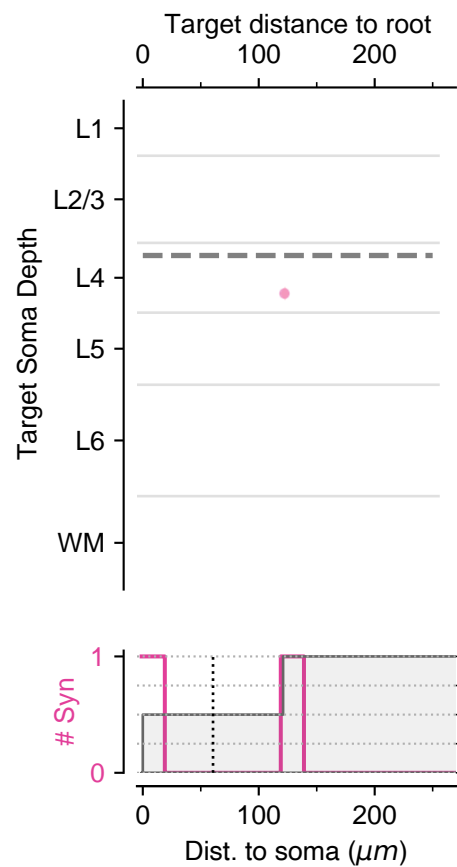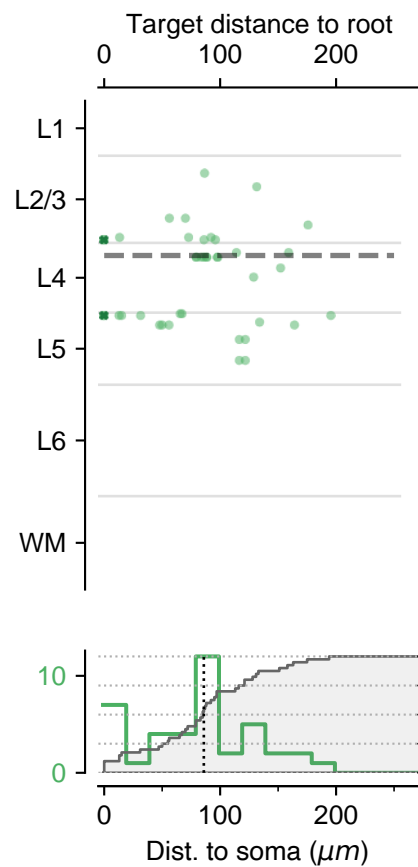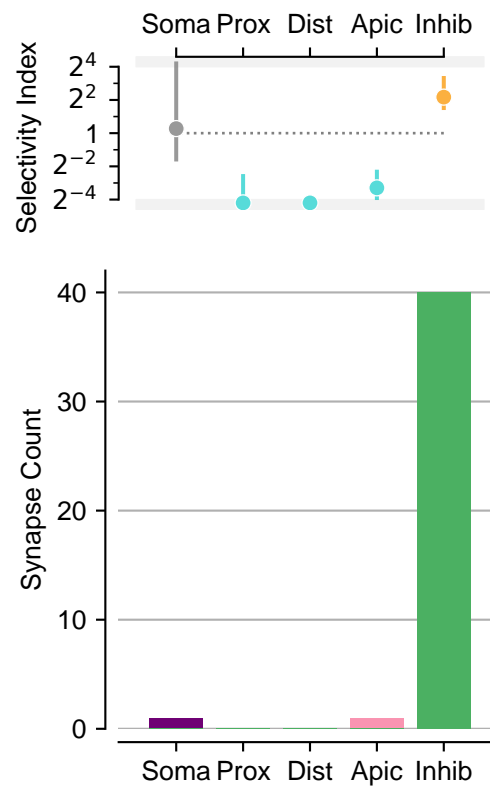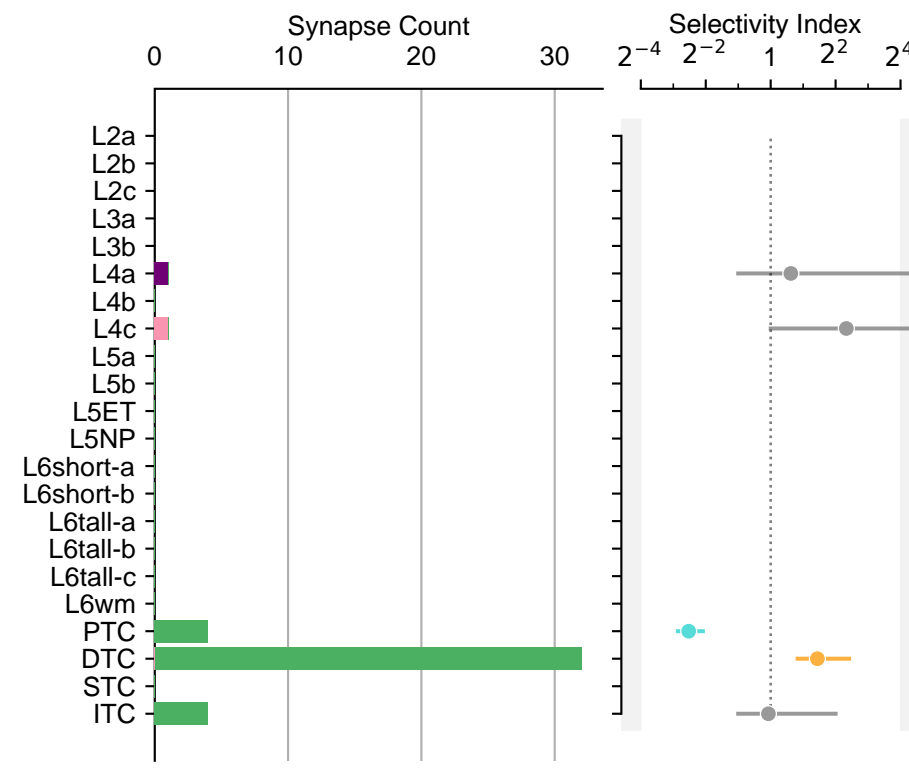

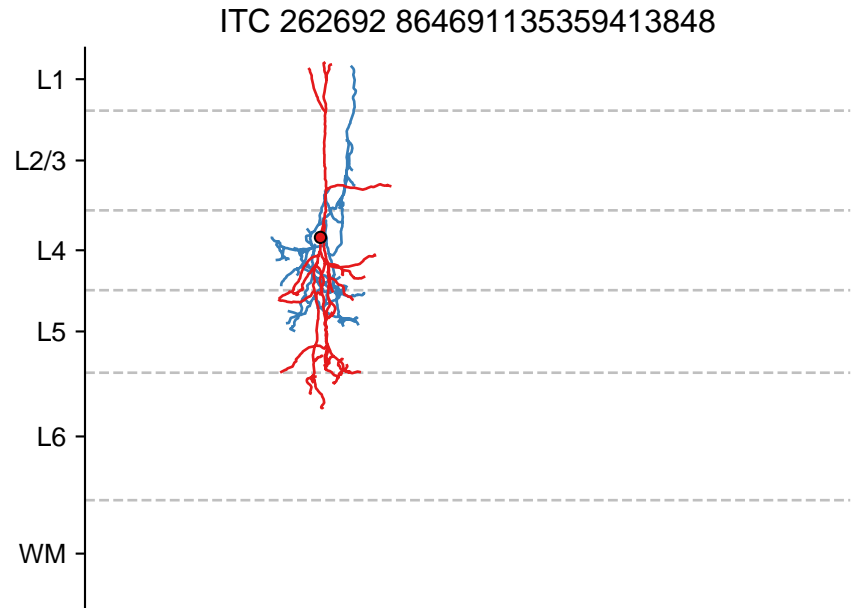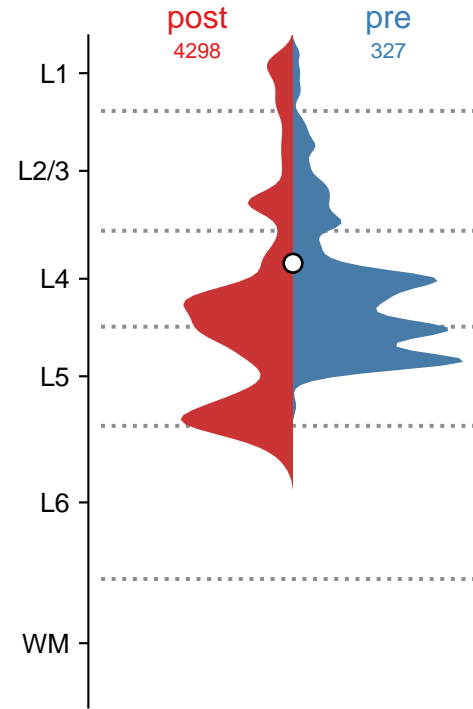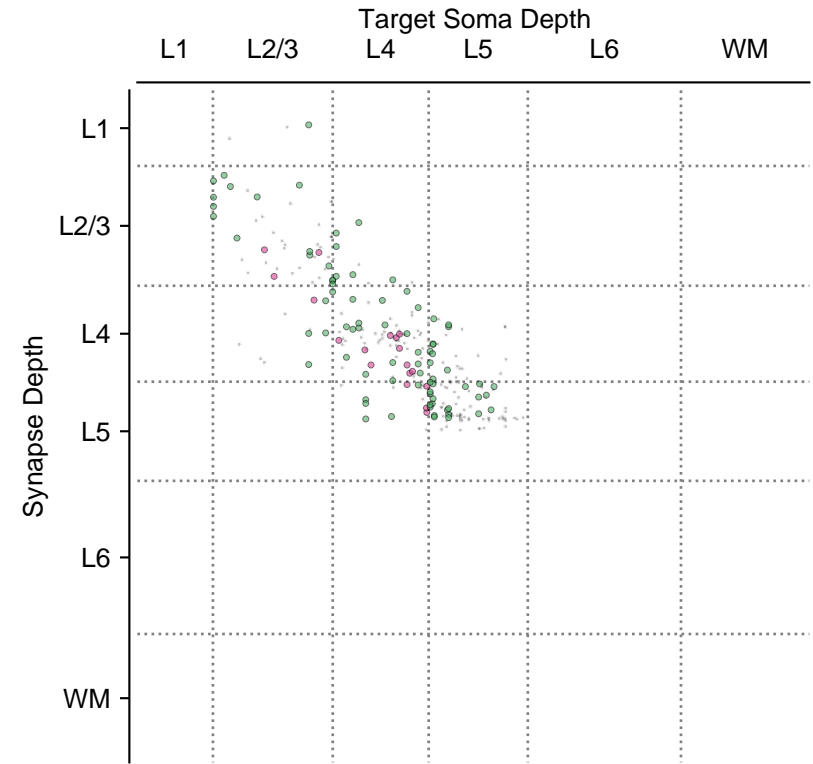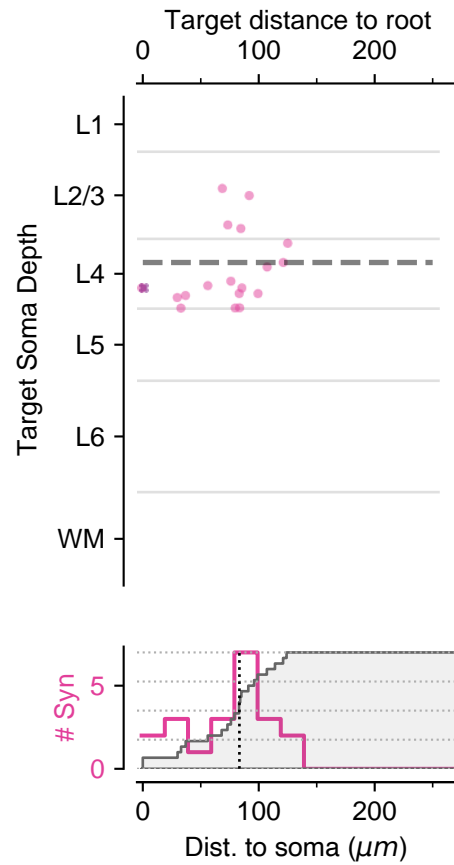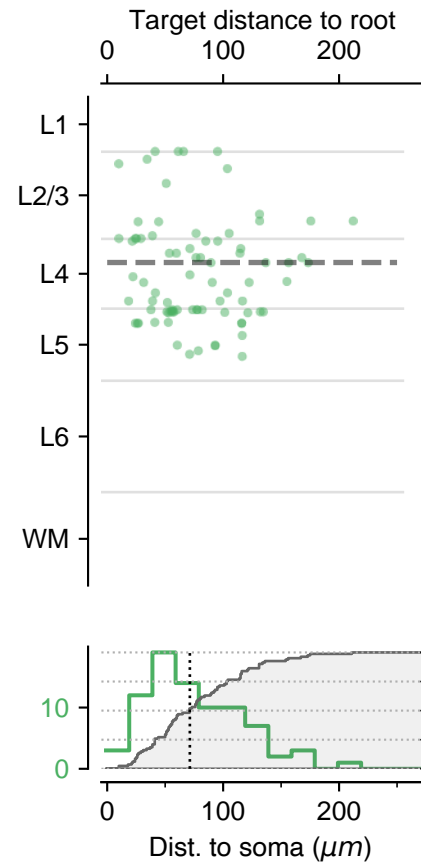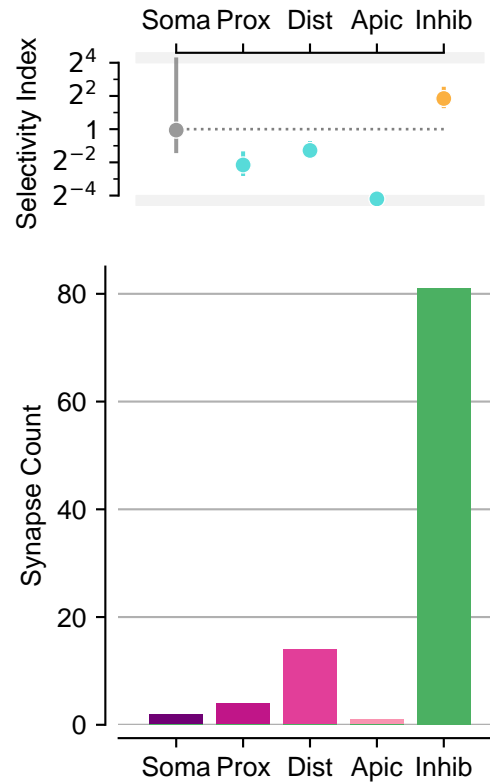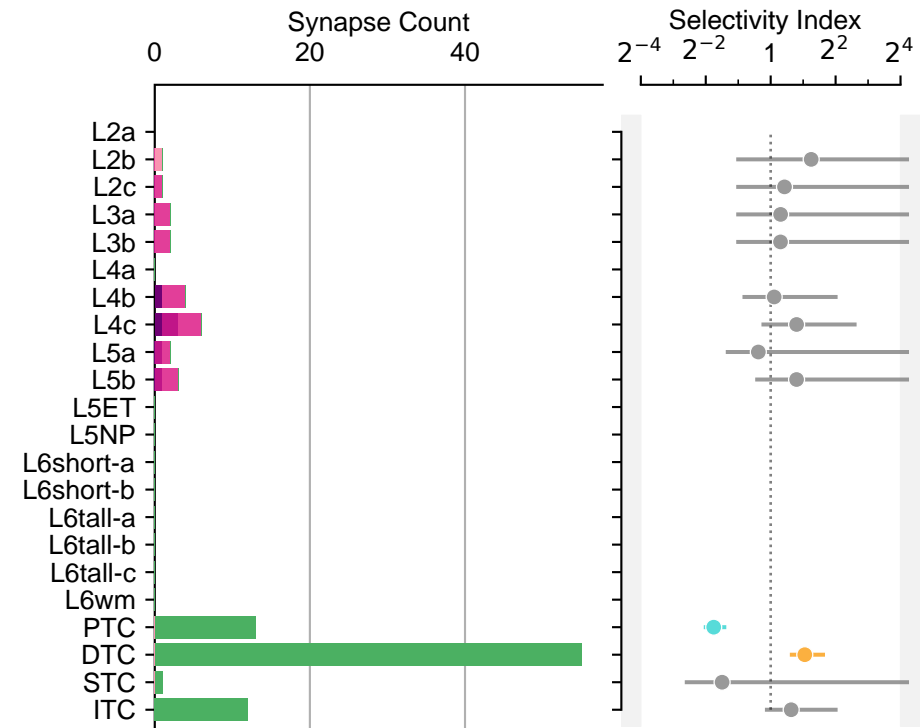

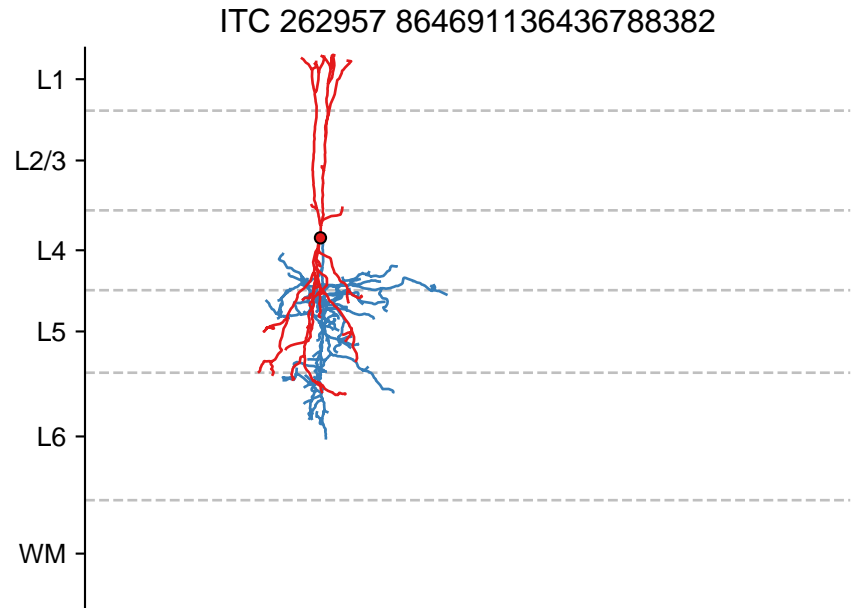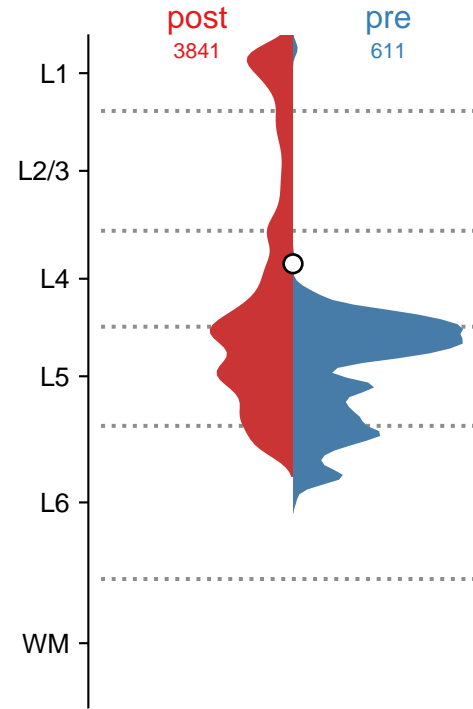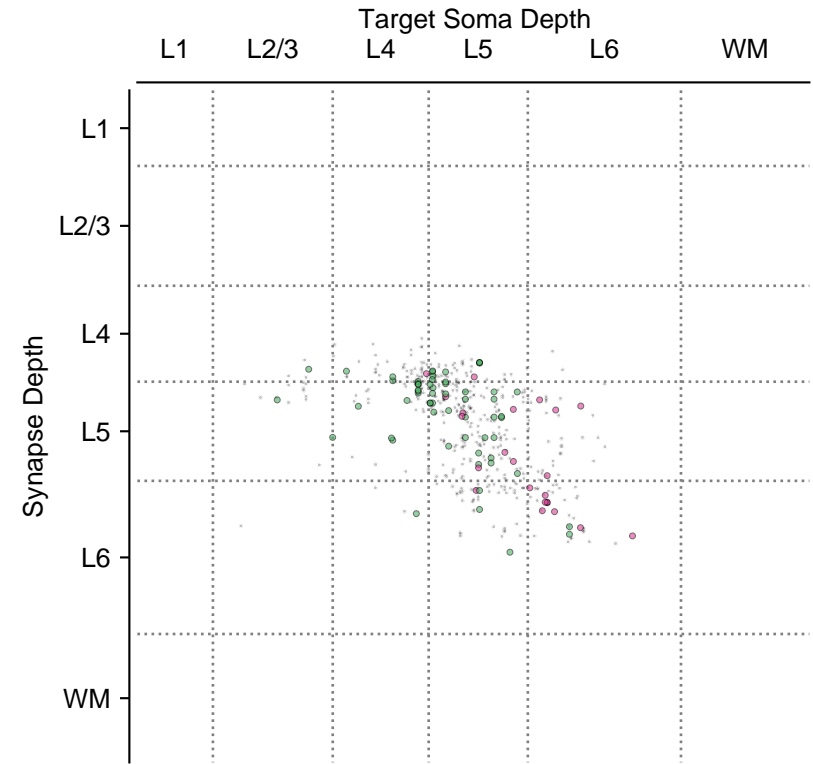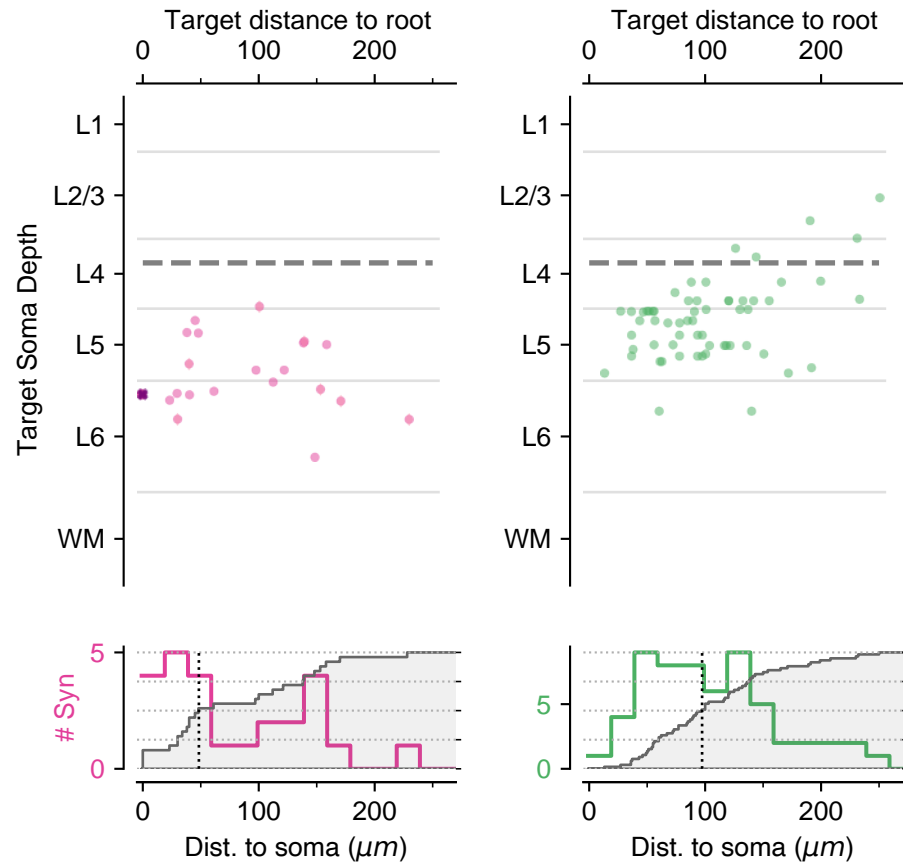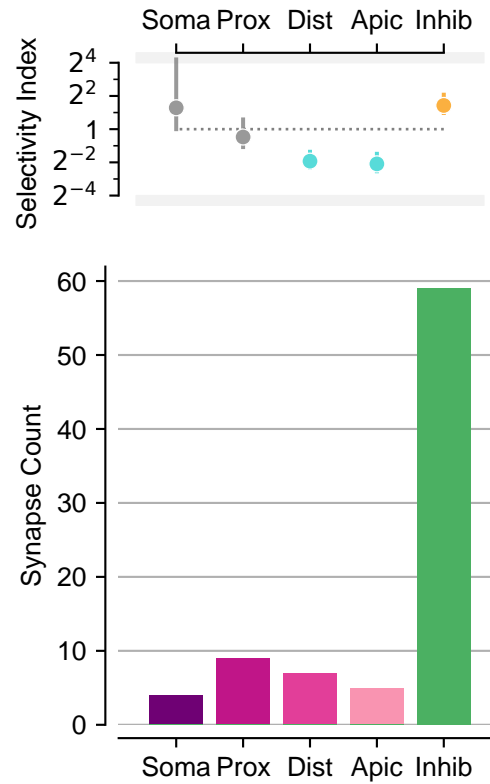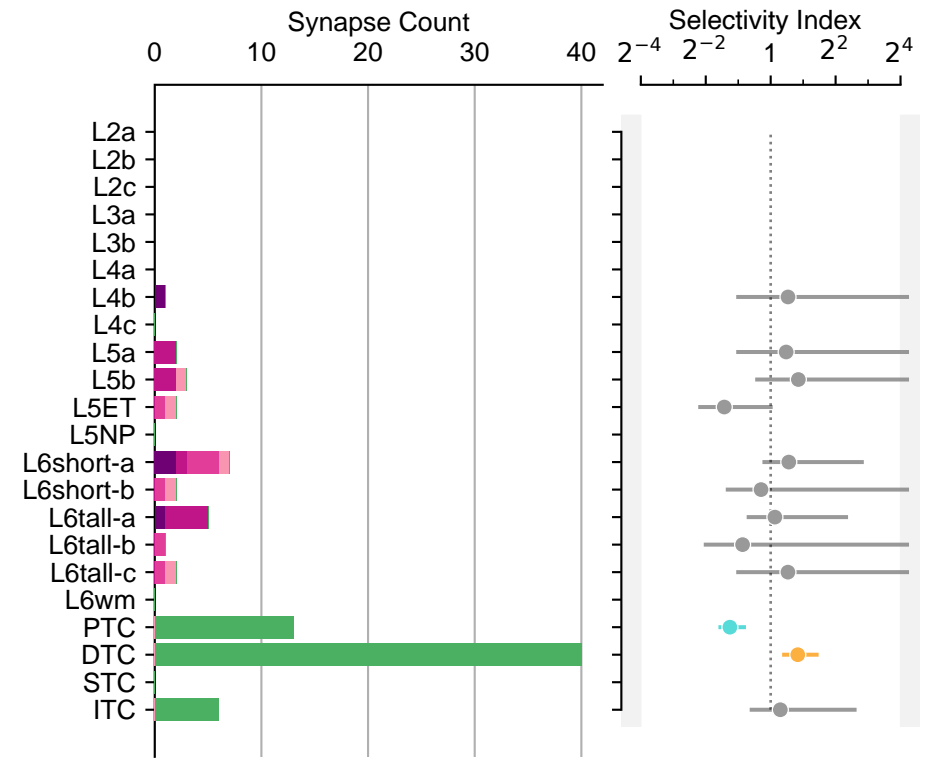

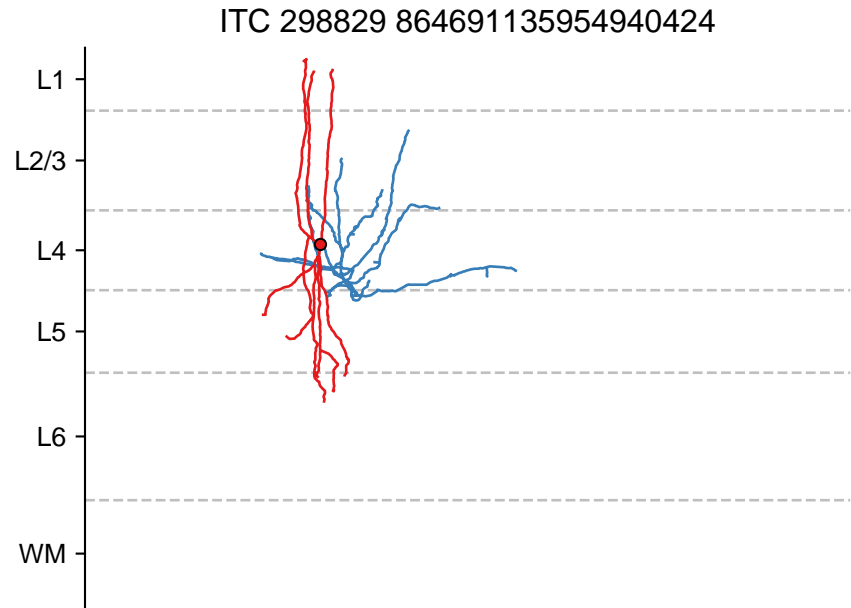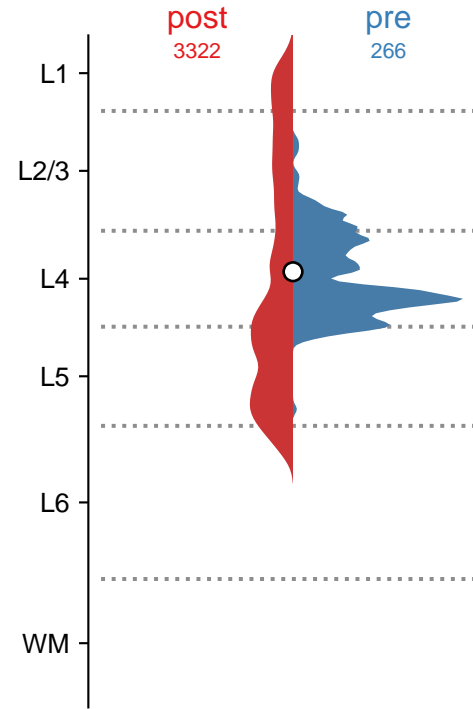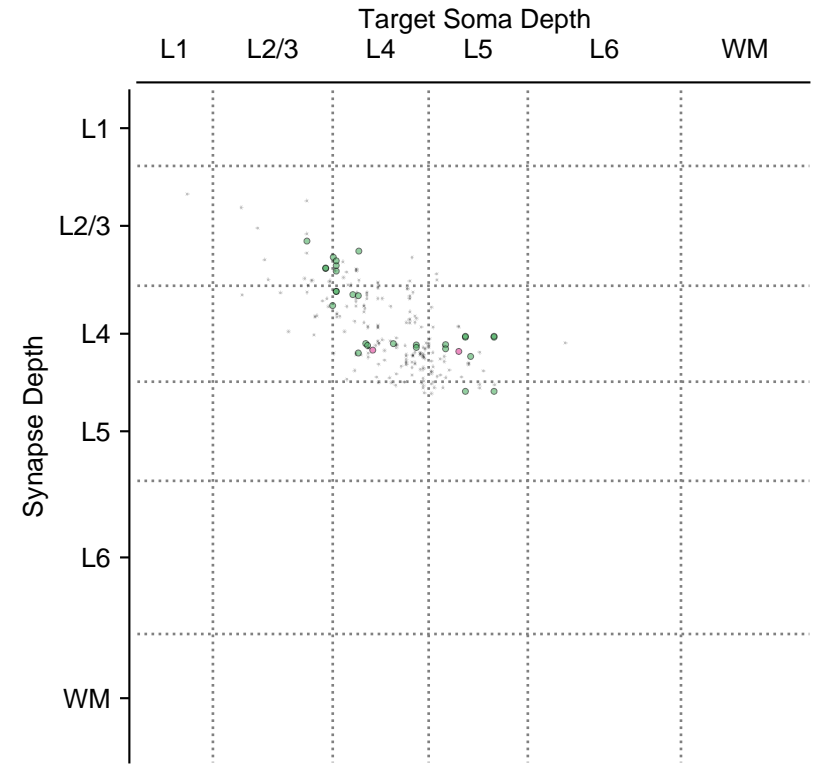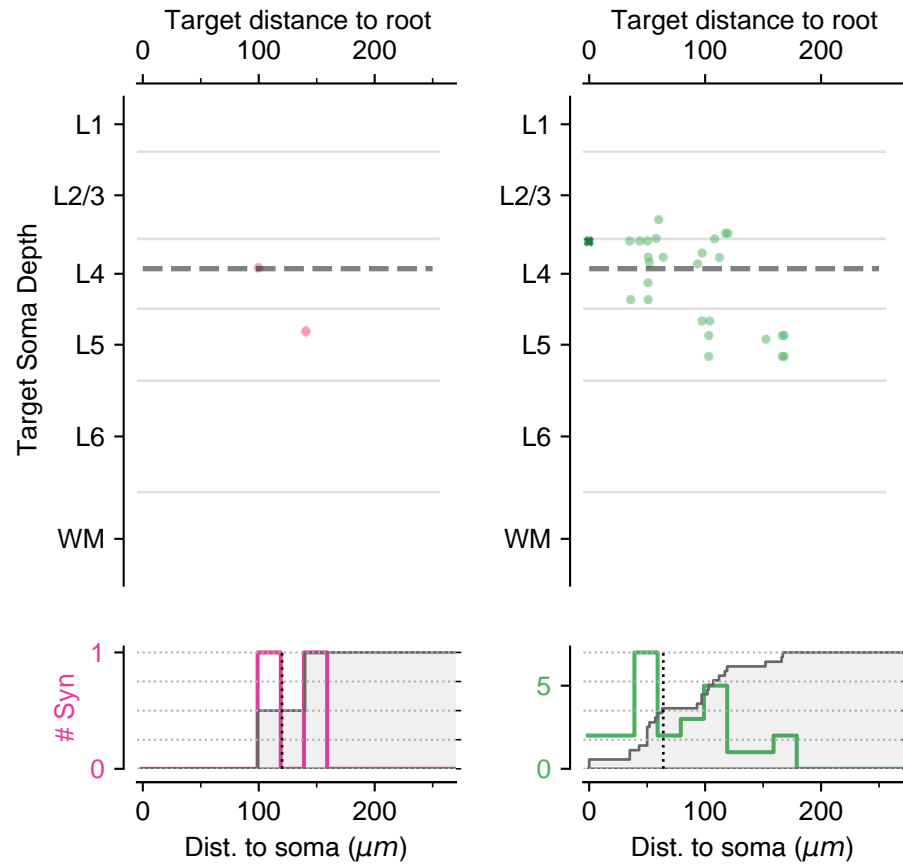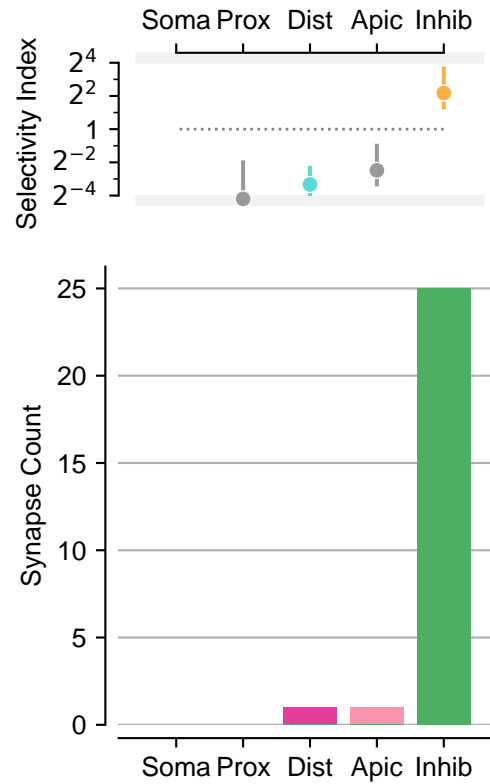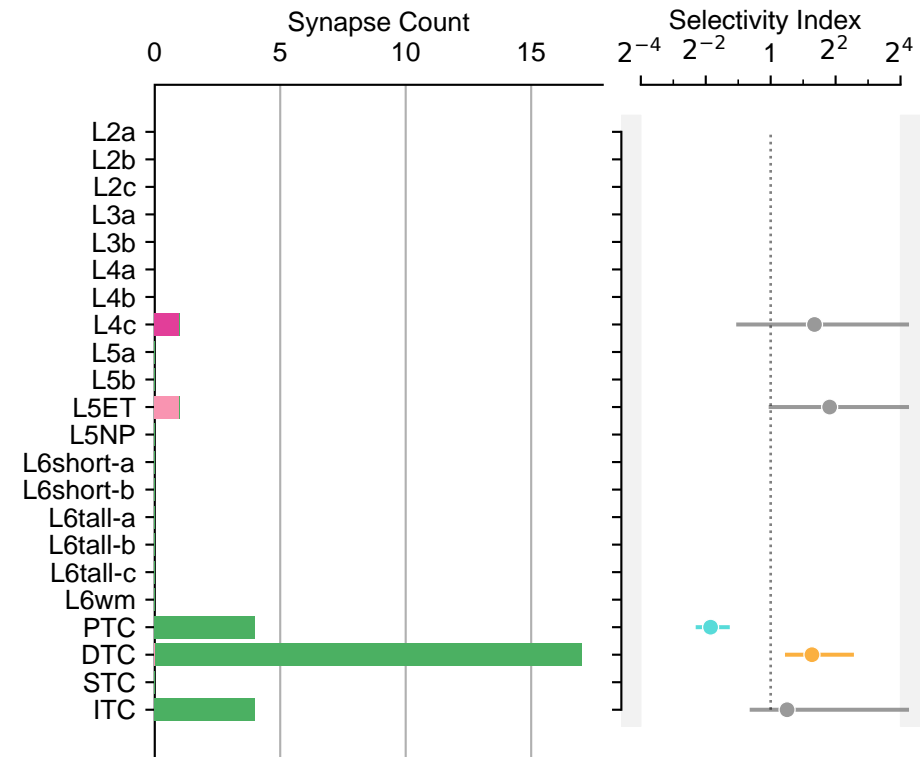

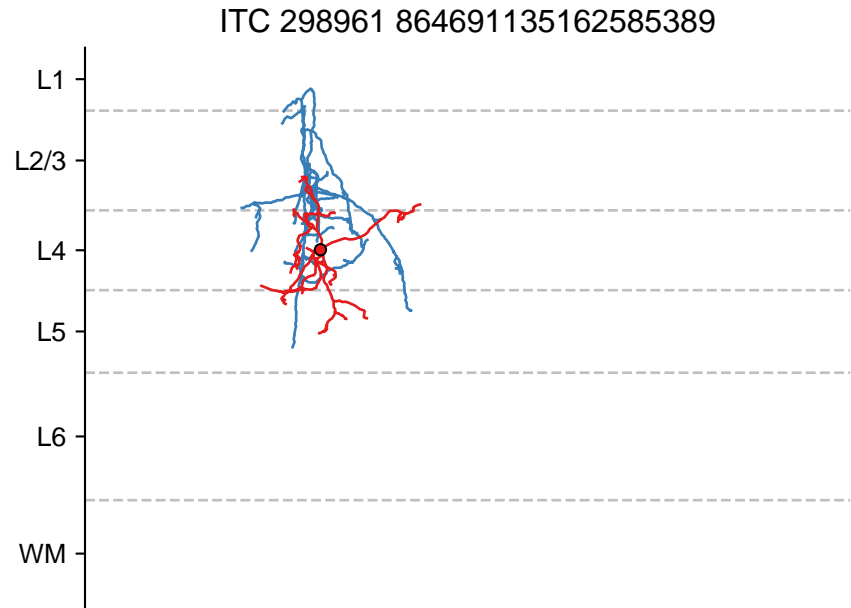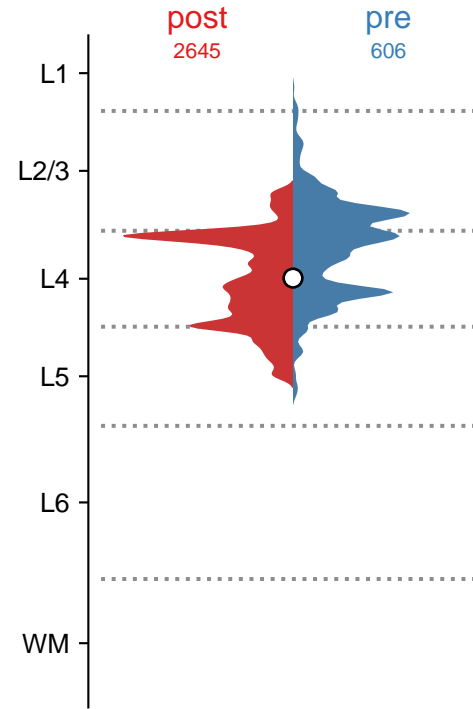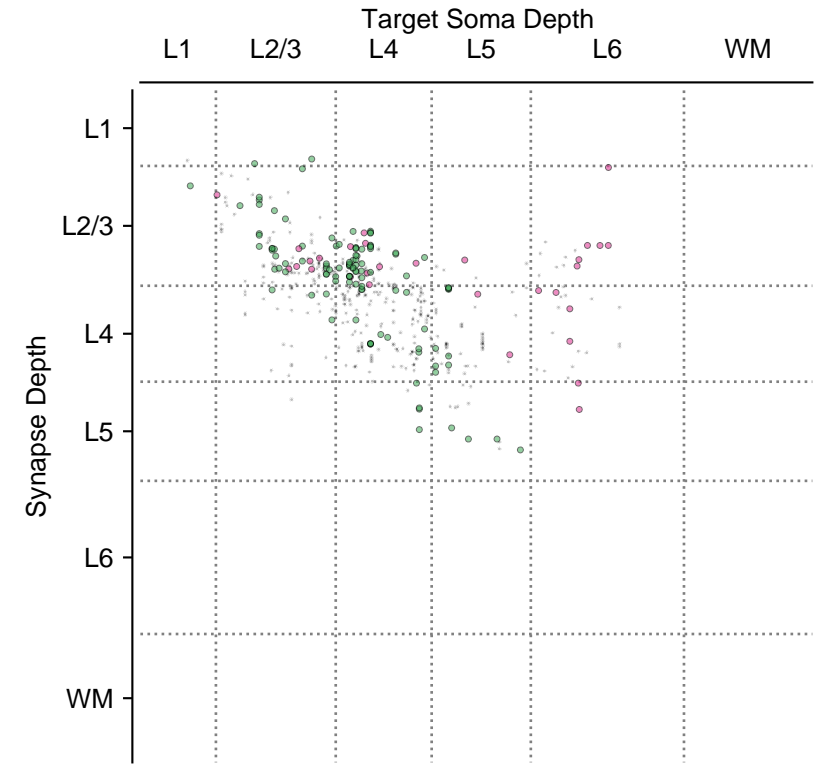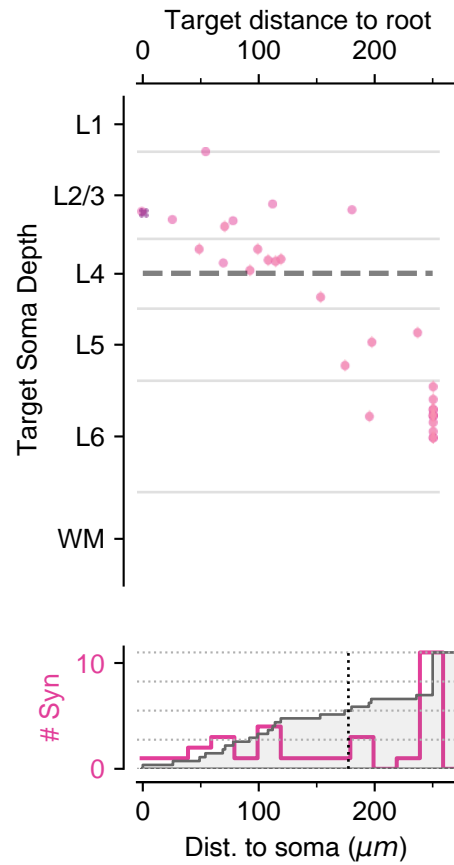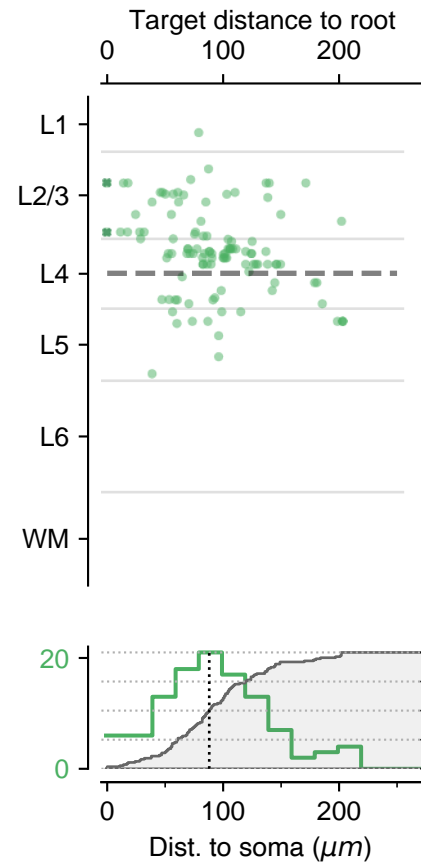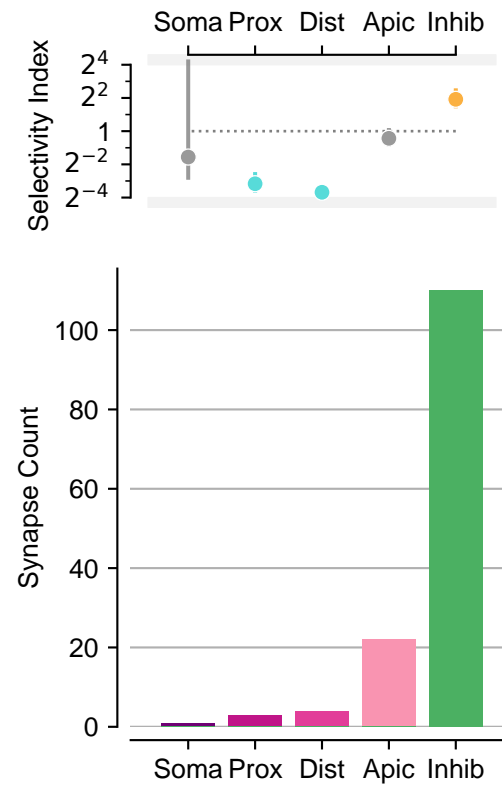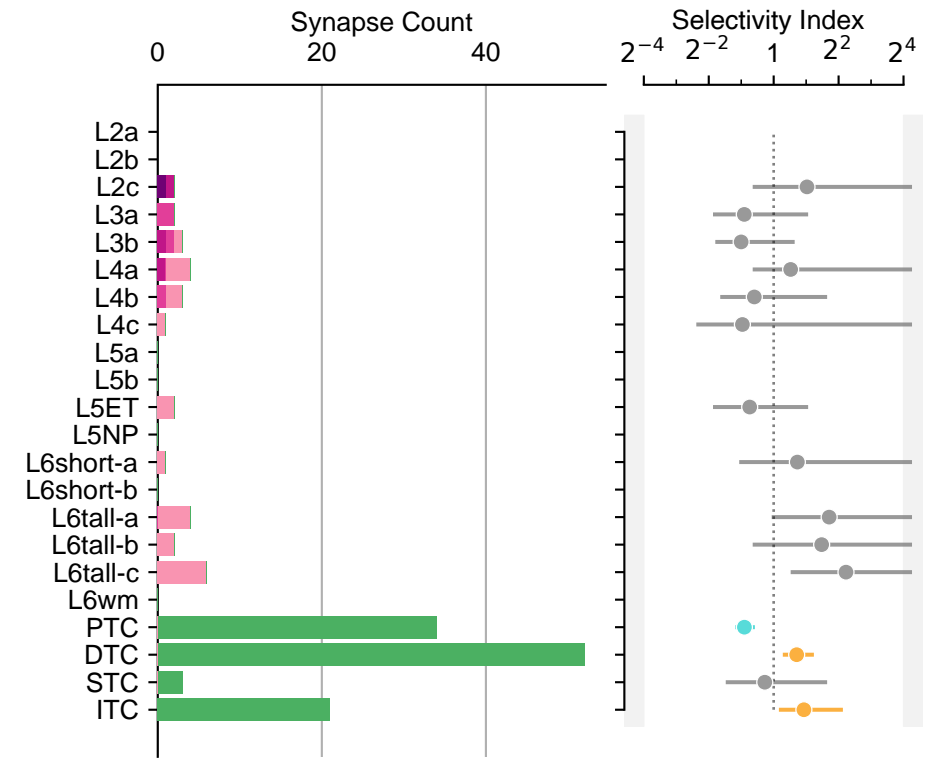



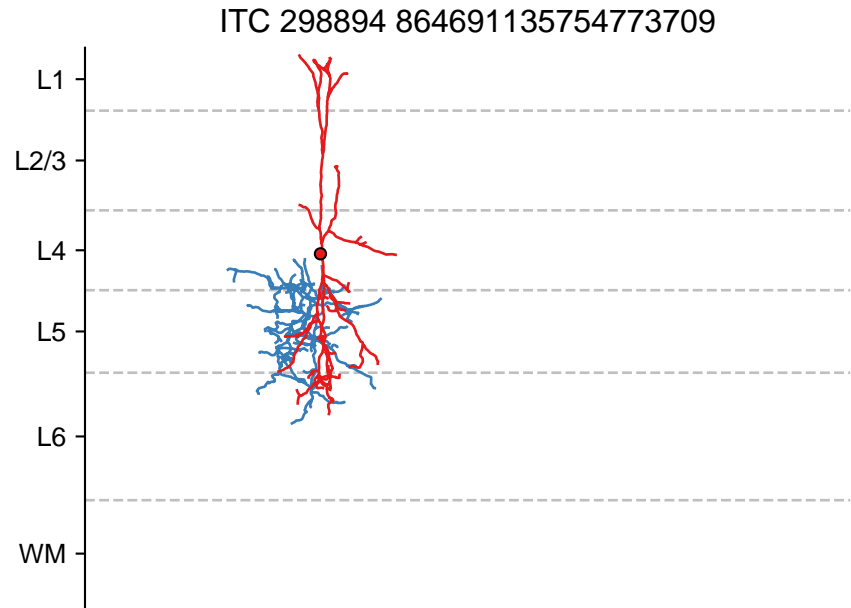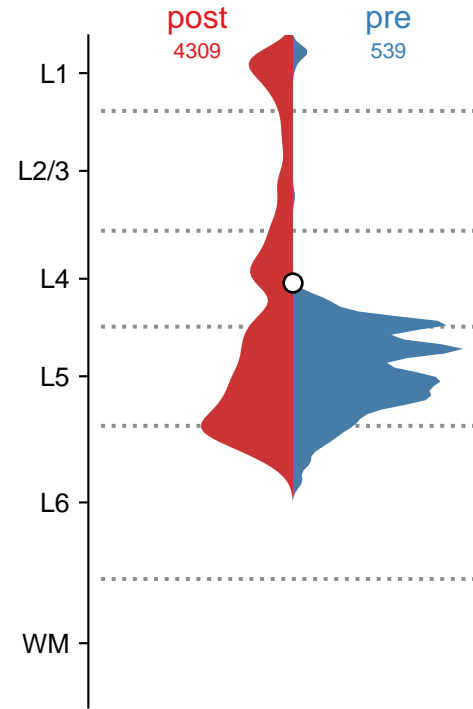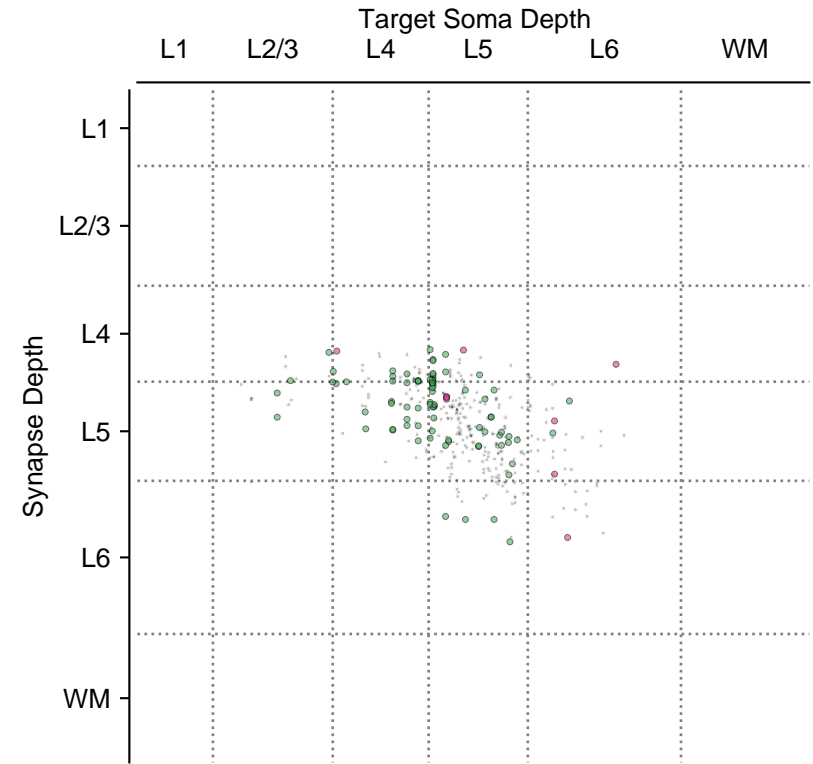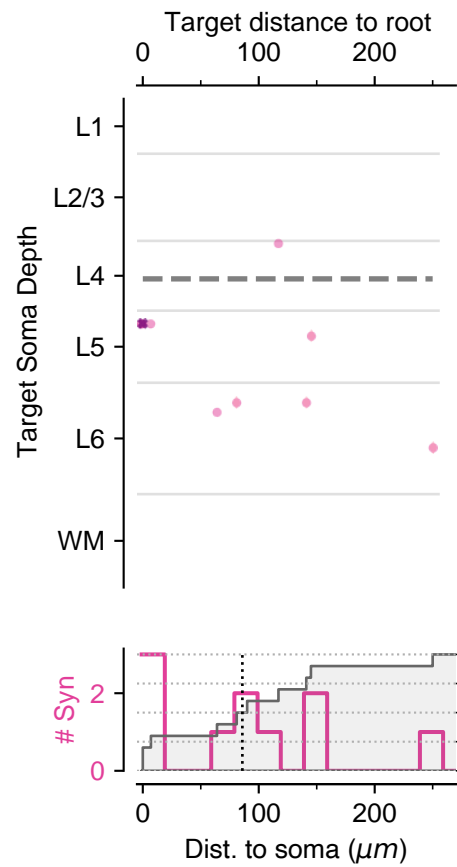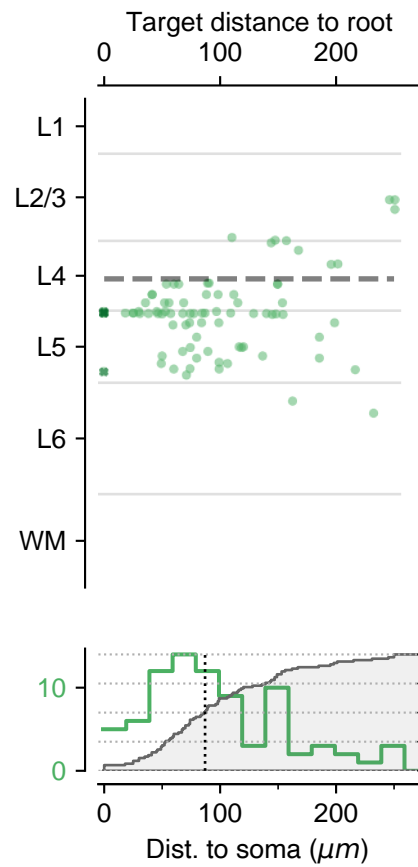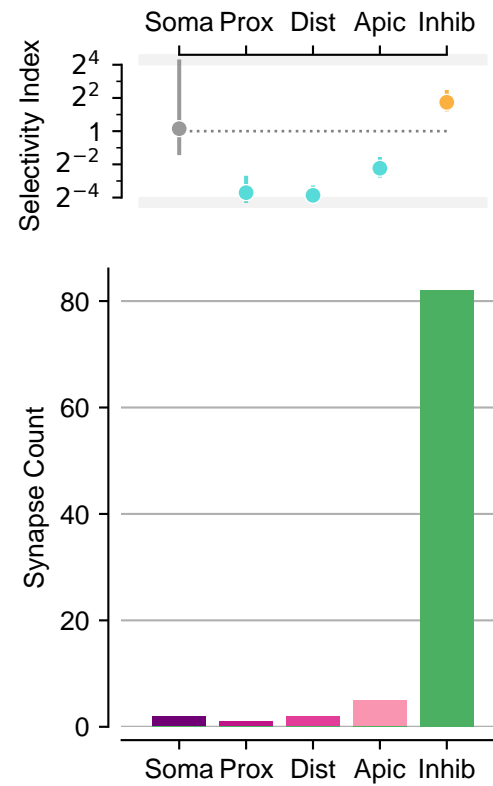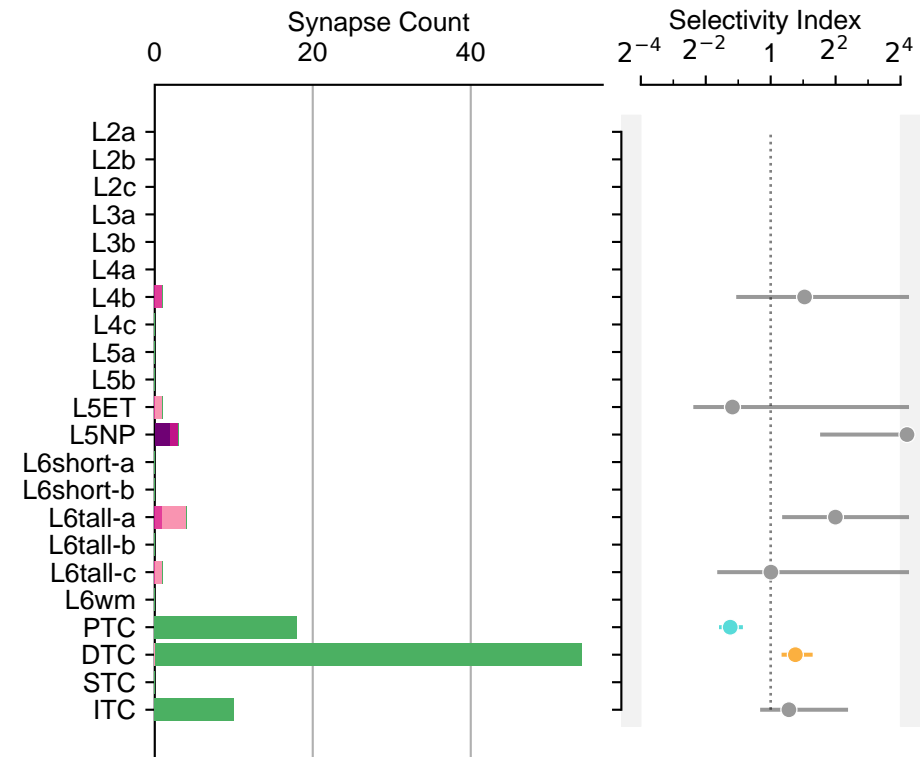

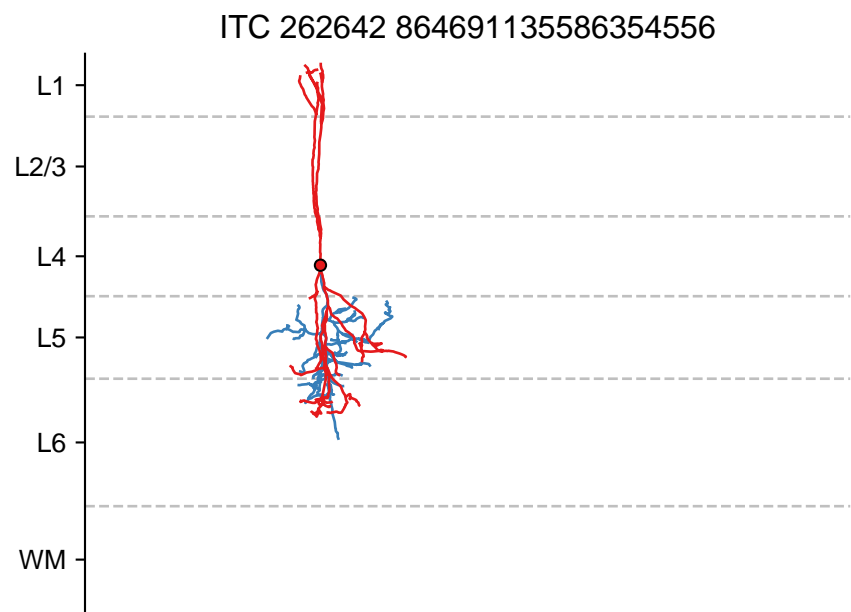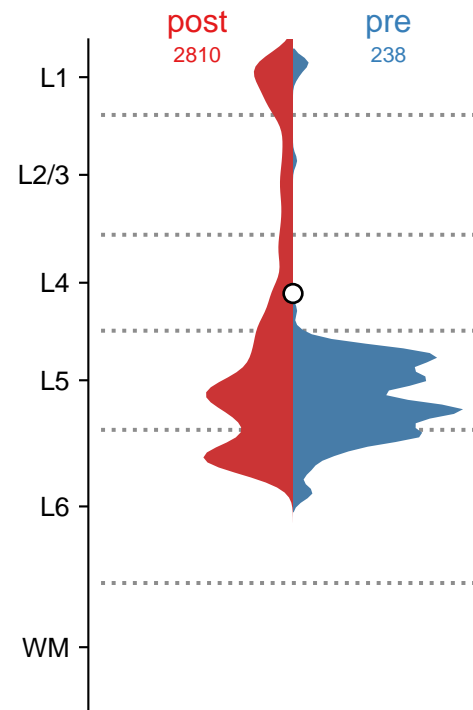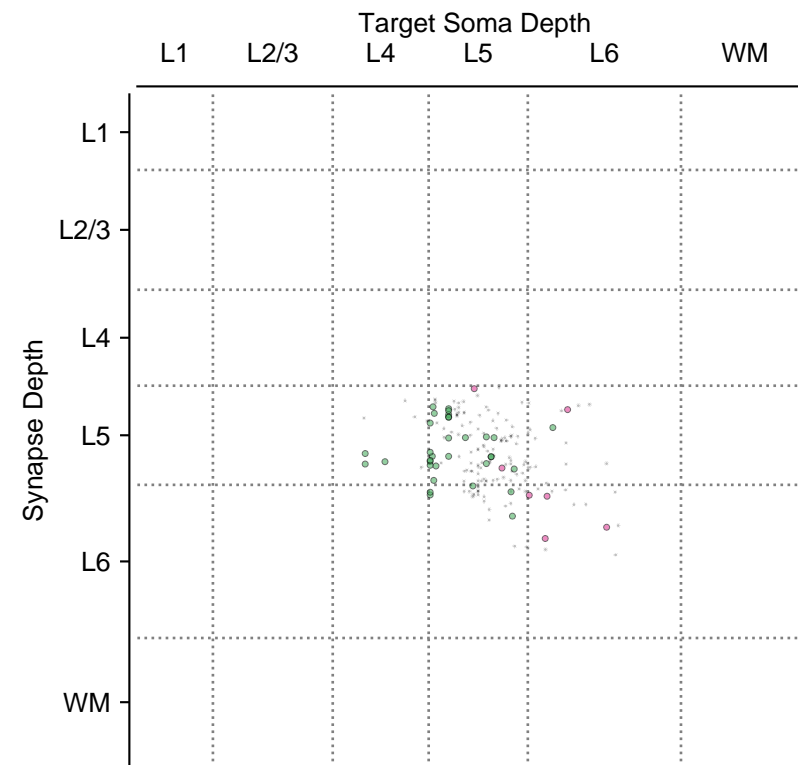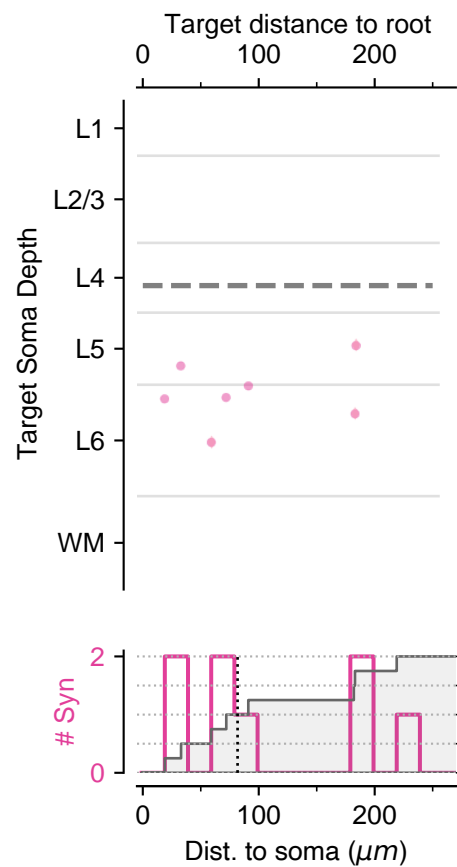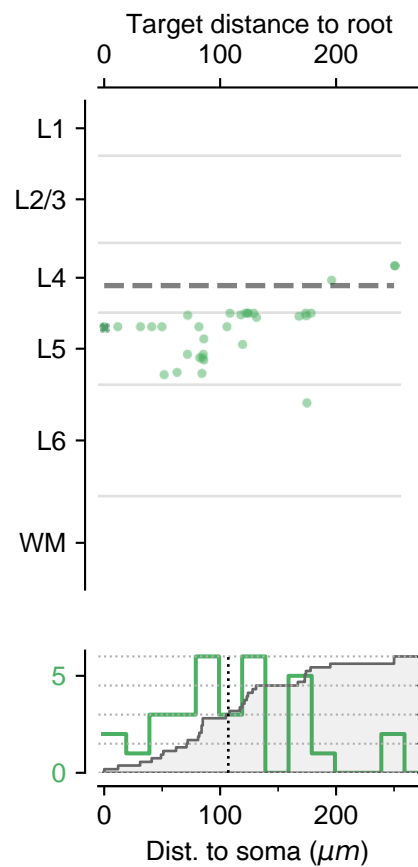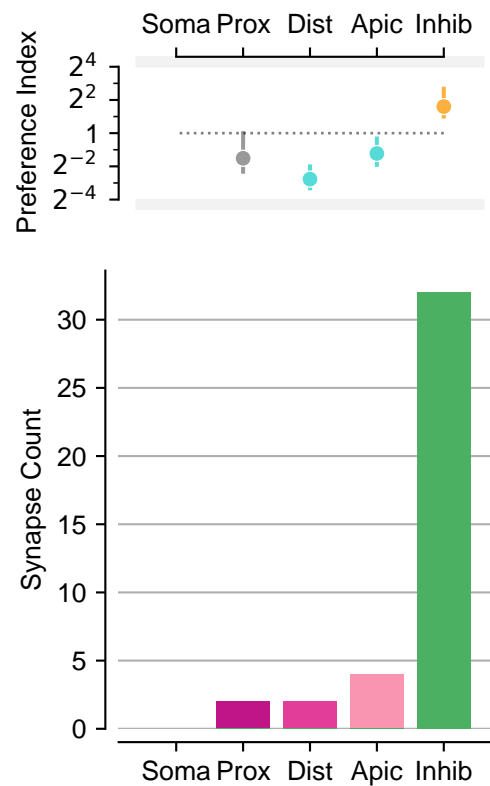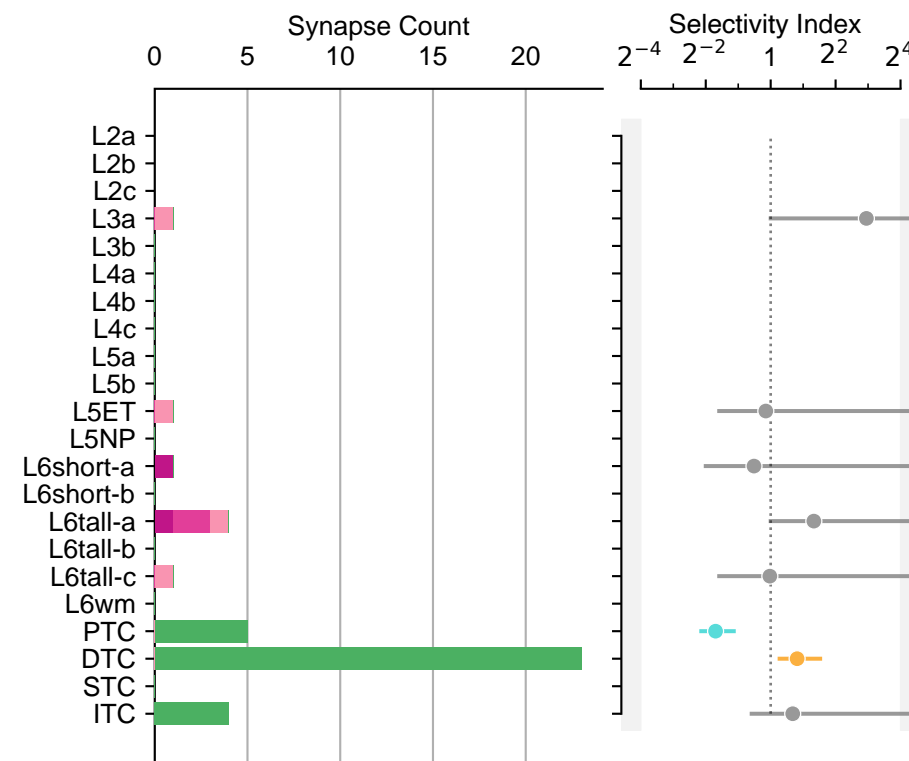

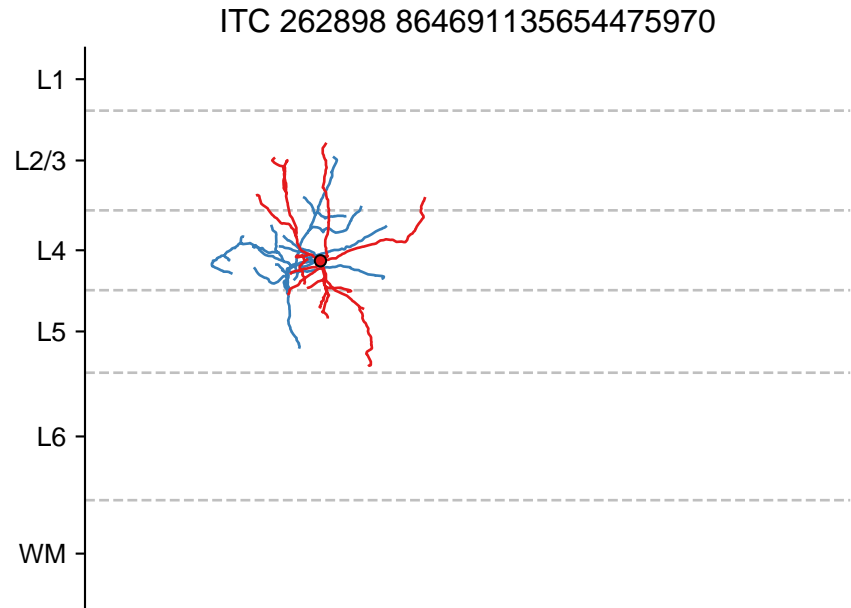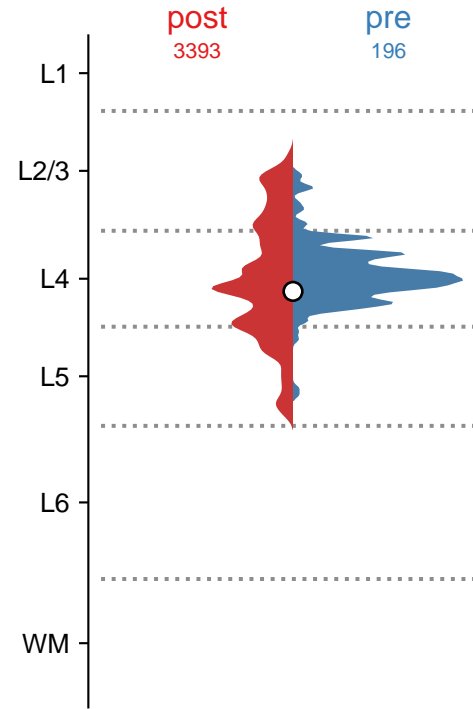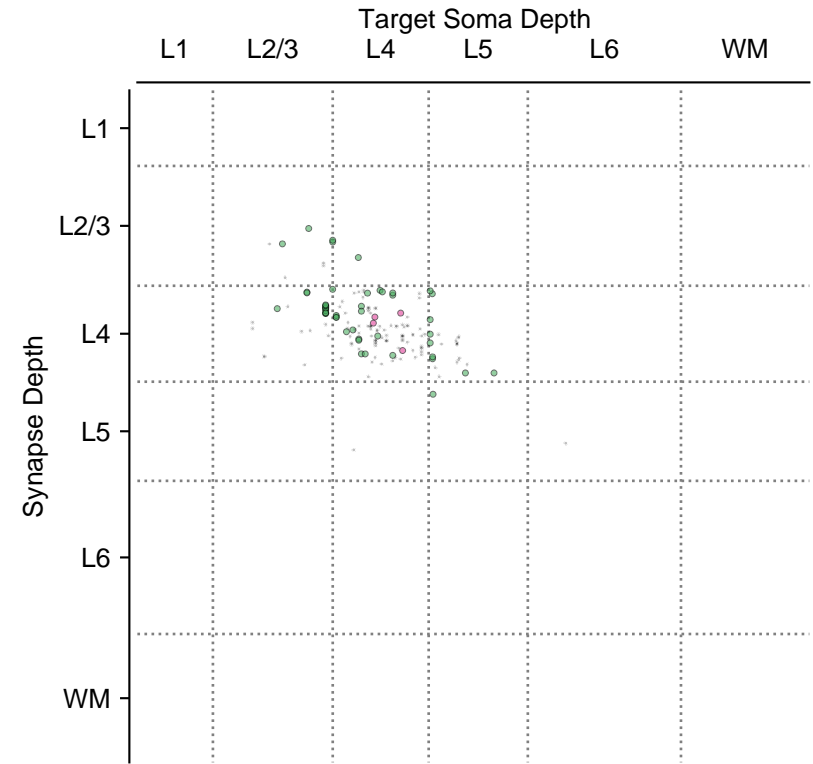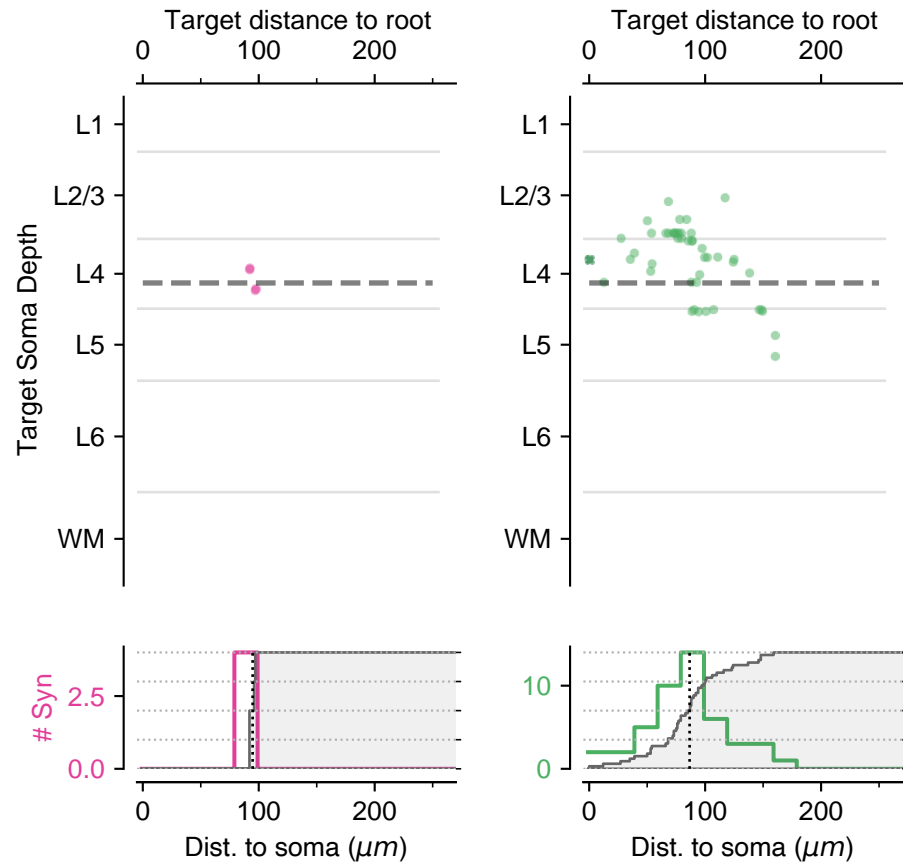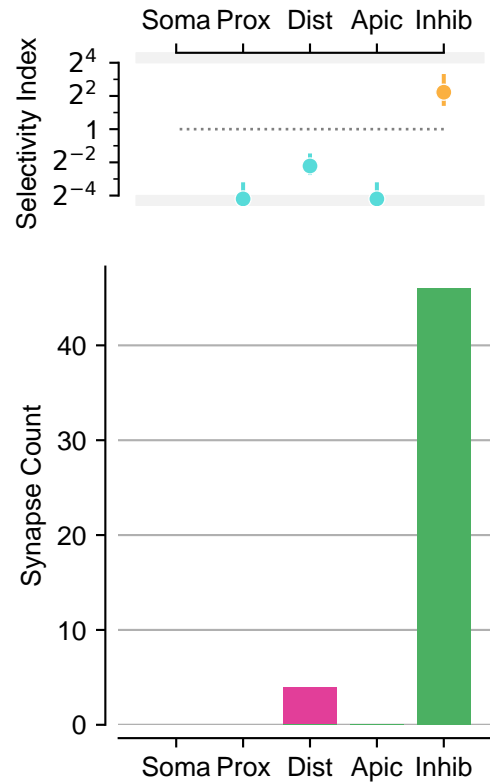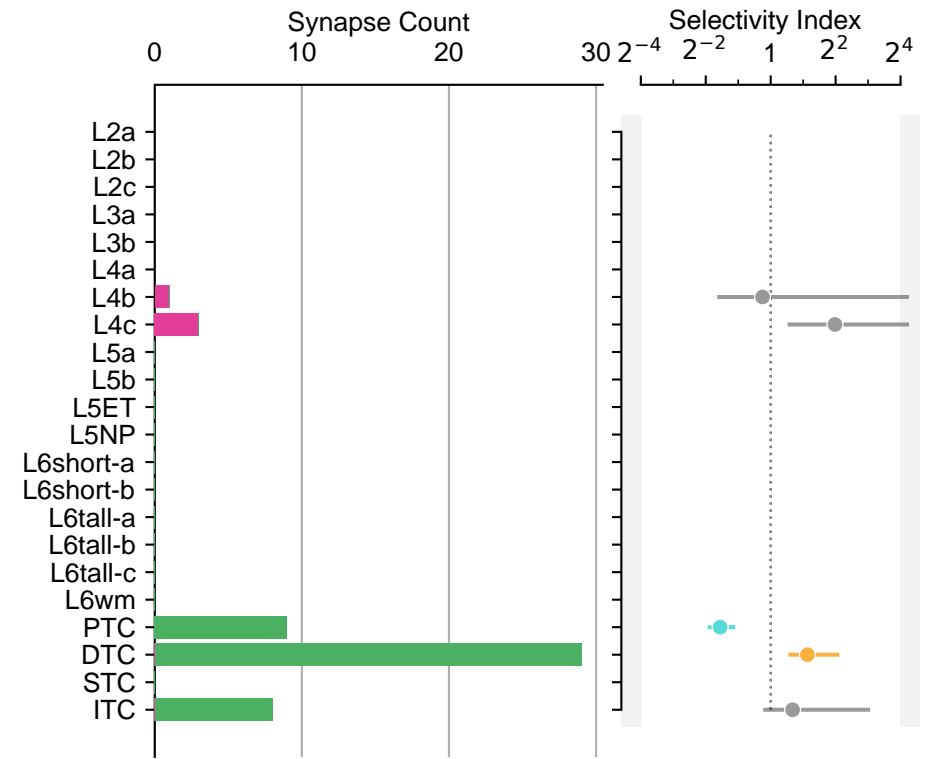

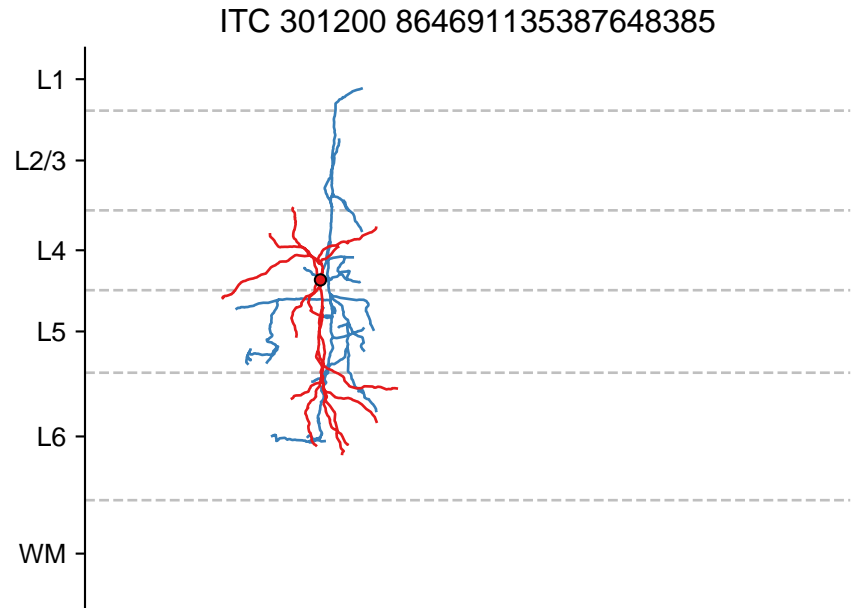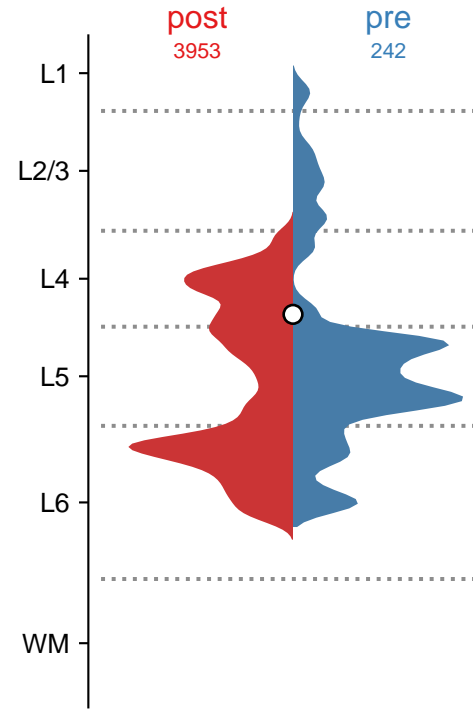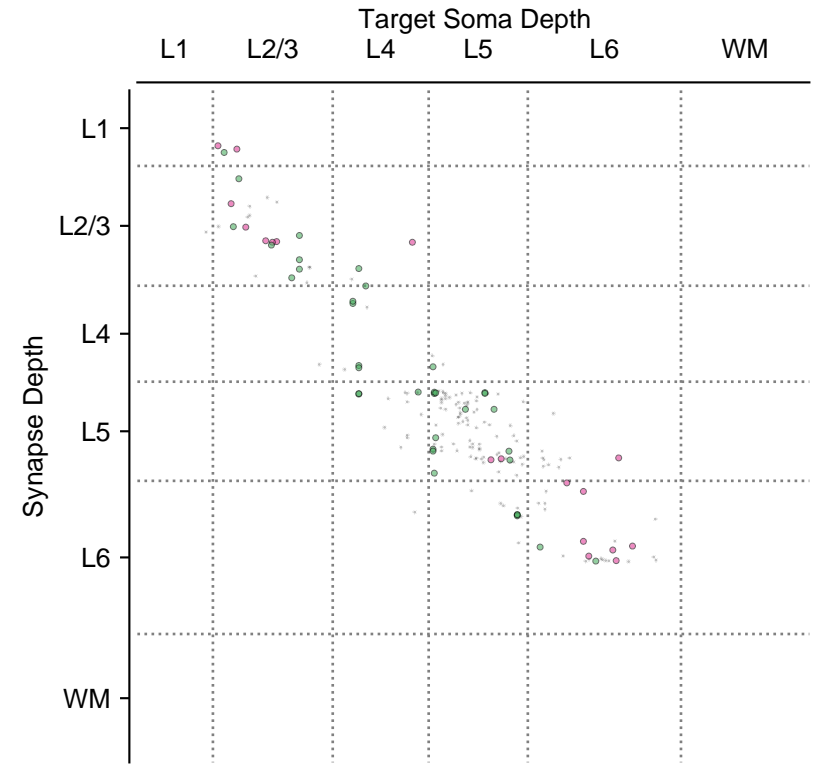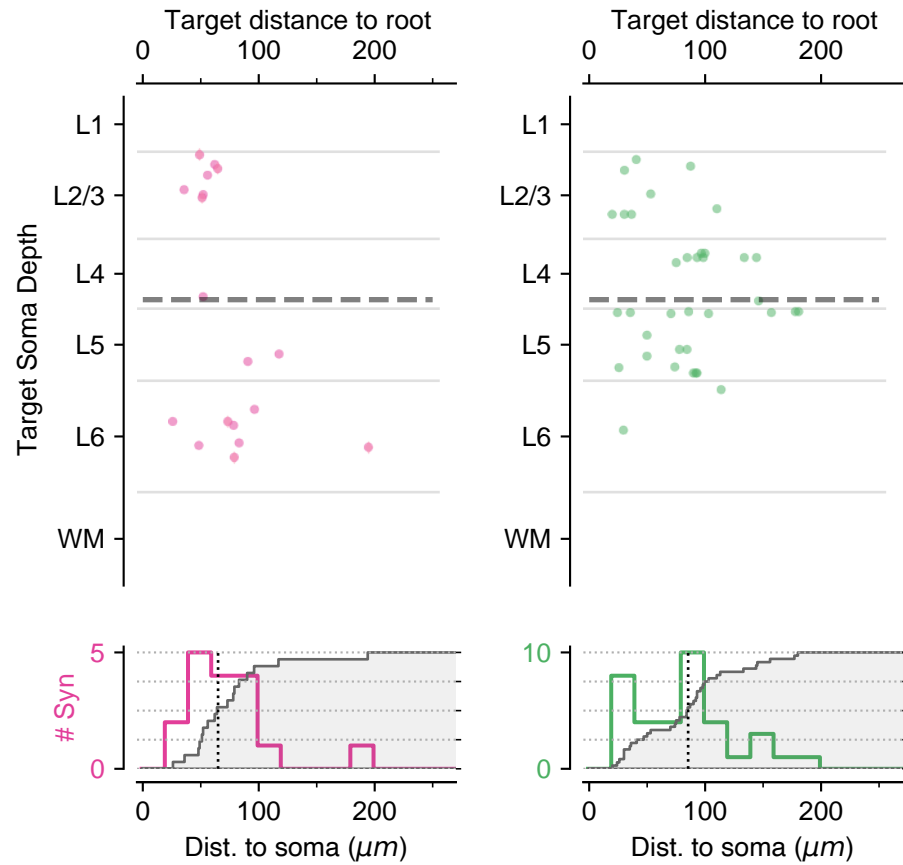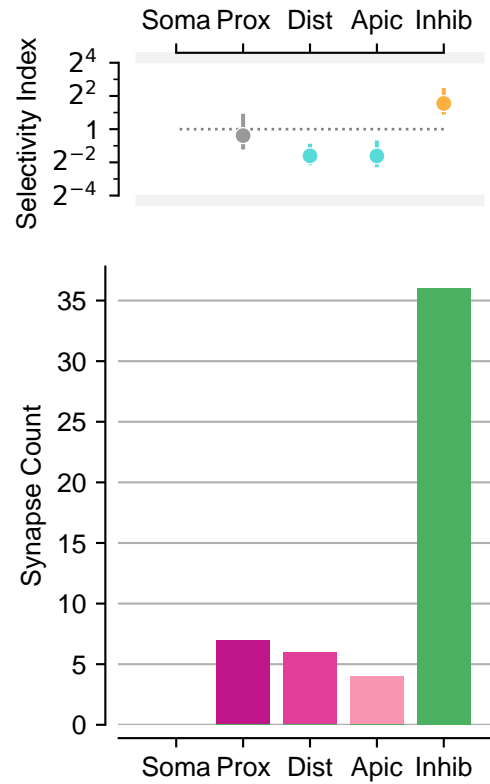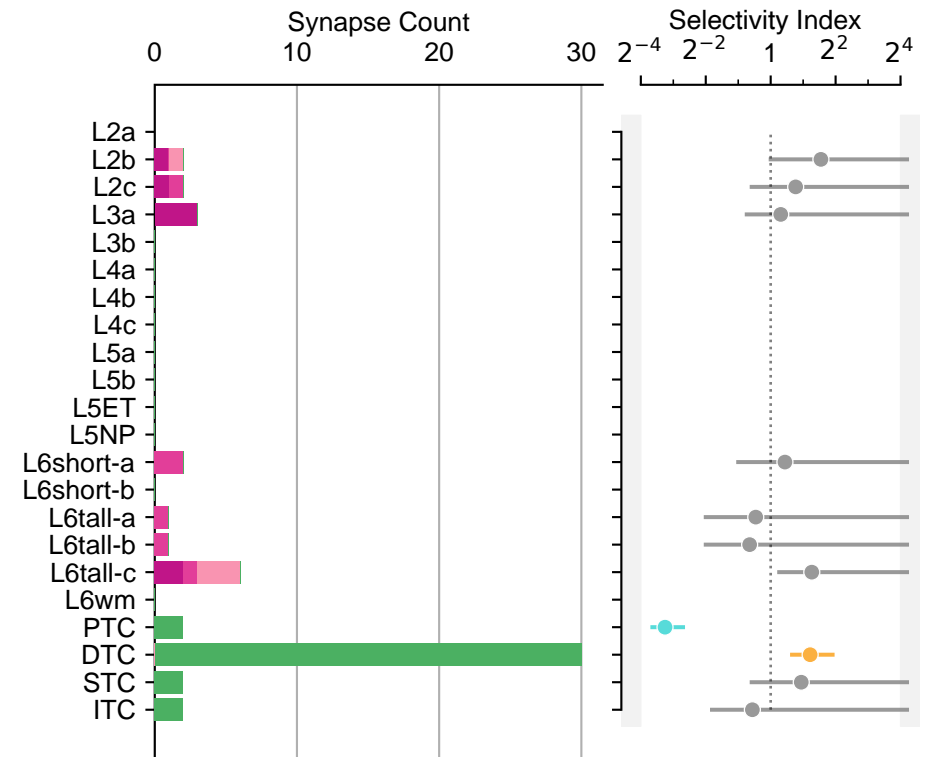

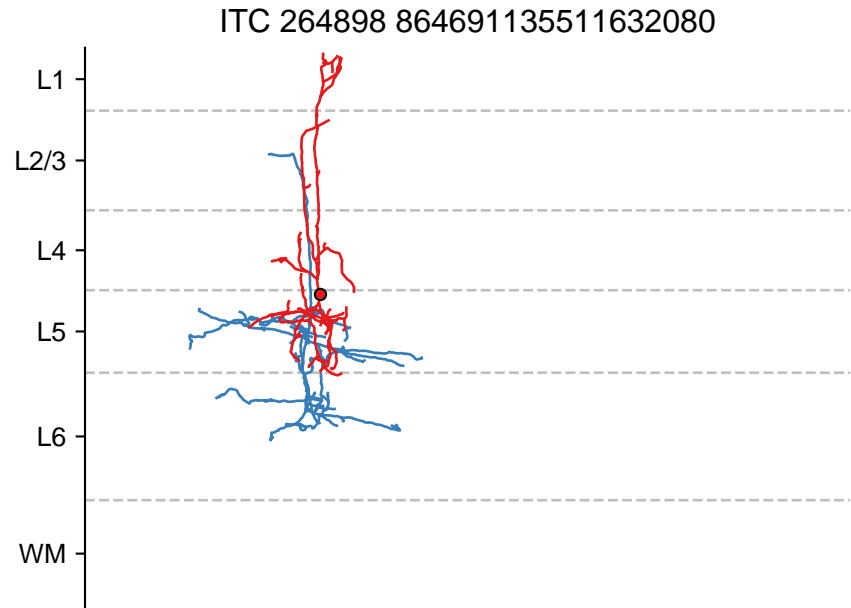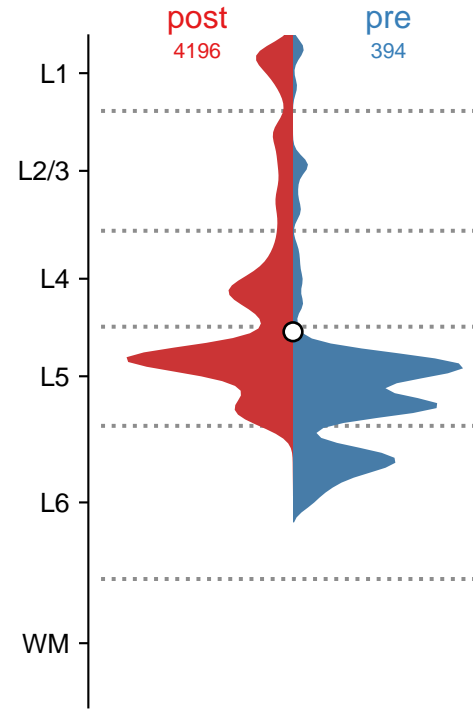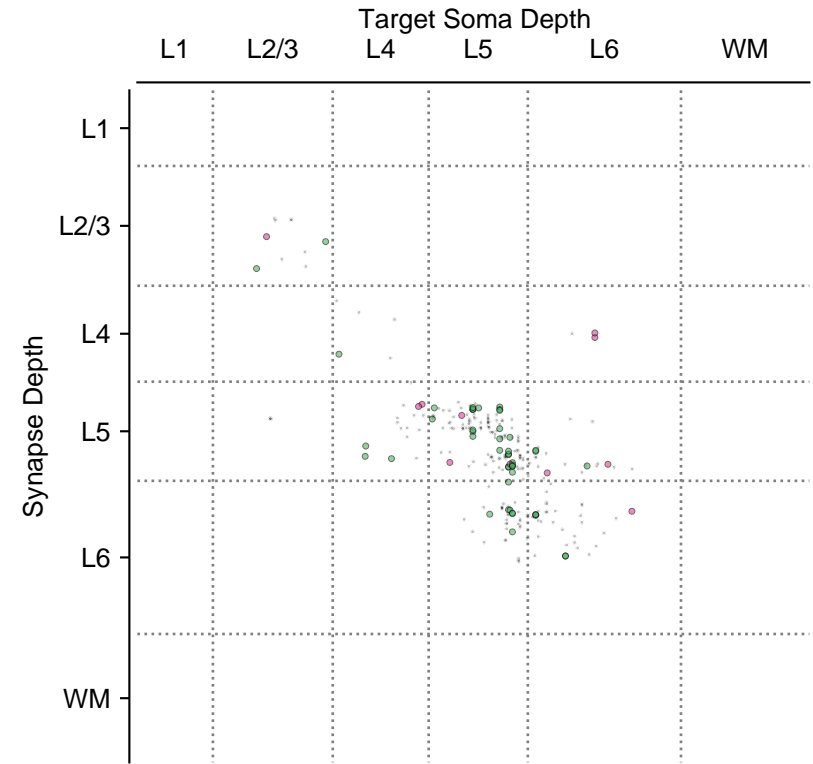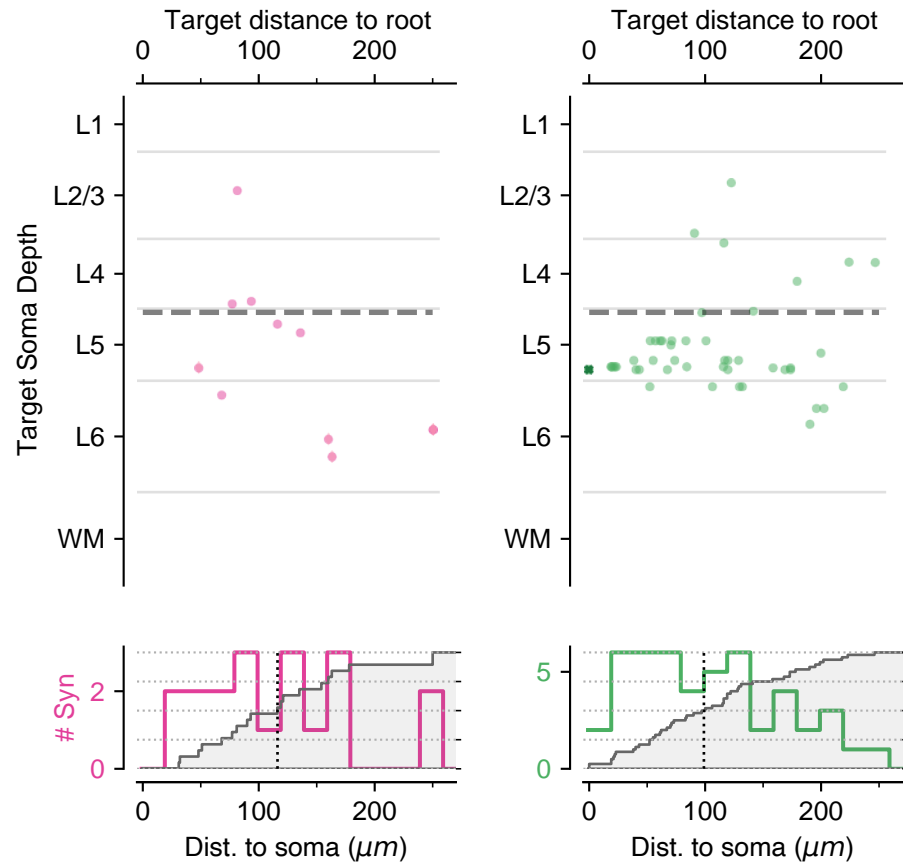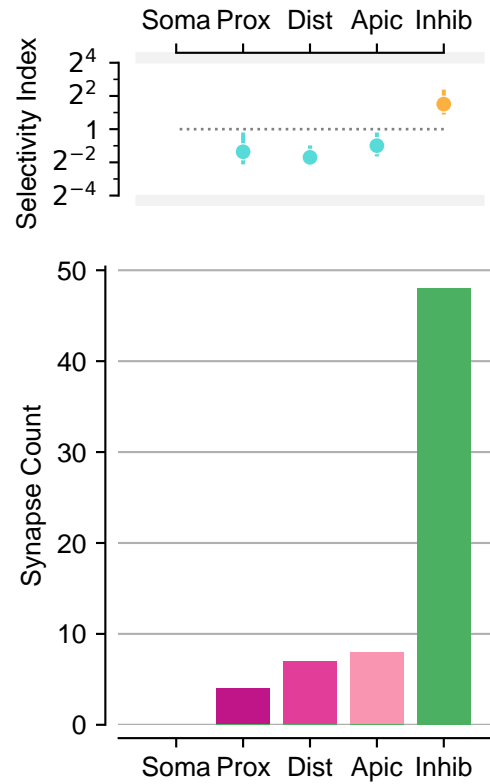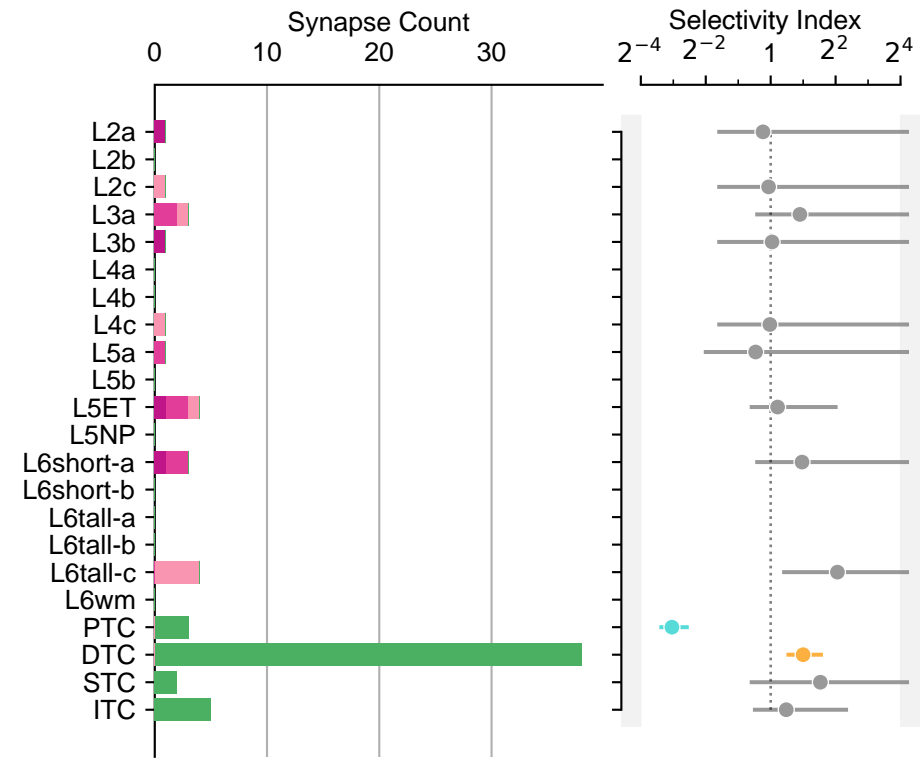

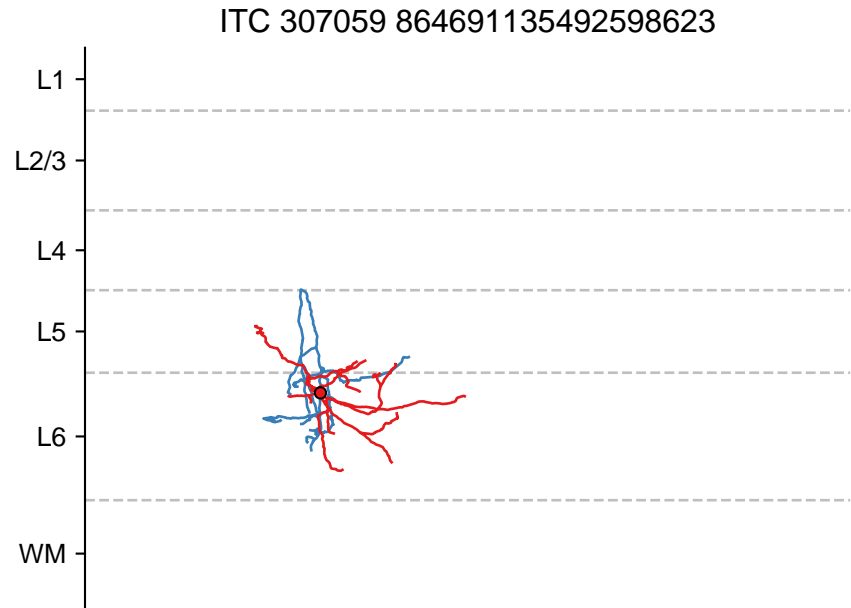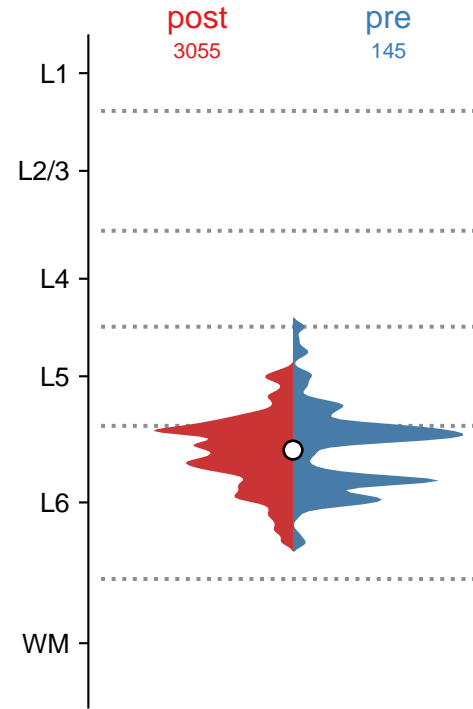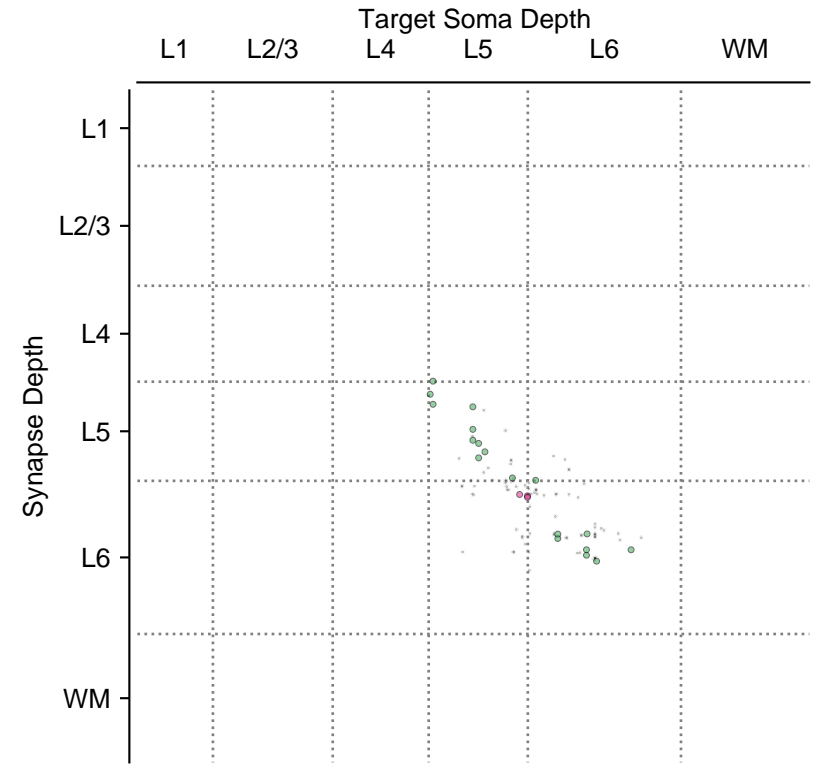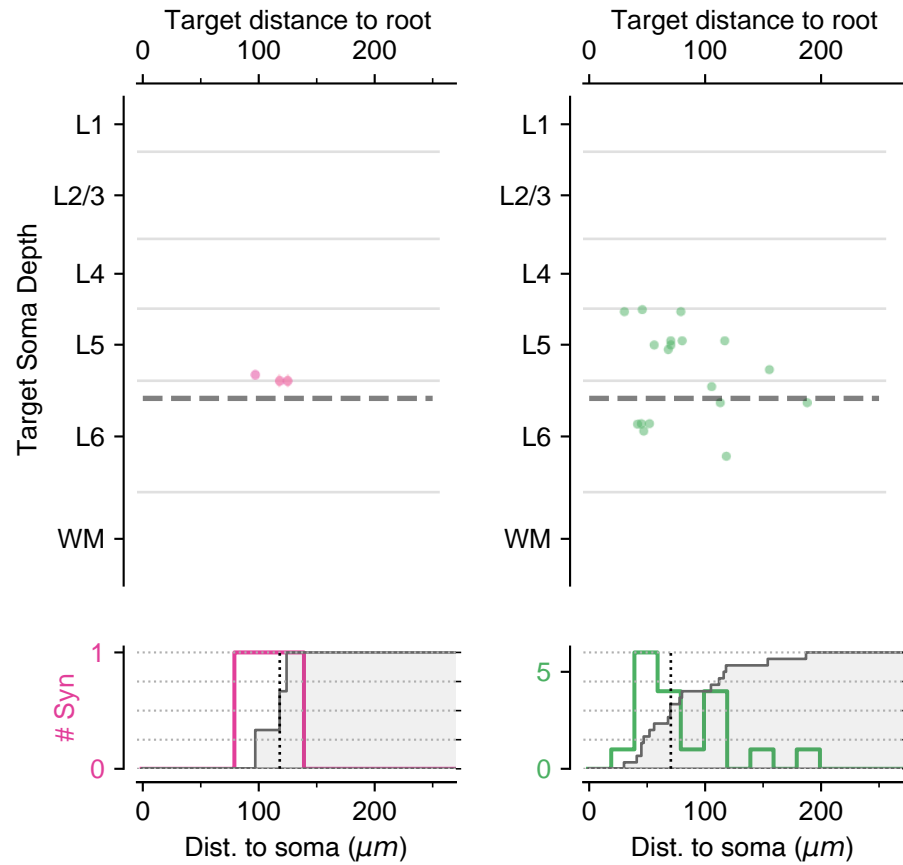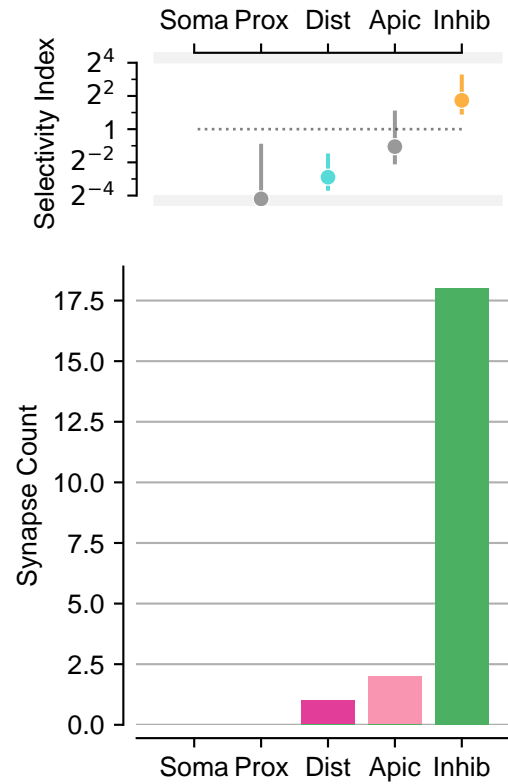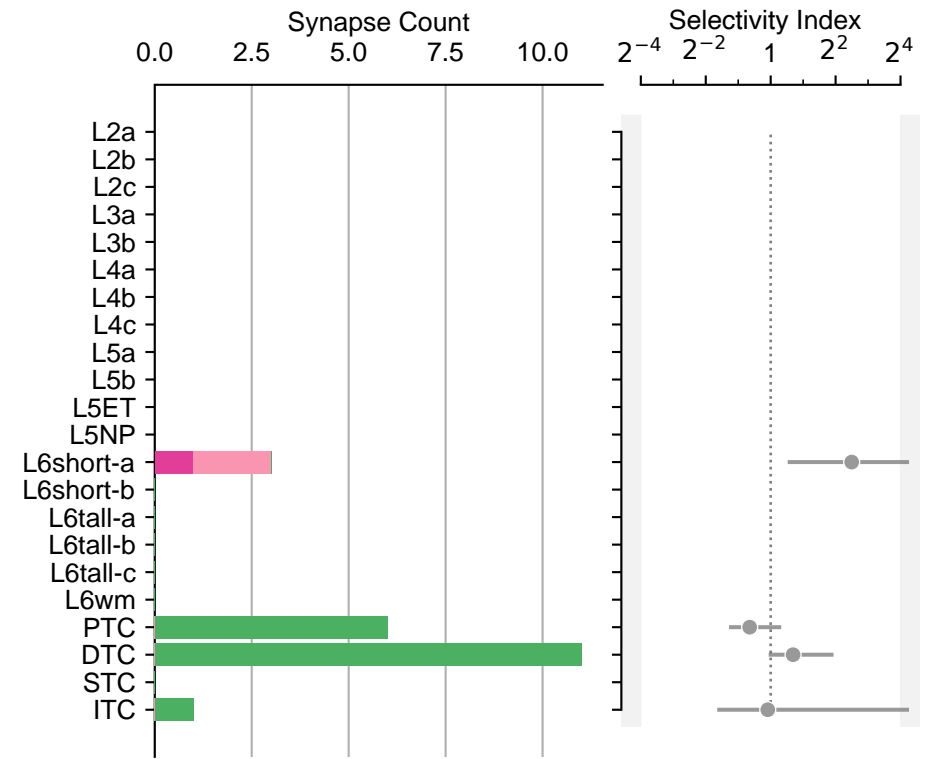

# Motif Group 20

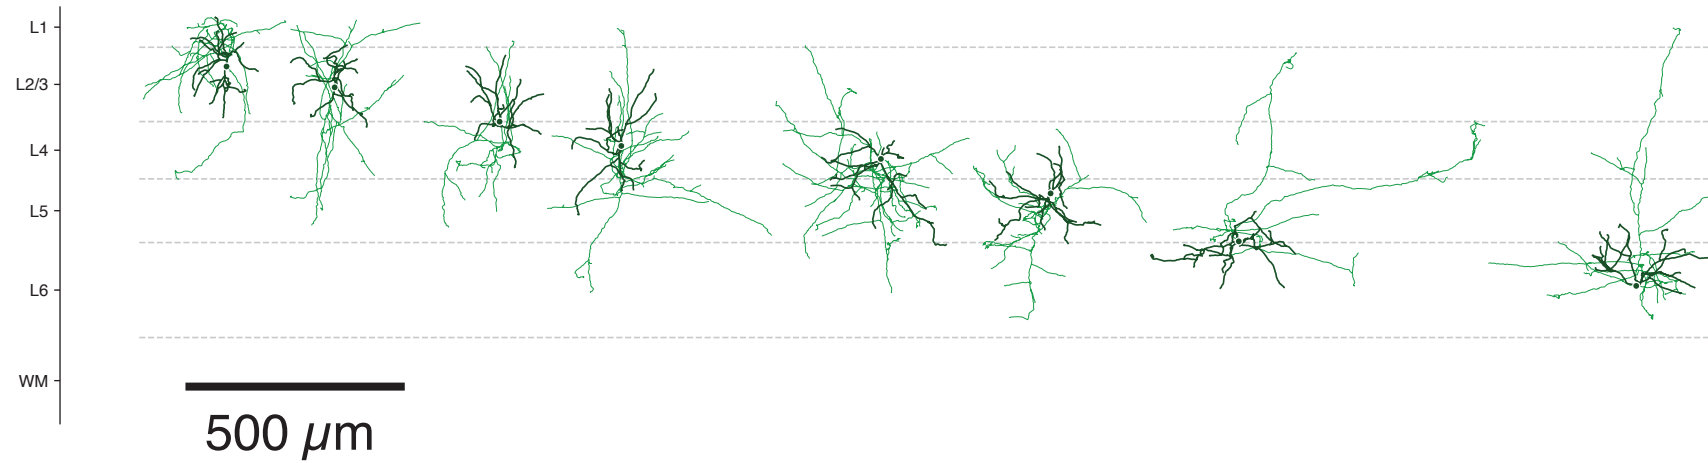

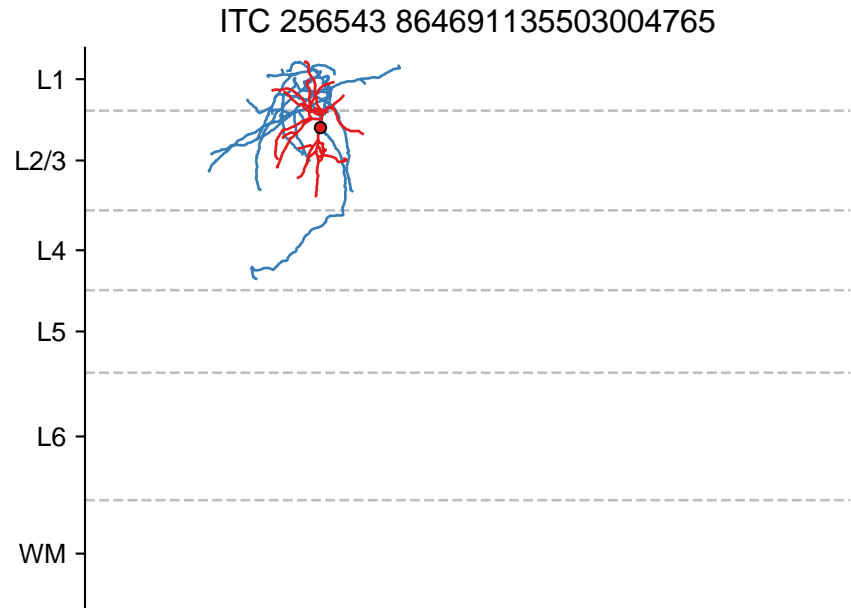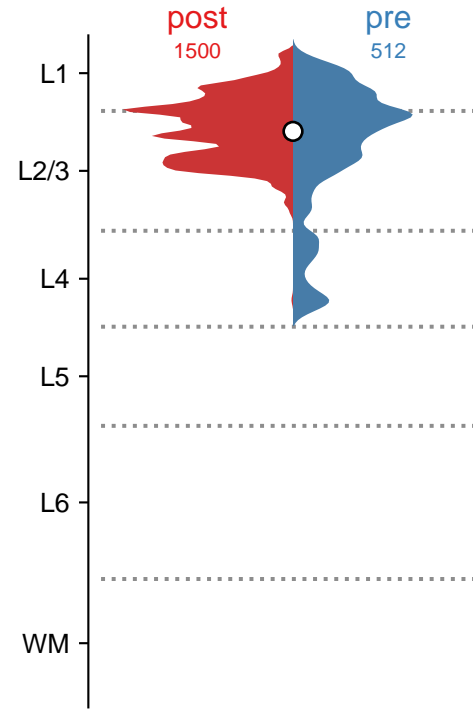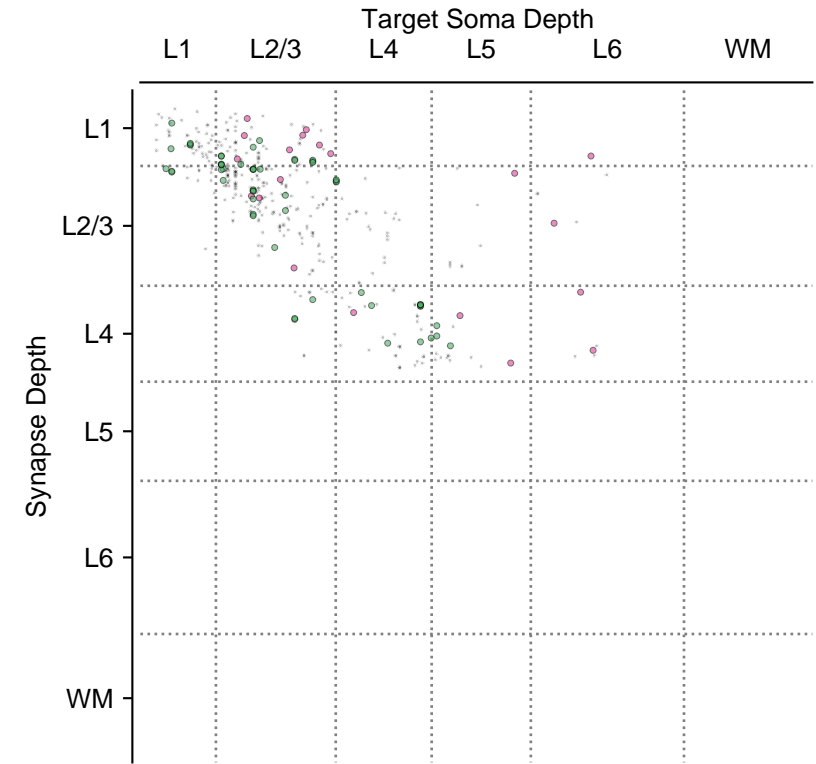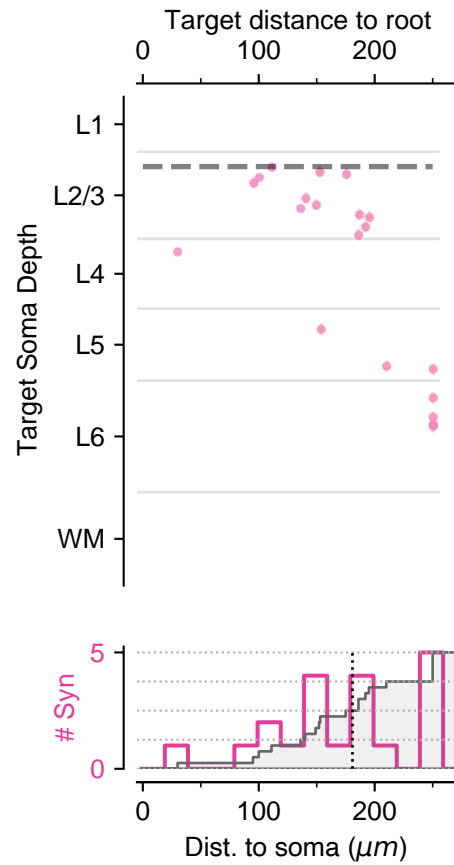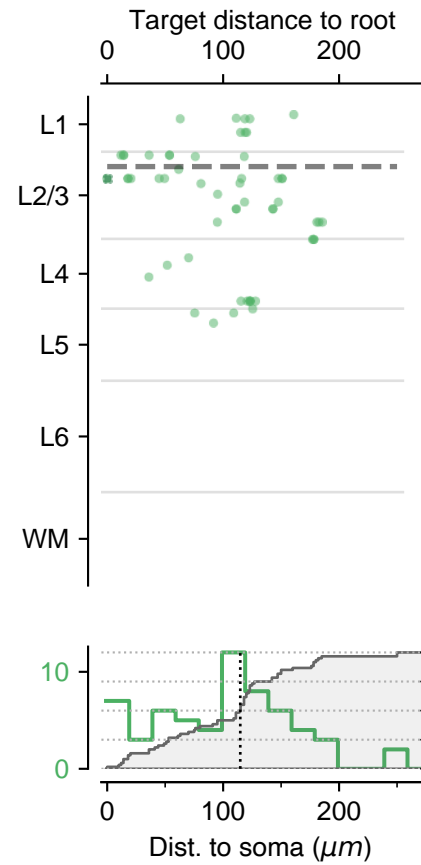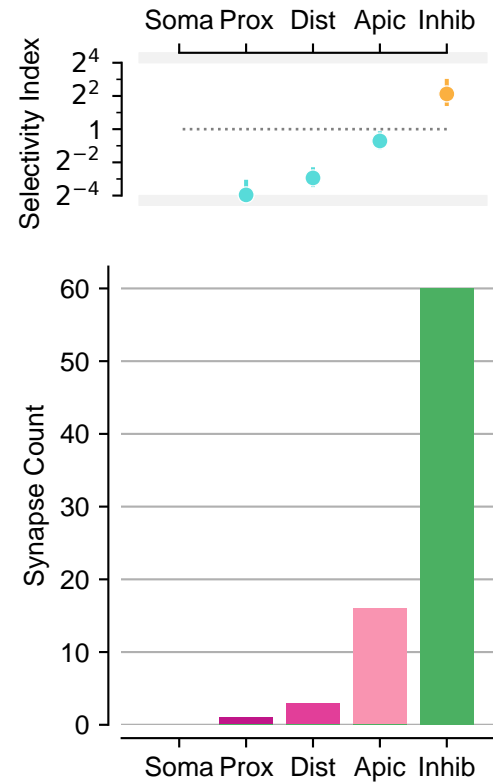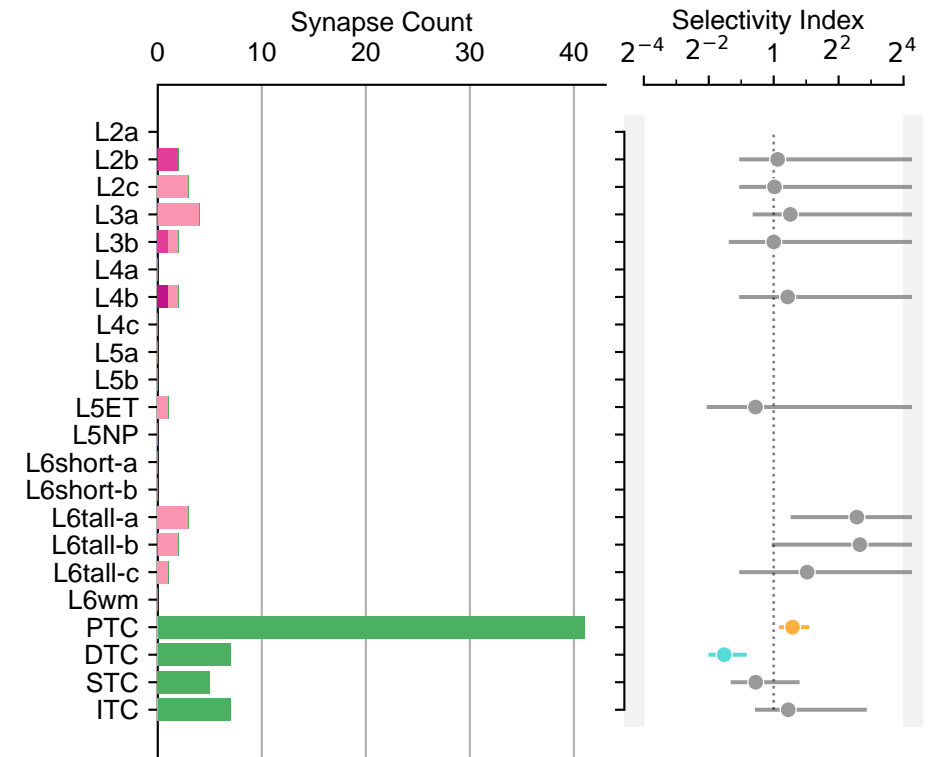



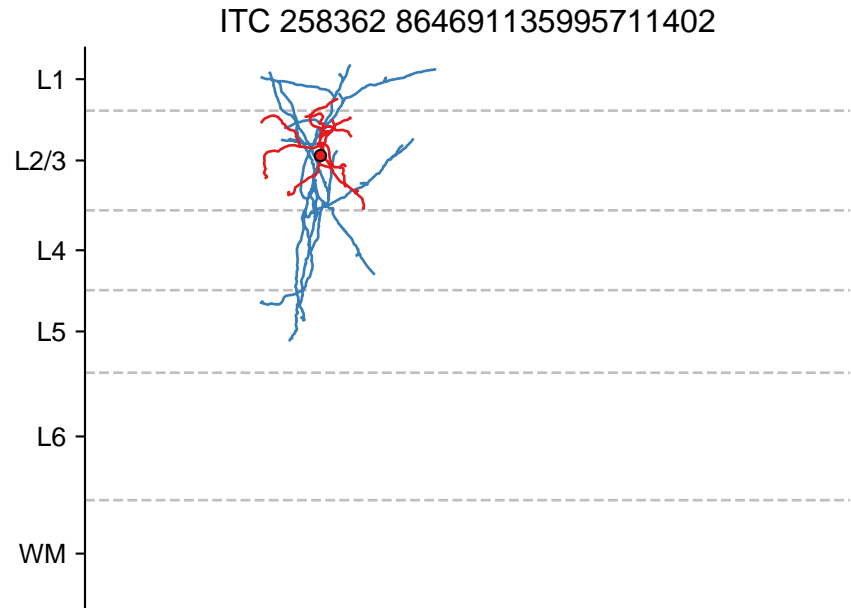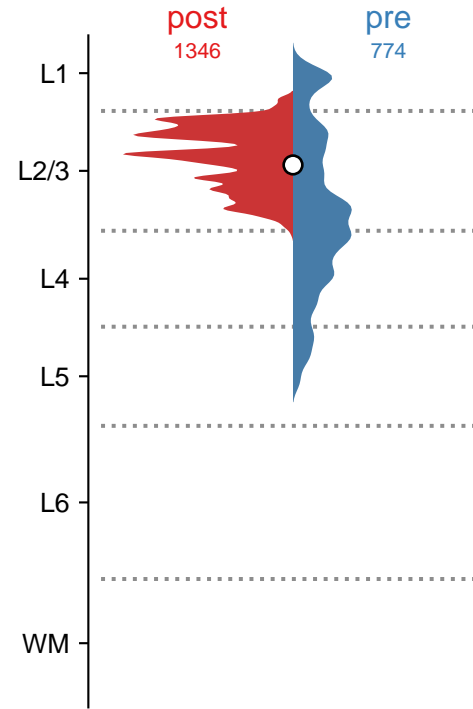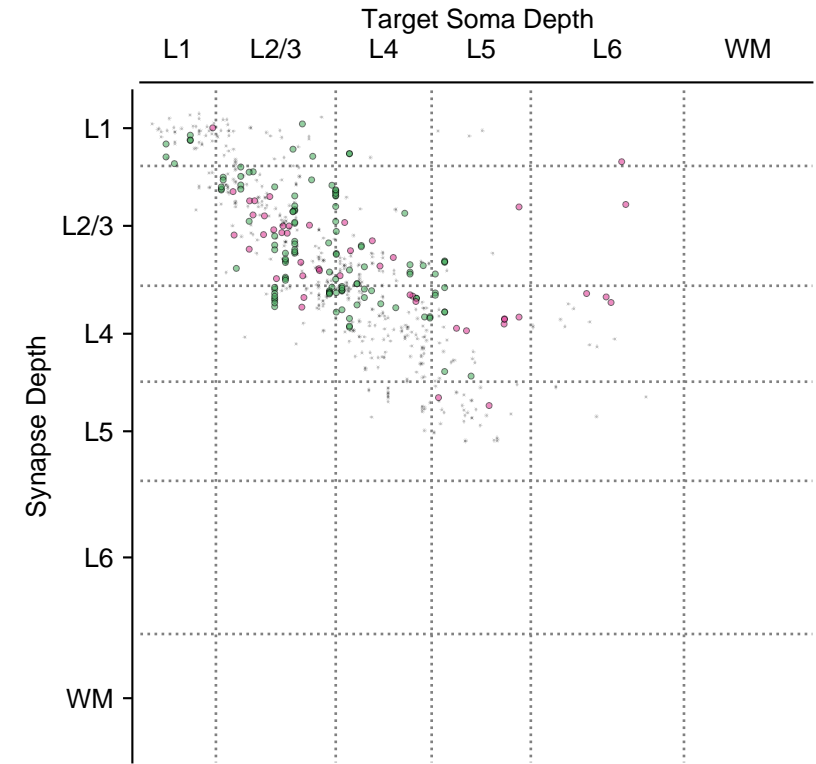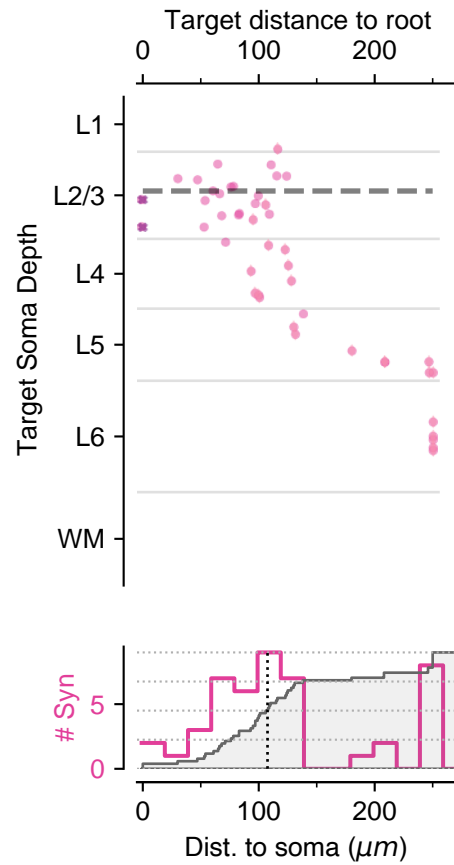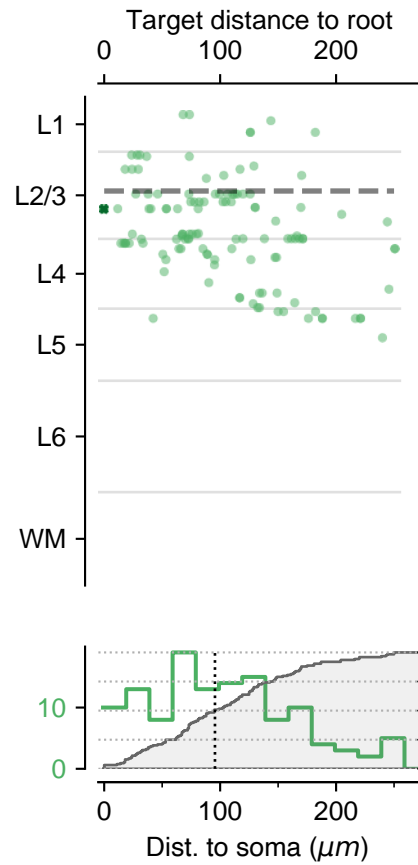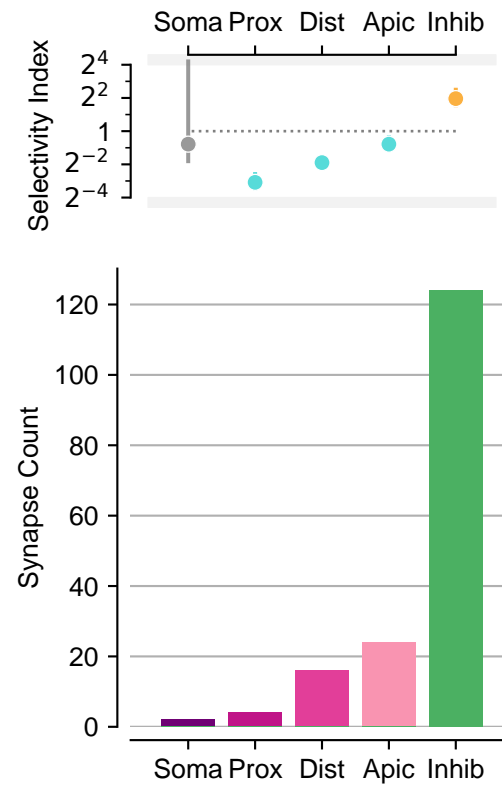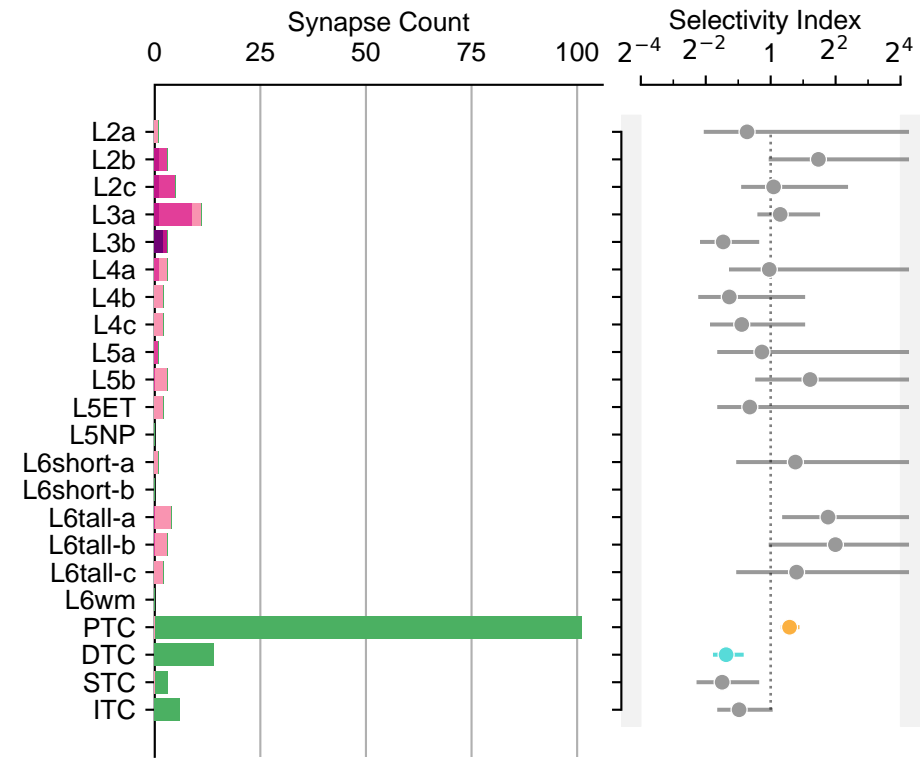

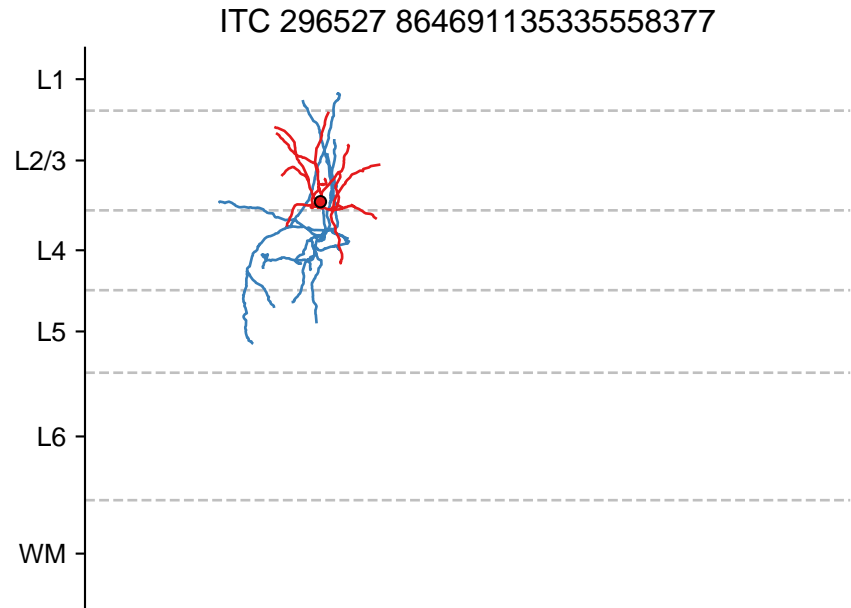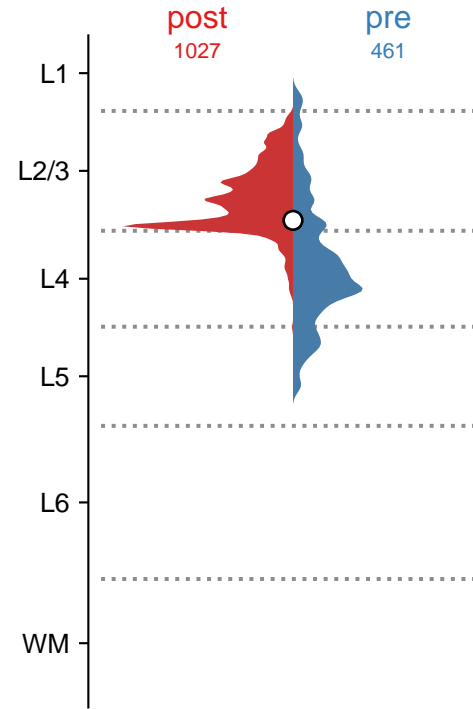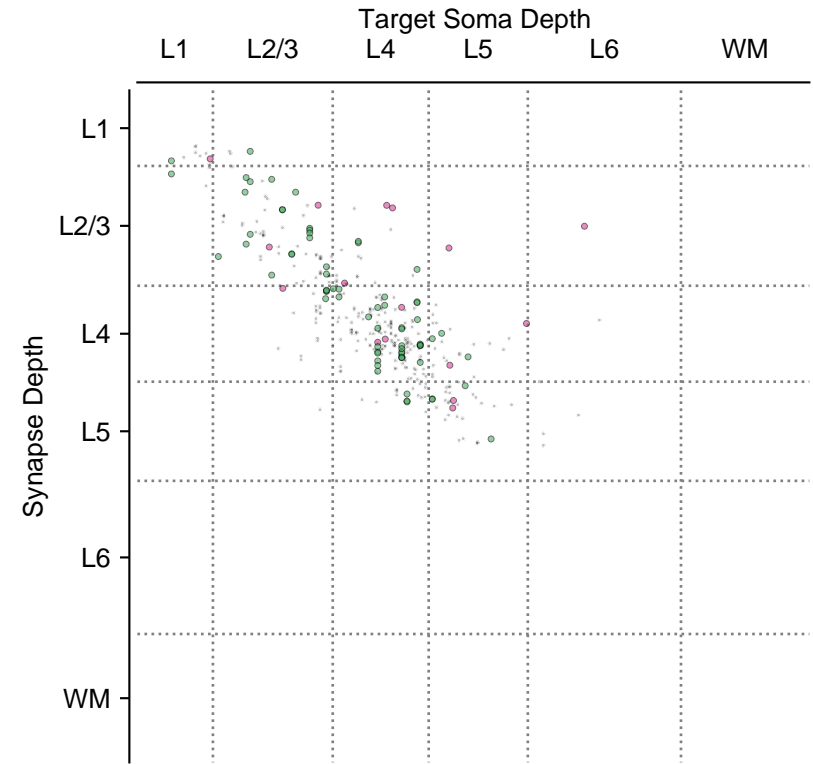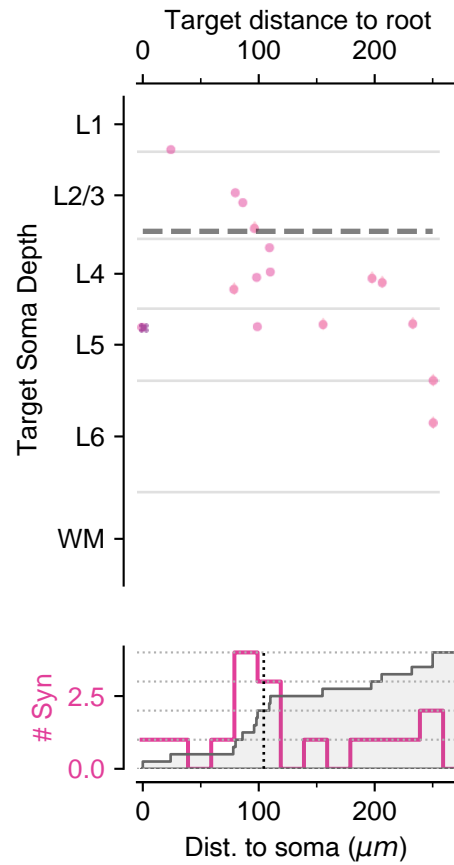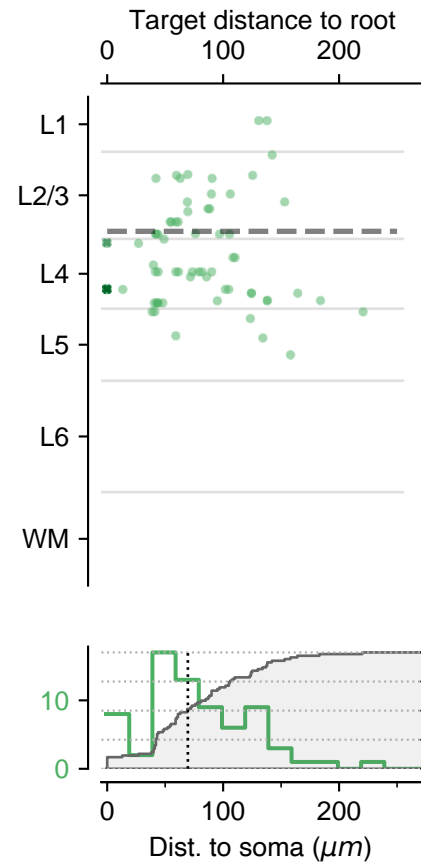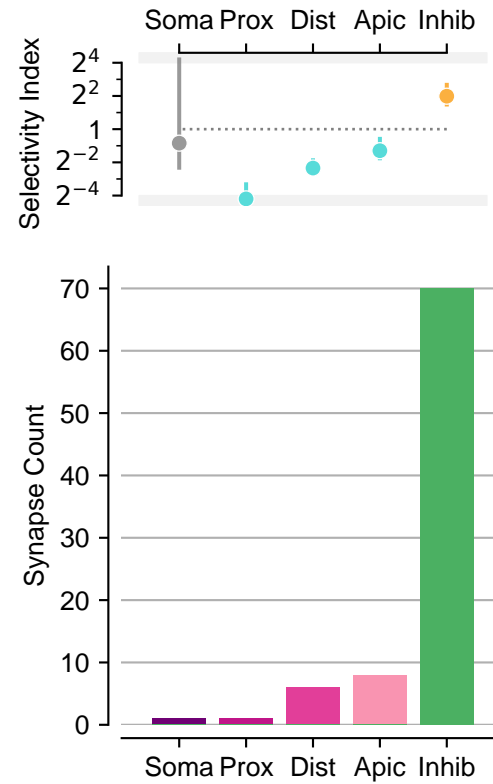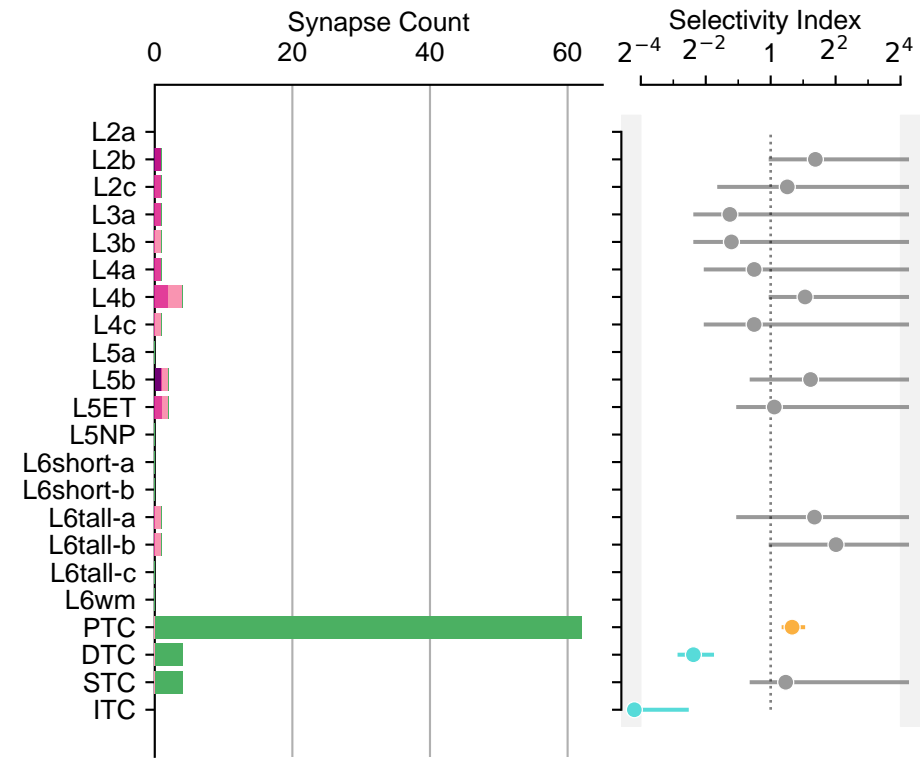

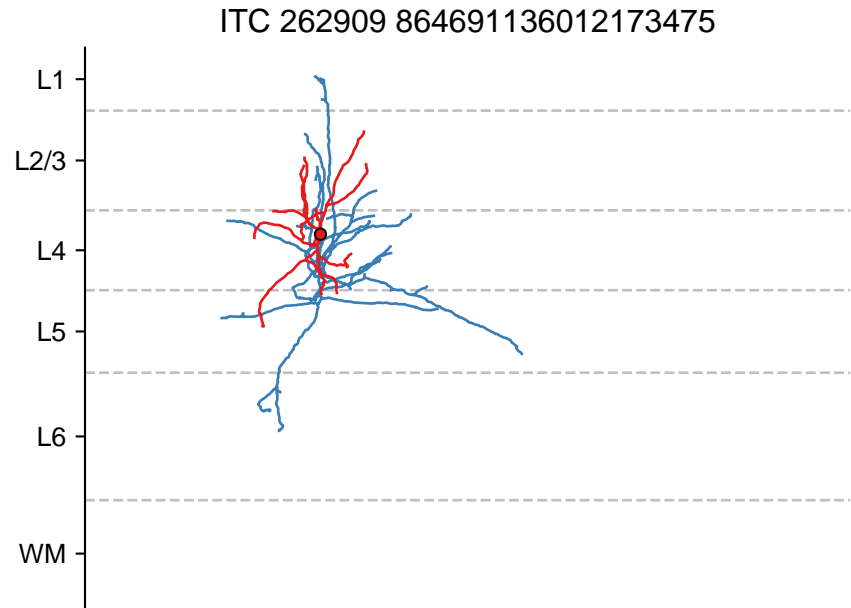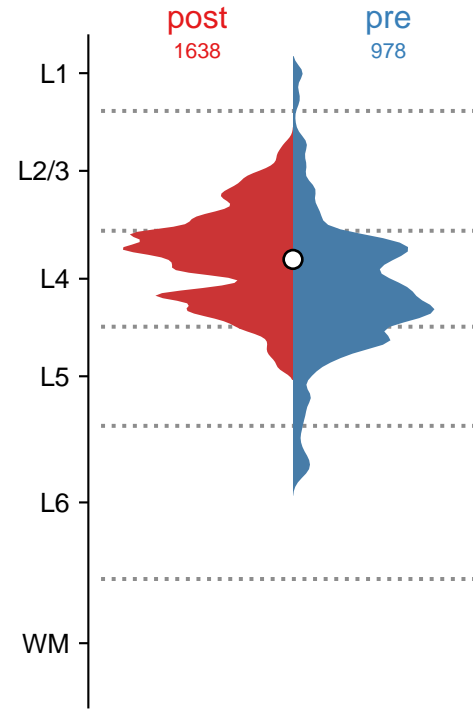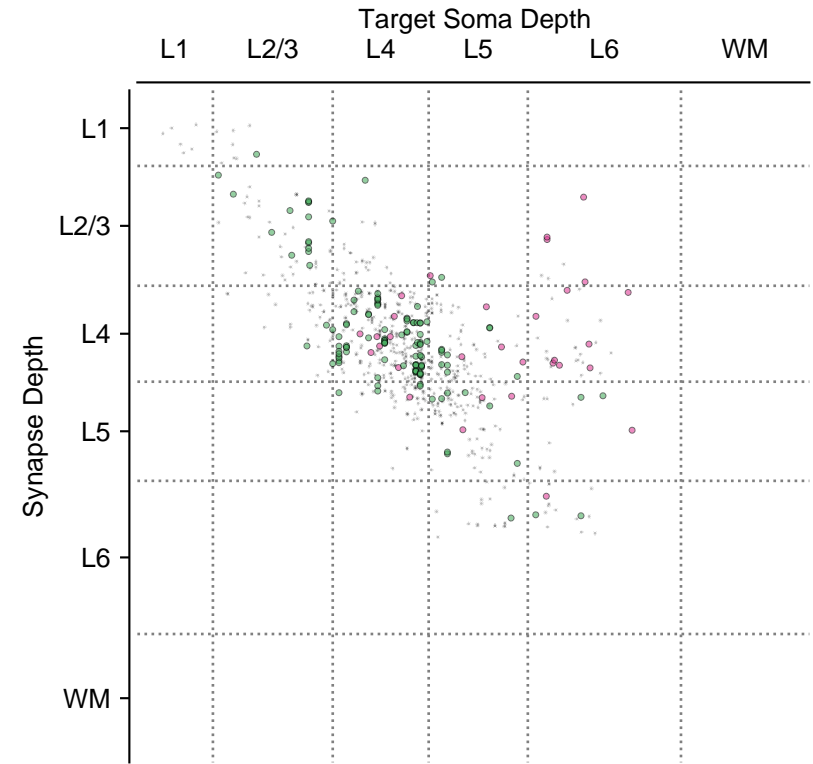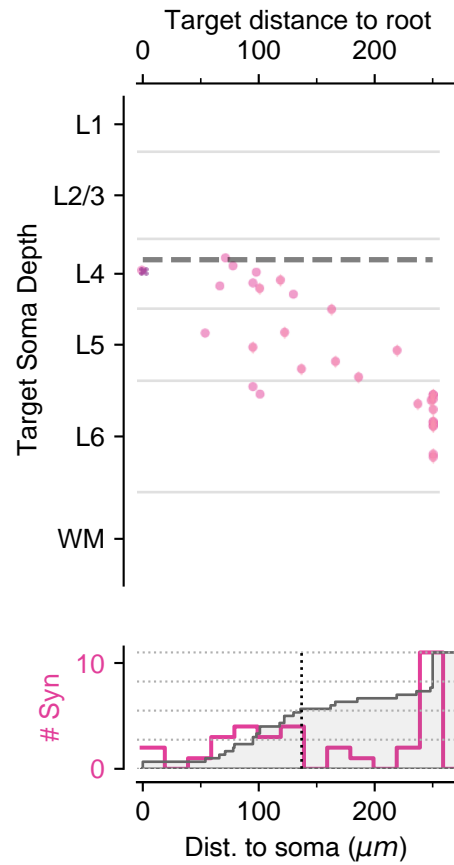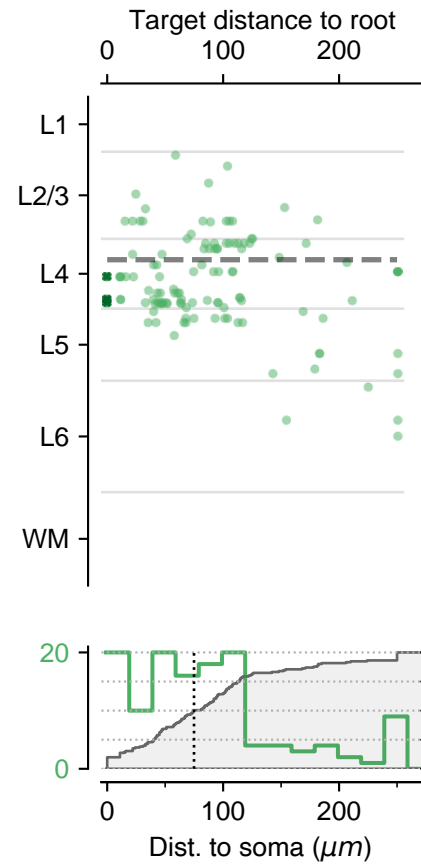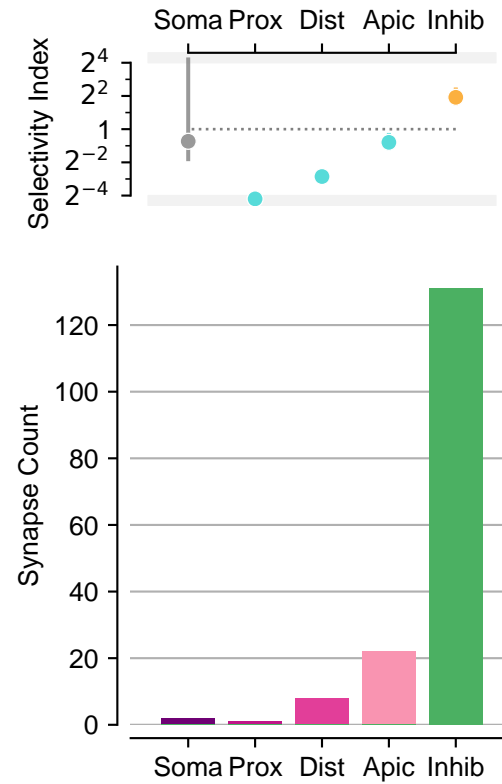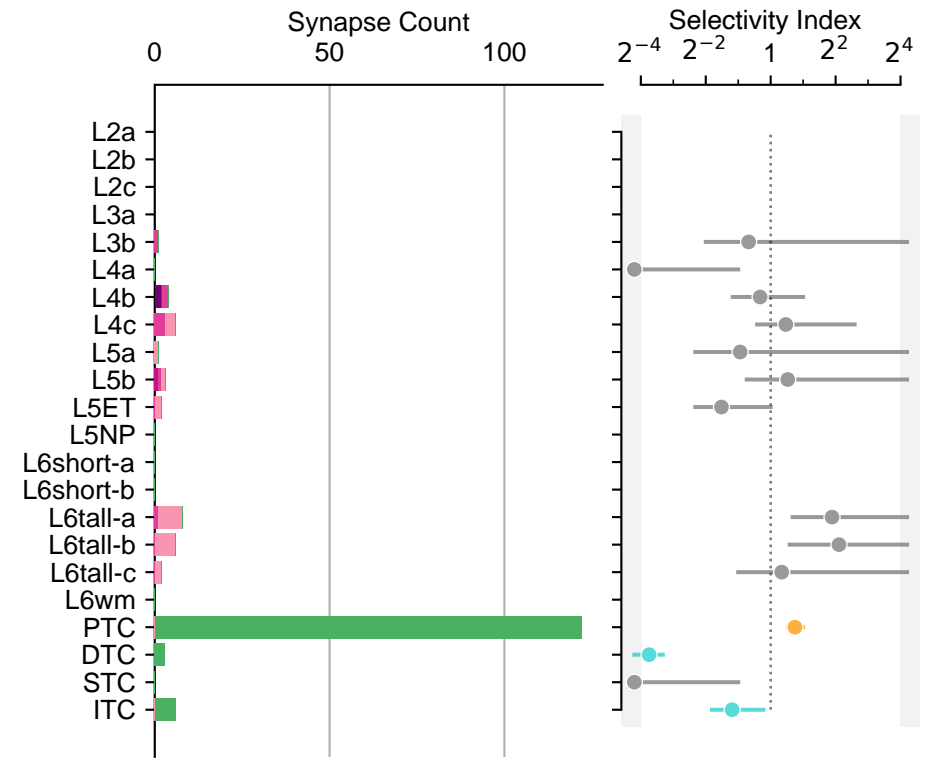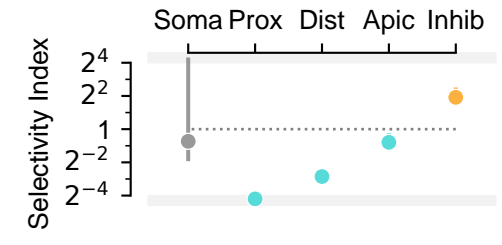

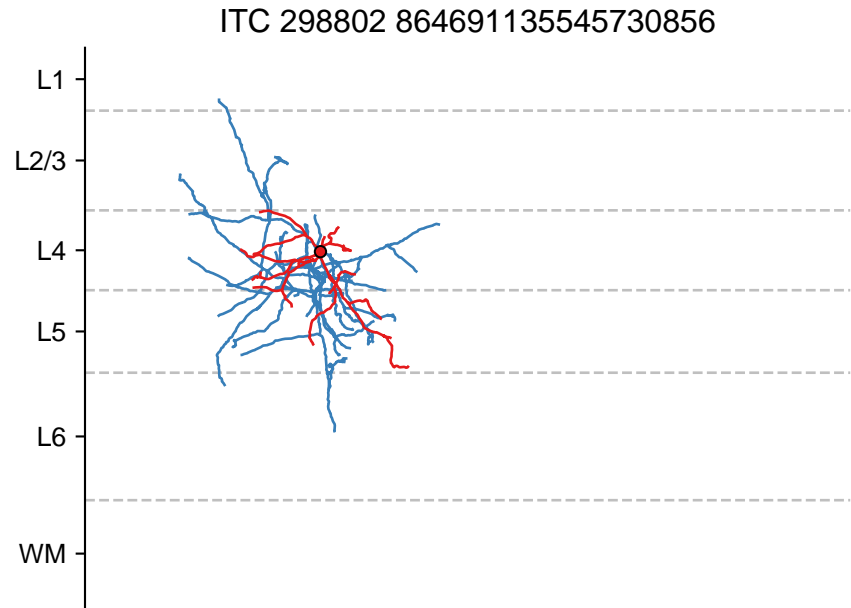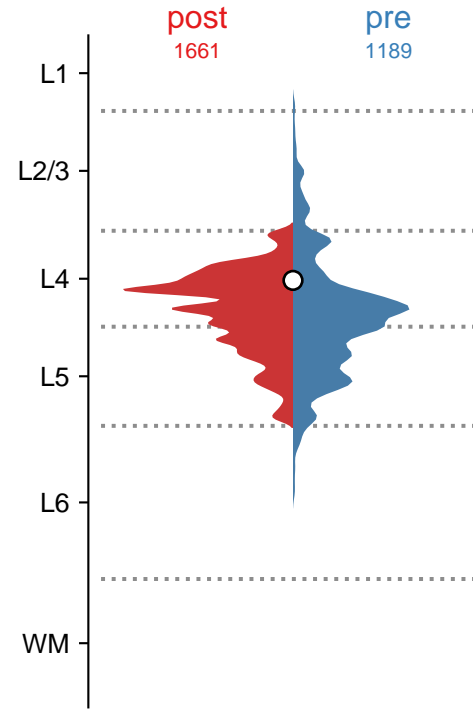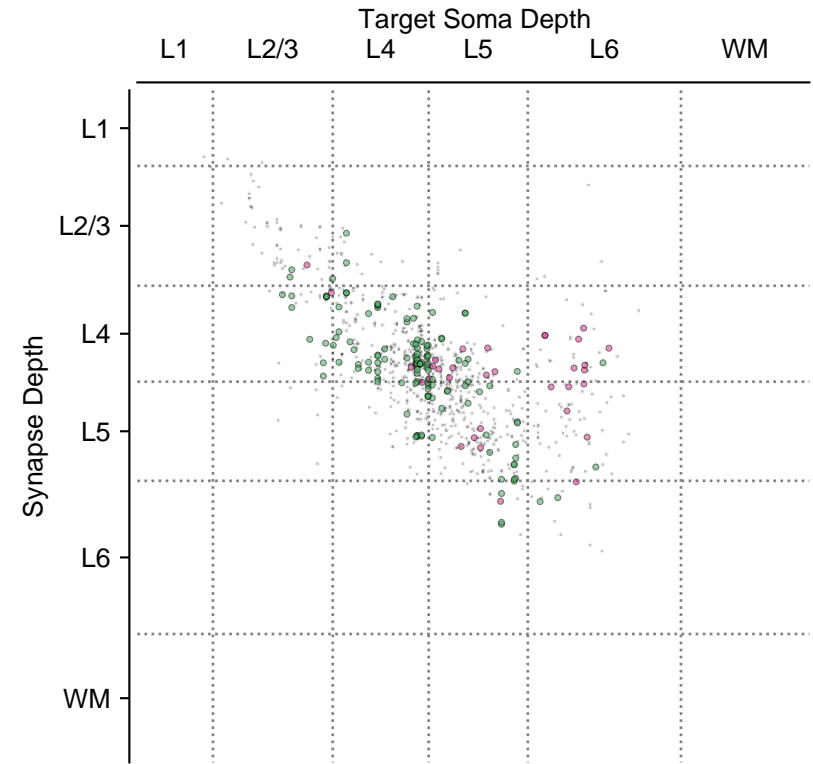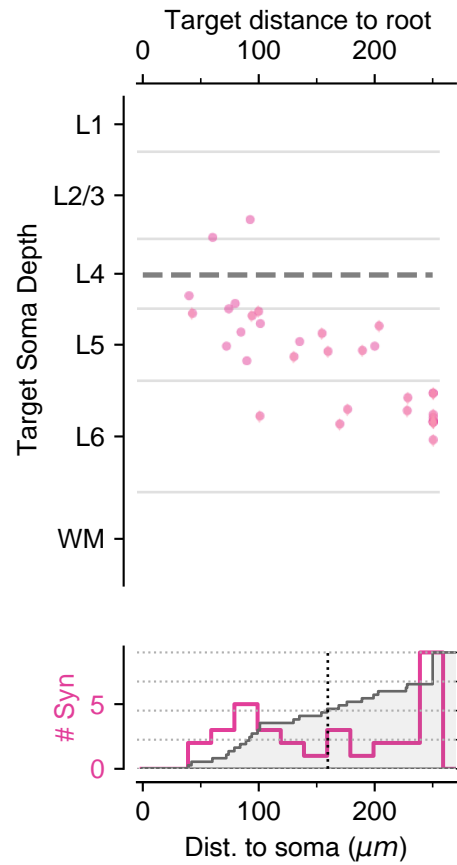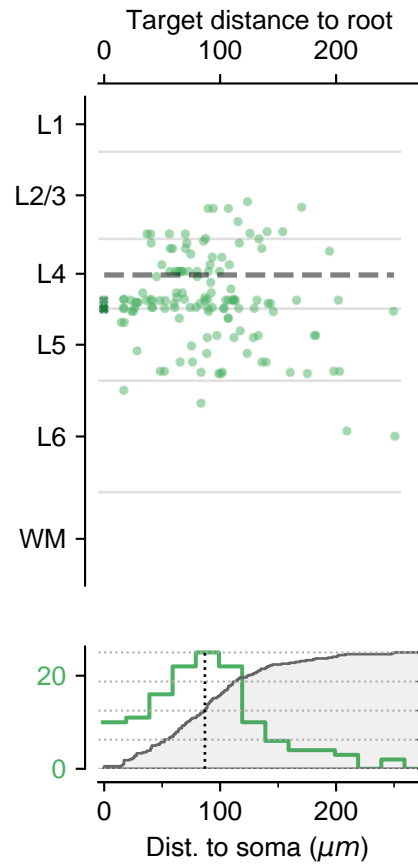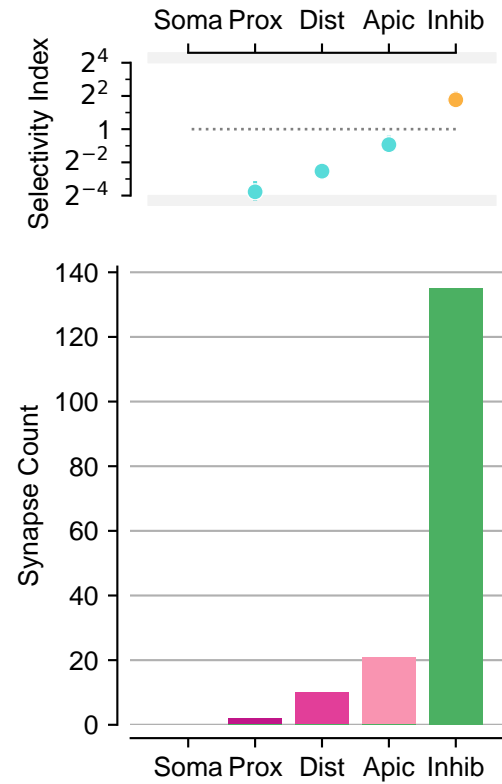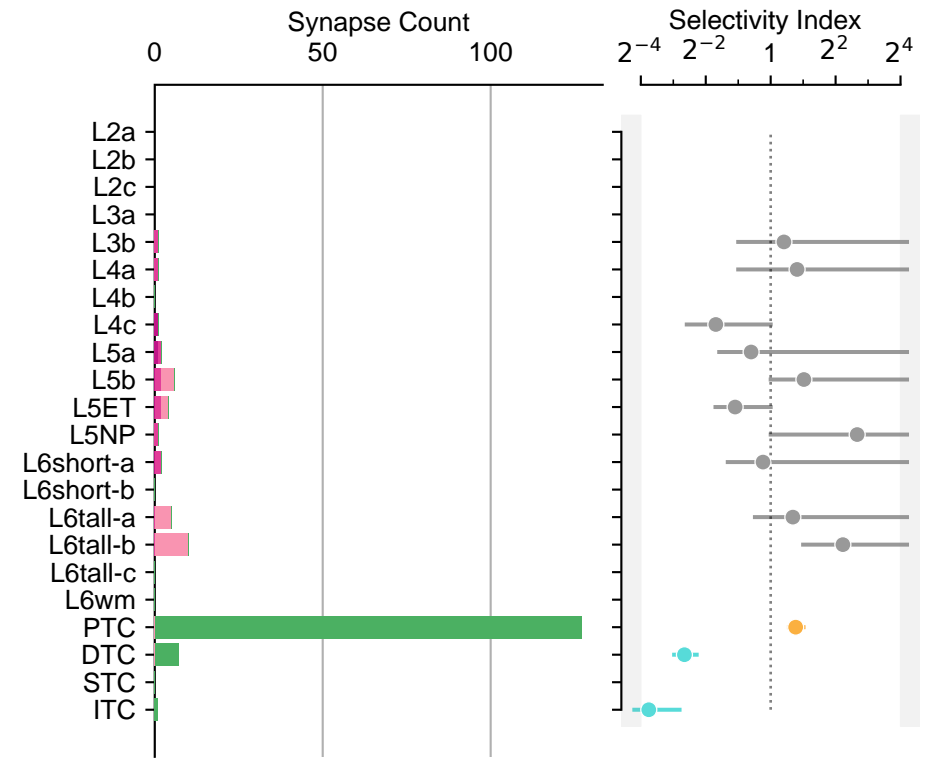

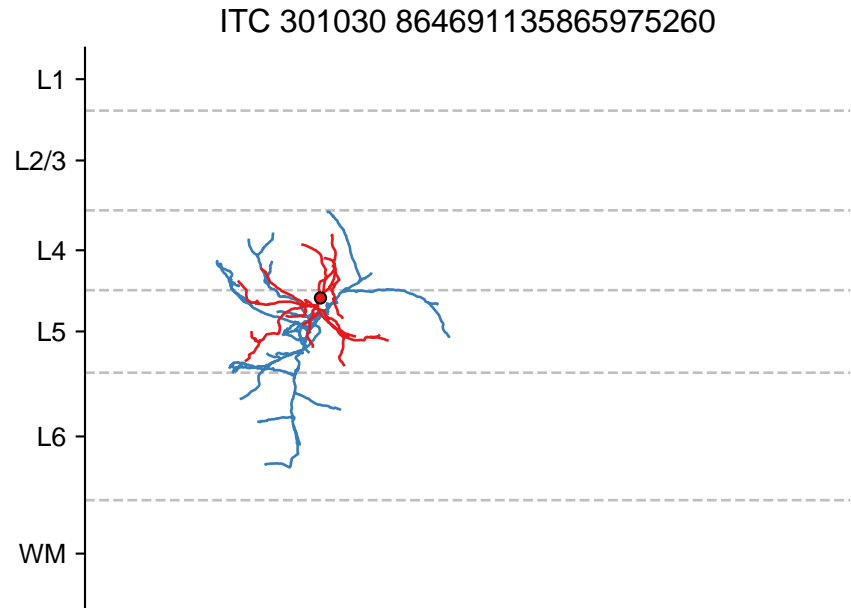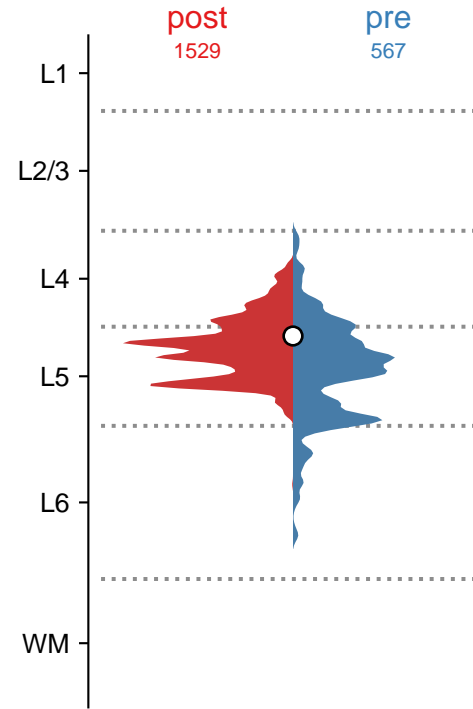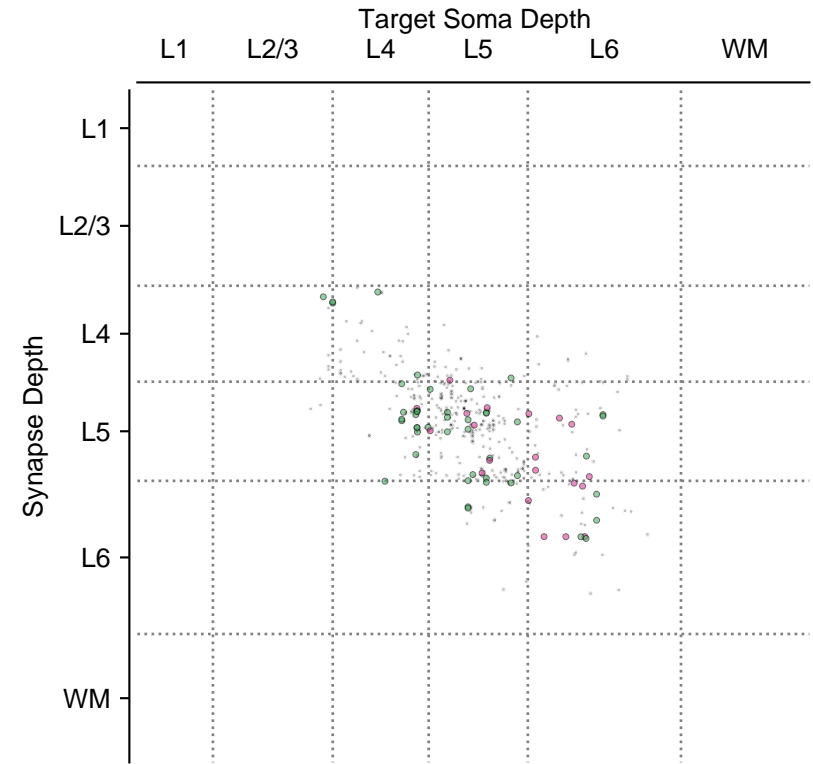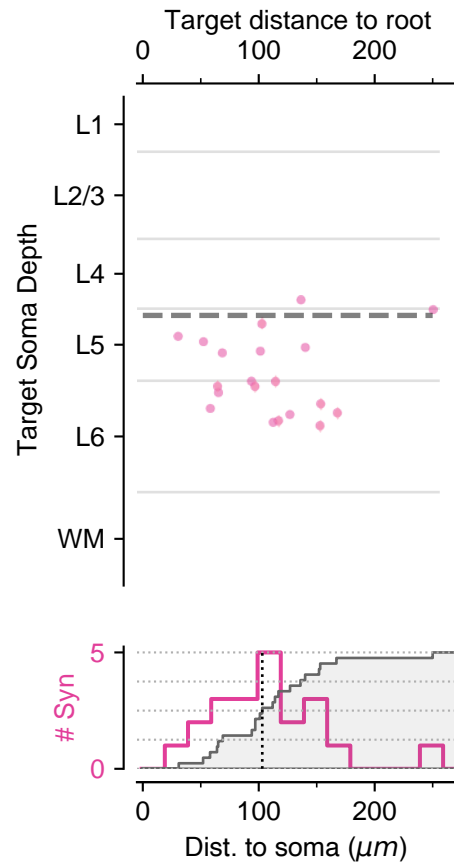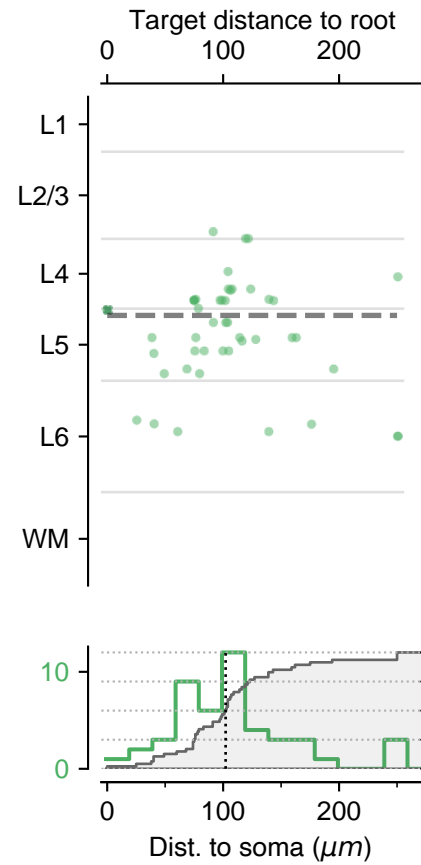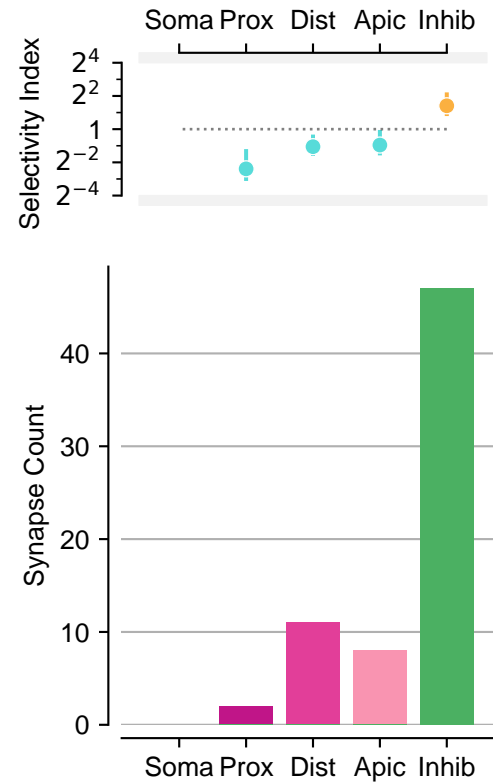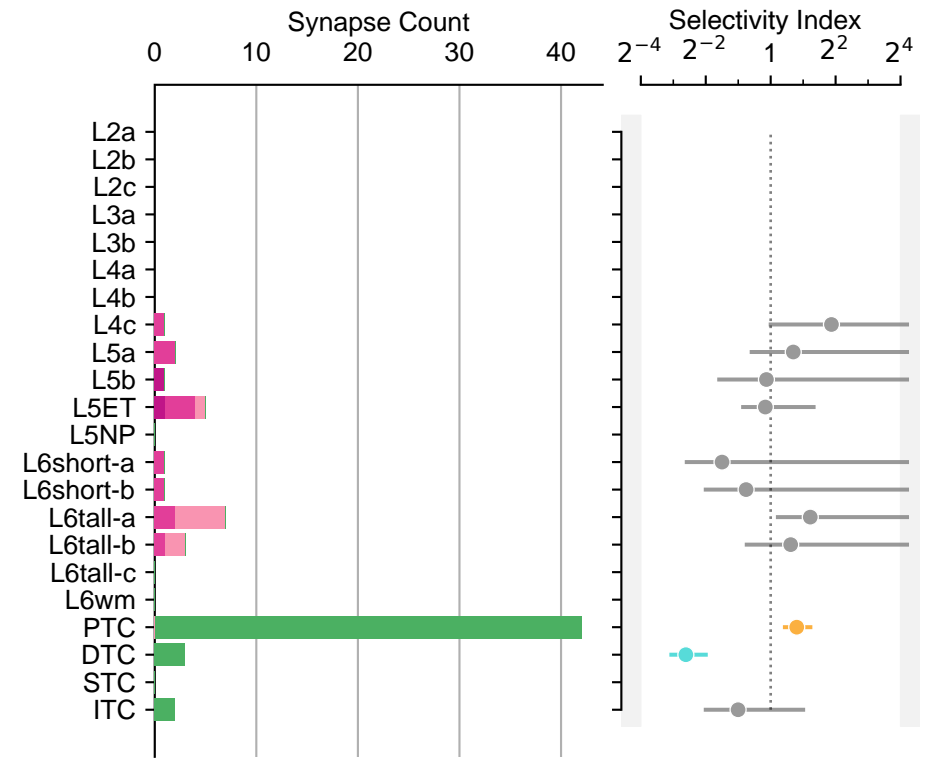

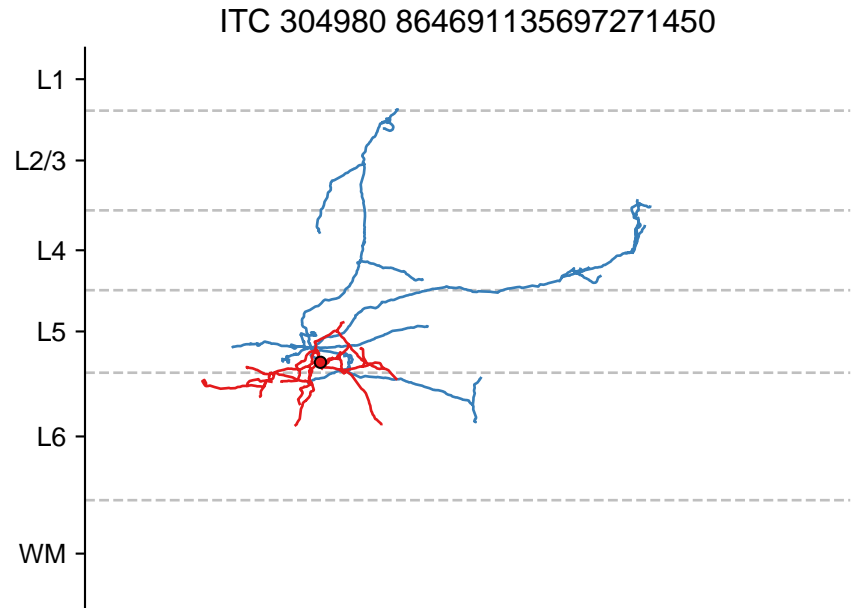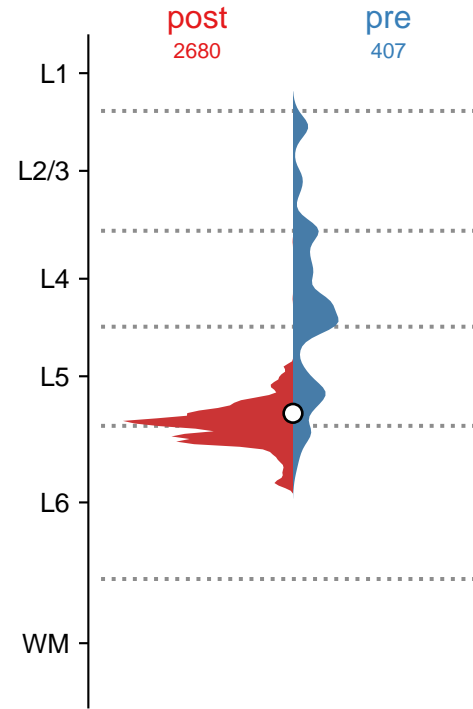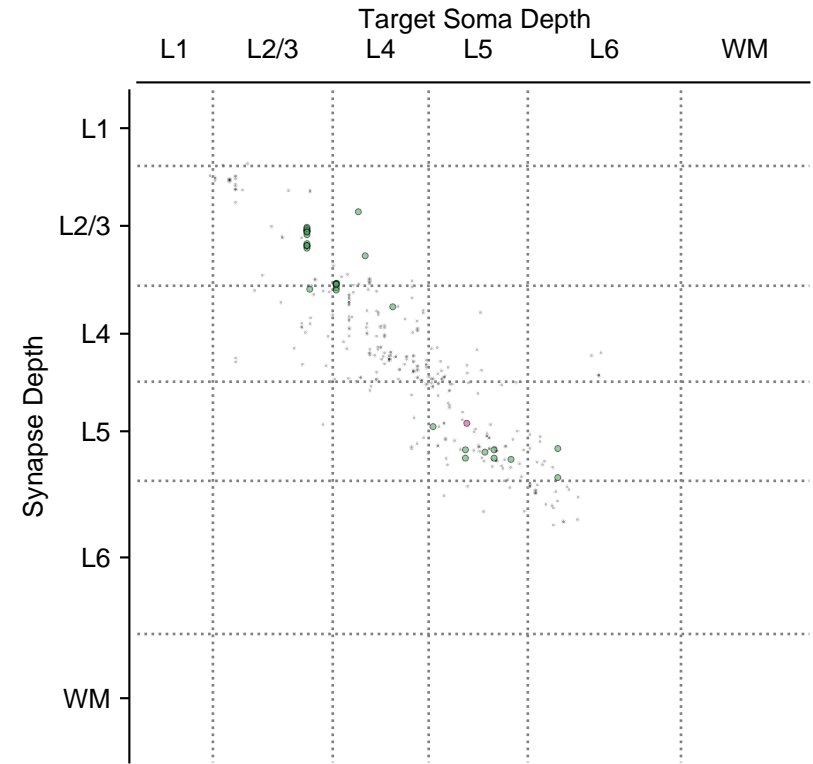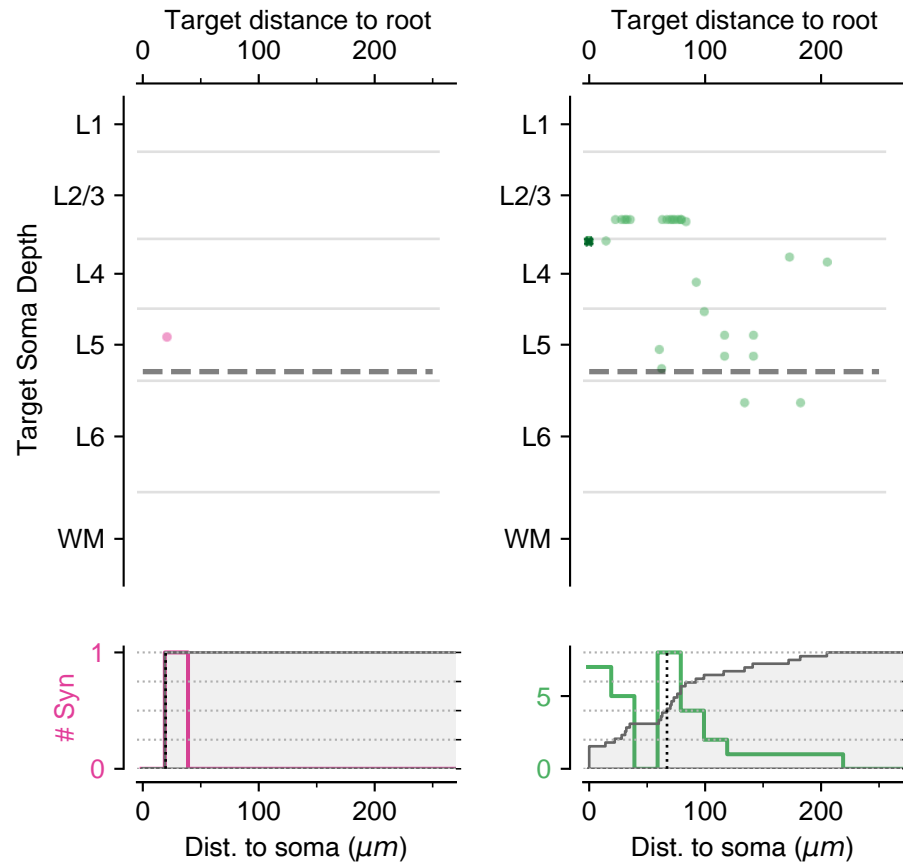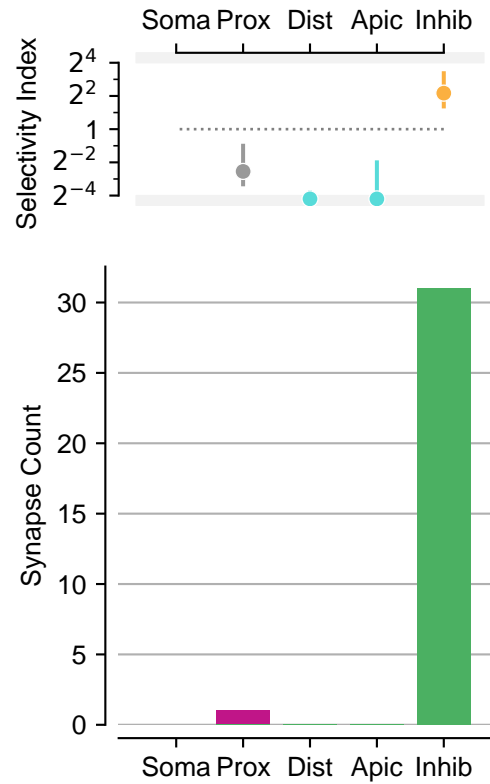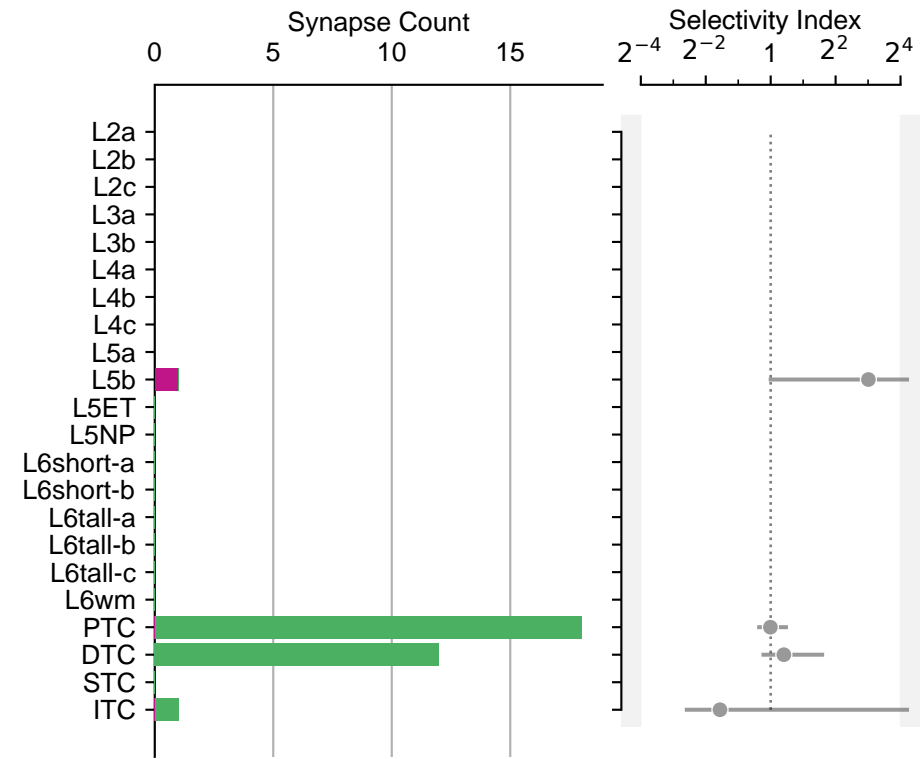

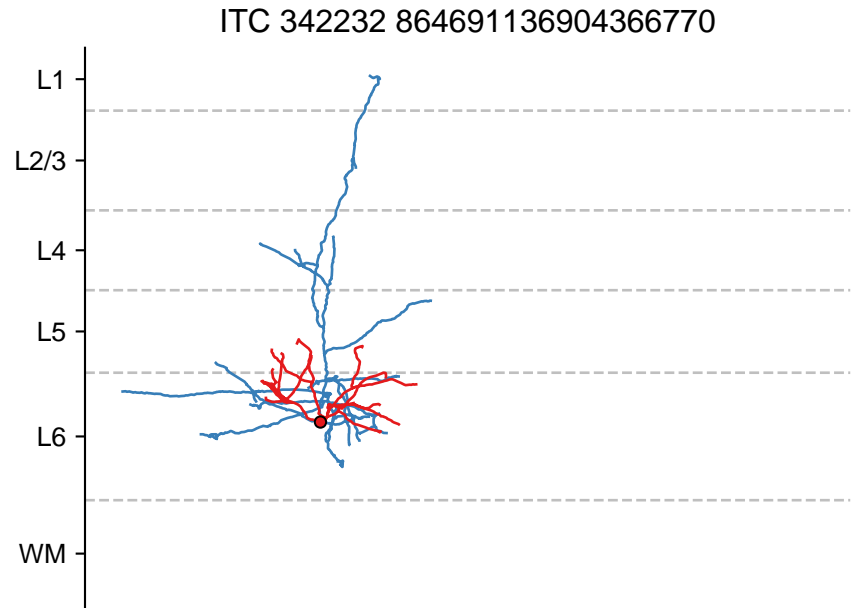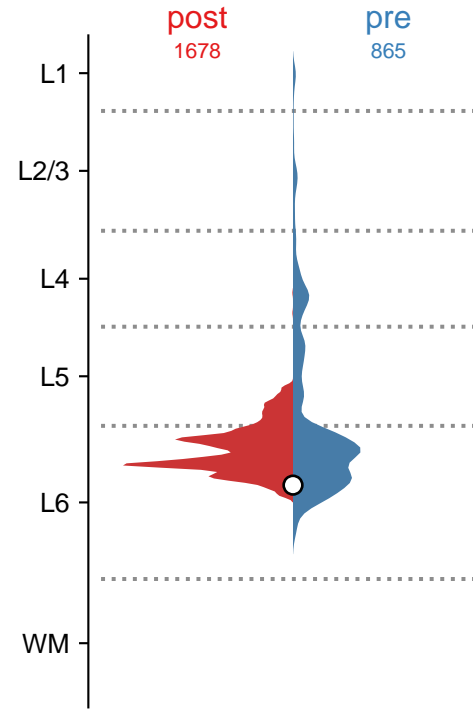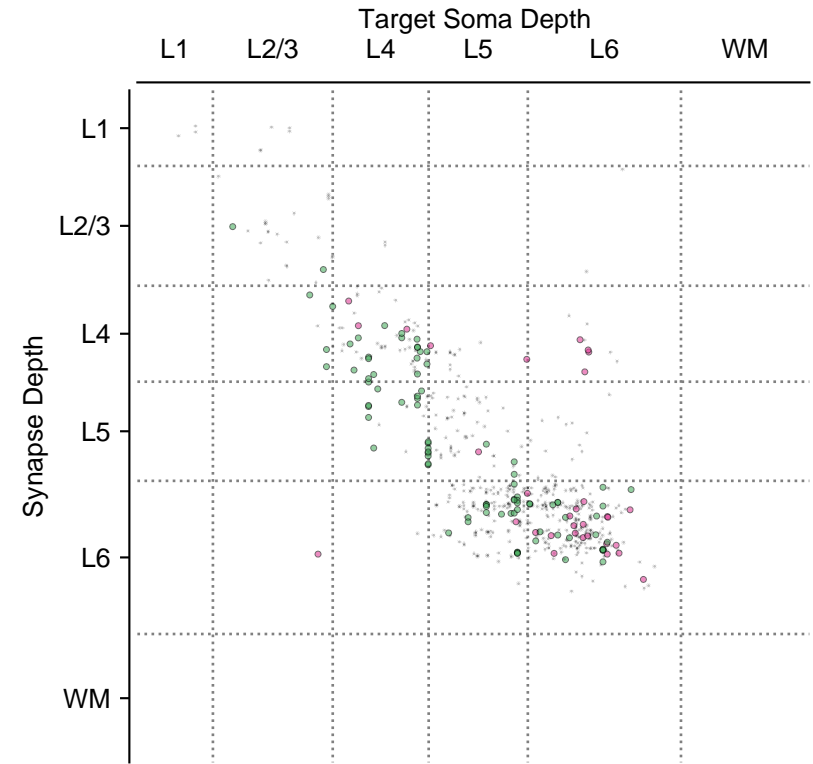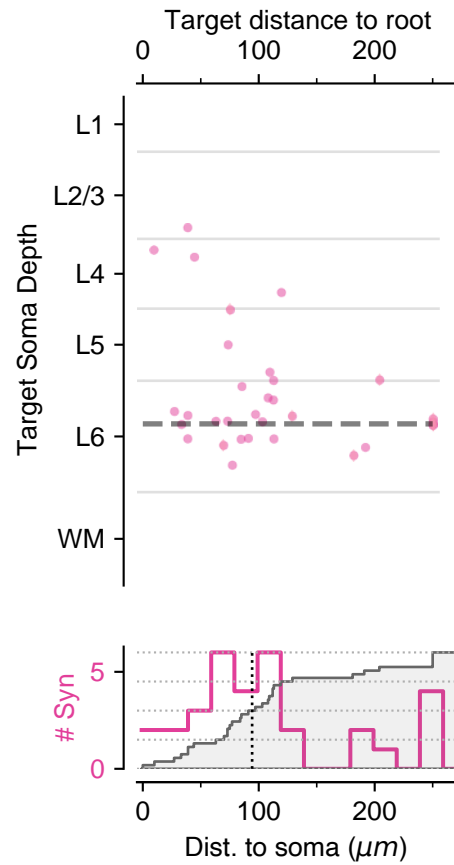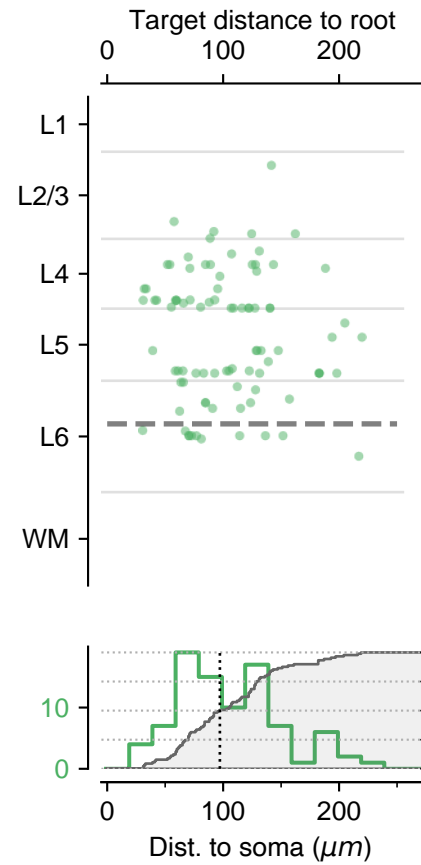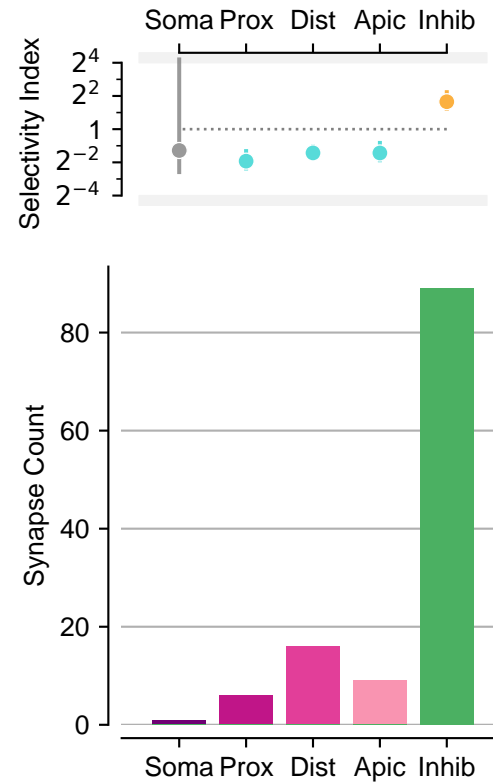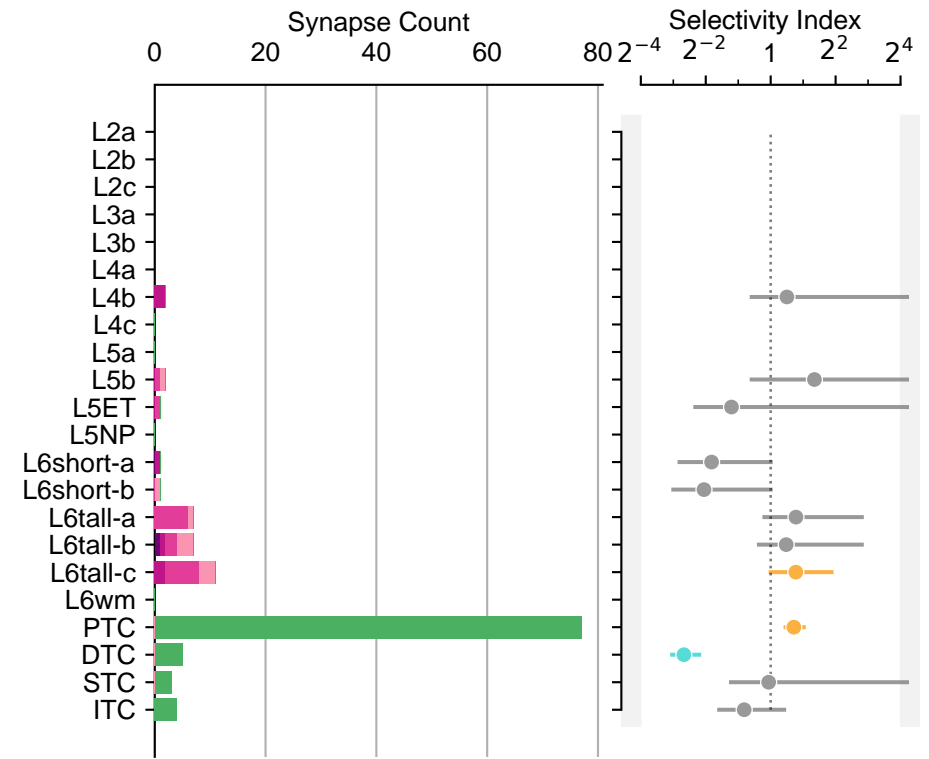

Supplement: media-1.pdf [file media-1.pdf]
