# Supplementary material
Source: PubMed Central journal article supplement (PMC10786554)
Supplement: NIHPP2023.01.23.525290V3-supplement-1.pdf [file NIHPP2023.01.23.525290V3-supplement-1.pdf]

## Supplemental Information

### Extended Data Figure 1

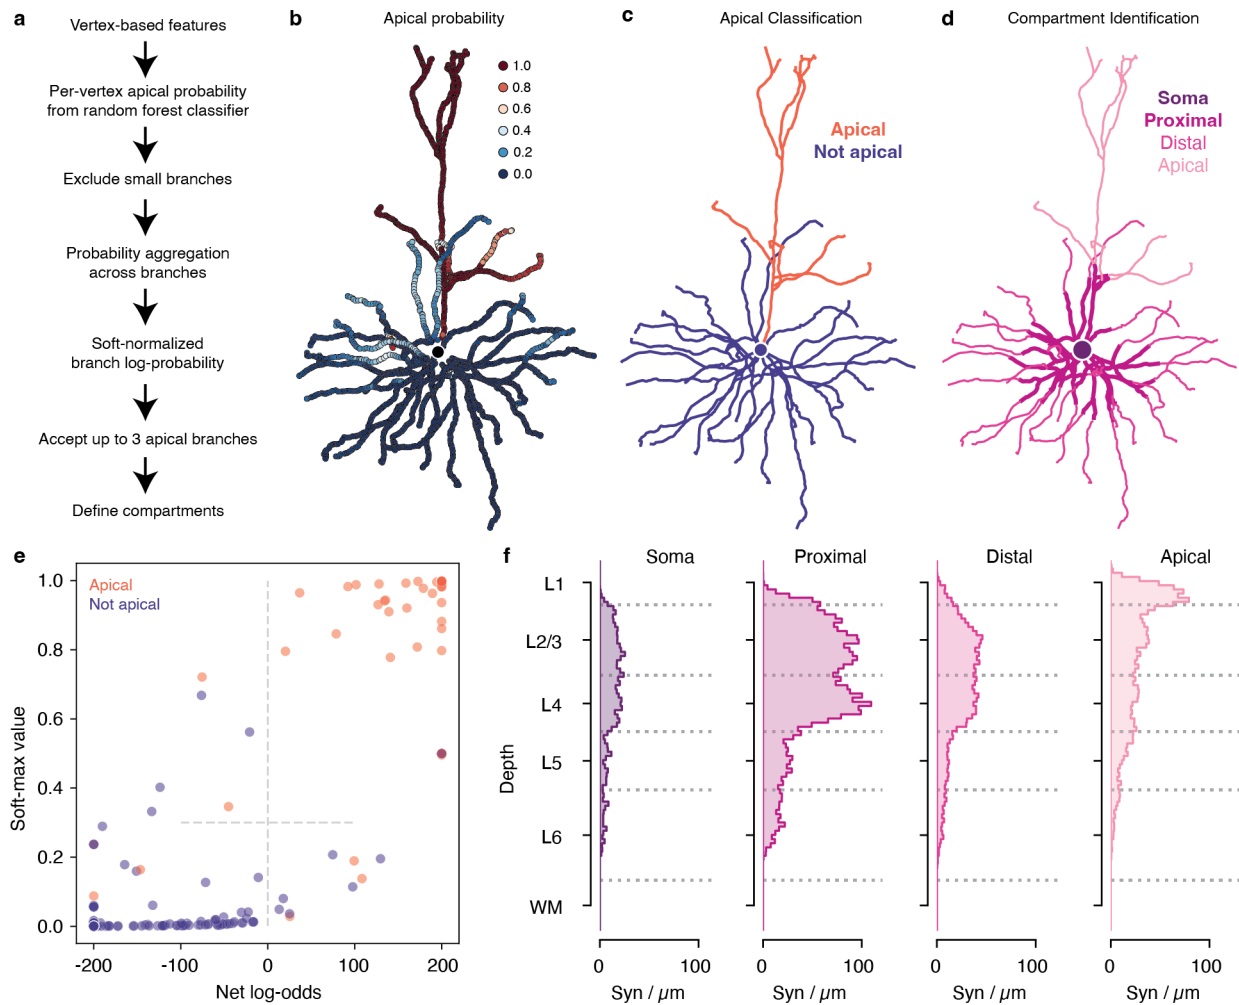

**Extended Data Figure 1.** Compartment classification pipeline. **a)** Description of the compartment classification pipeline. **b–d)** Pipeline applied to an example layer 3 pyramidal cell. **b)** Apical probability per vertex. **c)** Branch-level apical classification. **d)** Final organization into four dendritic compartments based on apical classification and distance rules. **e)** Quantification of quality of apical branch classification based on leave-one-out classification with a training set based on 50 randomly selected cells and 23 cells chosen to improve difficult classifications. Each dot is a branch of a test pyramidal cell, colored red if apical and blue if not apical. X-axis is the net log-odds of the branch being apical (capped at  $\pm 200$ ) and the y-axis is the relative apical quality based on a soft-max operation (see Methods for details). Branches in the upper right quadrant were classified as apical. The method was able to correctly classify at least one apical branch for all cells, and "false positives" were often associated with borderline cases. **f)** Distribution of synaptic inputs onto excitatory neurons with depth by dendritic compartment. Values are based on counting synapses in bins at a given depth, but at any location laterally.

## Extended Data Figure 2

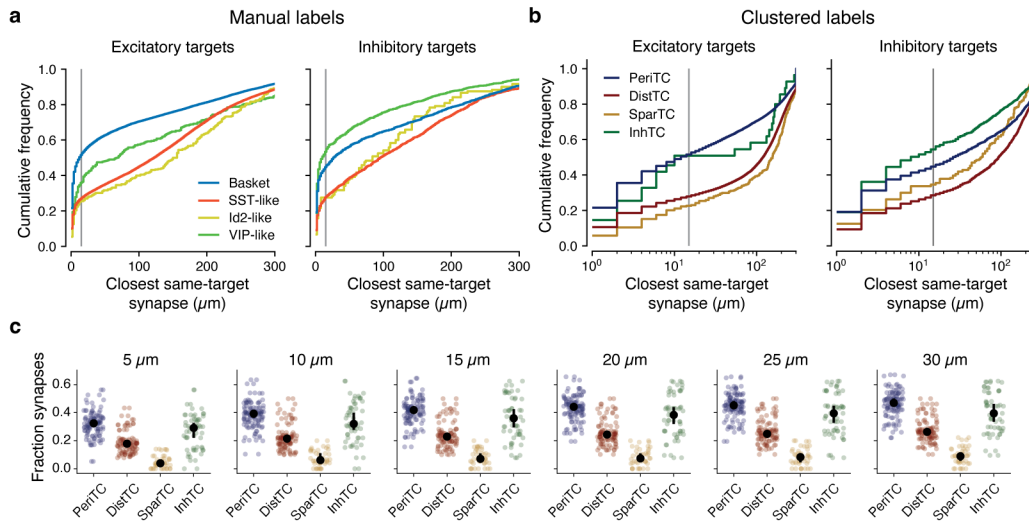

**Extended Data Figure 2.** Closest distances between synapses in multisynaptic connectives. **a)** Cumulative distributions of the closest synapse onto the same target along the axonal arbor per manually labeled inhibitory neuron subclass. Excitatory (left) and inhibitory (right) targets shown separately. Vertical gray line indicates the value used for "clumpiness" in the main text. **b)** Same as **a**, but for the cluster-based labels and with log scale to highlight shorter distances. **c)** The "clumpiness" metric using different distance thresholds. The qualitative relationships are extremely robust to distance thresholds.

## Extended Data Figure 3

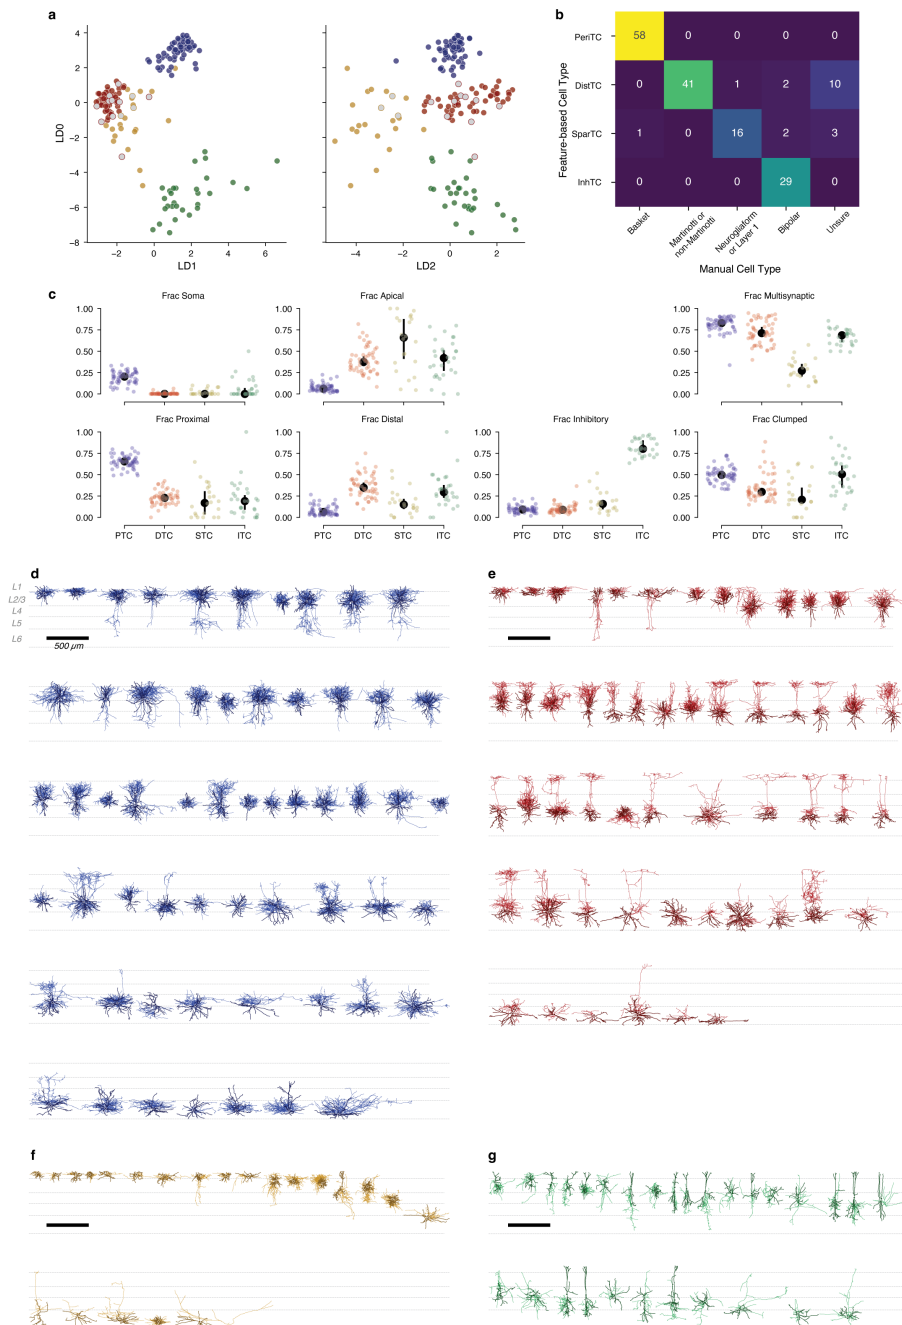

**Extended Data Figure 3.** Inhibitory neuron properties. **a**) Projections of all analyzed interneurons ( $n=163$ ) projected on a 3-d space based on linear discriminant analysis (LDA) using connectivity features (shown in **c**). Fully colored dots indicate manually classified cells used as training data for LDA, while dots with grey centers were labeled based on this classification. **b**) Matrix showing relationship between anatomical subclasses and manual classifications. **c**) Individual connectivity features, organized by subclass. Colored dots are individual cells, black dots indicate median with error bars showing a bootstrapped 95% confidence interval. **d–g**) Morphology of all PeriTCs (**d**), DistTCs (**e**), SparTCs (**f**), and InhTCs (**g**). Scale bars are  $500 \mu m$ . Dark and thick lines are dendrite, thinner and lighter are axon. Cells are ordered by soma depth.

## Extended Data Figure 4

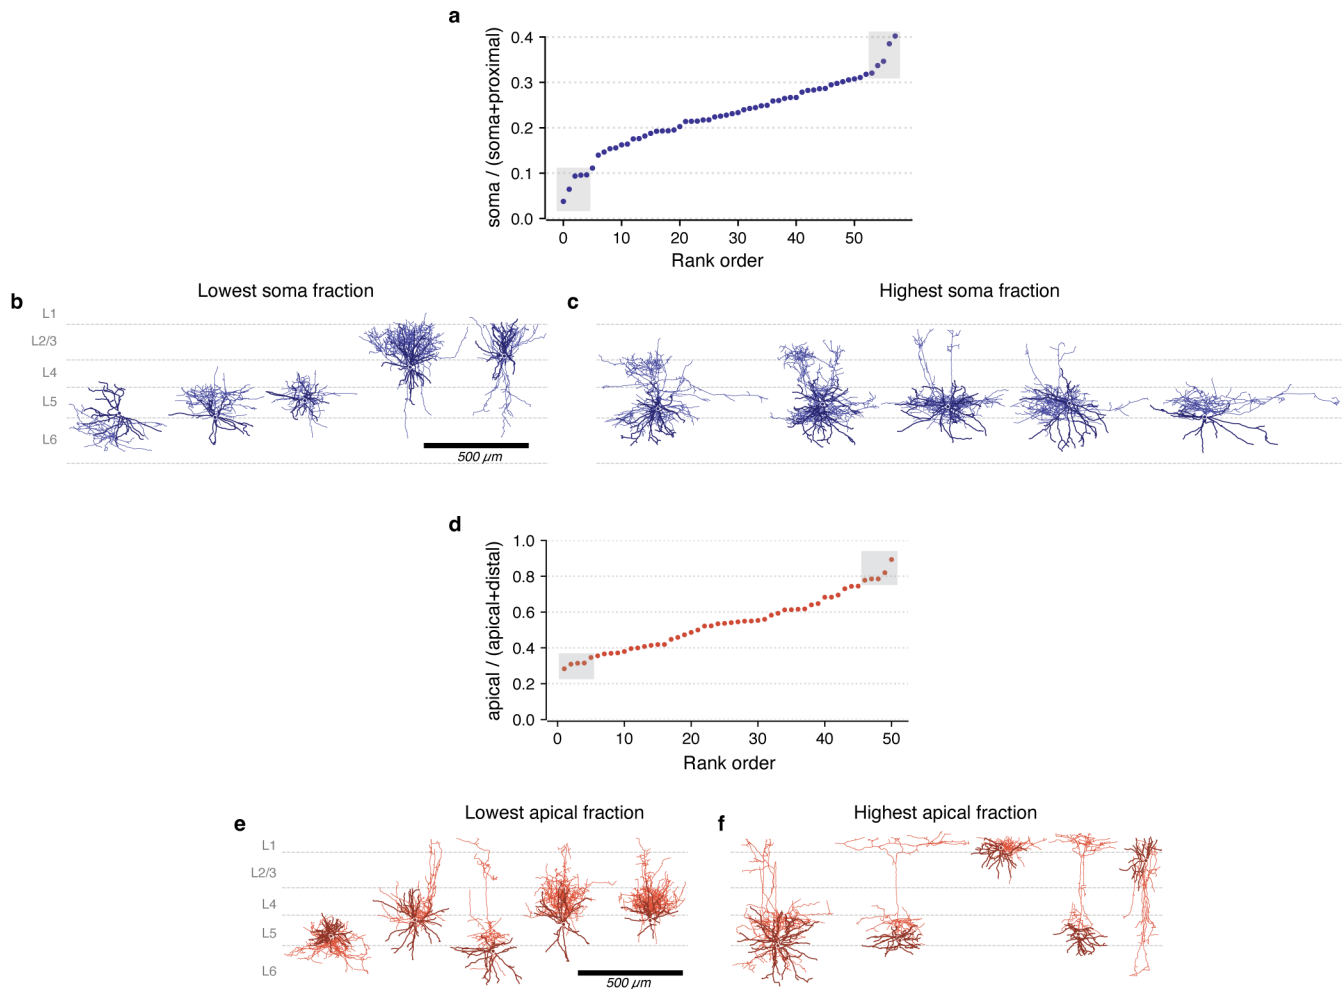

**Extended Data Figure 4.** Diversity of compartment targeting within perisomatic targeting cells and distal dendrite targeting cells. **a)** Among PeriTCs, the rank-ordered fraction of output synapses targeting somata as a fraction of synapses targeting either somata or proximal dendrites (but not distal or apical dendrites). Boxes indicate the top and bottom five cells, shown below. **b)** The five PeriTC cells with the lowest soma fraction, ordered as in **a**. **c)** The five PeriTC cells with the highest soma fraction, ordered as in **a**. **d)** Among DistTCs, the rank-ordered fraction of output synapses targeting apical synapses among only those synapses targeting apical or distal dendrites. **e)** The five DistTC cells with the lowest apical fraction, ordered as in **a**. **f)** The five DistTC cells with the highest apical fraction, ordered as in **a**.

## Extended Data Figure 5

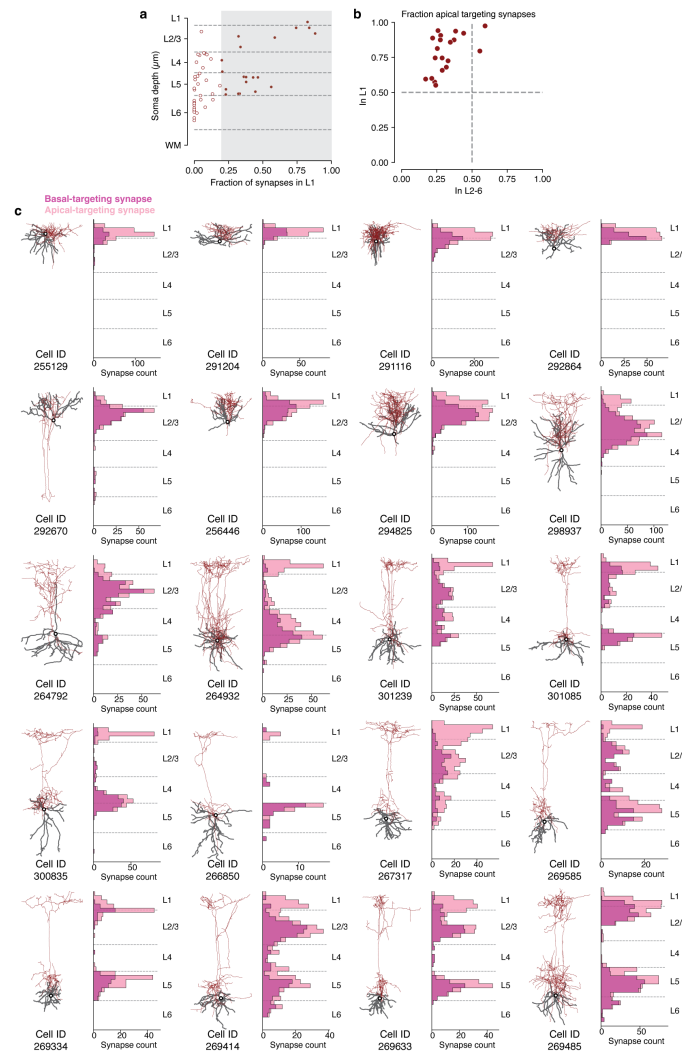

**Extended Data Figure 5.** Compartment targeting of Martinotti cells across layers. **a)** DistTC cells have differing fractions of synaptic outputs in layer 1. For the purposes of this figure, we focus on cells with more than 20% of their outputs in layer 1 (gray region, filled circles). **b)** For each DistTC with 20%+ layer 1 output, we measured the fraction of outputs onto apical dendrites among target excitatory cells in the column as a function of synapse depth. The y-axis reflects the apical fraction among synapses in layer 1, while the x-axis reflects the apical fraction among synapses in all deeper layers. For all such cells, the majority of layer 1 targets were onto apical dendrites, while in 18/20 cells the output in other layers was majority of targets were onto basal dendrites. **c).** Target distributions of individual cells. For each DistTC with 20%+ layer 1 output (morphology at left), we computed the histogram of synapses targeting apical vs basal compartments on excitatory neurons. Note that for most cells with cell bodies in layer 4 and below, there is both a layer 1 arborization that primarily targets apical dendrites and a deeper arborization that largely targets basal dendrites.

## Extended Data Figure 6

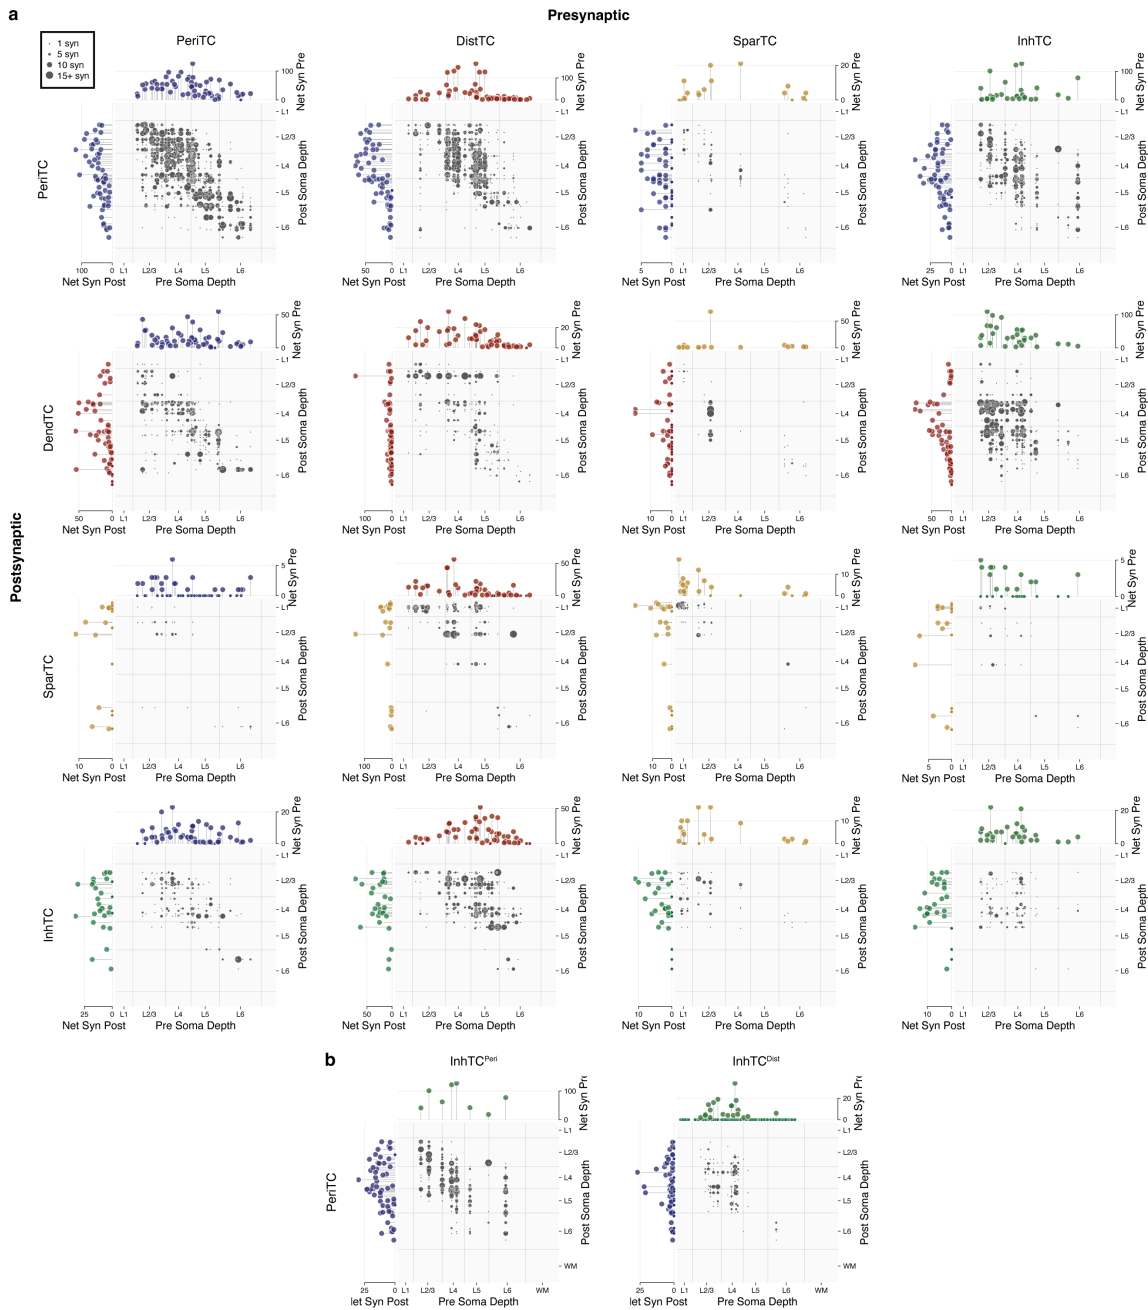

**Extended Data Figure 6.** Inhibition of inhibition. **a**) Connectivity dotplot between inhibitory neurons, organized by inhibitory subclasses, organized by soma depth. For each panel, the scatterplot reflects the connectivity from cells in the presynaptic subclass (x-axis) to cells in the postsynaptic subclass (y-axis). Each dot is a single connection, with larger dots having more synapses. The location of each dot corresponds to the depth of the pre- and post-synaptic cell bodies. Stem plots on top and side indicate the net synaptic inputs and net synaptic outputs of each cell in each subclass within the column sample. **b**) Same as **a**, but for  $\text{InhTC}^{\text{Peri}}$  and  $\text{InhTC}^{\text{Dist}}$  onto  $\text{PeriTC}$ s separately.

## Extended Data Figure 7

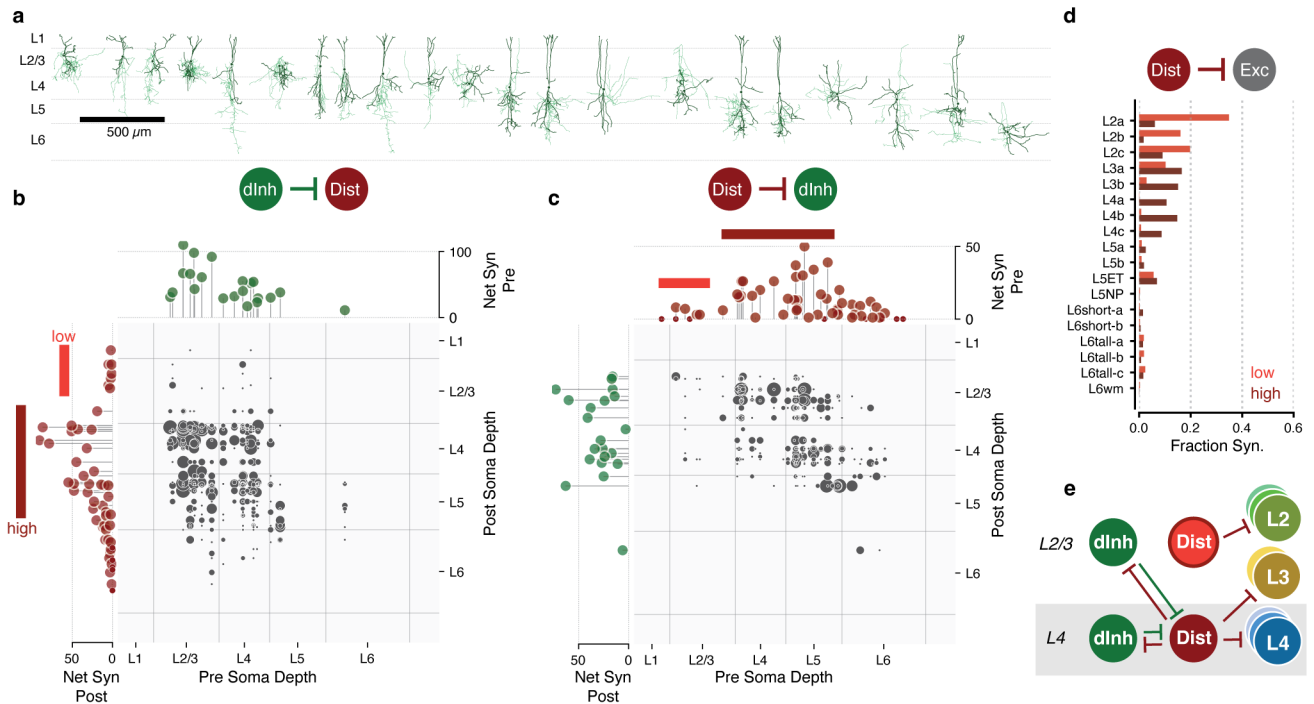

**Extended Data Figure 7.** A laminar-specific circuit for InhTC<sup>dist</sup> cells. **a)** Morphology of all InhTC that preferentially target DistTCs. Cells are sorted by soma depth. **b)** Connectivity dotplot for synapses from InhTC<sup>dist</sup> onto DistTCs. In the grid, each dot represents a connection from one InhTC onto one DistTC, with the number of synapses indicated by dot size. The location of the dot corresponds to the soma depth of the pre- and post-synaptic cells. Stem plots on top and side indicate the net synaptic inputs and net synaptic outputs of each InhTC<sup>dist</sup> and DistTC. Note that DistTCs in layer 2/3 receive little input from InhTCs, compared to those in layer 4 and upper layer 5. **c)** Connectivity scatterplot for synapses from DistTCs onto InhTC<sup>dist</sup>, as in **b**. Note that the DistTCs in layer 2/3 also form few synaptic outputs onto InhTC<sup>dist</sup>. **d)** Distribution across M-types of synaptic outputs across low-connection DistTCs and high-connection DistTCs. **e)** Connectivity cartoon suggested by this data.

## Extended Data Figure 8

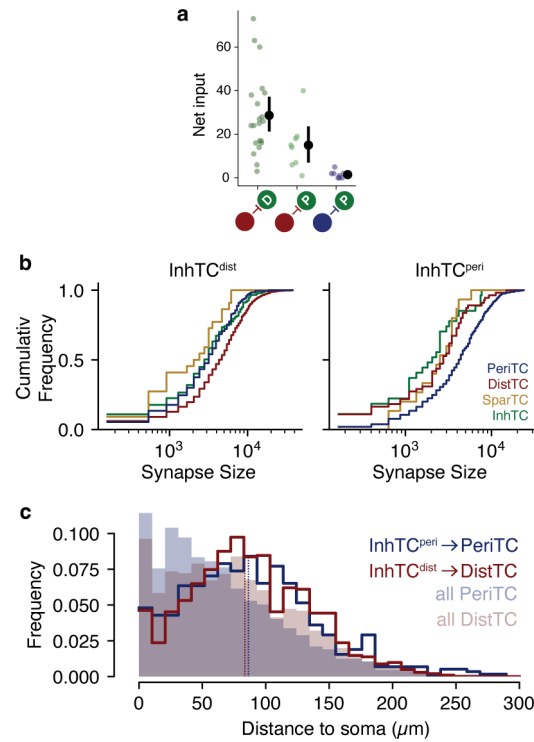

**Extended Data Figure 8.** Additional InhTC targeting properties. **a)** Net synapse count onto subtypes of InhTCs. Red indicates DistTCs, blue indicates PeriTCs, and the D and P indicate InhTC<sup>dist</sup> and InhTC<sup>peri</sup> respectively. Colored dots are individual cells, black dots are mean, and error bars are bootstrapped 95% confidence interval for the mean. **b)** Cumulative distribution of synapse sizes of InhTC cells onto different target inhibitory subclasses. Left: InhTC<sup>dist</sup>, Right: InhTC<sup>peri</sup>. **c)** Distribution of synapse location from InhTC subtypes onto preferred targets. Lines indicate observed distribution of synapse distances from soma for the preferred targets of InhTC<sup>dist</sup> and <sup>peri</sup>. Vertical dashed lines indicate median distances. Filled distributions indicate the synapse distance distribution of all synaptic inputs for the two target Inhibitory subclasses. Synapse locations onto target cells are nearly identical in both average and distribution between the two InhTC subclasses.



## Extended Data Figure 9

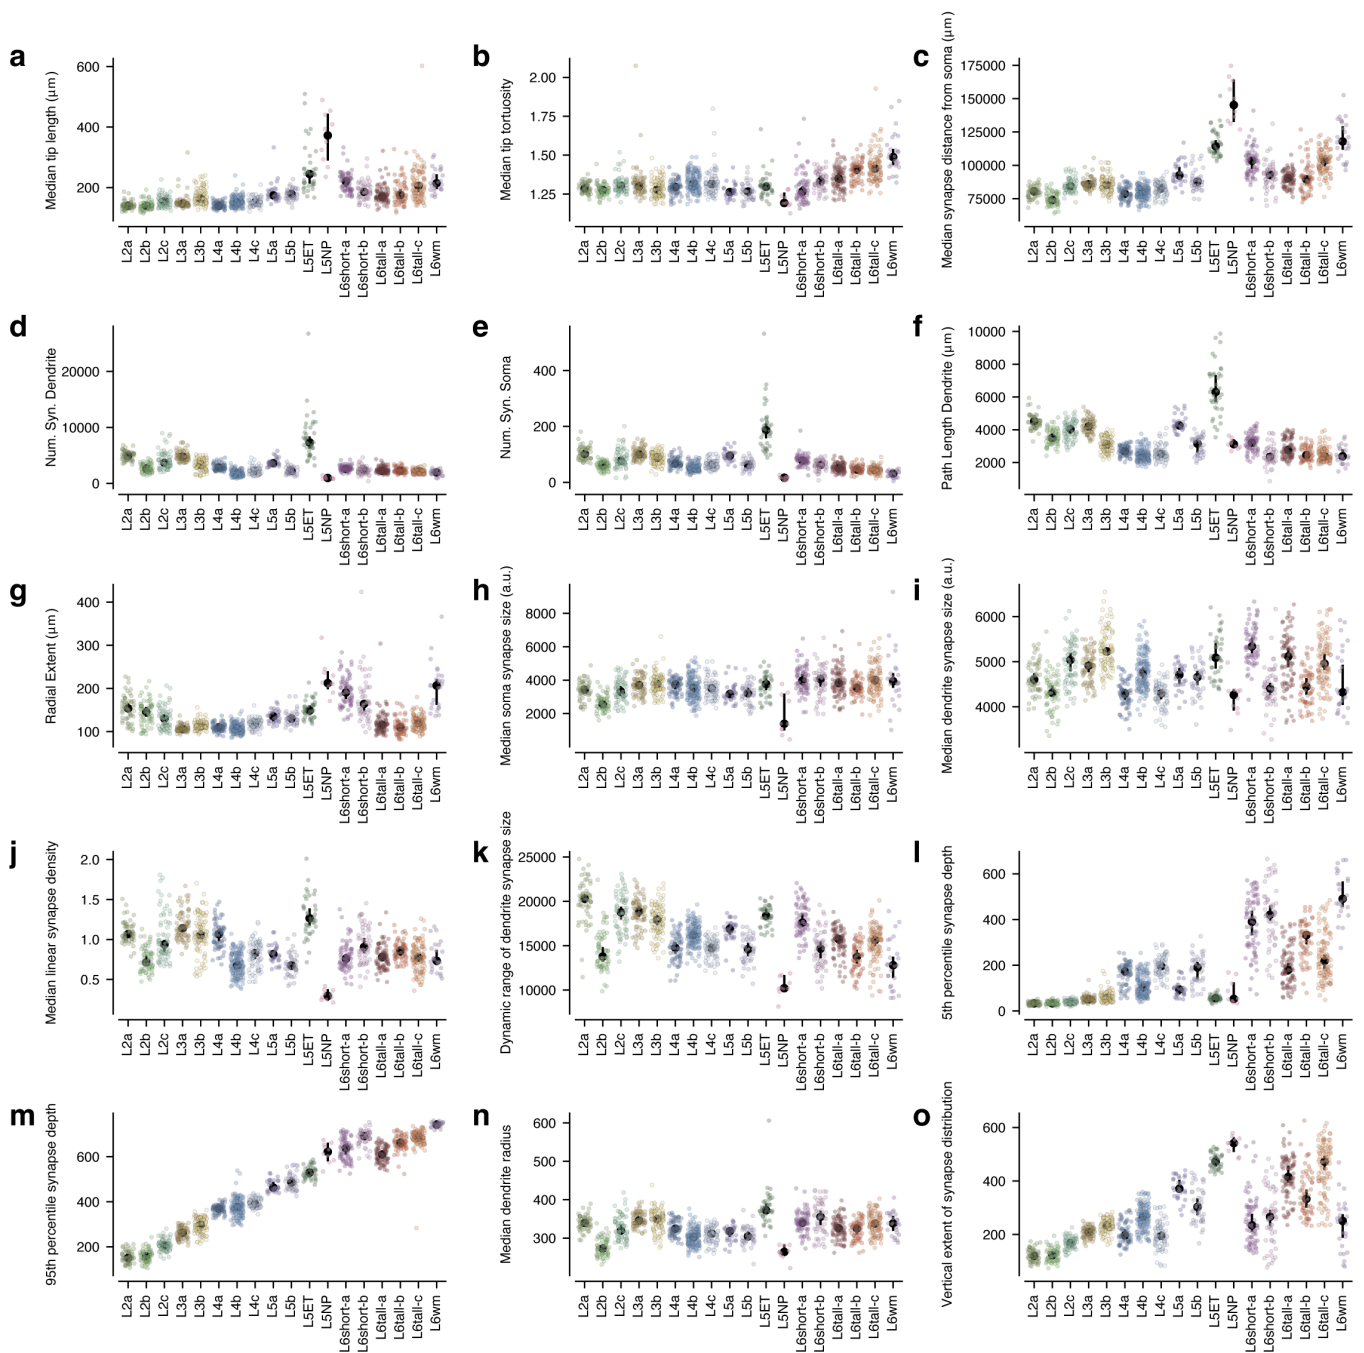

**Extended Data Figure 9.** Dendritic features — properties. Features used for classifying M-types, in addition to data-driven components shown in Extended Data Figure 10. See Methods for full definitions of each feature. Colored dots are individual cells, black dots indicate median, and error bars are a bootstrapped 95% confidence interval of the median. **a)** Median dendritic branch tip length. **b)** Median tip tortuosity. **c)** Median input synapse distance from soma. **d)** Number of dendritic synaptic inputs (not including soma). **e)** Number of synaptic inputs on soma. **f)** Net path length of the dendritic arbor. **g)** Radial extent of dendritic arbor, from slanted streamline. **h)** Median size of input synapse onto soma. **i)** Median size of input synapse onto dendrites. **j)** Median linear input synapse density. **k)** Range of synapse sizes, measured as difference between 95th to 5th percentile. **l)** Shallowest extent of synapse distribution, measured as the 5th percentile of input synapse depth. **m)** Deepest extent of synapse distribution, measured as the 95th percentile of synapse depth. **n)** Median dendrite radius. **o)** Height of synapse distribution, measured as the difference between 95th and 5th percentile of synapse depth.

## Extended Data Figure 10

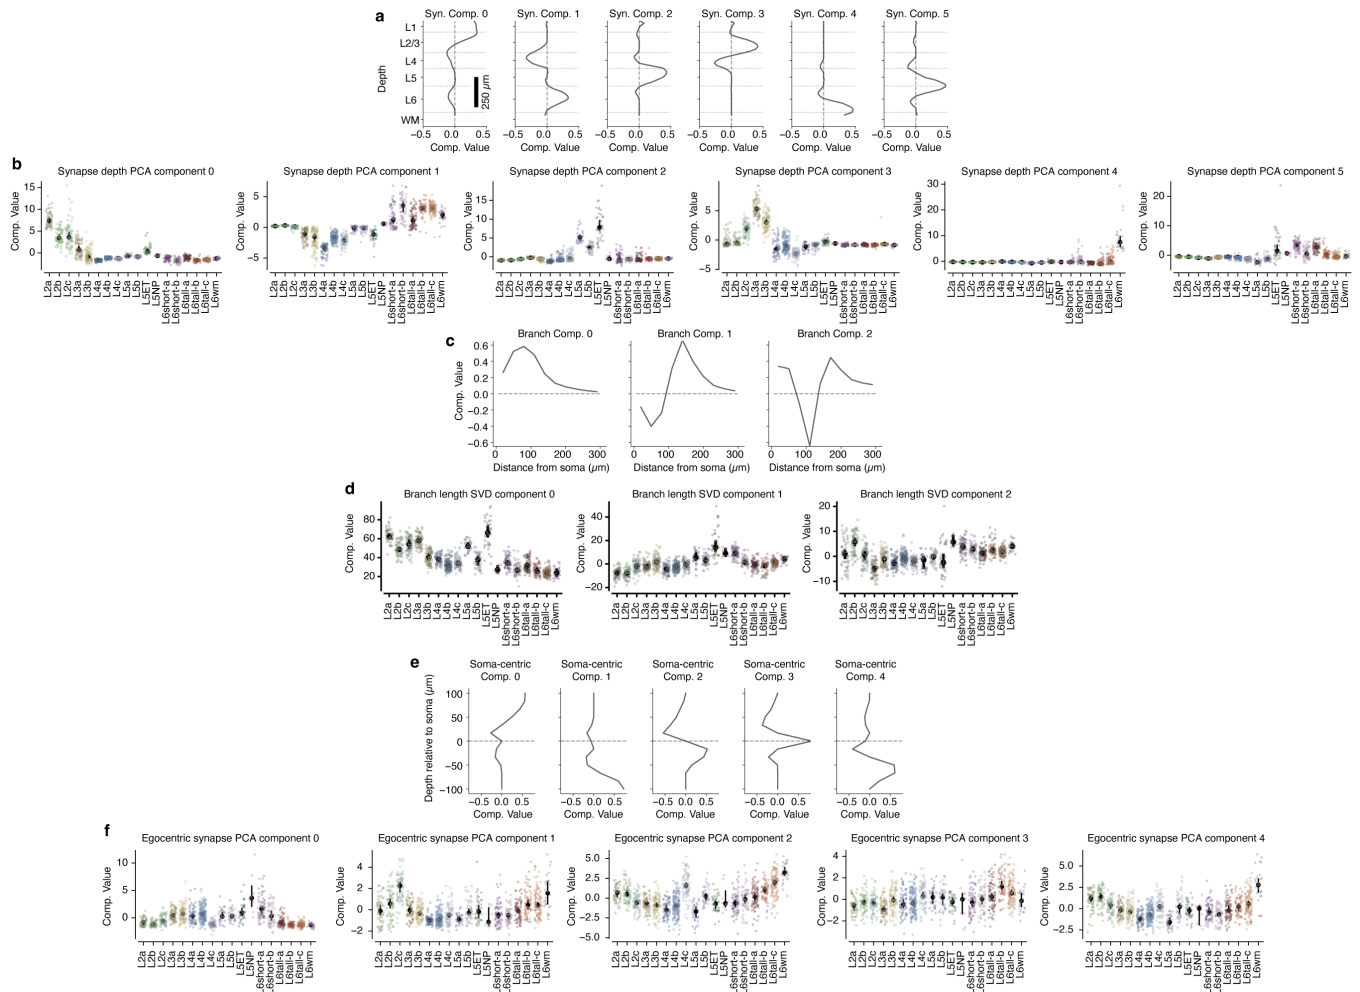

**Extended Data Figure 10.** Dendritic features — compartment loadings. Several of the M-type features were based on data-driven components in addition to the basic features shown in Extended Data Figure 9. **a**) SparsePCA components of synapse count across 50 depth bins (approximately  $20\mu\text{m}$  per bin) across all excitatory neurons. **b**) Loadings of each resulting M-type cluster onto the components in **a**. Each colored dot is a cell, black dots are median with error bars indicating bootstrapped confidence interval of the median. **c**) Singular value decomposition (SVD) components of the number of distinct branches as a function of distance from the soma in  $30\mu\text{m}$  increments. **d**) Loadings of each resulting M-type cluster onto the branching SVD components in **c**. **e**) SparsePCA components of synapse count as a function of depth relative to the soma location, measured in 13 uniform bins from  $100\mu\text{m}$  below the soma to  $100\mu\text{m}$  above the soma. **f**) Loadings of each resulting M-type cluster onto the soma-centric synapse components in **e**.

## Extended Data Figure 11

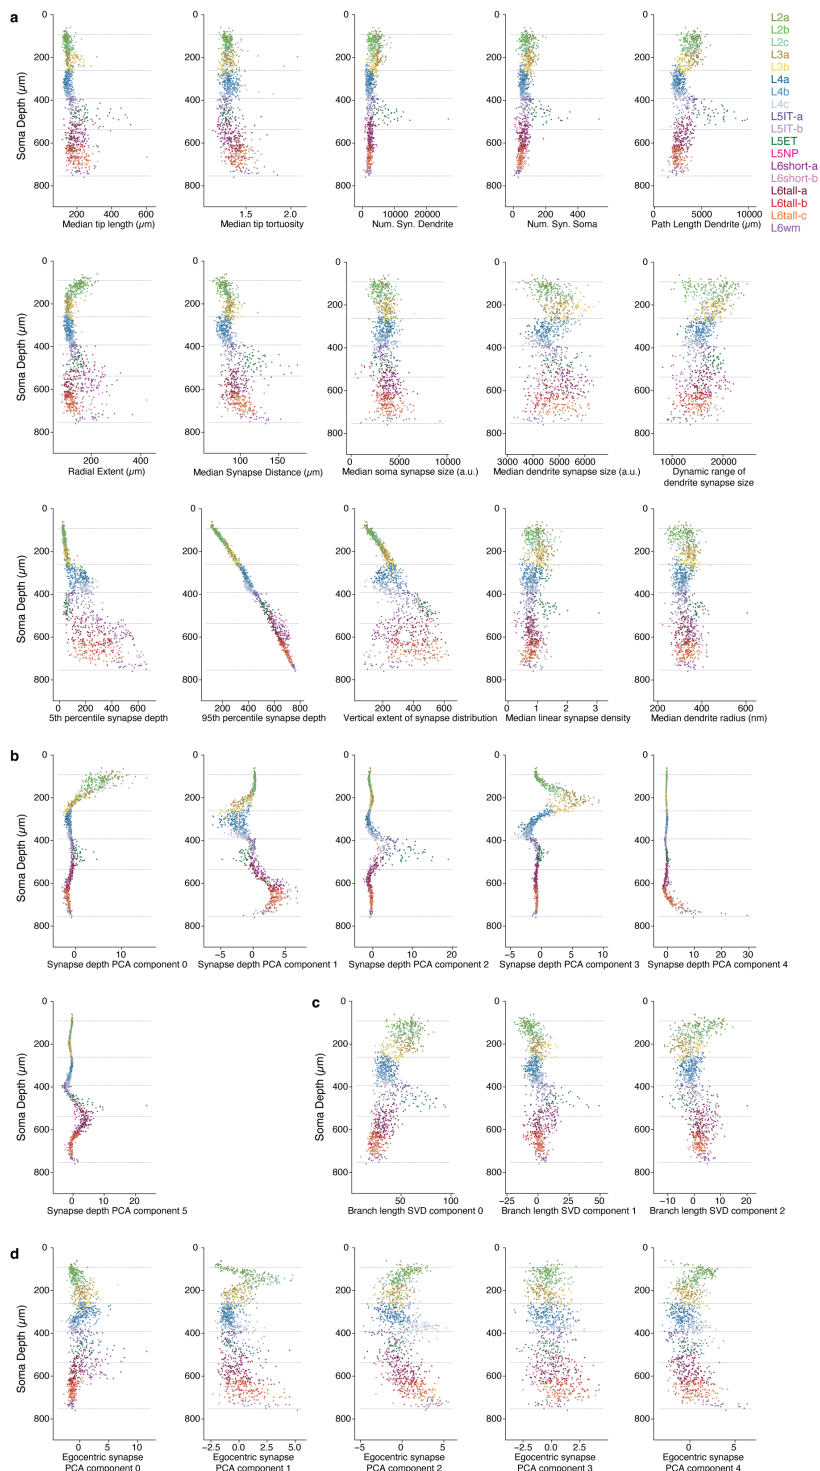

**Extended Data Figure 11.** Dendritic properties as a function of depth. For each plot, each dot is an excitatory neuron colored by M-type. The depth of each cell is along the y-axis, while the value of the property is along the x-axis. Approximate layer boundaries are shown with dashed lines. **a)** Individual cell properties. **b)** Synapse depth components. **c)** Branch distribution components. **d)** Soma-centered synapse depth components.

## Extended Data Figure 12

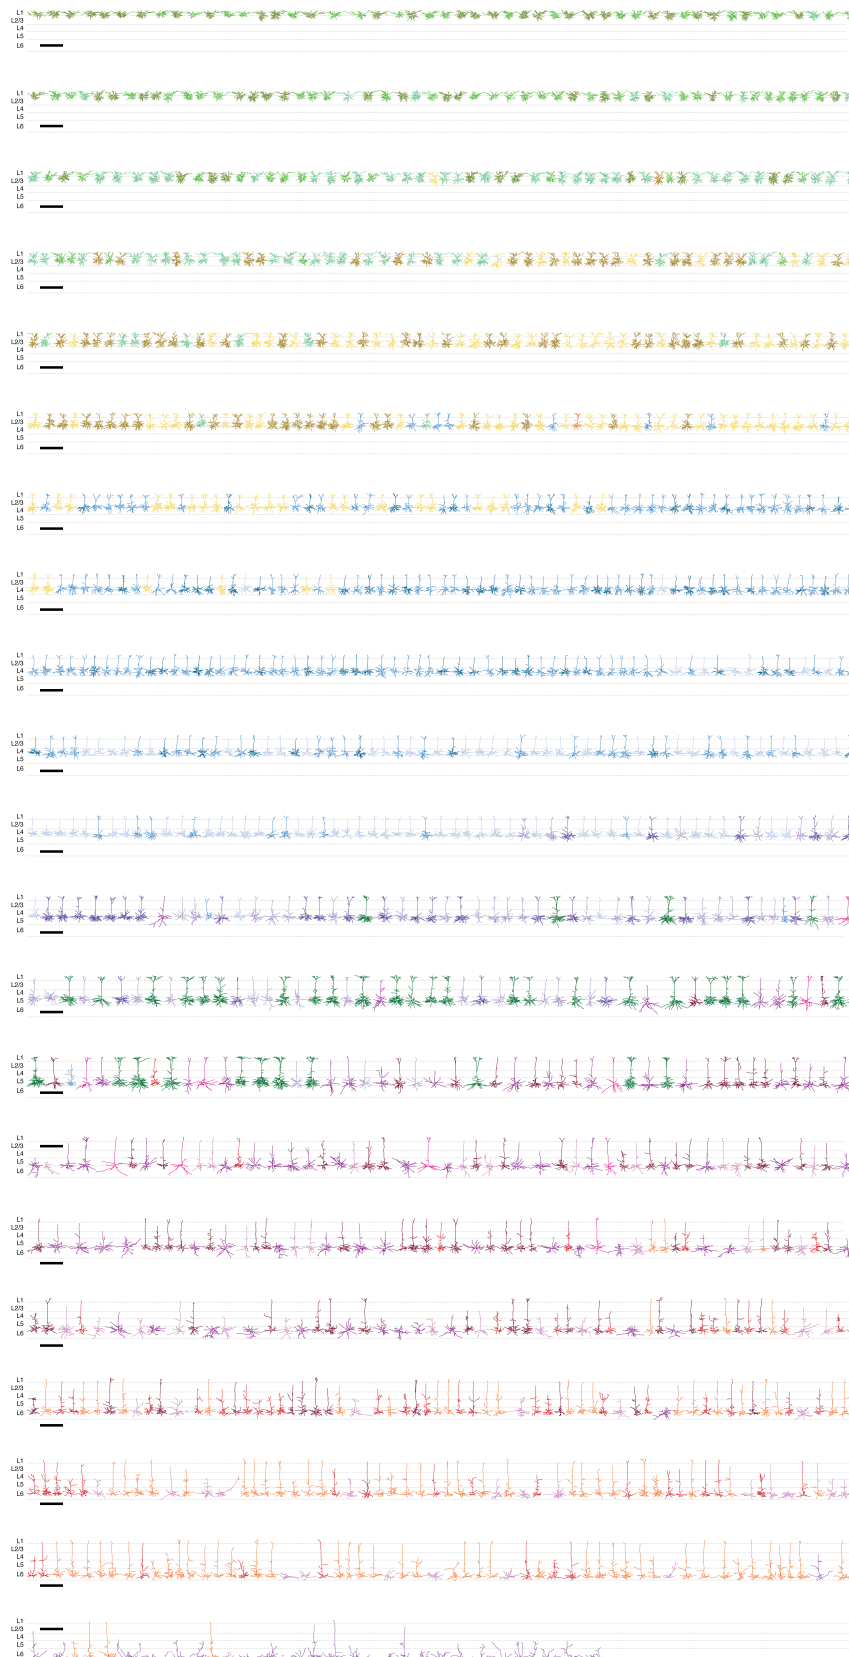

Extended Data Figure 12. See next page

**Extended Data Figure 12.** (Previous page.) Morphology of all excitatory neurons, sorted by soma depth and colored by anatomical class. Scale bar is 500  $\mu m$ .

## Extended Data Figure 13

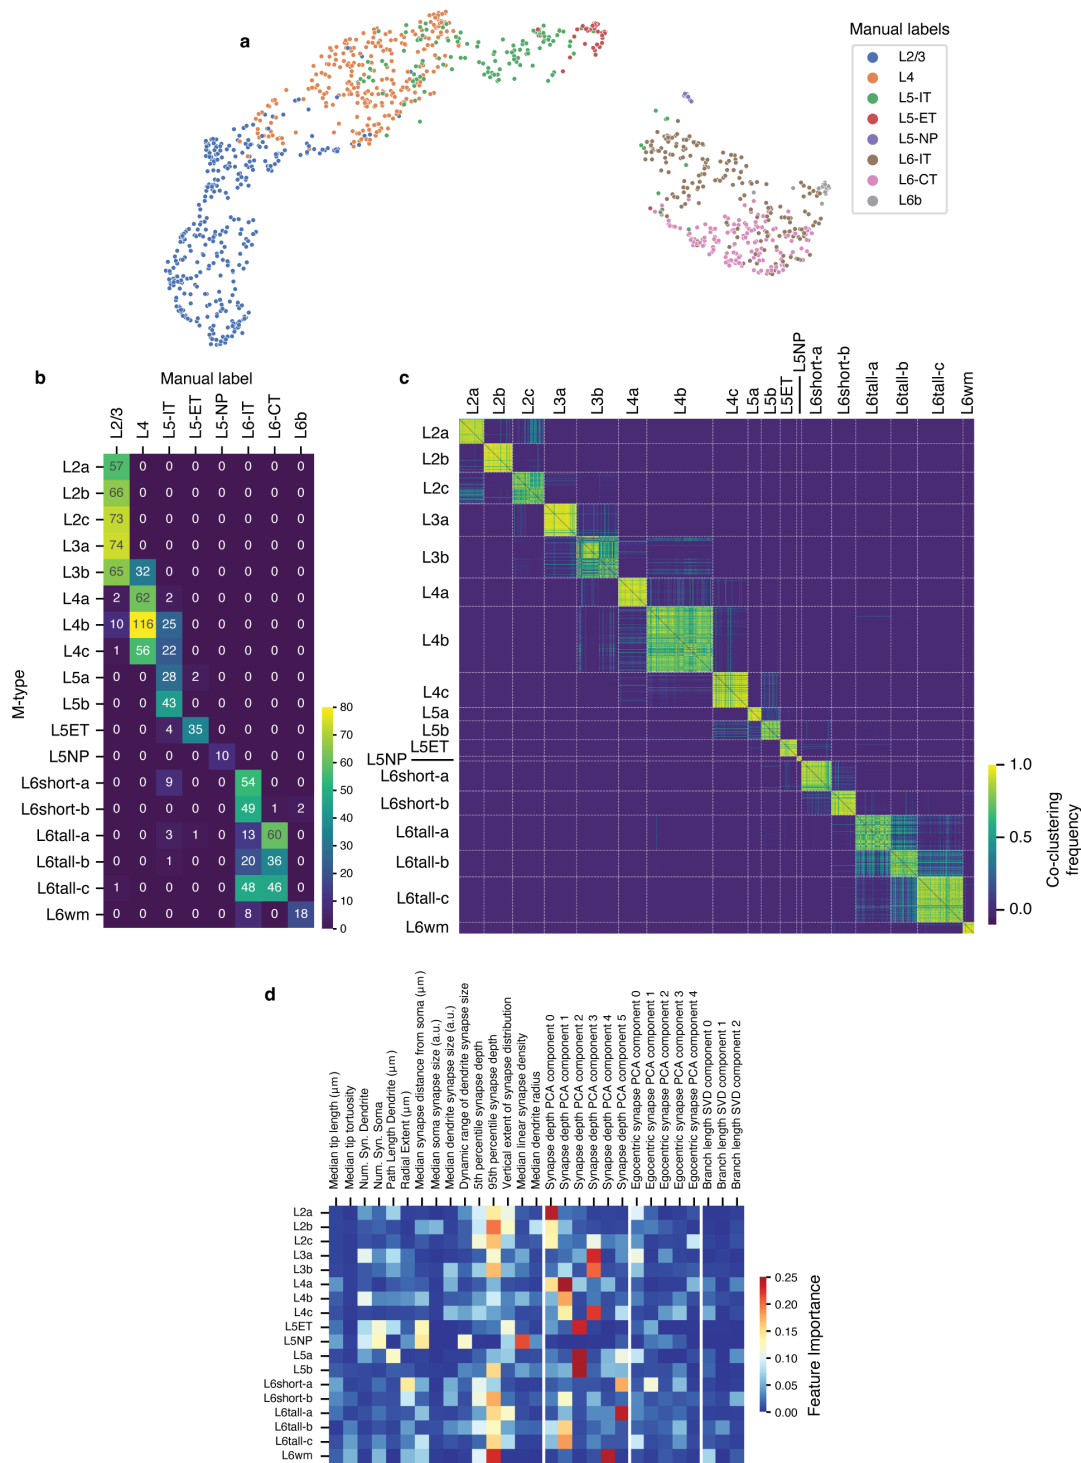

**Extended Data Figure 13.** M-type clustering and manual labels. **a**) Matrix of manual labels (x-axis) vs M-types. **b**) UMAP representation of features, colored by manually labeled cell types. **c**) Co-clustering matrix of excitatory cells, indicating their number of times a pair of cells was clustered together by iterations of phenograph. Cells are ordered by subsequent agglomerative clustering on this matrix. **d**) Feature importance for each M-type, based on training binary random forest classifiers to predict each M-type separately and computing the mean decrease in impurity for each feature.

## Extended Data Figure 14

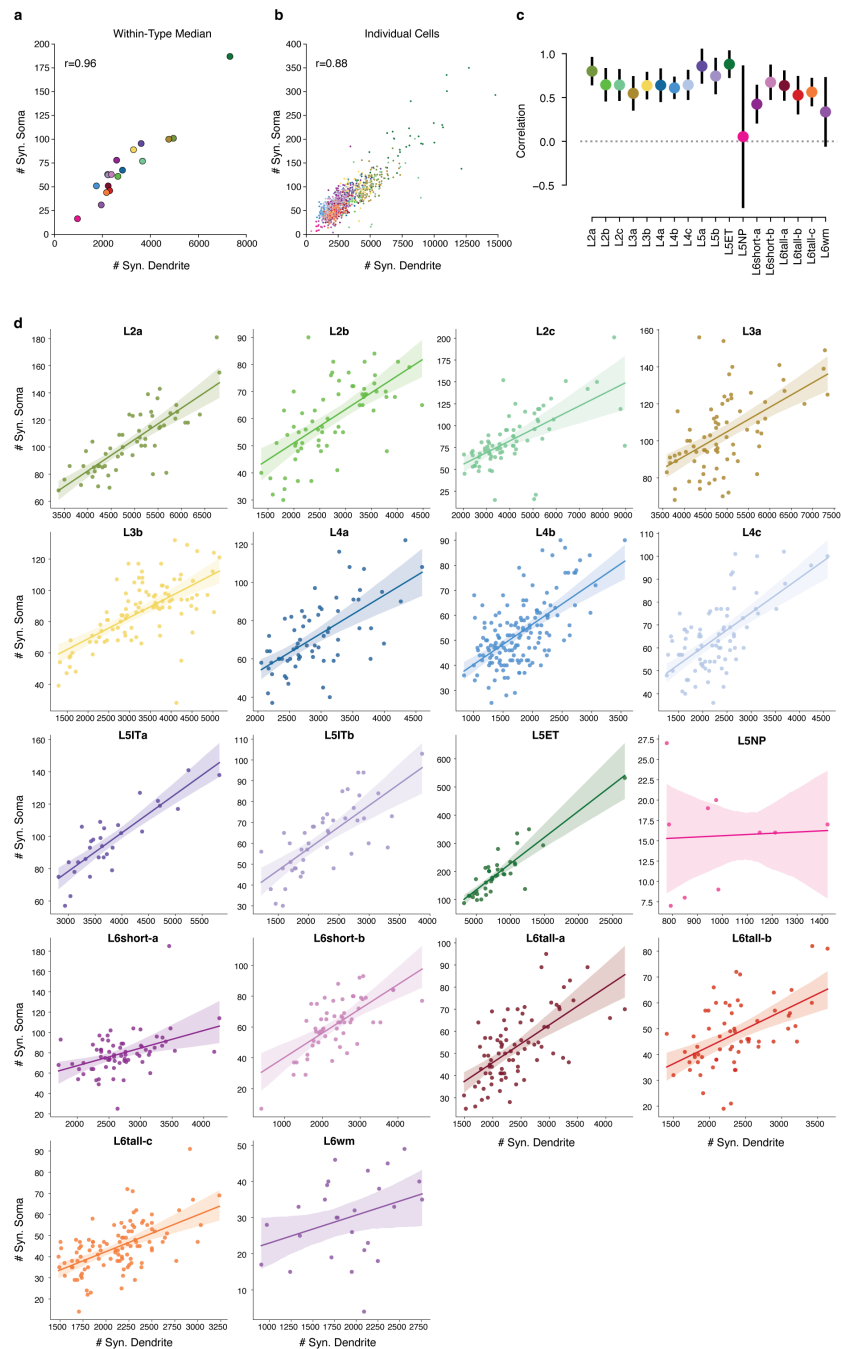

**Extended Data Figure 14.** Somatic versus dendritic synapses across all excitatory M-types. **a**) Median number of dendritic and somatic synapses for excitatory neurons of all M-types. Pearson  $r=0.96$ ,  $p=5 \times 10^{-10}$ . **b**) Number of dendritic and somatic input synapses across all excitatory neurons, colored by M-type. Pearson  $r=0.86$ ,  $p<1 \times 10^{-10}$ . Black line indicates linear fit with 95% confidence intervals from bootstrapping. **c**) Individual ordinary least square fits (with 95% confidence interval) for each M-type of z-scored dendritic synapses vs z-scored somatic synapses. With the exception of L5NP cells and deep layer 6b L6wm cells, all M-types have a positive relationship between predominantly-inhibitory somatic synapses and mostly excitatory dendritic synapses. **d**) Number of dendritic vs somatic input synapses for each M-type separately, linear fit line and 95% confidence interval.

## Extended Data Figure 15

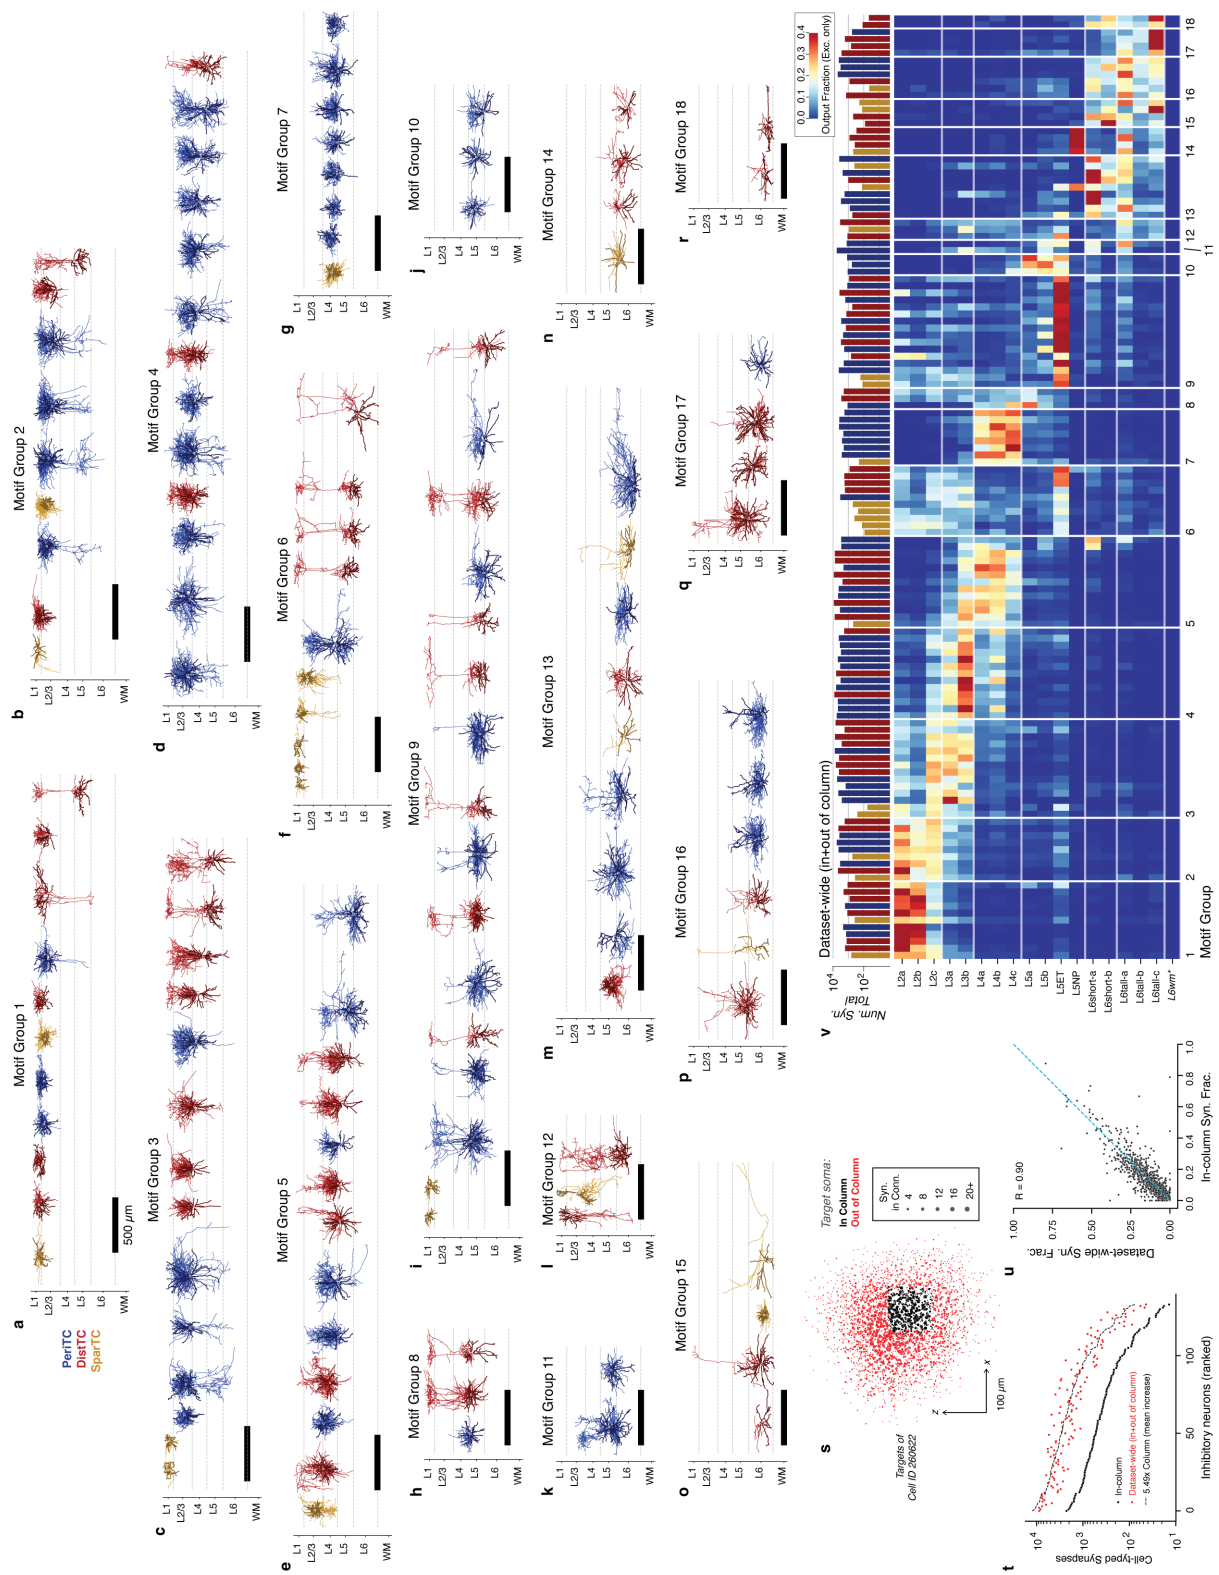

Extended Data Figure 15. Caption on next page.



**Extended Data Figure 15.** (Previous page.) Additional characterization of motif groups. **a–r)** Morphology of all cells, organized by motif group. Within each group, cells are ordered by soma depth. Colors indicate M-type, darker lines indicate dendrites. **s)** The arbors of cells extend well beyond the columnar data. The scatterplot depicts a top-down view of soma locations of all synaptic targets of Cell ID 260622. Black dots are cells within the column, red dots are cells outside the column sample; dot size is proportional to number of synapses. **t)** The number of synapses from each interneuron onto target neurons within the column (black) and anywhere the dataset (red). Interneurons were ordered by within-column synapse count. The mean cell had 5.49 times more synapses across the dataset than onto column targets alone (black dashed line). Only targets passing basic quality control criteria were included. Note that while cells outside the sampled column are not necessarily proofread, synapses onto unproofread dendrites are nearly always correct (see Methods). **u)** Scatterplot of output synapse budget values within-column and dataset-wide (see **v**). The blue line indicates equality. The Pearson correlation between within-column measurements with the dataset-wide measurements was  $R=0.9$ , not including trivial zeros (see Methods). **v)** Output synapse budget for for each interneurons onto dataset-wide target M-types, using predictions from perisomatic features from Elabbady et al.<sup>62</sup>. Note that the L6wm M-type was not included in predictions, and is thus trivially zero for all interneurons.

## Extended Data Figure 16

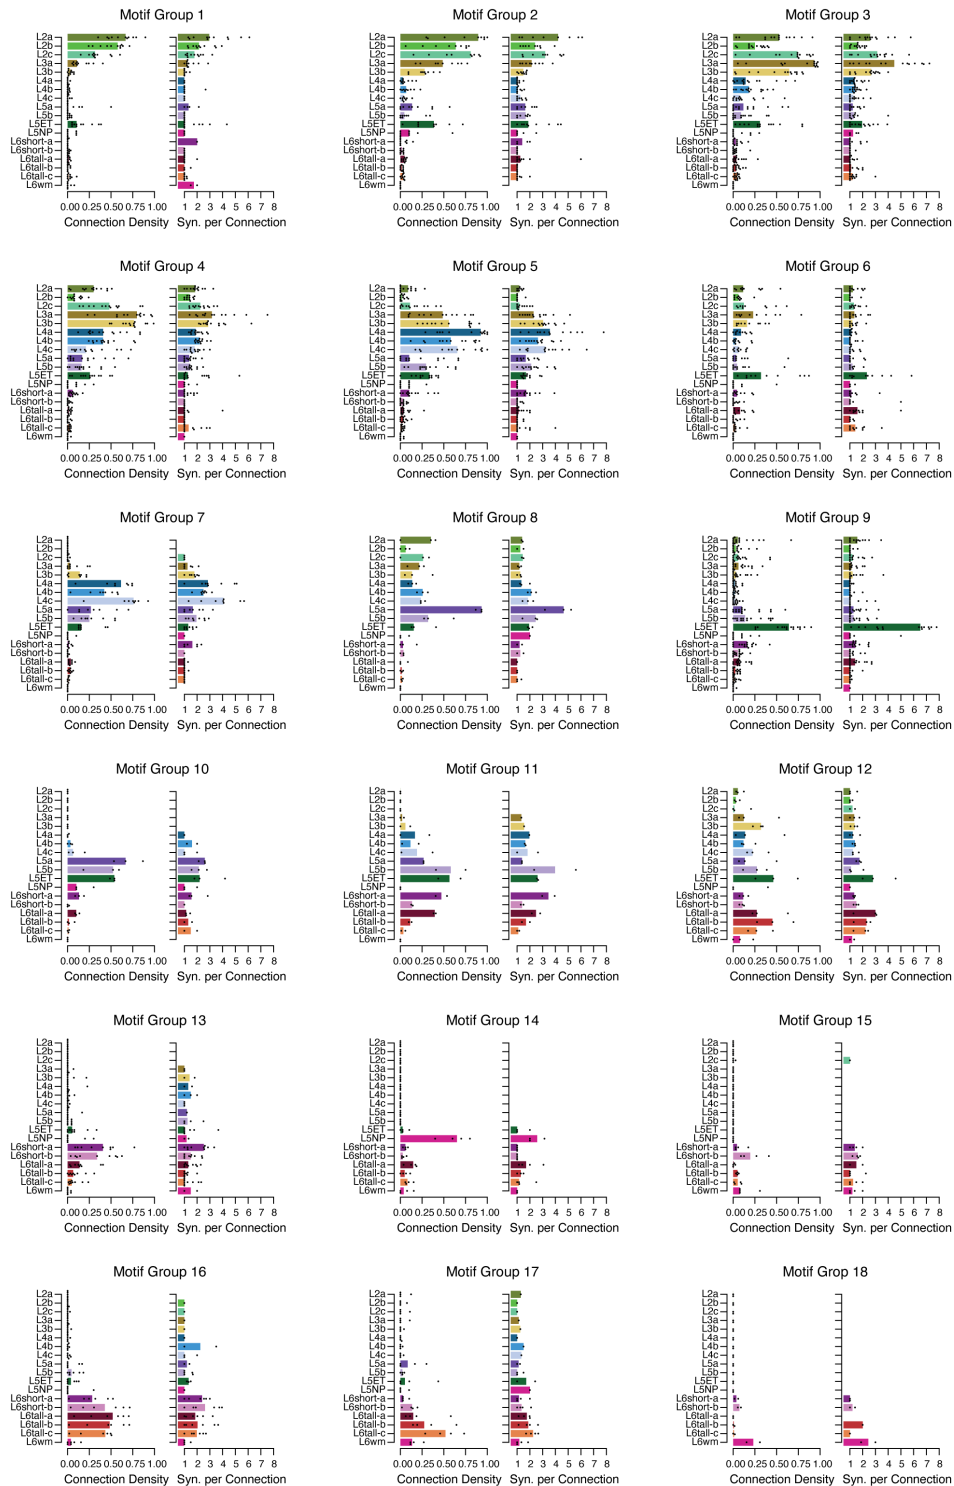

**Extended Data Figure 16.** Additional connectivity statistics within motif groups. Connection density (left) measures the fraction of cells for a given M-type within the column targeted with at least 1 synapse. Synapses per connection (right) measures the average number of synapses in each observed connection. Single cell values are represented by dots, median values are shown with bars.

## Extended Data Figure 17

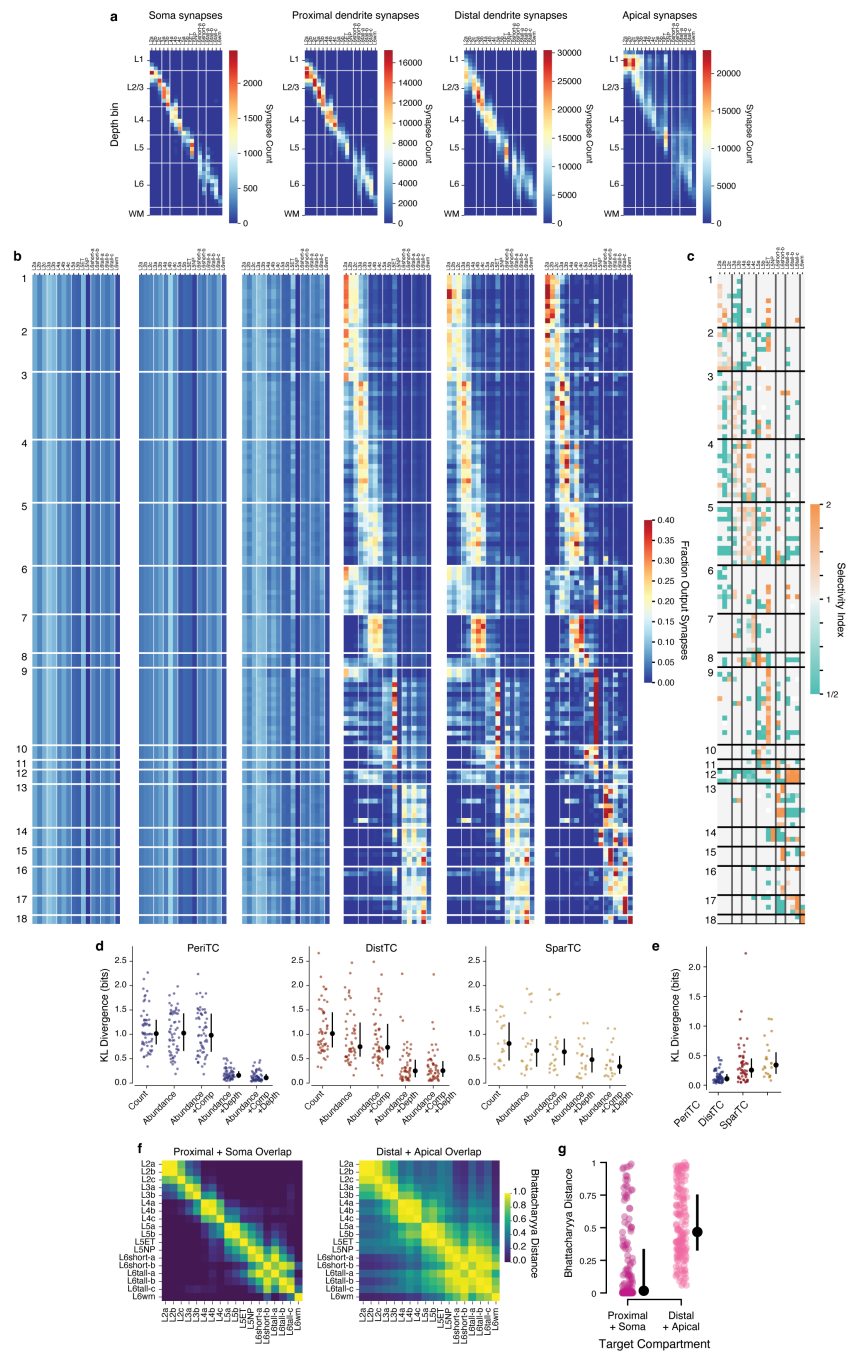

Extended Data Figure 17. See caption on next page.

**Extended Data Figure 17.** (Previous page.) Selectivity and null models for inhibitory connectivity. **a)** Number of synapses per M-type, compartment, and depth bin. These values were used as a the baseline against which to compare synaptic output distributions for each inhibitory neuron. **b)** Expected value of each presynaptic inhibitory neuron according to an increasingly complex set of null models. Each row represents the fraction of synaptic outputs from a given inhibitory neuron (ordered as in Figure 5e), distributed across excitatory M-types. From the left: 1) Synaptic outputs were proportional to the number of cells in a given M-type, regardless of location in space. This approach accounts for the differing cell frequency for each M-type. 2) Synaptic outputs were proportional to the net number of input synapses for a given M-type, regardless of location in space. This approach accounts for the diversity in synaptic inputs for each M-type. 3) Synaptic outputs were distributed across compartments for each inhibitory cell as observed, and distributed across M-types for each compartment separately. This approach accounts for the observed differences in compartment targeting for different interneurons. 4) Synaptic outputs were distributed across M-types within each of 50 depth bins, matching the observed depth distribution of synaptic outputs for each inhibitory neuron. This approach accounts for the spatial distribution of synapses, but not compartment targeting. 5) Synaptic outputs were distributed across M-types within both depth bins and compartments, matching the observed distribution of both. This approach accounts for both the spatial distribution of synapses and compartment targeting, and is the most complete model considered here. At the far right, the observed distribution on the same scale, repeating the data in Figure 5. **c)** Selectivity index (SI) for all cells, as described in the main text. Purple values have the observed number of output synapses significantly higher than a null model with matched compartment and depth targeting, while green are significantly less. Non-significant SI values are treated as 1. **d)** Difference between the observed distribution and the null model distribution for each cell as measured by the Kullback-Leibler divergence (from observed distribution to null distribution), by inhibitory subclass. Each colored dot is a cell, black dots are median with error bars indicating a 95% confidence interval based on a bootstrap. **e)** Comparison between the most complete null model across inhibitory subclasses. The PeriTCs have the lowest KL divergence of all types, indicating that the null model best predicts their connectivity. Note also that the individual cells exhibit a range of specificity relative to null models. **f)** Similarity of M-type synapse distributions in space, using the Bhattacharyya distance between the depth distribution of synaptic inputs onto soma and proximal dendrites (left) and distal and apical dendrite (right). Values closer to 1 indicate more similar distributions, values closer to 0 indicate more distinct distributions. **g)** All Bhattacharyya distance comparisons in **e**, with colored dots indicating pairs of distinct M-types, black dots indicating the median, and error bars showing a bootstrapped 95% confidence interval. Across all pairs, synaptic inputs onto the perisomatic and somatic compartments are more spatially segregated across different M-types than synaptic inputs onto distal and apical dendrites ( $p = 3.0 \times 10^{-19}$ , Mann-Whitney U test).

## Extended Data Cell Atlas

**Extended Data Cell Atlas 1.** Atlas of morphology and connectivity of all inhibitory neurons, organized by motif group. Cards depicting the connectivity and morphology of all inhibitory neurons in the column data, ordered first by motif group and then by soma depth. First row, left: Morphology of the cell, dendrites in red and axon in blue. Title reflects the subclass, cell id, and cell neuroglancer root id. First row, center: Violin plot showing the density of input synapses (red) and output synapses (blue) as a function of depth. Text labels give the total number of pre- and postsynaptic sites in the reconstruction. First row, right: Scatterplot depicting all synaptic outputs of the cell onto identified neurons in the dataset. Each dot is a synaptic output, the x-axis location reflects the depth of the target cell, and the y-axis reflects the depth of the synapse itself. Color indicates cell status: purple are excitatory neurons in the column, green are inhibitory neurons in the column, and gray are neurons outside the column. Second row, left two panels: Scatterplots showing synaptic outputs onto column excitatory cells (left, purple dots) and inhibitory cells (right, green dots), with the x-axis indicating the distance from soma of the synapse on the target neuron and y-axis indicated the depth of the synapse. Color indicates target compartment, with dots from darkest to lightest indicating soma, proximal dendrite, distal dendrite, and apical dendrite. Below, histograms of target distances from root (colored line) with cumulative distribution function indicated in gray. Second row, center: Compartment distribution of synaptic targets. Below, histogram of number of synapses by compartment. Above, SI for each compartment, accounting for the depth distribution of synapses and cell type targeting of the inhibitory neuron. Orange indicates significantly more synapses than a random shuffle, blue indicates significantly fewer, and gray indicates no significant difference. Error bar indicates 95% confidence interval. Second row, right panels: Cell type distribution of synaptic outputs. Left panel shows number of synapses per cell type, with colors indicating compartments as in the center panel. Right side, SI per target cell type, accounting for synapse depth and compartment targeting of the inhibitory neuron. Dot colors and error bars as in center panel.
